# Supplementary material for: The time-resolved transcriptome of C. elegans
Source: Genome Res. 2016 Oct;26(10):1441–50. doi: 10.1101/gr.202663.115 (PMC5052054; doi:10.1101/gr.202663.115)
Supplement: Supplemental Material [file supp_gr.202663.115_Supplemental_Table_S1.xlsx]

## Sheet: Sheet1
										Confirmed	Confirmed	Confirmed	Number of WormBase	Number of WormBase	Number of WormBase
Sample	RNA sample = total RNA or polyA +	submitted non-rDNA reads	%age of total reads that are non-rDNA	read length (bp)	%unique start	intergenic threshold (0.05)	%age true positives	sample most closely correlated	spearman coefficient for most closely correlated sample	SLs	introns	polyAs	genes>0.03 dcpm	genes>0.1	genes>1.0	SRA Sample Accession	SRA Run Accession						Project		Library description
N2_4cell_EE_RZ-56	total	14308414	76.5	100	37.7	102	0.61	N2_EE_50-0	0.851	8376	51263	82	10026	7243	4450	SRS311761	SRR493099,SRR493100						N2_4cell_EE_RZ-56		Caenorhabditis elegans N2 hand-picked 4 cell embryos ribo-zero treated library 1
N2_EE_50-0	polyA+	34496375	88.5	76,100,101	44	26	0.72	N2_EE_50-30	0.937	12890	58868	507	8335	6959	3809	SRS258165	SRR332921,SRR332922,SRR350954,SRR350955,SRR359063,SRR478539						N2_EE_50-0		C. elegans N2; Make eggs hatch in the absence of food to get them all in L1 arrest add food and wait 50 hours. Eggs are then harvested from the adults -- just a few have an egg or two. Then the eggs are incubated for 0 minutes.
N2_EE_50-30	polyA+	21450147	83.4	76,100,101	48.7	26	0.71	N2_EE_50-120	0.945	12449	57953	304	8775	7387	4132	SRS258085	SRR332923,SRR332924,SRR350956,SRR350957,SRR359065						N2_EE_50-30		C. elegans N2; Make eggs hatch in the absence of food to get them all in L1 arrest add food and wait 50 hours. Eggs are then harvested from the adults -- just a few have an egg or two. Then the eggs are incubated for 30 minutes.
N2_EE_50-60	polyA+	19814469	63.7	76,100	48.1	26	0.71	N2_EE_50-120	0.948	11917	58323	79	9054	7557	4012	SRS242229	SRR316196,SRR317083						N2_EE_50-60		C. elegans N2; Make eggs hatch in the absence of food to get them all in L1 arrest add food and wait 50 hours. Eggs are then harvested from the adults -- just a few have an egg or two. Then the eggs are incubated for 60 minutes.
**N2_EE_50-90	polyA+	44250425	89.9	76,100,101	48.1	52	0.85	N2_EE-2	0.952	11827	83208	1074	10834	8416	4041	SRS258166	SRR332925,SRR332926,SRR332927,SRR350958,SRR359066						N2_EE_50-90		C. elegans N2; Make eggs hatch in the absence of food to get them all in L1 arrest add food and wait 50 hours. Eggs are then harvested from the adults -- just a few have an egg or two. Then the eggs are incubated for 90 minutes.
**N2_EE_50-120	polyA+	28747874	56	76,100	50.8	52	0.71	N2_EE_50-60	0.948	13758	64181	515	9332	7746	4151	SRS242382	SRR316753,SRR317082,SRR350977						N2_EE_50-120		C. elegans N2; Make eggs hatch in the absence of food to get them all in L1 arrest add food and wait 50 hours. Eggs are then harvested from the adults -- just a few have an egg or two. Then the eggs are incubated for 120 minutes.
**N2_EE_50-150	polyA+	24002307	88.1	100	36.8	52	0.71	N2_EE_50-180	0.923	13937	65961	575	10013	8202	4035	SRS266274	SRR351023,SRR351024						N2_EE_50-150		C. elegans N2; Make eggs hatch in the absence of food to get them all in L1 arrest add food and wait 50 hours. Eggs are then harvested from the adults -- just a few have an egg or two. Then the eggs are incubated for 150 minutes.
**N2_EE_50-180	polyA+	44449738	84.4	100	25.8	26	0.75	N2_EE_50-210	0.931	10828	64387	485	9144	7249	3066	SRS266269	SRR351009						N2_EE_50-180		C. elegans N2; Make eggs hatch in the absence of food to get them all in L1 arrest add food and wait 50 hours. Eggs are then harvested from the adults -- just a few have an egg or two. Then the eggs are incubated for 180 minutes.
N2_EE_50-210	polyA+	17839758	42.1	100,101	31	52	0.69	N2_EE_50-180	0.931	10780	61325	606	9931	7926	3479	SRS266275	SRR351025,SRR351026,SRR351027,SRR351028,SRR351029,SRR359067						N2_EE_50-210		C. elegans N2; Make eggs hatch in the absence of food to get them all in L1 arrest add food and wait 50 hours. Eggs are then harvested from the adults -- just a few have an egg or two. Then the eggs are incubated for 210 minutes.
N2_EE_50-240	polyA+	17048751	58.8	100,101	21.4	95	0.55	N2_EE_50-180	0.881	5753	46440	231	9283	6665	2749	SRS266270	SRR351010,SRR351011,SRR351012,SRR359069						N2_EE_50-240		C. elegans N2; Make eggs hatch in the absence of food to get them all in L1 arrest add food and wait 50 hours. Eggs are then harvested from the adults -- just a few have an egg or two. Then the eggs are incubated for 240 minutes.
N2_EE_50-300	polyA+	22661340	87.1	100	56.1	52	0.82	N2_EE_50-420	0.971	10811	78606	1511	11131	9240	4761	SRS266880	SRR352279,SRR352280						N2_EE_50-300		C. elegans N2; Make eggs hatch in the absence of food to get them all in L1 arrest add food and wait 50 hours. Eggs are then harvested from the adults -- just a few have an egg or two. Then the eggs are incubated for 300 minutes.
N2_EE_50-330	polyA+	20011653	80.7	100	59.5	52	0.83	N2_EE_50-450	0.974	10080	79643	1860	11368	9440	4636	SRS266265	SRR351000,SRR351001						N2_EE_50-330		C. elegans N2; Make eggs hatch in the absence of food to get them all in L1 arrest add food and wait 50 hours. Eggs are then harvested from the adults -- just a few have an egg or two. Then the eggs are incubated for 330 minutes.
N2_EE_50-360	polyA+	19534264	83.6	100	51.6	26	0.8	N2_EE_50-390	0.955	13796	69670	1701	10048	8432	4395	SRS266266	SRR351002,SRR351003						N2_EE_50-360		C. elegans N2; Make eggs hatch in the absence of food to get them all in L1 arrest add food and wait 50 hours. Eggs are then harvested from the adults -- just a few have an egg or two. Then the eggs are incubated for 360 minutes.
N2_EE_50-390	polyA+	19685093	59	100	51.3	51	0.8	N2_EE_50-420	0.97	15366	74472	2120	11180	9283	5097	SRS266267	SRR351004,SRR351005,SRR351006,SRR478540						N2_EE_50-390		C. elegans N2; Make eggs hatch in the absence of food to get them all in L1 arrest add food and wait 50 hours. Eggs are then harvested from the adults -- just a few have an egg or two. Then the eggs are incubated for 390 minutes.
N2_EE_50-420	polyA+	21501631	78.7	100	50.8	51	0.83	N2_EE_50-450	0.974	15715	77514	1530	11131	9274	4640	SRS266268	SRR351007,SRR351008						N2_EE_50-420		C. elegans N2; Make eggs hatch in the absence of food to get them all in L1 arrest add food and wait 50 hours. Eggs are then harvested from the adults -- just a few have an egg or two. Then the eggs are incubated for 420 minutes.
N2_EE_50-450	polyA+	34174793	86.7	100	56.3	86	0.84	N2_EE_50-480	0.979	17059	86275	5574	11569	9741	4839	SRS266277	SRR351034,SRR351035						N2_EE_50-450		C. elegans N2; Make eggs hatch in the absence of food to get them all in L1 arrest add food and wait 50 hours. Eggs are then harvested from the adults -- just a few have an egg or two. Then the eggs are incubated for 450 minutes.
N2_EE_50-480	polyA+	32798372	88.4	100,101	54.4	83	0.85	N2_EE_50-510	0.979	17207	87808	4499	11921	9992	4635	SRS266271	SRR351013,SRR351014,SRR351015,SRR351016,SRR359090						N2_EE_50-480		C. elegans N2; Make eggs hatch in the absence of food to get them all in L1 arrest add food and wait 50 hours. Eggs are then harvested from the adults -- just a few have an egg or two. Then the eggs are incubated for 480 minutes.
N2_EE_50-510	polyA+	29582939	74.3	100,101	51.9	78	0.86	N2_EE_50-540	0.98	16266	87981	1773	12241	10286	4510	SRS266278	SRR351036,SRR351037,SRR351038,SRR351039,SRR359091						N2_EE_50-510		C. elegans N2; Make eggs hatch in the absence of food to get them all in L1 arrest add food and wait 50 hours. Eggs are then harvested from the adults -- just a few have an egg or two. Then the eggs are incubated for 510 minutes.
N2_EE_50-540	polyA+	33554999	88.8	100,101	54.5	75	0.88	N2_EE_50-570	0.98	12731	90093	5171	12266	10386	4555	SRS266272	SRR351017,SRR351018,SRR351019,SRR351020,SRR359087						N2_EE_50-540		C. elegans N2; Make eggs hatch in the absence of food to get them all in L1 arrest add food and wait 50 hours. Eggs are then harvested from the adults -- just a few have an egg or two. Then the eggs are incubated for 540 minutes.
N2_EE_50-570	polyA+	30578665	89.2	100,101	53.7	69	0.89	N2_EE_50-600	0.98	16373	91856	5029	12701	10751	4660	SRS266261	SRR350987,SRR350988,SRR350989,SRR359089						N2_EE_50-570		C. elegans N2; Make eggs hatch in the absence of food to get them all in L1 arrest add food and wait 50 hours. Eggs are then harvested from the adults -- just a few have an egg or two. Then the eggs are incubated for 570 minutes.
N2_EE_50-600	polyA+	27342704	87.8	100,101	56.3	60	0.89	N2_EE_50-630	0.982	14335	90696	2696	12703	10729	4368	SRS266262	SRR350990,SRR350991,SRR350992,SRR350993,SRR359088						N2_EE_50-600		C. elegans N2; Make eggs hatch in the absence of food to get them all in L1 arrest add food and wait 50 hours. Eggs are then harvested from the adults -- just a few have an egg or two. Then the eggs are incubated for 120 minutes.
N2_EE_50-630	polyA+	31873496	88.1	100	57.4	102	0.9	N2_EE_50-660	0.983	15623	94709	4492	13422	11461	5174	SRS266263	SRR350994,SRR350995,SRR350996						N2_EE_50-630		C. elegans N2; Make eggs hatch in the absence of food to get them all in L1 arrest add food and wait 50 hours. Eggs are then harvested from the adults -- just a few have an egg or two. Then the eggs are incubated for 120 minutes.
N2_EE_50-660	polyA+	28175996	82.5	100	57.4	102	0.9	N2_EE_50-630	0.983	16270	94969	4240	13694	11740	5242	SRS266264	SRR350996,SRR350997,SRR350998						N2_EE_50-660		C. elegans N2; Make eggs hatch in the absence of food to get them all in L1 arrest add food and wait 50 hours. Eggs are then harvested from the adults -- just a few have an egg or two. Then the eggs are incubated for 120 minutes.
N2_EE_50-690	polyA+	22963464	80.6	100	53.1	52	0.91	N2_EE_50-720	0.982	13019	91421	1884	13288	11392	4515	SRS266273	SRR351021,SRR351022						N2_EE_50-690		C. elegans N2; Make eggs hatch in the absence of food to get them all in L1 arrest add food and wait 50 hours. Eggs are then harvested from the adults -- just a few have an egg or two. Then the eggs are incubated for 120 minutes.
N2_EE_50-720	polyA+	27609204	84.6	100	53	71	0.92	N2_EE_50-690	0.982	15819	96556	5787	13767	11873	4786	SRS266279	SRR351040,SRR351041						N2_EE_50-720		C. elegans N2; Make eggs hatch in the absence of food to get them all in L1 arrest add food and wait 50 hours. Eggs are then harvested from the adults -- just a few have an egg or two. Then the eggs are incubated for 120 minutes.
20120223_EMB-0	total	23273797	55.3	50,100	45.1	73	0.65	20120223_EMB-30	0.903	13336	57184	3	8550	7139	4219	SRS931097	SRR2012783,SRR2012784,SRR2012785,SRR2012782						20120223_EMB-0		C. elegans N2 strain at University of Washington (Chau Huynh), synchronized L1s, grow 48 hours to YA, 20-25 large plates of YA, bleach, get synchronous large volume of embryos, sample at 0 minutes
20120223_EMB-30	total	26892436	58.4	50,100	43	104	0.66	20120223_EMB-60	0.924	13470	61030	1	9185	7365	4059	SRS931096	SRR2012779,SRR2012780,SRR2012781,SRR2012778						20120223_EMB-30		C. elegans N2 strain at University of Washington (Chau Huynh), synchronized L1s, grow 48 hours to YA, 20-25 large plates of YA, bleach, get synchronous large volume of embryos, sample at 30 minutes
20120223_EMB-60	total	20397162	47	50,100	45.9	106	0.67	20120223_EMB-90	0.927	12356	63206	0	9871	7830	4111	SRS931098	SRR2012787,SRR2012788,SRR2012789,SRR2012786						20120223_EMB-60		C. elegans N2 strain at University of Washington (Chau Huynh), synchronized L1s, grow 48 hours to YA, 20-25 large plates of YA, bleach, get synchronous large volume of embryos, sample at 60 minutes
20120223_EMB-90	total	25116244	50	50,100	41.6	169	0.63	20120223_EMB-120	0.934	12091	61894	1	9944	7801	3583	SRS931099	SRR2012791,SRR2012792,SRR2012793,SRR2012790						20120223_EMB-90		C. elegans N2 strain at University of Washington (Chau Huynh), synchronized L1s, grow 48 hours to YA, 20-25 large plates of YA, bleach, get synchronous large volume of embryos, sample at 90 minutes
20120223_EMB-120	total	25953593	66	50,100	44.8	247	0.62	20120223_EMB-90	0.934	11346	64730	8	10011	7968	3753	SRS931094	SRR2012769,SRR2012770,SRR2012771,SRR2012768						20120223_EMB-120		C. elegans N2 strain at University of Washington (Chau Huynh), synchronized L1s, grow 48 hours to YA, 20-25 large plates of YA, bleach, get synchronous large volume of embryos, sample at 120 minutes
20120223_EMB-150	total	33101100	34.6	50,100	44.1	317	0.62	20120419_EMB-120	0.937	12158	65620	3	9956	7968	3643	SRS931095	SRR2012775,SRR2012776,SRR2012777,SRR2012774						20120223_EMB-150		C. elegans N2 strain at University of Washington (Chau Huynh), synchronized L1s, grow 48 hours to YA, 20-25 large plates of YA, bleach, get synchronous large volume of embryos, sample at 150 minutes
20120223_EMB-180	total	27335024	71.1	50,100	46.5	258	0.62	20120223_EMB-150	0.931	10982	64396	6	10024	7970	3713	SRS932424	SRR2015284,SRR2015285,SRR2015286,SRR2015283						20120223_EMB-180		C. elegans N2 strain at University of Washington (Chau Huynh), synchronized L1s, grow 48 hours to YA, 20-25 large plates of YA, bleach, get synchronous large volume of embryos, sample at 180 minutes
20120223_EMB-210	total	23958442	60	50,100	44.9	218	0.62	20120419_EMB-180	0.927	9943	61725	7	9699	7801	3597	SRS932417	SRR2015255,SRR2015256,SRR2015257,SRR2015254						20120223_EMB-210		C. elegans N2 strain at University of Washington (Chau Huynh), synchronized L1s, grow 48 hours to YA, 20-25 large plates of YA, bleach, get synchronous large volume of embryos, sample at 210 minutes
20120223_EMB-240	total	19410020	64.7	50,100	43.2	200	0.63	20120419_EMB-180	0.935	9036	61577	0	10089	8110	3786	SRS932415	SRR2015247,SRR2015248,SRR2015249,SRR2015246						20120223_EMB-240		C. elegans N2 strain at University of Washington (Chau Huynh), synchronized L1s, grow 48 hours to YA, 20-25 large plates of YA, bleach, get synchronous large volume of embryos, sample at 240 minutes
20120223_EMB-270	total	23916325	78.1	50,100	45.3	293	0.63	20120223_EMB-300	0.934	11104	65145	2	10190	8202	3745	SRS932416	SRR2015251,SRR2015252,SRR2015253,SRR2015250						20120223_EMB-270		C. elegans N2 strain at University of Washington (Chau Huynh), synchronized L1s, grow 48 hours to YA, 20-25 large plates of YA, bleach, get synchronous large volume of embryos, sample at 270 minutes
20120223_EMB-300	total	24412418	73.5	50,100	50	415	0.62	20120223_EMB-360	0.937	11829	68561	1	10588	8425	3673	SRS932422	SRR2015276,SRR2015277,SRR2015278,SRR2015275						20120223_EMB-300		C. elegans N2 strain at University of Washington (Chau Huynh), synchronized L1s, grow 48 hours to YA, 20-25 large plates of YA, bleach, get synchronous large volume of embryos, sample at 300 minutes
20120223_EMB-330	total	19883415	40	50,100	50.8	411	0.62	20120223_EMB-360	0.94	11948	68653	5	11143	8746	3686	SRS932418	SRR2015260,SRR2015261,SRR2015262,SRR2015259						20120223_EMB-330		C. elegans N2 strain at University of Washington (Chau Huynh), synchronized L1s, grow 48 hours to YA, 20-25 large plates of YA, bleach, get synchronous large volume of embryos, sample at 330 minutes
20120223_EMB-360	total	23460307	62.1	50,100	48.6	388	0.66	20120223_EMB-390	0.95	8629	72233	3	10978	8886	3545	SRS932419	SRR2015264,SRR2015265,SRR2015266,SRR2015263						20120223_EMB-360		C. elegans N2 strain at University of Washington (Chau Huynh), synchronized L1s, grow 48 hours to YA, 20-25 large plates of YA, bleach, get synchronous large volume of embryos, sample at 360 minutes
20120223_EMB-390	total	19425436	28.6	50,100	52	405	0.65	20120223_EMB-420	0.953	10686	73082	5	11512	9173	3608	SRS932420	SRR2015268,SRR2015269,SRR2015270,SRR2015267						20120223_EMB-390		C. elegans N2 strain at University of Washington (Chau Huynh), synchronized L1s, grow 48 hours to YA, 20-25 large plates of YA, bleach, get synchronous large volume of embryos, sample at 390 minutes
20120223_EMB-420	total	24794620	25	50,100	53.3	633	0.63	20120223_EMB-450	0.953	12069	76265	1	11566	9242	3349	SRS932421	SRR2015272,SRR2015273,SRR2015274,SRR2015271						20120223_EMB-420		C. elegans N2 strain at University of Washington (Chau Huynh), synchronized L1s, grow 48 hours to YA, 20-25 large plates of YA, bleach, get synchronous large volume of embryos, sample at 420 minutes
20120223_EMB-450	total	24174914	43.1	50,100	53.2	538	0.67	20120419_EMB-360	0.953	12811	79941	3	12282	9635	3432	SRS932423	SRR2015280,SRR2015281,SRR2015282,SRR2015279						20120223_EMB-450		C. elegans N2 strain at University of Washington (Chau Huynh), synchronized L1s, grow 48 hours to YA, 20-25 large plates of YA, bleach, get synchronous large volume of embryos, sample at 450 minutes
20120223_EMB-480	total	23880825	31.1	50,100	53.5	599	0.66	20120223_EMB_540	0.947	12226	80389	3	12680	9832	3432	SRS932425	SRR2015288,SRR2015289,SRR2015290,SRR2015287						20120223_EMB-480		C. elegans N2 strain at University of Washington (Chau Huynh), synchronized L1s, grow 48 hours to YA, 20-25 large plates of YA, bleach, get synchronous large volume of embryos, sample at 480 minutes
20120223_EMB-510	total	18896444	29.5	50,100	54.2	434	0.68	20120223_EMB-540	0.96	11757	79948	2	13300	10053	3813	SRS932426	SRR2015292,SRR2015293,SRR2015294,SRR2015291						20120223_EMB-510		C. elegans N2 strain at University of Washington (Chau Huynh), synchronized L1s, grow 48 hours to YA, 20-25 large plates of YA, bleach, get synchronous large volume of embryos, sample at 510 minutes
20120223_EMB-540	total	20387699	36	50,100	50.5	394	0.71	20120223_EMB-510	0.96	11876	81522	9	12867	10236	3677	SRS932429	SRR2015298,SRR2015299,SRR2015300,SRR2015297						20120223_EMB-540		C. elegans N2 strain at University of Washington (Chau Huynh), synchronized L1s, grow 48 hours to YA, 20-25 large plates of YA, bleach, get synchronous large volume of embryos, sample at 540 minutes
20120223_EMB-570	total	27736784	51.6	50,100	41.9	455	0.76	20120223_EMB-600	0.962	11338	86694	8	13827	11222	4201	SRS932432	SRR2015307,SRR2015308,SRR2015309,SRR2015306						20120223_EMB-570		C. elegans N2 strain at University of Washington (Chau Huynh), synchronized L1s, grow 48 hours to YA, 20-25 large plates of YA, bleach, get synchronous large volume of embryos, sample at 570 minutes
20120223_EMB-600	total	22872017	65.3	50,100	45.7	433	0.73	20120223_EMB-570	0.962	11190	84733	5	13583	10944	3961	SRS932431	SRR2015303,SRR2015304,SRR2015305,SRR2015302						20120223_EMB-600		C. elegans N2 strain at University of Washington (Chau Huynh), synchronized L1s, grow 48 hours to YA, 20-25 large plates of YA, bleach, get synchronous large volume of embryos, sample at 600 minutes
20120411_EMB-0	total	18493144	78.9	100	27.1	83	0.62	20120419_EMB-30	0.913	8337	52226	7	9306	7595	3555	SRS932434	SRR2015312,SRR2015313						20120411_EMB-0		C. elegans N2 strain at University of Washington (Chau Huynh), synchronized L1s, grow 48 hours to YA, 20-25 large plates of YA, bleach, get synchronous large volume of embryos, sample at 0 minutes
20120411_EMB-60	total	17679117	72.1	100	14.4	92	0.56	20120411_EMB-0	0.898	5461	44872	10	9562	7785	2969	SRS932433	SRR2015310,SRR2015311						20120411_EMB-60		C. elegans N2 strain at University of Washington (Chau Huynh), synchronized L1s, grow 48 hours to YA, 20-25 large plates of YA, bleach, get synchronous large volume of embryos, sample at 60 minutes
20120411_EMB-90	total	16666867	83.1	100	27.5	153	0.6	20120419_EMB-120	0.921	7495	53699	12	10063	8079	3374	SRS932439	SRR2015322,SRR2015323						20120411_EMB-90		C. elegans N2 strain at University of Washington (Chau Huynh), synchronized L1s, grow 48 hours to YA, 20-25 large plates of YA, bleach, get synchronous large volume of embryos, sample at 90 minutes
20120411_EMB-120	total	8829221	28.4	100	32.7	71	0.59	20120419_EMB-120	0.913	7110	49699	6	9898	7780	3068	SRS932436	SRR2015316,SRR2015317						20120411_EMB-120		C. elegans N2 strain at University of Washington (Chau Huynh), synchronized L1s, grow 48 hours to YA, 20-25 large plates of YA, bleach, get synchronous large volume of embryos, sample at 120 minutes
20120411_EMB-150	total	15718086	82.3	100	34.7	142	0.62	20120419_EMB-180	0.925	8215	58067	6	10312	8190	3601	SRS932435	SRR2015314,SRR2015315						20120411_EMB-150		C. elegans N2 strain at University of Washington (Chau Huynh), synchronized L1s, grow 48 hours to YA, 20-25 large plates of YA, bleach, get synchronous large volume of embryos, sample at 150 minutes
20120411_EMB-180	total	16911129	77.6	100	39.1	186	0.6	20120419_EMB-180	0.934	8691	60410	4	10214	8030	3108	SRS932437	SRR2015318,SRR2015319						20120411_EMB-180		C. elegans N2 strain at University of Washington (Chau Huynh), synchronized L1s, grow 48 hours to YA, 20-25 large plates of YA, bleach, get synchronous large volume of embryos, sample at 180 minutes
20120411_EMB-240	total	19087900	76.6	100	39	227	0.65	20120419_EMB-300	0.934	8849	64358	11	10690	8451	3217	SRS932438	SRR2015320,SRR2015321						20120411_EMB-240		C. elegans N2 strain at University of Washington (Chau Huynh), synchronized L1s, grow 48 hours to YA, 20-25 large plates of YA, bleach, get synchronous large volume of embryos, sample at 240 minutes
20120411_EMB-300	total	19385273	58.5	100	29.4	432	0.61	20120419_EMB-300	0.924	6643	62858	13	11856	9134	3189	SRS932442	SRR2015326,SRR2015327						20120411_EMB-300		C. elegans N2 strain at University of Washington (Chau Huynh), synchronized L1s, grow 48 hours to YA, 20-25 large plates of YA, bleach, get synchronous large volume of embryos, sample at 300 minutes
20120411_EMB-360	total	22017663	87.1	100	49.6	375	0.72	20120419_EMB-360	0.965	9260	81369	10	12355	10022	3745	SRS932441	SRR2015324,SRR2015325						20120411_EMB-360		C. elegans N2 strain at University of Washington (Chau Huynh), synchronized L1s, grow 48 hours to YA, 20-25 large plates of YA, bleach, get synchronous large volume of embryos, sample at 360 minutes
20120411_EMB-600	total	16625704	55.9	100	33.8	335	0.65	N2_EE_50-720	0.922	8696	77041	14	13496	10667	3404	SRS932443	SRR2015328,SRR2015329						20120411_EMB-600		C. elegans N2 strain at University of Washington (Chau Huynh), synchronized L1s, grow 48 hours to YA, 20-25 large plates of YA, bleach, get synchronous large volume of embryos, sample at 600 minutes
20120419_EMB-30	total	16731585	87.5	100	43.8	114	0.62	20120223_EMB-90	0.921	9614	57772	13	9310	7686	4155	SRS932444	SRR2015330,SRR2015331						20120419_EMB-30		C. elegans N2 strain at University of Washington (Chau Huynh), synchronized L1s, grow 48 hours to YA, 20-25 large plates of YA, bleach, get synchronous large volume of embryos, sample at 30 minutes
20120419_EMB-90	total	17706544	73.8	100	44.1	161	0.62	20120419_EMB-120	0.924	8592	61655	6	10186	8107	4025	SRS932445	SRR2015332,SRR2015333						20120419_EMB-90		C. elegans N2 strain at University of Washington (Chau Huynh), synchronized L1s, grow 48 hours to YA, 20-25 large plates of YA, bleach, get synchronous large volume of embryos, sample at 90 minutes
20120419_EMB-120	total	17572953	66.5	100	38	119	0.63	20120223_EMB-150	0.937	7751	59522	8	10052	7976	3483	SRS932475	SRR2015473,SRR2015474						20120419_EMB-120		C. elegans N2 strain at University of Washington (Chau Huynh), synchronized L1s, grow 48 hours to YA, 20-25 large plates of YA, bleach, get synchronous large volume of embryos, sample at 120 minutes
20120419_EMB-150	total	14734316	88.4	100	45.3	154	0.62	20120419_EMB-180	0.922	7517	59288	7	10167	8115	4011	SRS932476	SRR2015475,SRR2015476						20120419_EMB-150		C. elegans N2 strain at University of Washington (Chau Huynh), synchronized L1s, grow 48 hours to YA, 20-25 large plates of YA, bleach, get synchronous large volume of embryos, sample at 150 minutes
20120419_EMB-180	total	18316675	78.2	100	43.2	166	0.65	20120223_EMB-240	0.935	8326	64744	5	10451	8388	3821	SRS932477	SRR2015477,SRR2015478						20120419_EMB-180		C. elegans N2 strain at University of Washington (Chau Huynh), synchronized L1s, grow 48 hours to YA, 20-25 large plates of YA, bleach, get synchronous large volume of embryos, sample at 180 minutes
20120419_EMB-240	total	19043636	52.4	100	42.1	205	0.66	20120419_EMB-300	0.938	8326	67297	3	10917	8696	3434	SRS932478	SRR2015479,SRR2015480						20120419_EMB-240		C. elegans N2 strain at University of Washington (Chau Huynh), synchronized L1s, grow 48 hours to YA, 20-25 large plates of YA, bleach, get synchronous large volume of embryos, sample at 240 minutes
20120419_EMB-270	total	13731617	75.5	100	41.6	140	0.68	20120419_EMB-300	0.937	6836	63949	23	11047	8823	3722	SRS932479	SRR2015481,SRR2015482						20120419_EMB-270		C. elegans N2 strain at University of Washington (Chau Huynh), synchronized L1s, grow 48 hours to YA, 20-25 large plates of YA, bleach, get synchronous large volume of embryos, sample at 270 minutes
20120419_EMB-300	total	16072439	80.9	100	49.5	270	0.68	20120223_EMB-390	0.951	9780	72798	9	11486	9357	3868	SRS932480	SRR2015483,SRR2015484						20120419_EMB-300		C. elegans N2 strain at University of Washington (Chau Huynh), synchronized L1s, grow 48 hours to YA, 20-25 large plates of YA, bleach, get synchronous large volume of embryos, sample at 300 minutes
20120419_EMB-330	total	14834183	40.7	100	47	256	0.69	20120419_EMB-360	0.949	8354	72252	9	12098	9680	3858	SRS932481	SRR2015485,SRR2015486						20120419_EMB-330		C. elegans N2 strain at University of Washington (Chau Huynh), synchronized L1s, grow 48 hours to YA, 20-25 large plates of YA, bleach, get synchronous large volume of embryos, sample at 330 minutes
20120419_EMB-360	total	19254246	82.4	100	53.4	328	0.72	20120411_EMB-360	0.965	10581	79284	7	12314	9873	3787	SRS932482	SRR2015487,SRR2015488						20120419_EMB-360		C. elegans N2 strain at University of Washington (Chau Huynh), synchronized L1s, grow 48 hours to YA, 20-25 large plates of YA, bleach, get synchronous large volume of embryos, sample at 360 minutes
20120419_EMB-420	total	17528609	81.7	100	54.1	430	0.69	20120419_EMB-450	0.961	9482	80233	7	14863	10732	3848	SRS932483	SRR2015489,SRR2015490						20120419_EMB-420		C. elegans N2 strain at University of Washington (Chau Huynh), synchronized L1s, grow 48 hours to YA, 20-25 large plates of YA, bleach, get synchronous large volume of embryos, sample at 420 minutes
20120419_EMB-450	total	19158312	78.2	100	54	478	0.68	20120419_EMB-420	0.961	10404	82107	7	13386	10521	3737	SRS932484	SRR2015491,SRR2015492						20120419_EMB-450		C. elegans N2 strain at University of Washington (Chau Huynh), synchronized L1s, grow 48 hours to YA, 20-25 large plates of YA, bleach, get synchronous large volume of embryos, sample at 450 minutes
L1	polyA+	78641050	66.5	36,50	41.7	49	0.91	N2_L1-1	0.951	19945	86566	9914	12907	10935	4176	SRS003005	SRR016679,SRR016680,SRR016681,SRR016683						L1		C. elegans N2 larva mid-L1 25dC 4.0 hrs post-L1 ; after bleaching and getting arresed L1s (all at 25 degrees C, animals were placed onto a large seeded plate for 4 hours. They were then washed off the plate, washed of all excess food, and then placed on unseeded plate for 1 hour to allow them to digest any bacteria, and then collected the L1s for RNA isolation.
N2_L1-1	polyA+	73807651	80.7	76	35.2	52	0.89	L1	0.951	13649	86882	71	11734	9592	2806	SRS151153	SRR089821,SRR089822,SRR089823						N2_L1-1		Caenorhabditis elegans N2 larval L1 RNA biological replicate L1-1; after bleaching and getting arresed L1s (all at 25 degrees C, animals were placed onto a large seeded plate for 4 hours. They were then washed off the plate, washed of all excess food, and then placed on unseeded plate for 1 hour to allow them to digest any bacteria, and then collected the L1s for RNA isolation.
L2*	polyA+	24346186	21	36	55.4	50	0.89	N2_L2-4	0.955	10094	75949	2150	14006	11793	4701	SRS001788	SRR006511,SRR006512,SRR006513						L2*		C. elegans N2 larva mid-L2 25dC 17.75hrs post-L1; C. elegans synchronized L1 larvae starved overnight in M9, grown on OP50-1 plates for 26 hour at 23 C until mid-L2 stage postdeirid sensory organelle detected.
N2_L2-4	polyA+	20583023	73	76	40.1	26	0.89	L2	0.955	8657	78413	110	12364	10058	2906	SRS174229	SRR125337,SRR125338,SRR125339						N2_L2-4		C. elegans N2 larval L2 RNA biological replicate L2-4; Exact times for growth after plating of starved L1s (all at 25 degrees C) were as follows: L2 worms were grown for 17.75 hours (Pn.p cells visible but not divided, gonad just starting to proliferate).
L3*	polyA+	20714513	29.9	36	54	26	0.9	N2_L3-1	0.955	9919	73832	3357	14037	11725	4514	SRS001790	SRR006519,SRR006520						L3*		C. elegans N2 larva mid-L3 25dC 26.75 hrs post-L1; Exact times for growth after plating of starved L1s (all at 25 degrees C) were as follows: L3 for 26.75 hours (Pn.p cells divided once or twice; gonad just starting to turn up).
N2_L3-1	polyA+	56220951	70	76	40.5	26	0.95	L3	0.955	10323	91415	167	13093	10451	2969	SRS150938	SRR089405,SRR089406,SRR089407						N2_L3-1		C. elegans N2 larval L3 RNA biological replicate L3-1; Exact times for growth after plating of starved L1s (all at 25 degrees C) were as follows: L3 for 26.75 hours (Pn.p cells divided once or twice; gonad just starting to turn up).
DauerDAF2	polyA+	31472949	83.2	76,100	34.2	26	0.85	DauerExitDAF2-2	0.966	12025	68871	63	12288	9970	2752	SRS004859	SRR027187,SRR027188						DauerDAF2		Caenorhabditis elegans dauer daf-2(el370) RNA sample 1; Synchronized L1 worms cultured at 25degC for about 91 hrs to a point at which ~100% worms are resistant to 1% SDS treatment.
DauerDAF2-2	polyA+	5153461	14.7	76,100	38.3	26	0.79	DauerEntryDAF2	0.955	6499	63680	78	13212	10792	3199	SRS269390	SRR360122,SRR360123						DauerDAF2-2		Caenorhabditis elegans dauer daf-2(el370) RNA sample 2; Synchronized L1 worms cultured at 25degC for about 91 hrs to a point at which ~100% worms are resistant to 1% SDS treatment.
DauerDAF2-2-1	polyA+	53597004	86.5	100	49.4	196	0.89	DauerDAF2-5-1	0.986	21072	103721	1590	13708	11446	4501	SRS269389	SRR360120,SRR360121						DauerDAF2-2-1		Caenorhabditis elegans dauer daf-2(el370) RNA sample 2-1; Synchronized L1 worms cultured at 25degC for about 91 hrs to a point at which ~100% worms are resistant to 1% SDS treatment.
DauerDAF2-5-1	polyA+	68517471	87.1	100	48	270	0.88	DauerDAF2-2-1	0.986	15131	107240	6717	13693	11394	4406	SRS269391	SRR360124,SRR360125						DauerDAF2-5-1		Caenorhabditis elegans dauer daf-2(el370) RNA sample 5-1; Synchronized L1 worms cultured at 25degC for about 91 hrs to a point at which ~100% worms are resistant to 1% SDS treatment.
DauerEntryDAF2	polyA+	30868459	83	100,101	40.8	26	0.88	DauerEntryDAF2-1-1	0.96	11671	72771	12	12881	10624	3247	SRS004860	SRR027189,SRR027190						DauerEntryDAF2		Caenorhabditis elegans dauer entry daf-2(el370) RNA sample 1; Synchronized L1 worms were cultured at 25degC for 48 hrs to a point at which 50% worms are resistant to 1% SDS treatment (Dauer assay).
DauerEntryDAF2-1-1	polyA+	17055433	86.4	100,101	50.8	49	0.91	DauerEntryDAF2	0.96	13965	91630	387	13813	11635	4288	SRS269109	SRR358688,SRR358689,SRR358690,SRR358691,SRR358692						DauerEntryDAF2-1-1		Caenorhabditis elegans dauer entry daf-2(el370) RNA sample 1-1; Synchronized L1 worms were cultured at 25degC for 48 hrs to a point at which 50% worms are resistant to 1% SDS treatment (Dauer assay).
DauerEntryDAF2-2	polyA+	26270046	66.3	76	37.4	46	0.89	DauerExitDAF2-3-1	0.961	12202	84278	65	12923	10529	3095	SRS174141	SRR124275,SRR124276						DauerEntryDAF2-2		Caenorhabditis elegans dauer entry daf-2(el370) RNA sample 2; Synchronized L1 worms were cultured at 25degC for 48 hrs to a point at which 50% worms are resistant to 1% SDS treatment (Dauer assay).
DauerEntryDAF2-4-1	polyA+	31720072	85.1	100	49.4	74	0.91	DauerEntryDAF2-1-1	0.95	18262	98672	1156	14251	11917	5093	SRS269110	SRR358693,SRR358694						DauerEntryDAF2-4-1		Caenorhabditis elegans dauer entry daf-2(el370) RNA sample 4-1; Synchronized L1 worms were cultured at 25degC for 48 hrs to a point at which 50% worms are resistant to 1% SDS treatment (Dauer assay).
DauerExitDAF2-2	polyA+	9544428	27.4	76	33.6	37	0.79	DauerDAF2	0.966	7807	66527	90	12276	9760	2416	SRS151144	SRR089798						DauerExitDAF2-2		Caenorhabditis elegans dauer exit daf-2(el370) RNA sample 2; dauer worms (91 hrs after culturing at 25degC) shifted to 15degC to allow recovery from dauer for 12hrs to a point at which ~24% worms are resistant to 1% SDS treatment.
DauerExitDAF2-3-1	polyA+	22462858	83.5	100,101	48.6	53	0.91	DauerExitDAF2-6-1	0.978	15495	93887	195	13555	11441	4439	SRS269108	SRR358683,SRR358684,SRR358685,SRR358686,SRR358687						DauerExitDAF2-3-1		Caenorhabditis elegans dauer exit daf-2(el370) RNA sample 3-1; dauer worms (91 hrs after culturing at 25degC) shifted to 15degC to allow recovery from dauer for 12hrs to a point at which ~24% worms are resistant to 1% SDS treatment.
DauerExitDAF2-6-1	polyA+	35417397	88.8	100,101	49.3	96	0.9	DauerExitDAF2-3-1	0.978	13382	99395	1430	13803	11532	4525	SRS269111	SRR358695,SRR358696,SRR358697,SRR358698,SRR358699						DauerExitDAF2-6-1		Caenorhabditis elegans dauer exit daf-2(el370) RNA sample 6-1; dauer worms (91 hrs after culturing at 25degC) shifted to 15degC to allow recovery from dauer for 12hrs to a point at which ~24% worms are resistant to 1% SDS treatment.
L4MALE	polyA+	34248277	63.4	36	46.5	26	0.93	L4MALE5	0.953	11189	81328	49	14971	12548	4334	SRS003000	SRR016684,SRR016685,SRR016686						L4MALE		Caenorhabditis elegans N2 mid-L4 male RNA sample 1; Embryos are placed in S-basal buffer and incubated at 25 deg over night to hatch the L1s. We then put the hatched L1s on a seeded NGM plate at 25 deg for 30 hours. At 30 hours, the resulting worms are in the L4 stage, and all are males because the hermpahrodites die due to a failure to initiate dosage compensation, as confirmed by examination un…
L4MALE5	polyA+	27153609	77.6	76	38.1	26	0.94	L4MALE	0.953	12881	91877	70	14869	12456	3771	SRS174140	SRR124273,SRR124274						L4MALE5		Caenorhabditis elegans N2 mid-L4 male RNA sample 5; Embryos are placed in S-basal buffer and incubated at 25 deg over night to hatch the L1s. We then put the hatched L1s on a seeded NGM plate at 25 deg for 30 hours. At 30 hours, the resulting worms are in the L4 stage, and all are males because the hermpahrodites die due to a failure to initiate dosage compensation, as confirmed by examination un…
L4*	polyA+	12905354	28.4	36	56.5	26	0.88	L4b	0.931	9446	69206	2558	14267	12279	4607	SRS001791	SRR006517,SRR006518						L4*		Caenorhabditis elegans N2 mid L4; Exact times for growth after plating of starved L1s (all at 25 degrees C) were as follows: L4 for 34.25 hours (vulvae are in Christmas tree stage gonad has passed bend, sperm are present).
L4b	polyA+	27893207	42.3	36	28.7	26	0.84	DC-1-5	0.955	10278	64286	39	13033	10241	2890	SRS004864	SRR023579,SRR023580,SRR023581,SRR023579,SRR023580,SRR023581						L4b		Caenorhabditis elegans N2 mid L4; Exact times for growth after plating of starved L1s (all at 25 degrees C) were as follows: L4 for 34.25 hours (vulvae are in Christmas tree stage gonad has passed bend, sperm are present).
L4JK1107soma	polyA+	62744283	83.9	36	18.4	26	0.85	L4JK1107soma_2	0.959	14568	66346	327	11114	7895	2200	SRS008269	SRR031122,SRR031123						L4JK1107soma		Caenorhabditis elegans strain JK1107 mid-L4 male soma only no DNaseI RNA sample 2; L4 animals with essentially no germ cells, and therefore considered a "soma-only" sample. From the strain JK1107, which carries the temperature sensitive glp-1(q224) allele that prevents germ cell proliferation at high temperatures of 25 C, at which these samples were isolated. These were not DNaseI treated.
L4JK1107soma-2	polyA+	24344909	66.8	76	28	26	0.86	L4JK1107soma	0.959	9231	73415	47	12247	9464	2924	SRS151145	SRR089799						L4JK1107soma-2		Caenorhabditis elegans strain JK1107 mid-L4 male soma only no DNaseI RNA sample 2; L4 animals with essentially no germ cells, and therefore considered a "soma-only" sample. From the strain JK1107, which carries the temperature sensitive glp-1(q224) allele that prevents germ cell proliferation at high temperatures of 25 C, at which these samples were isolated. These were not DNaseI treated.
YA*	polyA+	20906915	34.3	36	58.4	26	0.88	N2_Yad-1	0.976	10486	70667	6359	13868	11515	5238	SRS001789	SRR006514,SRR006515,SRR006516						YA*		Caenorhabditis elegans N2 young adult ; Exact times for growth after plating of starved L1s (all at 25 degrees C) were as follows: Young Adult (pre-gravid) for 46 hours (vulvae fully formed and oocytes present in gonad, but no embryos).
N2_Yad-1	polyA+	22632847	75.7	76	42.5	26	0.89	YA	0.976	9245	77405	51	12613	10052	3914	SRS178501	SRR125481,SRR125482						N2_Yad-1		Caenorhabditis elegans N2 young adult YA RNA biological replicate Yad-1
AdultSPE9	polyA+	65295186	92	36	38.4	26	0.88	Harpo	0.966	18595	70921	193	11527	9050	4083	SRS004857	SRR023534,SRR023535,SRR023536,SRR023537						AdultSPE9		Caenorhabditis elegans N2 adult spe-9(hc88) 23dC 8 days post-L4 mold ; synchronized spe-9(hc88) L1 worms cultured at 23°C for 8 days after L4 molt
N2_Ad_gonad-1-RZLI	total	14715864	90.7	50,100	40.2	26	0.6	OPDC-2-12	0.695	10368	56167	1	7867	6163	3736	SRS344182	SRR504338,SRR504339,SRR578034						N2_Ad_gonad-1-RZLI		C. elegans N2 adult gonad ribozero, low input
					percentage of reads with non-identical alignments start sites
						scoring threshold; for bases with a score above this threshold there is only 5% probability that the base is not a coding base (see Hillier et al., 2009 for a full explanation); the lower the threshold the more "clean" the library
							when using the score threshold in column G, the percentage of "gold exons" (known coding bases, see Hillier et al., 2009) that have read coverage from this sample; an indicator of the %age of transcripts expressed in this sample
								sample most closely correlate to this sample using a Spearman correlation (correlation coefficient is in column J)
*Those stage names followed by an "*" were included in the Hillier et al., 2009 Genome Research article; all other samples are new since that time
*Those stage names preceded by an "*" were not included in the analyes presented here
