# Supplementary material for: The time-resolved transcriptome of C. elegans
Source: Genome Res. 2016 Oct;26(10):1441–50. doi: 10.1101/gr.202663.115 (PMC5052054; doi:10.1101/gr.202663.115)
Supplement: Supplemental Material [file supp_gr.202663.115_Supplemental_Table_S4.xlsx]

## Sheet: UP DOWN regulated gene counts
	# IN THIS SET, including the 4cell as the first in the embryonic time series
	logFC >=0 , p<=0.05=================================================						logFC >=1 , p<=0.05================================================
	80 minutes
	down	fraction down	zero	fraction zero	up	fraction up	down	fraction down	zero	fraction zero	up	fraction up
	1281	0.14	6220	0.67	1802	0.19	1281	0.14	6220	0.67	1802	0.19	N2_4cell_EE_RZ-56.20120223_EMB-0.20120223_EMB-60.20120223_EMB-90
	1621	0.17	6596	0.68	1428	0.15	1369	0.14	7020	0.73	1256	0.13	20120223_EMB-60.20120223_EMB-90.20120419_EMB-120.20120223_EMB-150
	988	0.1	7807	0.78	1187	0.12	871	0.09	8002	0.8	1109	0.11	20120419_EMB-120.20120223_EMB-150.20120419_EMB-180.20120411_EMB-180
	918	0.09	8472	0.82	990	0.1	755	0.07	8747	0.84	878	0.08	20120419_EMB-180.20120411_EMB-180.20120223_EMB-300.20120419_EMB-270
	496	0.04	9151	0.83	1428	0.13	396	0.04	9338	0.84	1341	0.12	20120223_EMB-300.20120419_EMB-270.20120223_EMB-390.20120419_EMB-330
	640	0.05	9709	0.79	2018	0.16	493	0.04	9938	0.8	1936	0.16	20120223_EMB-390.20120419_EMB-330.20120223_EMB-480.20120419_EMB-420
	840	0.07	10780	0.84	1278	0.1	458	0.04	11389	0.88	1051	0.08	20120223_EMB-480.20120419_EMB-420.20120223_EMB-570.20120223_EMB-600
	100	minutes					minutes
	down	fraction down	zero	fraction zero	up	fraction up	down	fraction down	zero	fraction zero	up	fraction up
	1060	0.11	6806	0.71	1779	0.18	1060	0.11	6806	0.71	1779	0.18	N2_4cell_EE_RZ-56.20120223_EMB-0.20120223_EMB-90.20120411_EMB-60
	1489	0.15	7797	0.76	925	0.09	1489	0.15	7797	0.76	925	0.09	20120223_EMB-90.20120411_EMB-60.20120419_EMB-150.20120411_EMB-150
	1577	0.15	6749	0.64	2209	0.21	1026	0.1	7671	0.73	1838	0.17	20120419_EMB-150.20120411_EMB-150.20120419_EMB-240.20120411_EMB-240
	1115	0.1	8642	0.77	1407	0.13	816	0.07	9138	0.82	1210	0.11	20120419_EMB-240.20120411_EMB-240.20120223_EMB-390.20120419_EMB-330
	640	0.05	9709	0.79	2018	0.16	493	0.04	9938	0.8	1936	0.16	20120223_EMB-390.20120419_EMB-330.20120223_EMB-480.20120419_EMB-420
	840	0.07	10780	0.84	1278	0.1	458	0.04	11389	0.88	1051	0.08	20120223_EMB-480.20120419_EMB-420.20120223_EMB-570.20120223_EMB-600
	120	minutes					minutes
	down	fraction down	zero	fraction zero	up	fraction up	down	fraction down	zero	fraction zero	up	fraction up
	1369	0.14	6312	0.65	2070	0.21	1369	0.14	6312	0.65	2070	0.21	N2_4cell_EE_RZ-56.20120223_EMB-0.20120411_EMB-60.20120419_EMB-90
	1668	0.16	7397	0.71	1300	0.13	1668	0.16	7397	0.71	1300	0.13	20120411_EMB-60.20120419_EMB-90.20120419_EMB-180.20120411_EMB-180
	2017	0.19	6358	0.61	2080	0.2	1528	0.15	7234	0.69	1693	0.16	20120419_EMB-180.20120411_EMB-180.20120223_EMB-330.20120223_EMB-360
	2753	0.24	5137	0.45	3453	0.3	824	0.07	7781	0.69	2738	0.24	20120223_EMB-330.20120223_EMB-360.20120223_EMB-450.20120223_EMB-480
	2549	0.2	6927	0.55	3187	0.25	866	0.07	9528	0.75	2269	0.18	20120223_EMB-450.20120223_EMB-480.20120223_EMB-570.20120223_EMB-600
	# IN THIS SET, leaving out the 4cell series, and adding in L1 after the final set
	logFC >=0 , p<=0.05=================================================						logFC >=1 , p<=0.05================================================
80	minutes
	down	fraction down	zero	fraction zero	up	fraction up	down	fraction down	zero	fraction zero	up	fraction up
	1321	0.14	6179	0.65	1945	0.21	1320	0.14	6180	0.65	1945	0.21	20120223_EMB-0.20120223_EMB-30.20120223_EMB-90.20120411_EMB-60
	1067	0.11	8154	0.82	675	0.07	1067	0.11	8154	0.82	675	0.07	20120223_EMB-90.20120411_EMB-60.20120411_EMB-120.20120223_EMB-180
	1136	0.12	7870	0.81	694	0.07	892	0.09	8304	0.86	504	0.05	20120411_EMB-120.20120223_EMB-180.20120223_EMB-240.20120223_EMB-270
	726	0.07	7853	0.76	1739	0.17	374	0.04	8438	0.82	1506	0.15	20120223_EMB-240.20120223_EMB-270.20120419_EMB-270.20120223_EMB-330
	409	0.04	9089	0.82	1620	0.15	357	0.03	9188	0.83	1573	0.14	20120419_EMB-270.20120223_EMB-330.20120419_EMB-330.20120223_EMB-420
	401	0.03	10200	0.83	1748	0.14	357	0.03	10304	0.83	1688	0.14	20120419_EMB-330.20120223_EMB-420.20120223_EMB-480.20120419_EMB-420
	840	0.07	10780	0.84	1278	0.1	458	0.04	11389	0.88	1051	0.08	20120223_EMB-480.20120419_EMB-420.20120223_EMB-570.20120223_EMB-600
	3393	0.25	6777	0.49	3585	0.26	3321	0.24	6942	0.5	3492	0.25	20120223_EMB-570.20120223_EMB-600.L1.N2_L1-1
100	minutes
	down	fraction down	zero	fraction zero	up	fraction up	down	fraction down	zero	fraction zero	up	fraction up
	1808	0.19	5423	0.56	2381	0.25	1785	0.19	5453	0.57	2374	0.25	20120223_EMB-0.20120223_EMB-30.20120411_EMB-60.20120419_EMB-90
	1245	0.12	8184	0.81	629	0.06	1245	0.12	8184	0.81	629	0.06	20120411_EMB-60.20120419_EMB-90.20120411_EMB-150.20120223_EMB-210
	916	0.09	7856	0.76	1572	0.15	756	0.07	8107	0.78	1481	0.14	20120411_EMB-150.20120223_EMB-210.20120411_EMB-240.20120223_EMB-300
	662	0.06	8718	0.79	1681	0.15	536	0.05	8945	0.81	1580	0.14	20120411_EMB-240.20120223_EMB-300.20120223_EMB-390.20120419_EMB-330
	640	0.05	9709	0.79	2018	0.16	493	0.04	9938	0.8	1936	0.16	20120223_EMB-390.20120419_EMB-330.20120223_EMB-480.20120419_EMB-420
	840	0.07	10780	0.84	1278	0.1	458	0.04	11389	0.88	1051	0.08	20120223_EMB-480.20120419_EMB-420.20120223_EMB-570.20120223_EMB-600
	3393	0.25	6777	0.49	3585	0.26	3321	0.24	6942	0.5	3492	0.25	20120223_EMB-570.20120223_EMB-600.L1.N2_L1-1
120	minutes
	down	fraction down	zero	fraction zero	up	fraction up	down	fraction down	zero	fraction zero	up	fraction up
	2401	0.25	4288	0.45	2875	0.3	2023	0.21	4864	0.51	2677	0.28	20120223_EMB-0.20120223_EMB-30.20120223_EMB-120.20120411_EMB-90
	1828	0.18	6624	0.66	1586	0.16	1595	0.16	7140	0.71	1303	0.13	20120223_EMB-120.20120411_EMB-90.20120223_EMB-240.20120223_EMB-270
	2367	0.22	5324	0.49	3079	0.29	1091	0.1	7109	0.66	2570	0.24	20120223_EMB-240.20120223_EMB-270.20120419_EMB-300.20120223_EMB-390
	1526	0.12	7855	0.64	2965	0.24	810	0.07	8825	0.71	2711	0.22	20120419_EMB-300.20120223_EMB-390.20120223_EMB-480.20120419_EMB-420
	426	0.03	11185	0.84	1770	0.13	426	0.03	11185	0.84	1770	0.13	20120223_EMB-480.20120419_EMB-420.20120223_EMB-600.20120411_EMB-600
	2331	0.17	9329	0.68	2059	0.15	2331	0.17	9329	0.68	2059	0.15	20120223_EMB-600.20120411_EMB-600.L1.N2_L1-1
	LIFE STAGES
	logFC >=0 , p<=0.05=================================================						logFC >=1 , p<=0.05================================================
	down	fraction down	zero	fraction zero	up	fraction up	down	fraction down	zero	fraction zero	up	fraction up
	829	0.06	10678	0.8	1765	0.13	829	0.06	10678	0.8	1765	0.13	L1.N2_L1-1.L2.N2_L2-4
	1367	0.1	11160	0.79	1533	0.11	1362	0.1	11168	0.79	1530	0.11	L2.N2_L2-4.L3.N2_L3-1
	695	0.05	11610	0.81	1948	0.14	695	0.05	11610	0.81	1948	0.14	L3.N2_L3-1.L4.L4b
	2136	0.15	11020	0.79	775	0.06	2136	0.15	11020	0.79	775	0.06	L4.L4b.YA.N2_Yad-1
	4341	0.33	5175	0.4	3446	0.27	3570	0.28	7302	0.56	2090	0.16	YA.N2_Yad-1.AdultSPE9.AdultSPE9b
	OTHER LIFE STAGE COMBINATIONS INCLUDING DAUER
	logFC >=0 , p<=0.05=================================================						logFC >=1 , p<=0.05================================================
	down	fraction down	zero	fraction zero	up	fraction up	down	fraction down	zero	fraction zero	up	fraction up
	2287	0.16	8996	0.65	2589	0.19	2273	0.16	9019	0.65	2580	0.19	L2.N2_L2-4.DauerEntryDAF2.DauerEntryDAF2-1-1
	3001	0.22	8119	0.6	2317	0.17	2647	0.2	9044	0.67	1746	0.13	DauerEntryDAF2.DauerEntryDAF2-1-1.DauerDAF2-2-1.DauerDAF2-5-1
	1403	0.11	9971	0.76	1685	0.13	675	0.05	11426	0.87	958	0.07	DauerDAF2-2-1.DauerDAF2-5-1.DauerExitDAF2-3-1.DauerExitDAF2-6-1
	4389	0.29	7158	0.48	3454	0.23	4389	0.29	7158	0.48	3454	0.23	L4.L4b.DauerExitDAF2-3-1.DauerExitDAF2-6-1
	4243	0.31	5361	0.39	4290	0.31	4123	0.3	5547	0.4	4224	0.3	DauerExitDAF2-3-1.DauerExitDAF2-6-1.L4JK1107soma.L4JK1107soma-2
	3297	0.22	6478	0.43	5226	0.35	3172	0.21	6663	0.44	5166	0.34	DauerExitDAF2-3-1.DauerExitDAF2-6-1.L4MALE.L4MALE5
	3511	0.24	6427	0.43	4899	0.33	3453	0.23	6507	0.44	4877	0.33	YA.N2_Yad-1.L4MALE.L4MALE5
	2816	0.2	8670	0.62	2535	0.18	2735	0.2	8887	0.63	2399	0.17	L3.N2_L3-1.YA.N2_Yad-1
	2627	0.19	8557	0.63	2336	0.17	2624	0.19	8561	0.63	2335	0.17	L3.N2_L3-1.L4JK1107soma.L4JK1107soma-2
	4272	0.32	5231	0.39	4048	0.3	4261	0.31	5250	0.39	4040	0.3	YA.N2_Yad-1.L4JK1107soma.L4JK1107soma-2
	1294	0.09	10347	0.69	3301	0.22	1294	0.09	10347	0.69	3301	0.22	L3.N2_L3-1.L4MALE.L4MALE5
	3511	0.24	6427	0.43	4899	0.33	3453	0.23	6507	0.44	4877	0.33	YA.N2_Yad-1.L4MALE.L4MALE5

## Sheet: UP and DOWN by common name
using the 80 minute set without the 4cell, top 20 DOWN regulated genes per sample by common name p<=0.05, logFC>=1																		using the 80 minute set without the 4cell, top 20 DOWN regulated genes per sample by common name p<=0.05, logFC>2
20120223_EMB-0.20120223_EMB-30.20120223_EMB-90.20120411_EMB-60		20120223_EMB-90.20120411_EMB-60.20120411_EMB-120.20120223_EMB-180		20120411_EMB-120.20120223_EMB-180.20120223_EMB-240.20120223_EMB-270		20120223_EMB-240.20120223_EMB-270.20120419_EMB-270.20120223_EMB-330		20120419_EMB-270.20120223_EMB-330.20120419_EMB-330.20120223_EMB-420		20120419_EMB-330.20120223_EMB-420.20120223_EMB-480.20120419_EMB-420		20120223_EMB-480.20120419_EMB-420.20120223_EMB-570.20120223_EMB-600		20120223_EMB-570.20120223_EMB-600.L1.N2_L1-1				20120223_EMB-0.20120223_EMB-30.20120223_EMB-90.20120411_EMB-60		20120223_EMB-90.20120411_EMB-60.20120411_EMB-120.20120223_EMB-180		20120411_EMB-120.20120223_EMB-180.20120223_EMB-240.20120223_EMB-270		20120223_EMB-240.20120223_EMB-270.20120419_EMB-270.20120223_EMB-330		20120419_EMB-270.20120223_EMB-330.20120419_EMB-330.20120223_EMB-420		20120419_EMB-330.20120223_EMB-420.20120223_EMB-480.20120419_EMB-420		20120223_EMB-480.20120419_EMB-420.20120223_EMB-570.20120223_EMB-600		20120223_EMB-570.20120223_EMB-600.L1.N2_L1-1
tag	14	fbxb	19	fbxb	81	fbxb	37	his	45	his	47	let	8	col	72			puf	6	sdz	12	fbxb	65	fbxb	15	col	11	his	5	sma	1	col	71
unc	10	sdz	16	col	33	sdz	8	col	13	fbxb	8	tag	7	his	57			nhr	5	tbx	11	col	32	col	5	his	1	ins	1	nlp	1	his	56
set	7	fbxa	12	sdz	24	fbxc	8	fbxb	8	nhr	5	unc	5	nhr	36			sqv	4	fbxa	11	sdz	20	sdz	4	Y82E9BR.17	1	fbxb	1	msh	1	fbxb	27
nhr	7	tbx	11	fbxc	14	skr	7	fbxc	6	ugt	4	pqn	5	unc	28			mex	4	bath	7	fbxc	12	skr	3	Y57A10C.1	1	dsl	1	lam	1	nhr	24
dnj	7	tag	9	skr	10	mcm	5	mcm	5	lin	4	dpy	4	fbxb	27			him	4	hsp	6	skr	9	fbxc	3	Y51H4A.4	1	cutl	1	kbp	1	cutl	17
puf	6	bath	8	fbxa	7	col	5	hcp	5	fbxc	4	cutl	4	tag	23			gld	4	clec	6	nlp	5	btb	3	Y45G5AM.5	1	che	1	gst	1	grl	15
ztf	5	fbxc	7	nlp	6	tbx	4	sdz	4	kbp	3	clec	4	cutl	22			egg	4	hlh	5	grl	5	tbx	2	Y116F11A.1_helicase	1	Y57A10C.11	1	fbxb	1	fbxa	13
sqv	5	pbs	6	his	6	his	4	tbx	3	hlh	3	cdh	4	pqn	20			cpg	4	fbxc	5	btb	5	sepa	1	W08F4.12	1	T28C6.10	1	cdh	1	ptr	12
sel	5	hsp	6	btb	6	pes	3	skr	3	hcp	3	vab	3	ceh	19			unc	3	fbxb	5	tbx	4	rol	1	T25E12.6	1	R04A9.9	1	Y66A7A.3	1	pqn	12
pas	5	clec	6	tbx	5	hil	3	lin	3	cdk	3	ptr	3	fbxa	18			arrd	3	tag	4	pes	4	nlp	1	R04A9.7	1	K08B4.2	1	Y57E12AL.2	1	msp	12
par	5	skr	5	rgs	5	crn	3	knl	3	ztf	2	lam	3	grl	15			ztf	2	pqn	4	fbxa	4	nhr	1	K08H2.7	1	F56H9.8	1	Y52B11B.1	1	dpy	12
him	5	hlh	5	grl	5	ceh	3	unc	2	unc	2	fbxa	3	ptr	14			zim	2	ttr	3	vet	3	hil	1	F55C9.14	1	F47G4.6	1	Y47D3B.4	1	tag	11
egg	5	set	4	ceh	5	btb	3	set	2	ttr	2	ceh	3	ttr	13			tag	2	skr	3	rgs	2	end	1	F55C9.11	1	F44A6.3	1	Y43F4A.3	1	str	11
daf	5	rgs	4	rpl	4	vet	2	sas	2	skr	2	xrn	2	nas	13			plk	2	fkh	3	nhr	2	cut	1	F49B2.3	1	F22E5.7	1	Y22D7AL.9	1	nas	11
ubc	4	puf	4	pes	4	ugt	2	rpa	2	rfc	2	ugt	2	msp	12			pgl	2	ztf	2	ins	2	cpr	1	F44E7.2_nitrophenylphosphatase	1	C47E12.13	1	W08F4.5	1	clec	11
tbc	4	pqn	4	flp	4	snr	2	rnr	2	pri	2	srxa	2	hlh	12			pas	2	syp	2	flp	2	ceh	1	F42G4.6	1	C01G10.5	1	W04H10.1	1	grd	9
mex	4	pas	4	vet	3	set	2	rfc	2	flh	2	srg	2	dpy	12			oma	2	str	2	fkh	2	Y82E9BL.6	1	F31D5.6	1			W01B6.4	1	fbxc	9
lin	4	mdt	4	ugt	3	pri	2	pri	2	fbxa	2	par	2	clec	12			mrp	2	srh	2	dsl	2	Y51H4A.4	1	F23D12.5	1			T02H6.6	1	ceh	9
let	4	fkh	4	set	3	nhr	2	nhr	2	cyb	2	noah	2	str	11			lin	2	scl	2	ceh	2	Y39G10AL.1	1	F23D12.4	1			K01A6.8	1	oac	8
gld	4	ztf	3	pqn	3	math	2	klp	2	clec	2	nlp	2	fbxc	10			inx	2	pgl	2	ccch	2	Y37D8A.8	1	F16H6.7	1			F52F10.1	1	hlh	8
using the 80 minute set without the 4cell, top 20 UP regulated genes per sample by common name p<=0.05, logFC>=1																		using the 80 minute set without the 4cell, top 20 UP regulated genes per sample by common name p<=0.05, logFC>=2
20120223_EMB-0.20120223_EMB-30.20120223_EMB-90.20120411_EMB-60		20120223_EMB-90.20120411_EMB-60.20120411_EMB-120.20120223_EMB-180		20120411_EMB-120.20120223_EMB-180.20120223_EMB-240.20120223_EMB-270		20120223_EMB-240.20120223_EMB-270.20120419_EMB-270.20120223_EMB-330		20120419_EMB-270.20120223_EMB-330.20120419_EMB-330.20120223_EMB-420		20120419_EMB-330.20120223_EMB-420.20120223_EMB-480.20120419_EMB-420		20120223_EMB-480.20120419_EMB-420.20120223_EMB-570.20120223_EMB-600		20120223_EMB-570.20120223_EMB-600.L1.N2_L1-1				20120223_EMB-0.20120223_EMB-30.20120223_EMB-90.20120411_EMB-60		20120223_EMB-90.20120411_EMB-60.20120411_EMB-120.20120223_EMB-180		20120411_EMB-120.20120223_EMB-180.20120223_EMB-240.20120223_EMB-270		20120223_EMB-240.20120223_EMB-270.20120419_EMB-270.20120223_EMB-330		20120419_EMB-270.20120223_EMB-330.20120419_EMB-330.20120223_EMB-420		20120419_EMB-330.20120223_EMB-420.20120223_EMB-480.20120419_EMB-420		20120223_EMB-480.20120419_EMB-420.20120223_EMB-570.20120223_EMB-600		20120223_EMB-570.20120223_EMB-600.L1.N2_L1-1
fbxb	95	col	25	nhr	16	nhr	30	unc	22	col	42	col	73	clec	52			fbxb	66	col	23	nhr	3	col	13	pqn	6	col	31	col	57	clec	46
his	50	unc	23	unc	15	unc	28	pqn	15	unc	25	flp	19	rpl	37			his	36	ceh	9	tag	2	ttr	7	wrt	5	ttr	8	hsp	7	nlp	30
sdz	22	ceh	13	tag	8	col	20	ttr	14	nlp	20	nlp	18	nlp	36			ugt	14	unc	8	sqt	2	hsp	7	ttr	5	pqn	8	ttr	5	rpl	28
fbxc	21	nhr	11	inx	6	ttr	13	tag	14	clec	20	ttr	16	tag	27			sdz	14	nhr	8	fbxa	2	unc	6	grl	4	nlp	8	flp	5	rps	26
rpl	19	tag	9	dpy	6	tag	11	nhr	13	flp	17	fbxa	12	rps	27			fbxc	14	inx	4	ugt	1	lpr	6	col	4	flp	8	nlp	4	ttr	21
rps	17	dpy	7	cutl	6	cutl	10	ptr	10	pqn	16	clec	12	ugt	26			ceh	14	grl	4	srt	1	tag	5	spp	3	unc	7	pqn	3	flp	21
ceh	17	let	6	ceh	6	ptr	9	nlp	9	nhr	13	pqn	9	flp	25			nhr	13	dpy	4	srr	1	spp	5	nlp	3	nas	7	grd	3	fbxa	21
tag	15	ztf	5	ptr	5	hsp	9	cutl	9	ttr	12	nas	8	fbxa	25			ttr	10	cutl	4	pdl	1	gst	5	gst	3	clec	7	cnc	3	ugt	19
ugt	14	vab	5	let	5	clec	9	col	9	twk	11	hsp	8	ttr	22			clec	9	tsp	3	nlp	1	nhr	4	glb	3	glb	6	abu	3	col	18
unc	13	lin	5	ugt	4	ceh	7	spp	8	lgc	11	grl	7	nhr	22			skr	8	tag	3	nekl	1	cutl	4	clec	3	oac	5	msp	2	ins	14
nhr	13	inx	5	sqt	3	spp	6	twk	7	grl	11	grd	7	col	21			nlp	8	sym	3	lntl	1	twk	3	unc	2	lgc	5	irg	2	cyp	13
skr	12	cutl	5	nhx	3	pqn	6	lpr	7	oac	8	spp	6	gst	19			rpl	7	let	3	lin	1	ptr	3	twk	2	grl	5	grl	2	nhr	11
ttr	10	grl	4	lpr	3	lpr	6	lgc	7	nas	8	vha	4	glb	18			unc	6	ztf	2	lgc	1	pqn	3	tag	2	twk	4	dpy	2	gst	11
nlp	9	egl	4	gei	3	lin	6	hot	7	gst	8	rgs	4	cyp	18			tag	6	ugt	2	lec	1	osm	3	ptr	2	ptr	4	cpr	2	glb	11
clec	9	ttr	3	egl	3	lgc	6	egl	7	glb	8	puf	4	dhs	16			fbxa	6	ttr	2	hlh	1	lgc	3	phat	2	phat	4	clec	2	fipr	11
fbxa	8	tsp	3	dyf	3	fbxa	6	clec	7	tag	7	phat	4	ins	15			hlh	5	ptr	2	haf	1	lec	3	myo	2	nhr	4	tag	1	dhs	11
dhs	8	sym	3	cyp	3	egl	6	grl	6	ptr	7	lgc	4	pqn	13			dhs	5	oac	2	haao	1	hum	3	lips	2	gst	4	ssp	1	nspc	9
lin	6	sma	3	tsp	2	dyf	6	dyf	6	mec	7	lec	4	spp	12			cutl	5	noah	2	gpdh	1	cut	3	lec	2	grd	4	srb	1	tag	8
hlh	6	ptr	3	syg	2	tsp	5	wrt	5	grd	7	gst	4	lgc	11			acs	5	nlp	2	folt	1	clec	3	hlh	2	fip	4	sqt	1	spp	8
gst	6	mig	3	set	2	lec	5	inx	5	gcy	7	cnc	4	fipr	11			vab	4	nhx	2	dsl	1	che	3	grd	2	acr	4	spp	1	pqn	8
																		[...]				[...]				[...]				[...]		[...]
																								[...]
[...]																		[...]								[...]
[...]
[...]
[...]
[...]
[...]
[...]

## Sheet: Top20 UP DOWN gene names
80 minutes without 4cell, choosing logFC >1 and p<=0.05 lists of specific genes, sorted by logFC top 20 down regulated
column	1	=	logFC
column	2	=	logCPM
column	3	=	p-value
Column	4	=	FDR
column	5	=	transcript,	common	name,	GO	classification
20120223_EMB-0.20120223_EMB-30.20120223_EMB-90.20120411_EMB-60
	logFC	logCPM	p-value	FDR	Symbol
	-6.53	9.6	5.47724e-08	1.43686e-05	C17E4.3#C17E4.3#GO:_C17E4.3#C17E4.3#GO:
	-5.97	8.63	6.90883e-05	0.0014215	C17E4.11#C17E4.11#GO:_C17E4.11#C17E4.11#GO:
	-5.9	8.12	0.00012038	0.00207509	C17E4.4#C17E4.4#GO:_C17E4.4#C17E4.4#GO:
	-5.24	-0.86	0.00179584	0.0143374	Y48G1BL.6#Y48G1BL.6#GO:_Y48G1BL.6#Y48G1BL.6#GO:
	-3.99	2.86	0.00035297	0.00436887	D1014.2#D1014.2#GO:_D1014.2#D1014.2#GO:
	-3.82	5.66	5.57035e-11	1.06268e-07	Y17G9B.9#Y17G9B.9#GO:_Y17G9B.9#Y17G9B.9#GO:
	-3.78	1.46	0.00153499	0.0127834	ZC317.7#ZC317.7#GO:_ZC317.7#ZC317.7#GO:
	-3.77	8.84	0.00163168	0.0133764	M142.1#unc-119#GO:0000003:0007631:0007635:0010171:0030424:0030517:0040011:0040024:0042384:0043051:0046662_M142.1#unc-119#GO:0000003:0007631:0007635:0010171:0030424:0030517:0040011:0040024:0042384:0043051:0046662
	-3.75	4.95	0.00788528	0.0404501	E04F6.11#clh-3_Chloride_channel_protein#GO:0003824:0005216:0005247:0005886:0006821:0016020:0030554:0055085_E04F6.11#clh-3_Chloride_channel_protein#GO:0003824:0005216:0005247:0005886:0006821:0016020:0030554:0055085
	-3.69	9.12	1.17266e-07	2.26012e-05	ZC513.6#oma-2_zinc_finger_protein#GO:0001556:0005737:0005813:0043186:0046872_ZC513.6#oma-2_zinc_finger_protein#GO:0001556:0005737:0005813:0043186:0046872
	-3.68	8.73	6.56962e-06	0.000289923	B0280.5#cpg-2#GO:0005576:0006030:0008061:0030703:0032465_B0280.5#cpg-2#GO:0005576:0006030:0008061:0030703:0032465
	-3.61	2.34	0.00202286	0.0156846	F31F6.3#F31F6.3_worm-specific_member_of_protein_family#GO:_F31F6.3#F31F6.3_worm-specific_member_of_protein_family#GO:
	-3.54	6.51	6.00067e-06	0.00027377	T11F8.3#rme-2_LDL-like_receptor#GO:0005041:0005509:0005515:0005886:0005887:0009792:0010008:0030728:0031410:0048599_T11F8.3#rme-2_LDL-like_receptor#GO:0005041:0005509:0005515:0005886:0005887:0009792:0010008:0030728:0031410:0048599
	-3.45	9.17	2.37029e-07	3.66967e-05	W05F2.3#W05F2.3#GO:_W05F2.3#W05F2.3#GO:
	-3.4	7.48	5.4329e-07	6.33436e-05	Y73B6BL.38#puf-11#GO:0003723:0005488_Y73B6BL.38#puf-11#GO:0003723:0005488
	-3.39	4.11	1.15781e-05	0.000421313	F23D12.2#F23D12.2#GO:_F23D12.2#F23D12.2#GO:
	-3.39	4.41	5.89864e-07	6.63176e-05	T01H3.4#T01H3.4#GO:_T01H3.4#T01H3.4#GO:
	-3.38	8.48	1.69209e-06	0.000128872	K07A12.2#K07A12.2_Rat_insulin-like_growth_factor_binding_protien_complex_acid_labile_chain_like#GO:_K07A12.2#K07A12.2_Rat_insulin-like_growth_factor_binding_protien_complex_acid_labile_chain_like#GO:
	-3.37	4.41	4.61842e-06	0.000232147	Y66D12A.16#Y66D12A.16#GO:_Y66D12A.16#Y66D12A.16#GO:
	-3.37	6.97	1.22783e-08	5.52174e-06	F32D1.6#F32D1.6#GO:_F32D1.6#F32D1.6#GO:
[...]
20120223_EMB-90.20120411_EMB-60.20120411_EMB-120.20120223_EMB-180
	logFC	logCPM	p-value	FDR	Symbol
	-10.32	0.96	2.60675e-05	0.00204712	AC3.1#sri-20_7TM_chemoreceptor_sri_family#GO:_AC3.1#sri-20_7TM_chemoreceptor_sri_family#GO:
	-10.14	0.81	1.31212e-05	0.00122051	F56F4.1#ttr-58#GO:0005615_F56F4.1#ttr-58#GO:0005615
	-10.03	0.66	0.000225519	0.00890504	Y48C3A.1#Y48C3A.1#GO:_Y48C3A.1#Y48C3A.1#GO:
	-9.58	0.24	0.000101857	0.00536103	F20G2.5#F20G2.5#GO:_F20G2.5#F20G2.5#GO:
	-9.53	0.17	0.000231572	0.00891597	T24D3.1#med-1_GLN3_like#GO:0001714:0003700:0006355:0008270:0043565:0060465_T24D3.1#med-1_GLN3_like#GO:0001714:0003700:0006355:0008270:0043565:0060465
	-9.42	0.11	8.17694e-05	0.00452016	C14C10.7#ttr-43#GO:0005615_C14C10.7#ttr-43#GO:0005615
	-9.3	-0.08	0.000695755	0.0188616	F46B3.23#F46B3.23#GO:_F46B3.23#F46B3.23#GO:
	-8.99	-0.41	0.00534453	0.0737363	C31B8.4#C31B8.4#GO:_C31B8.4#C31B8.4#GO:
	-8.96	-0.38	0.000457393	0.014839	T08B1.5#fbxa-201#GO:_T08B1.5#fbxa-201#GO:
	-8.96	-0.45	0.00552842	0.0748341	T13C5.7#T13C5.7#GO:_T13C5.7#T13C5.7#GO:
	-8.69	-0.7	0.00231581	0.0418155	C39B5.7#fbxa-12#GO:0005515_C39B5.7#fbxa-12#GO:0005515
	-8.66	-0.6	0.000424967	0.0140357	F31A3.4#hlh-29#GO:0046983_F31A3.4#hlh-29#GO:0046983
	-8.61	-0.73	0.000993575	0.0243352	F47H4.11#fbxa-134#GO:_F47H4.11#fbxa-134#GO:
	-8.48	-0.92	0.00842032	0.0969954	Y26D4A.6#clec-108#GO:0030246_Y26D4A.6#clec-108#GO:0030246
	-8.36	-1.04	0.00948958	0.104227	T07D10.3#T07D10.3_zinc_finger_protein#GO:_T07D10.3#T07D10.3_zinc_finger_protein#GO:
	-8.31	-1.09	0.00985269	0.106889	F59A3.13#F59A3.13#GO:_F59A3.13#F59A3.13#GO:
	-8.2	-1.2	0.0107986	0.113169	ZK488.7#pqn-98#GO:_ZK488.7#pqn-98#GO:
	-8.16	-1.11	0.00153886	0.0326062	Y68A4A.13#Y68A4A.13#GO:_Y68A4A.13#Y68A4A.13#GO:
	-7.9	-1.45	0.00525798	0.0726644	R102.9#glb-21#GO:0005506:0015671:0019825:0020037_R102.9#glb-21#GO:0005506:0015671:0019825:0020037
	-7.88	-1.39	0.00272839	0.0466276	Y62H9A.8#Y62H9A.8#GO:_Y62H9A.8#Y62H9A.8#GO:
[...]
20120411_EMB-120.20120223_EMB-180.20120223_EMB-240.20120223_EMB-270
	-10.23	0.47	1.34323e-07	8.98483e-06	D1086.19#D1086.19#GO:_D1086.19#D1086.19#GO:
	-9.46	-0.5	1.02214e-05	0.000431034	T08B6.1#T08B6.1#GO:_T08B6.1#T08B6.1#GO:
	-9.29	-0.53	1.34362e-06	7.32125e-05	Y38E10A.3#Y38E10A.3#GO:_Y38E10A.3#Y38E10A.3#GO:
	-9.17	0.03	6.98248e-05	0.00223508	Y51H4A.9#col-137#GO:0042302_Y51H4A.9#col-137#GO:0042302
	-8.88	-0.24	0.000106034	0.00310165	E02A10.2#grl-23#GO:_E02A10.2#grl-23#GO:
	-8.73	-0.44	1.22915e-05	0.000507301	C10F3.7#C10F3.7#GO:_C10F3.7#C10F3.7#GO:
	-8.7	-1.3	3.71442e-05	0.00131482	Y46G5A.34#Y46G5A.34#GO:_Y46G5A.34#Y46G5A.34#GO:
	-8.69	2.14	3.60441e-13	1.29478e-10	C05D12.4#C05D12.4#GO:_C05D12.4#C05D12.4#GO:
	-8.6	-1.35	2.71221e-05	0.00100404	R12E2.15#R12E2.15#GO:_R12E2.15#R12E2.15#GO:
	-7.79	-2.01	0.000131811	0.00372723	C43D7.4#C43D7.4#GO:_C43D7.4#C43D7.4#GO:
	-7.63	-2.51	0.00237932	0.03364	R160.4#R160.4#GO:_R160.4#R160.4#GO:
	-7.53	-2.58	0.0026619	0.0366729	Y80D3A.10#nlp-42#GO:_Y80D3A.10#nlp-42#GO:
	-7.48	-2.01	0.000115152	0.00331412	Y64G10A.10#Y64G10A.10#GO:_Y64G10A.10#Y64G10A.10#GO:
	-7.43	1.14	5.14893e-05	0.00173401	W05G11.3#col-88_cuticular_collagen#GO:0042302_W05G11.3#col-88_cuticular_collagen#GO:0042302
	-6.92	1.47	3.83551e-08	2.88377e-06	Y82E9BL.5#Y82E9BL.5#GO:_Y82E9BL.5#Y82E9BL.5#GO:
	-6.78	-0.89	3.76623e-06	0.000178189	T22B2.2#T22B2.2#GO:_T22B2.2#T22B2.2#GO:
	-6.52	4.26	6.05498e-17	8.38961e-14	F19F10.5#F19F10.5_DNA-binding_protein#GO:_F19F10.5#F19F10.5_DNA-binding_protein#GO:
	-6.23	0.72	6.14768e-07	3.59195e-05	C05D12.5#C05D12.5#GO:_C05D12.5#C05D12.5#GO:
	-6.09	2.87	1.7866e-11	3.85072e-09	B0563.8#B0563.8#GO:_B0563.8#B0563.8#GO:
	-6.08	-1.34	5.05354e-05	0.00171379	C06A1.6#C06A1.6#GO:_C06A1.6#C06A1.6#GO:
[...]
20120223_EMB-240.20120223_EMB-270.20120419_EMB-270.20120223_EMB-330
	-6.03	-2.76	0.00339955	0.0294042	C16C4.17#C16C4.17#GO:_C16C4.17#C16C4.17#GO:
	-4.6	0.38	6.25175e-05	0.00135788	Y56A3A.10#fbxb-22#GO:0005515_Y56A3A.10#fbxb-22#GO:0005515
	-4.07	-0.36	0.00042802	0.00594331	F23A7.1#F23A7.1#GO:_F23A7.1#F23A7.1#GO:
	-3.82	2.7	3.50927e-10	9.52767e-08	T22B7.3#T22B7.3#GO:_T22B7.3#T22B7.3#GO:
	-3.71	1.66	0.00350017	0.0300927	ZC513.8#col-43_cuticualr_collagen#GO:0042302_ZC513.8#col-43_cuticualr_collagen#GO:0042302
	-3.59	1.35	0.000253269	0.00396507	K05F6.3#fbxb-51#GO:_K05F6.3#fbxb-51#GO:
	-3.55	3.82	3.70392e-11	1.66145e-08	Y39G10AL.1#Y39G10AL.1#GO:_Y39G10AL.1#Y39G10AL.1#GO:
	-3.53	2.09	4.20567e-08	4.51978e-06	F35E2.2#F35E2.2#GO:_F35E2.2#F35E2.2#GO:
	-3.48	-0.06	0.00282102	0.025688	C27H5.5#col-36_cuticular_collagen#GO:0042302_C27H5.5#col-36_cuticular_collagen#GO:0042302
	-3.44	0.67	0.00406042	0.033513	C47G2.1#cut-1_cuticulin#GO:0060102_C47G2.1#cut-1_cuticulin#GO:0060102
	-3.34	-0.79	0.00515789	0.0403748	T06E4.4#col-147_collagen#GO:0042302_T06E4.4#col-147_collagen#GO:0042302
	-3.25	0.32	0.00025991	0.00400799	C10C5.4#C10C5.4_aminoacylase-1#GO:_C10C5.4#C10C5.4_aminoacylase-1#GO:
	-3.23	-1.06	0.00419117	0.0343996	K05C4.8#K05C4.8#GO:_K05C4.8#K05C4.8#GO:
	-3.22	3.88	1.13362e-07	9.74632e-06	T04D3.2#sdz-30#GO:_T04D3.2#sdz-30#GO:
	-3.11	0.15	0.000943652	0.0108294	Y82E9BL.6#Y82E9BL.6#GO:_Y82E9BL.6#Y82E9BL.6#GO:
	-3.07	1.53	6.38417e-05	0.00137309	F45C12.6#btb-8#GO:0005515_F45C12.6#btb-8#GO:0005515
	-2.92	1.34	0.000489503	0.00656724	T11A5.5#sdz-31#GO:_T11A5.5#sdz-31#GO:
	-2.89	1.27	0.000108201	0.00205962	ZK1320.10#nlp-11#GO:_ZK1320.10#nlp-11#GO:
	-2.85	1.76	0.0387992	0.175259	T05A1.2#col-122_collagen#GO:0042302_T05A1.2#col-122_collagen#GO:0042302
	-2.85	-0.66	0.00485503	0.0386194	F43G6.10#F43G6.10#GO:_F43G6.10#F43G6.10#GO:
[...]
20120419_EMB-270.20120223_EMB-330.20120419_EMB-330.20120223_EMB-420
	-6.7	-0.45	7.71792e-08	3.9e-05	C50B6.4#col-161_collagen#GO:0042302_C50B6.4#col-161_collagen#GO:0042302
	-5.49	-3.32	0.0198525	0.149425	F42G4.6#F42G4.6#GO:_F42G4.6#F42G4.6#GO:
	-4.82	-1.45	7.38504e-05	0.0040675	Y2H9A.3#col-162#GO:0042302_Y2H9A.3#col-162#GO:0042302
	-4.41	-1.36	6.57729e-05	0.00384841	ZK131.2#his-25_histone_H3#GO:0000786:0003677:0006334:0046982_ZK131.2#his-25_histone_H3#GO:0000786:0003677:0006334:0046982
	-3.63	-0.35	0.00105111	0.0231662	F16H6.7#F16H6.7#GO:_F16H6.7#F16H6.7#GO:
	-3.42	1.1	0.000297488	0.0103902	F15H10.2#col-13_collagen#GO:0042302_F15H10.2#col-13_collagen#GO:0042302
	-3.17	-1.36	0.00425608	0.0574906	T11F9.9#col-157_collagen#GO:0042302_T11F9.9#col-157_collagen#GO:0042302
	-3.13	-0.93	0.00835885	0.0881567	C55C2.1#C55C2.1_zinc-finger_scrt-1_transcription_factor#GO:_C55C2.1#C55C2.1_zinc-finger_scrt-1_transcription_factor#GO:
	-3	-1.23	0.00224615	0.0384669	C24H12.10#C24H12.10#GO:_C24H12.10#C24H12.10#GO:
	-2.99	-1.83	0.0186283	0.143543	T10E10.5#col-169_collagen#GO:0042302_T10E10.5#col-169_collagen#GO:0042302
	-2.86	-1.56	0.00255899	0.0418357	F55C10.3#col-155_collagen#GO:0042302_F55C10.3#col-155_collagen#GO:0042302
	-2.85	1.38	6.36346e-05	0.00380336	W05B2.1#col-94#GO:0042302_W05B2.1#col-94#GO:0042302
	-2.72	5.11	2.31484e-07	8.0419e-05	Y51H4A.4#Y51H4A.4#GO:0003700:0006355:0043565_Y51H4A.4#Y51H4A.4#GO:0003700:0006355:0043565
	-2.63	-0.24	0.0110431	0.103951	B0222.6#col-144#GO:0042302_B0222.6#col-144#GO:0042302
	-2.58	-0.25	0.00271729	0.0430307	F09G8.6#col-91_Cuticle_collagen#GO:0042302_F09G8.6#col-91_Cuticle_collagen#GO:0042302
	-2.56	-0.87	0.00564195	0.0684733	K08H2.7#K08H2.7#GO:_K08H2.7#K08H2.7#GO:
	-2.48	-1.35	0.00753877	0.08257	D1079.1#D1079.1#GO:_D1079.1#D1079.1#GO:
	-2.4	-0.22	0.0212902	0.155508	F55C9.14#F55C9.14#GO:_F55C9.14#F55C9.14#GO:
	-2.39	-0.78	0.0343255	0.211998	F23D12.4#F23D12.4#GO:_F23D12.4#F23D12.4#GO:
	-2.18	0.3	0.00522063	0.0652109	Y116F11A.1#Y116F11A.1_helicase#GO:_Y116F11A.1#Y116F11A.1_helicase#GO:
[...]
20120419_EMB-330.20120223_EMB-420.20120223_EMB-480.20120419_EMB-420
	-3.01	0.16	0.000999318	0.0255478	T28C6.10#T28C6.10#GO:_T28C6.10#T28C6.10#GO:
	-2.7	4.3	0.000110767	0.00666472	ZK75.2#ins-2_ins_family#GO:0005179:0005576_ZK75.2#ins-2_ins_family#GO:0005179:0005576
	-2.49	5.15	9.05191e-06	0.00124192	Y53C12B.6#cutl-2#GO:_Y53C12B.6#cutl-2#GO:
	-2.4	-1.21	0.011229	0.113373	F56H9.8#F56H9.8#GO:_F56H9.8#F56H9.8#GO:
	-2.34	5.1	6.57955e-06	0.000978846	K08B4.2#K08B4.2#GO:_K08B4.2#K08B4.2#GO:
	-2.29	-0.85	0.0187248	0.157317	F22E5.7#F22E5.7#GO:_F22E5.7#F22E5.7#GO:
	-2.27	0.37	0.0376534	0.241529	C55B7.12#che-1_zinc_finger_prtoein#GO:0003676:0005634:0030182:0043565:0045944:0050920_C55B7.12#che-1_zinc_finger_prtoein#GO:0003676:0005634:0030182:0043565:0045944:0050920
	-2.27	-0.17	0.009067	0.100636	R04A9.9#R04A9.9#GO:_R04A9.9#R04A9.9#GO:
	-2.23	6.69	0.000176097	0.00886577	ZK131.10#his-16_histone_H2A#GO:0000786:0003677:0005634:0006334:0046982_ZK131.10#his-16_histone_H2A#GO:0000786:0003677:0005634:0006334:0046982
	-2.19	-0.26	0.0143466	0.133398	Y57A10C.11#Y57A10C.11#GO:_Y57A10C.11#Y57A10C.11#GO:
	-2.18	-0.36	0.0160826	0.142767	C01G10.5#C01G10.5#GO:_C01G10.5#C01G10.5#GO:
	-2.17	6.06	1.36217e-05	0.00166536	Y41D4B.10#dsl-3#GO:0005515:0007154:0016020_Y41D4B.10#dsl-3#GO:0005515:0007154:0016020
	-2.14	1.69	0.00996129	0.106407	C47E12.13#C47E12.13#GO:_C47E12.13#C47E12.13#GO:
	-2.12	1.06	0.00276859	0.0472844	F49B2.1#fbxb-8#GO:0005515_F49B2.1#fbxb-8#GO:0005515
	-2.11	1.99	0.00150475	0.0335998	F47G4.6#F47G4.6#GO:_F47G4.6#F47G4.6#GO:
	-2.11	9.07	0.000166548	0.00860387	F17E9.12#his-31#GO:0000786:0003677:0005634:0006334:0046982_F17E9.12#his-31#GO:0000786:0003677:0005634:0006334:0046982
	-2.1	4.69	0.000281004	0.0116813	F45F2.4#his-7_histone_H2A#GO:0000786:0003677:0005634:0006334:0046982_F45F2.4#his-7_histone_H2A#GO:0000786:0003677:0005634:0006334:0046982
	-2.09	6.15	0.000276712	0.0116813	K03A1.6#his-38_histone-H4#GO:0000786:0003677:0005634:0006334:0046982_K03A1.6#his-38_histone-H4#GO:0000786:0003677:0005634:0006334:0046982
	-2.07	2.25	0.00168876	0.0359091	F44A6.3#F44A6.3#GO:_F44A6.3#F44A6.3#GO:
	-2.01	9.11	0.000214979	0.0101015	K06C4.10#his-18_histone_H4#GO:0000786:0003677:0005634:0006334:0046982_K06C4.10#his-18_histone_H4#GO:0000786:0003677:0005634:0006334:0046982
[...]
20120223_EMB-480.20120419_EMB-420.20120223_EMB-570.20120223_EMB-600
	-5.63	-3.58	0.0121742	0.143478	F34D6.8#F34D6.8#GO:_F34D6.8#F34D6.8#GO:
	-4.68	-1.98	2.12792e-05	0.0021955	T28H10.4#nlp-46#GO:_T28H10.4#nlp-46#GO:
	-4.47	-1.6	4.2335e-05	0.00381814	W04H10.1#W04H10.1#GO:_W04H10.1#W04H10.1#GO:
	-4.2	-1.99	0.00348974	0.0698868	Y57E12AL.2#Y57E12AL.2#GO:_Y57E12AL.2#Y57E12AL.2#GO:
	-4.04	-1.96	0.00122239	0.0388306	F46B6.10#F46B6.10#GO:_F46B6.10#F46B6.10#GO:
	-3.82	-1.48	0.00455597	0.0828749	C28C12.3#C28C12.3#GO:_C28C12.3#C28C12.3#GO:
	-3.59	-2.77	0.00718536	0.108652	W01B6.4#W01B6.4#GO:_W01B6.4#W01B6.4#GO:
	-3.37	-1.86	0.001837	0.0484494	K01A6.8#K01A6.8#GO:_K01A6.8#K01A6.8#GO:
	-3.34	-0.9	0.000133818	0.00944921	Y43F4A.3#Y43F4A.3#GO:_Y43F4A.3#Y43F4A.3#GO:
	-3.28	-2.94	0.0114703	0.13979	F52F10.1#F52F10.1#GO:_F52F10.1#F52F10.1#GO:
	-3.19	-1.38	0.00360842	0.07105	F11F1.5#F11F1.5#GO:_F11F1.5#F11F1.5#GO:
	-2.99	-1.66	0.00129097	0.0404117	C32E8.12#C32E8.12#GO:_C32E8.12#C32E8.12#GO:
	-2.93	-0.79	0.00154978	0.0450019	Y53F4B.32#gst-29_glutathione_S-transferase#GO:0005515_Y53F4B.32#gst-29_glutathione_S-transferase#GO:0005515
	-2.89	-0.74	0.000300591	0.0160195	Y52B11B.1#Y52B11B.1#GO:_Y52B11B.1#Y52B11B.1#GO:
	-2.81	-1.6	0.0131705	0.14913	C06B8.11#C06B8.11#GO:_C06B8.11#C06B8.11#GO:
	-2.66	-0.91	0.0204442	0.18901	W08F4.5#W08F4.5#GO:_W08F4.5#W08F4.5#GO:
	-2.5	4.7	1.84816e-07	6.27257e-05	C24B9.3#C24B9.3#GO:_C24B9.3#C24B9.3#GO:
	-2.41	9.03	6.22676e-09	3.49159e-06	ZK112.7#cdh-3_fat_tumor_suppressor#GO:0005198:0005509:0005515:0005737:0005886:0007156:0016020:0016331:0045138_ZK112.7#cdh-3_fat_tumor_suppressor#GO:0005198:0005509:0005515:0005737:0005886:0007156:0016020:0016331:0045138
	-2.35	2.76	2.86826e-05	0.00271999	Y92C3B.1#kbp-4#GO:_Y92C3B.1#kbp-4#GO:
	-2.22	5.35	3.00802e-09	1.92889e-06	Y22D7AL.9#Y22D7AL.9#GO:_Y22D7AL.9#Y22D7AL.9#GO:
[...]
20120223_EMB-570.20120223_EMB-600.L1.N2_L1-1
	-14.72	4.24	3.94875e-43	2.85848e-40	W08G11.1#W08G11.1#GO:_W08G11.1#W08G11.1#GO:
	-14.53	4.04	3.14776e-40	1.20262e-37	ZK131.10#his-16_histone_H2A#GO:0000786:0003677:0005634:0006334:0046982_ZK131.10#his-16_histone_H2A#GO:0000786:0003677:0005634:0006334:0046982
	-14.43	6.86	1.02081e-49	1.01021e-45	K06C4.10#his-18_histone_H4#GO:0000786:0003677:0005634:0006334:0046982_K06C4.10#his-18_histone_H4#GO:0000786:0003677:0005634:0006334:0046982
	-13.97	7.26	6.14495e-49	2.11294e-45	Y65B4BL.6#Y65B4BL.6#GO:_Y65B4BL.6#Y65B4BL.6#GO:
	-13.53	3.04	9.7788e-10	1.15846e-08	F11G11.12#col-73_collagen#GO:0042302_F11G11.12#col-73_collagen#GO:0042302
	-13.53	6.48	4.14291e-48	8.14022e-45	F54E12.1#his-55_histone_H3#GO:0000786:0003677:0006334:0046982_F54E12.1#his-55_histone_H3#GO:0000786:0003677:0006334:0046982
	-13.43	7.74	4.82868e-42	2.6194e-39	F22B3.1#his-64_histone_H4#GO:0000786:0003677:0005634:0006334:0046982_F22B3.1#his-64_histone_H4#GO:0000786:0003677:0005634:0006334:0046982
	-12.96	2.46	4.71177e-22	1.90046e-20	F36D1.8#F36D1.8#GO:_F36D1.8#F36D1.8#GO:
	-12.89	8.18	2.68256e-38	7.61998e-36	T10C6.14#his-1_histone_H4#GO:0000786:0003677:0005634:0006334:0046982_T10C6.14#his-1_histone_H4#GO:0000786:0003677:0005634:0006334:0046982
	-12.56	2.07	9.10687e-18	2.5826e-16	Y48G8AL.12#Y48G8AL.12#GO:_Y48G8AL.12#Y48G8AL.12#GO:
	-12.49	4.08	7.41464e-40	2.60753e-37	R05D8.11#R05D8.11#GO:_R05D8.11#R05D8.11#GO:
	-12.41	7.14	2.22965e-46	2.7042e-43	F18C5.5#F18C5.5#GO:_F18C5.5#F18C5.5#GO:
	-12.19	4.6	2.68985e-47	4.62453e-44	F45F2.3#his-5_histone_H4#GO:0000786:0003677:0005634:0006334:0046982_F45F2.3#his-5_histone_H4#GO:0000786:0003677:0005634:0006334:0046982
	-12.17	8.81	1.39796e-35	2.70811e-33	F54E12.5#his-57_histone_H2A#GO:0000786:0003677:0005634:0006334:0046982_F54E12.5#his-57_histone_H2A#GO:0000786:0003677:0005634:0006334:0046982
	-12.17	8.81	1.43471e-35	2.7407e-33	H02I12.7#his-65_Core_histones_H2A_H2B_H3_and_H4#GO:0000786:0003677:0005634:0006334:0046982_H02I12.7#his-65_Core_histones_H2A_H2B_H3_and_H4#GO:0000786:0003677:0005634:0006334:0046982
	-11.84	7.05	6.01853e-31	5.55562e-29	K06C4.2#his-28_histone_H4#GO:0000786:0003677:0005634:0006334:0046982_K06C4.2#his-28_histone_H4#GO:0000786:0003677:0005634:0006334:0046982
	-11.84	7.05	6.62036e-31	6.07043e-29	F07B7.9#his-50#GO:0000786:0003677:0005634:0006334:0046982_F07B7.9#his-50#GO:0000786:0003677:0005634:0006334:0046982
	-11.75	1.25	3.44622e-14	6.89946e-13	cTel3X.1#cTel3X.1#GO:_cTel3X.1#cTel3X.1#GO:
	-11.7	8.51	2.10323e-16	5.29814e-15	B0035.9#his-46_histone_H4#GO:0000786:0003677:0005634:0006334:0046982_B0035.9#his-46_histone_H4#GO:0000786:0003677:0005634:0006334:0046982
	-11.7	8.51	2.11431e-16	5.31632e-15	F54E12.3#his-56_histone_H4#GO:0000786:0003677:0005634:0006334:0046982_F54E12.3#his-56_histone_H4#GO:0000786:0003677:0005634:0006334:0046982
[...]
	80 minutes without 4cell, choosing logFC >1 and p<=0.05 lists of specific genes, sorted by logFC top 20 up regulated
20120223_EMB-0.20120223_EMB-30.20120223_EMB-90.20120411_EMB-60
	logFC	logCPM	p-value	FDR	Symbol
	11.44	1.64	8.06014e-07	7.92916e-05	F47G4.6#F47G4.6#GO:_F47G4.6#F47G4.6#GO:
	9.89	-0.03	9.09711e-05	0.00170679	F07C3.9#F07C3.9#GO:_F07C3.9#F07C3.9#GO:
	9.79	-0.14	0.000102875	0.00185726	D1086.12#D1086.12#GO:_D1086.12#D1086.12#GO:
	9.39	-0.62	0.00295177	0.0204524	T03E6.9#T03E6.9#GO:_T03E6.9#T03E6.9#GO:
	9.31	-0.71	0.00318947	0.0216078	C02E7.2#srh-21_7TM_chemoreceptor_srh_family#GO:_C02E7.2#srh-21_7TM_chemoreceptor_srh_family#GO:
	9.2	-0.76	0.000232817	0.00329643	T09A5.14#T09A5.14#GO:_T09A5.14#T09A5.14#GO:
	8.98	-0.91	0.000163638	0.00261489	C07B5.6#C07B5.6#GO:_C07B5.6#C07B5.6#GO:
	8.93	-1.12	0.00450079	0.0272548	M03F4.4#M03F4.4#GO:_M03F4.4#M03F4.4#GO:
	8.9	-1.15	0.00454274	0.0273605	Y26D4A.6#clec-108#GO:0030246_Y26D4A.6#clec-108#GO:0030246
	8.83	-1.23	0.00486324	0.0286158	C44B11.6#C44B11.6#GO:_C44B11.6#C44B11.6#GO:
	8.78	-1.28	0.00504209	0.0292851	Y53H1B.4#Y53H1B.4#GO:_Y53H1B.4#Y53H1B.4#GO:
	8.74	-1.25	0.000640335	0.00673843	Y39H10A.5#Y39H10A.5#GO:_Y39H10A.5#Y39H10A.5#GO:
	8.7	-1.34	0.00138927	0.0117776	D1053.2#D1053.2#GO:_D1053.2#D1053.2#GO:
	8.62	-1.45	0.00579315	0.0323731	ZK488.7#pqn-98#GO:_ZK488.7#pqn-98#GO:
	8.58	-1.33	0.000417107	0.00500529	Y68A4A.13#Y68A4A.13#GO:_Y68A4A.13#Y68A4A.13#GO:
	8.39	-1.68	0.00393309	0.0247958	F52F12.8#F52F12.8#GO:_F52F12.8#F52F12.8#GO:
	8.38	-1.64	0.0017299	0.0140233	EGAP9.4#EGAP9.4#GO:_EGAP9.4#EGAP9.4#GO:
	7.58	-2.29	0.00277048	0.0197021	C43H6.8#hlh-15#GO:0001085:0046983_C43H6.8#hlh-15#GO:0001085:0046983
	7.45	-1.98	0.00935413	0.0454192	F52E10.2#F52E10.2#GO:_F52E10.2#F52E10.2#GO:
	7.4	-2.61	0.0151443	0.0634529	H31G24.1#H31G24.1#GO:_H31G24.1#H31G24.1#GO:
[...]
20120223_EMB-90.20120411_EMB-60.20120411_EMB-120.20120223_EMB-180
	10.76	1.54	0.000226494	0.00890504	ZK863.2#col-37_collagen#GO:0042302_ZK863.2#col-37_collagen#GO:0042302
	10.67	3.51	4.59663e-07	0.000133105	ZC513.8#col-43_cuticualr_collagen#GO:0042302_ZC513.8#col-43_cuticualr_collagen#GO:0042302
	10.06	0.9	0.000677867	0.0186234	C13A2.12#C13A2.12#GO:_C13A2.12#C13A2.12#GO:
	9.54	0.43	0.00122063	0.0280695	T28F2.8#col-51_cuticular_collagen#GO:0042302_T28F2.8#col-51_cuticular_collagen#GO:0042302
	9.31	0.23	0.00159434	0.0332126	H06A10.2#col-185_[030711_pad]_Collagen_containing_2_Collagen_triple_helix_repeat_regions20_copies_and_a_Nematode_cuticle_collagen_N-terminal_domain.#GO:0042302_H06A10.2#col-185_[030711_pad]_Collagen_containing_2_Collagen_triple_helix_repeat_regions20_copies_and_a_Nematode_cuticle_collagen_N-terminal_domain.#GO:0042302
	9.3	0.22	0.00162248	0.0333773	F02D10.1#col-183_cuticle_collagen#GO:0042302_F02D10.1#col-183_cuticle_collagen#GO:0042302
	9.13	2.76	5.08465e-05	0.00334587	C27H5.5#col-36_cuticular_collagen#GO:0042302_C27H5.5#col-36_cuticular_collagen#GO:0042302
	9.08	0.03	0.00206043	0.0389828	F22D6.10#col-60_collagen#GO:0042302_F22D6.10#col-60_collagen#GO:0042302
	9.05	-0.01	0.00215993	0.0401078	Y51H4A.9#col-137#GO:0042302_Y51H4A.9#col-137#GO:0042302
	8.75	-0.26	0.00297401	0.049002	E02A10.2#grl-23#GO:_E02A10.2#grl-23#GO:
	8.23	-0.72	0.00546254	0.0745638	Y47D7A.15#Y47D7A.15#GO:_Y47D7A.15#Y47D7A.15#GO:
	7.99	-1.64	0.00219318	0.0403806	C34E11.7#C34E11.7#GO:_C34E11.7#C34E11.7#GO:
	7.91	-1.85	0.00336917	0.05342	W06A7.2#W06A7.2#GO:_W06A7.2#W06A7.2#GO:
	7.64	-2.21	0.00683272	0.0843015	W09G12.10#W09G12.10#GO:_W09G12.10#W09G12.10#GO:
	7.52	-2.48	0.0188103	0.164705	R160.4#R160.4#GO:_R160.4#R160.4#GO:
	7.43	-2.55	0.0198209	0.1694	Y80D3A.10#nlp-42#GO:_Y80D3A.10#nlp-42#GO:
	7.15	-2.23	0.00699801	0.0856209	B0350.3#B0350.3#GO:_B0350.3#B0350.3#GO:
	7.08	2.9	9.23716e-06	0.000942286	C27H5.7#dyf-13#GO:0005515:0040010_C27H5.7#dyf-13#GO:0005515:0040010
	7	-0.65	0.00160694	0.0333168	C24H10.3#C24H10.3#GO:_C24H10.3#C24H10.3#GO:
	6.9	-2.73	0.0154074	0.143691	C07A12.2#C07A12.2#GO:_C07A12.2#C07A12.2#GO:
[...]
20120411_EMB-120.20120223_EMB-180.20120223_EMB-240.20120223_EMB-270
	9.49	0.22	1.30655e-05	0.00053696	B0491.2#sqt-1_cuticle_collagen_SQT-1#GO:0010171:0040002:0040015:0042302:0042329_B0491.2#sqt-1_cuticle_collagen_SQT-1#GO:0010171:0040002:0040015:0042302:0042329
	8.72	-0.43	3.9944e-06	0.000187158	C27A2.8#C27A2.8#GO:_C27A2.8#C27A2.8#GO:
	7.49	-1.58	0.000146998	0.00403632	T02H6.8#T02H6.8#GO:_T02H6.8#T02H6.8#GO:
	5.06	-0.79	6.34382e-05	0.00206472	K10H10.12#K10H10.12#GO:_K10H10.12#K10H10.12#GO:
	4.68	-1.09	0.00031581	0.00734541	F28H1.4#F28H1.4#GO:_F28H1.4#F28H1.4#GO:
	4.23	-1.46	0.00163121	0.0251129	C34B2.1#tag-272#GO:_C34B2.1#tag-272#GO:
	4.18	-1.49	0.00585292	0.0638554	Y110A7A.20#Y110A7A.20#GO:_Y110A7A.20#Y110A7A.20#GO:
	4.09	0.1	0.000119447	0.00341745	F45D3.3#F45D3.3#GO:_F45D3.3#F45D3.3#GO:
	4.02	-0.43	0.000280073	0.00679107	K08E7.6#K08E7.6#GO:_K08E7.6#K08E7.6#GO:
	3.5	0.45	0.00115507	0.0199342	K02E11.11#K02E11.11#GO:_K02E11.11#K02E11.11#GO:
	3.47	-0.44	0.00115746	0.01994	C27H5.1#pdl-1#GO:0004114:0007601_C27H5.1#pdl-1#GO:0004114:0007601
	3.4	-0.38	0.00111278	0.0193629	E02H9.6#E02H9.6#GO:_E02H9.6#E02H9.6#GO:
	3.21	-1.56	0.00576421	0.0631718	ZC477.4#ZC477.4#GO:_ZC477.4#ZC477.4#GO:
	3.11	-2.42	0.0358735	0.214379	T24D8.6#T24D8.6#GO:_T24D8.6#T24D8.6#GO:
	3.1	0.78	0.000540433	0.0113211	Y116A8C.3#Y116A8C.3#GO:_Y116A8C.3#Y116A8C.3#GO:
	3.06	0.25	0.00242887	0.034191	F47C12.6#F47C12.6#GO:_F47C12.6#F47C12.6#GO:
	3.05	0.15	0.0117464	0.103477	ZK6.10#dod-19#GO:_ZK6.10#dod-19#GO:
	3.02	-0.54	0.00375789	0.0467879	F41G3.18#F41G3.18#GO:_F41G3.18#F41G3.18#GO:
	2.99	0.71	0.00305229	0.0400598	Y119D3B.18#fbxa-91#GO:0005515_Y119D3B.18#fbxa-91#GO:0005515
	2.99	0.71	0.00304783	0.0400554	Y119D3B.20#fbxa-92#GO:0005515_Y119D3B.20#fbxa-92#GO:0005515
[...]
20120223_EMB-240.20120223_EMB-270.20120419_EMB-270.20120223_EMB-330
	8.41	-0.94	5.43991e-07	3.24414e-05	F26D11.6#F26D11.6#GO:_F26D11.6#F26D11.6#GO:
	7.92	-1.3	2.29646e-06	9.99689e-05	Y57G11B.6#Y57G11B.6#GO:_Y57G11B.6#Y57G11B.6#GO:
	7.6	-1.54	1.29717e-05	0.000376984	C16D9.9#C16D9.9#GO:_C16D9.9#C16D9.9#GO:
	7.59	-1.79	0.000166711	0.00286659	K11G9.6#mtl-1#GO:0009408:0046686_K11G9.6#mtl-1#GO:0009408:0046686
	6.99	-0.19	4.4382e-07	2.80103e-05	F49D11.6#F49D11.6#GO:_F49D11.6#F49D11.6#GO:
	6.74	-2.43	0.000611218	0.00767145	T02H6.6#T02H6.6#GO:_T02H6.6#T02H6.6#GO:
	6.55	-2.47	0.000528283	0.00689911	Y50D4B.1#Y50D4B.1#GO:_Y50D4B.1#Y50D4B.1#GO:
	6.42	0.6	9.38391e-09	1.25255e-06	ZK616.9#spp-7#GO:_ZK616.9#spp-7#GO:
	6.41	0.07	8.1103e-08	7.60672e-06	T13C5.7#T13C5.7#GO:_T13C5.7#T13C5.7#GO:
	6.27	-0.83	1.69212e-06	7.82853e-05	C02F5.14#C02F5.14#GO:_C02F5.14#C02F5.14#GO:
	5.93	-2.94	0.00436187	0.0356024	H22D14.1#nhr-267_Zinc_finger_C4_type_two_domains#GO:0003700:0003707:0005634:0006355:0008270:0043401:0043565_H22D14.1#nhr-267_Zinc_finger_C4_type_two_domains#GO:0003700:0003707:0005634:0006355:0008270:0043401:0043565
	5.88	-3	0.00514314	0.0402899	D2007.3#D2007.3#GO:_D2007.3#D2007.3#GO:
	5.79	-1.36	8.66789e-05	0.00172638	K09E4.6#cpg-7#GO:_K09E4.6#cpg-7#GO:
	5.7	2.87	1.32122e-05	0.00037871	ZK1290.12#wrt-1_warthog_gene#GO:0006508:0007154:0007275:0008233_ZK1290.12#wrt-1_warthog_gene#GO:0006508:0007154:0007275:0008233
	5.7	0.86	6.62969e-08	6.56922e-06	F15H10.8#F15H10.8#GO:_F15H10.8#F15H10.8#GO:
	5.63	1.46	1.78148e-07	1.41381e-05	B0496.7#valv-1#GO:0008270:0009987:0018991:0022600_B0496.7#valv-1#GO:0008270:0009987:0018991:0022600
	5.47	-3.31	0.0201717	0.108717	C24D10.8#nspd-6#GO:_C24D10.8#nspd-6#GO:
	5.4	-3.32	0.0210734	0.112047	F42G4.6#F42G4.6#GO:_F42G4.6#F42G4.6#GO:
	5.27	-0.45	1.1732e-05	0.000354954	Y51H7BR.4#Y51H7BR.4#GO:_Y51H7BR.4#Y51H7BR.4#GO:
	5	2.52	7.00788e-09	1.01831e-06	F01D5.6#F01D5.6#GO:_F01D5.6#F01D5.6#GO:
[...]
20120419_EMB-270.20120223_EMB-330.20120419_EMB-330.20120223_EMB-420
	8.35	-0.85	9.95016e-07	0.000208709	Y7A5A.10#Y7A5A.10#GO:_Y7A5A.10#Y7A5A.10#GO:
	8.32	-0.81	2.02409e-07	7.36833e-05	C05G5.7#C05G5.7#GO:_C05G5.7#C05G5.7#GO:
	8.1	-1.02	5.83945e-07	0.000142402	R07B1.6#R07B1.6#GO:_R07B1.6#R07B1.6#GO:
	7.68	-1.44	1.222e-05	0.00116799	Y39G8B.9#Y39G8B.9#GO:_Y39G8B.9#Y39G8B.9#GO:
	7.35	1.34	3.63696e-10	5.05401e-07	R12E2.15#R12E2.15#GO:_R12E2.15#R12E2.15#GO:
	7.09	-1.94	0.000106762	0.00527502	C33D9.10#C33D9.10#GO:_C33D9.10#C33D9.10#GO:
	7.05	-2.03	0.000743163	0.0183972	E03A3.3#his-69_histone_H3#GO:0000786:0003677:0006334:0046982_E03A3.3#his-69_histone_H3#GO:0000786:0003677:0006334:0046982
	6.45	-0.22	6.02201e-07	0.000142402	C29F3.5#clec-230_Lectin_C-type_domain#GO:0030246_C29F3.5#clec-230_Lectin_C-type_domain#GO:0030246
	6.21	-2.64	0.00295209	0.0452044	W05F2.8#W05F2.8#GO:_W05F2.8#W05F2.8#GO:
	5.64	-1.08	3.3691e-05	0.00237052	ZK742.7#ZK742.7#GO:_ZK742.7#ZK742.7#GO:
	5.37	6.61	3.62139e-16	2.01295e-12	Y75B8A.20#grl-15#GO:_Y75B8A.20#grl-15#GO:
	5.32	-1.25	0.000234921	0.00900882	Y46G5A.36#Y46G5A.36#GO:_Y46G5A.36#Y46G5A.36#GO:
	5.3	-1.33	3.9807e-05	0.00266587	F08G12.11#F08G12.11#GO:_F08G12.11#F08G12.11#GO:
	5.03	3.41	3.10143e-08	1.92103e-05	Y47D7A.5#grl-5#GO:_Y47D7A.5#grl-5#GO:
	4.95	2.17	3.11505e-06	0.000467974	H23N18.5#H23N18.5#GO:_H23N18.5#H23N18.5#GO:
	4.93	2.03	7.75337e-05	0.00418419	T03F1.11#T03F1.11#GO:_T03F1.11#T03F1.11#GO:
	4.81	2.04	3.04778e-10	4.84032e-07	R09B5.8#cnc-3#GO:_R09B5.8#cnc-3#GO:
	4.79	-1.62	0.000452833	0.013717	F13A2.2#F13A2.2#GO:_F13A2.2#F13A2.2#GO:
	4.75	5.88	1.26829e-19	1.40996e-15	C02E7.6#C02E7.6#GO:_C02E7.6#C02E7.6#GO:
	4.69	-0.32	2.01699e-05	0.00168027	F53A9.3#F53A9.3#GO:_F53A9.3#F53A9.3#GO:
[...]
20120419_EMB-330.20120223_EMB-420.20120223_EMB-480.20120419_EMB-420
	9.6	0.13	1.04356e-07	5.15435e-05	T01B10.2#grd-14#GO:_T01B10.2#grd-14#GO:
	8.8	-0.61	6.52805e-08	4.03042e-05	C18A11.2#C18A11.2#GO:_C18A11.2#C18A11.2#GO:
	8.27	-1.1	4.2279e-06	0.000716254	F23D12.7#F23D12.7#GO:_F23D12.7#F23D12.7#GO:
	7.97	-1.38	3.01459e-05	0.00282902	E02H4.7#E02H4.7#GO:_E02H4.7#E02H4.7#GO:
	7.85	-1.46	6.12611e-06	0.000933891	F20A1.1#F20A1.1#GO:_F20A1.1#F20A1.1#GO:
	7.33	-1.93	0.000268085	0.0114647	B0207.10#B0207.10#GO:_B0207.10#B0207.10#GO:
	6.87	-0.08	8.12545e-08	4.56059e-05	F35C5.8#clec-65_von_Willebrand_factor_type_A_domain#GO:0030246_F35C5.8#clec-65_von_Willebrand_factor_type_A_domain#GO:0030246
	6.86	-2.3	0.000501693	0.0169724	F22B7.4#fip-1_Environmental_stress#GO:_F22B7.4#fip-1_Environmental_stress#GO:
	6.03	-0.01	7.78329e-07	0.000213574	F26B1.4#col-58#GO:0042302_F26B1.4#col-58#GO:0042302
	5.96	-1.02	2.75952e-05	0.00266208	E02C12.4#ttr-40#GO:0005615_E02C12.4#ttr-40#GO:0005615
	5.69	-1.25	2.23509e-05	0.00228091	C45G9.14#C45G9.14#GO:_C45G9.14#C45G9.14#GO:
	5.56	-1.37	7.06001e-05	0.00481641	C27D6.3#C27D6.3_MST101-2_protein_Fruit_Fly#GO:_C27D6.3#C27D6.3_MST101-2_protein_Fruit_Fly#GO:
	5.53	0.19	1.73397e-06	0.000382339	K04D7.6#K04D7.6#GO:_K04D7.6#K04D7.6#GO:
	5.1	-1.66	0.000310954	0.012507	R02E12.5#R02E12.5#GO:_R02E12.5#R02E12.5#GO:
	5.07	-1.69	0.00105195	0.0261884	ZC581.10#ZC581.10#GO:_ZC581.10#ZC581.10#GO:
	5.05	-0.88	0.000487236	0.0167122	ZK666.14#ZK666.14#GO:_ZK666.14#ZK666.14#GO:
	4.97	-0.96	0.000627415	0.0193683	E01H11.3#flp-20#GO:0061096_E01H11.3#flp-20#GO:0061096
	4.94	-0.99	5.4017e-05	0.00413413	W07G4.8#W07G4.8#GO:_W07G4.8#W07G4.8#GO:
	4.94	-0.47	3.14959e-05	0.00282902	C31H2.3#C31H2.3#GO:_C31H2.3#C31H2.3#GO:
	4.92	3.37	4.11118e-05	0.00343006	K01D12.9#K01D12.9#GO:_K01D12.9#K01D12.9#GO:
[...]
20120223_EMB-480.20120419_EMB-420.20120223_EMB-570.20120223_EMB-600
	7.14	-2.34	0.000345375	0.017872	F53B6.8#fipr-26#GO:_F53B6.8#fipr-26#GO:
	6.84	7.38	1.10694e-06	0.000236676	T27E4.2#hsp-16.11_heat_shock_protein_HSP16-1#GO:0030968_T27E4.2#hsp-16.11_heat_shock_protein_HSP16-1#GO:0030968
	6.84	7.38	1.10684e-06	0.000236676	T27E4.8#hsp-16.1_heat_shock_protein_HSP16-1#GO:0005797:0030968_T27E4.8#hsp-16.1_heat_shock_protein_HSP16-1#GO:0005797:0030968
	6.45	9.13	7.16805e-06	0.000953056	F44E5.5#F44E5.5_Heat_shock_hsp70_proteins#GO:_F44E5.5#F44E5.5_Heat_shock_hsp70_proteins#GO:
	6.45	9.13	7.16643e-06	0.000953056	F44E5.4#F44E5.4_Heat_shock_hsp70_proteins#GO:_F44E5.4#F44E5.4_Heat_shock_hsp70_proteins#GO:
	6.13	3.91	3.58424e-05	0.00325535	Y46H3A.2#hsp-16.41_heat_shock_protein#GO:0030968_Y46H3A.2#hsp-16.41_heat_shock_protein#GO:0030968
	5.71	-3.25	0.00995963	0.131205	F26G1.7#msp-3_Major_sperm_protein#GO:0005198_F26G1.7#msp-3_Major_sperm_protein#GO:0005198
	5.66	3.07	5.56436e-06	0.000780039	Y46H3A.3#hsp-16.2_heat_shock_protein#GO:0005737:0030968_Y46H3A.3#hsp-16.2_heat_shock_protein#GO:0005737:0030968
	5.61	6.58	9.52305e-06	0.00120411	T27E4.9#hsp-16.49_heat_shock_protein_HSP16-48#GO:0030968_T27E4.9#hsp-16.49_heat_shock_protein_HSP16-48#GO:0030968
	5.61	6.58	9.5211e-06	0.00120411	T27E4.3#hsp-16.48_heat_shock_protein_HSP16-48#GO:0008340_T27E4.3#hsp-16.48_heat_shock_protein_HSP16-48#GO:0008340
	5.19	3.61	6.36772e-05	0.00519775	Y73B6BL.34#col-112#GO:0040002:0042302_Y73B6BL.34#col-112#GO:0040002:0042302
	5.06	2.53	1.9186e-06	0.000361074	F52B11.4#col-133_CUTICLE_COLLAGEN_34#GO:0042302_F52B11.4#col-133_CUTICLE_COLLAGEN_34#GO:0042302
	5	2.51	0.000884592	0.0320466	Y51H7C.13#Y51H7C.13#GO:_Y51H7C.13#Y51H7C.13#GO:
	4.96	3.42	0.000255067	0.014227	Y57A10A.11#rol-1#GO:0010171:0040002:0042302_Y57A10A.11#rol-1#GO:0010171:0040002:0042302
	4.71	0.67	0.00107521	0.0360183	Y47D7A.15#Y47D7A.15#GO:_Y47D7A.15#Y47D7A.15#GO:
	4.61	-2.17	0.0053059	0.0909976	F58A6.9#F58A6.9_major_sperm_protein#GO:_F58A6.9#F58A6.9_major_sperm_protein#GO:
	4.6	0.49	0.000250338	0.0141365	F17E9.5#F17E9.5#GO:_F17E9.5#F17E9.5#GO:
	4.48	3.23	0.000217586	0.0130055	F11G11.12#col-73_collagen#GO:0042302_F11G11.12#col-73_collagen#GO:0042302
	4.33	0.63	0.015238	0.160285	C08F11.11#C08F11.11#GO:_C08F11.11#C08F11.11#GO:
	4.26	1.98	0.000749308	0.0291079	M18.1#col-129_collagen#GO:0042302_M18.1#col-129_collagen#GO:0042302
[...]
20120223_EMB-570.20120223_EMB-600.L1.N2_L1-1
	15.34	4.86	1.80183e-44	1.45778e-41	C49F5.7#C49F5.7#GO:_C49F5.7#C49F5.7#GO:
	14.96	4.48	7.02379e-44	5.36696e-41	Y73F4A.3#Y73F4A.3#GO:_Y73F4A.3#Y73F4A.3#GO:
	11.42	4.42	4.69062e-14	9.33644e-13	B0213.3#nlp-28#GO:_B0213.3#nlp-28#GO:
	10.87	0.46	9.81598e-12	1.47229e-10	F10D2.8#F10D2.8#GO:_F10D2.8#F10D2.8#GO:
	10.62	0.22	5.32519e-11	7.33895e-10	T01C8.3#T01C8.3#GO:_T01C8.3#T01C8.3#GO:
	10.51	3.59	2.80667e-21	1.05473e-19	ZC334.1#ins-26#GO:0005179:0005576_ZC334.1#ins-26#GO:0005179:0005576
	10.45	0.06	1.55964e-10	2.0333e-09	C12D8.14#fipr-4#GO:_C12D8.14#fipr-4#GO:
	10.23	6.62	1.21505e-32	1.46595e-30	C08E3.1#C08E3.1#GO:_C08E3.1#C08E3.1#GO:
	10.1	4.13	3.27768e-23	1.48783e-21	F46C5.1#F46C5.1#GO:_F46C5.1#F46C5.1#GO:
	9.89	2.99	9.77022e-15	2.06104e-13	D1025.4#nspc-20#GO:_D1025.4#nspc-20#GO:
	9.76	4.24	5.02244e-19	1.57354e-17	C01G10.15#C01G10.15#GO:_C01G10.15#C01G10.15#GO:
	9.71	1.93	7.07497e-14	1.38815e-12	F11C7.7#F11C7.7#GO:_F11C7.7#F11C7.7#GO:
	9.67	4.05	2.04001e-14	4.18155e-13	K02E11.7#K02E11.7#GO:_K02E11.7#K02E11.7#GO:
	9.6	8.63	2.77233e-18	8.21781e-17	F28F8.2#F28F8.2_long-chain-fatty-acid-CoA_acs-2_ligase#GO:_F28F8.2#F28F8.2_long-chain-fatty-acid-CoA_acs-2_ligase#GO:
	9.59	8.2	4.10408e-25	2.18789e-23	C05C10.4#pho-11_acid_phosphatase#GO:0003993_C05C10.4#pho-11_acid_phosphatase#GO:0003993
	9.51	8.98	5.58047e-15	1.21063e-13	F46F2.3#F46F2.3#GO:_F46F2.3#F46F2.3#GO:
	9.44	5.38	1.67827e-46	2.3083e-43	Y43C5A.3#Y43C5A.3#GO:_Y43C5A.3#Y43C5A.3#GO:
	9.43	-0.88	4.59665e-08	4.22609e-07	M04D8.1#ins-21#GO:_M04D8.1#ins-21#GO:
	9.43	2.58	2.28765e-06	1.54086e-05	C08E3.13#C08E3.13#GO:_C08E3.13#C08E3.13#GO:
	9.36	7.49	7.00303e-22	2.75199e-20	T02B11.3#T02B11.3#GO:_T02B11.3#T02B11.3#GO:
[...]

## Sheet: Top20 UP DOWN by GO category
	80 minutes without 4cell, choosing logFC >1 and p<=0.05 lists of GO categories associated with the genes, sorted by logFC top 20 down regulated
	20120223_EMB-0.20120223_EMB-30.20120223_EMB-90.20120411_EMB-60
	count	GO category	GO category description
	163	5515	protein binding
	91	5524	ATP binding
	84	5737	cytoplasm
	76	5634	nucleus
	45	9792	embryo development ending in birth or egg hatchingo
	42	3677	DNA binding
	40	16772	transferase activity, transferring phosphorus-containing groups
	40	8270	zinc ion binding
	39	3676	nucleic acid binding
	38	16021	integral component of membrane
	38	166	nucleotide binding
	37	6468	protein phosphorylation
	35	4672	protein kinase activity
	35	3	reproduction
	34	3824	catalytic activity
	33	43186	P granule
	32	16020	membrane
	32	5488	binding
	30	46872	metal ion binding
	28	6355	regulation of transcription, DNA-templated
	20120223_EMB-90.20120411_EMB-60.20120411_EMB-120.20120223_EMB-180
	79	5515	protein	binding
	45	5634	nucleus
	27	6355	regulation	of	transcription,	DNA-templated
	26	5737	cytoplasm
	24	3700	sequence-specific	DNA	binding	transcription	factor	activity
	23	43186	P	granule
	21	46872	metal	ion	binding
	17	9792	embryo	development	ending	in	birth	or	egg	hatching
	17	8270	zinc	ion	binding
	17	3723	RNA	binding
	15	3677	DNA	binding
	15	3676	nucleic	acid	binding
	13	5524	ATP	binding
	13	3	reproduction
	12	55114	oxidation-reduction	process
	12	43565	sequence-specific	DNA	binding
	12	6511	ubiquitin-dependent	protein	catabolic	process
	11	3824	catalytic	activity
	10	51603	proteolysis	involved	in	cellular	protein	catabolic	process
	10	16021	integral	component	of	membrane
	20120411_EMB-120.20120223_EMB-180.20120223_EMB-240.20120223_EMB-270
	71	5515	protein	binding
	39	5634	nucleus
	33	42302	structural	constituent	of	cuticle
	25	6355	regulation	of	transcription,	DNA-templated
	24	3700	sequence-specific	DNA	binding	transcription	factor	activity
	23	3677	DNA	binding
	16	43565	sequence-specific	DNA	binding
	12	5737	cytoplasm
	12	5524	ATP	binding
	11	8152	metabolic	process
	11	6511	ubiquitin-dependent	protein	catabolic	process
	11	3824	catalytic	activity
	10	46982	protein	heterodimerization	activity
	10	16021	integral	component	of	membrane
	10	9792	embryo	development	ending	in	birth	or	egg	hatching
	10	166	nucleotide	binding
	9	8270	zinc	ion	binding
	9	5622	intracellular
	8	16020	membrane
	7	46872	metal	ion	binding
	20120223_EMB-240.20120223_EMB-270.20120419_EMB-270.20120223_EMB-330
	45	5634	nucleus
	41	5515	protein	binding
	27	3677	DNA	binding
	19	6355	regulation	of	transcription,	DNA-templated
	18	3700	sequence-specific	DNA	binding	transcription	factor	activity
	15	5524	ATP	binding
	13	43565	sequence-specific	DNA	binding
	11	166	nucleotide	binding
	10	9792	embryo	development	ending	in	birth	or	egg	hatching
	10	5737	cytoplasm
	9	6260	DNA	replication
	8	17111	nucleoside-triphosphatase	activity
	8	786	nucleosome
	7	8270	zinc	ion	binding
	7	6511	ubiquitin-dependent	protein	catabolic	process
	7	6334	nucleosome	assembly
	7	3676	nucleic	acid	binding
	6	42302	structural	constituent	of	cuticle
	5	42555	MCM	complex
	5	16021	integral	component	of	membrane
	20120419_EMB-270.20120223_EMB-330.20120419_EMB-330.20120223_EMB-420
	74	5634	nucleus
	65	3677	DNA	binding
	49	786	nucleosome
	48	6334	nucleosome	assembly
	46	46982	protein	heterodimerization	activity
	35	5515	protein	binding
	27	5524	ATP	binding
	20	9792	embryo	development	ending	in	birth	or	egg	hatching
	15	5737	cytoplasm
	14	6260	DNA	replication
	13	42302	structural	constituent	of	cuticle
	12	6468	protein	phosphorylation
	12	3700	sequence-specific	DNA	binding	transcription	factor	activity
	11	16772	transferase	activity,	transferring	phosphorus-containing	groups
	11	6355	regulation	of	transcription,	DNA-templated
	11	4672	protein	kinase	activity
	9	70	mitotic	sister	chromatid	segregation
	8	51233	spindle	midzone
	8	43565	sequence-specific	DNA	binding
	8	5819	spindle
	20120419_EMB-330.20120223_EMB-420.20120223_EMB-480.20120419_EMB-420
	75	5634	nucleus
	58	3677	DNA	binding
	52	46982	protein	heterodimerization	activity
	51	786	nucleosome
	50	6334	nucleosome	assembly
	29	5515	protein	binding
	19	5737	cytoplasm
	15	5524	ATP	binding
	13	43565	sequence-specific	DNA	binding
	13	9792	embryo	development	ending	in	birth	or	egg	hatching
	13	3700	sequence-specific	DNA	binding	transcription	factor	activity
	9	8270	zinc	ion	binding
	9	6355	regulation	of	transcription,	DNA-templated
	8	16772	transferase	activity,	transferring	phosphorus-containing	groups
	7	51233	spindle	midzone
	7	46983	protein	dimerization	activity
	7	8152	metabolic	process
	7	6508	proteolysis
	7	6468	protein	phosphorylation
	7	4672	protein	kinase	activity
	20120223_EMB-480.20120419_EMB-420.20120223_EMB-570.20120223_EMB-600
	74	5515	protein	binding
	25	5634	nucleus
	23	5524	ATP	binding
	20	8270	zinc	ion	binding
	19	2119	nematode	larval	development
	17	5737	cytoplasm
	17	3677	DNA	binding
	16	16020	membrane
	16	5509	calcium	ion	binding
	16	3676	nucleic	acid	binding
	15	16772	transferase	activity,	transferring	phosphorus-containing	groups
	15	5488	binding
	13	6468	protein	phosphorylation
	13	4672	protein	kinase	activity
	12	9792	embryo	development	ending	in	birth	or	egg	hatching
	11	6355	regulation	of	transcription,	DNA-templated
	9	10172	embryonic	body	morphogenesis
	9	5622	intracellular
	8	40011	locomotion
	8	18996	molting	cycle,	collagen	and	cuticulin-based	cuticle
	20120223_EMB-570.20120223_EMB-600.L1.N2_L1-1
	240	5515	protein	binding
	182	5634	nucleus
	121	3677	DNA	binding
	118	16020	membrane
	100	6355	regulation	of	transcription,	DNA-templated
	99	3700	sequence-specific	DNA	binding	transcription	factor	activity
	92	43565	sequence-specific	DNA	binding
	88	8270	zinc	ion	binding
	79	42302	structural	constituent	of	cuticle
	71	5737	cytoplasm
	66	46982	protein	heterodimerization	activity
	66	16021	integral	component	of	membrane
	63	6334	nucleosome	assembly
	63	786	nucleosome
	54	9792	embryo	development	ending	in	birth	or	egg	hatching
	47	5524	ATP	binding
	40	6508	proteolysis
	40	2119	nematode	larval	development
	38	16772	transferase	activity,	transferring	phosphorus-containing	groups
	38	6468	protein	phosphorylation
	80 minutes without 4cell, choosing logFC >1 and p<=0.05 lists of GO categories associated with the genes, sorted by logFC top 20 up regulated
	20120223_EMB-0.20120223_EMB-30.20120223_EMB-90.20120411_EMB-60
	141	5515	protein	binding
	129	5634	nucleus
	102	3677	DNA	binding
	81	6355	regulation	of	transcription,	DNA-templated
	78	3700	sequence-specific	DNA	binding	transcription	factor	activity
	71	43565	sequence-specific	DNA	binding
	53	46982	protein	heterodimerization	activity
	53	6334	nucleosome	assembly
	53	786	nucleosome
	46	8152	metabolic	process
	46	5737	cytoplasm
	40	8270	zinc	ion	binding
	36	5622	intracellular
	36	3735	structural	constituent	of	ribosome
	35	5840	ribosome
	35	3824	catalytic	activity
	34	16021	integral	component	of	membrane
	34	16020	membrane
	34	6412	translation
	29	9792	embryo	development	ending	in	birth	or	egg	hatching
	20120223_EMB-90.20120411_EMB-60.20120411_EMB-120.20120223_EMB-180
	104	5515	protein	binding
	62	5634	nucleus
	55	3700	sequence-specific	DNA	binding	transcription	factor	activity
	54	6355	regulation	of	transcription,	DNA-templated
	50	43565	sequence-specific	DNA	binding
	39	3677	DNA	binding
	32	8270	zinc	ion	binding
	32	2119	nematode	larval	development
	30	42302	structural	constituent	of	cuticle
	30	40011	locomotion
	30	16020	membrane
	30	5737	cytoplasm
	23	9792	embryo	development	ending	in	birth	or	egg	hatching
	22	5524	ATP	binding
	21	3676	nucleic	acid	binding
	20	16021	integral	component	of	membrane
	19	10171	body	morphogenesis
	19	5509	calcium	ion	binding
	17	18991
	15	16772	transferase	activity,	transferring	phosphorus-containing	groups
	20120411_EMB-120.20120223_EMB-180.20120223_EMB-240.20120223_EMB-270
	58	5515	protein	binding
	37	5634	nucleus
	34	6355	regulation	of	transcription,	DNA-templated
	31	43565	sequence-specific	DNA	binding
	31	3700	sequence-specific	DNA	binding	transcription	factor	activity
	29	16020	membrane
	25	8270	zinc	ion	binding
	20	3677	DNA	binding
	16	43401	steroid	hormone	mediated	signaling	pathway
	16	3707	steroid	hormone	receptor	activity
	15	40011	locomotion
	14	16021	integral	component	of	membrane
	14	5524	ATP	binding
	13	7165	signal	transduction
	12	16772	transferase	activity,	transferring	phosphorus-containing	groups
	12	10171	body	morphogenesis
	12	6468	protein	phosphorylation
	12	5509	calcium	ion	binding
	12	4672	protein	kinase	activity
	11	55114	oxidation-reduction	process
	20120223_EMB-240.20120223_EMB-270.20120419_EMB-270.20120223_EMB-330
	131	5515	protein	binding
	86	16020	membrane
	74	5634	nucleus
	60	16021	integral	component	of	membrane
	54	8270	zinc	ion	binding
	54	6355	regulation	of	transcription,	DNA-templated
	53	3700	sequence-specific	DNA	binding	transcription	factor	activity
	50	43565	sequence-specific	DNA	binding
	35	40011	locomotion
	34	5524	ATP	binding
	32	43401	steroid	hormone	mediated	signaling	pathway
	32	3707	steroid	hormone	receptor	activity
	30	6810	transport
	30	5737	cytoplasm
	27	5886	plasma	membrane
	27	5509	calcium	ion	binding
	26	55085	transmembrane	transport
	26	16772	transferase	activity,	transferring	phosphorus-containing	groups
	26	3677	DNA	binding
	25	42302	structural	constituent	of	cuticle
	20120419_EMB-270.20120223_EMB-330.20120419_EMB-330.20120223_EMB-420
	105	5515	protein	binding
	88	16020	membrane
	49	16021	integral	component	of	membrane
	41	5634	nucleus
	34	5524	ATP	binding
	29	3700	sequence-specific	DNA	binding	transcription	factor	activity
	28	43565	sequence-specific	DNA	binding
	28	6355	regulation	of	transcription,	DNA-templated
	25	40011	locomotion
	25	8270	zinc	ion	binding
	24	16772	transferase	activity,	transferring	phosphorus-containing	groups
	23	6810	transport
	23	6468	protein	phosphorylation
	23	5737	cytoplasm
	23	5509	calcium	ion	binding
	23	4672	protein	kinase	activity
	21	6811	ion	transport
	20	5886	plasma	membrane
	19	55085	transmembrane	transport
	18	5615	extracellular	space
	20120419_EMB-330.20120223_EMB-420.20120223_EMB-480.20120419_EMB-420
	123	16020	membrane
	92	16021	integral	component	of	membrane
	84	5515	protein	binding
	45	6811	ion	transport
	40	6810	transport
	39	42302	structural	constituent	of	cuticle
	35	8270	zinc	ion	binding
	32	7186	G-protein	coupled	receptor	signaling	pathway
	32	6508	proteolysis
	32	5216	ion	channel	activity
	30	5524	ATP	binding
	29	5634	nucleus
	28	55085	transmembrane	transport
	28	30246	carbohydrate	binding
	28	5230	extracellular	ligand-gated	ion	channel	activity
	26	4930	G-protein	coupled	receptor	activity
	23	43565	sequence-specific	DNA	binding
	23	40011	locomotion
	22	30424	axon
	22	6355	regulation	of	transcription,	DNA-templated
	20120223_EMB-480.20120419_EMB-420.20120223_EMB-570.20120223_EMB-600
	75	42302	structural	constituent	of	cuticle
	25	5515	protein	binding
	22	16021	integral	component	of	membrane
	20	16020	membrane
	20	5737	cytoplasm
	19	5615	extracellular	space
	18	6508	proteolysis
	17	30246	carbohydrate	binding
	15	55114	oxidation-reduction	process
	13	8270	zinc	ion	binding
	10	6810	transport
	9	8237	metallopeptidase	activity
	9	4222	metalloendopeptidase	activity
	8	5506	iron	ion	binding
	7	43565	sequence-specific	DNA	binding
	7	43186	P	granule
	7	6355	regulation	of	transcription,	DNA-templated
	7	5576	extracellular	region
	7	3677	DNA	binding
	6	46872	metal	ion	binding
	20120223_EMB-570.20120223_EMB-600.L1.N2_L1-1
	180	5515	protein	binding
	142	16021	integral	component	of	membrane
	126	5524	ATP	binding
	119	16020	membrane
	101	5737	cytoplasm
	100	8152	metabolic	process
	97	5634	nucleus
	93	3824	catalytic	activity
	89	55114	oxidation-reduction	process
	78	6412	translation
	78	166	nucleotide	binding
	76	3735	structural	constituent	of	ribosome
	73	5622	intracellular
	72	5840	ribosome
	61	6810	transport
	59	30246	carbohydrate	binding
	59	16491	oxidoreductase	activity
	55	7186	G-protein	coupled	receptor	signaling	pathway
	53	8270	zinc	ion	binding
	49	4930	G-protein	coupled	receptor	activity
	80	minutes	without	4cell,	choosing	logFC	>=2	and	p<=0.05	lists	of	GO	categories	associated	with	the	genes,	sorted	by	logFC	top	20	down	regulated
	20120223_EMB-0.20120223_EMB-30.20120223_EMB-90.20120411_EMB-60
	43	5515	protein	binding
	33	5737	cytoplasm
	25	9792	embryo	development	ending	in	birth	or	egg	hatching
	23	43186	P	granule
	20	5634	nucleus
	20	5524	ATP	binding
	19	3676	nucleic	acid	binding
	16	46872	metal	ion	binding
	16	3723	RNA	binding
	15	3	reproduction
	12	6355	regulation	of	transcription,	DNA-templated
	12	5886	plasma	membrane
	12	166	nucleotide	binding
	11	8270	zinc	ion	binding
	11	3824	catalytic	activity
	10	16772	transferase	activity,	transferring	phosphorus-containing	groups
	10	16021	integral	component	of	membrane
	10	5488	binding
	10	3677	DNA	binding
	9	16020	membrane
	[...]
	20120223_EMB-90.20120411_EMB-60.20120411_EMB-120.20120223_EMB-180
	42	5515	protein	binding
	28	5634	nucleus
	26	6355	regulation	of	transcription,	DNA-templated
	23	3700	sequence-specific	DNA	binding	transcription	factor	activity
	12	46872	metal	ion	binding
	11	43565	sequence-specific	DNA	binding
	10	9792	embryo	development	ending	in	birth	or	egg	hatching
	10	3677	DNA	binding
	10	3	reproduction
	9	43186	P	granule
	9	8270	zinc	ion	binding
	7	30246	carbohydrate	binding
	7	5737	cytoplasm
	7	3676	nucleic	acid	binding
	5	60465
	5	46983	protein	dimerization	activity
	5	30968	endoplasmic	reticulum	unfolded	protein	response
	5	16021	integral	component	of	membrane
	5	6511	ubiquitin-dependent	protein	catabolic	process
	5	5524	ATP	binding
	[...]
	20120411_EMB-120.20120223_EMB-180.20120223_EMB-240.20120223_EMB-270
	46	5515	protein	binding
	32	42302	structural	constituent	of	cuticle
	17	6355	regulation	of	transcription,	DNA-templated
	16	3700	sequence-specific	DNA	binding	transcription	factor	activity
	12	5634	nucleus
	10	43565	sequence-specific	DNA	binding
	9	6511	ubiquitin-dependent	protein	catabolic	process
	6	8270	zinc	ion	binding
	6	3677	DNA	binding
	5	5737	cytoplasm
	4	60465
	4	16021	integral	component	of	membrane
	3	46872	metal	ion	binding
	3	16787	hydrolase	activity
	3	16020	membrane
	3	8152	metabolic	process
	3	7154	cell	communication
	3	5524	ATP	binding
	3	3824	catalytic	activity
	2	45944	positive	regulation	of	transcription	from	RNA	polymerase	II	promoter
	[...]
	20120223_EMB-240.20120223_EMB-270.20120419_EMB-270.20120223_EMB-330
	9	5515	protein	binding
	7	6355	regulation	of	transcription,	DNA-templated
	6	42302	structural	constituent	of	cuticle
	6	3700	sequence-specific	DNA	binding	transcription	factor	activity
	5	5634	nucleus
	4	43565	sequence-specific	DNA	binding
	3	6511	ubiquitin-dependent	protein	catabolic	process
	2	8270	zinc	ion	binding
	2	3677	DNA	binding
	1	60102	collagen	and	cuticulin-based	cuticle	extracellular	matrix
	1	45944	positive	regulation	of	transcription	from	RNA	polymerase	II	promoter
	1	43621	protein	self-association
	1	30674	protein	binding,	bridging
	1	10171	body	morphogenesis
	1	9792	embryo	development	ending	in	birth	or	egg	hatching
	1	8234	cysteine-type	peptidase	activity
	1	7493	endodermal	cell	fate	determination
	1	6914	autophagy
	1	6508	proteolysis
	1	6357	regulation	of	transcription	from	RNA	polymerase	II	promoter
	[...]
	20120419_EMB-270.20120223_EMB-330.20120419_EMB-330.20120223_EMB-420
	11	42302	structural	constituent	of	cuticle
	1	46982	protein	heterodimerization	activity
	1	43565	sequence-specific	DNA	binding
	1	6355	regulation	of	transcription,	DNA-templated
	1	6334	nucleosome	assembly
	1	3700	sequence-specific	DNA	binding	transcription	factor	activity
	1	3677	DNA	binding
	1	786	nucleosome
	[...]
	20120419_EMB-330.20120223_EMB-420.20120223_EMB-480.20120419_EMB-420
	6	5634	nucleus
	5	46982	protein	heterodimerization	activity
	5	6334	nucleosome	assembly
	5	3677	DNA	binding
	5	786	nucleosome
	2	5515	protein	binding
	1	50920	regulation	of	chemotaxis
	1	45944	positive	regulation	of	transcription	from	RNA	polymerase	II	promoter
	1	43565	sequence-specific	DNA	binding
	1	30182	neuron	differentiation
	1	16020	membrane
	1	7154	cell	communication
	1	5576	extracellular	region
	1	5179	hormone	activity
	1	3676	nucleic	acid	binding
	[...]
	20120223_EMB-480.20120419_EMB-420.20120223_EMB-570.20120223_EMB-600
	3	5515	protein	binding
	2	5737	cytoplasm
	1	46622	positive	regulation	of	organ	growth
	1	45793	positive	regulation	of	cell	size
	1	45138
	1	40018	positive	regulation	of	multicellular	organism	growth
	1	40012	regulation	of	locomotion
	1	35150	regulation	of	tube	size
	1	16331	morphogenesis	of	embryonic	epithelium
	1	16324
	1	16020	membrane
	1	10172	embryonic	body	morphogenesis
	1	10171	body	morphogenesis
	1	7156	homophilic	cell	adhesion	via	plasma	membrane	adhesion	molecules
	1	5886	plasma	membrane
	1	5604	basement	membrane
	1	5543	phospholipid	binding
	1	5509	calcium	ion	binding
	1	5198	structural	molecule	activity
	1	2119	nematode	larval	development
	[...]
	20120223_EMB-570.20120223_EMB-600.L1.N2_L1-1
	114	5634	nucleus
	100	5515	protein	binding
	84	3677	DNA	binding
	79	42302	structural	constituent	of	cuticle
	61	16020	membrane
	60	6334	nucleosome	assembly
	60	786	nucleosome
	59	46982	protein	heterodimerization	activity
	53	8270	zinc	ion	binding
	51	6355	regulation	of	transcription,	DNA-templated
	50	3700	sequence-specific	DNA	binding	transcription	factor	activity
	49	43565	sequence-specific	DNA	binding
	35	5737	cytoplasm
	32	6508	proteolysis
	26	16021	integral	component	of	membrane
	24	9792	embryo	development	ending	in	birth	or	egg	hatching
	24	5509	calcium	ion	binding
	24	3707	steroid	hormone	receptor	activity
	23	10171	body	morphogenesis
	21	43401	steroid	hormone	mediated	signaling	pathway
	[...]
	80	minutes	without	4cell,	choosing	logFC	>=2	and	p<=0.05	lists	of	GO	categories	associated	with	the	genes,	sorted	by	logFC	top	20	up	regulated
	20120223_EMB-0.20120223_EMB-30.20120223_EMB-90.20120411_EMB-60
	92	5634	nucleus
	77	5515	protein	binding
	71	3677	DNA	binding
	60	6355	regulation	of	transcription,	DNA-templated
	60	3700	sequence-specific	DNA	binding	transcription	factor	activity
	55	43565	sequence-specific	DNA	binding
	38	6334	nucleosome	assembly
	38	786	nucleosome
	37	46982	protein	heterodimerization	activity
	37	8152	metabolic	process
	24	3824	catalytic	activity
	23	8270	zinc	ion	binding
	18	55114	oxidation-reduction	process
	18	16021	integral	component	of	membrane
	17	16020	membrane
	16	5622	intracellular
	15	9792	embryo	development	ending	in	birth	or	egg	hatching
	15	2119	nematode	larval	development
	14	16758	transferase	activity,	transferring	hexosyl	groups
	14	16491	oxidoreductase	activity
	[...]
	20120223_EMB-90.20120411_EMB-60.20120411_EMB-120.20120223_EMB-180
	34	5634	nucleus
	34	5515	protein	binding
	31	6355	regulation	of	transcription,	DNA-templated
	30	3700	sequence-specific	DNA	binding	transcription	factor	activity
	28	43565	sequence-specific	DNA	binding
	27	42302	structural	constituent	of	cuticle
	23	3677	DNA	binding
	21	8270	zinc	ion	binding
	14	16021	integral	component	of	membrane
	12	16020	membrane
	10	10171	body	morphogenesis
	10	2119	nematode	larval	development
	9	40011	locomotion
	9	9792	embryo	development	ending	in	birth	or	egg	hatching
	9	3676	nucleic	acid	binding
	8	43401	steroid	hormone	mediated	signaling	pathway
	8	5737	cytoplasm
	8	5509	calcium	ion	binding
	8	3707	steroid	hormone	receptor	activity
	7	45944	positive	regulation	of	transcription	from	RNA	polymerase	II	promoter
	[...]
	20120411_EMB-120.20120223_EMB-180.20120223_EMB-240.20120223_EMB-270
	5	16020	membrane
	5	5634	nucleus
	4	8270	zinc	ion	binding
	4	5737	cytoplasm
	4	3700	sequence-specific	DNA	binding	transcription	factor	activity
	3	55114	oxidation-reduction	process
	3	43565	sequence-specific	DNA	binding
	3	43401	steroid	hormone	mediated	signaling	pathway
	3	42302	structural	constituent	of	cuticle
	3	6810	transport
	3	6355	regulation	of	transcription,	DNA-templated
	3	5515	protein	binding
	3	3707	steroid	hormone	receptor	activity
	2	42329	structural	constituent	of	collagen	and	cuticulin-based	cuticle
	2	40002	collagen	and	cuticulin-based	cuticle	development
	2	30246	carbohydrate	binding
	2	16491	oxidoreductase	activity
	2	16021	integral	component	of	membrane
	2	10171	body	morphogenesis
	2	8152	metabolic	process
	[...]
	20120223_EMB-240.20120223_EMB-270.20120419_EMB-270.20120223_EMB-330
	48	5515	protein	binding
	30	16020	membrane
	20	16021	integral	component	of	membrane
	16	5634	nucleus
	13	42302	structural	constituent	of	cuticle
	13	5737	cytoplasm
	13	5524	ATP	binding
	12	40011	locomotion
	12	6810	transport
	11	8270	zinc	ion	binding
	10	8289	lipid	binding
	10	5576	extracellular	region
	9	6811	ion	transport
	9	5615	extracellular	space
	9	5198	structural	molecule	activity
	8	55085	transmembrane	transport
	8	43565	sequence-specific	DNA	binding
	8	43025	neuronal	cell	body
	8	30424	axon
	8	16772	transferase	activity,	transferring	phosphorus-containing	groups
	[...]
	20120419_EMB-270.20120223_EMB-330.20120419_EMB-330.20120223_EMB-420
	13	16020	membrane
	13	5515	protein	binding
	9	16021	integral	component	of	membrane
	6	6508	proteolysis
	6	5634	nucleus
	6	5615	extracellular	space
	5	30246	carbohydrate	binding
	5	8233	peptidase	activity
	5	5737	cytoplasm
	5	2119	nematode	larval	development
	4	43565	sequence-specific	DNA	binding
	4	43025	neuronal	cell	body
	4	20037	heme	binding
	4	18996	molting	cycle,	collagen	and	cuticulin-based	cuticle
	4	7275	multicellular	organismal	development
	4	7154	cell	communication
	4	5524	ATP	binding
	4	5509	calcium	ion	binding
	4	5506	iron	ion	binding
	3	55120	striated	muscle	dense	body
	[...]
	20120419_EMB-330.20120223_EMB-420.20120223_EMB-480.20120419_EMB-420
	33	16020	membrane
	30	42302	structural	constituent	of	cuticle
	25	16021	integral	component	of	membrane
	16	6508	proteolysis
	13	6811	ion	transport
	11	8270	zinc	ion	binding
	11	6810	transport
	11	5515	protein	binding
	10	7186	G-protein	coupled	receptor	signaling	pathway
	10	5615	extracellular	space
	10	5216	ion	channel	activity
	9	5230	extracellular	ligand-gated	ion	channel	activity
	8	55085	transmembrane	transport
	8	40011	locomotion
	8	30246	carbohydrate	binding
	7	20037	heme	binding
	7	8237	metallopeptidase	activity
	7	5576	extracellular	region
	7	4222	metalloendopeptidase	activity
	6	43565	sequence-specific	DNA	binding
	[...]
	20120223_EMB-480.20120419_EMB-420.20120223_EMB-570.20120223_EMB-600
	61	42302	structural	constituent	of	cuticle
	6	30968	endoplasmic	reticulum	unfolded	protein	response
	5	45087	innate	immune	response
	5	5615	extracellular	space
	4	10171	body	morphogenesis
	3	50832	defense	response	to	fungus
	3	40002	collagen	and	cuticulin-based	cuticle	development
	3	6508	proteolysis
	3	5198	structural	molecule	activity
	2	50829	defense	response	to	Gram-negative	bacterium
	2	30246	carbohydrate	binding
	2	9611	response	to	wounding
	2	8340	determination	of	adult	lifespan
	2	8234	cysteine-type	peptidase	activity
	2	5515	protein	binding
	1	61096
	1	60111	alae	of	collagen	and	cuticulin-based	cuticle	extracellular	matrix
	1	60107	annuli	extracellular	matrix
	1	46983	protein	dimerization	activity
	1	45138
	[...]
	20120223_EMB-570.20120223_EMB-600.L1.N2_L1-1
	87	16021	integral	component	of	membrane
	68	5515	protein	binding
	64	16020	membrane
	60	8152	metabolic	process
	54	55114	oxidation-reduction	process
	53	3735	structural	constituent	of	ribosome
	51	30246	carbohydrate	binding
	51	5840	ribosome
	50	6412	translation
	44	5622	intracellular
	41	3824	catalytic	activity
	35	16491	oxidoreductase	activity
	35	7186	G-protein	coupled	receptor	signaling	pathway
	32	6810	transport
	31	4930	G-protein	coupled	receptor	activity
	30	20037	heme	binding
	30	6508	proteolysis
	29	55085	transmembrane	transport
	28	5524	ATP	binding
	27	5737	cytoplasm
	[...]

## Sheet: GeneFamiliesByTime
fbx	genes	logFC>=1	p<=0.05	down-regulated	per	comparison
	number of fbx's down regulated
20120223_EMB-0.20120223_EMB-30.20120223_EMB-90.20120411_EMB-60	3
20120223_EMB-90.20120411_EMB-60.20120411_EMB-120.20120223_EMB-180	38
20120411_EMB-120.20120223_EMB-180.20120223_EMB-240.20120223_EMB-270	102
20120223_EMB-240.20120223_EMB-270.20120419_EMB-270.20120223_EMB-330	46
20120419_EMB-270.20120223_EMB-330.20120419_EMB-330.20120223_EMB-420	14
20120419_EMB-330.20120223_EMB-420.20120223_EMB-480.20120419_EMB-420	14
20120223_EMB-480.20120419_EMB-420.20120223_EMB-570.20120223_EMB-600	5
20120223_EMB-570.20120223_EMB-600.L1.N2_L1-1	55
fbx	genes	logFC>=1	p<=0.05	up-regulated	per	comparison
	number of fbx's up regulated
20120223_EMB-0.20120223_EMB-30.20120223_EMB-90.20120411_EMB-60	124
20120223_EMB-90.20120411_EMB-60.20120411_EMB-120.20120223_EMB-180	2
20120411_EMB-120.20120223_EMB-180.20120223_EMB-240.20120223_EMB-270	3
20120223_EMB-240.20120223_EMB-270.20120419_EMB-270.20120223_EMB-330	7
20120419_EMB-270.20120223_EMB-330.20120419_EMB-330.20120223_EMB-420	5
20120419_EMB-330.20120223_EMB-420.20120223_EMB-480.20120419_EMB-420	3
20120223_EMB-480.20120419_EMB-420.20120223_EMB-570.20120223_EMB-600	12
20120223_EMB-570.20120223_EMB-600.L1.N2_L1-1	31
unc	genes	logFC>=1	p<=0.05	down-regulated	per	comparison
	number of unc's down regulated
20120223_EMB-0.20120223_EMB-30.20120223_EMB-90.20120411_EMB-60	10
20120223_EMB-90.20120411_EMB-60.20120411_EMB-120.20120223_EMB-180	1
20120411_EMB-120.20120223_EMB-180.20120223_EMB-240.20120223_EMB-270	0
20120223_EMB-240.20120223_EMB-270.20120419_EMB-270.20120223_EMB-330	1
20120419_EMB-270.20120223_EMB-330.20120419_EMB-330.20120223_EMB-420	2
20120419_EMB-330.20120223_EMB-420.20120223_EMB-480.20120419_EMB-420	2
20120223_EMB-480.20120419_EMB-420.20120223_EMB-570.20120223_EMB-600	6
20120223_EMB-570.20120223_EMB-600.L1.N2_L1-1	28
unc	genes	logFC>=1	p<=0.05	up-regulated	per	comparison				down
	number of unc's up regulated
20120223_EMB-0.20120223_EMB-30.20120223_EMB-90.20120411_EMB-60	13
20120223_EMB-90.20120411_EMB-60.20120411_EMB-120.20120223_EMB-180	23
20120411_EMB-120.20120223_EMB-180.20120223_EMB-240.20120223_EMB-270	16
20120223_EMB-240.20120223_EMB-270.20120419_EMB-270.20120223_EMB-330	29
20120419_EMB-270.20120223_EMB-330.20120419_EMB-330.20120223_EMB-420	22
20120419_EMB-330.20120223_EMB-420.20120223_EMB-480.20120419_EMB-420	25
20120223_EMB-480.20120419_EMB-420.20120223_EMB-570.20120223_EMB-600	3
20120223_EMB-570.20120223_EMB-600.L1.N2_L1-1	5
									fbx
fbx	down	regulated						average time		fbx	down	up
20120223_EMB-0.20120223_EMB-30.20120223_EMB-90.20120411_EMB-60	3					35min,126min			20120223_EMB-0.20120223_EMB-30.20120223_EMB-90.20120411_EMB-60	53min,143min	3	124
20120223_EMB-90.20120411_EMB-60.20120411_EMB-120.20120223_EMB-180	38					126min,213min			20120223_EMB-90.20120411_EMB-60.20120411_EMB-120.20120223_EMB-180	143min,227min	38	2
20120411_EMB-120.20120223_EMB-180.20120223_EMB-240.20120223_EMB-270	102					213min,279min			20120411_EMB-120.20120223_EMB-180.20120223_EMB-240.20120223_EMB-270	227min,314min	102	3
20120223_EMB-240.20120223_EMB-270.20120419_EMB-270.20120223_EMB-330	46					279min,388min			20120223_EMB-240.20120223_EMB-270.20120419_EMB-270.20120223_EMB-330	314min,395min	46	7
20120419_EMB-270.20120223_EMB-330.20120419_EMB-330.20120223_EMB-420	14					388min,472min			20120419_EMB-270.20120223_EMB-330.20120419_EMB-330.20120223_EMB-420	395min,483min	14	5
20120419_EMB-330.20120223_EMB-420.20120223_EMB-480.20120419_EMB-420	14								20120419_EMB-330.20120223_EMB-420.20120223_EMB-480.20120419_EMB-420	483min,574min	14	3
20120223_EMB-480.20120419_EMB-420.20120223_EMB-570.20120223_EMB-600	5								20120223_EMB-480.20120419_EMB-420.20120223_EMB-570.20120223_EMB-600	574min,674min	5	12
20120223_EMB-570.20120223_EMB-600.L1.N2_L1-1	55								20120223_EMB-570.20120223_EMB-600.L1.N2_L1-1	674min,L1	55	31
fbx	up	regulated
20120223_EMB-0.20120223_EMB-30.20120223_EMB-90.20120411_EMB-60	124
20120223_EMB-90.20120411_EMB-60.20120411_EMB-120.20120223_EMB-180	2									tbx	down	up
20120411_EMB-120.20120223_EMB-180.20120223_EMB-240.20120223_EMB-270	3								20120223_EMB-0.20120223_EMB-30.20120223_EMB-90.20120411_EMB-60	53min,143min	1	4
20120223_EMB-240.20120223_EMB-270.20120419_EMB-270.20120223_EMB-330	7								20120223_EMB-90.20120411_EMB-60.20120411_EMB-120.20120223_EMB-180	143min,227min	11	1
20120419_EMB-270.20120223_EMB-330.20120419_EMB-330.20120223_EMB-420	5								20120411_EMB-120.20120223_EMB-180.20120223_EMB-240.20120223_EMB-270	227min,314min	5	0
20120419_EMB-330.20120223_EMB-420.20120223_EMB-480.20120419_EMB-420	3								20120223_EMB-240.20120223_EMB-270.20120419_EMB-270.20120223_EMB-330	314min,395min	4	0
20120223_EMB-480.20120419_EMB-420.20120223_EMB-570.20120223_EMB-600	12								20120419_EMB-270.20120223_EMB-330.20120419_EMB-330.20120223_EMB-420	395min,483min	3	0
20120223_EMB-570.20120223_EMB-600.L1.N2_L1-1	31								20120419_EMB-330.20120223_EMB-420.20120223_EMB-480.20120419_EMB-420	483min,574min	0	0
tbx	down	regulated							20120223_EMB-480.20120419_EMB-420.20120223_EMB-570.20120223_EMB-600	574min,674min	0	0
20120223_EMB-0.20120223_EMB-30.20120223_EMB-90.20120411_EMB-60	1								20120223_EMB-570.20120223_EMB-600.L1.N2_L1-1	674min,L1	3	0
20120223_EMB-90.20120411_EMB-60.20120411_EMB-120.20120223_EMB-180	11
20120411_EMB-120.20120223_EMB-180.20120223_EMB-240.20120223_EMB-270	5									ceh	down	up
20120223_EMB-240.20120223_EMB-270.20120419_EMB-270.20120223_EMB-330	4								20120223_EMB-0.20120223_EMB-30.20120223_EMB-90.20120411_EMB-60	53min,143min	1	17
20120419_EMB-270.20120223_EMB-330.20120419_EMB-330.20120223_EMB-420	3								20120223_EMB-90.20120411_EMB-60.20120411_EMB-120.20120223_EMB-180	143min,227min	1	13
20120419_EMB-330.20120223_EMB-420.20120223_EMB-480.20120419_EMB-420	0								20120411_EMB-120.20120223_EMB-180.20120223_EMB-240.20120223_EMB-270	227min,314min	5	6
20120223_EMB-480.20120419_EMB-420.20120223_EMB-570.20120223_EMB-600	0								20120223_EMB-240.20120223_EMB-270.20120419_EMB-270.20120223_EMB-330	314min,395min	3	7
20120223_EMB-570.20120223_EMB-600.L1.N2_L1-1	3								20120419_EMB-270.20120223_EMB-330.20120419_EMB-330.20120223_EMB-420	395min,483min	2	5
tbx	up	regulated							20120419_EMB-330.20120223_EMB-420.20120223_EMB-480.20120419_EMB-420	483min,574min	0	2
20120223_EMB-0.20120223_EMB-30.20120223_EMB-90.20120411_EMB-60	4								20120223_EMB-480.20120419_EMB-420.20120223_EMB-570.20120223_EMB-600	574min,674min	3	1
20120223_EMB-90.20120411_EMB-60.20120411_EMB-120.20120223_EMB-180	1								20120223_EMB-570.20120223_EMB-600.L1.N2_L1-1	674min,L1	19	2
20120411_EMB-120.20120223_EMB-180.20120223_EMB-240.20120223_EMB-270	0
20120223_EMB-240.20120223_EMB-270.20120419_EMB-270.20120223_EMB-330	0
20120419_EMB-270.20120223_EMB-330.20120419_EMB-330.20120223_EMB-420	0
20120419_EMB-330.20120223_EMB-420.20120223_EMB-480.20120419_EMB-420	0
20120223_EMB-480.20120419_EMB-420.20120223_EMB-570.20120223_EMB-600	0
20120223_EMB-570.20120223_EMB-600.L1.N2_L1-1	0
ceh	down	regulated
20120223_EMB-0.20120223_EMB-30.20120223_EMB-90.20120411_EMB-60	1
20120223_EMB-90.20120411_EMB-60.20120411_EMB-120.20120223_EMB-180	1
20120411_EMB-120.20120223_EMB-180.20120223_EMB-240.20120223_EMB-270	5
20120223_EMB-240.20120223_EMB-270.20120419_EMB-270.20120223_EMB-330	3
20120419_EMB-270.20120223_EMB-330.20120419_EMB-330.20120223_EMB-420	2
20120419_EMB-330.20120223_EMB-420.20120223_EMB-480.20120419_EMB-420	0
20120223_EMB-480.20120419_EMB-420.20120223_EMB-570.20120223_EMB-600	3
20120223_EMB-570.20120223_EMB-600.L1.N2_L1-1	19
ceh	up	regulated
20120223_EMB-0.20120223_EMB-30.20120223_EMB-90.20120411_EMB-60	17
20120223_EMB-90.20120411_EMB-60.20120411_EMB-120.20120223_EMB-180	13
20120411_EMB-120.20120223_EMB-180.20120223_EMB-240.20120223_EMB-270	6
20120223_EMB-240.20120223_EMB-270.20120419_EMB-270.20120223_EMB-330	7
20120419_EMB-270.20120223_EMB-330.20120419_EMB-330.20120223_EMB-420	5
20120419_EMB-330.20120223_EMB-420.20120223_EMB-480.20120419_EMB-420	2
20120223_EMB-480.20120419_EMB-420.20120223_EMB-570.20120223_EMB-600	1
20120223_EMB-570.20120223_EMB-600.L1.N2_L1-1	2
acr	down	up
53min,143min	1	1
143min,227min	0	1
227min,314min	0	1
314min,395min	0	2
395min,483min	0	3
483min,574min	0	7
574min,674min	0	1
674min,L1	7	6
arrd	down	up
53min,143min	3	3
143min,227min	2	1
227min,314min	2	0
314min,395min	1	0
395min,483min	1	5
483min,574min	1	4
574min,674min	0	2
674min,L1	4	9
bath	down	up
53min,143min	2	5
143min,227min	8	0
227min,314min	2	0
314min,395min	0	0
395min,483min	0	0
483min,574min	2	2
574min,674min	0	0
674min,L1	6	3
btb	down	up
53min,143min	1	6
143min,227min	0	0
227min,314min	6	1
314min,395min	3	0
395min,483min	2	0
483min,574min	0	0
574min,674min	0	0
674min,L1	3	5
ceh	down	up
53min,143min	1	17
143min,227min	1	13
227min,314min	5	6
314min,395min	3	7
395min,483min	2	5
483min,574min	0	2
574min,674min	3	1
674min,L1	19	2
clec	down	up
53min,143min	0	9
143min,227min	6	1
227min,314min	3	2
314min,395min	2	9
395min,483min	2	7
483min,574min	2	20
574min,674min	4	12
674min,L1	12	52
col	down	up
53min,143min	0	9
143min,227min	0	32
227min,314min	34	11
314min,395min	6	25
395min,483min	13	12
483min,574min	0	45
574min,674min	3	77
674min,L1	87	26
cutl	down	up
53min,143min	0	5
143min,227min	0	5
227min,314min	0	6
314min,395min	1	10
395min,483min	1	9
483min,574min	1	6
574min,674min	4	3
674min,L1	22	1
cyp	down	up
53min,143min	1	4
143min,227min	1	0
227min,314min	0	3
314min,395min	0	5
395min,483min	2	1
483min,574min	0	4
574min,674min	0	2
674min,L1	8	18
daf	down	up
53min,143min	5	2
143min,227min	0	1
227min,314min	0	0
314min,395min	0	3
395min,483min	0	4
483min,574min	0	2
574min,674min	2	0
674min,L1	1	7
dhs	down	up
53min,143min	2	8
143min,227min	2	2
227min,314min	2	1
314min,395min	0	1
395min,483min	0	1
483min,574min	1	0
574min,674min	0	0
674min,L1	5	16
dnj	down	up
53min,143min	7	3
143min,227min	2	1
227min,314min	0	1
314min,395min	0	0
395min,483min	0	0
483min,574min	0	0
574min,674min	1	1
674min,L1	3	4
dpy	down	up
53min,143min	0	6
143min,227min	0	7
227min,314min	0	6
314min,395min	0	5
395min,483min	0	0
483min,574min	0	0
574min,674min	4	2
674min,L1	12	2
egl	down	up
53min,143min	1	4
143min,227min	0	4
227min,314min	0	3
314min,395min	0	6
395min,483min	0	7
483min,574min	0	4
574min,674min	0	0
674min,L1	8	6
fipr	down	up
53min,143min	0	2
143min,227min	1	0
227min,314min	1	0
314min,395min	0	0
395min,483min	0	1
483min,574min	0	2
574min,674min	1	2
674min,L1	0	11
flp	down	up
53min,143min	0	5
143min,227min	1	1
227min,314min	4	0
314min,395min	0	2
395min,483min	0	3
483min,574min	0	17
574min,674min	0	19
674min,L1	0	25
gcy	down	up
53min,143min	1	0
143min,227min	0	0
227min,314min	0	0
314min,395min	0	1
395min,483min	0	1
483min,574min	0	7
574min,674min	1	0
674min,L1	4	7
glb	down	up
53min,143min	0	2
143min,227min	2	1
227min,314min	1	1
314min,395min	0	3
395min,483min	0	4
483min,574min	0	8
574min,674min	0	3
674min,L1	2	18
gly	down	up
53min,143min	13	13
143min,227min	5	5
227min,314min	3	8
314min,395min	3	13
395min,483min	6	13
483min,574min	5	9
574min,674min	3	4
674min,L1	16	21
grl	down	up
53min,143min	0	2
143min,227min	0	4
227min,314min	5	0
314min,395min	0	2
395min,483min	0	6
483min,574min	0	11
574min,674min	0	7
674min,L1	15	2
gst	down	up
53min,143min	1	6
143min,227min	3	0
227min,314min	0	1
314min,395min	0	5
395min,483min	0	5
483min,574min	0	8
574min,674min	1	5
674min,L1	2	21
his	down	up
53min,143min	5	53
143min,227min	5	3
227min,314min	7	1
314min,395min	7	2
395min,483min	47	2
483min,574min	49	0
574min,674min	0	1
674min,L1	61	7
hlh	down	up
53min,143min	1	7
143min,227min	5	3
227min,314min	1	1
314min,395min	1	4
395min,483min	0	3
483min,574min	4	1
574min,674min	0	1
674min,L1	12	2
ins	down	up
53min,143min	36	25
143min,227min	19	28
227min,314min	11	18
314min,395min	8	46
395min,483min	10	40
483min,574min	3	35
574min,674min	13	13
674min,L1	80	66
kin	down	up
53min,143min	46	27
143min,227min	20	19
227min,314min	12	18
314min,395min	5	32
395min,483min	15	33
483min,574min	11	28
574min,674min	15	4
674min,L1	54	62
let	down	up
53min,143min	5	2
143min,227min	2	7
227min,314min	0	6
314min,395min	1	6
395min,483min	0	4
483min,574min	0	3
574min,674min	8	0
674min,L1	7	6
lgc	down	up
53min,143min	0	0
143min,227min	0	1
227min,314min	1	2
314min,395min	0	6
395min,483min	0	7
483min,574min	0	12
574min,674min	0	4
674min,L1	8	11
lin	down	up
53min,143min	18	29
143min,227min	10	17
227min,314min	17	15
314min,395min	11	45
395min,483min	11	36
483min,574min	10	35
574min,674min	8	12
674min,L1	51	48
math	down	up
53min,143min	0	3
143min,227min	1	0
227min,314min	3	1
314min,395min	2	0
395min,483min	0	3
483min,574min	0	4
574min,674min	0	0
674min,L1	4	4
mdt	down	up
53min,143min	3	1
143min,227min	4	0
227min,314min	2	0
314min,395min	0	0
395min,483min	0	0
483min,574min	1	0
574min,674min	0	1
674min,L1	1	2
msp	down	up
53min,143min	1	0
143min,227min	0	0
227min,314min	0	0
314min,395min	0	0
395min,483min	0	0
483min,574min	0	0
574min,674min	0	2
674min,L1	12	1
nas	down	up
53min,143min	60	61
143min,227min	26	25
227min,314min	20	32
314min,395min	8	46
395min,483min	16	39
483min,574min	18	46
574min,674min	15	23
674min,L1	89	167
nhr	down	up
53min,143min	7	13
143min,227min	2	11
227min,314min	2	16
314min,395min	2	30
395min,483min	2	13
483min,574min	5	13
574min,674min	2	0
674min,L1	36	22
nlp	down	up
53min,143min	0	9
143min,227min	1	2
227min,314min	6	1
314min,395min	1	2
395min,483min	0	9
483min,574min	0	20
574min,674min	2	18
674min,L1	1	36
npp	down	up
53min,143min	2	0
143min,227min	0	0
227min,314min	0	0
314min,395min	0	0
395min,483min	0	0
483min,574min	0	0
574min,674min	0	0
674min,L1	0	7
oac	down	up
53min,143min	3	4
143min,227min	2	2
227min,314min	3	2
314min,395min	3	2
395min,483min	0	3
483min,574min	0	8
574min,674min	1	2
674min,L1	9	12
pqn	down	up
53min,143min	2	3
143min,227min	4	2
227min,314min	3	1
314min,395min	0	6
395min,483min	0	15
483min,574min	0	16
574min,674min	5	9
674min,L1	20	13
ptr	down	up
53min,143min	1	1
143min,227min	0	3
227min,314min	0	5
314min,395min	0	9
395min,483min	0	10
483min,574min	0	7
574min,674min	3	1
674min,L1	14	5
rpl	down	up
53min,143min	0	19
143min,227min	3	0
227min,314min	4	0
314min,395min	0	0
395min,483min	0	2
483min,574min	0	0
574min,674min	0	0
674min,L1	0	38
rps	down	up
53min,143min	0	17
143min,227min	0	0
227min,314min	2	0
314min,395min	0	0
395min,483min	0	1
483min,574min	0	0
574min,674min	0	0
674min,L1	0	28
scl	down	up
53min,143min	1	1
143min,227min	3	0
227min,314min	0	1
314min,395min	0	1
395min,483min	0	0
483min,574min	0	0
574min,674min	0	0
674min,L1	0	8
sdz	down	up
53min,143min	0	22
143min,227min	16	0
227min,314min	24	0
314min,395min	8	1
395min,483min	4	2
483min,574min	0	0
574min,674min	0	1
674min,L1	7	1
set	down	up
53min,143min	7	3
143min,227min	4	1
227min,314min	3	2
314min,395min	2	1
395min,483min	2	0
483min,574min	0	0
574min,674min	1	0
674min,L1	8	2
skr	down	up
53min,143min	1	12
143min,227min	5	0
227min,314min	10	0
314min,395min	7	0
395min,483min	3	1
483min,574min	2	0
574min,674min	0	1
674min,L1	1	4
spp	down	up
53min,143min	0	2
143min,227min	0	2
227min,314min	0	0
314min,395min	0	6
395min,483min	0	8
483min,574min	0	3
574min,674min	0	6
674min,L1	5	12
sr	down	up
53min,143min	2	14
143min,227min	9	0
227min,314min	5	3
314min,395min	1	10
395min,483min	2	9
483min,574min	0	13
574min,674min	7	5
674min,L1	31	28
str	down	up
53min,143min	6	3
143min,227min	7	4
227min,314min	3	2
314min,395min	2	7
395min,483min	2	9
483min,574min	2	7
574min,674min	2	0
674min,L1	19	8
tag	down	up
53min,143min	14	16
143min,227min	9	9
227min,314min	1	8
314min,395min	1	12
395min,483min	1	14
483min,574min	1	8
574min,674min	7	3
674min,L1	23	31
tbx	down	up
53min,143min	1	4
143min,227min	11	1
227min,314min	5	0
314min,395min	4	0
395min,483min	3	0
483min,574min	0	0
574min,674min	0	0
674min,L1	3	0
tsp	down	up
53min,143min	0	4
143min,227min	0	3
227min,314min	0	2
314min,395min	0	5
395min,483min	0	1
483min,574min	0	1
574min,674min	0	1
674min,L1	5	3
ttr	down	up
53min,143min	0	10
143min,227min	3	3
227min,314min	1	0
314min,395min	0	13
395min,483min	0	14
483min,574min	2	12
574min,674min	1	16
674min,L1	13	22
twk	down	up
53min,143min	0	0
143min,227min	0	0
227min,314min	1	0
314min,395min	0	4
395min,483min	0	7
483min,574min	0	11
574min,674min	0	0
674min,L1	3	9
ubc	down	up
53min,143min	4	1
143min,227min	2	0
227min,314min	1	0
314min,395min	0	2
395min,483min	0	0
483min,574min	0	0
574min,674min	0	1
674min,L1	2	4
ugt	down	up
53min,143min	0	14
143min,227min	1	2
227min,314min	3	4
314min,395min	2	2
395min,483min	0	3
483min,574min	4	3
574min,674min	2	2
674min,L1	4	26
unc	down	up
53min,143min	10	13
143min,227min	1	23
227min,314min	0	16
314min,395min	1	29
395min,483min	2	22
483min,574min	2	25
574min,674min	6	3
674min,L1	28	5
vps	down	up
53min,143min	3	1
143min,227min	3	0
227min,314min	0	0
314min,395min	0	0
395min,483min	0	0
483min,574min	0	0
574min,674min	1	0
674min,L1	0	1
ztf	down	up
53min,143min	5	5
143min,227min	3	5
227min,314min	1	0
314min,395min	0	2
395min,483min	1	2
483min,574min	2	0
574min,674min	1	0
674min,L1	8	3
