# Supplementary material for: The time-resolved transcriptome of C. elegans
Source: Genome Res. 2016 Oct;26(10):1441–50. doi: 10.1101/gr.202663.115 (PMC5052054; doi:10.1101/gr.202663.115)
Supplement: Supplemental Material [file supp_gr.202663.115_Supplemental_Table_S5.xlsx]

## Sheet: GONameFixed
Term	Description	Type	min83_down	min122_down	min161_down	min199_down	min238_down	min277_down	min316_down	min355_down	min393_down	min432_down	min471_down	min510_down	min548_down	min587_down	min626_down	min665_down	min83_up	min122_up	min161_up	min199_up	min238_up	min277_up	min316_up	min355_up	min393_up	min432_up	min471_up	min510_up	min548_up	min587_up	min626_up	min665_up	Feb_0_30.Feb_90May_60_down	Feb_90May_60.May_120_Feb_180_down	May_120_Feb_180.Feb_240_270_down	Feb_240_270_May_270_Feb_330_down	May_270_Feb_330.May_330_Feb_420_down	May_330_Feb_420.Feb_480_May_420_down	Feb_480May_420.Feb_570_600_down	cFeb_570_600.L1_down	Feb_0_30.Feb_90May_60_up	Feb_90May_60.May_120_Feb_180_up	May_120_Feb_180.Feb_240_270_up	Feb_240_270_May_270_Feb_330_up	May_270_Feb_330.May_330_Feb_420_up	May_330_Feb_420.Feb_480_May_420_up	Feb_480May_420.Feb_570_600_up
GO:0000003	reproduction	biological_process	1.8944e-33	1.5136e-52	9.664e-39	1	1	0.0024096	6.88e-18	5.088e-07	0.0022496	0.00024256	1	1	1	9.216e-05	0.0014464	1	1	3.152e-09	3.616e-08	1	1	1	1	1	1	1	1	1	1	1	1	0.001472	4.48e-33	2.1024e-05	1.408e-06	1.9872e-26	7.424e-30	3.84e-16	6.432e-16	1	0.0027232	3.616e-06	1	1	1	1	1
GO:0000018	regulation of DNA recombination	biological_process	0.0027328	0.001232	1	1	1	1	1	1	1	1	1	1	1	1	1	1	1	1	1	1	1	1	1	1	1	1	1	1	1	1	1	1	0.0012672	1	1	1	1	1	1	1	1	1	1	1	1	1	1
GO:0000036	ACP phosphopantetheine attachment site binding involved in fatty acid biosynthetic process	molecular_function	1	1	1	1	1	1	1	1	1	1	1	1	1	1	1	1	1	1	1	1	1	1	1	1	1	1	1	1	1	1	1	1	1	1	1	1	1	1	1	1	1	1	1	1	1	1	1
GO:0000041	transition metal ion transport	biological_process	1	1	1	1	1	1	1	1	1	1	1	1	1	1	1	1	1	1	1	1	1	1	1	1	1	1	1	1	1	1	1	1	1	1	1	1	1	1	1	1	1	1	1	1	1	1	1
GO:0000049	tRNA binding	molecular_function	1	1	1	1	1	1	1	1	1	1	1	1	1	1	1	1	1	1	1	1	1	1	1	1	1	1	1	1	1	1	1	1	1	1	1	1	1	1	1	1	1	1	1	1	1	1	1
GO:0000062	fatty-acyl-CoA binding	molecular_function	1	1	1	1	1	1	1	1	1	1	1	1	1	1	1	1	1	1	1	1	1	1	1	1	1	1	1	1	1	1	1	1	1	1	1	1	1	1	1	1	1	1	1	1	1	1	1
GO:0000070	mitotic sister chromatid segregation	biological_process	1	1	1	1	1	1.232e-07	0.00808723	1	1	1	1	1	1	1	1	1	1	1	1	1	1	1	1	1	1	1	1	1	1	1	1	1	1	1	1	1.408e-08	4.352e-11	0.00502112	1	1	1	1	1	1	1	1	1
GO:0000075	cell cycle checkpoint	biological_process	1	1	1	1	1	1	1	1	1	1	1	1	1	1	1	1	1	1	1	1	1	1	1	1	1	1	1	1	1	1	1	1	1	1	1	6.048e-05	0.0029408	1	1	1	1	1	1	1	1	1	1
GO:0000077	DNA damage checkpoint	biological_process	1	1	1	1	1	1	1	1	1	1	1	1	1	1	1	1	1	1	1	1	1	1	1	1	1	1	1	1	1	1	1	1	1	1	1	1	1	1	1	1	1	1	1	1	1	1	1
GO:0000087	mitotic M phase	biological_process	1	1	0.0029088	1	1	1.0368e-05	1.1296e-07	1	1	1	1	1	1	1	1	1	1	1	1	1	1	1	1	1	1	1	1	1	1	1	1	1	1	1	1	5.92e-12	3.008e-18	2.5856e-07	0.00791587	1	1	1	1	1	1	1	1
GO:0000096	sulfur amino acid metabolic process	biological_process	1	1	1	1	1	1	1	1	1	1	1	1	1	1	1	1	1	1	1	1	1	1	1	1	1	1	1	1	1	1	1	1	1	1	1	1	1	1	1	1	1	1	1	1	1	1	1
GO:0000097	sulfur amino acid biosynthetic process	biological_process	1	1	1	1	1	1	1	1	1	1	1	1	1	1	1	1	1	1	1	1	1	1	1	1	1	1	1	1	1	1	1	1	1	1	1	1	1	1	1	1	1	1	1	1	1	1	1
GO:0000118	histone deacetylase complex	cellular_component	1	1	1	1	1	1	1	1	1	1	1	1	1	1	1	1	1	1	1	1	1	1	1	1	1	1	1	1	1	1	1	1	1	1	1	1	1	1	1	1	1	1	1	1	1	1	1
GO:0000122	negative regulation of transcription from RNA polymerase II promoter	biological_process	1	1	1	1	1	1	1	1	1	1	1	1	1	1	1	1	1	1	1	1	1	1	1	1	1	1	1	1	1	1	1	1	1	1	1	0.00350458	1	1	1	1	1	1	1	1	1	1	1
GO:0000123	histone acetyltransferase complex	cellular_component	1	1	1	1	1	1	1	1	1	1	1	1	1	1	1	1	1	1	1	1	1	1	1	1	1	1	1	1	1	1	1	1	1	1	1	1	0.00607542	0.0057943	1	1	1	1	1	1	1	1	1
GO:0000132	establishment of mitotic spindle orientation	biological_process	1	1	1	1	1	1	1	1	1	1	1	1	1	1	1	1	1	1	1	1	1	1	1	1	1	1	1	1	1	1	1	1	1	1	1	1	1	1	1	1	1	1	1	1	1	1	1
GO:0000139	Golgi membrane	cellular_component	1	1	1	1	1	1	1	1	1	1	1	1	1	1	1	1	1	1	1	1	1	1	1	1	1	1	1	1	1	1	1	1	1	1	1	1	1	1	1	1	1	1	1	1	1	1	1
GO:0000151	ubiquitin ligase complex	cellular_component	1	1	1	1	1	1	1	1	1	1	1	1	1	1	1	1	1	1	1	1	1	1	1	1	1	1	1	1	1	1	1	1	1	1	1	1	1	1	1	1	1	1	1	1	1	1	1
GO:0000152	nuclear ubiquitin ligase complex	cellular_component	1	1	1	1	1	1	1	1	1	1	1	1	1	1	1	1	1	1	1	1	1	1	1	1	1	1	1	1	1	1	1	1	1	1	1	1	0.00607542	1	1	1	1	1	1	1	1	1	1
GO:0000154	rRNA modification	biological_process	1	1	1	1	1	1	1	1	1	1	1	1	1	1	1	1	1	1	1	1	1	1	1	1	1	1	1	1	1	1	1	1	1	1	1	1	1	1	1	1	1	1	1	1	1	1	1
GO:0000159	protein phosphatase type 2A complex	cellular_component	1	1	1	1	1	1	1	1	1	1	1	1	1	1	1	1	1	1	1	1	1	1	1	1	1	1	1	1	1	1	1	1	1	1	1	1	1	1	1	1	1	1	1	1	1	1	1
GO:0000165	MAPK cascade	biological_process	1	1	1	1	1	1	1	1	1	1	1	1	1	1	1	1	1	1	1	1	1	1	1	1	1	1	1	1	1	1	1	1	1	1	1	1	1	1	1	1	1	1	1	1	1	1	1
GO:0000166	nucleotide binding	molecular_function	2.1184e-08	1.7888e-14	2.0192e-10	1	1	0.00016064	1	1	1	1	1	1	1	1	1	1	1	1	1	1	1	1	1	1	1	1	1	1	1	1	1	1	2.5888e-13	1	1	1	1	1	2.7488e-09	1	1	1	1	1	1	1	1
GO:0000175	3'-5'-exoribonuclease activity	molecular_function	1	1	1	1	1	1	1	1	1	1	1	1	1	1	1	1	1	1	1	1	1	1	1	1	1	1	1	1	1	1	1	1	1	1	1	1	1	1	1	1	1	1	1	1	1	1	1
GO:0000184	nuclear-transcribed mRNA catabolic process	nonsense-mediated decay	biological_process	1	1	1	1	1	1	1	1	1	1	1	1	1	1	1	1	1	1	1	1	1	1	1	1	1	1	1	1	1	1	1	1	1	1	1	1	1	1	1	1	1	1	1	1	1	1
GO:0000212	meiotic spindle organization	biological_process	1	1	1	1	1	1	1	1	1	1	1	1	1	1	1	1	1	1	1	1	1	1	1	1	1	1	1	1	1	1	1	1	1	1	1	1	1	1	1	1	1	1	1	1	1	1	1
GO:0000226	microtubule cytoskeleton organization	biological_process	1	3.056e-07	4.384e-06	1	1	1	0.0003808	1	1	1	1	1	1	1	1	1	1	1	1	1	1	1	1	1	1	1	1	1	1	1	1	1	0.0022176	1	1	1.8432e-18	1.152e-16	5.12e-07	1	1	1	1	1	1	1	1	1
GO:0000228	nuclear chromosome	cellular_component	1	1.9232e-05	0.00019904	1	1	1	1	1	1	1	1	1	1	1	1	1	1	1	1	1	1	1	1	1	1	1	1	1	1	1	1	1	1	1	1	1	0.0009216	1	1	1	1	1	1	1	1	1	1
GO:0000267	obsolete cell fraction	cellular_component	1	1	1	1	1	1	1	1	1	1	1	1	1	1	1	1	1	1	1	1	1	1	1	1	1	1	1	1	1	1	1	1	1	1	1	1	1	1	1	1	1	1	1	1	1	1	1
GO:0000270	peptidoglycan metabolic process	biological_process	1	1	1	1	1	1	1	1	1	1	1	1	1	1	1	1	1	1	1	1	1	1	1	1	1	1	1	1	1	1	1	1	1	1	1	1	1	1	1	1	1	1	1	1	1	1	1
GO:0000271	polysaccharide biosynthetic process	biological_process	1	1	1	1	1	1	1	1	1	1	1	1	1	1	1	1	1	1	1	1	1	1	1	1	1	1	1	1	1	1	1	1	1	1	1	1	1	1	1	1	1	1	1	1	1	1	1
GO:0000272	polysaccharide catabolic process	biological_process	1	1	1	1	1	1	1	1	1	1	1	1	1	1	1	1	1	1	1	1	1	1	1	1	1	1	1	1	1	1	1	1	1	1	1	1	1	1	1	1	1	1	1	1	1	1	1
GO:0000276	mitochondrial proton-transporting ATP synthase complex	coupling factor F(o)	cellular_component	1	1	1	1	1	1	1	1	1	1	1	1	1	1	1	1	1	1	1	1	1	1	1	1	1	1	1	1	1	1	1	1	1	1	1	1	1	1	1	1	1	1	1	1	1	1
GO:0000278	mitotic cell cycle	biological_process	1	9.312e-06	1.5616e-07	1	1	5.536e-05	3.0624e-12	1	2.256e-05	1	1	1	1	1	1	1	1	1	1	1	1	1	1	1	1	1	1	1	1	1	1	1	0.00056	1	1	8.832e-27	1.776e-24	1.008e-09	0.00064	1	1	1	1	1	1	1	1
GO:0000279	M phase	biological_process	6.368e-09	5.216e-17	2.2528e-14	0.0030048	1	1.4016e-06	1.0944e-08	1	0.0001104	1	1	1	1	1	1	1	1	1	1	1	1	1	1	1	1	1	1	1	1	1	1	1	1.0432e-10	0.0003648	1	6.944e-27	1.1072e-28	6.048e-12	0.00739126	1	1	1	1	1	1	1	1
GO:0000280	nuclear division	biological_process	1	1	0.00475894	1	1	6.08e-06	5.248e-07	1	1	1	1	1	1	1	1	1	1	1	1	1	1	1	1	1	1	1	1	1	1	1	1	1	1	1	1	1.9936e-11	9.472e-19	1.424e-07	0.00502435	1	1	1	1	1	1	1	1
GO:0000281	mitotic cytokinesis	biological_process	1	1	1	1	1	1	1	1	1	1	1	1	1	1	1	1	1	1	1	1	1	1	1	1	1	1	1	1	1	1	1	1	1	1	1	1	1	1	1	1	1	1	1	1	1	1	1
GO:0000287	magnesium ion binding	molecular_function	0.00795766	0.00387869	1	1	1	1	1	1	1	1	1	1	1	1	1	1	1	1	1	1	1	1	1	1	1	1	1	1	1	1	1	1	0.00176	1	1	1	1	1	1	1	1	1	1	1	1	1	1
GO:0000302	response to reactive oxygen species	biological_process	1	1	1	1	1	1	1	1	1	1	1	1	1	1	1	1	1	1	1	1	1	1	1	1	1	1	1	1	1	1	1	1	1	1	1	1	1	1	1	1	1	1	1	1	1	1	1
GO:0000313	organellar ribosome	cellular_component	1	1	1	1	1	1	1	1	1	1	1	1	1	1	1	1	1	1	1	1	1	1	1	1	1	1	1	1	1	1	1	1	1	1	1	1	1	1	1	1	1	1	1	1	1	1	1
GO:0000323	lytic vacuole	cellular_component	1	1	1	1	1	1	1	1	1	1	1	1	1	1	1	1	1	1	1	1	1	1	1	1	1	1	1	1	1	1	1	1	1	1	1	1	1	1	1	1	1	1	1	1	1	1	1
GO:0000375	RNA splicing	via transesterification reactions	biological_process	1	1	1	1	1	1	1	1	1	1	1	1	1	1	1	1	1	1	1	1	1	1	1	1	1	1	1	1	1	1	1	1	1	1	1	1	1	1	1	1	1	1	1	1	1	1
GO:0000377	RNA splicing	via transesterification reactions with bulged adenosine as nucleophile	biological_process	1	1	1	1	1	1	1	1	1	1	1	1	1	1	1	1	1	1	1	1	1	1	1	1	1	1	1	1	1	1	1	1	1	1	1	1	1	1	1	1	1	1	1	1	1	1
GO:0000398	mRNA splicing	via spliceosome	biological_process	1	1	1	1	1	1	1	1	1	1	1	1	1	1	1	1	1	1	1	1	1	1	1	1	1	1	1	1	1	1	1	1	1	1	1	1	1	1	1	1	1	1	1	1	1	1
GO:0000502	proteasome complex	cellular_component	8.032e-10	3.456e-15	2.6656e-19	1	1	1	1	1	1	1	1	1	1	1	1	1	1	1	1	1	1	1	1	1	1	1	1	1	1	1	1	1	6.752e-05	5.312e-09	1	1	1	1	1	1	1	1	1	1	1	1	1
GO:0000578	embryonic axis specification	biological_process	1	1	1	1	1	1	1	1	1	1	1	1	1	1	1	1	1	1	1	1	1	1	1	1	1	1	1	1	1	1	1	1	1	1	1	1	1	1	1	1	1	1	1	1	1	1	1
GO:0000723	telomere maintenance	biological_process	1	1	1	1	1	1	1	1	1	1	1	1	1	1	1	1	1	1	1	1	1	1	1	1	1	1	1	1	1	1	1	1	1	1	1	1	1	1	1	1	1	1	1	1	1	1	1
GO:0000737	DNA catabolic process	endonucleolytic	biological_process	1	1	1	1	1	1	1	1	1	1	1	1	1	1	1	1	1	1	1	1	1	1	1	1	1	1	1	1	1	1	1	1	1	1	1	1	1	1	1	1	1	1	1	1	1	1
GO:0000768	syncytium formation by plasma membrane fusion	biological_process	1	1	1	1	1	1	1	1	1	1	1	1	1	1	1	1	1	1	1	1	1	1	1	1	1	1	1	1	1	1	1	1	1	1	1	1	1	1	1	1	1	1	1	1	1	1	1
GO:0000775	chromosome	centromeric region	cellular_component	1	1	1	1	1	1.8432e-07	5.376e-05	1	1	1	1	1	1	1	1	1	1	1	1	1	1	1	1	1	1	1	1	1	1	1	1	1	1	1	1	4.544e-14	1.4752e-17	1.3568e-06	1	1	1	1	1	1	1	1
GO:0000776	kinetochore	cellular_component	1	1	1	1	1	0.0017344	7.616e-05	1	1	1	1	1	1	1	1	1	1	1	1	1	1	1	1	1	1	1	1	1	1	1	1	1	1	1	1	1.2704e-10	1.1904e-09	0.0009152	1	1	1	1	1	1	1	1	1
GO:0000779	condensed chromosome	centromeric region	cellular_component	1	1	1	1	1	0.0007072	1	1	1	1	1	1	1	1	1	1	1	1	1	1	1	1	1	1	1	1	1	1	1	1	1	1	1	1	1	2.0768e-06	1.3824e-12	7.584e-08	1	1	1	1	1	1	1	1
GO:0000785	chromatin	cellular_component	1	1	1	1	1	1	2.208e-15	7.68e-17	1	1.7504e-18	1	1	1	1	1	1	1	2.3936e-15	7.264e-06	0.0017024	1	1	1	1	1	1	1	1	1	1	1	6.016e-08	1	1	1	1.1552e-13	6.56e-52	3.648e-57	1	1.8592e-19	2.0576e-25	1	1	1	1	1	1
GO:0000786	nucleosome	cellular_component	1	1	1	1	1	1	1.4016e-15	7.712e-18	1	9.44e-19	1	1	1	1	1	1	1	1.056e-12	5.792e-07	0.0013728	1	1	1	1	1	1	1	1	1	1	1	1.7984e-06	1	1	1	1.1744e-13	2.3616e-58	1.7792e-62	1	1.0432e-30	2.5728e-32	1	1	1	1	1	1
GO:0000790	nuclear chromatin	cellular_component	1	1	1	1	1	1	1	1	1	1	1	1	1	1	1	1	1	1	1	1	1	1	1	1	1	1	1	1	1	1	1	1	1	1	1	1	1	1	1	1	1	1	1	1	1	1	1
GO:0000793	condensed chromosome	cellular_component	1	1	1	1	1	1	1	1	1	1	1	1	1	1	1	1	1	1	1	1	1	1	1	1	1	1	1	1	1	1	1	1	1	1	1	4.352e-05	1.6032e-12	1.424e-08	1	1	1	1	1	1	1	1	1
GO:0000794	condensed nuclear chromosome	cellular_component	1	0.0001728	1	1	1	1	1	1	1	1	1	1	1	1	1	1	1	1	1	1	1	1	1	1	1	1	1	1	1	1	1	1	1	1	1	1	0.00541088	1	1	1	1	1	1	1	1	1	1
GO:0000795	synaptonemal complex	cellular_component	1	0.0014688	1	1	1	1	1	1	1	1	1	1	1	1	1	1	1	1	1	1	1	1	1	1	1	1	1	1	1	1	1	1	1	1	1	1	1	1	1	1	1	1	1	1	1	1	1
GO:0000803	sex chromosome	cellular_component	1	1	1	1	1	1	1	1	1	1	1	1	1	1	1	1	1	1	1	1	1	1	1	1	1	1	1	1	1	1	1	1	1	1	1	1	1	1	1	1	1	1	1	1	1	1	1
GO:0000805	X chromosome	cellular_component	1	1	1	1	1	1	1	1	1	1	1	1	1	1	1	1	1	1	1	1	1	1	1	1	1	1	1	1	1	1	1	1	1	1	1	1	1	1	1	1	1	1	1	1	1	1	1
GO:0000819	sister chromatid segregation	biological_process	1	1	1	1	1	5.536e-07	1	1	1	1	1	1	1	1	1	1	1	1	1	1	1	1	1	1	1	1	1	1	1	1	1	1	1	1	1	9.536e-08	3.12e-10	1	1	1	1	1	1	1	1	1	1
GO:0000902	cell morphogenesis	biological_process	1	1	1	1	1	1	1	1	1	1	1	1	1	1	6.72e-06	1	1	1	1	1	1	0.0015072	1	0.00499549	0.00730614	1	0.00832976	1	1	1	1	1	1	1	1	1	1	1	4.32e-13	0.0005376	1	1.1968e-07	0.00015264	7.296e-08	0.00640752	1	1
GO:0000904	cell morphogenesis involved in differentiation	biological_process	1	1	1	1	1	1	1	1	1	1	1	1	1	1	0.0003328	1	1	1	1	1	1	0.0005472	1	1	1	1	1	1	1	1	1	1	1	1	1	1	1	1	6.432e-11	0.00400227	1	1.3568e-08	0.00881178	1	1	1	1
GO:0000910	cytokinesis	biological_process	6.272e-11	5.184e-11	2.4992e-07	1	1	6.272e-07	3.872e-07	1	0.00327197	1	1	1	1	1	1	1	1	1	1	1	1	1	1	1	1	1	1	1	1	1	1	1	7.616e-10	1	1	2.3296e-21	1.1168e-27	1.424e-09	1	1	1	1	1	1	1	1	1
GO:0000920	cell separation after cytokinesis	biological_process	1	1	1	1	1	1	1	1	1	1	1	1	1	1	1	1	1	1	1	1	1	1	1	1	1	1	1	1	1	1	1	1	1	1	1	1	0.003088	1	1	1	1	1	1	1	1	1	1
GO:0000922	spindle pole	cellular_component	1	1	1	1	1	1	1	1	1	1	1	1	1	1	1	1	1	1	1	1	1	1	1	1	1	1	1	1	1	1	1	1	1	1	1	1	0.00574976	1	1	1	1	1	1	1	1	1	1
GO:0000932	cytoplasmic mRNA processing body	cellular_component	1	1	1	1	1	1	1	1	1	1	1	1	1	1	1	1	1	1	1	1	1	1	1	1	1	1	1	1	1	1	1	1	1	1	1	1	1	1	1	1	1	1	1	1	1	1	1
GO:0000956	nuclear-transcribed mRNA catabolic process	biological_process	1	1	1	1	1	1	1	1	1	1	1	1	1	1	1	1	1	1	1	1	1	1	1	1	1	1	1	1	1	1	1	1	1	1	1	1	1	1	1	1	1	1	1	1	1	1	1
GO:0000981	RNA polymerase II transcription factor activity	sequence-specific DNA binding	molecular_function	1	1	1	1	1	1	1	1	1	1	1	1	1	1	1	1	1	1	0.0011968	1	1	1	1	1	1	1	1	1	1	1	1	1	1	1	1	1	1	1	1	1	1	1	1	1	1	1
GO:0000988	transcription factor activity	protein binding	molecular_function	1	1	1	1	1	1	1	1	1	1	1	1	1	1	1	1	1	1	1	1	1	1	1	1	1	1	1	1	1	1	1	1	1	1	1	1	1	1	1	1	1	1	1	1	1	1
GO:0000989	transcription factor activity	transcription factor binding	molecular_function	1	1	1	1	1	1	1	1	1	1	1	1	1	1	1	1	1	1	1	1	1	1	1	1	1	1	1	1	1	1	1	1	1	1	1	1	1	1	1	1	1	1	1	1	1	1
GO:0001071	nucleic acid binding transcription factor activity	molecular_function	1	1	1	1	1	1	1	0.00675034	1	1	1	1	1	1	1	1	0.000416	0.0002592	0.0006336	1	8.32e-10	1	1	0.00020672	0.0012128	1	1	1	1	1	1	5.632e-05	1	1	1	1	1	1	1	1	2.4608e-06	4.928e-11	0.0005376	1	1	1	1
GO:0001505	regulation of neurotransmitter levels	biological_process	1	1	1	1	1	1	1	1	1	1	1	1	1	1	1	1	1	1	1	1	1	1	1	1	1	1	0.001392	0.002448	1	1	1	1	1	1	1	1	1	1	1	1	1	1	1	1	1	1	1
GO:0001508	action potential	biological_process	1	1	1	1	1	1	1	1	1	1	1	1	1	1	1	1	1	1	1	1	1	1	1	1	1	1	1	1	1	1	1	1	1	1	1	1	1	1	1	1	1	1	1	1	1	1	1
GO:0001510	RNA methylation	biological_process	1	1	1	1	1	1	1	1	1	1	1	1	1	1	1	1	1	1	1	1	1	1	1	1	1	1	1	1	1	1	1	1	1	1	1	1	1	1	1	1	1	1	1	1	1	1	1
GO:0001522	pseudouridine synthesis	biological_process	1	1	1	1	1	1	1	1	1	1	1	1	1	1	1	1	1	1	1	1	1	1	1	1	1	1	1	1	1	1	1	1	1	1	1	1	1	1	1	1	1	1	1	1	1	1	1
GO:0001556	oocyte maturation	biological_process	1	1	1	1	1	1	1	1	1	1	1	1	1	1	1	1	1	1	1	1	1	1	1	1	1	1	1	1	1	1	1	1	1	1	1	1	0.0019968	1	1	1	1	1	1	1	1	1	1
GO:0001558	regulation of cell growth	biological_process	1	1	1	1	1	1	1	1	1	1	1	1	1	1	0.0014592	1	1	1	1	1	1	1	1	1	1	1	1	1	1	1	1	1	1	1	1	1	1	1	1	1	1	1	1	1	1	1	1
GO:0001653	peptide receptor activity	molecular_function	1	1	1	1	1	1	1	1	1	1	1	1	1	1	1	1	1	1	1	1	1	1	1	1	1	1	1	0.00583488	5.568e-07	6.976e-07	1	1	1	1	1	1	1	1	1	1	1	1	1	1	1	1	1
GO:0001664	G-protein coupled receptor binding	molecular_function	1	1	1	1	1	1	1	1	1	1	1	1	1	1	1	1	1	1	1	1	1	1	1	1	1	1	1	1	1	1	1	1	1	1	1	1	1	1	1	1	1	1	1	1	1	1	1
GO:0001667	ameboidal-type cell migration	biological_process	1	1	1	1	1	1	1	1	1	1	1	1	1	1	1	1	1	1	2.4416e-05	1	1	1	1	1	1	1	1	1	1	1	1	1	1	1	1	1	1	1	1	4.224e-05	1	4.576e-05	1	1	1	1	1
GO:0001703	gastrulation with mouth forming first	biological_process	1	1	1	0.0004608	1	1	0.0003776	1	1	1	1	1	1	1	1	1	1	1	1	1	1	1	1	1	1	1	1	1	1	1	1	1	1	1	1	1	0.001504	1	1	1	1	1	1	1	1	1	1
GO:0001704	formation of primary germ layer	biological_process	1	1	1	1	1	1	1	1	1	1	1	1	1	1	1	1	1	0.0006016	0.0098097	1	1	1	1	1	1	1	1	1	1	1	1	1	1	1	1	1	1	1	1	0.00128	1	0.0004448	1	1	1	1	1
GO:0001706	endoderm formation	biological_process	1	1	1	1	1	1	1	1	1	1	1	1	1	1	1	1	1	1	1	1	1	1	1	1	1	1	1	1	1	1	1	1	1	1	1	0.00923558	1	1	1	1	1	1	1	1	1	1	1
GO:0001707	mesoderm formation	biological_process	1	1	1	1	1	1	1	1	1	1	1	1	1	1	1	1	1	1	0.00012224	1	1	1	1	1	1	1	1	1	1	1	1	1	1	1	1	1	1	1	1	0.00777194	1	3.904e-07	1	1	1	1	1
GO:0001708	cell fate specification	biological_process	1	1	1	1	1	1	1	1	1	1	1	1	1	1	1	1	1	2.2368e-09	0.0022528	1	1	1	1	1	1	1	1	1	1	1	1	8.736e-07	1	1	1	7.2e-06	0.00524317	1	1	1	0.00017728	7.424e-05	1	1	1	1	1
GO:0001709	cell fate determination	biological_process	1	1	1	1	1	1	1	1	1	1	1	1	1	1	1	1	1	1	1	1	1	1	1	1	1	1	1	1	1	1	1	1	0.00136	1	1	1	1	1	1	1	1	1	1	1	1	1	1
GO:0001710	mesodermal cell fate commitment	biological_process	1	1	1	1	1	1	1	1	1	1	1	1	1	1	1	1	1	1	1	1	1	1	1	1	1	1	1	1	1	1	1	1	1	1	1	1	1	1	1	1	1	1	1	1	1	1	1
GO:0001711	endodermal cell fate commitment	biological_process	1	1	1	1	1	1	1	1	1	1	1	1	1	1	1	1	1	1	1	1	1	1	1	1	1	1	1	1	1	1	1	1	1	1	1	0.00923558	1	1	1	1	1	1	1	1	1	1	1
GO:0001714	endodermal cell fate specification	biological_process	1	1	1	1	1	1	1	1	1	1	1	1	1	1	1	1	1	1	1	1	1	1	1	1	1	1	1	1	1	1	1	1	1	1	1	1	1	1	1	1	1	1	1	1	1	1	1
GO:0001727	lipid kinase activity	molecular_function	1	1	1	1	1	1	1	1	1	1	1	1	1	1	1	1	1	1	1	1	1	1	1	1	1	1	1	1	1	1	1	1	1	1	1	1	1	1	1	1	1	1	1	1	1	1	1
GO:0001764	neuron migration	biological_process	1	1	1	1	1	1	1	1	1	1	1	1	1	1	1	1	1	0.0007392	1.168e-06	0.0031776	1	0.00232	1	1	1	1	1	1	1	1	1	1	1	1	1	1	1	1	0.0001456	1	0.00331133	2.9952e-06	1	1	1	1	1
GO:0001871	pattern binding	molecular_function	1	1	1	1	1	1	1	1	1	1	1	1	1	1	1	1	1	1	1	1	1	1	1	1	1	1	1	1	1	1	1	1	1	1	1	1	1	1	1	2.416e-05	1	1	1	1	1	1	0.00941014
GO:0001882	nucleoside binding	molecular_function	8.224e-07	4.832e-10	0.00018976	1	1	0.0016864	1	1	1	1	1	1	1	1	1	1	1	1	1	1	1	1	1	1	1	1	1	1	1	1	1	1	1.1072e-13	1	1	1	1	1	6.4e-10	1	1	1	1	1	1	1	1
GO:0001883	purine nucleoside binding	molecular_function	6.816e-07	3.616e-10	0.00016288	1	1	0.001568	1	1	1	1	1	1	1	1	1	1	1	1	1	1	1	1	1	1	1	1	1	1	1	1	1	1	8.576e-14	1	1	1	1	1	5.408e-10	1	1	1	1	1	1	1	1
GO:0001932	regulation of protein phosphorylation	biological_process	1	1	1	1	1	1	1	1	1	1	1	1	1	1	1	1	1	1	1	1	1	1	1	1	1	1	1	1	1	1	1	1	1	1	1	1	1	1	1	1	1	1	1	1	1	1	1
GO:0002009	morphogenesis of an epithelium	biological_process	2.368e-05	3.616e-08	0.00011808	1	1	0.0013792	6.88e-06	1	1	1	1	1	1	1	1	1	1	0.0009792	0.00939782	1	1	1	1	1	1	1	1	1	1	1	1	1	4.032e-06	1	1	9.888e-11	7.008e-08	4.96e-05	5.216e-10	1	1	0.0029728	1	1	1	1	1
GO:0002064	epithelial cell development	biological_process	1	1	1	1	1	1	1	1	1	1	1	1	1	1	1	1	1	1	1	1	1	1	1	1	1	1	1	1	1	1	1	1	1	1	1	1	1	1	0.00418739	1	1	1	1	0.00403814	1	1	1
GO:0002097	tRNA wobble base modification	biological_process	1	1	1	1	1	1	1	1	1	1	1	1	1	1	1	1	1	1	1	1	1	1	1	1	1	1	1	1	1	1	1	1	1	1	1	1	1	1	1	1	1	1	1	1	1	1	1
GO:0002098	tRNA wobble uridine modification	biological_process	1	1	1	1	1	1	1	1	1	1	1	1	1	1	1	1	1	1	1	1	1	1	1	1	1	1	1	1	1	1	1	1	1	1	1	1	1	1	1	1	1	1	1	1	1	1	1
GO:0002119	nematode larval development	biological_process	1.5808e-10	3.1776e-27	3.84e-20	1	1	1	2.304e-13	0.00011424	0.00793728	1.6992e-07	1	1	1	0.0009696	1	1	1	4.896e-11	6.688e-12	0.00256	1	1	1	0.00396173	1	1	1	1	1	1	1	3.808e-07	8.896e-10	1	0.00778336	3.488e-16	3.12e-18	5.952e-12	1.0368e-17	1	3.776e-08	2.288e-10	1	1	1	1	1
GO:0002164	larval development	biological_process	1.6736e-10	3.584e-27	4.16e-20	1	1	1	2.3808e-13	0.00011552	0.00800624	1.728e-07	1	1	1	0.0009792	1	1	1	5.088e-11	6.912e-12	0.0025888	1	1	1	0.00401888	1	1	1	1	1	1	1	3.936e-07	9.344e-10	1	0.00795469	3.648e-16	3.232e-18	6.112e-12	1.0944e-17	1	3.968e-08	2.3744e-10	1	1	1	1	1
GO:0002376	immune system process	biological_process	1	1	1	1	1	1	1	1	1	1	1	1	1	1	1	1	1	1	1	1	1	1	1	1	1	1	1	1	1	1	1	1	1	1	1	1	1	1	1	1	1	1	1	1	1	1	1
GO:0002682	regulation of immune system process	biological_process	1	1	1	1	1	1	1	1	1	1	1	1	1	1	1	1	1	1	1	1	1	1	1	1	1	1	1	1	1	1	1	1	1	1	1	1	1	1	1	1	1	1	1	1	1	1	1
GO:0003001	obsolete generation of a signal involved in cell-cell signaling	biological_process	1	1	1	1	1	1	1	1	1	1	1	1	1	1	1	1	1	1	1	1	1	1	1	1	1	1	1	1	1	1	1	1	1	1	1	1	1	1	1	1	1	1	1	1	1	1	1
GO:0003002	regionalization	biological_process	1	1	1	1	1	1	1	1	1	1	1	1	1	1	1	1	1	1	1	1	1	1	1	1	1	1	1	1	1	1	1	1	1	1	1	1	1	1	1	1	1	1	1	1	1	1	1
GO:0003006	developmental process involved in reproduction	biological_process	0.00014528	1.9936e-14	5.728e-18	0.000176	1	1.1328e-05	1.504e-14	0.0004736	1	1	1	1	1	1	1	1	0.00546042	0.0004576	1	1	1	1	1	1	1	1	1	1	1	1	1	1	1.6576e-06	0.00678291	0.00019072	1.9584e-30	2.3488e-25	3.0048e-16	5.6e-11	1	1	1	1	1	1	1	1
GO:0003008	system process	biological_process	1	1	1	1	1	1	1	1	1	1	1	1	1	1	1	1	1	1	1	1	1	1	1	1	1	1	1	0.0015936	1	1	0.0017344	1	1	1	1	1	1	1	1	1	1	1	0.00418826	1	1	1	1
GO:0003012	muscle system process	biological_process	1	1	1	1	1	1	1	1	1	1	1	1	1	1	1	1	1	1	1	1	1	1	1	1	1	1	1	0.00496413	1	1	1	1	1	1	1	1	1	1	1	1	1	1	3.296e-05	1.8976e-06	9.856e-06	1	1
GO:0003674	molecular_function	molecular_function	3.552e-15	3.1168e-26	3.712e-18	0.0015232	1	0.00443533	7.136e-07	1	0.00934176	0.0011328	0.0008896	1	1	0.0004128	2.8352e-08	1	9.12e-05	1.488e-06	1.4144e-07	1	6.624e-09	8.48e-08	0.00406874	5.856e-05	1	1	1	1	1	1	1	1.1392e-08	9.568e-20	1	0.0007808	4.16e-05	3.1296e-10	1.4016e-07	2.9824e-06	1	0.0015072	6.72e-10	1.0944e-11	5.632e-05	1	1	1
GO:0003676	nucleic acid binding	molecular_function	0.0005184	1.456e-07	2.0032e-09	9.344e-08	1	1	1.904e-07	7.168e-12	1	1.8336e-09	1	1	1	1	1	1	4.608e-06	3.424e-14	1.8016e-07	1	0.0005344	1	1	1	1	1	1	1	1	1	1	1.8016e-09	0.0005184	0.00464266	1.9936e-06	8.832e-17	4.416e-20	2.1568e-15	1	0.0006304	1.7344e-11	3.456e-05	1	1	1	1	1
GO:0003677	DNA binding	molecular_function	1	1	1	1	1	1	5.6e-06	1.6512e-13	1	8.672e-10	1	1	1	1	1	1	1	4.704e-14	2.2496e-08	1	2.0672e-06	1	1	1	1	1	1	1	1	1	1	4e-08	1	1	0.0017568	5.344e-17	1.8976e-29	1.3984e-24	1	2.0896e-07	5.568e-15	1.808e-05	1	1	1	1	1
GO:0003678	DNA helicase activity	molecular_function	1	1.2672e-05	1	1	1	1	1	1	1	1	1	1	1	1	1	1	1	1	1	1	1	1	1	1	1	1	1	1	1	1	1	1	1	1	1	0.00651299	1	1	1	1	1	1	1	1	1	1	1
GO:0003682	chromatin binding	molecular_function	1	1	1	1	1	1	1	1	1	1	1	1	1	1	1	1	1	1	1	1	1	1	1	1	1	1	1	1	1	1	1	1	1	1	1	1	1	1	1	1	1	1	1	1	1	1	1
GO:0003684	damaged DNA binding	molecular_function	1	2.0352e-05	0.00639277	1	1	1	1	1	1	1	1	1	1	1	1	1	1	1	1	1	1	1	1	1	1	1	1	1	1	1	1	1	1	1	1	1	1	1	1	1	1	1	1	1	1	1	1
GO:0003690	double-stranded DNA binding	molecular_function	1	1	1	1	1	1	1	1	1	1	1	1	1	1	1	1	1	1	1	1	1	1	1	1	1	1	1	1	1	1	1	1	1	1	1	1	1	1	1	1	1	1	1	1	1	1	1
GO:0003697	single-stranded DNA binding	molecular_function	1	1	1	1	1	1	1	1	1	1	1	1	1	1	1	1	1	1	1	1	1	1	1	1	1	1	1	1	1	1	1	1	1	1	1	1	1	1	1	1	1	1	1	1	1	1	1
GO:0003700	transcription factor activity	sequence-specific DNA binding	molecular_function	1	1	1	1	1	1	1	0.00675034	1	1	1	1	1	1	1	1	0.000416	0.0002592	0.0006336	1	8.32e-10	1	1	0.00020672	0.0012128	1	1	1	1	1	1	5.632e-05	1	1	1	1	1	1	1	1	2.4608e-06	4.928e-11	0.0005376	1	1	1
GO:0003702	obsolete RNA polymerase II transcription factor activity	molecular_function	1	0.000656	1	1	1	1	1	1	1	1	1	1	1	1	1	1	1	1	1	1	1	1	1	1	1	1	1	1	1	1	1	1	1	1	1	1	1	1	1	1	1	1	1	1	1	1	1
GO:0003704	obsolete specific RNA polymerase II transcription factor activity	molecular_function	1	1	1	1	1	1	1	1	1	1	1	1	1	1	1	1	1	1	1	1	1	1	1	1	1	1	1	1	1	1	1	1	1	1	1	1	1	1	1	1	0.0004256	1	1	1	1	1	1
GO:0003705	transcription factor activity	RNA polymerase II distal enhancer sequence-specific binding	molecular_function	1	1	1	1	1	1	1	1	1	1	1	1	1	1	1	1	1	1	0.0011968	1	1	1	1	1	1	1	1	1	1	1	1	1	1	1	1	1	1	1	1	1	1	1	1	1	1	1
GO:0003707	steroid hormone receptor activity	molecular_function	1	1	1	1	1	1	1	1	1	1	1	1	1	1	1	1	1	1	1	1	1	1	1	1	1	1	1	1	1	1	1	1	1	1	1	1	1	1	1	1	1	1	1	1	1	1	1
GO:0003712	transcription cofactor activity	molecular_function	1	1	1	1	1	1	1	1	1	1	1	1	1	1	1	1	1	1	1	1	1	1	1	1	1	1	1	1	1	1	1	1	1	1	1	1	1	1	1	1	1	1	1	1	1	1	1
GO:0003713	transcription coactivator activity	molecular_function	1	1	1	1	1	1	1	1	1	1	1	1	1	1	1	1	1	1	1	1	1	1	1	1	1	1	1	1	1	1	1	1	1	1	1	0.00366208	1	1	1	1	1	1	1	1	1	1	1
GO:0003714	transcription corepressor activity	molecular_function	1	1	1	1	1	1	1	1	1	1	1	1	1	1	1	1	1	1	1	1	1	1	1	1	1	1	1	1	1	1	1	1	1	1	1	1	1	1	1	1	1	1	1	1	1	1	1
GO:0003723	RNA binding	molecular_function	2.9152e-09	3.296e-13	8.608e-07	1	1	1	1	1	1	1	1	1	1	1	1	1	1	1	1	1	1	1	1	1	1	1	1	1	1	1	1	1	1.9936e-08	1.2192e-05	1	1	1	1	1	1	1	1	1	1	1	1	1
GO:0003724	RNA helicase activity	molecular_function	1	1	1	1	1	1	1	1	1	1	1	1	1	1	1	1	1	1	1	1	1	1	1	1	1	1	1	1	1	1	1	1	1	1	1	1	1	1	1	1	1	1	1	1	1	1	1
GO:0003725	double-stranded RNA binding	molecular_function	1	1	1	1	1	1	1	1	1	1	1	1	1	1	1	1	1	1	1	1	1	1	1	1	1	1	1	1	1	1	1	1	1	1	1	1	1	1	1	1	1	1	1	1	1	1	1
GO:0003727	single-stranded RNA binding	molecular_function	1	1	1	1	1	1	1	1	1	1	1	1	1	1	1	1	1	1	1	1	1	1	1	1	1	1	1	1	1	1	1	1	0.00671296	1	1	1	1	1	1	1	1	1	1	1	1	1	1
GO:0003729	mRNA binding	molecular_function	1.0976e-05	0.0005184	1	1	1	1	1	1	1	1	1	1	1	1	1	1	1	1	1	1	1	1	1	1	1	1	1	1	1	1	1	1	2.8032e-06	1	1	1	1	1	1	1	1	1	1	1	1	1	1
GO:0003730	mRNA 3'-UTR binding	molecular_function	3.84e-07	2.0928e-05	1	1	1	1	1	1	1	1	1	1	1	1	1	1	1	1	1	1	1	1	1	1	1	1	1	1	1	1	1	1	9.44e-08	0.00341264	1	1	1	1	1	1	1	1	1	1	1	1	1
GO:0003735	structural constituent of ribosome	molecular_function	1	1	1	1	1	1	1	1	1	1	1	1	1	1	1	1	1	1	1	1	1	1	1	1	1	1	1	1	1	1	1	1	1	1	1	1	1	1	1	1	5.536e-10	1	1	1	1	1	1
GO:0003743	translation initiation factor activity	molecular_function	1	0.00904397	1	1	1	1	1	1	1	1	1	1	1	1	1	1	1	1	1	1	1	1	1	1	1	1	1	1	1	1	1	1	1	1	1	1	1	1	1	1	1	1	1	1	1	1	1
GO:0003746	translation elongation factor activity	molecular_function	1	1	1	1	1	1	1	1	1	1	1	1	1	1	1	1	1	1	1	1	1	1	1	1	1	1	1	1	1	1	1	1	1	1	1	1	1	1	1	1	1	1	1	1	1	1	1
GO:0003755	peptidyl-prolyl cis-trans isomerase activity	molecular_function	1	1	1	1	1	1	1	1	1	1	1	1	1	1	1	1	1	1	1	1	1	1	1	1	1	1	1	1	1	1	1	1	1	1	1	1	1	1	1	1	1	1	1	1	1	1	1
GO:0003774	motor activity	molecular_function	1	1	1	1	1	1	1	1	1	1	1	1	1	1	0.00746077	1	1	1	1	1	1	1	1	1	1	1	1	0.0029184	1	1	1	1	1	1	1	1	1	1	0.0012288	1	1	1	1	1	0.001328	1	1
GO:0003777	microtubule motor activity	molecular_function	1	1	1	1	1	1	1	1	1	1	1	1	1	1	1	1	1	1	1	1	1	1	1	1	1	1	1	1	1	1	1	1	1	1	1	1	1	1	1	1	1	1	1	1	1	1	1
GO:0003779	actin binding	molecular_function	1	1	1	1	1	1	1	1	1	1	1	1	1	0.0020896	0.0002672	1	1	1	1	1	1	1	1	1	1	1	1	1	1	1	1	1	1	1	1	1	1	1	0.00026816	1	1	7.2e-06	1	0.0013504	1	1	1
GO:0003796	lysozyme activity	molecular_function	1	1	1	1	1	1	1	1	1	1	1	1	1	1	1	1	1	1	1	1	1	1	1	1	1	1	1	1	1	1	1	1	1	1	1	1	1	1	1	1	1	1	1	1	1	1	1
GO:0003824	catalytic activity	molecular_function	3.36e-09	1.52e-19	3.872e-14	1	1	4.832e-05	1	1	1	1	4.096e-06	1	1	1	1	1	1	1	1	1	0.0010336	1	1	1	1	1	1	1	1	1	1	1	2.7136e-12	1	1	1	1	1	0.0006208	1	1	1	1	1	1	1	1
GO:0003840	gamma-glutamyltransferase activity	molecular_function	1	1	1	1	1	1	1	1	1	1	1	1	1	1	1	1	1	1	1	1	1	1	1	1	1	1	1	1	1	1	1	1	1	1	1	1	1	1	1	1	1	1	1	1	1	1	1
GO:0003854	3-beta-hydroxy-delta5-steroid dehydrogenase activity	molecular_function	1	1	1	1	1	1	1	1	1	1	1	1	1	1	1	1	1	1	1	1	1	1	1	1	1	1	1	1	1	1	1	1	1	1	1	1	1	1	1	1	1	1	1	1	1	1	1
GO:0003887	DNA-directed DNA polymerase activity	molecular_function	1	1	1	1	1	1	1	1	1	1	1	1	1	1	1	1	1	1	1	1	1	1	1	1	1	1	1	1	1	1	1	1	1	1	1	1	1	1	1	1	1	1	1	1	1	1	1
GO:0003899	DNA-directed RNA polymerase activity	molecular_function	1	1	1	1	1	1	1	1	1	1	1	1	1	1	1	1	1	1	1	1	1	1	1	1	1	1	1	1	1	1	1	1	1	1	1	1	1	1	1	1	1	1	1	1	1	1	1
GO:0003909	DNA ligase activity	molecular_function	1	1	1	1	1	1	1	1	1	1	1	1	1	1	1	1	1	1	1	1	1	1	1	1	1	1	1	1	1	1	1	1	1	1	1	1	1	1	1	1	1	1	1	1	1	1	1
GO:0003910	DNA ligase (ATP) activity	molecular_function	1	1	1	1	1	1	1	1	1	1	1	1	1	1	1	1	1	1	1	1	1	1	1	1	1	1	1	1	1	1	1	1	1	1	1	1	1	1	1	1	1	1	1	1	1	1	1
GO:0003916	DNA topoisomerase activity	molecular_function	1	1	1	1	1	1	1	1	1	1	1	1	1	1	1	1	1	1	1	1	1	1	1	1	1	1	1	1	1	1	1	1	1	1	1	1	1	1	1	1	1	1	1	1	1	1	1
GO:0003918	DNA topoisomerase type II (ATP-hydrolyzing) activity	molecular_function	1	1	1	1	1	1	1	1	1	1	1	1	1	1	1	1	1	1	1	1	1	1	1	1	1	1	1	1	1	1	1	1	1	1	1	1	1	1	1	1	1	1	1	1	1	1	1
GO:0003924	GTPase activity	molecular_function	1	1	1	1	1	1	1	1	1	1	1	1	1	1	1	1	1	1	1	1	1	1	1	1	1	1	1	1	1	1	1	1	1	1	1	1	1	1	1	1	1	1	1	1	1	1	1
GO:0003954	NADH dehydrogenase activity	molecular_function	1	1	1	1	1	1	1	1	1	1	1	1	1	1	1	1	1	1	1	1	1	1	1	1	1	1	1	1	1	1	1	1	1	1	1	1	1	1	1	1	0.0044119	1	1	1	1	1	1
GO:0003993	acid phosphatase activity	molecular_function	1	1	1	1	1	1	1	1	1	1	1	1	1	1	1	1	1	1	1	1	1	1	1	1	1	1	1	1	1	1	1	1	1	1	1	1	1	1	1	1	1	1	1	1	1	1	1
GO:0003995	acyl-CoA dehydrogenase activity	molecular_function	1	1	1	1	1	1	1	1	1	1	1	1	1	1	1	1	1	1	1	1	1	1	1	1	1	1	1	1	1	1	1	1	1	1	1	1	1	1	1	1	1	1	1	1	1	1	1
GO:0003997	acyl-CoA oxidase activity	molecular_function	1	1	1	1	1	1	1	1	1	1	1	1	1	1	1	1	1	1	1	1	1	1	1	1	1	1	1	1	1	1	1	1	1	1	1	1	1	1	1	1	1	1	1	1	1	1	1
GO:0004003	ATP-dependent DNA helicase activity	molecular_function	1	0.00537981	1	1	1	1	1	1	1	1	1	1	1	1	1	1	1	1	1	1	1	1	1	1	1	1	1	1	1	1	1	1	1	1	1	1	1	1	1	1	1	1	1	1	1	1	1
GO:0004012	phospholipid-translocating ATPase activity	molecular_function	1	1	1	1	1	1	1	1	1	1	1	1	1	1	1	1	1	1	1	1	1	1	1	1	1	1	1	1	1	1	1	1	1	1	1	1	1	1	1	1	1	1	1	1	1	1	1
GO:0004022	alcohol dehydrogenase (NAD) activity	molecular_function	1	1	1	1	1	1	1	1	1	1	1	1	1	1	1	1	1	1	1	1	1	1	1	1	1	1	1	1	1	1	1	1	1	1	1	1	1	1	1	1	1	1	1	1	1	1	1
GO:0004064	arylesterase activity	molecular_function	1	1	1	1	1	1	1	1	1	1	1	1	1	1	1	1	1	1	1	1	1	1	1	1	1	1	1	1	1	1	1	1	1	1	1	1	1	1	1	1	1	1	1	1	1	1	1
GO:0004066	asparagine synthase (glutamine-hydrolyzing) activity	molecular_function	1	1	1	1	1	1	1	1	1	1	1	1	1	1	1	1	1	1	1	1	1	1	1	1	1	1	1	1	1	1	1	1	1	1	1	1	1	1	1	1	1	1	1	1	1	1	1
GO:0004089	carbonate dehydratase activity	molecular_function	1	1	1	1	1	1	1	1	1	1	1	1	1	1	1	1	1	1	1	1	1	1	1	1	1	1	1	1	1	1	1	1	1	1	1	1	1	1	1	1	1	1	1	1	1	1	1
GO:0004112	cyclic-nucleotide phosphodiesterase activity	molecular_function	1	1	1	1	1	1	1	1	1	1	1	1	1	1	1	1	1	1	1	1	1	1	1	1	1	1	1	1	1	1	1	1	1	1	1	1	1	1	1	1	1	1	1	1	1	1	1
GO:0004114	3'	5'-cyclic-nucleotide phosphodiesterase activity	molecular_function	1	1	1	1	1	1	1	1	1	1	1	1	1	1	1	1	1	1	1	1	1	1	1	1	1	1	1	1	1	1	1	1	1	1	1	1	1	1	1	1	1	1	1	1	1	1
GO:0004129	cytochrome-c oxidase activity	molecular_function	1	1	1	1	1	1	1	1	1	1	1	1	1	1	1	1	1	1	1	1	1	1	1	1	1	1	1	1	1	1	1	1	1	0.00341264	0.00336803	1	1	1	1	1	1	1	1	1	1	1	1
GO:0004143	diacylglycerol kinase activity	molecular_function	1	1	1	1	1	1	1	1	1	1	1	1	1	1	1	1	1	1	1	1	1	1	1	1	1	1	1	1	1	1	1	1	1	1	1	1	1	1	1	1	1	1	1	1	1	1	1
GO:0004175	endopeptidase activity	molecular_function	1	1	1	1	1	1	1	1	1	1	1	1	1	1	1	1	1	1	1	1	1	1	1	1	1	1	1	1	1	1	1	1	1	1	1	1	1	1	1	1	1	1	1	1	1	1	1
GO:0004176	ATP-dependent peptidase activity	molecular_function	1	1	1	1	1	1	1	1	1	1	1	1	1	1	1	1	1	1	1	1	1	1	1	1	1	1	1	1	1	1	1	1	1	1	1	1	1	1	1	1	1	1	1	1	1	1	1
GO:0004177	aminopeptidase activity	molecular_function	1	1	1	1	1	1	1	1	1	1	1	1	1	1	1	1	1	1	1	1	1	1	1	1	1	1	1	1	1	1	1	1	1	1	1	1	1	1	1	1	1	1	1	1	1	1	1
GO:0004180	carboxypeptidase activity	molecular_function	1	1	1	1	1	1	1	1	1	1	1	1	1	1	1	1	1	1	1	1	1	1	1	1	1	1	1	0.0062425	1	1	1	1	1	1	1	1	1	1	1	1	1	1	1	1	1	0.00017312	1
GO:0004181	metallocarboxypeptidase activity	molecular_function	1	1	1	1	1	1	1	1	1	1	1	1	1	1	1	1	1	1	1	1	1	1	1	1	1	1	1	1	1	1	1	1	1	1	1	1	1	1	1	1	1	1	1	1	1	1	1
GO:0004185	serine-type carboxypeptidase activity	molecular_function	1	1	1	1	1	1	1	1	1	1	1	1	1	1	1	1	1	1	1	1	1	1	1	1	1	1	1	1	1	1	1	1	1	1	1	1	1	1	1	1	1	1	1	1	1	1	1
GO:0004190	aspartic-type endopeptidase activity	molecular_function	1	1	1	1	1	1	1	1	1	1	1	1	1	1	1	1	1	1	1	1	1	1	1	1	1	1	1	1	1	1	1	1	1	1	1	1	1	1	1	1	1	1	1	1	1	1	1
GO:0004197	cysteine-type endopeptidase activity	molecular_function	1	1	1	1	1	1	1	1	1	1	1	1	1	1	1	1	1	1	1	1	0.0027488	1	1	1	1	1	1	1	1	1	1	1	1	1	1	1	1	1	1	1	1	0.0022144	1	1	1	1	1
GO:0004198	calcium-dependent cysteine-type endopeptidase activity	molecular_function	1	1	1	1	1	1	1	1	1	1	1	1	1	1	1	1	1	1	1	1	1	1	1	1	1	1	1	1	1	1	1	1	1	1	1	1	1	1	1	1	1	1	1	1	1	1	1
GO:0004221	obsolete ubiquitin thiolesterase activity	molecular_function	1	1	1	1	1	1	1	1	1	1	1	1	1	1	1	1	1	1	1	1	1	1	1	1	1	1	1	1	1	1	1	1	1	1	1	1	1	1	1	1	1	1	1	1	1	1	1
GO:0004222	metalloendopeptidase activity	molecular_function	1	1	1	1	1	1	1	1	1	1	1	1	1	1	1	1	1	1	1	1	1	1	1	1	1	1	1	1	1	1	1	1	1	1	1	1	1	1	1	1	1	1	1	1	1	1	1
GO:0004252	serine-type endopeptidase activity	molecular_function	1	1	1	1	1	1	1	1	1	1	1	1	1	1	1	1	1	1	1	1	1	1	1	1	1	1	1	1	1	1	1	1	1	1	1	1	1	1	1	1	1	1	1	1	1	1	1
GO:0004298	threonine-type endopeptidase activity	molecular_function	3.936e-10	2.2208e-11	4.032e-10	1	1	1	1	1	1	1	1	1	1	1	1	1	1	1	1	1	1	1	1	1	1	1	1	1	1	1	1	1	5.408e-05	2.272e-09	1	1	1	1	1	1	1	1	1	1	1	1	1
GO:0004348	glucosylceramidase activity	molecular_function	1	1	1	1	1	1	1	1	1	1	1	1	1	1	1	1	1	1	1	1	1	1	1	1	1	1	1	1	1	1	1	1	1	1	1	1	1	1	1	1	1	1	1	1	1	1	1
GO:0004356	glutamate-ammonia ligase activity	molecular_function	1	1	1	1	1	1	1	1	1	1	1	1	1	1	1	1	1	1	1	1	1	1	1	1	1	1	1	1	1	1	1	1	1	1	1	1	1	1	1	1	1	1	1	1	1	1	1
GO:0004364	glutathione transferase activity	molecular_function	1	1	1	1	1	1	1	1	1	1	1	1	1	1	1	1	1	1	1	1	1	1	1	1	1	1	1	1	1	1	1	1	1	1	1	1	1	1	1	1	1	1	1	1	1	1	1
GO:0004383	guanylate cyclase activity	molecular_function	1	1	1	1	1	1	1	1	1	1	1	1	1	1	1	1	1	1	1	1	1	1	1	1	1	1	0.0024384	6.208e-10	1	1	1	1	1	1	1	1	1	1	1	1	1	1	1	1	1	1	1
GO:0004386	helicase activity	molecular_function	1	0.00012544	6.56e-05	1	1	1	1	1	1	1	1	1	1	1	1	1	1	1	1	1	1	1	1	1	1	1	1	1	1	1	1	1	1	1	1	1	1	1	4.288e-07	1	1	1	1	1	1	1	1
GO:0004402	histone acetyltransferase activity	molecular_function	1	1	1	1	1	1	1	1	1	1	1	1	1	1	1	1	1	1	1	1	1	1	1	1	1	1	1	1	1	1	1	1	1	1	1	1	1	1	1	1	1	1	1	1	1	1	1
GO:0004407	histone deacetylase activity	molecular_function	1	1	1	1	1	1	1	1	1	1	1	1	1	1	1	1	1	1	1	1	1	1	1	1	1	1	1	1	1	1	1	1	1	1	1	1	1	1	1	1	1	1	1	1	1	1	1
GO:0004427	inorganic diphosphatase activity	molecular_function	1	1	1	1	1	1	1	1	1	1	1	1	1	1	1	1	1	1	1	1	1	1	1	1	1	1	1	1	1	1	1	1	1	1	1	1	1	1	1	1	1	1	1	1	1	1	1
GO:0004428	obsolete inositol or phosphatidylinositol kinase activity	molecular_function	1	1	1	1	1	1	1	1	1	1	1	1	1	1	1	1	1	1	1	1	1	1	1	1	1	1	1	1	1	1	1	1	1	1	1	1	1	1	1	1	1	1	1	1	1	1	1
GO:0004435	phosphatidylinositol phospholipase C activity	molecular_function	1	1	1	1	1	1	1	1	1	1	1	1	1	1	1	1	1	1	1	1	1	1	1	1	1	1	1	1	1	1	1	1	1	1	1	1	1	1	1	1	1	1	1	1	1	1	1
GO:0004437	obsolete inositol or phosphatidylinositol phosphatase activity	molecular_function	1	1	1	1	1	1	1	1	1	1	1	1	1	1	1	1	1	1	1	1	1	1	1	1	1	1	1	1	1	1	1	1	1	1	1	1	1	1	1	1	1	1	1	1	1	1	1
GO:0004448	isocitrate dehydrogenase activity	molecular_function	1	1	1	1	1	1	1	1	1	1	1	1	1	1	1	1	1	1	1	1	1	1	1	1	1	1	1	1	1	1	1	1	1	1	1	1	1	1	1	1	1	1	1	1	1	1	1
GO:0004468	lysine N-acetyltransferase activity	acting on acetyl phosphate as donor	molecular_function	1	1	1	1	1	1	1	1	1	1	1	1	1	1	1	1	1	1	1	1	1	1	1	1	1	1	1	1	1	1	1	1	1	1	1	1	1	1	1	1	1	1	1	1	1	1
GO:0004497	monooxygenase activity	molecular_function	1	1	1	1	1	1	1	1	1	1	1	1	1	1	1	1	1	1	1	1	1	1	1	1	1	1	1	1	1	1	1	1	1	1	1	1	1	1	1	1	1	1	1	1	1	1	1
GO:0004499	N	N-dimethylaniline monooxygenase activity	molecular_function	1	1	1	1	1	1	1	1	1	1	1	1	1	1	1	1	1	1	1	1	1	1	1	1	1	1	1	1	1	1	1	1	1	1	1	1	1	1	1	1	1	1	1	1	1	1
GO:0004518	nuclease activity	molecular_function	1	9.184e-11	0.0008224	1	1	1	1	1	1	1	1	1	1	1	1	1	1	1	1	1	1	1	1	1	1	1	1	1	1	1	1	1	1	1	1	1	1	1	1	1	1	1	1	1	1	1	1
GO:0004519	endonuclease activity	molecular_function	1	9.12e-05	0.0082057	1	1	1	0.00760349	1	1	1	1	1	1	1	1	1	1	1	1	1	1	1	1	1	1	1	1	1	1	1	1	1	1	1	1	1	1	1	1	1	1	1	1	1	1	1	1
GO:0004520	endodeoxyribonuclease activity	molecular_function	1	1	1	1	1	1	1	1	1	1	1	1	1	1	1	1	1	1	1	1	1	1	1	1	1	1	1	1	1	1	1	1	1	1	1	1	1	1	1	1	1	1	1	1	1	1	1
GO:0004521	endoribonuclease activity	molecular_function	1	1	1	1	1	1	1	1	1	1	1	1	1	1	1	1	1	1	1	1	1	1	1	1	1	1	1	1	1	1	1	1	1	1	1	1	1	1	1	1	1	1	1	1	1	1	1
GO:0004523	RNA-DNA hybrid ribonuclease activity	molecular_function	1	1	1	1	1	1	1	1	1	1	1	1	1	1	1	1	1	1	1	1	1	1	1	1	1	1	1	1	1	1	1	1	1	1	1	1	1	1	1	1	1	1	1	1	1	1	1
GO:0004527	exonuclease activity	molecular_function	1	1	1	1	1	1	1	1	1	1	1	1	1	1	1	1	1	1	1	1	1	1	1	1	1	1	1	1	1	1	1	1	1	1	1	1	1	1	1	1	1	1	1	1	1	1	1
GO:0004532	exoribonuclease activity	molecular_function	1	1	1	1	1	1	1	1	1	1	1	1	1	1	1	1	1	1	1	1	1	1	1	1	1	1	1	1	1	1	1	1	1	1	1	1	1	1	1	1	1	1	1	1	1	1	1
GO:0004536	deoxyribonuclease activity	molecular_function	1	1	1	1	1	1	1	1	1	1	1	1	1	1	1	1	1	1	1	1	1	1	1	1	1	1	1	1	1	1	1	1	1	1	1	1	1	1	1	1	1	1	1	1	1	1	1
GO:0004540	ribonuclease activity	molecular_function	1	4.032e-06	1	1	1	1	1	1	1	1	1	1	1	1	1	1	1	1	1	1	1	1	1	1	1	1	1	1	1	1	1	1	1	1	1	1	1	1	1	1	1	1	1	1	1	1	1
GO:0004553	hydrolase activity	hydrolyzing O-glycosyl compounds	molecular_function	1	1	1	1	1	1	1	1	1	1	1	1	1	1	1	1	1	1	1	1	1	1	1	1	1	1	1	1	1	1	1	1	1	1	1	1	1	1	1	1	1	1	1	1	1	1
GO:0004555	alpha	alpha-trehalase activity	molecular_function	1	1	1	1	1	1	1	1	1	1	1	1	1	1	1	1	1	1	1	1	1	1	1	1	1	1	1	1	1	1	1	1	1	1	1	1	1	1	1	1	1	1	1	1	1	1
GO:0004568	chitinase activity	molecular_function	1	1	1	1	1	1	1	1	1	1	1	1	1	1	1	1	1	1	1	1	1	1	1	1	1	1	1	1	1	1	1	1	1	1	1	1	1	1	1	1	1	1	1	1	1	1	1
GO:0004571	mannosyl-oligosaccharide 1	2-alpha-mannosidase activity	molecular_function	1	1	1	1	1	1	1	1	1	1	1	1	1	1	1	1	1	1	1	1	1	1	1	1	1	1	1	1	1	1	1	1	1	1	1	1	1	1	1	1	1	1	1	1	1	1
GO:0004601	peroxidase activity	molecular_function	1	1	1	1	1	1	1	1	1	1	1	1	1	1	1	1	1	1	1	1	1	1	1	1	1	1	1	1	1	1	1	1	1	1	1	1	1	1	1	1	1	1	1	1	1	1	1
GO:0004602	glutathione peroxidase activity	molecular_function	1	1	1	1	1	1	1	1	1	1	1	1	1	1	1	1	1	1	1	1	1	1	1	1	1	1	1	1	1	1	1	1	1	1	1	1	1	1	1	1	1	1	1	1	1	1	1
GO:0004620	phospholipase activity	molecular_function	1	1	1	1	1	1	1	1	1	1	1	1	1	1	1	1	1	1	1	1	1	1	1	1	1	1	1	1	1	1	1	1	1	1	1	1	1	1	1	1	1	1	1	1	1	1	1
GO:0004623	phospholipase A2 activity	molecular_function	1	1	1	1	1	1	1	1	1	1	1	1	1	1	1	1	1	1	1	1	1	1	1	1	1	1	1	1	1	1	1	1	1	1	1	1	1	1	1	1	1	1	1	1	1	1	1
GO:0004629	phospholipase C activity	molecular_function	1	1	1	1	1	1	1	1	1	1	1	1	1	1	1	1	1	1	1	1	1	1	1	1	1	1	1	1	1	1	1	1	1	1	1	1	1	1	1	1	1	1	1	1	1	1	1
GO:0004652	polynucleotide adenylyltransferase activity	molecular_function	1	0.00781939	1	1	1	1	1	1	1	1	1	1	1	1	1	1	1	1	1	1	1	1	1	1	1	1	1	1	1	1	1	1	1	1	1	1	1	1	1	1	1	1	1	1	1	1	1
GO:0004659	prenyltransferase activity	molecular_function	1	1	1	1	1	1	1	1	1	1	1	1	1	1	1	1	1	1	1	1	1	1	1	1	1	1	1	1	1	1	1	1	1	1	1	1	1	1	1	1	1	1	1	1	1	1	1
GO:0004672	protein kinase activity	molecular_function	1	1	1	1	1	1	1	1	1	1	1	1	1	0.00910371	1	1	1	1	1	1	1	1	1	1	1	1	1	1	1	1	1	1	1	1	1	1	1	1	1	1	1	1	1	1	1	1	1
GO:0004674	protein serine/threonine kinase activity	molecular_function	1	1	1	1	1	1	1	1	1	1	1	1	1	1	1	1	1	1	1	1	1	1	1	1	1	1	1	1	1	1	1	1	1	1	1	1	1	1	1	1	1	1	1	1	1	1	1
GO:0004675	transmembrane receptor protein serine/threonine kinase activity	molecular_function	1	1	1	1	1	1	1	1	1	1	1	1	1	1	1	1	1	1	1	1	1	1	1	1	1	1	1	1	1	1	1	1	1	1	1	1	1	1	1	1	1	1	1	1	1	1	1
GO:0004683	calmodulin-dependent protein kinase activity	molecular_function	1	1	1	1	1	1	1	1	1	1	1	1	1	1	1	1	1	1	1	1	1	1	1	1	1	1	1	1	1	1	1	1	1	1	1	1	1	1	1	1	1	1	1	1	1	1	1
GO:0004697	protein kinase C activity	molecular_function	1	1	1	1	1	1	1	1	1	1	1	1	1	1	1	1	1	1	1	1	1	1	1	1	1	1	1	1	1	1	0.00712131	1	1	1	1	1	1	1	1	1	1	1	1	1	1	1	1
GO:0004702	receptor signaling protein serine/threonine kinase activity	molecular_function	1	1	1	1	1	1	1	1	1	1	1	1	1	1	1	1	1	1	1	1	1	1	1	1	1	1	1	1	1	1	1	1	1	1	1	1	1	1	1	1	1	1	1	1	1	1	1
GO:0004707	MAP kinase activity	molecular_function	1	1	1	1	1	1	1	1	1	1	1	1	1	1	1	1	1	1	1	1	1	1	1	1	1	1	1	1	1	1	1	1	1	1	1	1	1	1	1	1	1	1	1	1	1	1	1
GO:0004713	protein tyrosine kinase activity	molecular_function	1	1	1	1	1	1	1	1	1	1	1	1	1	1	1	1	1	1	1	1	1	1	1	1	1	1	1	1	1	1	1	1	1	1	1	1	1	1	1	1	1	1	1	1	1	1	1
GO:0004714	transmembrane receptor protein tyrosine kinase activity	molecular_function	1	1	1	1	1	1	1	1	1	1	1	1	1	1	1	1	1	1	1	1	1	1	1	1	1	1	1	1	1	1	1	1	1	1	1	1	1	1	1	1	1	1	1	1	1	1	1
GO:0004721	phosphoprotein phosphatase activity	molecular_function	1	1	1	1	1	1	1	1	1	1	1	1	1	1	1	1	1	1	1	1	1	1	1	1	1	1	1	1	1	1	1	1	1	1	1	1	1	1	1	1	1	1	1	1	1	1	1
GO:0004722	protein serine/threonine phosphatase activity	molecular_function	1	1	1	1	1	1	1	1	1	1	1	1	1	1	1	1	1	1	1	1	1	1	1	1	1	1	1	1	1	1	1	1	1	1	1	1	1	1	1	1	1	1	1	1	1	1	1
GO:0004725	protein tyrosine phosphatase activity	molecular_function	1	1	1	1	1	1	1	1	1	1	1	1	1	1	1	1	1	1	1	1	1	1	1	1	1	1	1	1	1	1	1	1	1	1	1	1	1	1	1	1	1	1	1	1	1	1	1
GO:0004748	ribonucleoside-diphosphate reductase activity	thioredoxin disulfide as acceptor	molecular_function	1	1	1	1	1	1	1	1	1	1	1	1	1	1	1	1	1	1	1	1	1	1	1	1	1	1	1	1	1	1	1	1	1	1	1	1	1	1	1	1	1	1	1	1	1	1
GO:0004768	stearoyl-CoA 9-desaturase activity	molecular_function	1	1	1	1	1	1	1	1	1	1	1	1	1	1	1	1	1	1	1	1	1	1	1	1	1	1	1	1	1	1	1	1	1	1	1	1	1	1	1	1	1	1	1	1	1	1	1
GO:0004806	triglyceride lipase activity	molecular_function	1	1	1	1	1	1	1	1	1	1	1	1	1	1	1	1	1	1	1	1	1	1	1	1	1	1	1	1	1	1	1	1	1	1	1	1	1	1	1	1	1	1	1	1	1	1	1
GO:0004812	aminoacyl-tRNA ligase activity	molecular_function	1	1	1	1	1	1	1	1	1	1	1	1	1	1	1	1	1	1	1	1	1	1	1	1	1	1	1	1	1	1	1	1	1	1	1	1	1	1	1	1	1	1	1	1	1	1	1
GO:0004815	aspartate-tRNA ligase activity	molecular_function	1	1	1	1	1	1	1	1	1	1	1	1	1	1	1	1	1	1	1	1	1	1	1	1	1	1	1	1	1	1	1	1	1	1	1	1	1	1	1	1	1	1	1	1	1	1	1
GO:0004817	cysteine-tRNA ligase activity	molecular_function	1	1	1	1	1	1	1	1	1	1	1	1	1	1	1	1	1	1	1	1	1	1	1	1	1	1	1	1	1	1	1	1	1	1	1	1	1	1	1	1	1	1	1	1	1	1	1
GO:0004835	tubulin-tyrosine ligase activity	molecular_function	1	1	1	1	1	1	1	1	1	1	1	1	1	1	1	1	1	1	1	1	1	1	1	1	1	1	1	1	1	1	1	1	1	1	1	1	1	1	1	1	1	1	1	1	1	1	1
GO:0004842	ubiquitin-protein transferase activity	molecular_function	1	0.00904397	1	1	1	1	1	1	1	1	1	1	1	1	1	1	1	1	1	1	1	1	1	1	1	1	1	1	1	1	1	1	1	1	1	1	1	1	0.0011392	1	1	1	1	1	1	1	1
GO:0004857	enzyme inhibitor activity	molecular_function	1	1	1	1	1	1	1	1	1	1	1	1	0.00672771	0.0011328	1.5392e-09	1	1	1	1	1	1	0.00859917	1	1	1	0.00963184	1	1	1	1	1	1	1	1	1	1	1	1	1	0.0026528	1	1	0.00349789	1	0.00806954	1	1
GO:0004866	endopeptidase inhibitor activity	molecular_function	1	1	1	1	1	1	1	1	1	1	1	1	1	0.00526797	3.776e-09	1	1	1	1	1	1	1	1	1	1	1	1	1	1	1	1	1	1	1	1	1	1	1	1	0.00640669	1	1	1	1	0.00655168	1	1
GO:0004867	serine-type endopeptidase inhibitor activity	molecular_function	1	1	1	1	1	1	1	1	1	1	1	1	1	0.003072	1.6416e-07	1	1	1	1	1	1	1	1	1	1	0.00705594	1	1	1	1	1	1	1	1	1	1	1	1	1	0.00912822	1	1	1	1	0.0019392	1	1
GO:0004871	signal transducer activity	molecular_function	1	1	1	1	1	1	1	1	1	1	1	1	1	1	1	1	1	1	1	1	1	1	1	1	1	1	1	2.3296e-05	0.001824	1	1	1	1	1	1	1	1	1	1	1	1	1	1	1	1	1	1
GO:0004872	receptor activity	molecular_function	1	1	1	1	1	1	1	1	1	1	1	1	1	1	1	1	1	1	1	1	1	1	1	1	1	1	1	0.000384	0.00447142	0.00605491	1	1	1	1	1	1	1	1	1	1	1	1	1	1	1	1	1
GO:0004879	RNA polymerase II transcription factor activity	ligand-activated sequence-specific DNA binding	molecular_function	1	1	1	1	1	1	1	1	1	1	1	1	1	1	1	1	1	1	1	1	1	1	1	1	1	1	1	1	1	1	1	1	1	1	1	1	1	1	1	1	1	1	1	1	1	1
GO:0004888	transmembrane signaling receptor activity	molecular_function	1	1	1	1	1	1	1	1	1	1	1	1	1	1	1	1	1	1	1	1	1	1	1	1	1	1	1	3.328e-05	4.32e-05	0.000944	1	1	1	1	1	1	1	1	1	1	1	1	1	1	1	1	1
GO:0004889	acetylcholine-activated cation-selective channel activity	molecular_function	1	1	1	1	1	1	1	1	1	1	1	1	1	1	1	1	1	1	1	1	1	1	1	1	1	1	1	2.4992e-07	0.00025344	1	1	1	1	1	1	1	1	1	1	1	1	1	1	1	1	4.576e-05	1
GO:0004930	G-protein coupled receptor activity	molecular_function	1	1	1	1	1	1	1	1	1	1	1	1	1	1	1	1	1	1	1	1	1	1	1	1	1	1	1	5.184e-08	7.616e-11	1.1584e-10	1	1	1	1	1	1	1	1	1	1	1	1	1	1	1	1.3952e-05	1
GO:0004970	ionotropic glutamate receptor activity	molecular_function	1	1	1	1	1	1	1	1	1	1	1	1	1	1	1	1	1	1	1	1	1	1	1	1	1	1	1	0.00022656	1	1	1	1	1	1	1	1	1	1	1	1	1	1	1	1	1	1	1
GO:0004983	neuropeptide Y receptor activity	molecular_function	1	1	1	1	1	1	1	1	1	1	1	1	1	1	1	1	1	1	1	1	1	1	1	1	1	1	1	1	1.984e-06	3.872e-05	1	1	1	1	1	1	1	1	1	1	1	1	1	1	1	1	1
GO:0005024	transforming growth factor beta-activated receptor activity	molecular_function	1	1	1	1	1	1	1	1	1	1	1	1	1	1	1	1	1	1	1	1	1	1	1	1	1	1	1	1	1	1	1	1	1	1	1	1	1	1	1	1	1	1	1	1	1	1	1
GO:0005057	receptor signaling protein activity	molecular_function	1	1	1	1	1	1	1	1	1	1	1	1	1	1	1	1	1	1	1	1	1	1	1	1	1	1	1	1	1	1	1	1	1	1	1	1	1	1	1	1	1	1	1	1	1	1	1
GO:0005085	guanyl-nucleotide exchange factor activity	molecular_function	1	1	1	1	1	1	1	1	1	1	1	1	1	1	0.0025696	1	1	1	1	1	1	1	1	1	1	1	1	1	1	1	1	1	1	1	1	1	1	1	0.0015168	1	1	1	1	1	1	1	1
GO:0005086	ARF guanyl-nucleotide exchange factor activity	molecular_function	1	1	1	1	1	1	1	1	1	1	1	1	1	1	1	1	1	1	1	1	1	1	1	1	1	1	1	1	1	1	1	1	1	1	1	1	1	1	1	1	1	1	1	1	1	1	1
GO:0005088	Ras guanyl-nucleotide exchange factor activity	molecular_function	1	1	1	1	1	1	1	1	1	1	1	1	1	1	1	1	1	1	1	1	1	1	1	1	1	1	1	1	1	1	1	1	1	1	1	1	1	1	0.00817242	1	1	1	1	1	1	1	1
GO:0005089	Rho guanyl-nucleotide exchange factor activity	molecular_function	1	1	1	1	1	1	1	1	1	1	1	1	1	1	1	1	1	1	1	1	1	1	1	1	1	1	1	1	1	1	1	1	1	1	1	1	1	1	1	1	1	1	1	1	1	1	1
GO:0005096	GTPase activator activity	molecular_function	1	1	1	1	1	1	1	1	1	1	1	1	1	1	1	1	1	1	1	1	1	1	1	1	1	1	1	1	1	1	1	1	1	1	1	1	1	1	1	1	1	1	1	1	1	1	1
GO:0005102	receptor binding	molecular_function	1	1	1	1	1	1	1	1	1	1	1	1	1	1	1	1	1	1	1	1	1	1	1	1	1	1	1	1	1	1	1	1	1	1	1	1	1	1	1	1	1	1	1	1	1	1	1
GO:0005109	frizzled binding	molecular_function	1	1	1	1	1	1	1	1	1	1	1	1	1	1	1	1	1	1	1	1	1	1	1	1	1	1	1	1	1	1	1	1	1	1	1	1	1	1	1	1	1	1	1	1	1	1	1
GO:0005179	hormone activity	molecular_function	1	1	1	1	1	1	1	1	1	1	1	1	1	1	1	1	1	1	1	1	1	1	1	1	1	1	1	1	1	1	1	1	1	1	1	1	1	1	1	1	1	1	1	1	1	1	1
GO:0005198	structural molecule activity	molecular_function	1	1	1	1	1	1	1	1	1	1	1	1	1	1	1	1	1	1	1	1	1	1	1	1	1	1	1	1	1	1	1	1	1	1	3.936e-05	1	1	1	1	8.224e-05	1	3.0688e-06	1	1	1	1	1.648e-18
GO:0005200	structural constituent of cytoskeleton	molecular_function	1	1	1	1	1	1	1	1	1	1	1	1	1	1	1	1	1	1	1	1	1	1	1	1	1	1	1	1	1	1	1	1	1	1	1	1	1	1	1	1	1	1	1	1	1	1	1
GO:0005215	transporter activity	molecular_function	1	1	1	1	1	1	1	1	1	1	1	1	1	1	1	1	1	1	1	1	1	1	1	1	1	1	4.416e-12	7.84e-24	8.736e-32	4.512e-22	5.504e-06	1	1	1	1	1	1	1	1	1	1	1	1	1	1	3.84e-10	1
GO:0005216	ion channel activity	molecular_function	1	1	1	1	1	1	1	1	1	1	1	1	1	1	1	1	1	1	1	1	1	1	1	1	1	1	2.6144e-12	3.808e-39	3.328e-42	1.3312e-27	1.0496e-09	1	1	1	1	1	1	1	1	1	1	1	1	1	1	7.104e-19	1
GO:0005227	calcium activated cation channel activity	molecular_function	1	1	1	1	1	1	1	1	1	1	1	1	1	1	1	1	1	1	1	1	1	1	1	1	1	1	1	1	1	1	1	1	1	1	1	1	1	1	1	1	1	1	1	1	1	1	1
GO:0005230	extracellular ligand-gated ion channel activity	molecular_function	1	1	1	1	1	1	1	1	1	1	1	1	1	1	1	1	1	1	1	1	1	1	1	1	1	1	2.0448e-07	2.2944e-22	3.264e-23	1.3984e-15	1	1	1	1	1	1	1	1	1	1	1	1	1	1	1	1.1648e-08	1
GO:0005231	excitatory extracellular ligand-gated ion channel activity	molecular_function	1	1	1	1	1	1	1	1	1	1	1	1	1	1	1	1	1	1	1	1	1	1	1	1	1	1	0.00018144	5.568e-11	3.616e-07	0.0029984	1	1	1	1	1	1	1	1	1	1	1	1	1	1	1	8.672e-07	1
GO:0005234	extracellular-glutamate-gated ion channel activity	molecular_function	1	1	1	1	1	1	1	1	1	1	1	1	1	1	1	1	1	1	1	1	1	1	1	1	1	1	1	0.0010112	1	1	1	1	1	1	1	1	1	1	1	1	1	1	1	1	1	1	1
GO:0005244	voltage-gated ion channel activity	molecular_function	1	1	1	1	0.00320566	1	1	1	1	1	1	1	1	1	1	1	1	1	1	1	1	1	1	1	1	1	1	1	0.0004256	1	0.000512	1	1	1	1	1	1	1	1	1	1	1	1	1	1	1	1
GO:0005245	voltage-gated calcium channel activity	molecular_function	1	1	1	1	1	1	1	1	1	1	1	1	1	1	1	1	1	1	1	1	1	1	1	1	1	1	1	1	1	1	0.0024992	1	1	1	1	1	1	1	1	1	1	1	1	1	1	1	1
GO:0005247	voltage-gated chloride channel activity	molecular_function	1	1	1	1	1	1	1	1	1	1	1	1	1	1	1	1	1	1	1	1	1	1	1	1	1	1	1	1	1	1	1	1	1	1	1	1	1	1	1	1	1	1	1	1	1	1	1
GO:0005249	voltage-gated potassium channel activity	molecular_function	1	1	1	1	0.000688	1	1	1	1	1	1	1	1	1	1	1	1	1	1	1	1	1	1	1	1	1	1	1	8.448e-05	1	1	1	1	1	1	1	1	1	1	1	1	1	1	1	1	1	1
GO:0005253	anion channel activity	molecular_function	1	1	1	1	1	1	1	1	1	1	1	1	1	1	1	1	1	1	1	1	1	1	1	1	1	1	1	1	1	1	1	1	1	1	1	1	1	1	1	1	1	1	1	1	1	1	1
GO:0005254	chloride channel activity	molecular_function	1	1	1	1	1	1	1	1	1	1	1	1	1	1	1	1	1	1	1	1	1	1	1	1	1	1	1	1	1	0.0035648	1	1	1	1	1	1	1	1	1	1	1	1	1	1	1	1	1
GO:0005261	cation channel activity	molecular_function	1	1	1	1	1	1	1	1	1	1	1	1	1	1	1	1	1	1	1	1	1	1	1	1	1	1	1.3376e-06	9.024e-22	2.896e-22	9.376e-15	9.024e-07	1	1	1	1	1	1	1	1	1	1	1	1	1	1	3.552e-13	1
GO:0005262	calcium channel activity	molecular_function	1	1	1	1	1	1	1	1	1	1	1	1	1	1	1	1	1	1	1	1	1	1	1	1	1	1	1	1	1	1	0.00016448	1	1	1	1	1	1	1	1	1	1	1	1	1	1	1	1
GO:0005267	potassium channel activity	molecular_function	1	1	1	1	0.0027808	1	1	1	1	1	1	1	1	1	1	1	1	1	1	1	1	1	1	1	1	1	9.792e-05	1.0944e-07	4.192e-15	5.088e-12	0.00556486	1	1	1	1	1	1	1	1	1	1	1	1	1	1	7.168e-06	1
GO:0005272	sodium channel activity	molecular_function	1	1	1	1	1	1	1	1	1	1	1	1	1	1	1	1	1	1	1	1	1	1	1	1	1	1	1	0.0001168	1	1	1	1	1	1	1	1	1	1	1	1	1	1	1	1	1	1	1
GO:0005275	amine transmembrane transporter activity	molecular_function	1	1	1	1	1	1	1	1	1	1	1	1	1	1	1	1	1	1	1	1	1	1	1	1	1	1	1	1	1	1	1	1	1	1	1	1	1	1	1	1	1	1	1	1	1	1	1
GO:0005310	dicarboxylic acid transmembrane transporter activity	molecular_function	1	1	1	1	1	1	1	1	1	1	1	1	1	1	1	1	1	1	1	1	1	1	1	1	1	1	1	1	0.00574275	0.00637149	1	1	1	1	1	1	1	1	1	1	1	1	1	1	1	1	1
GO:0005315	inorganic phosphate transmembrane transporter activity	molecular_function	1	1	1	1	1	1	1	1	1	1	1	1	1	1	1	1	1	1	1	1	1	1	1	1	1	1	1	1	1	1	1	1	1	1	1	1	1	1	1	1	1	1	1	1	1	1	1
GO:0005319	lipid transporter activity	molecular_function	1	1	1	1	1	1	1	1	1	1	1	1	1	1	1	1	1	1	1	1	1	1	1	1	1	1	1	1	1	1	1	1	1	1	1	1	1	1	1	1	1	1	1	1	1	1	1
GO:0005326	neurotransmitter transporter activity	molecular_function	1	1	1	1	1	1	1	1	1	1	1	1	1	1	1	1	1	1	1	1	1	1	1	1	1	1	1	1	1	1	1	1	1	1	1	1	1	1	1	1	1	1	1	1	1	1	1
GO:0005328	neurotransmitter:sodium symporter activity	molecular_function	1	1	1	1	1	1	1	1	1	1	1	1	1	1	1	1	1	1	1	1	1	1	1	1	1	1	1	1	1	1	1	1	1	1	1	1	1	1	1	1	1	1	1	1	1	1	1
GO:0005337	nucleoside transmembrane transporter activity	molecular_function	1	1	1	1	1	1	1	1	1	1	1	1	1	1	1	1	1	1	1	1	1	1	1	1	1	1	1	1	1	1	1	1	1	1	1	1	1	1	1	1	1	1	1	1	1	1	1
GO:0005338	nucleotide-sugar transmembrane transporter activity	molecular_function	1	1	1	1	1	1	1	1	1	1	1	1	1	1	1	1	1	1	1	1	1	1	1	1	1	1	1	1	1	1	1	1	1	1	1	1	1	1	1	1	1	1	1	1	1	1	1
GO:0005342	organic acid transmembrane transporter activity	molecular_function	1	1	1	1	1	1	1	1	1	1	1	1	1	1	1	1	1	1	1	1	1	1	1	1	1	1	1	1	0.00024992	0.0017728	1	1	1	1	1	1	1	1	1	1	1	1	1	1	1	1	1
GO:0005343	organic acid:sodium symporter activity	molecular_function	1	1	1	1	1	1	1	1	1	1	1	1	1	1	1	1	1	1	1	1	1	1	1	1	1	1	1	1	1	1	1	1	1	1	1	1	1	1	1	1	1	1	1	1	1	1	1
GO:0005351	sugar:proton symporter activity	molecular_function	1	1	1	1	1	1	1	1	1	1	1	1	1	1	1	1	1	1	1	1	1	1	1	1	1	1	1	1	1	1	1	1	1	1	1	1	1	1	1	1	1	1	1	1	1	1	1
GO:0005372	water transmembrane transporter activity	molecular_function	1	1	1	1	1	1	1	1	1	1	1	1	1	1	1	1	1	1	1	1	1	1	1	1	1	1	1	1	1	1	1	1	1	1	1	1	1	1	1	1	1	1	1	1	1	1	1
GO:0005375	copper ion transmembrane transporter activity	molecular_function	1	1	1	1	1	1	1	1	1	1	1	1	1	1	1	1	1	1	1	1	1	1	1	1	1	1	1	1	1	1	1	1	1	1	1	1	1	1	1	1	1	1	1	1	1	1	1
GO:0005381	iron ion transmembrane transporter activity	molecular_function	1	1	1	1	1	1	1	1	1	1	1	1	1	1	1	1	1	1	1	1	1	1	1	1	1	1	1	1	1	1	1	1	1	1	1	1	1	1	1	1	1	1	1	1	1	1	1
GO:0005388	calcium-transporting ATPase activity	molecular_function	1	1	1	1	1	1	1	1	1	1	1	1	1	1	1	1	1	1	1	1	1	1	1	1	1	1	1	1	1	1	1	1	1	1	1	1	1	1	1	1	1	1	1	1	1	1	1
GO:0005402	cation:sugar symporter activity	molecular_function	1	1	1	1	1	1	1	1	1	1	1	1	1	1	1	1	1	1	1	1	1	1	1	1	1	1	1	1	1	1	1	1	1	1	1	1	1	1	1	1	1	1	1	1	1	1	1
GO:0005451	monovalent cation:proton antiporter activity	molecular_function	1	1	1	1	1	1	1	1	1	1	1	1	1	1	1	1	1	1	1	1	1	1	1	1	1	1	1	1	1	1	1	1	1	1	1	1	1	1	1	1	1	1	1	1	1	1	1
GO:0005484	SNAP receptor activity	molecular_function	1	1	1	1	1	1	1	1	1	1	1	1	1	1	1	1	1	1	1	1	1	1	1	1	1	1	1	1	1	1	1	1	1	1	1	1	1	1	1	1	1	1	1	1	1	1	1
GO:0005488	binding	molecular_function	2.304e-26	1.168e-41	6.4e-24	1.0688e-06	1	0.0043976	1.1456e-07	6.848e-06	0.0004672	8.288e-06	1	1	1	1.344e-06	6.592e-08	1	8.992e-06	3.968e-12	4.32e-13	1	2.5888e-08	8.288e-11	1	1	1	1	1	1	1	1	1	3.232e-13	4e-32	1	1	3.0272e-11	1.696e-14	6.176e-12	7.328e-14	1	0.00020256	1.1168e-09	9.216e-11	0.0007104	1	1	1
GO:0005496	steroid binding	molecular_function	1	1	1	1	1	1	1	1	1	1	1	1	1	1	1	1	1	1	1	1	1	1	1	1	1	1	1	1	1	1	1	1	1	1	1	1	1	1	1	1	1	1	1	1	1	1	1
GO:0005504	fatty acid binding	molecular_function	1	1	1	1	1	1	1	1	1	1	1	1	1	1	1	1	1	1	1	1	1	1	1	1	1	1	1	1	1	1	1	1	1	1	1	1	1	1	1	1	1	1	1	1	1	1	1
GO:0005506	iron ion binding	molecular_function	1	1	1	1	1	1	1	1	1	1	1	1	1	1	1	1	1	1	1	1	1	1	1	1	1	1	1	1	0.0023808	4.704e-06	1	1	1	1	1	1	1	1	1	1	1	1	1	1	1	1	1
GO:0005507	copper ion binding	molecular_function	1	1	1	1	1	1	1	1	1	1	1	1	1	1	1	1	1	1	1	1	1	1	1	1	1	1	1	1	1	1	1	1	1	1	1	1	1	1	1	1	1	1	1	1	1	1	1
GO:0005509	calcium ion binding	molecular_function	1	1	1	1	1	1	1	1	1	1	1	1	1	1	4.64e-14	1	1	1	1	1	1	0.0001552	0.00018336	0.0023136	0.00539133	1	1	1	1	1	1	1	1	1	1	1	1	1	8.448e-07	9.504e-05	1	5.536e-07	5.376e-11	2.8928e-12	3.392e-05	1	1
GO:0005515	protein binding	molecular_function	2.6816e-35	6.528e-41	1.6064e-21	0.00017056	1	1	4.224e-08	1	1	1	1	1	1	2.2176e-06	2.5344e-07	1	1	9.856e-05	2.64e-06	1	0.0015616	1	1	1	1	1	1	1	1	1	1	0.00636662	6.208e-33	2.6688e-05	1	1.2928e-12	1.7888e-05	1	0.0008352	3.936e-06	1	5.184e-13	2.512e-07	1.5232e-08	1	1	1
GO:0005516	calmodulin binding	molecular_function	1	1	1	1	1	1	1	1	1	1	1	1	1	1	1	1	1	1	1	1	1	1	1	1	1	1	1	1	1	1	1	1	1	1	1	1	1	1	1	1	1	1	1	1	1	1	1
GO:0005524	ATP binding	molecular_function	3.168e-06	3.936e-09	0.0004064	1	1	0.00704976	1	1	1	1	1	1	1	1	1	1	1	1	1	1	1	1	1	1	1	1	1	1	1	1	1	1	4.416e-13	1	1	1	1	1	1.0304e-10	1	1	1	1	1	1	1	1
GO:0005525	GTP binding	molecular_function	1	1	1	1	1	1	1	1	1	1	1	1	1	1	1	1	1	1	1	1	1	1	1	1	1	1	1	1	1	1	1	1	1	1	1	1	1	1	1	1	1	1	1	1	1	1	1
GO:0005543	phospholipid binding	molecular_function	1	1	1	1	1	1	1	1	1	1	1	1	1	1	1	1	1	1	1	1	1	1	1	1	1	1	1	1	1	1	1	1	0.002064	1	1	1	1	1	1	1	1	1	1	1	1	1	1
GO:0005545	1-phosphatidylinositol binding	molecular_function	1	1	1	1	1	1	1	1	1	1	1	1	1	1	1	1	1	1	1	1	1	1	1	1	1	1	1	1	1	1	1	1	1	1	1	1	1	1	1	1	1	1	1	1	1	1	1
GO:0005548	phospholipid transporter activity	molecular_function	1	1	1	1	1	1	1	1	1	1	1	1	1	1	1	1	1	1	1	1	1	1	1	1	1	1	1	1	1	1	1	1	1	1	1	1	1	1	1	1	1	1	1	1	1	1	1
GO:0005575	cellular_component	cellular_component	1	1	1	1	1	1	1	1	1	1	1	1	1	1	1	1	1	1	1	1	1	1	1	1	1	1	1	1.2512e-06	1.4944e-12	5.248e-09	0.0021664	1	1	1	1	1	1	1	1	0.00018432	1	0.0001456	1	0.00499347	1	0.0017792	1
GO:0005576	extracellular region	cellular_component	1	1	1	1	1	1	1	1	1	1	1	1	1	1	0.0027456	1	1	1	1	1	1	1	1	0.0008544	1	1	1	1	1	1	1	1	1	1	1	1	1	1	0.0008864	3.024e-10	1	1.9744e-05	2.2368e-05	3.0464e-07	1	1	0.00731872
GO:0005578	proteinaceous extracellular matrix	cellular_component	1	1	1	1	1	1	1	1	1	1	1	1	1	1	0.0005152	1	1	1	1	1	1	1	1	0.00589056	1	1	1	1	1	1	1	1	1	1	1	1	1	1	1.36e-06	8.928e-07	0.000128	1.8688e-08	2.048e-08	1.4048e-08	1	1	1
GO:0005604	basement membrane	cellular_component	1	1	1	1	1	1	1	1	1	1	1	1	1	1	1	1	1	1	1	1	1	1	1	1	1	1	1	1	1	1	1	1	1	1	1	1	1	1	3.152e-05	0.0019808	0.0031168	0.00024416	1.1552e-05	0.0037176	1	1	1
GO:0005615	extracellular space	cellular_component	1	1	1	1	1	1	1	1	1	1	1	1	1	1	1	1	1	1	1	1	1	1	1	1	1	1	1	1	1	1	1	1	1	1	1	1	1	1	1	1	1	1	1	1	1	1	1
GO:0005622	intracellular	cellular_component	7.712e-26	6.88e-39	2.8416e-27	1	1	1	9.184e-18	2.1504e-10	0.00717754	8.288e-07	1	1	1	8.64e-05	1	1	1	2.3328e-22	1.1008e-12	0.00010816	4.544e-05	1	1	1	1	1	1	1	1	1	1	1.664e-13	1.0688e-24	0.00010016	0.00019072	4.992e-31	8.704e-38	1.7184e-27	3.008e-06	1	4.224e-11	9.952e-10	0.00806752	1	1	1	1
GO:0005623	cell	cellular_component	1	1	1	1	1	1	1	1	1	1	1	1	1	1	1	1	1	1	1	1	1	1	1	1	1	1	1	8.992e-06	8.704e-11	2.9312e-07	0.00548672	1	1	1	1	1	1	1	1	0.00888778	1	0.0008224	1	1	1	1	1
GO:0005624	obsolete membrane fraction	cellular_component	1	1	1	1	1	1	1	1	1	1	1	1	1	1	1	1	1	1	1	1	1	1	1	1	1	1	1	1	1	1	1	1	1	1	1	1	1	1	1	1	1	1	1	1	1	1	1
GO:0005625	obsolete soluble fraction	cellular_component	1	1	1	1	1	1	1	1	1	1	1	1	1	1	1	1	1	1	1	1	1	1	1	1	1	1	1	1	1	1	1	1	1	1	1	1	1	1	1	1	1	1	1	1	1	1	1
GO:0005626	obsolete insoluble fraction	cellular_component	1	1	1	1	1	1	1	1	1	1	1	1	1	1	1	1	1	1	1	1	1	1	1	1	1	1	1	1	1	1	1	1	1	1	1	1	1	1	1	1	1	1	1	1	1	1	1
GO:0005634	nucleus	cellular_component	1	0.00015136	1.44e-07	0.00337072	1	1	1.0208e-22	3.776e-08	1	2.5568e-09	1	1	1	1	1	1	7.488e-06	9.728e-20	2.0224e-06	1	0.00023776	1	1	1	1	1	1	1	1	1	1	2.24e-14	1	1	2.064e-06	3.488e-33	6.656e-37	5.696e-30	1	1	1.4912e-07	4.992e-06	1	1	1	1	1
GO:0005635	nuclear envelope	cellular_component	1	1	1	1	1	1	1	1	1	1	1	1	1	1	1	1	1	1	1	1	1	1	1	1	1	1	1	1	1	1	1	1	1	1	1	1	1	1	1	1	1	1	1	1	1	1	1
GO:0005643	nuclear pore	cellular_component	1	1	1	1	1	1	1	1	1	1	1	1	1	1	1	1	1	1	1	1	1	1	1	1	1	1	1	1	1	1	1	1	1	1	1	1	1	1	1	1	1	1	1	1	1	1	1
GO:0005654	nucleoplasm	cellular_component	1	1	1	1	1	1	0.00497344	1	1	1	1	1	1	1	1	1	1	0.00018976	1	1	1	1	1	1	1	1	1	1	1	1	1	0.0025408	1	1	1	1.2064e-05	9.312e-08	0.0003552	1	1	1	1	1	1	1	1	1
GO:0005667	transcription factor complex	cellular_component	1	1	1	1	1	1	1	1	1	1	1	1	1	1	1	1	1	1	1	1	1	1	1	1	1	1	1	1	1	1	1	1	1	1	1	0.00602262	1	1	1	1	1	1	1	1	1	1	1
GO:0005669	transcription factor TFIID complex	cellular_component	1	1	1	1	1	1	1	1	1	1	1	1	1	1	1	1	1	1	1	1	1	1	1	1	1	1	1	1	1	1	1	1	1	1	1	1	1	1	1	1	1	1	1	1	1	1	1
GO:0005681	spliceosomal complex	cellular_component	1	1	1	1	1	1	1	1	1	1	1	1	1	1	1	1	1	1	1	1	1	1	1	1	1	1	1	1	1	1	1	1	1	1	1	1	1	1	1	1	1	1	1	1	1	1	1
GO:0005694	chromosome	cellular_component	1	0.00794218	0.0005632	1	1	2.4768e-05	9.504e-23	1.104e-16	1	1.3248e-13	1	1	1	1	1	1	1	1.7632e-14	8.992e-05	0.002832	1	1	1	1	1	1	1	1	1	1	1	1.5264e-10	1	1	1	1.44e-30	4.224e-73	1.1328e-61	1	2.1952e-10	1.8656e-14	1	1	1	1	1	1
GO:0005730	nucleolus	cellular_component	1	1	1	1	1	1	1	1	1	1	1	1	1	1	1	1	1	1	1	1	1	1	1	1	1	1	1	1	1	1	1	1	1	1	1	1	1	1	1	1	1	1	1	1	1	1	1
GO:0005737	cytoplasm	cellular_component	3.936e-26	4.32e-31	2.5568e-11	1	1	1	1	1	1	1	1	1	1	1	1	1	1	0.0021664	1	1	1	1	1	1	1	1	1	1	1	1	1	1	7.392e-28	1	1	1	1	1	1	1	0.0004032	1	1	1	1	1	1
GO:0005739	mitochondrion	cellular_component	0.0005056	1.0176e-08	0.0005216	1	1	1	1	1	1	1	1	1	1	1	1	1	1	1	1	1	1	1	1	1	1	1	1	1	1	1	1	1	1	1	1	1	1	1	1	1	1	1	1	1	1	1	1
GO:0005740	mitochondrial envelope	cellular_component	1	0.0006176	0.00394653	1	1	1	1	1	1	1	1	1	1	1	1	1	1	1	1	1	1	1	1	1	1	1	1	1	1	1	1	1	1	1	0.0014496	1	1	1	1	1	1	1	1	1	1	1	1
GO:0005741	mitochondrial outer membrane	cellular_component	1	1	1	1	1	1	1	1	1	1	1	1	1	1	1	1	1	1	1	1	1	1	1	1	1	1	1	1	1	1	1	1	1	1	1	1	1	1	1	1	1	1	1	1	1	1	1
GO:0005743	mitochondrial inner membrane	cellular_component	1	0.00413722	0.00367482	1	1	1	1	1	1	1	1	1	1	1	1	1	1	1	1	1	1	1	1	1	1	1	1	1	1	1	1	1	1	1	1	1	1	1	1	1	1	1	1	1	1	1	1
GO:0005746	mitochondrial respiratory chain	cellular_component	1	1	1	1	1	1	1	1	1	1	1	1	1	1	1	1	1	1	1	1	1	1	1	1	1	1	1	1	1	1	1	1	1	1	1	1	1	1	1	1	1	1	1	1	1	1	1
GO:0005753	mitochondrial proton-transporting ATP synthase complex	cellular_component	1	1	0.00765469	1	1	1	1	1	1	1	1	1	1	1	1	1	1	1	1	1	1	1	1	1	1	1	1	1	1	1	1	1	1	1	1	1	1	1	1	1	1	1	1	1	1	1	1
GO:0005759	mitochondrial matrix	cellular_component	1	1	1	1	1	1	1	1	1	1	1	1	1	1	1	1	1	1	1	1	1	1	1	1	1	1	1	1	1	1	1	1	1	1	1	1	1	1	1	1	1	1	1	1	1	1	1
GO:0005761	mitochondrial ribosome	cellular_component	1	1	1	1	1	1	1	1	1	1	1	1	1	1	1	1	1	1	1	1	1	1	1	1	1	1	1	1	1	1	1	1	1	1	1	1	1	1	1	1	1	1	1	1	1	1	1
GO:0005764	lysosome	cellular_component	1	1	1	1	1	1	1	1	1	1	1	1	1	1	1	1	1	1	1	1	1	1	1	1	1	1	1	1	1	1	1	1	1	1	1	1	1	1	1	1	1	1	1	1	1	1	1
GO:0005765	lysosomal membrane	cellular_component	1	1	1	1	1	1	1	1	1	1	1	1	1	1	1	1	1	1	1	1	1	1	1	1	1	1	1	1	1	1	1	1	1	1	1	1	1	1	1	1	1	1	1	1	1	1	1
GO:0005768	endosome	cellular_component	1	1	1	1	1	1	1	1	1	1	1	1	1	1	1	1	1	1	1	1	1	1	1	1	1	1	1	1	1	1	1	1	1	1	1	1	1	1	1	1	1	1	1	1	1	1	1
GO:0005769	early endosome	cellular_component	1	1	1	1	1	1	1	1	1	1	1	1	1	1	1	1	1	1	1	1	1	1	1	1	1	1	1	1	1	1	1	1	1	1	1	1	1	1	1	1	1	1	1	1	1	1	1
GO:0005773	vacuole	cellular_component	1	1	1	1	1	1	1	1	1	1	1	1	1	1	1	1	1	1	1	1	1	1	1	1	1	1	1	1	1	1	1	1	1	1	1	1	1	1	1	1	1	1	1	1	1	1	1
GO:0005774	vacuolar membrane	cellular_component	1	1	1	1	1	1	1	1	1	1	1	1	1	1	1	1	1	1	1	1	1	1	1	1	1	1	1	1	1	1	1	1	1	1	1	1	1	1	1	1	1	1	1	1	1	1	1
GO:0005777	peroxisome	cellular_component	1	1	1	1	1	1	1	1	1	1	1	1	1	1	1	1	1	1	1	1	1	1	1	1	1	1	1	1	1	1	1	0.00833594	1	1	1	1	1	1	1	1	0.0005248	1	1	1	1	1	1
GO:0005783	endoplasmic reticulum	cellular_component	0.00859514	0.00022368	1	1	1	1	1	1	1	1	1	1	1	1	1	1	1	1	1	1	0.0009536	1	1	1	1	1	1	1	1	1	1	1	0.0009024	1	1	1	1	1	1	1	1	1	1	1	1	1	1
GO:0005789	endoplasmic reticulum membrane	cellular_component	1	0.00032	1	1	1	1	1	1	1	1	1	1	1	1	1	1	1	1	1	1	1	1	1	1	1	1	1	1	1	1	1	1	1	1	1	1	1	1	1	1	1	1	1	1	1	1	1
GO:0005794	Golgi apparatus	cellular_component	1	1	1	1	1	1	1	1	1	1	1	1	1	1	1	1	1	1	1	1	1	1	1	1	1	1	1	1	1	1	1	1	1	1	1	1	1	1	1	1	1	1	1	1	1	1	1
GO:0005795	Golgi stack	cellular_component	1	1	1	1	1	1	1	1	1	1	1	1	1	1	1	1	1	1	1	1	1	1	1	1	1	1	1	1	1	1	1	1	1	1	1	1	1	1	1	1	1	1	1	1	1	1	1
GO:0005798	Golgi-associated vesicle	cellular_component	1	1	1	1	1	1	1	1	1	1	1	1	1	1	1	1	1	1	1	1	1	1	1	1	1	1	1	1	1	1	1	1	1	1	1	1	1	1	1	1	1	1	1	1	1	1	1
GO:0005801	cis-Golgi network	cellular_component	1	1	1	1	1	1	1	1	1	1	1	1	1	1	1	1	1	1	1	1	1	1	1	1	1	1	1	1	1	1	1	1	1	1	1	1	1	1	1	1	1	1	1	1	1	1	1
GO:0005813	centrosome	cellular_component	1	0.0020256	1	1	1	1	1	1	1	1	1	1	1	1	1	1	1	1	1	1	1	1	1	1	1	1	1	1	1	1	1	1	1	1	1	6.304e-08	4.864e-07	1	1	1	1	1	1	1	1	1	1
GO:0005814	centriole	cellular_component	1	1	1	1	1	1	1	1	1	1	1	1	1	1	1	1	1	1	1	1	1	1	1	1	1	1	1	1	1	1	1	1	1	1	1	1	3.36e-05	1	1	1	1	1	1	1	1	1	1
GO:0005815	microtubule organizing center	cellular_component	1	1	1	1	1	1	1	1	1	1	1	1	1	1	1	1	1	1	1	1	1	1	1	1	1	1	1	1	1	1	1	1	1	1	1	6.688e-07	2.912e-06	1	1	1	1	1	1	1	1	1	1
GO:0005818	aster	cellular_component	1	1	1	1	1	1	1	1	0.0013856	1	1	1	1	1	1	1	1	1	1	1	1	1	1	1	1	1	1	1	1	1	1	1	1	1	1	1	1	1	1	1	1	1	1	1	1	1	1
GO:0005819	spindle	cellular_component	1	1	1	1	1	1	0.00013472	1	0.0069833	1	1	1	1	1	1	1	1	1	1	1	1	1	1	1	1	1	1	1	1	1	1	1	1	1	1	5.408e-07	2.3872e-12	4.832e-06	1	1	1	1	1	1	1	1	1
GO:0005829	cytosol	cellular_component	0.00926643	0.002336	1	1	1	1	1	1	1	1	1	1	1	1	1	1	1	1	1	1	1	1	1	1	1	1	1	1	1	1	1	1	0.0003936	1	1	1	1	1	1	1	1	1	1	1	1	1	1
GO:0005834	heterotrimeric G-protein complex	cellular_component	1	1	1	1	1	1	1	1	1	1	1	1	1	1	1	1	1	1	1	1	1	1	1	1	1	1	1	1	1	1	1	1	1	1	1	1	1	1	1	1	1	1	1	1	1	1	1
GO:0005839	proteasome core complex	cellular_component	3.936e-10	2.2208e-11	4.032e-10	1	1	1	1	1	1	1	1	1	1	1	1	1	1	1	1	1	1	1	1	1	1	1	1	1	1	1	1	1	5.408e-05	2.272e-09	1	1	1	1	1	1	1	1	1	1	1	1	1
GO:0005840	ribosome	cellular_component	1	1	1	1	1	1	1	1	1	1	1	1	1	1	1	1	1	1	1	1	1	1	1	1	1	1	1	1	1	1	1	1	1	1	1	1	1	1	1	1	5.536e-10	1	1	1	1	1	1
GO:0005856	cytoskeleton	cellular_component	1	1	1	1	1	1	1	1	1	1	1	1	1	0.00515043	1	1	1	1	1	1	1	1	1	1	1	1	1	1	1	1	1	1	1	1	1	9.056e-06	1.4048e-08	1	0.0027104	1	1	0.00879418	0.00322243	6.176e-05	5.056e-05	1	1
GO:0005859	muscle myosin complex	cellular_component	1	1	1	1	1	1	1	1	1	1	1	1	1	1	1	1	1	1	1	1	1	1	1	1	1	1	1	1	1	1	1	1	1	1	1	1	1	1	1	1	1	1	1	1	0.0054841	1	1
GO:0005865	striated muscle thin filament	cellular_component	1	1	1	1	1	1	1	1	1	1	1	1	1	1	1	1	1	1	1	1	1	1	1	1	1	1	1	1	1	1	1	1	1	1	1	1	1	1	1	1	1	1	1	1	1	1	1
GO:0005871	kinesin complex	cellular_component	1	1	1	1	1	1	1	1	1	1	1	1	1	1	1	1	1	1	1	1	1	1	1	1	1	1	1	1	1	1	1	1	1	1	1	1	1	1	1	1	1	1	1	1	1	1	1
GO:0005874	microtubule	cellular_component	1	1	1	1	1	1	1	1	1	1	1	1	1	1	1	1	1	1	1	1	1	1	1	1	1	1	1	1	1	1	1	1	1	1	1	1	1	1	1	1	1	1	1	1	1	1	1
GO:0005875	microtubule associated complex	cellular_component	1	1	1	1	1	1	1	1	1	1	1	1	1	1	1	1	1	1	1	1	1	1	1	1	1	1	1	1	1	1	1	1	1	1	1	1	1	1	1	1	1	1	1	1	1	1	1
GO:0005876	spindle microtubule	cellular_component	1	1	1	1	1	1	1	1	1	1	1	1	1	1	1	1	1	1	1	1	1	1	1	1	1	1	1	1	1	1	1	1	1	1	1	1	1	1	1	1	1	1	1	1	1	1	1
GO:0005882	intermediate filament	cellular_component	1	1	1	1	1	1	1	1	1	1	1	1	1	1	1	1	1	1	1	1	1	1	1	1	1	1	1	1	1	1	1	1	1	1	1	1	1	1	1	1	1	0.000592	1	1	1	1	1
GO:0005884	actin filament	cellular_component	1	1	1	1	1	1	1	1	1	1	1	1	1	1	1	1	1	1	1	1	1	1	1	1	1	1	1	1	1	1	1	1	1	1	1	1	1	1	1	1	1	1	1	1	1	1	1
GO:0005886	plasma membrane	cellular_component	1	1	1	1	1	1	1	1	1	1	1	1	1	1	3.0368e-09	1	1	1	1	1	1	2.1248e-07	1	1	0.0006688	1	0.00441142	1	1	1	1	1	1	1	1	1	1	1	7.616e-09	5.504e-09	1	7.744e-10	2.4928e-10	1.9584e-16	0.00350691	0.0013344	1
GO:0005887	integral component of plasma membrane	cellular_component	1	1	1	1	0.0013472	1	1	1	1	1	1	1	1	1	1	1	1	1	1	1	1	1	1	1	1	1	1	1	0.0005952	1	1	1	1	1	1	1	1	1	1	1	1	1	1	1	1	1	1
GO:0005905	coated pit	cellular_component	1	1	1	1	1	1	1	1	1	1	1	1	1	1	1	1	1	1	1	1	1	1	1	1	1	1	1	1	1	1	1	1	1	1	1	1	1	1	1	1	1	1	1	1	1	1	1
GO:0005911	cell-cell junction	cellular_component	1	1	1	1	1	1	1	1	1	1	1	1	1	1	1	1	1	1	1	1	1	0.00863261	1	1	1	1	1	1	1	1	1	1	1	1	1	1	1	1	0.00594198	0.00422538	1	3.84e-06	3.328e-09	4.64e-09	1	1	1
GO:0005912	adherens junction	cellular_component	1	1	1	1	1	1	1	1	1	1	1	1	1	0.0014048	0.0006752	1	1	1	1	1	1	1	1	1	1	1	1	1	1	1	1	1	1	1	1	1	1	1	0.004416	0.00777194	1	1	1	0.0053569	1	1	1
GO:0005913	cell-cell adherens junction	cellular_component	1	1	1	1	1	1	1	1	1	1	1	1	1	0.00012768	0.0011552	1	1	1	1	1	1	1	1	1	1	1	1	1	1	1	1	1	1	1	1	1	1	1	0.0022112	0.0014016	1	1	1	0.00642368	1	1	1
GO:0005921	gap junction	cellular_component	1	1	1	1	1	1	1	1	1	1	1	1	1	1	1	1	1	1	1	1	1	1	1	1	1	1	1	1	1	1	1	1	1	1	1	1	1	1	1	1	1	0.00999798	7.424e-06	0.00018816	1	1	1
GO:0005929	cilium	cellular_component	1	1	1	1	1	1	1	1	1	1	1	1	1	1	1	1	1	1	1	1	1	1	1	1	7.776e-07	0.0010784	1	1	1	1	1	1	1	1	1	1	1	1	1	1	1	1	1	5.696e-06	0.00023136	1	1
GO:0005930	axoneme	cellular_component	1	1	1	1	1	1	1	1	1	1	1	1	1	1	1	1	1	1	1	1	1	1	1	1	0.00021952	1	1	1	1	1	1	1	1	1	1	1	1	1	1	1	1	1	1	1	0.00875955	1	1
GO:0005938	cell cortex	cellular_component	0.0016288	1.1488e-06	1	1	1	1	1	1	1	1	1	1	1	1	1	1	1	1	1	1	1	1	1	1	1	1	1	1	1	1	1	1	2.7296e-07	1	1	1	1	1	1	1	1	1	1	1	1	1	1
GO:0005942	phosphatidylinositol 3-kinase complex	cellular_component	1	1	1	1	1	1	1	1	1	1	1	1	1	1	1	1	1	1	1	1	1	1	1	1	1	1	1	1	1	1	1	1	1	1	1	1	1	1	1	1	1	1	1	1	1	1	1
GO:0005975	carbohydrate metabolic process	biological_process	1	1	1	1	1	1	1	1	1	1	1	1	1	1	1	1	1	1	1	1	1	1	1	1	1	1	1	1	1	1	1	1	1	1	1	1	1	1	1	1	1	1	1	1	1	1	1
GO:0005976	polysaccharide metabolic process	biological_process	1	1	1	1	1	1	1	1	1	1	1	1	1	1	1	1	1	1	1	1	1	1	1	1	1	1	1	1	1	1	1	1	1	1	1	1	1	1	1	1	1	1	1	1	1	1	1
GO:0005977	glycogen metabolic process	biological_process	1	1	1	1	1	1	1	1	1	1	1	1	1	1	1	1	1	1	1	1	1	1	1	1	1	1	1	1	1	1	1	1	1	1	1	1	1	1	1	1	1	1	1	1	1	1	1
GO:0005984	disaccharide metabolic process	biological_process	1	1	1	1	1	1	1	1	1	1	1	1	1	1	1	1	1	1	1	1	1	1	1	1	1	1	1	1	1	1	1	1	1	1	1	1	1	1	1	1	1	1	1	1	1	1	1
GO:0005991	trehalose metabolic process	biological_process	1	1	1	1	1	1	1	1	1	1	1	1	1	1	1	1	1	1	1	1	1	1	1	1	1	1	1	1	1	1	1	1	1	1	1	1	1	1	1	1	1	1	1	1	1	1	1
GO:0005996	monosaccharide metabolic process	biological_process	0.00834688	1	1	1	0.0025376	1	1	1	1	1	1	1	1	1	1	1	1	1	1	1	1	1	1	1	1	1	1	1	1	1	1	1	1	1	1	1	1	1	1	1	1	1	1	1	1	1	1
GO:0006006	glucose metabolic process	biological_process	7.136e-05	1	1	1	1	1	1	1	1	1	1	1	1	1	1	1	1	1	1	1	1	1	1	1	1	1	1	1	1	1	1	1	1	1	1	1	1	1	1	1	1	1	1	1	1	1	1
GO:0006007	glucose catabolic process	biological_process	0.00017184	1	1	1	1	1	1	1	1	1	1	1	1	1	1	1	1	1	1	1	1	1	1	1	1	1	1	1	1	1	1	1	1	1	1	1	1	1	1	1	1	1	1	1	1	1	1
GO:0006013	mannose metabolic process	biological_process	1	1	1	1	1	1	1	1	1	1	1	1	1	1	1	1	1	1	1	1	1	1	1	1	1	1	1	1	1	1	1	1	1	1	1	1	1	1	1	1	1	1	1	1	1	1	1
GO:0006022	aminoglycan metabolic process	biological_process	1	1	1	1	1	1	1	1	1	1	1	1	1	1	1	1	1	1	1	1	1	1	1	1	1	1	1	1	1	1	1	1	1	1	1	1	1	1	1	1	1	1	1	1	1	1	1
GO:0006023	aminoglycan biosynthetic process	biological_process	1	1	1	1	1	1	1	1	1	1	1	1	1	1	1	1	1	1	1	1	1	1	1	1	1	1	1	1	1	1	1	1	1	1	1	1	1	1	1	1	1	1	1	1	1	1	1
GO:0006024	glycosaminoglycan biosynthetic process	biological_process	1	1	1	1	1	1	1	1	1	1	1	1	1	1	1	1	1	1	1	1	1	1	1	1	1	1	1	1	1	1	1	1	1	1	1	1	1	1	1	1	1	1	1	1	1	1	1
GO:0006026	aminoglycan catabolic process	biological_process	1	1	1	1	1	1	1	1	1	1	1	1	1	1	1	1	1	1	1	1	1	1	1	1	1	1	1	1	1	1	1	1	1	1	1	1	1	1	1	1	1	1	1	1	1	1	1
GO:0006030	chitin metabolic process	biological_process	1	1	1	1	1	1	1	1	1	1	1	1	1	1	1	1	1	1	1	1	1	1	1	1	1	1	1	1	1	1	1	1	1	1	1	1	1	1	1	1	1	1	1	1	1	1	1
GO:0006032	chitin catabolic process	biological_process	1	1	1	1	1	1	1	1	1	1	1	1	1	1	1	1	1	1	1	1	1	1	1	1	1	1	1	1	1	1	1	1	1	1	1	1	1	1	1	1	1	1	1	1	1	1	1
GO:0006066	alcohol metabolic process	biological_process	1	1	1	1	1	1	1	1	1	1	1	1	1	1	1	1	1	1	1	1	1	1	1	1	1	1	1	1	1	1	1	1	1	1	1	1	1	1	1	1	1	1	1	1	1	1	1
GO:0006071	glycerol metabolic process	biological_process	1	1	1	1	1	1	1	1	1	1	1	1	1	1	1	1	1	1	1	1	1	1	1	1	1	1	1	1	1	1	1	1	1	1	1	1	1	1	1	1	1	1	1	1	1	1	1
GO:0006072	glycerol-3-phosphate metabolic process	biological_process	1	1	1	1	1	1	1	1	1	1	1	1	1	1	1	1	1	1	1	1	1	1	1	1	1	1	1	1	1	1	1	1	1	1	1	1	1	1	1	1	1	1	1	1	1	1	1
GO:0006073	cellular glucan metabolic process	biological_process	1	1	1	1	1	1	1	1	1	1	1	1	1	1	1	1	1	1	1	1	1	1	1	1	1	1	1	1	1	1	1	1	1	1	1	1	1	1	1	1	1	1	1	1	1	1	1
GO:0006082	organic acid metabolic process	biological_process	1	0.0025216	1	1	1	1	1	1	1	1	1	1	1	1	1	1	1	1	1	1	1	1	1	1	1	1	1	1	1	1	1	1	1	1	1	1	1	1	1	1	0.0005728	1	1	1	1	1	1
GO:0006084	acetyl-CoA metabolic process	biological_process	2.5312e-05	3.712e-07	0.0038848	1	1	1	1	1	1	1	1	1	1	1	1	1	1	1	1	1	1	1	1	1	1	1	1	1	1	1	1	1	1	1	1	1	1	1	1	1	1	1	1	1	1	1	1
GO:0006090	pyruvate metabolic process	biological_process	1	1	1	1	1	1	1	1	1	1	1	1	1	1	1	1	1	1	1	1	1	1	1	1	1	1	1	1	1	1	1	1	1	1	1	1	1	1	1	1	1	1	1	1	1	1	1
GO:0006091	generation of precursor metabolites and energy	biological_process	0.00024832	0.0006944	1	1	1	1	1	1	1	1	1	1	1	1	1	1	1	1	1	1	1	1	1	1	1	1	1	1	1	1	1	1	1	1	1	1	1	1	1	1	1	1	1	1	1	1	1
GO:0006094	gluconeogenesis	biological_process	1	1	1	1	1	1	1	1	1	1	1	1	1	1	1	1	1	1	1	1	1	1	1	1	1	1	1	1	1	1	1	1	1	1	1	1	1	1	1	1	1	1	1	1	1	1	1
GO:0006096	glycolytic process	biological_process	0.00017824	1	1	1	1	1	1	1	1	1	1	1	1	1	1	1	1	1	1	1	1	1	1	1	1	1	1	1	1	1	1	1	1	1	1	1	1	1	1	1	1	1	1	1	1	1	1
GO:0006098	pentose-phosphate shunt	biological_process	1	1	1	1	1	1	1	1	1	1	1	1	1	1	1	1	1	1	1	1	1	1	1	1	1	1	1	1	1	1	1	1	1	1	1	1	1	1	1	1	1	1	1	1	1	1	1
GO:0006099	tricarboxylic acid cycle	biological_process	0.0011968	1.2896e-05	1	1	1	1	1	1	1	1	1	1	1	1	1	1	1	1	1	1	1	1	1	1	1	1	1	1	1	1	1	1	1	1	1	1	1	1	1	1	1	1	1	1	1	1	1
GO:0006112	energy reserve metabolic process	biological_process	1	1	1	1	1	1	1	1	1	1	1	1	1	1	1	1	1	1	1	1	1	1	1	1	1	1	1	1	1	1	1	1	1	1	1	1	1	1	1	1	1	1	1	1	1	1	1
GO:0006119	oxidative phosphorylation	biological_process	1	1	1	1	1	1	1	1	1	1	1	1	1	1	1	1	1	1	1	1	1	1	1	1	1	1	1	1	1	1	1	1	1	1	1	1	1	1	1	1	0.002192	1	1	1	1	1	1
GO:0006120	mitochondrial electron transport	NADH to ubiquinone	biological_process	1	1	1	1	1	1	1	1	1	1	1	1	1	1	1	1	1	1	1	1	1	1	1	1	1	1	1	1	1	1	1	1	1	1	1	1	1	1	1	1	0.000848	1	1	1	1	1
GO:0006139	nucleobase-containing compound metabolic process	biological_process	1	2.9504e-09	1.6192e-15	2.0576e-06	1	1	1.3696e-07	0.00922701	1	1	1	1	1	1	1	1	4.512e-07	4.512e-06	1	1	0.0005856	1	1	1	1	1	1	1	1	1	1	2.5664e-07	1	1	3.552e-05	9.088e-16	6.88e-07	2.1344e-06	1	1	1	1	1	1	1	1	1
GO:0006140	regulation of nucleotide metabolic process	biological_process	1	1	1	1	1	1	1	1	1	1	1	1	1	1	1	1	1	1	1	1	1	1	1	1	1	1	1	1	1	1	1	1	1	1	1	1	1	1	1	1	1	1	1	1	1	1	1
GO:0006163	purine nucleotide metabolic process	biological_process	1	1	1	1	1	1	1	1	1	1	1	1	1	1	1	1	1	1	1	1	1	1	1	1	1	1	0.00358048	3.904e-07	1	1	0.00360797	1	0.0012672	1	1	1	1	1	1	1	1	1	1	1	1	1	1
GO:0006164	purine nucleotide biosynthetic process	biological_process	1	1	1	1	1	1	1	1	1	1	1	1	1	1	1	1	1	1	1	1	1	1	1	1	1	1	0.00471293	1.8176e-08	1	1	1.6288e-05	1	1	1	1	1	1	1	1	1	1	1	1	1	1	1	1
GO:0006182	cGMP biosynthetic process	biological_process	1	1	1	1	1	1	1	1	1	1	1	1	1	1	1	1	1	1	1	1	1	1	1	1	1	1	1	3.456e-07	1	1	1	1	1	1	1	1	1	1	1	1	1	1	1	1	1	1	1
GO:0006184	obsolete GTP catabolic process	biological_process	1	1	1	1	1	1	1	1	1	1	1	1	1	1	1	1	1	1	1	1	1	1	1	1	1	1	1	1	1	1	1	1	1	1	1	1	1	1	1	1	1	1	1	1	1	1	1
GO:0006195	purine nucleotide catabolic process	biological_process	1	1	1	1	1	1	1	1	1	1	1	1	1	1	1	1	1	1	1	1	1	1	1	1	1	1	1	1	1	1	1	1	1	1	1	1	1	1	1	1	1	1	1	1	1	1	1
GO:0006206	pyrimidine nucleobase metabolic process	biological_process	1	1	1	1	1	1	1	1	1	1	1	1	1	1	1	1	1	1	1	1	1	1	1	1	1	1	1	1	1	1	1	1	1	1	1	1	1	1	1	1	1	1	1	1	1	1	1
GO:0006213	pyrimidine nucleoside metabolic process	biological_process	1	1	1	1	1	1	1	1	1	1	1	1	1	1	1	1	1	1	1	1	1	1	1	1	1	1	1	1	1	1	1	1	1	1	1	1	1	1	1	1	1	1	1	1	1	1	1
GO:0006220	pyrimidine nucleotide metabolic process	biological_process	1	1	1	1	1	1	1	1	1	1	1	1	1	1	1	1	1	1	1	1	1	1	1	1	1	1	1	1	1	1	1	1	1	1	1	1	1	1	1	1	1	1	1	1	1	1	1
GO:0006221	pyrimidine nucleotide biosynthetic process	biological_process	1	1	1	1	1	1	1	1	1	1	1	1	1	1	1	1	1	1	1	1	1	1	1	1	1	1	1	1	1	1	1	1	1	1	1	1	1	1	1	1	1	1	1	1	1	1	1
GO:0006259	DNA metabolic process	biological_process	0.00019232	5.76e-20	4.928e-13	1	1	1	1.088e-06	1	1	1	1	1	1	1	1	1	1	1	1	1	1	1	1	1	1	1	1	1	1	1	1	1	0.0004	1	1	3.936e-23	3.232e-17	0.00016992	1	1	1	1	1	1	1	1	1
GO:0006260	DNA replication	biological_process	1	1	5.536e-05	1	1	1	4.096e-06	1	1	1	1	1	1	1	1	1	1	1	1	1	1	1	1	1	1	1	1	1	1	1	1	1	1	1	0.00018272	4.416e-19	6.4e-19	0.0011872	1	1	1	1	1	1	1	1	1
GO:0006261	DNA-dependent DNA replication	biological_process	1	1	0.00705133	1	1	1	1	1	1	1	1	1	1	1	1	1	1	1	1	1	1	1	1	1	1	1	1	1	1	1	1	1	1	1	1	3.392e-08	2.1984e-07	1	1	1	1	1	1	1	1	1	1
GO:0006265	DNA topological change	biological_process	1	1	1	1	1	1	1	1	1	1	1	1	1	1	1	1	1	1	1	1	1	1	1	1	1	1	1	1	1	1	1	1	1	1	1	1	1	1	1	1	1	1	1	1	1	1	1
GO:0006270	DNA replication initiation	biological_process	1	1	1	1	1	1	1	1	1	1	1	1	1	1	1	1	1	1	1	1	1	1	1	1	1	1	1	1	1	1	1	1	1	1	0.0019136	3.1456e-07	3.36e-05	1	1	1	1	1	1	1	1	1	1
GO:0006275	regulation of DNA replication	biological_process	1	1	1	1	1	1	1	1	1	1	1	1	1	1	1	1	1	1	1	1	1	1	1	1	1	1	1	1	1	1	1	1	1	1	1	1	1	1	1	1	1	1	1	1	1	1	1
GO:0006281	DNA repair	biological_process	6.432e-05	5.024e-20	3.904e-06	1	1	1	1	1	1	1	1	1	1	1	1	1	1	1	1	1	1	1	1	1	1	1	1	1	1	1	1	1	0.0003232	1	1	3.424e-07	1	1	1	1	1	1	1	1	1	1	1
GO:0006289	nucleotide-excision repair	biological_process	1	1	1	1	1	1	1	1	1	1	1	1	1	1	1	1	1	1	1	1	1	1	1	1	1	1	1	1	1	1	1	1	1	1	1	1	1	1	1	1	1	1	1	1	1	1	1
GO:0006298	mismatch repair	biological_process	1	1	1	1	1	1	1	1	1	1	1	1	1	1	1	1	1	1	1	1	1	1	1	1	1	1	1	1	1	1	1	1	1	1	1	1	1	1	1	1	1	1	1	1	1	1	1
GO:0006302	double-strand break repair	biological_process	1	1	1	1	1	1	1	1	1	1	1	1	1	1	1	1	1	1	1	1	1	1	1	1	1	1	1	1	1	1	1	1	1	1	1	1	1	1	1	1	1	1	1	1	1	1	1
GO:0006304	DNA modification	biological_process	1	1	1	1	1	1	1	1	1	1	1	1	1	1	1	1	1	1	1	1	1	1	1	1	1	1	1	1	1	1	1	1	1	1	1	1	1	1	1	1	1	1	1	1	1	1	1
GO:0006305	DNA alkylation	biological_process	1	1	1	1	1	1	1	1	1	1	1	1	1	1	1	1	1	1	1	1	1	1	1	1	1	1	1	1	1	1	1	1	1	1	1	1	1	1	1	1	1	1	1	1	1	1	1
GO:0006306	DNA methylation	biological_process	1	1	1	1	1	1	1	1	1	1	1	1	1	1	1	1	1	1	1	1	1	1	1	1	1	1	1	1	1	1	1	1	1	1	1	1	1	1	1	1	1	1	1	1	1	1	1
GO:0006308	DNA catabolic process	biological_process	1	1	1	1	1	1	0.00800867	1	1	1	1	1	1	1	1	1	1	1	1	1	1	1	1	1	1	1	1	1	1	1	1	1	1	1	1	0.00327632	1	1	1	1	1	1	1	1	1	1	1
GO:0006309	apoptotic DNA fragmentation	biological_process	1	1	1	1	1	1	1	1	1	1	1	1	1	1	1	1	1	1	1	1	1	1	1	1	1	1	1	1	1	1	1	1	1	1	1	1	1	1	1	1	1	1	1	1	1	1	1
GO:0006310	DNA recombination	biological_process	2.3072e-06	2.304e-08	1	1	1	1	1	1	1	1	1	1	1	1	1	1	1	1	1	1	1	1	1	1	1	1	1	1	1	1	1	1	0.0006144	1	1	1	1	1	1	1	1	1	1	1	1	1	1
GO:0006323	DNA packaging	biological_process	1	1	1	1	1	1	4.576e-16	8.864e-16	1	3.68e-18	1	1	1	1	1	1	1	5.344e-12	1.3952e-06	0.0021088	1	1	1	1	1	1	1	1	1	1	1	5.536e-06	1	1	1	5.216e-16	6.08e-60	4.96e-64	1	5.76e-28	3.264e-30	1	1	1	1	1	1
GO:0006325	chromatin organization	biological_process	1	1	1	1	1	1	1.9328e-16	1.0368e-14	1	1.344e-17	1	1	1	1	1	1	1	3.1328e-13	0.00013216	0.00330288	1	1	1	1	1	1	1	1	1	1	1	9.76e-08	1	1	1	1.9744e-13	8.064e-48	2.9728e-51	1	4.064e-18	9.44e-24	1	1	1	1	1	1
GO:0006333	chromatin assembly or disassembly	biological_process	1	1	1	1	1	1	1.2896e-15	2.9696e-16	1	1.1872e-19	1	1	1	1	1	1	1	4.832e-15	9.504e-06	0.0007072	1	1	1	1	1	1	1	1	1	1	1	2.2304e-08	1	1	1	3.232e-13	1.0368e-53	1.7696e-57	1	1.9552e-23	5.824e-29	1	1	1	1	1	1
GO:0006334	nucleosome assembly	biological_process	1	1	1	1	1	1	1.6e-14	2.56e-16	1	7.424e-19	1	1	1	1	1	1	1	7.968e-13	4.96e-07	0.0012736	1	1	1	1	1	1	1	1	1	1	1	1.4752e-06	1	1	1	9.248e-13	7.328e-57	5.888e-61	1	3.296e-31	1.0784e-32	1	1	1	1	1	1
GO:0006342	chromatin silencing	biological_process	1	1	1	1	1	1	1	1	1	1	1	1	1	1	1	1	1	1	1	1	1	1	1	1	1	1	1	1	1	1	1	1	1	1	1	1	1	1	1	1	1	1	1	1	1	1	1
GO:0006351	transcription	DNA-templated	biological_process	1	1	1	1	1	1	1	0.0017024	1	1	1	1	1	1	1	1	0.00012032	6.752e-06	0.00321366	1	8.992e-07	1	1	0.00352605	1	1	1	1	1	1	1	1.92e-07	1	1	0.0002448	0.0001136	1	0.00023552	1	1	3.1872e-07	6.592e-07	1	1	1	1
GO:0006352	DNA-templated transcription	initiation	biological_process	1	1	0.0082057	1	1	1	1	1	1	1	1	1	1	1	1	1	1	1	1	1	1	1	1	1	1	1	1	1	1	1	1	1	1	1	1	1	1	1.8432e-14	1	0.00018208	3.008e-09	1	1	1	1	1
GO:0006354	DNA-templated transcription	elongation	biological_process	1	1	1	1	1	1	1	1	1	1	1	1	1	1	1	1	1	1	1	1	1	1	1	1	1	1	1	1	1	1	1	1	1	1	1	1	1	1	1	1	1	1	1	1	1	1
GO:0006355	regulation of transcription	DNA-templated	biological_process	1	1	1	1	1	1	1	1	1	1	1	1	1	1	1	1	5.472e-05	2.3232e-06	0.0010528	1	1.392e-07	1	1	0.0012992	1	1	1	1	1	1	1	5.12e-07	1	1	0.00804931	0.00112	1	1	1	1	0.00272	2.1056e-07	0.0042607	1	1	1
GO:0006357	regulation of transcription from RNA polymerase II promoter	biological_process	1	1	1	1	1	1	0.00424854	1	1	0.00128	1	1	1	1	1	1	1	2.2944e-06	0.001088	1	1	1	1	1	1	1	1	1	1	1	1	5.344e-06	1	1	0.00972038	0.0012512	1	1	1	1	0.0063353	0.0005568	1	1	1	1	1
GO:0006364	rRNA processing	biological_process	1	1	1	1	1	1	1	1	1	1	1	1	1	1	1	1	1	1	1	1	1	1	1	1	1	1	1	1	1	1	1	1	1	1	1	1	1	1	1	1	1	1	1	1	1	1	1
GO:0006366	transcription from RNA polymerase II promoter	biological_process	1	1	1	1	1	1	1	1	1	0.00324678	1	1	1	1	1	1	1	2.08e-05	0.00393635	1	1	1	1	1	1	1	1	1	1	1	1	5.536e-05	1	1	0.00498477	0.00566986	1	1	1	1	0.0083295	0.0007872	1	1	1	1	1
GO:0006367	transcription initiation from RNA polymerase II promoter	biological_process	1	0.00021024	1	1	1	1	1	1	1	1	1	1	1	1	1	1	1	1	1	1	1	1	1	1	1	1	1	1	1	1	1	1	1	1	1	1	1	1	1	1	1	1	1	1	1	1	1
GO:0006368	transcription elongation from RNA polymerase II promoter	biological_process	1	1	1	1	1	1	1	1	1	1	1	1	1	1	1	1	1	1	1	1	1	1	1	1	1	1	1	1	1	1	1	1	1	1	1	1	1	1	1	1	1	1	1	1	1	1	1
GO:0006396	RNA processing	biological_process	1	1	0.0004704	0.0002496	1	1	1	1	1	1	1	1	1	1	1	1	0.00013984	1	1	1	1	1	1	1	1	1	1	1	1	1	1	1	1	1	1	1	1	1	1	1	1	1	1	1	1	1	1
GO:0006397	mRNA processing	biological_process	1	1	1	0.0026432	1	1	1	1	1	1	1	1	1	1	1	1	1	1	1	1	1	1	1	1	1	1	1	1	1	1	1	1	1	1	1	1	1	1	1	1	1	1	1	1	1	1	1
GO:0006399	tRNA metabolic process	biological_process	1	0.0014752	1	1	1	1	1	1	1	1	1	1	1	1	1	1	1	1	1	1	1	1	1	1	1	1	1	1	1	1	1	1	1	1	1	1	1	1	1	1	1	1	1	1	1	1	1
GO:0006400	tRNA modification	biological_process	1	1	1	1	1	1	1	1	1	1	1	1	1	1	1	1	1	1	1	1	1	1	1	1	1	1	1	1	1	1	1	1	1	1	1	1	1	1	1	1	1	1	1	1	1	1	1
GO:0006401	RNA catabolic process	biological_process	1	1	1	1	1	1	1	1	1	1	1	1	1	1	1	1	1	1	1	1	1	1	1	1	1	1	1	1	1	1	1	1	1	1	1	1	1	1	1	1	1	1	1	1	1	1	1
GO:0006402	mRNA catabolic process	biological_process	1	1	1	1	1	1	1	1	1	1	1	1	1	1	1	1	1	1	1	1	1	1	1	1	1	1	1	1	1	1	1	1	1	1	1	1	1	1	1	1	1	1	1	1	1	1	1
GO:0006412	translation	biological_process	1	1	1	1	1	1	1	1	1	1	1	1	1	1	1	1	1	1	1	1	1	1	1	1	1	1	1	1	1	1	1	1	1	1	1	1	1	1	1	1	8.16e-06	1	1	1	1	1	1
GO:0006413	translational initiation	biological_process	1	1	1	1	1	1	1	1	1	1	1	1	1	1	1	1	1	1	1	1	1	1	1	1	1	1	1	1	1	1	1	1	1	1	1	1	1	1	1	1	1	1	1	1	1	1	1
GO:0006414	translational elongation	biological_process	1	1	1	1	1	1	1	1	1	1	1	1	1	1	1	1	1	1	1	1	1	1	1	1	1	1	1	1	1	1	1	1	1	1	1	1	1	1	1	1	1	1	1	1	1	1	1
GO:0006415	translational termination	biological_process	1	1	1	1	1	1	1	1	1	1	1	1	1	1	1	1	1	1	1	1	1	1	1	1	1	1	1	1	1	1	1	1	1	1	1	1	1	1	1	1	1	1	1	1	1	1	1
GO:0006417	regulation of translation	biological_process	0.001024	0.0018432	1	1	1	1	1	1	1	1	1	1	1	1	1	1	1	1	1	1	1	1	1	1	1	1	1	1	1	1	1	1	0.00025536	1	1	1	1	1	1	1	1	1	1	1	1	1	1
GO:0006418	tRNA aminoacylation for protein translation	biological_process	1	1	1	1	1	1	1	1	1	1	1	1	1	1	1	1	1	1	1	1	1	1	1	1	1	1	1	1	1	1	1	1	1	1	1	1	1	1	1	1	1	1	1	1	1	1	1
GO:0006422	aspartyl-tRNA aminoacylation	biological_process	1	1	1	1	1	1	1	1	1	1	1	1	1	1	1	1	1	1	1	1	1	1	1	1	1	1	1	1	1	1	1	1	1	1	1	1	1	1	1	1	1	1	1	1	1	1	1
GO:0006423	cysteinyl-tRNA aminoacylation	biological_process	1	1	1	1	1	1	1	1	1	1	1	1	1	1	1	1	1	1	1	1	1	1	1	1	1	1	1	1	1	1	1	1	1	1	1	1	1	1	1	1	1	1	1	1	1	1	1
GO:0006448	regulation of translational elongation	biological_process	1	1	1	1	1	1	1	1	1	1	1	1	1	1	1	1	1	1	1	1	1	1	1	1	1	1	1	1	1	1	1	1	1	1	1	1	1	1	1	1	1	1	1	1	1	1	1
GO:0006457	protein folding	biological_process	1	3.296e-06	1	1	1	1	1	1	1	1	1	1	1	1	1	1	1	1	1	1	1	1	1	1	1	1	1	1	1	1	1	1	1	1	1	1	1	1	1	1	1	1	1	1	1	1	1
GO:0006461	protein complex assembly	biological_process	1	1	1	1	1	1	1	1	1	1	1	1	1	1	1	1	1	1	1	1	1	1	1	0.00877786	1	1	1	1	1	1	1	1	1	1	1	1	1	1	1	1	1	1	2.3648e-06	4.064e-05	1	1	1
GO:0006464	cellular protein modification process	biological_process	1	1	1	1	1	1	1	1	1	1	1	1	1	1	1	1	1	1	1	1	1	1	1	1	1	1	1	1	1	1	1	1	1	1	1	1	1	1	1	1	1	1	1	1	1	1	1
GO:0006468	protein phosphorylation	biological_process	1	1	1	1	1	1	1	1	1	1	1	1	1	0.00791616	1	1	1	1	1	1	1	1	1	1	1	1	1	1	1	1	1	1	1	1	1	1	1	1	1	1	1	1	1	1	1	1	1
GO:0006470	protein dephosphorylation	biological_process	1	1	1	1	1	1	1	1	1	1	1	1	1	1	1	1	1	1	1	1	1	1	1	1	1	1	1	1	1	1	1	1	1	1	1	1	1	1	1	1	1	1	1	1	1	1	1
GO:0006476	protein deacetylation	biological_process	1	1	1	1	1	1	1	1	1	1	1	1	1	1	1	1	1	1	1	1	1	1	1	1	1	1	1	1	1	1	1	1	1	1	1	1	1	1	1	1	1	1	1	1	1	1	1
GO:0006479	protein methylation	biological_process	1	1	1	1	1	1	1	1	1	1	1	1	1	1	1	1	1	1	1	1	1	1	1	1	1	1	1	1	1	1	1	1	1	1	1	1	1	1	1	1	1	1	1	1	1	1	1
GO:0006486	protein glycosylation	biological_process	1	1	1	1	1	1	1	1	1	1	1	1	1	1	1	1	1	1	1	1	1	1	1	1	1	1	1	1	1	1	1	1	1	1	1	1	1	1	1	1	1	1	1	1	1	1	1
GO:0006487	protein N-linked glycosylation	biological_process	1	1	1	1	1	1	1	1	1	1	1	1	1	1	1	1	1	1	1	1	1	1	1	1	1	1	1	1	1	1	1	1	1	1	1	1	1	1	1	1	1	1	1	1	1	1	1
GO:0006497	protein lipidation	biological_process	1	1	1	1	1	1	1	1	1	1	1	1	1	1	1	1	1	1	1	1	1	1	1	1	1	1	1	1	1	1	1	1	1	1	1	1	1	1	1	1	1	1	1	1	1	1	1
GO:0006505	GPI anchor metabolic process	biological_process	1	1	1	1	1	1	1	1	1	1	1	1	1	1	1	1	1	1	1	1	1	1	1	1	1	1	1	1	1	1	1	1	1	1	1	1	1	1	1	1	1	1	1	1	1	1	1
GO:0006506	GPI anchor biosynthetic process	biological_process	1	1	1	1	1	1	1	1	1	1	1	1	1	1	1	1	1	1	1	1	1	1	1	1	1	1	1	1	1	1	1	1	1	1	1	1	1	1	1	1	1	1	1	1	1	1	1
GO:0006508	proteolysis	biological_process	1	1	1	1	1	1	1	1	1	1	1	1	1	1	1	1	1	1	1	1	1	1	1	1	1	1	1	1	1	1	1	1	1	1	1	1	1	1	1	1	1	1	1	1	1	0.00347046	1
GO:0006511	ubiquitin-dependent protein catabolic process	biological_process	0.00397075	3.584e-07	2.592e-05	8.672e-06	7.296e-06	1	1	1	1	1	1	1	1	1	1	1	0.0019456	1	1	1	1	1	1	1	1	1	1	1	1	1	1	1	1	0.00288	1	1	1	1	1	1	1	1	1	1	1	1	1
GO:0006516	glycoprotein catabolic process	biological_process	1	1	1	1	1	1	1	1	1	1	1	1	1	1	1	1	1	1	1	1	1	1	1	1	1	1	1	1	1	1	1	1	1	1	1	1	1	1	1	1	1	1	1	1	1	1	1
GO:0006518	peptide metabolic process	biological_process	1	1	1	1	1	1	1	1	1	1	1	1	1	1	1	1	1	1	1	1	1	1	1	1	1	1	1	1	1	1	1	1	1	1	1	1	1	1	1	1	1	1	1	1	1	1	1
GO:0006520	cellular amino acid metabolic process	biological_process	1	1	1	1	1	1	1	1	1	1	1	1	1	1	1	1	1	1	1	1	1	1	1	1	1	1	1	1	1	1	1	0.00985344	1	1	1	1	1	1	1	1	0.00021824	1	1	1	1	1	1
GO:0006528	asparagine metabolic process	biological_process	1	1	1	1	1	1	1	1	1	1	1	1	1	1	1	1	1	1	1	1	1	1	1	1	1	1	1	1	1	1	1	1	1	1	1	1	1	1	1	1	1	1	1	1	1	1	1
GO:0006529	asparagine biosynthetic process	biological_process	1	1	1	1	1	1	1	1	1	1	1	1	1	1	1	1	1	1	1	1	1	1	1	1	1	1	1	1	1	1	1	1	1	1	1	1	1	1	1	1	1	1	1	1	1	1	1
GO:0006534	cysteine metabolic process	biological_process	1	1	1	1	1	1	1	1	1	1	1	1	1	1	1	1	1	1	1	1	1	1	1	1	1	1	1	1	1	1	1	1	1	1	1	1	1	1	1	1	1	1	1	1	1	1	1
GO:0006541	glutamine metabolic process	biological_process	1	1	1	1	1	1	1	1	1	1	1	1	1	1	1	1	1	1	1	1	1	1	1	1	1	1	1	1	1	1	1	1	1	1	1	1	1	1	1	1	1	1	1	1	1	1	1
GO:0006542	glutamine biosynthetic process	biological_process	1	1	1	1	1	1	1	1	1	1	1	1	1	1	1	1	1	1	1	1	1	1	1	1	1	1	1	1	1	1	1	1	1	1	1	1	1	1	1	1	1	1	1	1	1	1	1
GO:0006544	glycine metabolic process	biological_process	1	1	1	1	1	1	1	1	1	1	1	1	1	1	1	1	1	1	1	1	1	1	1	1	1	1	1	1	1	1	1	1	1	1	1	1	1	1	1	1	1	1	1	1	1	1	1
GO:0006546	glycine catabolic process	biological_process	1	1	1	1	1	1	1	1	1	1	1	1	1	1	1	1	1	1	1	1	1	1	1	1	1	1	1	1	1	1	1	1	1	1	1	1	1	1	1	1	1	1	1	1	1	1	1
GO:0006555	methionine metabolic process	biological_process	1	1	1	1	1	1	1	1	1	1	1	1	1	1	1	1	1	1	1	1	1	1	1	1	1	1	1	1	1	1	1	1	1	1	1	1	1	1	1	1	1	1	1	1	1	1	1
GO:0006560	proline metabolic process	biological_process	1	1	1	1	1	1	1	1	1	1	1	1	1	1	1	1	1	1	1	1	1	1	1	1	1	1	1	1	1	1	1	1	1	1	1	1	1	1	1	1	1	1	1	1	1	1	1
GO:0006563	L-serine metabolic process	biological_process	1	1	1	1	1	1	1	1	1	1	1	1	1	1	1	1	1	1	1	1	1	1	1	1	1	1	1	1	1	1	1	1	1	1	1	1	1	1	1	1	1	1	1	1	1	1	1
GO:0006575	cellular modified amino acid metabolic process	biological_process	1	1	1	1	1	1	1	1	1	1	1	1	1	1	1	1	1	1	1	1	1	1	1	1	1	1	1	1	1	1	1	1	1	1	1	1	1	1	1	1	1	1	1	1	1	1	1
GO:0006576	cellular biogenic amine metabolic process	biological_process	1	1	1	1	1	1	1	1	1	1	1	1	1	1	1	1	1	1	1	1	1	1	1	1	1	1	1	1	1	1	1	1	1	1	1	1	1	1	1	1	1	1	1	1	1	1	1
GO:0006584	catecholamine metabolic process	biological_process	1	1	1	1	1	1	1	1	1	1	1	1	1	1	1	1	1	1	1	1	1	1	1	1	1	1	1	1	1	1	1	1	1	1	1	1	1	1	1	1	1	1	1	1	1	1	1
GO:0006586	indolalkylamine metabolic process	biological_process	1	1	1	1	1	1	1	1	1	1	1	1	1	1	1	1	1	1	1	1	1	1	1	1	1	1	1	1	1	1	1	1	1	1	1	1	1	1	1	1	1	1	1	1	1	1	1
GO:0006605	protein targeting	biological_process	0.00573571	1	1	1	1	1	1	1	1	1	1	1	1	1	1	1	1	1	1	1	1	1	1	1	1	1	1	1	1	1	1	1	1	1	1	1	1	1	1	1	1	1	1	1	1	1	1
GO:0006606	protein import into nucleus	biological_process	1	1	1	1	1	1	1	1	1	1	1	1	1	1	1	1	1	1	1	1	1	1	1	1	1	1	1	1	1	1	1	1	1	1	1	1	1	1	1	1	1	1	1	1	1	1	1
GO:0006612	protein targeting to membrane	biological_process	1	1	1	1	1	1	1	1	1	1	1	1	1	1	1	1	1	1	1	1	1	1	1	1	1	1	1	1	1	1	1	1	1	1	1	1	1	1	1	1	1	1	1	1	1	1	1
GO:0006613	cotranslational protein targeting to membrane	biological_process	1	1	1	1	1	1	1	1	1	1	1	1	1	1	1	1	1	1	1	1	1	1	1	1	1	1	1	1	1	1	1	1	1	1	1	1	1	1	1	1	1	1	1	1	1	1	1
GO:0006614	SRP-dependent cotranslational protein targeting to membrane	biological_process	1	1	1	1	1	1	1	1	1	1	1	1	1	1	1	1	1	1	1	1	1	1	1	1	1	1	1	1	1	1	1	1	1	1	1	1	1	1	1	1	1	1	1	1	1	1	1
GO:0006626	protein targeting to mitochondrion	biological_process	1	1	1	1	1	1	1	1	1	1	1	1	1	1	1	1	1	1	1	1	1	1	1	1	1	1	1	1	1	1	1	1	1	1	1	1	1	1	1	1	1	1	1	1	1	1	1
GO:0006629	lipid metabolic process	biological_process	1	1	1	1	1	1	1	1	1	1	0.00949984	1	1	1	1	1	1	1	1	1	1	1	1	1	1	1	1	1	1	1	1	1	1	1	1	1	1	1	1	1	1	1	1	1	1	1	1
GO:0006631	fatty acid metabolic process	biological_process	1	1	1	1	1	1	1	1	1	1	1	1	1	1	1	1	1	1	1	1	1	1	1	1	1	1	1	1	1	1	1	1	1	1	1	1	1	1	1	1	1	1	1	1	1	1	1
GO:0006633	fatty acid biosynthetic process	biological_process	1	1	1	1	1	1	1	1	1	1	1	1	1	1	1	1	1	1	1	1	1	1	1	1	1	1	1	1	1	1	1	1	1	1	1	1	1	1	1	1	1	1	1	1	1	1	1
GO:0006635	fatty acid beta-oxidation	biological_process	1	1	1	1	1	1	1	1	1	1	1	1	1	1	1	1	1	1	1	1	1	1	1	1	1	1	1	1	1	1	1	1	1	1	1	1	1	1	1	1	1	1	1	1	1	1	1
GO:0006636	unsaturated fatty acid biosynthetic process	biological_process	1	1	1	1	1	1	1	1	1	1	1	1	1	1	1	1	1	1	1	1	1	1	1	1	1	1	1	1	1	1	1	1	1	1	1	1	1	1	1	1	1	1	1	1	1	1	1
GO:0006637	acyl-CoA metabolic process	biological_process	1	1	1	1	1	1	1	1	1	1	1	1	1	1	1	1	1	1	1	1	1	1	1	1	1	1	1	1	1	1	1	1	1	1	1	1	1	1	1	1	1	1	1	1	1	1	1
GO:0006643	membrane lipid metabolic process	biological_process	1	1	1	1	1	1	1	1	1	1	1	1	1	1	1	1	1	1	1	1	1	1	1	1	1	1	1	1	1	1	1	1	1	1	1	1	1	1	1	1	1	1	1	1	1	1	1
GO:0006644	phospholipid metabolic process	biological_process	1	0.00553094	1	1	1	1	1	1	1	1	1	1	1	1	1	1	1	1	1	1	1	1	1	1	1	1	1	1	1	1	1	1	0.0031904	1	1	1	1	1	1	1	1	1	1	1	1	1	1
GO:0006650	glycerophospholipid metabolic process	biological_process	1	0.0031104	1	1	1	1	1	1	1	1	1	1	1	1	1	1	1	1	1	1	1	1	1	1	1	1	1	1	1	1	1	1	0.0008384	1	1	1	1	1	1	1	1	1	1	1	1	1	1
GO:0006662	glycerol ether metabolic process	biological_process	1	1	1	1	1	1	1	1	1	1	0.00096	1	1	1	1	1	1	1	1	1	1	1	1	1	1	1	1	1	1	1	1	1	1	1	1	1	1	1	1	1	1	1	1	1	1	1	1
GO:0006665	sphingolipid metabolic process	biological_process	1	1	1	1	1	1	1	1	1	1	1	1	1	1	1	1	1	1	1	1	1	1	1	1	1	1	1	1	1	1	1	1	1	1	1	1	1	1	1	1	1	1	1	1	1	1	1
GO:0006672	ceramide metabolic process	biological_process	1	1	1	1	1	1	1	1	1	1	1	1	1	1	1	1	1	1	1	1	1	1	1	1	1	1	1	1	1	1	1	1	1	1	1	1	1	1	1	1	1	1	1	1	1	1	1
GO:0006684	sphingomyelin metabolic process	biological_process	1	1	1	1	1	1	1	1	1	1	1	1	1	1	1	1	1	1	1	1	1	1	1	1	1	1	1	1	1	1	1	1	1	1	1	1	1	1	1	1	1	1	1	1	1	1	1
GO:0006686	sphingomyelin biosynthetic process	biological_process	1	1	1	1	1	1	1	1	1	1	1	1	1	1	1	1	1	1	1	1	1	1	1	1	1	1	1	1	1	1	1	1	1	1	1	1	1	1	1	1	1	1	1	1	1	1	1
GO:0006694	steroid biosynthetic process	biological_process	1	1	1	1	1	1	1	1	1	1	1	1	1	1	1	1	1	1	1	1	1	1	1	1	1	1	1	1	1	1	1	1	1	1	1	1	1	1	1	1	1	1	1	1	1	1	1
GO:0006720	isoprenoid metabolic process	biological_process	1	1	1	1	1	1	1	1	1	1	1	1	1	1	1	1	1	1	1	1	1	1	1	1	1	1	1	1	1	1	1	1	1	1	1	1	1	1	1	1	1	1	1	1	1	1	1
GO:0006725	cellular aromatic compound metabolic process	biological_process	1	1	1	1	1	1	1	1	1	1	1	1	1	1	1	1	1	1	1	1	1	1	1	1	1	1	1	1	1	1	1	1	1	1	1	1	1	1	1	1	0.00029952	1	1	1	1	1	1
GO:0006730	one-carbon metabolic process	biological_process	1	1	0.0022144	1	1	1	1	1	1	1	1	1	1	1	1	1	1	1	1	1	1	1	1	1	1	1	1	1	1	1	1	1	1	1	1	1	1	1	1	1	1	1	1	1	1	1	1
GO:0006732	coenzyme metabolic process	biological_process	0.0007296	0.0003648	1	1	1	1	1	1	1	1	1	1	1	1	1	1	1	1	1	1	1	1	1	1	1	1	1	1	1	1	1	1	1	1	1	1	1	1	1	1	1	1	1	1	1	1	1
GO:0006733	oxidoreduction coenzyme metabolic process	biological_process	1	1	1	1	1	1	1	1	1	1	1	1	1	1	1	1	1	1	1	1	1	1	1	1	1	1	1	1	1	1	1	1	1	1	1	1	1	1	1	1	1	1	1	1	1	1	1
GO:0006739	NADP metabolic process	biological_process	1	1	1	1	1	1	1	1	1	1	1	1	1	1	1	1	1	1	1	1	1	1	1	1	1	1	1	1	1	1	1	1	1	1	1	1	1	1	1	1	1	1	1	1	1	1	1
GO:0006740	NADPH regeneration	biological_process	1	1	1	1	1	1	1	1	1	1	1	1	1	1	1	1	1	1	1	1	1	1	1	1	1	1	1	1	1	1	1	1	1	1	1	1	1	1	1	1	1	1	1	1	1	1	1
GO:0006743	ubiquinone metabolic process	biological_process	1	1	1	1	1	1	1	1	1	1	1	1	1	1	1	1	1	1	1	1	1	1	1	1	1	1	1	1	1	1	1	1	1	1	1	1	1	1	1	1	1	1	1	1	1	1	1
GO:0006744	ubiquinone biosynthetic process	biological_process	1	1	1	1	1	1	1	1	1	1	1	1	1	1	1	1	1	1	1	1	1	1	1	1	1	1	1	1	1	1	1	1	1	1	1	1	1	1	1	1	1	1	1	1	1	1	1
GO:0006753	nucleoside phosphate metabolic process	biological_process	1	1	1	1	1	1	1	1	1	1	1	1	1	1	1	1	1	1	1	1	1	1	1	1	1	1	0.00025824	1.152e-07	1	1	1	1	1	1	1	1	1	1	1	1	1	1	1	1	1	1	1
GO:0006754	ATP biosynthetic process	biological_process	1	1	1	1	1	1	1	1	1	1	1	1	1	1	1	1	1	1	1	1	1	1	1	1	1	1	1	1	1	1	0.0001488	1	1	1	1	1	1	1	1	1	1	1	1	1	1	1	1
GO:0006760	folic acid-containing compound metabolic process	biological_process	1	1	1	1	1	1	1	1	1	1	1	1	1	1	1	1	1	1	1	1	1	1	1	1	1	1	1	1	1	1	1	1	1	1	1	1	1	1	1	1	1	1	1	1	1	1	1
GO:0006766	vitamin metabolic process	biological_process	1	1	1	1	1	1	1	1	1	1	1	1	1	1	1	1	1	1	1	1	1	1	1	1	1	1	1	1	1	1	1	1	1	1	1	1	1	1	1	1	1	1	1	1	1	1	1
GO:0006767	water-soluble vitamin metabolic process	biological_process	1	1	1	1	1	1	1	1	1	1	1	1	1	1	1	1	1	1	1	1	1	1	1	1	1	1	1	1	1	1	1	1	1	1	1	1	1	1	1	1	1	1	1	1	1	1	1
GO:0006777	Mo-molybdopterin cofactor biosynthetic process	biological_process	1	1	1	1	1	1	1	1	1	1	1	1	1	1	1	1	1	1	1	1	1	1	1	1	1	1	1	1	1	1	1	1	1	1	1	1	1	1	1	1	1	1	1	1	1	1	1
GO:0006790	sulfur compound metabolic process	biological_process	1	1	1	1	1	1	1	1	1	1	1	1	1	1	1	1	1	1	1	1	1	1	1	1	1	1	1	1	1	1	1	1	1	1	1	1	1	1	1	1	1	1	1	1	1	1	1
GO:0006793	phosphorus metabolic process	biological_process	1	1	1	1	1	1	1	1	1	1	1	1	1	1	1	1	1	1	1	1	1	1	1	1	1	1	1	1	1	1	1	1	1	1	1	1	1	1	1	1	1	1	1	1	1	1	1
GO:0006796	phosphate-containing compound metabolic process	biological_process	1	1	1	1	1	1	1	1	1	1	1	1	1	1	1	1	1	1	1	1	1	1	1	1	1	1	1	1	1	1	1	1	1	1	1	1	1	1	1	1	1	1	1	1	1	1	1
GO:0006800	obsolete oxygen and reactive oxygen species metabolic process	biological_process	1	1	1	1	1	1	1	1	1	1	1	1	1	1	1	1	1	1	1	1	1	1	1	1	1	1	1	1	1	1	1	1	1	1	1	1	1	1	1	1	1	1	1	1	1	1	1
GO:0006801	superoxide metabolic process	biological_process	1	1	1	1	1	1	1	1	1	1	1	1	1	1	1	1	1	1	1	1	1	1	1	1	1	1	1	1	1	1	1	1	1	1	1	1	1	1	1	1	1	1	1	1	1	1	1
GO:0006807	nitrogen compound metabolic process	biological_process	0.00916854	4.544e-09	1.1456e-15	2.1216e-05	0.00734595	1	1.7632e-07	1	1	1	1	1	1	1	1	1	5.472e-08	1.1648e-06	1	1	0.0014304	1	1	1	1	1	1	1	1	1	1	9.408e-10	1	0.00979437	2.8736e-05	1.8304e-14	1.4144e-05	3.68e-05	1	1	3.424e-05	1	1	1	1	1	1
GO:0006810	transport	biological_process	0.00465539	3.1008e-08	1	1	1	1	1	1	1	1	1	1	1	1	1	1	1	1	1	1	1	1	1	1	1	1	1	7.232e-05	3.1136e-05	0.00416566	1	1	1.7344e-05	1	1	1	1	1	1	1	1	1	1	1	1	1	1
GO:0006811	ion transport	biological_process	1	1	1	1	1	1	1	1	1	1	1	1	1	1	1	1	1	1	1	1	1	1	1	1	1	1	2.032e-12	4.992e-30	4.992e-34	6.048e-22	4.672e-10	1	1	1	1	1	1	1	1	1	1	1	1	1	0.00454026	3.1744e-11	1
GO:0006812	cation transport	biological_process	1	1	1	1	1	1	1	1	1	1	1	1	1	1	1	1	1	1	1	1	1	1	1	1	1	1	0.000464	6.336e-09	9.92e-13	1.7408e-09	1.5488e-07	1	1	1	1	1	1	1	1	1	1	1	1	1	1	0.00489664	1
GO:0006813	potassium ion transport	biological_process	1	1	1	1	0.00762592	1	1	1	1	1	1	1	1	1	1	1	1	1	1	1	1	1	1	1	1	1	0.0007424	2.9664e-08	1.344e-16	7.808e-13	7.552e-05	1	1	1	1	1	1	1	1	1	1	1	1	1	1	1.8496e-06	1
GO:0006814	sodium ion transport	biological_process	1	1	1	1	1	1	1	1	1	1	1	1	1	1	1	1	1	1	1	1	1	1	1	1	1	1	1	7.584e-05	1	1	1	1	1	1	1	1	1	1	1	1	1	1	1	1	1	1	1
GO:0006816	calcium ion transport	biological_process	1	1	1	1	1	1	1	1	1	1	1	1	1	1	1	1	1	1	1	1	1	1	1	1	1	1	1	1	1	1	4.192e-06	1	1	1	1	1	1	1	1	1	1	1	1	1	1	1	1
GO:0006817	phosphate ion transport	biological_process	1	1	1	1	1	1	1	1	1	1	1	1	1	1	1	1	1	1	1	1	1	1	1	1	1	1	1	1	1	1	1	1	1	1	1	1	1	1	1	1	1	1	1	1	1	1	1
GO:0006818	hydrogen transport	biological_process	1	1	1	1	1	1	1	1	1	1	1	1	1	1	1	1	1	1	1	1	1	1	1	1	1	1	1	1	1	1	1	1	1	1	1	1	1	1	1	1	1	1	1	1	1	1	1
GO:0006820	anion transport	biological_process	1	1	1	1	1	1	1	1	1	1	1	1	1	1	1	1	1	1	1	1	1	1	1	1	1	1	1	1	1	1	1	1	1	1	1	1	1	1	1	1	1	1	1	1	1	1	1
GO:0006821	chloride transport	biological_process	1	1	1	1	1	1	1	1	1	1	1	1	1	1	1	1	1	1	1	1	1	1	1	1	1	1	1	1	1	1	1	1	1	1	1	1	1	1	1	1	1	1	1	1	1	1	1
GO:0006825	copper ion transport	biological_process	1	1	1	1	1	1	1	1	1	1	1	1	1	1	1	1	1	1	1	1	1	1	1	1	1	1	1	1	1	1	1	1	1	1	1	1	1	1	1	1	1	1	1	1	1	1	1
GO:0006826	iron ion transport	biological_process	1	1	1	1	1	1	1	1	1	1	1	1	1	1	1	1	1	1	1	1	1	1	1	1	1	1	1	1	1	1	1	1	1	1	1	1	1	1	1	1	1	1	1	1	1	1	1
GO:0006833	water transport	biological_process	1	1	1	1	1	1	1	1	1	1	1	1	1	1	1	1	1	1	1	1	1	1	1	1	1	1	1	1	1	1	1	1	1	1	1	1	1	1	1	1	1	1	1	1	1	1	1
GO:0006835	dicarboxylic acid transport	biological_process	1	1	1	1	1	1	1	1	1	1	1	1	1	1	1	1	1	1	1	1	1	1	1	1	1	1	1	1	1	1	1	1	1	1	1	1	1	1	1	1	1	1	1	1	1	1	1
GO:0006836	neurotransmitter transport	biological_process	1	1	1	1	1	1	1	1	1	1	1	1	1	1	1	1	1	1	1	1	1	1	1	1	1	1	1	1	1	1	1	1	1	1	1	1	1	1	1	1	1	1	1	1	1	1	1
GO:0006839	mitochondrial transport	biological_process	1	1	1	1	1	1	1	1	1	1	1	1	1	1	1	1	1	1	1	1	1	1	1	1	1	1	1	1	1	1	1	1	1	1	1	1	1	1	1	1	1	1	1	1	1	1	1
GO:0006865	amino acid transport	biological_process	1	1	1	1	1	1	1	1	1	1	1	1	1	1	1	1	1	1	1	1	1	1	1	1	1	1	1	1	1	1	1	1	1	1	1	1	1	1	1	1	1	1	1	1	1	1	1
GO:0006869	lipid transport	biological_process	1	1	1	1	1	1	1	1	1	1	1	1	1	1	1	1	1	1	1	1	1	1	1	1	1	1	1	1	1	1	1	1	1	1	1	1	1	1	1	1	1	1	1	1	1	1	1
GO:0006873	cellular ion homeostasis	biological_process	1	1	1	1	1	1	1	1	1	1	1	1	1	1	1	1	1	1	1	1	1	1	1	1	1	1	1	1	1	1	0.0008224	1	1	1	1	1	1	1	1	1	1	1	1	1	1	1	1
GO:0006874	cellular calcium ion homeostasis	biological_process	1	1	1	1	1	1	1	1	1	1	1	1	1	1	1	1	1	1	1	1	1	1	1	1	1	1	1	1	1	1	1	1	1	1	1	1	1	1	1	1	1	1	1	1	1	1	1
GO:0006875	cellular metal ion homeostasis	biological_process	1	1	1	1	1	1	1	1	1	1	1	1	1	1	1	1	1	1	1	1	1	1	1	1	1	1	1	1	1	1	1	1	1	1	1	1	1	1	1	1	1	1	1	1	1	1	1
GO:0006885	regulation of pH	biological_process	1	1	1	1	1	1	1	1	1	1	1	1	1	1	1	1	1	1	1	1	1	1	1	1	1	1	1	1	1	1	1	1	1	1	1	1	1	1	1	1	1	1	1	1	1	1	1
GO:0006886	intracellular protein transport	biological_process	5.44e-05	0.0026848	1	1	1	1	1	1	1	1	1	1	1	1	1	1	1	1	1	1	1	1	1	1	1	1	1	1	1	1	1	1	1	1	1	1	1	1	1	1	1	1	1	1	1	1	1
GO:0006887	exocytosis	biological_process	1	1	1	1	1	1	1	1	1	1	1	1	1	1	1	1	1	1	1	1	1	1	1	1	1	1	1	1	1	1	1	1	1	1	1	1	1	1	1	1	1	1	1	1	1	1	1
GO:0006888	ER to Golgi vesicle-mediated transport	biological_process	1	1	1	1	1	1	1	1	1	1	1	1	1	1	1	1	1	1	1	1	1	1	1	1	1	1	1	1	1	1	1	1	1	1	1	1	1	1	1	1	1	1	1	1	1	1	1
GO:0006897	endocytosis	biological_process	2.688e-05	8.032e-21	4.896e-09	1	1	1	4.256e-06	1	0.0019232	1	1	1	1	1	1	1	1	1	1	1	1	1	1	1	1	1	1	1	1	1	1	1	1.6416e-07	1	1	0.0003616	6.752e-05	1	9.856e-06	1	1	1	1	1	1	1	1
GO:0006898	receptor-mediated endocytosis	biological_process	6.24e-05	1.1616e-19	1.1136e-08	1	1	1	8.096e-07	1	0.0009312	1	1	1	1	1	1	1	1	1	1	1	1	1	1	1	1	1	1	1	1	1	1	1	1.0016e-05	1	1	6.72e-05	1.6416e-05	1	0.00026528	1	1	1	1	1	1	1	1
GO:0006904	vesicle docking involved in exocytosis	biological_process	1	1	1	1	1	1	1	1	1	1	1	1	1	1	1	1	1	1	1	1	1	1	1	1	1	1	1	1	1	1	1	1	1	1	1	1	1	1	1	1	1	1	1	1	1	1	1
GO:0006909	phagocytosis	biological_process	1	1	1	1	1	1	1	1	1	1	1	1	1	1	1	1	1	1	1	1	1	1	1	1	1	1	1	1	1	1	1	1	1	1	1	1	1	1	1	1	1	1	1	1	1	1	1
GO:0006911	phagocytosis	engulfment	biological_process	1	1	1	1	1	1	1	1	1	1	1	1	1	1	1	1	1	1	1	1	1	1	1	1	1	1	1	1	1	1	1	1	1	1	1	1	1	1	1	1	1	1	1	1	1	1
GO:0006913	nucleocytoplasmic transport	biological_process	1	1	1	1	1	1	1	1	1	1	1	1	1	1	1	1	1	1	1	1	1	1	1	1	1	1	1	1	1	1	1	1	1	1	1	1	1	1	1	1	1	1	1	1	1	1	1
GO:0006914	autophagy	biological_process	1	1	1	1	1	1	1	1	1	1	1	1	1	1	1	1	1	1	1	1	1	1	1	1	1	1	1	1	1	1	1	1	1	1	1	1	1	1	1	1	1	1	1	1	1	1	1
GO:0006915	apoptotic process	biological_process	0.0023904	0.000864	1	1	1	1	1	1	1	1	1	1	1	1	1	1	1	1	1	1	1	1	1	1	1	1	1	1	1	1	1	1	6.08e-05	1	1	0.002	1	1	1	1	1	1	1	1	1	1	1
GO:0006921	cellular component disassembly involved in execution phase of apoptosis	biological_process	1	1	1	1	1	1	1	1	1	1	1	1	1	1	1	1	1	1	1	1	1	1	1	1	1	1	1	1	1	1	1	1	1	1	1	0.0013792	1	1	1	1	1	1	1	1	1	1	1
GO:0006928	movement of cell or subcellular component	biological_process	1	1	1	1	1	1	1	1	0.0019616	1	1	1	1	1	0.0003776	1	1	1.0208e-06	7.232e-10	1	1	0.002624	1	1	1	1	1	1	1	1	1	1	1	1	1	1	1	1	8.512e-11	1	0.0016448	1.1712e-13	1	1	1	1	1
GO:0006935	chemotaxis	biological_process	1	1	1	1	1	1	1	1	1	1	1	1	1	1	2.7872e-06	1	1	1	1	1	1	1	1	1	1	1	1	1	1	1	1	1	1	1	1	1	1	1	5.792e-05	1	1	4.16e-05	1	0.0004352	1	1	1
GO:0006936	muscle contraction	biological_process	1	1	1	1	1	1	1	1	1	1	1	1	1	1	1	1	1	1	1	1	1	1	1	1	1	1	1	0.00496413	1	1	1	1	1	1	1	1	1	1	1	1	1	1	3.296e-05	1.8976e-06	9.856e-06	1	1
GO:0006937	regulation of muscle contraction	biological_process	1	1	1	1	1	1	1	1	1	1	1	1	1	1	1	1	1	1	1	1	1	1	1	1	1	1	1	1	1	1	1	1	1	1	1	1	1	1	1	1	1	1	1	1	1	1	1
GO:0006941	striated muscle contraction	biological_process	1	1	1	1	1	1	1	1	1	1	1	1	1	1	1	1	1	1	1	1	1	1	1	1	1	1	1	1	1	1	1	1	1	1	1	1	1	1	1	1	1	1	0.00015008	1	1	1	1
GO:0006949	syncytium formation	biological_process	1	1	1	1	1	1	1	1	1	1	1	1	1	1	1	1	1	1	1	1	1	1	1	1	1	1	1	1	1	1	1	1	1	1	1	1	1	1	1	1	1	1	1	1	1	1	1
GO:0006950	response to stress	biological_process	0.0017824	9.312e-12	0.00024352	1	1	1	1	1	1	1	1	1	1	1	1	1	1	1	1	1	1	1	1	1	1	1	1	1	1	1	1	1	1.6224e-05	1	1	1	1	1	1	1	1	1	1	1	1	1	1
GO:0006952	defense response	biological_process	1	1	1	1	1	1	1	1	1	1	1	1	1	1	1	1	1	1	1	1	1	1	1	1	1	1	1	1	1	1	1	1	1	1	1	1	1	1	1	1	1	1	1	1	1	1	1
GO:0006955	immune response	biological_process	1	1	1	1	1	1	1	1	1	1	1	1	1	1	1	1	1	1	1	1	1	1	1	1	1	1	1	1	1	1	1	1	1	1	1	1	1	1	1	1	1	1	1	1	1	1	1
GO:0006970	response to osmotic stress	biological_process	1	1	1	1	1	1	1	1	1	1	1	1	1	1	1	1	1	1	1	1	1	1	1	1	1	1	1	1	0.00667466	1	1	1	1	1	1	1	1	1	1	1	1	1	1	1	1	1	1
GO:0006972	hyperosmotic response	biological_process	1	1	1	1	1	1	1	1	1	1	1	1	1	1	1	1	1	1	1	1	1	1	1	1	1	1	1	1	1	1	1	1	1	1	1	1	1	1	1	1	1	1	1	1	1	1	1
GO:0006974	cellular response to DNA damage stimulus	biological_process	3.424e-06	1.8784e-19	2.5536e-08	1	1	1	1	1	1	1	1	1	1	1	1	1	1	1	1	1	1	1	1	1	1	1	1	1	1	1	1	1	9.728e-06	1	1	2.0992e-06	0.0010816	1	1	1	1	1	1	1	1	1	1
GO:0006979	response to oxidative stress	biological_process	1	1	1	1	1	1	1	1	1	1	1	1	1	1	1	1	1	1	1	1	1	1	1	1	1	1	1	1	1	1	1	1	1	1	1	1	1	1	1	1	1	1	1	1	1	1	1
GO:0006984	ER-nucleus signaling pathway	biological_process	1	1	1	1	1	1	1	1	1	1	1	1	1	1	1	1	1	1	1	1	1	1	1	1	1	1	1	1	1	1	1	1	1	1	1	1	1	1	1	1	1	1	1	1	1	1	1
GO:0006986	response to unfolded protein	biological_process	1	1	1	1	1	1	1	1	1	1	1	1	1	1	1	1	1	1	1	1	1	1	1	1	1	1	1	1	1	1	1	1	1	1	1	1	1	1	1	1	1	1	1	1	1	1	1
GO:0006996	organelle organization	biological_process	2.8608e-05	1.3728e-10	6.336e-08	1	1	0.00025088	2.6336e-18	2.992e-11	0.0012992	4.032e-08	1	1	1	1	1	1	1	8.096e-15	0.0005024	1	1	1	1	1	1	1	1	1	1	1	1	3.264e-06	3.648e-08	1	1	8e-31	4.128e-57	2.4768e-43	7.68e-06	8.768e-09	1.0144e-09	0.00482176	1	1	1	1	1
GO:0006997	nucleus organization	biological_process	1	1	1	1	1	1	1	1	1	1	1	1	1	1	1	1	1	1	1	1	1	1	1	1	1	1	1	1	1	1	1	1	1	1	1	0.00011456	1.9552e-05	0.00023552	1	1	1	1	1	1	1	1	1
GO:0006998	nuclear envelope organization	biological_process	1	1	1	1	1	1	1	1	1	1	1	1	1	1	1	1	1	1	1	1	1	1	1	1	1	1	1	1	1	1	1	1	1	1	1	1	1	1	1	1	1	1	1	1	1	1	1
GO:0007005	mitochondrion organization	biological_process	1	1	1	1	1	1	1	1	1	1	1	1	1	1	1	1	1	1	1	1	1	1	1	1	1	1	1	1	1	1	1	1	1	1	1	1	1	1	1	1	1	1	1	1	1	1	1
GO:0007006	mitochondrial membrane organization	biological_process	1	1	1	1	1	1	1	1	1	1	1	1	1	1	1	1	1	1	1	1	1	1	1	1	1	1	1	1	1	1	1	1	1	1	1	1	1	1	1	1	1	1	1	1	1	1	1
GO:0007007	inner mitochondrial membrane organization	biological_process	1	1	1	1	1	1	1	1	1	1	1	1	1	1	1	1	1	1	1	1	1	1	1	1	1	1	1	1	1	1	1	1	1	1	1	1	1	1	1	1	1	1	1	1	1	1	1
GO:0007010	cytoskeleton organization	biological_process	1	0.00013152	1	1	1	1	0.00866979	1	1	1	1	1	1	1	1	1	1	1	1	1	1	1	1	1	1	1	1	1	1	1	1	1	0.000464	1	1	1.824e-10	7.328e-08	1	6.272e-05	1	1	4.992e-06	1.8944e-06	3.072e-06	1	1	1
GO:0007015	actin filament organization	biological_process	1	1	1	1	1	1	1	1	1	1	1	1	1	1	1	1	1	1	1	1	1	1	1	1	1	1	1	1	1	1	1	1	1	1	1	1	1	1	1	1	1	1	1	1	1	1	1
GO:0007017	microtubule-based process	biological_process	1	1.3632e-05	4.192e-06	1	1	1	0.00659731	1	1	1	1	1	1	1	1	1	1	1	1	1	1	1	1	1	1	1	1	1	1	1	1	1	1	1	1	3.264e-16	1.456e-15	4.448e-06	1	1	1	1	1	1	1	1	1
GO:0007018	microtubule-based movement	biological_process	1	1	1	1	1	1	1	1	1	1	1	1	1	1	1	1	1	1	1	1	1	1	1	1	1	1	1	1	1	1	1	1	1	1	1	1	1	1	1	1	1	1	1	1	1	1	1
GO:0007019	microtubule depolymerization	biological_process	1	1	1	1	1	1	1	1	1	1	1	1	1	1	1	1	1	1	1	1	1	1	1	1	1	1	1	1	1	1	1	1	1	1	1	1	1	1	1	1	1	1	1	1	1	1	1
GO:0007020	microtubule nucleation	biological_process	1	1	1	1	1	1	1	1	1	1	1	1	1	1	1	1	1	1	1	1	1	1	1	1	1	1	1	1	1	1	1	1	1	1	1	0.0063993	1	1	1	1	1	1	1	1	1	1	1
GO:0007026	negative regulation of microtubule depolymerization	biological_process	1	1	1	1	1	1	1	1	1	1	1	1	1	1	1	1	1	1	1	1	1	1	1	1	1	1	1	1	1	1	1	1	1	1	1	1	1	1	1	1	1	1	1	1	1	1	1
GO:0007031	peroxisome organization	biological_process	1	1	1	1	1	1	1	1	1	1	1	1	1	1	1	1	1	0.00512022	1	1	1	1	1	1	1	1	1	1	1	1	1	1	1	1	1	1	1	1	1	1	0.0004256	1	1	1	1	1	1
GO:0007033	vacuole organization	biological_process	1	1	1	1	1	1	1	1	1	1	1	1	1	1	1	1	1	1	1	1	1	1	1	1	1	1	1	1	1	1	1	1	1	1	1	1	1	1	1	1	1	1	1	1	1	1	1
GO:0007034	vacuolar transport	biological_process	1	1	1	1	1	1	1	1	1	1	1	1	1	1	1	1	1	1	1	1	1	1	1	1	1	1	1	1	1	1	1	1	1	1	1	1	1	1	1	1	1	1	1	1	1	1	1
GO:0007040	lysosome organization	biological_process	1	1	1	1	1	1	1	1	1	1	1	1	1	1	1	1	1	1	1	1	1	1	1	1	1	1	1	1	1	1	1	1	1	1	1	1	1	1	1	1	1	1	1	1	1	1	1
GO:0007049	cell cycle	biological_process	1.0112e-15	9.504e-24	1.1936e-16	0.00326224	1	8.512e-06	4.256e-10	1	0.00018304	1	1	1	1	1	1	1	1	1	1	1	1	1	1	1	1	1	1	1	1	1	1	1	2.9088e-17	0.0001328	1	8.288e-36	1.6416e-33	7.616e-13	0.0017376	1	1	1	1	1	1	1	1
GO:0007050	cell cycle arrest	biological_process	1	1	1	1	1	1	1	1	1	1	1	1	1	1	1	1	1	1	1	1	1	1	1	1	1	1	1	1	1	1	1	1	1	1	1	6.432e-05	1	1	1	1	1	1	1	1	1	1	1
GO:0007051	spindle organization	biological_process	1	1	0.00022176	1	1	1	8.224e-06	1	0.0006944	1	1	1	1	1	1	1	1	1	1	1	1	1	1	1	1	1	1	1	1	1	1	1	1	1	1	9.888e-15	5.408e-15	2.7104e-06	1	1	1	1	1	1	1	1	1
GO:0007052	mitotic spindle organization	biological_process	1	1	0.0018528	1	1	1	2.016e-06	1	0.0003424	1	1	1	1	1	1	1	1	1	1	1	1	1	1	1	1	1	1	1	1	1	1	1	1	1	1	7.456e-14	2.16e-12	5.824e-05	1	1	1	1	1	1	1	1	1
GO:0007059	chromosome segregation	biological_process	4.256e-09	9.408e-14	2.5344e-06	1	1	1.1744e-06	0.00011328	1	1	1	1	1	1	1	1	1	1	1	1	1	1	1	1	1	1	1	1	1	1	1	1	1	5.984e-07	0.0007744	1	8.416e-18	3.712e-21	1.4752e-07	1	1	1	1	1	1	1	1	1
GO:0007062	sister chromatid cohesion	biological_process	1	1	1	1	1	1	1	1	1	1	1	1	1	1	1	1	1	1	1	1	1	1	1	1	1	1	1	1	1	1	1	1	1	1	1	1	1	1	1	1	1	1	1	1	1	1	1
GO:0007067	mitotic nuclear division	biological_process	1	1	1	1	1	5.312e-06	4.512e-07	1	1	1	1	1	1	1	1	1	1	1	1	1	1	1	1	1	1	1	1	1	1	1	1	1	1	1	1	1.5456e-11	7.008e-19	1.2224e-07	0.00446352	1	1	1	1	1	1	1	1
GO:0007088	regulation of mitotic nuclear division	biological_process	1	1	1	1	1	1	0.0011072	1	1	1	1	1	1	1	1	1	1	1	1	1	1	1	1	1	1	1	1	1	1	1	1	1	1	1	1	0.00024064	0.0007872	0.0007392	1	1	1	1	1	1	1	1	1
GO:0007091	metaphase/anaphase transition of mitotic cell cycle	biological_process	1	1	1	1	1	1	0.00411101	1	1	1	1	1	1	1	1	1	1	1	1	1	1	1	1	1	1	1	1	1	1	1	1	1	1	1	1	0.0013792	0.00010176	9.408e-05	1	1	1	1	1	1	1	1	1
GO:0007093	mitotic cell cycle checkpoint	biological_process	1	1	1	1	1	1	0.00784384	1	1	1	1	1	1	1	1	1	1	1	1	1	1	1	1	1	1	1	1	1	1	1	1	1	1	1	1	1.2576e-05	9.888e-05	0.0057943	1	1	1	1	1	1	1	1	1
GO:0007097	nuclear migration	biological_process	1	1	2.7936e-05	1	1	1	1	1	1	1	1	1	1	1	1	1	1	1	1	1	1	1	1	1	1	1	1	1	1	1	1	1	1	1	1	1	1	1	1	1	1	1	1	1	1	1	1
GO:0007098	centrosome cycle	biological_process	1	1	1	1	1	1	1	1	1	1	1	1	1	1	1	1	1	1	1	1	1	1	1	1	1	1	1	1	1	1	1	1	1	1	1	1	0.0012928	1	1	1	1	1	1	1	1	1	1
GO:0007126	meiotic nuclear division	biological_process	8.096e-11	5.888e-15	8.672e-10	1	1	0.00894102	0.00619248	1	1	1	1	1	1	1	1	1	1	1	1	1	1	1	1	1	1	1	1	1	1	1	1	1	5.824e-10	0.00027904	1	2.1696e-11	5.312e-13	1.8176e-06	1	1	1	1	1	1	1	1	1
GO:0007127	meiosis I	biological_process	0.0018976	1.0176e-05	1	1	1	1	1	1	1	1	1	1	1	1	1	1	1	1	1	1	1	1	1	1	1	1	1	1	1	1	1	1	0.00567245	1	1	1	1	1	1	1	1	1	1	1	1	1	1
GO:0007129	synapsis	biological_process	0.00409254	2.0928e-05	1	1	1	1	1	1	1	1	1	1	1	1	1	1	1	1	1	1	1	1	1	1	1	1	1	1	1	1	1	1	9.312e-05	1	1	1	1	1	1	1	1	1	1	1	1	1	1
GO:0007130	synaptonemal complex assembly	biological_process	1	1	1	1	1	1	1	1	1	1	1	1	1	1	1	1	1	1	1	1	1	1	1	1	1	1	1	1	1	1	1	1	1	1	1	1	1	1	1	1	1	1	1	1	1	1	1
GO:0007131	reciprocal meiotic recombination	biological_process	0.00676931	0.00435523	1	1	1	1	1	1	1	1	1	1	1	1	1	1	1	1	1	1	1	1	1	1	1	1	1	1	1	1	1	1	1	1	1	1	1	1	1	1	1	1	1	1	1	1	1
GO:0007135	meiosis II	biological_process	1	1	1	1	1	1	1	1	1	1	1	1	1	1	1	1	1	1	1	1	1	1	1	1	1	1	1	1	1	1	1	1	1	1	1	1	1	1	1	1	1	1	1	1	1	1	1
GO:0007143	female meiotic division	biological_process	1	1	1	1	1	1	1	1	1	1	1	1	1	1	1	1	1	1	1	1	1	1	1	1	1	1	1	1	1	1	1	1	1	1	1	1	1	0.00540656	1	1	1	1	1	1	1	1	1
GO:0007154	cell communication	biological_process	1	1	1	1	1	1	1	1	1	1	1	1	1	1	0.0010144	1	1	1	1	1	1	0.0003808	1	1	1	1	0.00025728	0.00014272	1	1	1	1	1	1	1	1	1	1	0.001808	1	1	0.00622995	0.0022176	1.0784e-05	1	0.00014336	1
GO:0007155	cell adhesion	biological_process	1	1	1	1	1	1	1	1	1	1	1	1	1	1	9.024e-12	1	1	1	0.0004416	1	0.00358947	4.704e-09	6.016e-06	7.392e-05	5.024e-05	1	1	1	1	1	1	1	1	1	1	1	1	1	2.5792e-13	8.8e-09	1	4.128e-17	1.68e-13	3.328e-12	1	1	1
GO:0007156	homophilic cell adhesion via plasma membrane adhesion molecules	biological_process	1	1	1	1	1	1	1	1	1	1	1	1	1	1	1.216e-09	1	1	1	1	1	1	1	1	0.00369629	0.0029984	1	1	1	1	1	1	1	1	1	1	1	1	1	1.2832e-06	1.2288e-05	1	1	1	1.104e-06	1	1	1
GO:0007160	cell-matrix adhesion	biological_process	1	1	1	1	1	1	1	1	1	1	1	1	1	1	2.6144e-07	1	1	1	1	1	1	1	1	1	0.00963914	1	1	1	1	1	1	1	1	1	1	1	1	1	0.0012512	0.0064527	1	1.952e-05	0.0006112	0.0031712	1	1	1
GO:0007163	establishment or maintenance of cell polarity	biological_process	1	0.0017312	0.00760541	1	1	1	1	1	1	1	1	1	1	1	1	1	1	1	1	1	1	1	1	1	1	1	1	1	1	1	1	1	0.00672125	1	1	1	1	1	0.0021568	1	1	1	1	1	1	1	1
GO:0007165	signal transduction	biological_process	1	1	1	1	1	1	1	1	1	1	1	1	1	5.152e-05	1.3024e-07	1	1	1	0.001856	1	1	1	1	1	0.0015712	1	0.00325171	1	1	1	1	1	1	1	1	1	1	1	0.0005344	1	1	1	5.536e-05	5.792e-08	0.00014016	1	1
GO:0007166	cell surface receptor signaling pathway	biological_process	1	1	1	1	1	1	1	1	1	1	1	1	1	1	1	1	1	1	1	1	1	1	1	1	1	1	8.16e-07	1.8624e-10	2.992e-22	1.5968e-17	0.00904547	1	1	1	1	1	1	1	1	1	1	1	1	1	1	2.2112e-07	1
GO:0007167	enzyme linked receptor protein signaling pathway	biological_process	1	1	1	1	1	1	1	1	1	1	1	1	1	1	1	1	1	1	1	1	1	1	1	1	1	1	0.002176	1	1	1	1	1	1	1	1	1	1	1	1	1	1	1	1	6.592e-05	0.00745741	1	1
GO:0007169	transmembrane receptor protein tyrosine kinase signaling pathway	biological_process	1	1	1	1	1	1	1	1	1	1	1	1	1	1	1	1	1	1	1	1	1	0.0021184	1	1	1	1	1	1	1	1	1	1	1	1	1	1	1	1	1	1	1	1	1	0.000368	1	1	1
GO:0007173	epidermal growth factor receptor signaling pathway	biological_process	1	1	1	1	1	1	1	1	1	1	1	1	1	1	1	1	1	1	1	1	1	1	1	1	1	1	1	1	1	1	1	1	1	1	1	1	1	1	1	1	1	1	1	1	1	1	1
GO:0007178	transmembrane receptor protein serine/threonine kinase signaling pathway	biological_process	1	1	1	1	1	1	1	1	1	1	1	1	1	1	1	1	1	1	1	1	1	1	1	1	1	1	1	1	1	1	1	1	1	1	1	1	1	1	1	1	1	1	1	1	1	1	1
GO:0007179	transforming growth factor beta receptor signaling pathway	biological_process	1	1	1	1	1	1	1	1	1	1	1	1	1	1	1	1	1	1	1	1	1	1	1	1	1	1	1	1	1	1	1	1	1	1	1	1	1	1	1	1	1	1	1	1	1	1	1
GO:0007186	G-protein coupled receptor signaling pathway	biological_process	1	1	1	1	1	1	1	1	1	1	1	1	1	1	1	1	1	1	1	1	1	1	1	1	1	1	0.00022816	1.9296e-11	7.136e-32	6.496e-27	1	1	1	1	1	1	1	1	1	1	1	1	1	1	1	1.0112e-08	1
GO:0007187	G-protein coupled receptor signaling pathway	coupled to cyclic nucleotide second messenger	biological_process	1	1	1	1	1	1	1	1	1	1	1	1	1	1	1	1	1	1	1	1	1	1	1	1	1	1	1	1	1	1	1	1	1	1	1	1	1	1	1	1	1	1	1	1	1	1
GO:0007188	adenylate cyclase-modulating G-protein coupled receptor signaling pathway	biological_process	1	1	1	1	1	1	1	1	1	1	1	1	1	1	1	1	1	1	1	1	1	1	1	1	1	1	1	1	1	1	1	1	1	1	1	1	1	1	1	1	1	1	1	1	1	1	1
GO:0007205	protein kinase C-activating G-protein coupled receptor signaling pathway	biological_process	1	1	1	1	1	1	1	1	1	1	1	1	1	1	1	1	1	1	1	1	1	1	1	1	1	1	1	1	1	1	1	1	1	1	1	1	1	1	1	1	1	1	1	1	1	1	1
GO:0007210	serotonin receptor signaling pathway	biological_process	1	1	1	1	1	1	1	1	1	1	1	1	1	1	1	1	1	1	1	1	1	1	1	1	1	1	1	1	1	1	1	1	1	1	1	1	1	1	1	1	1	1	1	1	1	1	1
GO:0007212	dopamine receptor signaling pathway	biological_process	1	1	1	1	1	1	1	1	1	1	1	1	1	1	1	1	1	1	1	1	1	1	1	1	1	1	1	1	1	1	1	1	1	1	1	1	1	1	1	1	1	1	1	1	1	1	1
GO:0007218	neuropeptide signaling pathway	biological_process	1	1	1	1	1	1	1	1	1	1	1	1	1	1	1	1	1	1	1	1	1	1	1	1	1	1	1	1	4.832e-07	6.176e-07	1	1	1	1	1	1	1	1	1	1	1	1	1	1	1	0.00543021	3.52e-05
GO:0007219	Notch signaling pathway	biological_process	1	1	1	1	1	1	1	1	1	1	1	1	1	1	1	1	1	1	1	1	1	1	1	1	1	1	1	1	1	1	1	1	1	1	1	1	1	1	1	1	1	1	1	1	1	1	1
GO:0007223	Wnt signaling pathway	calcium modulating pathway	biological_process	1	1	1	1	1	1	1	1	1	1	1	1	1	1	1	1	1	1	1	1	1	1	1	1	1	1	1	1	1	1	1	1	1	1	1	1	1	1	1	1	1	1	1	1	1	1
GO:0007254	JNK cascade	biological_process	1	1	1	1	1	1	1	1	1	1	1	1	1	1	1	1	1	1	1	1	1	1	1	1	1	1	1	1	1	1	1	1	1	1	1	1	1	1	1	1	1	1	1	1	1	1	1
GO:0007264	small GTPase mediated signal transduction	biological_process	1	1	1	1	1	1	1	1	1	1	1	1	1	1	1	1	1	0.0033119	0.00325677	1	1	1	1	1	1	1	1	1	1	1	1	1	1	1	1	1	1	1	1	1	1	1	1	1	1	1	1
GO:0007265	Ras protein signal transduction	biological_process	1	1	1	1	1	1	1	1	1	1	1	1	1	1	1	1	1	1	1	1	1	1	1	1	1	1	1	1	1	1	1	1	1	1	1	1	1	1	1	1	1	1	1	1	1	1	1
GO:0007266	Rho protein signal transduction	biological_process	1	1	1	1	1	1	1	1	1	1	1	1	1	1	1	1	1	1	1	1	1	1	1	1	1	1	1	1	1	1	1	1	1	1	1	1	1	1	1	1	1	1	1	1	1	1	1
GO:0007267	cell-cell signaling	biological_process	1	1	1	1	1	1	1	1	1	1	1	1	1	1	0.00016544	1	1	1	1	1	1	1	1	1	1	1	4.928e-06	6.944e-09	1	1	0.0009472	1	1	1	1	1	1	1	1	1	1	0.0009216	3.904e-05	1.6128e-06	1	3.808e-06	1
GO:0007268	synaptic transmission	biological_process	1	1	1	1	1	1	1	1	1	1	1	1	1	1	0.0020832	1	1	1	1	1	1	1	1	1	1	1	7.584e-05	8.32e-08	1	1	0.0014944	1	1	1	1	1	1	1	1	1	1	1	0.0007488	3.232e-06	1	4.8e-05	1
GO:0007269	neurotransmitter secretion	biological_process	1	1	1	1	1	1	1	1	1	1	1	1	1	1	1	1	1	1	1	1	1	1	1	1	1	1	1	1	1	1	1	1	1	1	1	1	1	1	1	1	1	1	1	1	1	1	1
GO:0007270	neuron-neuron synaptic transmission	biological_process	1	1	1	1	1	1	1	1	1	1	1	1	1	1	1	1	1	1	1	1	1	1	1	1	1	1	1	1	1	1	1	1	1	1	1	1	1	1	1	1	1	1	1	1	1	1	1
GO:0007271	synaptic transmission	cholinergic	biological_process	1	1	1	1	1	1	1	1	1	1	1	1	1	1	0.0008864	1	1	1	1	1	1	1	1	1	1	1	1	1	1	1	1	1	1	1	1	1	1	1	1	1	1	1	1	8.32e-07	1	1
GO:0007274	neuromuscular synaptic transmission	biological_process	1	1	1	1	1	1	1	1	1	1	1	1	1	1	1	1	1	1	1	1	1	1	1	1	1	1	1	1	1	1	1	1	1	1	1	1	1	1	1	1	1	1	1	1	1	1	1
GO:0007275	multicellular organismal development	biological_process	1.0816e-58	1.2352e-106	8.064e-59	2.4128e-05	1	0.00693523	5.632e-26	4.32e-12	0.00520128	1.216e-08	1	1	1	3.872e-07	1.7888e-06	1	1	1.616e-15	2.8288e-14	1	0.0091745	0.00844858	1	1	1	1	1	1	1	1	1	1.2224e-06	1.088e-53	1.7408e-15	8.448e-11	4.832e-50	4.704e-44	4.16e-23	7.52e-26	0.00016864	1.2704e-07	1.7952e-14	0.00020608	1	1	1	1
GO:0007276	gamete generation	biological_process	7.808e-08	1.6928e-07	3.072e-08	0.0091361	1	1	1	1	1	1	1	1	1	1	1	1	1	1	1	1	1	1	1	1	1	1	1	1	1	1	1	1	1.4624e-09	0.000688	1	1	1	1	1	1	1	1	1	1	1	1	1
GO:0007281	germ cell development	biological_process	1	1	6.624e-06	1	1	1	1	1	1	1	1	1	1	1	1	1	1	1	1	1	1	1	1	1	1	1	1	1	1	1	1	1	0.00630851	0.00565818	1	0.00011552	1	1	1	1	1	1	1	1	1	1	1
GO:0007283	spermatogenesis	biological_process	0.0006528	1	1	1	1	1	1	1	1	1	1	1	1	1	1	1	1	1	1	1	1	1	1	1	1	1	1	1	1	1	1	1	0.00012928	1	1	1	1	1	1	1	1	1	1	1	1	1	1
GO:0007286	spermatid development	biological_process	1	1	1	1	1	1	1	1	1	1	1	1	1	1	1	1	1	1	1	1	1	1	1	1	1	1	1	1	1	1	1	1	1	1	1	1	1	1	1	1	1	1	1	1	1	1	1
GO:0007292	female gamete generation	biological_process	7.136e-08	5.216e-07	1	1	1	1	1	1	1	1	1	1	1	1	1	1	1	1	1	1	1	1	1	1	1	1	1	1	1	1	1	1	2.544e-08	0.0011232	1	1	1	1	1	1	1	1	1	1	1	1	1
GO:0007338	single fertilization	biological_process	1	1	6.784e-05	1	1	1	1	1	1	1	1	1	1	1	1	1	1	1	1	1	1	1	1	1	1	1	1	1	1	1	1	1	1	1	1	1	1	1	1	1	1	1	1	1	1	1	1
GO:0007346	regulation of mitotic cell cycle	biological_process	1	1	0.00924874	1	1	1	4.16e-06	1	1	1	1	1	1	1	1	1	1	1	1	1	1	1	1	1	1	1	1	1	1	1	1	1	1	1	1	1.9136e-09	9.664e-08	0.00736845	1	1	1	1	1	1	1	1	1
GO:0007350	blastoderm segmentation	biological_process	1	1	1	1	1	1	1	1	1	1	1	1	1	1	1	1	1	1	1	1	1	1	1	1	1	1	1	1	1	1	1	1	1	1	1	1	1	1	1	1	1	1	1	1	1	1	1
GO:0007351	tripartite regional subdivision	biological_process	1	1	1	1	1	1	1	1	1	1	1	1	1	1	1	1	1	1	1	1	1	1	1	1	1	1	1	1	1	1	1	1	1	1	1	1	1	1	1	1	1	1	1	1	1	1	1
GO:0007369	gastrulation	biological_process	1	1	1	1	1	1	0.0017856	1	1	1	1	1	1	1	1	1	1	1	1	1	1	1	1	1	1	1	1	1	1	1	1	1	1	1	1	0.0003936	0.00424387	1	0.00408	1	1	1	1	1	1	1	1
GO:0007389	pattern specification process	biological_process	1	1	1	1	1	1	1	1	1	1	1	1	1	1	1	1	1	1	0.00732147	1	1	1	1	1	1	1	1	1	1	1	1	1	0.0023488	1	1	1	1	1	1	1	1	0.00493859	1	1	1	1	1
GO:0007399	nervous system development	biological_process	1	1	1	1	1	1	1	1	1	1	1	1	1	1	0.0003584	1	1	5.088e-08	8.064e-05	1	0.00020512	2.7648e-05	1	1	1	1	1	1	1	1	1	0.00632675	1	1	1	1	1	1	1.6864e-09	5.504e-05	1.52e-05	9.824e-18	7.648e-06	0.002976	1	1	1
GO:0007409	axonogenesis	biological_process	1	1	1	1	1	1	1	1	1	1	1	1	1	1	0.00030976	1	1	1	1	1	1	0.0005088	1	1	1	1	1	1	1	1	1	1	1	1	1	1	1	1	3.1488e-10	0.0073817	1	1.1616e-08	0.00812557	1	1	1	1
GO:0007411	axon guidance	biological_process	1	1	1	1	1	1	1	1	1	1	1	1	1	1	8.224e-07	1	1	0.00706698	1	1	1	0.00820954	1	1	1	1	1	1	1	1	1	1	1	1	1	1	1	1	2.496e-05	0.00747574	0.00461645	0.00017152	1	1	1	1	1
GO:0007413	axonal fasciculation	biological_process	1	1	1	1	1	1	1	1	1	1	1	1	1	1	1	1	1	1	1	1	1	1	1	1	1	1	1	1	1	1	1	1	1	1	1	1	1	1	1.632e-05	1	1	0.0026848	1	1	1	1	1
GO:0007416	synapse assembly	biological_process	1	1	1	1	1	1	1	1	1	1	1	1	1	1	1	1	1	1	1	1	1	1	1	1	1	1	1	1	1	1	1	1	1	1	1	1	1	1	1	1	1	1	1	1	1	1	1
GO:0007492	endoderm development	biological_process	1	1	1	1	1	1	1	1	1	1	1	1	1	1	1	1	1	1	1	1	1	1	1	1	1	1	1	1	1	1	1	1	1	1	1	1	1	1	1	1	1	1	1	1	1	1	1
GO:0007498	mesoderm development	biological_process	1	1	1	1	1	1	1	1	1	1	1	1	1	1	1	1	1	0.00570854	0.00031648	1	1	1	1	1	1	1	1	1	1	1	1	1	1	1	1	1	1	1	1	0.00682698	1	1.888e-06	1	1	1	1	1
GO:0007501	mesodermal cell fate specification	biological_process	1	1	1	1	1	1	1	1	1	1	1	1	1	1	1	1	1	1	1	1	1	1	1	1	1	1	1	1	1	1	1	1	1	1	1	1	1	1	1	1	1	1	1	1	1	1	1
GO:0007509	mesoderm migration involved in gastrulation	biological_process	1	1	1	1	1	1	1	1	1	1	1	1	1	1	1	1	1	1	5.664e-05	0.0045071	1	1	1	1	1	1	1	1	1	1	1	1	1	1	1	1	1	1	1	0.0004448	1	4.416e-07	1	1	1	1	1
GO:0007517	muscle organ development	biological_process	1	1	1	1	1	1	1	1	1	1	1	1	1	1	1	1	1	1	1	1	1	1	1	1	1	1	1	1	1	1	1	1	1	1	1	1	1	1	1	0.0029824	1	0.00018016	0.00018976	1	1	1	1
GO:0007530	sex determination	biological_process	1	1	1	1	1	1	1	1	1	1	1	1	1	1	1	1	1	1	1	1	1	1	1	1	1	1	1	1	1	1	1	1	1	1	1	1	1	1	1	1	1	1	1	1	1	1	1
GO:0007538	primary sex determination	biological_process	1	1	1	1	1	1	1	1	1	1	1	1	1	1	1	1	1	1	1	1	1	1	1	1	1	1	1	1	1	1	1	1	1	1	1	1	1	1	1	1	1	1	1	1	1	1	1
GO:0007548	sex differentiation	biological_process	1	4.224e-09	1.12e-13	0.00528874	1	4e-06	5.376e-15	0.0012096	1	1	1	1	1	1	1	1	0.0024384	0.0001104	1	1	1	1	1	1	1	1	1	1	1	1	1	1	1	1	0.0020224	2.1184e-26	3.776e-26	1.4656e-16	1.0976e-11	1	1	1	1	1	1	1	1
GO:0007549	dosage compensation	biological_process	1	1	1	1	1	1	1	1	1	1	1	1	1	1	1	1	1	1	1	1	1	1	1	1	1	1	1	1	1	1	1	7.584e-06	1	1	0.00336803	1	1	1	1	1	1	1	1	1	1	1	1
GO:0007568	aging	biological_process	1.888e-07	6.656e-12	1.184e-09	1	1	1	1	1	1	1	1	1	1	1	1	1	1	1	1	1	1	1	1	1	1	1	1	1	1	1	1	1	2.3616e-06	1	1	1	1	1	1	1	1	1	1	1	1	1	1
GO:0007586	digestion	biological_process	1	1	1	1	1	1	1	1	1	1	1	1	1	1	1	1	1	1	1	1	1	1	1	1	1	1	1	1	1	1	1	1	1	1	1	1	1	1	1	1	1	1	1	1	1	1	1
GO:0007588	excretion	biological_process	1	1	1	1	1	1	1	1	1	1	1	1	1	1	1	1	1	1	1	1	1	1	1	1	1	1	1	1	1	1	1	1	1	1	1	1	1	1	1	1	1	1	1	1	1	1	1
GO:0007592	obsolete protein-based cuticle development	biological_process	1	1	1	1	1	1	1	1	1	1	1	1	1	3.744e-06	0.0034809	1	1	1	1	1	1	1	1	1	1	1	1	1	1	1	1	1	1	1	1	1	1	1	1	0.00410192	1	4.448e-05	1	1	1	1	1
GO:0007600	sensory perception	biological_process	1	1	1	1	1	1	1	1	1	1	1	1	1	1	1	1	1	1	1	1	1	1	1	1	1	1	1	1	1	1	1	1	1	1	1	1	1	1	1	1	1	1	1	1	1	1	1
GO:0007606	sensory perception of chemical stimulus	biological_process	1	1	1	1	1	1	1	1	1	1	1	1	1	1	1	1	1	1	1	1	1	1	1	1	1	1	1	1	1	1	1	1	1	1	1	1	1	1	1	1	1	1	1	1	1	1	1
GO:0007610	behavior	biological_process	1	1	1	1	1	1	1	1	1	1	1	1	1	0.00495894	7.104e-06	1	1	3.0176e-05	1.0176e-05	1	1	0.00480938	1	9.056e-07	0.00646742	1	1	9.568e-07	1	1	1	1	1	1	1	1	1	1	0.0026656	1	1	8e-17	6.144e-12	9.312e-14	9.44e-05	0.00639277	1
GO:0007611	learning or memory	biological_process	1	1	1	1	1	1	1	1	1	1	1	1	1	1	1	1	1	1	1	1	1	1	1	1	1	1	1	1	1	1	1	1	1	1	1	1	1	1	1	1	1	1	1	1	1	1	1
GO:0007612	learning	biological_process	1	1	1	1	1	1	1	1	1	1	1	1	1	1	1	1	1	1	1	1	1	1	1	1	1	1	1	1	1	1	1	1	1	1	1	1	1	1	1	1	1	1	1	1	1	1	1
GO:0007617	mating behavior	biological_process	1	1	1	1	1	1	1	1	1	1	1	1	1	1	1	1	1	1	1	1	1	1	1	1	1	1	1	1	1	1	1	1	1	1	1	1	1	1	1	1	1	1	1	1	1	1	1
GO:0007618	mating	biological_process	1	1	1	1	1	1	1	1	1	1	1	1	1	1	1	1	1	1	1	1	1	1	1	1	1	1	1	1	1	1	1	1	1	1	1	1	1	1	1	1	1	1	1	1	1	1	1
GO:0007626	locomotory behavior	biological_process	1	1	1	1	1	1	1	1	1	1	1	1	1	1	1	1	1	1	1	1	1	1	1	1	1	1	1	0.0007872	0.003152	1	1	1	1	1	1	1	1	1	1	1	1	1	1	1	1	0.0046448	1
GO:0007631	feeding behavior	biological_process	1	1	1	1	1	1	1	1	1	1	1	1	1	1	1	1	1	1	1	1	1	1	1	1	1	1	1	0.00017632	1	1	1	1	1	1	1	1	1	1	1	1	1	1	1	3.776e-05	0.00029568	3.744e-05	1
GO:0007635	chemosensory behavior	biological_process	1	1	1	1	1	1	1	1	1	1	1	1	1	1	1	1	1	1	1	1	1	1	1	1	1	1	1	1	1	1	1	1	1	1	1	1	1	1	1	1	1	1	1	1	1	1	1
GO:0007638	mechanosensory behavior	biological_process	1	1	1	1	1	1	1	1	1	1	1	1	1	1	1	1	1	1	1	1	1	1	1	1	1	1	1	0.0017856	0.00953744	0.0020128	1	1	1	1	1	1	1	1	1	1	1	1	1	1	1	1	1
GO:0008013	beta-catenin binding	molecular_function	1	1	1	1	1	1	1	1	1	1	1	1	1	1	1	1	1	1	1	1	1	1	1	1	1	1	1	1	1	1	1	1	1	1	1	1	1	1	1	1	1	1	1	1	1	1	1
GO:0008017	microtubule binding	molecular_function	1	1	1	1	1	1	1	1	1	1	1	1	1	1	1	1	1	1	1	1	1	1	1	1	1	1	1	1	1	1	1	1	1	1	1	1	1	1	1	1	1	1	1	1	1	1	1
GO:0008021	synaptic vesicle	cellular_component	1	1	1	1	1	1	1	1	1	1	1	1	1	1	1	1	1	1	1	1	1	1	1	1	1	1	1	1	2.8224e-05	0.00030016	1	1	1	1	1	1	1	1	1	1	1	1	1	1	1	0.00390278	1
GO:0008022	protein C-terminus binding	molecular_function	1	1	1	1	1	1	1	1	1	1	1	1	1	1	1	1	1	1	1	1	1	1	1	1	1	1	1	1	1	1	1	1	1	1	1	1	1	1	1	1	1	1	1	1	1	1	1
GO:0008026	ATP-dependent helicase activity	molecular_function	1	0.0020896	1.328e-05	1	1	1	1	1	1	1	1	1	1	1	1	1	1	1	1	1	1	1	1	1	1	1	1	1	1	1	1	1	1	1	1	1	1	1	1.0464e-05	1	1	1	1	1	1	1	1
GO:0008033	tRNA processing	biological_process	1	1	1	1	1	1	1	1	1	1	1	1	1	1	1	1	1	1	1	1	1	1	1	1	1	1	1	1	1	1	1	1	1	1	1	1	1	1	1	1	1	1	1	1	1	1	1
GO:0008037	cell recognition	biological_process	1	1	1	1	1	1	1	1	1	1	1	1	1	1	1	1	1	1	1	1	1	0.00430685	1	1	1	1	1	1	1	1	1	1	1	1	1	1	1	1	7.168e-06	1	1	0.00020288	1	1	1	1	1
GO:0008038	neuron recognition	biological_process	1	1	1	1	1	1	1	1	1	1	1	1	1	1	1	1	1	1	1	1	1	0.00392554	1	1	1	1	1	1	1	1	1	1	1	1	1	1	1	1	5.92e-06	1	1	0.0001744	1	1	1	1	1
GO:0008045	motor neuron axon guidance	biological_process	1	1	1	1	1	1	1	1	1	1	1	1	1	1	1	1	1	1	1	1	1	1	1	1	1	1	1	1	1	1	1	1	1	1	1	1	1	1	1	1	1	1	1	1	1	1	1
GO:0008047	enzyme activator activity	molecular_function	1	1	1	1	1	1	1	1	1	1	1	1	1	1	1	1	1	1	1	1	1	1	1	1	1	1	1	1	1	1	1	1	1	1	1	1	1	1	1	1	1	1	1	1	1	1	1
GO:0008061	chitin binding	molecular_function	1	1	1	1	1	1	1	1	1	1	1	1	1	1	1	1	1	1	1	1	1	1	1	1	1	1	1	1	1	1	1	1	1	1	1	1	1	1	1	6.112e-05	1	1	1	1	1	1	1
GO:0008064	regulation of actin polymerization or depolymerization	biological_process	1	1	1	1	1	1	1	1	1	1	1	1	1	1	1	1	1	1	1	1	1	1	1	1	1	1	1	1	1	1	1	1	1	1	1	1	1	1	1	1	1	1	1	1	1	1	1
GO:0008066	glutamate receptor activity	molecular_function	1	1	1	1	1	1	1	1	1	1	1	1	1	1	1	1	1	1	1	1	1	1	1	1	1	1	1	3.392e-06	1	1	1	1	1	1	1	1	1	1	1	1	1	1	1	1	1	1	1
GO:0008076	voltage-gated potassium channel complex	cellular_component	1	1	1	1	0.00021504	1	1	1	1	1	1	1	1	1	1	1	1	1	1	1	1	1	1	1	1	1	1	1	0.00027328	1	1	1	1	1	1	1	1	1	1	1	1	1	1	1	1	1	1
GO:0008078	mesodermal cell migration	biological_process	1	1	1	1	1	1	1	1	1	1	1	1	1	1	1	1	1	1	5.664e-05	0.0045071	1	1	1	1	1	1	1	1	1	1	1	1	1	1	1	1	1	1	1	0.0004448	1	4.416e-07	1	1	1	1	1
GO:0008080	N-acetyltransferase activity	molecular_function	1	1	1	1	1	1	1	1	1	1	1	1	1	1	1	1	1	1	1	1	1	1	1	1	1	1	1	1	1	1	1	1	1	1	1	1	1	1	1	1	1	1	1	1	1	1	1
GO:0008081	phosphoric diester hydrolase activity	molecular_function	1	1	1	1	1	1	1	1	1	1	1	1	1	1	1	1	1	1	1	1	1	1	1	1	1	1	1	1	1	1	1	1	1	1	1	1	1	1	1	1	1	1	1	1	1	1	1
GO:0008083	growth factor activity	molecular_function	1	1	1	1	1	1	1	1	1	1	1	1	1	1	1	1	1	1	1	1	1	1	1	1	1	1	1	1	1	1	1	1	1	1	1	1	1	1	1	1	1	1	1	1	1	1	1
GO:0008092	cytoskeletal protein binding	molecular_function	1	1	1	1	1	1	1	1	1	1	1	1	1	0.00566301	5.344e-05	1	1	1	1	1	1	1	1	1	1	1	1	1	1	1	1	1	1	1	1	1	1	1	0.00531859	0.001024	1	1.872e-08	7.52e-06	9.12e-08	1	1	1
GO:0008094	DNA-dependent ATPase activity	molecular_function	1	0.00024384	1	1	1	1	1	1	1	1	1	1	1	1	1	1	1	1	1	1	1	1	1	1	1	1	1	1	1	1	1	1	1	1	1	2.4704e-05	1	1	1	1	1	1	1	1	1	1	1
GO:0008104	protein localization	biological_process	3.36e-06	2.8256e-06	1	1	1	1	1	1	1	1	1	1	1	1	0.00925731	1	1	1	0.00022496	1	1	1	1	1	1	1	1	1	1	1	1	1	6.208e-05	1	1	1	1	1	2.256e-05	1	1	1	1	1	1	1	1
GO:0008105	asymmetric protein localization	biological_process	1	1	1	1	1	1	1	1	1	1	1	1	1	1	0.00496157	1	1	1	1	1	1	1	1	1	1	1	1	1	1	1	1	1	6.976e-05	1	1	1	1	1	1	1	1	1	1	1	1	1	1
GO:0008107	galactoside 2-alpha-L-fucosyltransferase activity	molecular_function	1	1	1	1	1	1	1	1	1	1	1	1	1	1	1	1	1	1	1	1	1	1	1	1	1	1	1	1	1	1	1	1	1	1	1	1	1	1	1	1	1	1	1	1	1	1	1
GO:0008121	ubiquinol-cytochrome-c reductase activity	molecular_function	1	1	1	1	1	1	1	1	1	1	1	1	1	1	1	1	1	1	1	1	1	1	1	1	1	1	1	1	1	1	1	1	1	1	1	1	1	1	1	1	1	1	1	1	1	1	1
GO:0008134	transcription factor binding	molecular_function	1	1	1	1	1	1	1	1	1	1	1	1	1	1	1	1	1	1	1	1	1	1	1	1	1	1	1	1	1	1	1	1	1	1	1	1	1	1	1	1	1	1	0.0028608	1	1	1	1
GO:0008135	translation factor activity	RNA binding	molecular_function	1	0.00446006	1	1	1	1	1	1	1	1	1	1	1	1	1	1	1	1	1	1	1	1	1	1	1	1	1	1	1	1	1	1	1	1	1	1	1	1	1	1	1	1	1	1	1	1
GO:0008137	NADH dehydrogenase (ubiquinone) activity	molecular_function	1	1	1	1	1	1	1	1	1	1	1	1	1	1	1	1	1	1	1	1	1	1	1	1	1	1	1	1	1	1	1	1	1	1	1	1	1	1	1	1	0.0044119	1	1	1	1	1	1
GO:0008138	protein tyrosine/serine/threonine phosphatase activity	molecular_function	1	1	1	1	1	1	1	1	1	1	1	1	1	1	1	1	1	1	1	1	1	1	1	1	1	1	1	1	1	1	1	1	1	1	1	1	1	1	1	1	1	1	1	1	1	1	1
GO:0008146	sulfotransferase activity	molecular_function	1	1	1	1	1	1	1	1	1	1	1	1	1	1	1	1	1	1	1	1	1	1	1	1	1	1	1	0.0020992	3.616e-07	0.0029984	1	1	1	1	1	1	1	1	1	1	1	1	1	1	1	1	1
GO:0008150	biological_process	biological_process	2.6304e-40	1.0144e-70	2.416e-33	1	1	0.00788979	6.72e-14	1.4432e-05	0.001456	6.944e-07	0.00016192	1	1	0.00457427	2.2336e-06	1	1	7.616e-13	4.096e-08	1	9.376e-09	1.7472e-05	1	0.00394438	1	1	1	1	1	1	1	4.064e-10	1.4848e-43	0.0006496	0.0011616	1.0048e-20	1.5744e-14	5.536e-10	1.2512e-19	1	1.8784e-06	1.3056e-06	4.064e-11	0.00471187	1	1	1
GO:0008152	metabolic process	biological_process	2.1696e-09	5.76e-21	2.9344e-19	2.6816e-05	0.00812211	0.0001632	3.552e-05	1	1	1	1.104e-09	1	1	1	1	1	1.6768e-06	0.00017088	0.00598941	0.00903059	1.7056e-09	0.0006432	1	1	1	1	1	1	1	1	1	2.8672e-09	1.088e-11	1	1	0.0003424	1	4.32e-06	1	1	1.4816e-06	1	1	1	1	1	1
GO:0008154	actin polymerization or depolymerization	biological_process	1	1	1	1	1	1	1	1	1	1	1	1	1	1	1	1	1	1	1	1	1	1	1	1	1	1	1	1	1	1	1	1	1	1	1	1	1	1	1	1	1	1	1	1	1	1	1
GO:0008158	hedgehog receptor activity	molecular_function	1	1	1	1	1	1	1	1	1	1	1	1	1	1	3.424e-05	1	1	1	1	1	1	1	1	1	0.0024928	1	1	0.00339565	1	1	1	1	1	1	1	1	1	1	1	8.384e-05	1	1	1	4.288e-07	3.456e-05	1	1
GO:0008168	methyltransferase activity	molecular_function	1	1	1	1	1	1	1	1	1	1	1	1	1	1	1	1	1	1	1	1	1	1	1	1	1	1	1	1	1	1	1	1	1	1	1	1	1	1	1	1	1	1	1	1	1	1	1
GO:0008170	N-methyltransferase activity	molecular_function	1	1	1	1	1	1	1	1	1	1	1	1	1	1	1	1	1	1	1	1	1	1	1	1	1	1	1	1	1	1	1	1	1	1	1	1	1	1	1	1	1	1	1	1	1	1	1
GO:0008171	O-methyltransferase activity	molecular_function	1	1	1	1	1	1	1	1	1	1	1	1	1	1	1	1	1	1	1	1	1	1	1	1	1	1	1	1	1	1	1	1	1	1	1	1	1	1	1	1	1	1	1	1	1	1	1
GO:0008173	RNA methyltransferase activity	molecular_function	1	1	1	1	1	1	1	1	1	1	1	1	1	1	1	1	1	1	1	1	1	1	1	1	1	1	1	1	1	1	1	1	1	1	1	1	1	1	1	1	1	1	1	1	1	1	1
GO:0008175	tRNA methyltransferase activity	molecular_function	1	1	1	1	1	1	1	1	1	1	1	1	1	1	1	1	1	1	1	1	1	1	1	1	1	1	1	1	1	1	1	1	1	1	1	1	1	1	1	1	1	1	1	1	1	1	1
GO:0008176	tRNA (guanine-N7-)-methyltransferase activity	molecular_function	1	1	1	1	1	1	1	1	1	1	1	1	1	1	1	1	1	1	1	1	1	1	1	1	1	1	1	1	1	1	1	1	1	1	1	1	1	1	1	1	1	1	1	1	1	1	1
GO:0008188	neuropeptide receptor activity	molecular_function	1	1	1	1	1	1	1	1	1	1	1	1	1	1	1	1	1	1	1	1	1	1	1	1	1	1	1	1	7.2e-08	1.6832e-06	1	1	1	1	1	1	1	1	1	1	1	1	1	1	1	1	1
GO:0008194	UDP-glycosyltransferase activity	molecular_function	1	1	1	1	1	1	1	1	1	1	1	1	1	1	1	1	1	1	1	1	1	1	1	1	1	1	1	1	1	1	1	1	1	1	1	1	1	1	1	1	1	1	1	1	1	1	1
GO:0008202	steroid metabolic process	biological_process	1	1	1	1	1	1	1	1	1	1	1	1	1	1	1	1	1	1	1	1	1	1	1	1	1	1	1	1	1	1	1	1	1	1	1	1	1	1	1	1	1	1	1	1	1	1	1
GO:0008213	protein alkylation	biological_process	1	1	1	1	1	1	1	1	1	1	1	1	1	1	1	1	1	1	1	1	1	1	1	1	1	1	1	1	1	1	1	1	1	1	1	1	1	1	1	1	1	1	1	1	1	1	1
GO:0008219	cell death	biological_process	1	1	1	1	1	1	1	1	1	1	1	1	1	1	1	1	1	1	1	1	1	1	1	1	1	1	1	1	1	1	1	0.00446214	0.00010976	1	1	0.00740083	1	0.00426429	1	1	1	1	1	1	1	1	1
GO:0008227	G-protein coupled amine receptor activity	molecular_function	1	1	1	1	1	1	1	1	1	1	1	1	1	1	1	1	1	1	1	1	1	1	1	1	1	1	1	1	0.00574275	1	1	1	1	1	1	1	1	1	1	1	1	1	1	1	1	1	1
GO:0008233	peptidase activity	molecular_function	1	1	1	1	1	1	1	1	1	1	1	1	1	1	1	1	1	1	1	1	1	1	1	1	1	1	1	1	1	1	1	1	1	1	1	1	1	1	1	1	1	1	1	1	1	3.136e-05	1
GO:0008234	cysteine-type peptidase activity	molecular_function	1	1	1	1	1	1	1	1	1	1	1	1	1	1	1	1	1	1	1	1	1	1	1	1	1	1	1	1	1	1	1	1	1	1	1	1	1	1	1	1	1	1	1	1	1	1	1
GO:0008235	metalloexopeptidase activity	molecular_function	1	1	1	1	1	1	1	1	1	1	1	1	1	1	1	1	1	1	1	1	1	1	1	1	1	1	1	1	1	1	1	1	1	1	1	1	1	1	1	1	1	1	1	1	1	1	1
GO:0008236	serine-type peptidase activity	molecular_function	1	1	1	1	1	1	1	1	1	1	1	1	1	1	1	1	1	1	1	1	1	1	1	1	1	1	1	1	1	1	1	1	1	1	1	1	1	1	1	1	1	1	1	1	1	1	1
GO:0008237	metallopeptidase activity	molecular_function	1	1	1	1	1	1	1	1	1	1	1	1	1	1	1	1	1	1	1	1	1	1	1	1	1	1	1	1	1	1	1	1	1	1	1	1	1	1	1	1	1	1	1	1	1	0.0024288	1
GO:0008238	exopeptidase activity	molecular_function	1	1	1	1	1	1	1	1	1	1	1	1	1	1	1	1	1	1	1	1	1	1	1	1	1	1	1	1	1	1	1	1	1	1	1	1	1	1	1	1	1	1	1	1	1	0.0038479	1
GO:0008270	zinc ion binding	molecular_function	1	1	1	1	1	1	1	1	1	1	1	1	1	1	1	1	1	1	1	1	1	1	1	0.002896	1	1	1	1	1	1	1	1	1	1	1	1	1	1	0.0024384	1	1	0.0022272	1	1	1	1	1
GO:0008271	secondary active sulfate transmembrane transporter activity	molecular_function	1	1	1	1	1	1	1	1	1	1	1	1	1	1	1	1	1	1	1	1	1	1	1	1	1	1	1	1	1	1	1	1	1	1	1	1	1	1	1	1	1	1	1	1	1	1	1
GO:0008272	sulfate transport	biological_process	1	1	1	1	1	1	1	1	1	1	1	1	1	1	1	1	1	1	1	1	1	1	1	1	1	1	1	1	1	1	1	1	1	1	1	1	1	1	1	1	1	1	1	1	1	1	1
GO:0008276	protein methyltransferase activity	molecular_function	1	1	1	1	1	1	1	1	1	1	1	1	1	1	1	1	1	1	1	1	1	1	1	1	1	1	1	1	1	1	1	1	1	1	1	1	1	1	1	1	1	1	1	1	1	1	1
GO:0008283	cell proliferation	biological_process	1	1	0.00517354	0.00661098	0.0016512	1	1	1	1	1	1	1	1	1	1	1	1	1	1	1	1	1	1	1	1	1	1	1	1	1	1	1	1	1	1	1	1	1	1	1	1	1	1	1	1	1	1
GO:0008284	positive regulation of cell proliferation	biological_process	1	1	1	1	1	1	1	1	1	1	1	1	1	1	1	1	1	1	1	1	1	1	1	1	1	1	1	1	1	1	1	1	1	1	1	1	1	1	1	1	1	1	1	1	1	1	1
GO:0008285	negative regulation of cell proliferation	biological_process	1	1	1	1	1	1	1	1	1	1	1	1	1	1	1	1	1	1	1	1	1	1	1	1	1	1	1	1	1	1	1	1	1	1	1	1	1	1	1	1	1	1	1	1	1	1	1
GO:0008286	insulin receptor signaling pathway	biological_process	1	1	1	1	1	1	1	1	1	1	1	1	1	1	1	1	1	1	1	1	1	1	1	1	1	1	1	1	1	1	1	1	1	1	1	1	1	1	1	1	1	1	1	1	1	1	1
GO:0008287	protein serine/threonine phosphatase complex	cellular_component	1	1	1	1	1	1	1	1	1	1	1	1	1	1	1	1	1	1	1	1	1	1	1	1	1	1	1	1	1	1	1	1	1	1	1	1	1	1	1	1	1	1	1	1	1	1	1
GO:0008289	lipid binding	molecular_function	1	1	1	1	1	1	1	1	1	1	1	1	1	1	1	1	1	1	1	1	1	1	1	1	1	1	1	1	1	1	1	1	1	1	1	1	1	1	1	1	1	1	1	1	1	1	1
GO:0008291	acetylcholine metabolic process	biological_process	1	1	1	1	1	1	1	1	1	1	1	1	1	1	1	1	1	1	1	1	1	1	1	1	1	1	1	1	1	1	1	1	1	1	1	1	1	1	1	1	1	1	1	1	1	1	1
GO:0008299	isoprenoid biosynthetic process	biological_process	1	1	1	1	1	1	1	1	1	1	1	1	1	1	1	1	1	1	1	1	1	1	1	1	1	1	1	1	1	1	1	1	1	1	1	1	1	1	1	1	1	1	1	1	1	1	1
GO:0008305	integrin complex	cellular_component	1	1	1	1	1	1	1	1	1	1	1	1	1	1	1	1	1	1	1	1	1	0.00802026	1	1	1	1	1	1	1	1	1	1	1	1	1	1	1	1	1	1	1	0.0022848	1	1	1	1	1
GO:0008306	associative learning	biological_process	1	1	1	1	1	1	1	1	1	1	1	1	1	1	1	1	1	1	1	1	1	1	1	1	1	1	1	1	1	1	1	1	1	1	1	1	1	1	1	1	1	1	1	1	1	1	1
GO:0008307	structural constituent of muscle	molecular_function	1	1	1	1	1	1	1	1	1	1	1	1	1	1	1	1	1	1	1	1	1	1	1	1	1	1	1	1	1	1	1	1	1	1	1	1	1	1	1	1	1	1	1	1	0.0054841	1	1
GO:0008308	voltage-gated anion channel activity	molecular_function	1	1	1	1	1	1	1	1	1	1	1	1	1	1	1	1	1	1	1	1	1	1	1	1	1	1	1	1	1	1	1	1	1	1	1	1	1	1	1	1	1	1	1	1	1	1	1
GO:0008312	7S RNA binding	molecular_function	1	1	1	1	1	1	1	1	1	1	1	1	1	1	1	1	1	1	1	1	1	1	1	1	1	1	1	1	1	1	1	1	1	1	1	1	1	1	1	1	1	1	1	1	1	1	1
GO:0008316	structural constituent of vitelline membrane	molecular_function	1	1	1	1	1	1	1	1	1	1	1	1	1	1	1	1	1	1	1	1	1	1	1	1	1	1	1	1	1	1	1	1	1	1	1	1	1	1	1	1	1	1	1	1	1	1	1
GO:0008320	protein transmembrane transporter activity	molecular_function	1	1	1	1	1	1	1	1	1	1	1	1	1	1	1	1	1	1	1	1	1	1	1	1	1	1	1	1	1	1	1	1	1	1	1	1	1	1	1	1	1	1	1	1	1	1	1
GO:0008324	cation transmembrane transporter activity	molecular_function	1	1	1	1	1	1	1	1	1	1	1	1	1	1	1	1	1	1	1	1	1	1	1	1	1	1	1.5712e-06	1.7408e-14	1.968e-16	5.664e-11	1.5232e-06	1	1	1	1	1	1	1	1	1	1	1	1	1	1	1.3888e-08	1
GO:0008340	determination of adult lifespan	biological_process	6.368e-07	2.1856e-11	2.1344e-09	1	1	1	1	1	1	1	1	1	1	1	1	1	1	1	1	1	1	1	1	1	1	1	1	1	1	1	1	1	4.096e-06	1	1	1	1	1	1	1	1	1	1	1	1	1	1
GO:0008355	olfactory learning	biological_process	1	1	1	1	1	1	1	1	1	1	1	1	1	1	1	1	1	1	1	1	1	1	1	1	1	1	1	1	1	1	1	1	1	1	1	1	1	1	1	1	1	1	1	1	1	1	1
GO:0008356	asymmetric cell division	biological_process	0.0006528	0.0006624	1	1	1	1	1	1	1	1	1	1	1	1	1	1	1	1	1	1	1	1	1	1	1	1	1	1	1	1	1	1	1.7696e-05	1	1	1	1	1	1	1	1	1	1	1	1	1	1
GO:0008360	regulation of cell shape	biological_process	1	1	1	1	1	1	1	1	1	1	1	1	1	1	1	1	1	1	1	1	1	1	1	1	1	1	1	1	1	1	1	1	1	1	1	1	1	1	1	1	1	1	1	1	1	1	1
GO:0008361	regulation of cell size	biological_process	1	1	1	1	1	1	1	1	1	1	1	1	1	1	0.0005152	1	1	1	1	1	1	1	1	1	1	1	1	1	1	1	1	1	1	1	1	1	1	1	1	1	1	0.0012544	1	1	1	1	1
GO:0008375	acetylglucosaminyltransferase activity	molecular_function	1	1	1	1	1	1	1	1	1	1	1	1	1	1	1	1	1	1	1	1	1	1	1	1	1	1	1	1	1	1	1	1	1	1	1	1	1	1	1	1	1	1	1	1	1	1	1
GO:0008378	galactosyltransferase activity	molecular_function	1	1	1	1	1	1	1	1	1	1	1	1	1	1	1	1	1	1	1	1	1	1	1	1	1	1	1	1	1	1	1	1	1	1	1	1	1	1	1	1	1	1	1	1	1	1	1
GO:0008380	RNA splicing	biological_process	1	1	1	0.00791171	1	1	1	1	1	1	1	1	1	1	1	1	1	1	1	1	1	1	1	1	1	1	1	1	1	1	1	1	1	1	1	1	1	1	1	1	1	1	1	1	1	1	1
GO:0008406	gonad development	biological_process	1	1	1	1	1	1	1	1	1	1	1	1	1	1	1	1	1	0.00510678	1	1	1	1	1	1	1	1	1	1	1	1	1	1	1	1	1	1	1	1	0.0003552	1	1	1	1	1	1	1	1
GO:0008408	3'-5' exonuclease activity	molecular_function	1	1	1	1	1	1	1	1	1	1	1	1	1	1	1	1	1	1	1	1	1	1	1	1	1	1	1	1	1	1	1	1	1	1	1	1	1	1	1	1	1	1	1	1	1	1	1
GO:0008417	fucosyltransferase activity	molecular_function	1	1	1	1	1	1	1	1	1	1	1	1	1	1	1	1	1	1	1	1	1	1	1	1	1	1	1	1	1	1	1	1	1	1	1	1	1	1	1	1	1	1	1	1	1	1	1
GO:0008440	inositol-1	4	5-trisphosphate 3-kinase activity	molecular_function	1	1	1	1	1	1	1	1	1	1	1	1	1	1	1	1	1	1	1	1	1	1	1	1	1	1	1	1	1	1	1	1	1	1	1	1	1	1	1	1	1	1	1	1	1
GO:0008483	transaminase activity	molecular_function	1	1	1	1	1	1	1	1	1	1	1	1	1	1	1	1	1	1	1	1	1	1	1	1	1	1	1	1	1	1	1	1	1	1	1	1	1	1	1	1	1	1	1	1	1	1	1
GO:0008484	sulfuric ester hydrolase activity	molecular_function	1	1	1	1	1	1	1	1	1	1	1	1	1	1	1	1	1	1	1	1	1	1	1	1	1	1	1	1	1	1	1	1	1	1	1	1	1	1	1	1	1	1	1	1	1	1	1
GO:0008509	anion transmembrane transporter activity	molecular_function	1	1	1	1	1	1	1	1	1	1	1	1	1	1	1	1	1	1	1	1	1	1	1	1	1	1	0.0011872	1	0.0003456	9.248e-05	1	1	1	1	1	1	1	1	1	1	1	1	1	1	1	1	1
GO:0008519	ammonium transmembrane transporter activity	molecular_function	1	1	1	1	1	1	1	1	1	1	1	1	1	1	1	1	1	1	1	1	1	1	1	1	1	1	1	1	1	1	1	1	1	1	1	1	1	1	1	1	1	1	1	1	1	1	1
GO:0008528	G-protein coupled peptide receptor activity	molecular_function	1	1	1	1	1	1	1	1	1	1	1	1	1	1	1	1	1	1	1	1	1	1	1	1	1	1	1	0.00583488	5.568e-07	6.976e-07	1	1	1	1	1	1	1	1	1	1	1	1	1	1	1	1	1
GO:0008543	fibroblast growth factor receptor signaling pathway	biological_process	1	1	1	1	1	1	1	1	1	1	1	1	1	1	1	1	1	1	1	1	1	1	1	1	1	1	1	1	1	1	1	1	1	1	1	1	1	1	1	1	1	1	1	1	1	1	1
GO:0008544	epidermis development	biological_process	1	1	1	1	1	1	1	1	1	1	1	1	1	1	1	1	1	1	0.0001712	1	1	1	1	1	1	1	1	1	1	1	1	1	1	1	1	1	1	1	1	1	1	1	1	1	1	1	1
GO:0008565	protein transporter activity	molecular_function	1	1	1	1	1	1	1	1	1	1	1	1	1	1	1	1	1	1	1	1	1	1	1	1	1	1	1	1	1	1	1	1	1	1	1	1	1	1	1	1	1	1	1	1	1	1	1
GO:0008593	regulation of Notch signaling pathway	biological_process	1	1	1	1	1	1	1	1	1	1	1	1	1	1	1	1	1	1	1	1	1	1	1	1	1	1	1	1	1	1	1	1	1	1	1	1	1	1	1	1	1	1	1	1	1	1	1
GO:0008595	anterior/posterior axis specification	embryo	biological_process	1	1	1	1	1	1	1	1	1	1	1	1	1	1	1	1	1	1	1	1	1	1	1	1	1	1	1	1	1	1	1	1	1	1	1	1	1	1	1	1	1	1	1	1	1	1
GO:0008610	lipid biosynthetic process	biological_process	0.00549808	0.00981622	1	1	1	1	1	1	1	1	1	1	1	1	1	1	1	1	1	1	1	1	1	1	1	1	1	1	1	1	1	1	0.0016512	1	1	1	1	1	1	1	1	1	1	1	1	1	1
GO:0008630	intrinsic apoptotic signaling pathway in response to DNA damage	biological_process	1	0.00435523	1	1	1	1	1	1	1	1	1	1	1	1	1	1	1	1	1	1	1	1	1	1	1	1	1	1	1	1	1	1	1	1	1	1	1	1	1	1	1	1	1	1	1	1	1
GO:0008643	carbohydrate transport	biological_process	1	1	1	1	1	1	1	1	1	1	1	1	1	1	1	1	1	1	1	1	1	1	1	1	1	1	1	1	1	1	1	1	1	1	1	1	1	1	1	1	1	1	1	1	1	1	1
GO:0008652	cellular amino acid biosynthetic process	biological_process	1	1	1	1	1	1	1	1	1	1	1	1	1	1	1	1	1	1	1	1	1	1	1	1	1	1	1	1	1	1	1	1	1	1	1	1	1	1	1	1	1	1	1	1	1	1	1
GO:0008653	lipopolysaccharide metabolic process	biological_process	1	1	1	1	1	1	1	1	1	1	1	1	1	1	1	1	1	1	1	1	1	1	1	1	1	1	1	1	1	1	1	1	1	1	1	1	1	1	1	1	1	1	1	1	1	1	1
GO:0008654	phospholipid biosynthetic process	biological_process	1	1	1	1	1	1	1	1	1	1	1	1	1	1	1	1	1	1	1	1	1	1	1	1	1	1	1	1	1	1	1	1	1	1	1	1	1	1	1	1	1	1	1	1	1	1	1
GO:0008667	2	3-dihydro-2	3-dihydroxybenzoate dehydrogenase activity	molecular_function	1	1	1	1	1	1	1	1	1	1	1	1	1	1	1	1	1	1	1	1	1	1	1	1	1	1	1	1	1	1	1	1	1	1	1	1	1	1	1	1	1	1	1	1	1
GO:0008716	D-alanine-D-alanine ligase activity	molecular_function	1	1	1	1	1	1	1	1	1	1	1	1	1	1	1	1	1	1	1	1	1	1	1	1	1	1	1	1	1	1	1	1	1	1	1	1	1	1	1	1	1	1	1	1	1	1	1
GO:0008757	S-adenosylmethionine-dependent methyltransferase activity	molecular_function	1	1	1	1	1	1	1	1	1	1	1	1	1	1	1	1	1	1	1	1	1	1	1	1	1	1	1	1	1	1	1	1	1	1	1	1	1	1	1	1	1	1	1	1	1	1	1
GO:0008831	dTDP-4-dehydrorhamnose reductase activity	molecular_function	1	1	1	1	1	1	1	1	1	1	1	1	1	1	1	1	1	1	1	1	1	1	1	1	1	1	1	1	1	1	1	1	1	1	1	1	1	1	1	1	1	1	1	1	1	1	1
GO:0008889	glycerophosphodiester phosphodiesterase activity	molecular_function	1	1	1	1	1	1	1	1	1	1	1	1	1	1	1	1	1	1	1	1	1	1	1	1	1	1	1	1	1	1	1	1	1	1	1	1	1	1	1	1	1	1	1	1	1	1	1
GO:0009055	electron carrier activity	molecular_function	1	1	1	1	1	1	1	1	1	1	1	1	1	1	1	1	1	1	1	1	1	1	1	1	1	1	1	1	1	1	1	1	1	1	1	1	1	1	1	1	1	1	1	1	1	1	1
GO:0009056	catabolic process	biological_process	1.1296e-09	1.7248e-09	9.44e-06	0.00492474	0.00526429	1	1	1	1	1	1	1	1	1	1	1	1	1	1	1	1	1	1	1	1	1	1	1	1	1	1	1	8.672e-07	1	1	1	1	1	1	1	1	1	1	1	1	1	1
GO:0009057	macromolecule catabolic process	biological_process	0.0010272	1.4144e-07	4.224e-06	1	1	1	1	1	1	1	1	1	1	1	1	1	1	1	1	1	1	1	1	1	1	1	1	1	1	1	1	1	0.0022208	0.00785427	1	1	1	1	1	1	1	1	1	1	1	1	1
GO:0009058	biosynthetic process	biological_process	1	1	0.0003968	1	1	1	1	1	1	1	1	1	1	1	1	1	0.00843776	0.0018464	1	1	1.5616e-05	1	1	1	1	1	1	1	1	1	1	0.00011008	1	1	2.064e-05	3.232e-06	0.00402026	3.84e-06	1	1	9.44e-10	1	1	1	1	1	1
GO:0009059	macromolecule biosynthetic process	biological_process	1	1	1	1	1	1	0.00618784	1	1	1	1	1	1	1	1	1	0.00021632	0.00021632	0.0053239	1	1.2128e-05	1	1	1	1	1	1	1	1	1	1	0.00027392	1	1	2.4288e-07	1.3984e-07	0.00013344	1.0912e-06	1	1	1.648e-11	0.0081552	1	1	1	1	1
GO:0009060	aerobic respiration	biological_process	0.0011968	1.2896e-05	1	1	1	1	1	1	1	1	1	1	1	1	1	1	1	1	1	1	1	1	1	1	1	1	1	1	1	1	1	1	1	1	1	1	1	1	1	1	1	1	1	1	1	1	1
GO:0009062	fatty acid catabolic process	biological_process	1	1	1	1	1	1	1	1	1	1	1	1	1	1	1	1	1	1	1	1	1	1	1	1	1	1	1	1	1	1	1	1	1	1	1	1	1	1	1	1	1	1	1	1	1	1	1
GO:0009063	cellular amino acid catabolic process	biological_process	1	1	1	1	1	1	1	1	1	1	1	1	1	1	1	1	1	1	1	1	1	1	1	1	1	1	1	1	1	1	1	1	1	1	1	1	1	1	1	1	1	1	1	1	1	1	1
GO:0009064	glutamine family amino acid metabolic process	biological_process	1	1	1	1	1	1	1	1	1	1	1	1	1	1	1	1	1	1	1	1	1	1	1	1	1	1	1	1	1	1	1	1	1	1	1	1	1	1	1	1	1	1	1	1	1	1	1
GO:0009066	aspartate family amino acid metabolic process	biological_process	1	1	1	1	1	1	1	1	1	1	1	1	1	1	1	1	1	1	1	1	1	1	1	1	1	1	1	1	1	1	1	1	1	1	1	1	1	1	1	1	1	1	1	1	1	1	1
GO:0009067	aspartate family amino acid biosynthetic process	biological_process	1	1	1	1	1	1	1	1	1	1	1	1	1	1	1	1	1	1	1	1	1	1	1	1	1	1	1	1	1	1	1	1	1	1	1	1	1	1	1	1	1	1	1	1	1	1	1
GO:0009069	serine family amino acid metabolic process	biological_process	1	1	1	1	1	1	1	1	1	1	1	1	1	1	1	1	1	1	1	1	1	1	1	1	1	1	1	1	1	1	1	1	1	1	1	1	1	1	1	1	1	1	1	1	1	1	1
GO:0009070	serine family amino acid biosynthetic process	biological_process	1	1	1	1	1	1	1	1	1	1	1	1	1	1	1	1	1	1	1	1	1	1	1	1	1	1	1	1	1	1	1	1	1	1	1	1	1	1	1	1	1	1	1	1	1	1	1
GO:0009071	serine family amino acid catabolic process	biological_process	1	1	1	1	1	1	1	1	1	1	1	1	1	1	1	1	1	1	1	1	1	1	1	1	1	1	1	1	1	1	1	1	1	1	1	1	1	1	1	1	1	1	1	1	1	1	1
GO:0009072	aromatic amino acid family metabolic process	biological_process	1	1	1	1	1	1	1	1	1	1	1	1	1	1	1	1	1	1	1	1	1	1	1	1	1	1	1	1	1	1	1	1	1	1	1	1	1	1	1	1	0.00026528	1	1	1	1	1	1
GO:0009074	aromatic amino acid family catabolic process	biological_process	1	1	1	1	1	1	1	1	1	1	1	1	1	1	1	1	1	1	1	1	1	1	1	1	1	1	1	1	1	1	1	1	1	1	1	1	1	1	1	1	1	1	1	1	1	1	1
GO:0009084	glutamine family amino acid biosynthetic process	biological_process	1	1	1	1	1	1	1	1	1	1	1	1	1	1	1	1	1	1	1	1	1	1	1	1	1	1	1	1	1	1	1	1	1	1	1	1	1	1	1	1	1	1	1	1	1	1	1
GO:0009086	methionine biosynthetic process	biological_process	1	1	1	1	1	1	1	1	1	1	1	1	1	1	1	1	1	1	1	1	1	1	1	1	1	1	1	1	1	1	1	1	1	1	1	1	1	1	1	1	1	1	1	1	1	1	1
GO:0009100	glycoprotein metabolic process	biological_process	1	1	1	1	1	1	1	1	1	1	1	1	1	1	1	1	1	1	1	1	1	1	1	1	1	1	1	1	1	1	1	1	1	1	1	1	1	1	1	1	1	1	1	1	1	1	1
GO:0009101	glycoprotein biosynthetic process	biological_process	1	1	1	1	1	1	1	1	1	1	1	1	1	1	1	1	1	1	1	1	1	1	1	1	1	1	1	1	1	1	1	1	1	1	1	1	1	1	1	1	1	1	1	1	1	1	1
GO:0009103	lipopolysaccharide biosynthetic process	biological_process	1	1	1	1	1	1	1	1	1	1	1	1	1	1	1	1	1	1	1	1	1	1	1	1	1	1	1	1	1	1	1	1	1	1	1	1	1	1	1	1	1	1	1	1	1	1	1
GO:0009108	coenzyme biosynthetic process	biological_process	1	1	1	1	1	1	1	1	1	1	1	1	1	1	1	1	1	1	1	1	1	1	1	1	1	1	1	1	1	1	1	1	1	1	1	1	1	1	1	1	1	1	1	1	1	1	1
GO:0009109	coenzyme catabolic process	biological_process	0.0022144	3.968e-05	1	1	1	1	1	1	1	1	1	1	1	1	1	1	1	1	1	1	1	1	1	1	1	1	1	1	1	1	1	1	1	1	1	1	1	1	1	1	1	1	1	1	1	1	1
GO:0009110	vitamin biosynthetic process	biological_process	1	1	1	1	1	1	1	1	1	1	1	1	1	1	1	1	1	1	1	1	1	1	1	1	1	1	1	1	1	1	1	1	1	1	1	1	1	1	1	1	1	1	1	1	1	1	1
GO:0009112	nucleobase metabolic process	biological_process	1	1	1	1	1	1	1	1	1	1	1	1	1	1	1	1	1	1	1	1	1	1	1	1	1	1	1	1	1	1	1	1	1	1	1	1	1	1	1	1	1	1	1	1	1	1	1
GO:0009116	nucleoside metabolic process	biological_process	1	1	1	1	1	1	1	1	1	1	1	1	1	1	1	1	1	1	1	1	1	1	1	1	1	1	1	1	1	1	1	1	1	1	1	1	1	1	1	1	1	1	1	1	1	1	1
GO:0009117	nucleotide metabolic process	biological_process	1	1	1	1	1	1	1	1	1	1	1	1	1	1	1	1	1	1	1	1	1	1	1	1	1	1	0.00025824	1.152e-07	1	1	1	1	1	1	1	1	1	1	1	1	1	1	1	1	1	1	1
GO:0009119	ribonucleoside metabolic process	biological_process	1	1	1	1	1	1	1	1	1	1	1	1	1	1	1	1	1	1	1	1	1	1	1	1	1	1	1	1	1	1	1	1	1	1	1	1	1	1	1	1	1	1	1	1	1	1	1
GO:0009120	deoxyribonucleoside metabolic process	biological_process	1	1	1	1	1	1	1	1	1	1	1	1	1	1	1	1	1	1	1	1	1	1	1	1	1	1	1	1	1	1	1	1	1	1	1	1	1	1	1	1	1	1	1	1	1	1	1
GO:0009123	nucleoside monophosphate metabolic process	biological_process	1	1	1	1	1	1	1	1	1	1	1	1	1	1	1	1	1	1	1	1	1	1	1	1	1	1	3.232e-05	2.6112e-13	0.002576	1	1	1	1	1	1	1	1	1	1	1	1	1	1	1	1	1	1
GO:0009124	nucleoside monophosphate biosynthetic process	biological_process	1	1	1	1	1	1	1	1	1	1	1	1	1	1	1	1	1	1	1	1	1	1	1	1	1	1	2.4576e-05	1.4912e-13	0.0019072	1	1	1	1	1	1	1	1	1	1	1	1	1	1	1	1	1	1
GO:0009126	purine nucleoside monophosphate metabolic process	biological_process	1	1	1	1	1	1	1	1	1	1	1	1	1	1	1	1	1	1	1	1	1	1	1	1	1	1	1	1	1	1	1	1	1	1	1	1	1	1	1	1	1	1	1	1	1	1	1
GO:0009127	purine nucleoside monophosphate biosynthetic process	biological_process	1	1	1	1	1	1	1	1	1	1	1	1	1	1	1	1	1	1	1	1	1	1	1	1	1	1	1	1	1	1	1	1	1	1	1	1	1	1	1	1	1	1	1	1	1	1	1
GO:0009129	pyrimidine nucleoside monophosphate metabolic process	biological_process	1	1	1	1	1	1	1	1	1	1	1	1	1	1	1	1	1	1	1	1	1	1	1	1	1	1	1	1	1	1	1	1	1	1	1	1	1	1	1	1	1	1	1	1	1	1	1
GO:0009130	pyrimidine nucleoside monophosphate biosynthetic process	biological_process	1	1	1	1	1	1	1	1	1	1	1	1	1	1	1	1	1	1	1	1	1	1	1	1	1	1	1	1	1	1	1	1	1	1	1	1	1	1	1	1	1	1	1	1	1	1	1
GO:0009132	nucleoside diphosphate metabolic process	biological_process	1	1	1	1	1	1	1	1	1	1	1	1	1	1	1	1	1	1	1	1	1	1	1	1	1	1	1	1	1	1	1	1	1	1	1	1	1	1	1	1	1	1	1	1	1	1	1
GO:0009141	nucleoside triphosphate metabolic process	biological_process	1	1	1	1	1	1	1	1	1	1	1	1	1	1	1	1	1	1	1	1	1	1	1	1	1	1	1	1	1	1	1	1	0.001456	1	1	1	1	1	1	1	1	1	1	1	1	1	1
GO:0009142	nucleoside triphosphate biosynthetic process	biological_process	1	1	1	1	1	1	1	1	1	1	1	1	1	1	1	1	1	1	1	1	1	1	1	1	1	1	1	1	1	1	0.0003456	1	1	1	1	1	1	1	1	1	1	1	1	1	1	1	1
GO:0009143	nucleoside triphosphate catabolic process	biological_process	1	1	1	1	1	1	1	1	1	1	1	1	1	1	1	1	1	1	1	1	1	1	1	1	1	1	1	1	1	1	1	1	1	1	1	1	1	1	1	1	1	1	1	1	1	1	1
GO:0009144	purine nucleoside triphosphate metabolic process	biological_process	1	1	1	1	1	1	1	1	1	1	1	1	1	1	1	1	1	1	1	1	1	1	1	1	1	1	1	1	1	1	1	1	0.0012576	1	1	1	1	1	1	1	1	1	1	1	1	1	1
GO:0009145	purine nucleoside triphosphate biosynthetic process	biological_process	1	1	1	1	1	1	1	1	1	1	1	1	1	1	1	1	1	1	1	1	1	1	1	1	1	1	1	1	1	1	0.0003456	1	1	1	1	1	1	1	1	1	1	1	1	1	1	1	1
GO:0009146	purine nucleoside triphosphate catabolic process	biological_process	1	1	1	1	1	1	1	1	1	1	1	1	1	1	1	1	1	1	1	1	1	1	1	1	1	1	1	1	1	1	1	1	1	1	1	1	1	1	1	1	1	1	1	1	1	1	1
GO:0009147	pyrimidine nucleoside triphosphate metabolic process	biological_process	1	1	1	1	1	1	1	1	1	1	1	1	1	1	1	1	1	1	1	1	1	1	1	1	1	1	1	1	1	1	1	1	1	1	1	1	1	1	1	1	1	1	1	1	1	1	1
GO:0009150	purine ribonucleotide metabolic process	biological_process	1	1	1	1	1	1	1	1	1	1	1	1	1	1	1	1	1	1	1	1	1	1	1	1	1	1	1	1	1	1	1	1	0.00017984	1	1	1	1	1	1	1	1	1	1	1	1	1	1
GO:0009152	purine ribonucleotide biosynthetic process	biological_process	1	1	1	1	1	1	1	1	1	1	1	1	1	1	1	1	1	1	1	1	1	1	1	1	1	1	1	1	1	1	0.00011712	1	0.0028928	1	1	1	1	1	1	1	1	1	1	1	1	1	1
GO:0009154	purine ribonucleotide catabolic process	biological_process	1	1	1	1	1	1	1	1	1	1	1	1	1	1	1	1	1	1	1	1	1	1	1	1	1	1	1	1	1	1	1	1	1	1	1	1	1	1	1	1	1	1	1	1	1	1	1
GO:0009156	ribonucleoside monophosphate biosynthetic process	biological_process	1	1	1	1	1	1	1	1	1	1	1	1	1	1	1	1	1	1	1	1	1	1	1	1	1	1	1	1	1	1	1	1	1	1	1	1	1	1	1	1	1	1	1	1	1	1	1
GO:0009161	ribonucleoside monophosphate metabolic process	biological_process	1	1	1	1	1	1	1	1	1	1	1	1	1	1	1	1	1	1	1	1	1	1	1	1	1	1	1	1	1	1	1	1	1	1	1	1	1	1	1	1	1	1	1	1	1	1	1
GO:0009165	nucleotide biosynthetic process	biological_process	1	1	1	1	1	1	1	1	1	1	1	1	1	1	1	1	1	1	1	1	1	1	1	1	1	1	6.304e-05	1.2288e-10	1	1	4.512e-05	1	1	1	1	1	1	1	1	1	1	1	1	1	1	1	1
GO:0009166	nucleotide catabolic process	biological_process	1	1	1	1	1	1	1	1	1	1	1	1	1	1	1	1	1	1	1	1	1	1	1	1	1	1	1	1	1	1	1	1	1	1	1	1	1	1	1	1	1	1	1	1	1	1	1
GO:0009167	purine ribonucleoside monophosphate metabolic process	biological_process	1	1	1	1	1	1	1	1	1	1	1	1	1	1	1	1	1	1	1	1	1	1	1	1	1	1	1	1	1	1	1	1	1	1	1	1	1	1	1	1	1	1	1	1	1	1	1
GO:0009168	purine ribonucleoside monophosphate biosynthetic process	biological_process	1	1	1	1	1	1	1	1	1	1	1	1	1	1	1	1	1	1	1	1	1	1	1	1	1	1	1	1	1	1	1	1	1	1	1	1	1	1	1	1	1	1	1	1	1	1	1
GO:0009186	deoxyribonucleoside diphosphate metabolic process	biological_process	1	1	1	1	1	1	1	1	1	1	1	1	1	1	1	1	1	1	1	1	1	1	1	1	1	1	1	1	1	1	1	1	1	1	1	1	1	1	1	1	1	1	1	1	1	1	1
GO:0009187	cyclic nucleotide metabolic process	biological_process	1	1	1	1	1	1	1	1	1	1	1	1	1	1	1	1	1	1	1	1	1	1	1	1	1	1	1.0304e-05	4.48e-13	0.0031488	1	1	1	1	1	1	1	1	1	1	1	1	1	1	1	1	1	1
GO:0009190	cyclic nucleotide biosynthetic process	biological_process	1	1	1	1	1	1	1	1	1	1	1	1	1	1	1	1	1	1	1	1	1	1	1	1	1	1	7.136e-06	2.2016e-13	0.002192	1	1	1	1	1	1	1	1	1	1	1	1	1	1	1	1	1	1
GO:0009199	ribonucleoside triphosphate metabolic process	biological_process	1	1	1	1	1	1	1	1	1	1	1	1	1	1	1	1	1	1	1	1	1	1	1	1	1	1	1	1	1	1	1	1	0.0012576	1	1	1	1	1	1	1	1	1	1	1	1	1	1
GO:0009201	ribonucleoside triphosphate biosynthetic process	biological_process	1	1	1	1	1	1	1	1	1	1	1	1	1	1	1	1	1	1	1	1	1	1	1	1	1	1	1	1	1	1	0.0003456	1	1	1	1	1	1	1	1	1	1	1	1	1	1	1	1
GO:0009203	ribonucleoside triphosphate catabolic process	biological_process	1	1	1	1	1	1	1	1	1	1	1	1	1	1	1	1	1	1	1	1	1	1	1	1	1	1	1	1	1	1	1	1	1	1	1	1	1	1	1	1	1	1	1	1	1	1	1
GO:0009205	purine ribonucleoside triphosphate metabolic process	biological_process	1	1	1	1	1	1	1	1	1	1	1	1	1	1	1	1	1	1	1	1	1	1	1	1	1	1	1	1	1	1	1	1	0.0012576	1	1	1	1	1	1	1	1	1	1	1	1	1	1
GO:0009206	purine ribonucleoside triphosphate biosynthetic process	biological_process	1	1	1	1	1	1	1	1	1	1	1	1	1	1	1	1	1	1	1	1	1	1	1	1	1	1	1	1	1	1	0.0003456	1	1	1	1	1	1	1	1	1	1	1	1	1	1	1	1
GO:0009207	purine ribonucleoside triphosphate catabolic process	biological_process	1	1	1	1	1	1	1	1	1	1	1	1	1	1	1	1	1	1	1	1	1	1	1	1	1	1	1	1	1	1	1	1	1	1	1	1	1	1	1	1	1	1	1	1	1	1	1
GO:0009218	pyrimidine ribonucleotide metabolic process	biological_process	1	1	1	1	1	1	1	1	1	1	1	1	1	1	1	1	1	1	1	1	1	1	1	1	1	1	1	1	1	1	1	1	1	1	1	1	1	1	1	1	1	1	1	1	1	1	1
GO:0009219	pyrimidine deoxyribonucleotide metabolic process	biological_process	1	1	1	1	1	1	1	1	1	1	1	1	1	1	1	1	1	1	1	1	1	1	1	1	1	1	1	1	1	1	1	1	1	1	1	1	1	1	1	1	1	1	1	1	1	1	1
GO:0009220	pyrimidine ribonucleotide biosynthetic process	biological_process	1	1	1	1	1	1	1	1	1	1	1	1	1	1	1	1	1	1	1	1	1	1	1	1	1	1	1	1	1	1	1	1	1	1	1	1	1	1	1	1	1	1	1	1	1	1	1
GO:0009237	siderophore metabolic process	biological_process	1	1	1	1	1	1	1	1	1	1	1	1	1	1	1	1	1	1	1	1	1	1	1	1	1	1	1	1	1	1	1	1	1	1	1	1	1	1	1	1	1	1	1	1	1	1	1
GO:0009238	enterobactin metabolic process	biological_process	1	1	1	1	1	1	1	1	1	1	1	1	1	1	1	1	1	1	1	1	1	1	1	1	1	1	1	1	1	1	1	1	1	1	1	1	1	1	1	1	1	1	1	1	1	1	1
GO:0009239	enterobactin biosynthetic process	biological_process	1	1	1	1	1	1	1	1	1	1	1	1	1	1	1	1	1	1	1	1	1	1	1	1	1	1	1	1	1	1	1	1	1	1	1	1	1	1	1	1	1	1	1	1	1	1	1
GO:0009252	peptidoglycan biosynthetic process	biological_process	1	1	1	1	1	1	1	1	1	1	1	1	1	1	1	1	1	1	1	1	1	1	1	1	1	1	1	1	1	1	1	1	1	1	1	1	1	1	1	1	1	1	1	1	1	1	1
GO:0009259	ribonucleotide metabolic process	biological_process	1	1	1	1	1	1	1	1	1	1	1	1	1	1	1	1	1	1	1	1	1	1	1	1	1	1	1	1	1	1	1	1	0.0003328	1	1	1	1	1	1	1	1	1	1	1	1	1	1
GO:0009260	ribonucleotide biosynthetic process	biological_process	1	1	1	1	1	1	1	1	1	1	1	1	1	1	1	1	1	1	1	1	1	1	1	1	1	1	1	1	1	1	0.000248	1	0.00552368	1	1	1	1	1	1	1	1	1	1	1	1	1	1
GO:0009261	ribonucleotide catabolic process	biological_process	1	1	1	1	1	1	1	1	1	1	1	1	1	1	1	1	1	1	1	1	1	1	1	1	1	1	1	1	1	1	1	1	1	1	1	1	1	1	1	1	1	1	1	1	1	1	1
GO:0009262	deoxyribonucleotide metabolic process	biological_process	1	1	1	1	1	1	1	1	1	1	1	1	1	1	1	1	1	1	1	1	1	1	1	1	1	1	1	1	1	1	1	1	1	1	1	1	1	1	1	1	1	1	1	1	1	1	1
GO:0009263	deoxyribonucleotide biosynthetic process	biological_process	1	1	1	1	1	1	1	1	1	1	1	1	1	1	1	1	1	1	1	1	1	1	1	1	1	1	1	1	1	1	1	1	1	1	1	1	1	1	1	1	1	1	1	1	1	1	1
GO:0009266	response to temperature stimulus	biological_process	1	1	1	1	1	1	1	1	1	1	1	1	1	1	1	1	1	1	1	1	1	1	1	1	1	1	1	1	1	1	0.00380477	1	1	1	1	1	1	1	1	1	1	1	1	1	1	1	1
GO:0009273	peptidoglycan-based cell wall biogenesis	biological_process	1	1	1	1	1	1	1	1	1	1	1	1	1	1	1	1	1	1	1	1	1	1	1	1	1	1	1	1	1	1	1	1	1	1	1	1	1	1	1	1	1	1	1	1	1	1	1
GO:0009306	protein secretion	biological_process	1	1	1	1	1	1	1	1	1	1	1	1	1	1	1	1	1	1	1	1	1	1	1	1	1	1	1	1	1	1	1	1	1	1	1	1	1	1	1	1	1	1	1	1	1	1	1
GO:0009308	amine metabolic process	biological_process	1	1	1	1	1	1	1	1	1	1	1	1	1	1	1	1	1	1	1	1	1	1	1	1	1	1	1	1	1	1	1	1	1	1	1	1	1	1	1	1	1	1	1	1	1	1	1
GO:0009309	amine biosynthetic process	biological_process	1	1	1	1	1	1	1	1	1	1	1	1	1	1	1	1	1	1	1	1	1	1	1	1	1	1	1	1	1	1	1	1	1	1	1	1	1	1	1	1	1	1	1	1	1	1	1
GO:0009310	amine catabolic process	biological_process	1	1	1	1	1	1	1	1	1	1	1	1	1	1	1	1	1	1	1	1	1	1	1	1	1	1	1	1	1	1	1	1	1	1	1	1	1	1	1	1	1	1	1	0.0010912	1	1	1
GO:0009311	oligosaccharide metabolic process	biological_process	1	1	1	1	1	1	1	1	1	1	1	1	1	1	1	1	1	1	1	1	1	1	1	1	1	1	1	1	1	1	1	1	1	1	1	1	1	1	1	1	1	1	1	1	1	1	1
GO:0009312	oligosaccharide biosynthetic process	biological_process	1	1	1	1	1	1	1	1	1	1	1	1	1	1	1	1	1	1	1	1	1	1	1	1	1	1	1	1	1	1	1	1	1	1	1	1	1	1	1	1	1	1	1	1	1	1	1
GO:0009314	response to radiation	biological_process	1	1	1	1	1	1	1	1	1	1	1	1	1	1	1	1	1	1	1	1	1	1	1	1	1	1	1	1	1	1	1	1	1	1	1	1	1	1	1	1	1	1	1	1	1	1	1
GO:0009378	four-way junction helicase activity	molecular_function	1	0.00427005	1	1	1	1	1	1	1	1	1	1	1	1	1	1	1	1	1	1	1	1	1	1	1	1	1	1	1	1	1	1	1	1	1	1	1	1	1	1	1	1	1	1	1	1	1
GO:0009394	2'-deoxyribonucleotide metabolic process	biological_process	1	1	1	1	1	1	1	1	1	1	1	1	1	1	1	1	1	1	1	1	1	1	1	1	1	1	1	1	1	1	1	1	1	1	1	1	1	1	1	1	1	1	1	1	1	1	1
GO:0009395	phospholipid catabolic process	biological_process	1	1	1	1	1	1	1	1	1	1	1	1	1	1	1	1	1	1	1	1	1	1	1	1	1	1	1	1	1	1	1	1	1	1	1	1	1	1	1	1	1	1	1	1	1	1	1
GO:0009396	folic acid-containing compound biosynthetic process	biological_process	1	1	1	1	1	1	1	1	1	1	1	1	1	1	1	1	1	1	1	1	1	1	1	1	1	1	1	1	1	1	1	1	1	1	1	1	1	1	1	1	1	1	1	1	1	1	1
GO:0009408	response to heat	biological_process	1	1	1	1	1	1	1	1	1	1	1	1	1	1	1	1	1	1	1	1	1	1	1	1	1	1	1	1	1	1	1	1	1	1	1	1	1	1	1	1	1	1	1	1	1	1	1
GO:0009410	response to xenobiotic stimulus	biological_process	1	1	1	1	1	1	1	1	1	1	1	1	1	1	1	1	1	1	1	1	1	1	1	1	1	1	1	1	1	1	1	1	1	1	1	1	1	1	1	1	1	1	1	1	1	1	1
GO:0009411	response to UV	biological_process	1	1	1	1	1	1	1	1	1	1	1	1	1	1	1	1	1	1	1	1	1	1	1	1	1	1	1	1	1	1	1	1	1	1	1	1	1	1	1	1	1	1	1	1	1	1	1
GO:0009416	response to light stimulus	biological_process	1	1	1	1	1	1	1	1	1	1	1	1	1	1	1	1	1	1	1	1	1	1	1	1	1	1	1	1	1	1	1	1	1	1	1	1	1	1	1	1	1	1	1	1	1	1	1
GO:0009435	NAD biosynthetic process	biological_process	1	1	1	1	1	1	1	1	1	1	1	1	1	1	1	1	1	1	1	1	1	1	1	1	1	1	1	1	1	1	1	1	1	1	1	1	1	1	1	1	1	1	1	1	1	1	1
GO:0009451	RNA modification	biological_process	1	1	1	1	1	1	1	1	1	1	1	1	1	1	1	1	1	1	1	1	1	1	1	1	1	1	1	1	1	1	1	1	1	1	1	1	1	1	1	1	1	1	1	1	1	1	1
GO:0009452	7-methylguanosine RNA capping	biological_process	1	1	1	1	1	1	1	1	1	1	1	1	1	1	1	1	1	1	1	1	1	1	1	1	1	1	1	1	1	1	1	1	1	1	1	1	1	1	1	1	1	1	1	1	1	1	1
GO:0009566	fertilization	biological_process	1	1	2.3904e-05	1	1	1	1	1	1	1	1	1	1	1	1	1	1	1	1	1	1	1	1	1	1	1	1	1	1	1	1	1	1	1	1	1	1	1	1	1	1	1	1	1	1	1	1
GO:0009605	response to external stimulus	biological_process	1	1	1	1	1	1	1	1	1	1	1	1	1	1	8.736e-05	1	1	1	1	1	1	1	1	1	1	1	1	6.112e-05	1	1	1	1	1	1	1	1	1	1	0.0023776	1	1	0.0011424	1	0.00348016	1	1	1
GO:0009607	response to biotic stimulus	biological_process	1	1	1	1	1	1	1	1	1	1	1	1	1	1	1	1	1	1	1	1	1	1	1	1	1	1	1	1	1	1	1	1	1	1	1	1	1	1	1	1	1	1	1	1	1	1	0.00336851
GO:0009611	response to wounding	biological_process	1	1	1	1	1	1	1	1	1	1	1	1	1	1	1	1	1	1	1	1	1	1	1	1	1	1	1	1	1	1	1	1	1	1	1	1	1	1	1	1	1	1	1	1	1	1	1
GO:0009612	response to mechanical stimulus	biological_process	1	1	1	1	1	1	1	1	1	1	1	1	1	1	1	1	1	1	1	1	1	1	1	1	1	1	1	1.1904e-05	0.00024992	0.0017728	1	1	1	1	1	1	1	1	1	1	1	1	1	1	1	0.0008224	1
GO:0009617	response to bacterium	biological_process	1	1	1	1	1	1	1	1	1	1	1	1	1	1	1	1	1	1	1	1	1	1	1	1	1	1	1	1	1	1	1	1	1	1	1	1	1	1	1	1	1	1	1	1	1	1	1
GO:0009620	response to fungus	biological_process	1	1	1	1	1	1	1	1	1	1	1	1	1	1	1	1	1	1	1	1	1	1	1	1	1	1	1	1	1	1	1	1	1	1	1	1	1	1	1	1	1	1	1	1	1	1	1
GO:0009628	response to abiotic stimulus	biological_process	1	1	1	1	1	1	1	1	1	1	1	1	1	1	1	1	1	1	1	1	1	1	1	1	1	1	3.936e-05	2.832e-06	1	1	5.216e-05	1	1	1	1	1	1	1	1	1	1	1	1	0.0023616	0.00368755	3.808e-05	1
GO:0009636	response to toxic substance	biological_process	1	1	1	1	1	1	1	1	1	1	1	1	1	1	1	1	1	1	1	1	1	1	1	1	1	1	1	1	1	1	1	1	1	1	1	1	1	1	1	1	1	1	1	1	1	1	1
GO:0009653	anatomical structure morphogenesis	biological_process	2.6912e-05	7.36e-10	1.44e-06	1	1	1	2.9952e-07	1.1584e-06	1	1	1	1	1	6.304e-10	5.696e-12	1	1	1.1328e-11	3.552e-12	1	0.00488717	3.1648e-05	1	2.3936e-06	1	1	1	1	1	1	1	1	0.00023936	1	1	3.744e-15	2.8768e-09	0.00025184	1.0496e-30	2.7168e-08	0.0050807	6.56e-26	4.544e-16	5.92e-12	1	1	1
GO:0009712	catechol-containing compound metabolic process	biological_process	1	1	1	1	1	1	1	1	1	1	1	1	1	1	1	1	1	1	1	1	1	1	1	1	1	1	1	1	1	1	1	1	1	1	1	1	1	1	1	1	1	1	1	1	1	1	1
GO:0009719	response to endogenous stimulus	biological_process	1	1	1	1	1	1	1	1	1	1	1	1	1	1	1	1	1	1	1	1	1	1	1	1	1	1	1	1	1	1	1	1	1	1	1	1	1	1	1	1	1	1	1	1	1	1	1
GO:0009725	response to hormone	biological_process	1	1	1	1	1	1	1	1	1	1	1	1	1	1	1	1	1	1	1	1	1	1	1	1	1	1	1	1	1	1	1	1	1	1	1	1	1	1	1	1	1	1	1	1	1	1	1
GO:0009786	regulation of asymmetric cell division	biological_process	1	1	1	1	1	1	1	1	1	1	1	1	1	1	1	1	1	1	1	1	1	1	1	1	1	1	1	1	1	1	1	1	1	1	1	1	1	1	1	1	1	1	1	1	1	1	1
GO:0009790	embryo development	biological_process	3.648e-64	1.3056e-113	8.32e-67	4.256e-10	1	0.00029664	1.0432e-27	2.512e-11	1	3.088e-06	1	1	1	1	1	1	1	2.16e-10	1.5584e-09	1	1	1	1	1	1	1	1	1	1	1	1	0.0016416	2.1376e-48	1.5072e-19	1.0112e-15	1.7536e-56	1.1552e-56	7.392e-26	1.0176e-10	1	6.208e-05	1	1	1	1	1	1
GO:0009791	post-embryonic development	biological_process	1.2992e-10	1.0432e-26	3.1744e-20	1	1	1	3.936e-13	0.00013536	0.00910691	7.168e-08	1	1	1	0.0005024	1	1	1	4.288e-11	4.224e-12	0.0030624	1	1	1	0.0007488	1	1	1	1	1	1	1	2.1184e-07	3.616e-10	1	0.00747482	7.232e-16	1.7152e-18	3.456e-12	1.68e-18	1	3.264e-08	9.216e-11	1	1	1	1	1
GO:0009792	embryo development ending in birth or egg hatching	biological_process	9.408e-66	1.2992e-113	1.616e-64	1.4848e-09	1	0.0003744	3.776e-28	2.3552e-10	1	3.936e-06	1	1	1	1	1	1	1	7.232e-08	1.9008e-07	1	1	1	1	1	1	1	1	1	1	1	1	1	1.5808e-48	2.624e-18	1.632e-15	4.864e-57	4.256e-58	8.672e-27	6.72e-10	1	0.0006688	1	1	1	1	1	1
GO:0009794	regulation of mitotic cell cycle	embryonic	biological_process	1	1	1	1	1	1	1	1	1	1	1	1	1	1	1	1	1	1	1	1	1	1	1	1	1	1	1	1	1	1	1	1	1	1	1	1	1	1	1	1	1	1	1	1	1	1
GO:0009798	axis specification	biological_process	1	1	1	1	1	1	1	1	1	1	1	1	1	1	1	1	1	1	1	1	1	1	1	1	1	1	1	1	1	1	1	1	1	1	1	1	1	1	1	1	1	1	1	1	1	1	1
GO:0009880	embryonic pattern specification	biological_process	0.00028064	0.0025184	1	1	1	1	1	1	1	1	1	1	1	1	1	1	1	1	1	1	1	1	1	1	1	1	1	1	1	1	1	1	6.176e-06	1	1	1	1	1	1	0.0020512	1	1	1	1	1	1	1
GO:0009886	post-embryonic morphogenesis	biological_process	1	1	1	1	1	1	1	1	1	1	1	1	1	1	1	1	1	1	1	1	1	1	1	1	1	1	1	1	1	1	1	1	1	1	1	1	1	1	1	1	1	1	1	1	1	1	1
GO:0009887	organ morphogenesis	biological_process	1	1	1	1	1	1	1	1	1	1	1	1	1	1	1	1	1	1	0.00018368	1	1	1	1	1	1	1	1	1	1	1	1	1	1	1	1	1	1	1	1	1	1	0.0013792	1	1	1	1	1
GO:0009888	tissue development	biological_process	0.00012512	2.1632e-07	0.00013184	1	1	0.00545171	1.4016e-05	0.0004416	1	1	1	1	1	0.00027328	0.0009952	1	1	2.6368e-07	3.552e-08	1	0.00756358	0.00589037	1	1	1	1	1	1	1	1	1	1	2.688e-06	1	1	5.792e-13	1.6032e-07	0.00022976	1.0752e-11	1	1	8.576e-08	1	1	1	1	1
GO:0009889	regulation of biosynthetic process	biological_process	1	1	1	1	1	1	1	1	1	1	1	1	1	1	1	1	5.408e-06	1.2512e-08	0.001216	1	3.2e-07	1	1	0.0019264	1	1	1	1	1	1	1	6.56e-09	1	1	0.0010688	0.0005568	1	1	1	1	3.1008e-05	4.704e-07	1	1	1	1	1
GO:0009890	negative regulation of biosynthetic process	biological_process	1	1	1	1	1	1	1	1	1	1	1	1	1	1	1	1	1	1	1	1	1	1	1	1	1	1	1	1	1	1	1	1	0.00835325	1	1	2.2368e-05	1	1	1	1	1	1	1	1	1	1	1
GO:0009891	positive regulation of biosynthetic process	biological_process	1	1	1	1	1	1	1	1	1	0.00528854	1	1	1	1	1	1	1	7.648e-05	1	1	0.000976	1	1	1	1	1	1	1	1	1	1	9.248e-06	1	1	1	1	1	1	1	1	0.0004768	0.00027296	1	1	1	1	1
GO:0009892	negative regulation of metabolic process	biological_process	0.0004736	3.616e-08	3.36e-06	1	1	1	1	1	1	1	1	1	1	1	1	1	1	1	1	1	1	1	1	1	1	1	1	1	1	1	1	1	1.3472e-05	1	1	1.9552e-05	0.00843997	1	0.00499357	1	1	1	1	1	1	1	1
GO:0009893	positive regulation of metabolic process	biological_process	1	1	1	1	1	1	1	1	1	0.0096249	1	1	1	1	1	1	1	0.0002896	1	1	0.0027232	1	1	1	1	1	1	1	1	1	1	9.568e-06	1	1	1	1	1	1	1	1	0.0025888	0.0009216	1	1	1	1	1
GO:0009894	regulation of catabolic process	biological_process	1	1	1	1	1	1	1	1	1	1	1	1	1	1	1	1	1	1	1	1	1	1	1	1	1	1	1	1	1	1	1	1	1	1	1	1	1	1	1	1	1	1	1	1	1	1	1
GO:0009898	cytoplasmic side of plasma membrane	cellular_component	1	1	1	1	1	1	1	1	1	1	1	1	1	1	1	1	1	1	1	1	1	1	1	1	1	1	1	1	1	1	1	1	1	1	1	1	1	1	1	1	1	1	1	1	1	1	1
GO:0009913	epidermal cell differentiation	biological_process	1	1	1	1	1	1	1	1	1	1	1	1	1	1	1	1	1	1	1	1	1	1	1	1	1	1	1	1	1	1	1	1	1	1	1	1	1	1	1	1	1	1	1	1	1	1	1
GO:0009946	proximal/distal axis specification	biological_process	1	1	1	1	1	1	1	1	1	1	1	1	1	1	1	1	1	1	1	1	1	1	1	1	1	1	1	1	1	1	1	1	1	1	1	1	1	1	1	1	1	1	1	1	1	1	1
GO:0009948	anterior/posterior axis specification	biological_process	1	1	1	1	1	1	1	1	1	1	1	1	1	1	1	1	1	1	1	1	1	1	1	1	1	1	1	1	1	1	1	1	1	1	1	1	1	1	1	1	1	1	1	1	1	1	1
GO:0009949	polarity specification of anterior/posterior axis	biological_process	1	1	1	1	1	1	1	1	1	1	1	1	1	1	1	1	1	1	1	1	1	1	1	1	1	1	1	1	1	1	1	1	1	1	1	1	1	1	0.00418739	1	1	1	1	1	1	1	1
GO:0009952	anterior/posterior pattern specification	biological_process	1	1	1	1	1	1	1	1	1	1	1	1	1	1	1	1	1	1	1	1	1	1	1	1	1	1	1	1	1	1	1	1	1	1	1	1	1	1	1	1	1	1	1	1	1	1	1
GO:0009954	proximal/distal pattern formation	biological_process	1	1	1	1	1	1	1	1	1	1	1	1	1	1	1	1	1	1	1	1	1	1	1	1	1	1	1	1	1	1	1	1	1	1	1	1	1	1	1	1	1	1	1	1	1	1	1
GO:0009966	regulation of signal transduction	biological_process	1	1	1	1	1	1	1	1	1	1	1	1	1	0.00321446	1	1	1	1	1	1	1	1	1	1	1	1	1	1	1	1	1	1	1	1	1	1	1	1	1	1	1	1	1	1	1	1	1
GO:0009967	positive regulation of signal transduction	biological_process	1	1	1	1	1	1	1	1	1	1	1	1	1	1	1	1	1	1	1	1	1	1	1	1	1	1	1	1	1	1	1	1	1	1	1	1	1	1	1	1	1	1	1	1	1	1	1
GO:0009968	negative regulation of signal transduction	biological_process	1	1	1	1	1	1	1	1	1	1	1	1	1	1	1	1	1	1	1	1	1	1	1	1	1	1	1	1	1	1	1	1	1	1	1	1	1	1	1	1	1	1	1	1	1	1	1
GO:0009975	cyclase activity	molecular_function	1	1	1	1	1	1	1	1	1	1	1	1	1	1	1	1	1	1	1	1	1	1	1	1	1	1	2.0768e-05	1.3632e-09	1	1	1	1	1	1	1	1	1	1	1	1	1	1	1	1	1	1	1
GO:0009982	pseudouridine synthase activity	molecular_function	1	1	1	1	1	1	1	1	1	1	1	1	1	1	1	1	1	1	1	1	1	1	1	1	1	1	1	1	1	1	1	1	1	1	1	1	1	1	1	1	1	1	1	1	1	1	1
GO:0009986	cell surface	cellular_component	1	1	1	1	1	1	1	1	1	1	1	1	1	1	1	1	1	1	1	1	1	1	1	1	1	1	1	1	1	1	1	1	1	1	1	1	1	1	1	1	1	1	1	1	1	1	1
GO:0009987	cellular process	biological_process	4.48e-23	1.488e-48	2.6048e-33	0.0001904	1	0.0017536	8.672e-20	2.72e-08	0.00021856	1.92e-06	0.00432122	1	1	0.00021344	4.864e-06	1	1	5.792e-18	3.808e-13	0.0005984	1.4304e-08	1.76e-07	1	1	1	1	1	1	1	1	1	8.832e-09	2.4928e-32	0.00343987	0.00367619	4.672e-25	1.04e-26	7.392e-18	4.224e-19	1	1.2768e-09	2.0064e-06	3.936e-07	1	1	1	1
GO:0009991	response to extracellular stimulus	biological_process	1	1	1	1	1	1	1	1	1	1	1	1	1	1	1	1	1	1	1	1	1	1	1	1	1	1	1	1	1	1	1	1	1	1	1	1	1	1	1	1	1	1	1	1	1	1	1
GO:0009994	oocyte differentiation	biological_process	1	1	1	1	1	1	1	1	1	1	1	1	1	1	1	1	1	1	1	1	1	1	1	1	1	1	1	1	1	1	1	1	0.00152	1	1	1	1	1	1	1	1	1	1	1	1	1	1
GO:0010008	endosome membrane	cellular_component	1	1	1	1	1	1	1	1	1	1	1	1	1	1	1	1	1	1	1	1	1	1	1	1	1	1	1	1	1	1	1	1	1	1	1	1	1	1	1	1	1	1	1	1	1	1	1
GO:0010033	response to organic substance	biological_process	1	0.00526694	1	1	1	1	1	1	1	1	1	1	1	1	1	1	1	1	1	1	1	1	1	1	1	1	1	1	1	1	1	1	1	1	1	1	1	1	1	1	1	1	1	1	1	1	1
GO:0010035	response to inorganic substance	biological_process	1	1	1	1	1	1	1	1	1	1	1	1	1	1	1	1	1	1	1	1	1	1	1	1	1	1	1	1	1	1	1	1	1	1	1	1	1	1	1	1	1	1	1	1	1	1	1
GO:0010038	response to metal ion	biological_process	1	1	1	1	1	1	1	1	1	1	1	1	1	1	1	1	1	1	1	1	1	1	1	1	1	1	1	1	1	1	1	1	1	1	1	1	1	1	1	1	1	1	1	1	1	1	1
GO:0010085	polarity specification of proximal/distal axis	biological_process	1	1	1	1	1	1	1	1	1	1	1	1	1	1	1	1	1	1	1	1	1	1	1	1	1	1	1	1	1	1	1	1	1	1	1	1	1	1	1	1	1	1	1	1	1	1	1
GO:0010171	body morphogenesis	biological_process	1	0.00010528	1	1	1	1	2.9376e-06	5.344e-06	1	1	1	1	1	3.0304e-05	1.3856e-05	1	1	8e-06	1.4272e-05	1	1	0.0024352	1	1	1	1	1	1	1	1	1	1	1	1	0.004344	2.528e-11	6.432e-09	0.0012224	3.0112e-18	3.456e-05	1	1.232e-14	2.8032e-06	0.0019104	1	1	1
GO:0010172	embryonic body morphogenesis	biological_process	1	1	1	1	1	1	1	1	1	1	1	1	1	1	1	1	1	1	1	1	1	1	1	1	1	1	1	1	1	1	1	1	1	1	1	1	1	1	1	1	1	0.00588035	0.0007552	1	1	1	1
GO:0010181	FMN binding	molecular_function	1	1	1	1	1	1	1	1	1	1	1	1	1	1	1	1	1	1	1	1	1	1	1	1	1	1	1	1	1	1	1	1	1	1	1	1	1	1	1	1	1	1	1	1	1	1	1
GO:0010212	response to ionizing radiation	biological_process	1	1	1	1	1	1	1	1	1	1	1	1	1	1	1	1	1	1	1	1	1	1	1	1	1	1	1	1	1	1	1	1	1	1	1	1	1	1	1	1	1	1	1	1	1	1	1
GO:0010259	multicellular organismal aging	biological_process	6.368e-07	2.1856e-11	2.1344e-09	1	1	1	1	1	1	1	1	1	1	1	1	1	1	1	1	1	1	1	1	1	1	1	1	1	1	1	1	1	4.096e-06	1	1	1	1	1	1	1	1	1	1	1	1	1	1
GO:0010324	membrane invagination	biological_process	2.688e-05	8.032e-21	4.896e-09	1	1	1	4.256e-06	1	0.0019232	1	1	1	1	1	1	1	1	1	1	1	1	1	1	1	1	1	1	1	1	1	1	1	1.6416e-07	1	1	0.0003616	6.752e-05	1	9.856e-06	1	1	1	1	1	1	1	1
GO:0010340	carboxyl-O-methyltransferase activity	molecular_function	1	1	1	1	1	1	1	1	1	1	1	1	1	1	1	1	1	1	1	1	1	1	1	1	1	1	1	1	1	1	1	1	1	1	1	1	1	1	1	1	1	1	1	1	1	1	1
GO:0010453	regulation of cell fate commitment	biological_process	1	1	1	1	1	1	1	1	1	1	1	1	1	1	1	1	1	1	1	1	1	1	1	1	1	1	1	1	1	1	1	1	1	1	1	1	1	1	1	1	1	0.0025824	1	1	1	1	1
GO:0010467	gene expression	biological_process	1	1	1.264e-05	0.00015264	1	1	0.00695245	1	1	1	1	1	1	1	1	1	4.352e-07	2.4e-05	0.00332733	1	0.0015584	1	1	1	1	1	1	1	1	1	1	7.744e-06	1	1	1.7408e-05	0.00483514	1	0.0008448	1	1	2.5632e-09	1	1	1	1	1	1
GO:0010468	regulation of gene expression	biological_process	1	1	1	1	1	1	1	1	1	1	1	1	1	1	1	1	7.2e-07	2.6752e-07	0.0007136	1	7.808e-07	1	1	1	1	1	1	1	1	1	1	1.8976e-08	1	1	0.001168	4.288e-05	1	1	1	1	0.0004864	2.6528e-06	0.00623734	1	1	1	1
GO:0010498	proteasomal protein catabolic process	biological_process	1	1	1	1	1	1	1	1	1	1	1	1	1	1	1	1	1	1	1	1	1	1	1	1	1	1	1	1	1	1	1	1	1	1	1	1	1	1	1	1	1	1	1	1	1	1	1
GO:0010556	regulation of macromolecule biosynthetic process	biological_process	1	1	1	1	1	1	1	1	1	1	1	1	1	1	1	1	4.352e-06	9.504e-09	0.0010592	1	2.5632e-07	1	1	0.0017088	1	1	1	1	1	1	1	4.8e-09	1	1	0.00088	0.0004672	1	1	1	1	2.256e-05	8.768e-07	1	1	1	1	1
GO:0010557	positive regulation of macromolecule biosynthetic process	biological_process	1	1	1	1	1	1	1	1	1	0.00492384	1	1	1	1	1	1	1	6.528e-05	1	1	0.0008608	1	1	1	1	1	1	1	1	1	1	7.584e-06	1	1	1	1	1	1	1	1	0.0003872	0.00023552	1	1	1	1	1
GO:0010558	negative regulation of macromolecule biosynthetic process	biological_process	1	1	1	1	1	1	1	1	1	1	1	1	1	1	1	1	1	1	1	1	1	1	1	1	1	1	1	1	1	1	1	1	1	1	1	1.5392e-05	1	1	1	1	1	1	1	1	1	1	1
GO:0010564	regulation of cell cycle process	biological_process	1	1	0.00838614	1	1	1	1	1	1	1	1	1	1	1	1	1	1	1	1	1	1	1	1	1	1	1	1	1	1	1	1	1	1	1	1	4.864e-09	0.001136	0.0009824	1	1	1	1	1	1	1	1	1
GO:0010604	positive regulation of macromolecule metabolic process	biological_process	1	1	1	1	1	1	1	1	1	0.0096249	1	1	1	1	1	1	1	0.0002896	1	1	0.0027232	1	1	1	1	1	1	1	1	1	1	9.568e-06	1	1	1	1	1	1	1	1	0.0025888	0.0009216	1	1	1	1	1
GO:0010605	negative regulation of macromolecule metabolic process	biological_process	0.0003744	2.3072e-08	2.4864e-06	1	1	1	1	1	1	1	1	1	1	1	1	1	1	1	1	1	1	1	1	1	1	1	1	1	1	1	1	1	3.0592e-05	1	1	1.6192e-05	0.00761421	1	0.00430278	1	1	1	1	1	1	1	1
GO:0010608	posttranscriptional regulation of gene expression	biological_process	9.984e-05	2.6144e-10	3.456e-05	1	1	1	1	1	1	1	1	1	1	1	1	1	1	1	1	1	1	1	1	1	1	1	1	1	1	1	1	1	3.296e-06	1	1	1	1	1	0.00444861	1	1	1	1	1	1	1	1
GO:0010628	positive regulation of gene expression	biological_process	1	1	1	1	1	1	1	1	1	0.0024544	1	1	1	1	1	1	1	0.00048	1	1	0.00840102	1	1	1	1	1	1	1	1	1	1	0.0002096	1	1	1	1	1	1	1	1	1	0.0017856	1	1	1	1	1
GO:0010629	negative regulation of gene expression	biological_process	1	1.312e-06	6.688e-06	1	1	1	1	1	1	1	1	1	1	1	1	1	1	1	1	1	1	1	1	1	1	1	1	1	1	1	1	1	0.0022336	1	1	1.4784e-05	0.00333994	1	1	1	1	1	1	1	1	1	1
GO:0010631	epithelial cell migration	biological_process	1	1	1	1	1	1	1	1	1	1	1	1	1	1	1	1	1	1	1	1	1	1	1	1	1	1	1	1	1	1	1	1	1	1	1	1	1	1	1	1	1	1	1	1	1	1	1
GO:0010638	positive regulation of organelle organization	biological_process	1	1	1	1	1	1	1	1	1	1	1	1	1	1	1	1	1	1	1	1	1	1	1	1	1	1	1	1	1	1	1	1	1	1	1	1	1	1	1	1	1	1	1	1	1	1	1
GO:0010639	negative regulation of organelle organization	biological_process	1	1	1	1	1	1	9.216e-05	1	1	1	1	1	1	1	1	1	1	1	1	1	1	1	1	1	1	1	1	1	1	1	1	1	1	1	1	3.1168e-05	0.0019968	1	1	1	1	1	1	1	1	1	1
GO:0010646	regulation of cell communication	biological_process	1	1	1	1	1	1	1	1	1	1	1	1	1	1	1	1	1	1	1	1	1	1	1	1	1	1	1	1	1	1	1	1	1	1	1	1	1	1	1	1	1	1	1	1	1	1	1
GO:0010647	positive regulation of cell communication	biological_process	1	1	1	1	1	1	1	1	1	1	1	1	1	1	1	1	1	1	1	1	1	1	1	1	1	1	1	1	1	1	1	1	1	1	1	1	1	1	1	1	1	1	1	1	1	1	1
GO:0010648	negative regulation of cell communication	biological_process	1	1	1	1	1	1	1	1	1	1	1	1	1	1	1	1	1	1	1	1	1	1	1	1	1	1	1	1	1	1	1	1	1	1	1	1	1	1	1	1	1	1	1	1	1	1	1
GO:0010769	regulation of cell morphogenesis involved in differentiation	biological_process	1	1	1	1	1	1	1	1	1	1	1	1	1	1	1	1	1	1	1	1	1	1	1	1	1	1	1	1	1	1	1	1	1	1	1	1	1	1	1	1	1	1	1	1	1	1	1
GO:0010876	lipid localization	biological_process	1	1	1	1	1	1	1	1	1	1	1	1	1	1	1	1	1	1	1	1	1	1	1	1	1	1	1	1	1	1	1	1	1	1	1	1	1	1	1	1	1	1	1	1	1	1	1
GO:0010927	cellular component assembly involved in morphogenesis	biological_process	1	1	1	1	1	1	1	1	1	1	1	1	1	1	1	1	1	1	1	1	1	1	1	3.264e-07	0.00014464	1	1	1	1	1	1	1	1	1	1	1	1	1	8.32e-05	1	1	0.001328	8.64e-11	8.032e-16	4.384e-06	1	1
GO:0010941	regulation of cell death	biological_process	1	1	1	1	1	1	1	1	1	1	1	1	1	1	1	1	1	1	1	1	1	1	1	1	1	1	1	1	1	1	1	1	1	1	1	1	1	0.0030304	1	1	1	1	1	1	1	1	1
GO:0010942	positive regulation of cell death	biological_process	1	1	1	1	1	1	1	1	1	1	1	1	1	1	1	1	1	1	1	1	1	1	1	1	1	1	1	1	1	1	1	1	1	1	1	1	1	0.0004512	1	1	1	1	1	1	1	1	1
GO:0010948	negative regulation of cell cycle process	biological_process	1	1	1	1	1	1	1	1	1	1	1	1	1	1	1	1	1	1	1	1	1	1	1	1	1	1	1	1	1	1	1	1	1	1	1	6.048e-06	0.0007872	1	1	1	1	1	1	1	1	1	1
GO:0010959	regulation of metal ion transport	biological_process	1	1	1	1	1	1	1	1	1	1	1	1	1	1	1	1	1	1	1	1	1	1	1	1	1	1	1	1	1	1	1	1	1	1	1	1	1	1	1	1	1	1	1	1	1	1	1
GO:0010970	microtubule-based transport	biological_process	1	1	1	1	1	1	1	1	1	1	1	1	1	1	1	1	1	1	1	1	1	1	1	1	0.0017536	0.0019392	1	1	1	1	1	1	1	1	1	1	1	1	1	1	1	1	1	0.00403814	4.608e-05	1	1
GO:0010975	regulation of neuron projection development	biological_process	1	1	1	1	1	1	1	1	1	1	1	1	1	1	1	1	1	1	1	1	1	1	1	1	1	1	1	1	1	1	1	1	1	1	1	1	1	1	1	1	1	1	1	1	1	1	1
GO:0012501	programmed cell death	biological_process	1	1	1	1	1	1	1	1	1	1	1	1	1	1	1	1	1	1	1	1	1	1	1	1	1	1	1	1	1	1	1	0.0017408	0.0010272	1	1	0.0016672	1	0.00997901	1	1	1	1	1	1	1	1	1
GO:0012502	induction of programmed cell death	biological_process	1	1	1	1	1	1	1	1	1	1	1	1	1	1	1	1	1	1	1	1	1	1	1	1	1	1	1	1	1	1	1	1	1	1	1	1	1	1	1	1	1	1	1	1	1	1	1
GO:0012505	endomembrane system	cellular_component	0.0006112	8.8e-07	1	1	1	1	1	1	1	1	1	1	1	1	1	1	1	1	1	1	1	1	1	1	1	1	1	1	1	1	1	1	0.00011808	1	1	1	1	1	1	1	1	1	1	1	1	1	1
GO:0012506	vesicle membrane	cellular_component	1	1	1	1	1	1	1	1	1	1	1	1	1	1	1	1	1	1	1	1	1	1	1	1	1	1	1	1	1	1	1	1	1	1	1	1	1	1	1	1	1	1	1	1	1	1	1
GO:0014016	neuroblast differentiation	biological_process	1	1	1	1	1	1	1	1	1	1	1	1	1	1	1	1	1	1	1	1	1	1	1	1	1	1	1	1	1	1	1	1	1	1	1	1	1	1	1	1	1	1	1	1	1	1	1
GO:0014866	skeletal myofibril assembly	biological_process	1	1	1	1	1	1	1	1	1	1	1	1	1	1	1	1	1	1	1	1	1	1	1	1	1	1	1	1	1	1	1	1	1	1	1	1	1	1	1	1	1	1	5.632e-05	1	1	1	1
GO:0015002	heme-copper terminal oxidase activity	molecular_function	1	1	1	1	1	1	1	1	1	1	1	1	1	1	1	1	1	1	1	1	1	1	1	1	1	1	1	1	1	1	1	1	1	0.00341264	0.00336803	1	1	1	1	1	1	1	1	1	1	1	1
GO:0015018	galactosylgalactosylxylosylprotein 3-beta-glucuronosyltransferase activity	molecular_function	1	1	1	1	1	1	1	1	1	1	1	1	1	1	1	1	1	1	1	1	1	1	1	1	1	1	1	1	1	1	1	1	1	1	1	1	1	1	1	1	1	1	1	1	1	1	1
GO:0015020	glucuronosyltransferase activity	molecular_function	1	1	1	1	1	1	1	1	1	1	1	1	1	1	1	1	1	1	1	1	1	1	1	1	1	1	1	1	1	1	1	1	1	1	1	1	1	1	1	1	1	1	1	1	1	1	1
GO:0015031	protein transport	biological_process	7.456e-05	0.0005856	1	1	1	1	1	1	1	1	1	1	1	1	1	1	1	1	1	1	1	1	1	1	1	1	1	1	1	1	1	1	1	1	1	1	1	1	1	1	1	1	1	1	1	1	1
GO:0015035	protein disulfide oxidoreductase activity	molecular_function	1	1	1	1	1	1	1	1	1	1	0.00889507	1	1	1	1	1	1	1	1	1	1	1	1	1	1	1	1	1	1	1	1	1	1	1	1	1	1	1	1	1	1	1	1	1	1	1	1
GO:0015036	disulfide oxidoreductase activity	molecular_function	1	1	1	1	1	1	1	1	1	1	1	1	1	1	1	1	1	1	1	1	1	1	1	1	1	1	1	1	1	1	1	1	1	1	1	1	1	1	1	1	1	1	1	1	1	1	1
GO:0015075	ion transmembrane transporter activity	molecular_function	1	1	1	1	1	1	1	1	1	1	1	1	1	1	1	1	1	1	1	1	1	1	1	1	1	1	1.1456e-14	1.0592e-31	3.648e-31	2.5312e-20	6.56e-11	1	1	1	1	1	1	1	1	1	1	1	1	1	0.0003936	9.408e-14	1
GO:0015077	monovalent inorganic cation transmembrane transporter activity	molecular_function	1	1	0.0007808	1	1	1	1	1	1	1	1	1	1	1	1	1	1	1	1	1	1	1	1	1	1	1	1	1	1	1	1	1	1	1	0.00915846	1	1	1	1	1	1	1	1	1	1	1	1
GO:0015078	hydrogen ion transmembrane transporter activity	molecular_function	1	1	0.0025152	1	1	1	1	1	1	1	1	1	1	1	1	1	1	1	1	1	1	1	1	1	1	1	1	1	1	1	1	1	1	0.0077127	0.0003232	1	1	1	1	1	1	1	1	1	1	1	1
GO:0015079	potassium ion transmembrane transporter activity	molecular_function	1	1	1	1	1	1	1	1	1	1	1	1	1	1	1	1	1	1	1	1	1	1	1	1	1	1	1	1	1	1	0.0001904	1	1	1	1	1	1	1	1	1	1	1	1	1	1	1	1
GO:0015081	sodium ion transmembrane transporter activity	molecular_function	1	1	1	1	1	1	1	1	1	1	1	1	1	1	1	1	1	1	1	1	1	1	1	1	1	1	1	1	1	1	1	1	1	1	1	1	1	1	1	1	1	1	1	1	1	1	1
GO:0015085	calcium ion transmembrane transporter activity	molecular_function	1	1	1	1	1	1	1	1	1	1	1	1	1	1	1	1	1	1	1	1	1	1	1	1	1	1	1	1	1	1	1	1	1	1	1	1	1	1	1	1	1	1	1	1	1	1	1
GO:0015093	ferrous iron transmembrane transporter activity	molecular_function	1	1	1	1	1	1	1	1	1	1	1	1	1	1	1	1	1	1	1	1	1	1	1	1	1	1	1	1	1	1	1	1	1	1	1	1	1	1	1	1	1	1	1	1	1	1	1
GO:0015101	organic cation transmembrane transporter activity	molecular_function	1	1	1	1	1	1	1	1	1	1	1	1	1	1	1	1	1	1	1	1	1	1	1	1	1	1	1	1	1	1	1	1	1	1	1	1	1	1	1	1	1	1	1	1	1	1	1
GO:0015103	inorganic anion transmembrane transporter activity	molecular_function	1	1	1	1	1	1	1	1	1	1	1	1	1	1	1	1	1	1	1	1	1	1	1	1	1	1	1	1	1	1	1	1	1	1	1	1	1	1	1	1	1	1	1	1	1	1	1
GO:0015114	phosphate ion transmembrane transporter activity	molecular_function	1	1	1	1	1	1	1	1	1	1	1	1	1	1	1	1	1	1	1	1	1	1	1	1	1	1	1	1	1	1	1	1	1	1	1	1	1	1	1	1	1	1	1	1	1	1	1
GO:0015116	sulfate transmembrane transporter activity	molecular_function	1	1	1	1	1	1	1	1	1	1	1	1	1	1	1	1	1	1	1	1	1	1	1	1	1	1	1	1	1	1	1	1	1	1	1	1	1	1	1	1	1	1	1	1	1	1	1
GO:0015144	carbohydrate transmembrane transporter activity	molecular_function	1	1	1	1	1	1	1	1	1	1	1	1	1	1	1	1	1	1	1	1	1	1	1	1	1	1	1	1	1	1	1	1	1	1	1	1	1	1	1	1	1	1	1	1	1	1	1
GO:0015171	amino acid transmembrane transporter activity	molecular_function	1	1	1	1	1	1	1	1	1	1	1	1	1	1	1	1	1	1	1	1	1	1	1	1	1	1	1	1	1	1	1	1	1	1	1	1	1	1	1	1	1	1	1	1	1	1	1
GO:0015250	water channel activity	molecular_function	1	1	1	1	1	1	1	1	1	1	1	1	1	1	1	1	1	1	1	1	1	1	1	1	1	1	1	1	1	1	1	1	1	1	1	1	1	1	1	1	1	1	1	1	1	1	1
GO:0015267	channel activity	molecular_function	1	1	1	1	1	1	1	1	1	1	1	1	1	1	1	1	1	1	1	1	1	1	1	1	1	1	8.48e-13	1.0432e-38	2.224e-43	4.352e-28	2.9152e-09	1	1	1	1	1	1	1	1	1	1	1	1	1	1	5.888e-20	1
GO:0015269	calcium-activated potassium channel activity	molecular_function	1	1	1	1	1	1	1	1	1	1	1	1	1	1	1	1	1	1	1	1	1	1	1	1	1	1	1	1	1	1	1	1	1	1	1	1	1	1	1	1	1	1	1	1	1	1	1
GO:0015276	ligand-gated ion channel activity	molecular_function	1	1	1	1	1	1	1	1	1	1	1	1	1	1	1	1	1	1	1	1	1	1	1	1	1	1	1.0944e-06	1.8592e-24	2.5536e-24	1.056e-16	1	1	1	1	1	1	1	1	1	1	1	1	1	1	1	1.8624e-08	1
GO:0015291	secondary active transmembrane transporter activity	molecular_function	1	1	1	1	1	1	1	1	1	1	1	1	1	1	1	1	1	1	1	1	1	1	1	1	1	1	1	1	1	1	1	1	1	1	1	1	1	1	1	1	1	1	1	1	1	1	1
GO:0015293	symporter activity	molecular_function	1	1	1	1	1	1	1	1	1	1	1	1	1	1	1	1	1	1	1	1	1	1	1	1	1	1	1	1	1	1	1	1	1	1	1	1	1	1	1	1	1	1	1	1	1	1	1
GO:0015294	solute:cation symporter activity	molecular_function	1	1	1	1	1	1	1	1	1	1	1	1	1	1	1	1	1	1	1	1	1	1	1	1	1	1	1	1	1	1	1	1	1	1	1	1	1	1	1	1	1	1	1	1	1	1	1
GO:0015295	solute:proton symporter activity	molecular_function	1	1	1	1	1	1	1	1	1	1	1	1	1	1	1	1	1	1	1	1	1	1	1	1	1	1	1	1	1	1	1	1	1	1	1	1	1	1	1	1	1	1	1	1	1	1	1
GO:0015296	anion:cation symporter activity	molecular_function	1	1	1	1	1	1	1	1	1	1	1	1	1	1	1	1	1	1	1	1	1	1	1	1	1	1	1	1	0.00997302	1	1	1	1	1	1	1	1	1	1	1	1	1	1	1	1	1	1
GO:0015297	antiporter activity	molecular_function	1	1	1	1	1	1	1	1	1	1	1	1	0.00990768	1	1	1	1	1	1	1	1	0.0014496	1	1	1	1	0.00366752	1	1	1	1	1	1	1	1	1	1	1	1	1	1	1	1	1	1	1	1
GO:0015298	solute:cation antiporter activity	molecular_function	1	1	1	1	1	1	1	1	1	1	1	1	0.00516038	1	1	1	1	1	1	1	1	0.0004704	1	1	1	1	1	1	1	1	1	1	1	1	1	1	1	1	1	1	1	1	1	1	1	1	1
GO:0015299	solute:proton antiporter activity	molecular_function	1	1	1	1	1	1	1	1	1	1	1	1	0.0028	1	1	1	1	1	1	1	1	0.00406221	1	1	1	1	1	1	1	1	1	1	1	1	1	1	1	1	1	1	1	1	1	1	1	1	1
GO:0015370	solute:sodium symporter activity	molecular_function	1	1	1	1	1	1	1	1	1	1	1	1	1	1	1	1	1	1	1	1	1	1	1	1	1	1	1	1	1	1	1	1	1	1	1	1	1	1	1	1	1	1	1	1	1	1	1
GO:0015385	sodium:proton antiporter activity	molecular_function	1	1	1	1	1	1	1	1	1	1	1	1	1	1	1	1	1	1	1	1	1	1	1	1	1	1	1	1	1	1	1	1	1	1	1	1	1	1	1	1	1	1	1	1	1	1	1
GO:0015399	primary active transmembrane transporter activity	molecular_function	1	1	1	1	1	1	1	1	1	1	1	1	1	1	1	1	1	1	1	1	1	1	1	1	1	1	1	1	1	1	1	1	0.0064408	1	1	1	1	1	1	1	1	1	1	1	1	1	1
GO:0015405	P-P-bond-hydrolysis-driven transmembrane transporter activity	molecular_function	1	1	1	1	1	1	1	1	1	1	1	1	1	1	1	1	1	1	1	1	1	1	1	1	1	1	1	1	1	1	1	1	0.0064408	1	1	1	1	1	1	1	1	1	1	1	1	1	1
GO:0015450	P-P-bond-hydrolysis-driven protein transmembrane transporter activity	molecular_function	1	1	1	1	1	1	1	1	1	1	1	1	1	1	1	1	1	1	1	1	1	1	1	1	1	1	1	1	1	1	1	1	1	1	1	1	1	1	1	1	1	1	1	1	1	1	1
GO:0015459	potassium channel regulator activity	molecular_function	1	1	1	1	1	1	1	1	1	1	1	1	1	1	1	1	1	1	1	1	1	1	1	1	1	1	1	1	1	1	1	1	1	1	1	1	1	1	1	1	1	1	1	1	1	1	1
GO:0015464	acetylcholine receptor activity	molecular_function	1	1	1	1	1	1	1	1	1	1	1	1	1	1	1	1	1	1	1	1	1	1	1	1	1	1	1	0.0010112	1	1	1	1	1	1	1	1	1	1	1	1	1	1	1	1	1	1	1
GO:0015491	cation:cation antiporter activity	molecular_function	1	1	1	1	1	1	1	1	1	1	1	1	1	1	1	1	1	1	1	1	1	0.0020736	1	1	1	1	1	1	1	1	1	1	1	1	1	1	1	1	1	1	1	1	1	1	1	1	1
GO:0015629	actin cytoskeleton	cellular_component	1	1	1	1	1	1	1	1	1	1	1	1	1	1	1	1	1	1	1	1	1	1	1	1	1	1	0.00822707	0.00369661	1	1	0.0002032	1	1	1	1	1	1	1	1	1	1	1	0.0004192	9.248e-08	2.3808e-07	1	1
GO:0015630	microtubule cytoskeleton	cellular_component	1	1	0.00048	1	1	1	0.00791984	1	0.00455629	1	1	1	1	1	1	1	1	1	1	1	1	1	1	1	1	1	1	1	1	1	1	1	1	1	1	1.9392e-09	4.704e-13	0.0006432	1	1	1	1	1	1	1	1	1
GO:0015631	tubulin binding	molecular_function	1	1	1	1	1	1	1	1	1	1	1	1	1	1	1	1	1	1	1	1	1	1	1	1	1	1	1	1	1	1	1	1	1	1	1	1	1	1	1	1	1	1	1	1	1	1	1
GO:0015662	ATPase activity	coupled to transmembrane movement of ions	phosphorylative mechanism	molecular_function	1	1	1	1	1	1	1	1	1	1	1	1	1	1	1	1	1	1	1	1	1	1	1	1	1	1	1	1	1	1	4.608e-05	1	0.00016832	1	1	1	1	1	1	1	1	1	1	1	1
GO:0015669	gas transport	biological_process	1	1	1	1	1	1	1	1	1	1	1	1	1	1	1	1	1	1	1	1	1	1	1	1	1	1	1	1	2.8032e-10	3.872e-10	1	1	1	1	1	1	1	1	1	1	1	1	1	1	1	1	1
GO:0015671	oxygen transport	biological_process	1	1	1	1	1	1	1	1	1	1	1	1	1	1	1	1	1	1	1	1	1	1	1	1	1	1	1	1	2.8032e-10	3.872e-10	1	1	1	1	1	1	1	1	1	1	1	1	1	1	1	1	1
GO:0015672	monovalent inorganic cation transport	biological_process	1	1	1	1	1	1	1	1	1	1	1	1	1	1	1	1	1	1	1	1	1	1	1	1	1	1	1.3088e-05	9.12e-11	9.664e-18	3.872e-16	1.6256e-05	1	1	1	1	1	1	1	1	1	1	1	1	1	1	9.568e-06	1
GO:0015684	ferrous iron transport	biological_process	1	1	1	1	1	1	1	1	1	1	1	1	1	1	1	1	1	1	1	1	1	1	1	1	1	1	1	1	1	1	1	1	1	1	1	1	1	1	1	1	1	1	1	1	1	1	1
GO:0015698	inorganic anion transport	biological_process	1	1	1	1	1	1	1	1	1	1	1	1	1	1	1	1	1	1	1	1	1	1	1	1	1	1	1	1	1	1	1	1	1	1	1	1	1	1	1	1	1	1	1	1	1	1	1
GO:0015780	nucleotide-sugar transport	biological_process	1	1	1	1	1	1	1	1	1	1	1	1	1	1	1	1	1	1	1	1	1	1	1	1	1	1	1	1	1	1	1	1	1	1	1	1	1	1	1	1	1	1	1	1	1	1	1
GO:0015833	peptide transport	biological_process	1	1	1	1	1	1	1	1	1	1	1	1	1	1	1	1	1	1	1	1	1	1	1	1	1	1	0.00570333	1	1	1	1	1	1	1	1	1	1	1	1	1	1	1	1	1	1	1	1
GO:0015837	amine transport	biological_process	1	1	1	1	1	1	1	1	1	1	1	1	1	1	1	1	1	1	1	1	1	1	1	1	1	1	1	1	1	1	1	1	1	1	1	1	1	1	1	1	1	1	1	1	1	1	1
GO:0015849	organic acid transport	biological_process	1	1	1	1	1	1	1	1	1	1	1	1	1	1	1	1	1	1	1	1	1	1	1	1	1	1	1	1	3.616e-05	0.00030208	1	1	1	1	1	1	1	1	1	1	1	1	1	1	1	1	1
GO:0015850	organic hydroxy compound transport	biological_process	1	1	1	1	1	1	1	1	1	1	1	1	1	1	1	1	1	1	1	1	1	1	1	1	1	1	1	1	1	1	1	1	1	1	1	1	1	1	1	1	1	1	1	1	1	1	1
GO:0015870	acetylcholine transport	biological_process	1	1	1	1	1	1	1	1	1	1	1	1	1	1	1	1	1	1	1	1	1	1	1	1	1	1	1	1	1	1	1	1	1	1	1	1	1	1	1	1	1	1	1	1	1	1	1
GO:0015914	phospholipid transport	biological_process	1	1	1	1	1	1	1	1	1	1	1	1	1	1	1	1	1	1	1	1	1	1	1	1	1	1	1	1	1	1	1	1	1	1	1	1	1	1	1	1	1	1	1	1	1	1	1
GO:0015923	mannosidase activity	molecular_function	1	1	1	1	1	1	1	1	1	1	1	1	1	1	1	1	1	1	1	1	1	1	1	1	1	1	1	1	1	1	1	1	1	1	1	1	1	1	1	1	1	1	1	1	1	1	1
GO:0015924	mannosyl-oligosaccharide mannosidase activity	molecular_function	1	1	1	1	1	1	1	1	1	1	1	1	1	1	1	1	1	1	1	1	1	1	1	1	1	1	1	1	1	1	1	1	1	1	1	1	1	1	1	1	1	1	1	1	1	1	1
GO:0015926	glucosidase activity	molecular_function	1	1	1	1	1	1	1	1	1	1	1	1	1	1	1	1	1	1	1	1	1	1	1	1	1	1	1	1	1	1	1	1	1	1	1	1	1	1	1	1	1	1	1	1	1	1	1
GO:0015927	trehalase activity	molecular_function	1	1	1	1	1	1	1	1	1	1	1	1	1	1	1	1	1	1	1	1	1	1	1	1	1	1	1	1	1	1	1	1	1	1	1	1	1	1	1	1	1	1	1	1	1	1	1
GO:0015931	nucleobase-containing compound transport	biological_process	1	1	1	1	1	1	1	1	1	1	1	1	1	1	1	1	1	1	1	1	1	1	1	1	1	1	1	1	1	1	1	1	1	1	1	1	1	1	1	1	1	1	1	1	1	1	1
GO:0015932	nucleobase-containing compound transmembrane transporter activity	molecular_function	1	1	1	1	1	1	1	1	1	1	1	1	1	1	1	1	1	1	1	1	1	1	1	1	1	1	1	1	1	1	1	1	1	1	1	1	1	1	1	1	1	1	1	1	1	1	1
GO:0015934	large ribosomal subunit	cellular_component	1	1	1	1	1	1	1	1	1	1	1	1	1	1	1	1	1	1	1	1	1	1	1	1	1	1	1	1	1	1	1	1	1	1	1	1	1	1	1	1	1	1	1	1	1	1	1
GO:0015935	small ribosomal subunit	cellular_component	1	1	1	1	1	1	1	1	1	1	1	1	1	1	1	1	1	1	1	1	1	1	1	1	1	1	1	1	1	1	1	1	1	1	1	1	1	1	1	1	1	1	1	1	1	1	1
GO:0015936	coenzyme A metabolic process	biological_process	1	1	1	1	1	1	1	1	1	1	1	1	1	1	1	1	1	1	1	1	1	1	1	1	1	1	1	1	1	1	1	1	1	1	1	1	1	1	1	1	1	1	1	1	1	1	1
GO:0015980	energy derivation by oxidation of organic compounds	biological_process	1	1	1	1	1	1	1	1	1	1	1	1	1	1	1	1	1	1	1	1	1	1	1	1	1	1	1	1	1	1	1	1	1	1	1	1	1	1	1	1	1	1	1	1	1	1	1
GO:0015985	energy coupled proton transport	down electrochemical gradient	biological_process	1	1	0.00481158	1	1	1	1	1	1	1	1	1	1	1	1	1	1	1	1	1	1	1	1	1	1	1	1	1	1	1	1	1	1	1	1	1	1	1	1	1	1	1	1	1	1	1
GO:0015986	ATP synthesis coupled proton transport	biological_process	1	1	0.00481158	1	1	1	1	1	1	1	1	1	1	1	1	1	1	1	1	1	1	1	1	1	1	1	1	1	1	1	1	1	1	1	1	1	1	1	1	1	1	1	1	1	1	1	1
GO:0015992	proton transport	biological_process	1	1	1	1	1	1	1	1	1	1	1	1	1	1	1	1	1	1	1	1	1	1	1	1	1	1	1	1	1	1	1	1	1	1	1	1	1	1	1	1	1	1	1	1	1	1	1
GO:0016010	dystrophin-associated glycoprotein complex	cellular_component	1	1	1	1	1	1	1	1	1	1	1	1	1	1	1	1	1	1	1	1	1	1	1	1	1	1	1	1	1	1	1	1	1	1	1	1	1	1	1	1	1	1	1	1	1	1	1
GO:0016020	membrane	cellular_component	1	1	1	1	1	1	1	1	1	1	1	1	1	1	1	1	1	1	1	1	1	1	1	1	1	1	2.1792e-05	9.856e-19	2.2688e-53	2.1344e-44	4.64e-07	1	1	1	1	1	1	1	1	1	1	1	1	1	0.00019264	2.2208e-17	1
GO:0016021	integral component of membrane	cellular_component	1	1	1	1	1	1	1	1	1	1	1	1	1	1	1	1	1	1	1	1	1	1	1	1	1	1	3.456e-05	2.2784e-17	1.5168e-58	2.6752e-50	6.624e-07	1	1	1	1	1	1	1	1	1	1	1	1	1	0.00128	1.0784e-16	1
GO:0016023	cytoplasmic membrane-bounded vesicle	cellular_component	1	1	1	1	1	1	1	1	1	1	1	1	1	1	1	1	1	1	1	1	1	1	1	1	1	1	1	1	1	1	1	1	1	1	1	1	1	1	1	1	1	1	1	1	1	1	1
GO:0016042	lipid catabolic process	biological_process	1	1	1	1	1	1	1	1	1	1	1	1	1	1	1	1	1	1	1	1	1	1	1	1	1	1	1	1	1	1	1	1	1	1	1	1	1	1	1	1	1	1	1	1	1	1	1
GO:0016043	cellular component organization	biological_process	1.5296e-07	3.36e-24	3.776e-13	1	1	1	1.8464e-21	1.7184e-11	4.416e-05	2.8512e-08	1	1	1	0.0025088	3.264e-05	1	1	2.1472e-15	8.448e-08	1	1	1	1	1	1	1	1	1	1	1	1	1	7.104e-14	1	1	3.616e-25	3.808e-41	9.376e-31	2.5184e-19	1	1.12e-05	1.9136e-09	4.832e-05	1	1	1	1
GO:0016049	cell growth	biological_process	1	1	1	1	1	1	1	1	1	1	1	1	1	1	0.0016096	1	1	1	1	1	1	1	1	1	1	1	1	1	1	1	1	1	1	1	1	1	1	1	1	1	1	0.0018048	1	1	1	1	1
GO:0016050	vesicle organization	biological_process	1	1	1	1	1	1	1	1	1	1	1	1	1	1	1	1	1	1	1	1	1	1	1	1	1	1	1	1	1	1	1	1	1	1	1	1	1	1	1	1	1	1	1	1	1	1	1
GO:0016051	carbohydrate biosynthetic process	biological_process	1	1	1	1	1	1	1	1	1	1	1	1	1	1	1	1	1	1	1	1	1	1	1	1	1	1	1	0.0023968	1	1	1	1	1	1	1	1	1	1	1	1	1	1	1	1	1	1	1
GO:0016052	carbohydrate catabolic process	biological_process	1	1	1	1	1	1	1	1	1	1	1	1	1	1	1	1	1	1	1	1	1	1	1	1	1	1	1	1	1	1	1	1	1	1	1	1	1	1	1	1	1	1	1	1	1	1	1
GO:0016053	organic acid biosynthetic process	biological_process	1	1	1	1	1	1	1	1	1	1	1	1	1	1	1	1	1	1	1	1	1	1	1	1	1	1	1	1	1	1	1	1	1	1	1	1	1	1	1	1	1	1	1	1	1	1	1
GO:0016054	organic acid catabolic process	biological_process	1	1	1	1	1	1	1	1	1	1	1	1	1	1	1	1	1	1	1	1	1	1	1	1	1	1	1	1	1	1	1	1	1	1	1	1	1	1	1	1	1	1	1	1	1	1	1
GO:0016055	Wnt signaling pathway	biological_process	1	1	1	1	1	1	1	1	1	1	1	1	1	1	1	1	1	0.0005312	1	1	1	1	1	1	1	1	1	1	1	1	1	1	1	1	1	1	1	1	1	1	1	1	1	1	1	1	1
GO:0016070	RNA metabolic process	biological_process	1	1	0.00482099	9.408e-05	1	1	1	0.0010144	1	1	1	1	1	1	1	1	4.608e-08	2.656e-06	0.00470992	1	1.7632e-05	1	1	1	1	1	1	1	1	1	1	1.8752e-06	1	1	1	0.00016	1	1	1	1	0.00072	9.952e-05	1	1	1	1	1
GO:0016071	mRNA metabolic process	biological_process	1	1	0.00610445	0.00939232	1	1	1	1	1	1	1	1	1	1	1	1	1	1	1	1	1	1	1	1	1	1	1	1	1	1	1	1	1	1	1	1	1	1	1	1	1	1	1	1	1	1	1
GO:0016072	rRNA metabolic process	biological_process	1	1	1	1	1	1	1	1	1	1	1	1	1	1	1	1	1	1	1	1	1	1	1	1	1	1	1	1	1	1	1	1	1	1	1	1	1	1	1	1	1	1	1	1	1	1	1
GO:0016079	synaptic vesicle exocytosis	biological_process	1	1	1	1	1	1	1	1	1	1	1	1	1	1	1	1	1	1	1	1	1	1	1	1	1	1	1	1	1	1	1	1	1	1	1	1	1	1	1	1	1	1	1	1	1	1	1
GO:0016125	sterol metabolic process	biological_process	1	1	1	1	1	1	1	1	1	1	1	1	1	1	1	1	1	1	1	1	1	1	1	1	1	1	1	1	1	1	1	1	1	1	1	1	1	1	1	1	1	1	1	1	1	1	1
GO:0016137	glycoside metabolic process	biological_process	1	1	1	1	1	1	1	1	1	1	1	1	1	1	1	1	1	1	1	1	1	1	1	1	1	1	1	1	1	1	1	1	1	1	1	1	1	1	1	1	1	1	1	1	1	1	1
GO:0016192	vesicle-mediated transport	biological_process	1.1872e-05	1.4752e-19	4.256e-08	1	1	1	1.8912e-05	1	0.00567446	1	1	1	1	1	1	1	1	1	1	1	1	1	1	1	1	1	1	1	1	1	1	1	3.0336e-07	1	1	0.0020576	8.768e-05	1	2.8064e-06	1	1	1	1	1	1	1	1
GO:0016197	endosomal transport	biological_process	1	1	1	1	1	1	1	1	1	1	1	1	1	1	1	1	1	1	1	1	1	1	1	1	1	1	1	1	1	1	1	1	1	1	1	1	1	1	1	1	1	1	1	1	1	1	1
GO:0016209	antioxidant activity	molecular_function	1	1	1	1	1	1	1	1	1	1	1	1	1	1	1	1	1	1	1	1	1	1	1	1	1	1	1	1	1	1	1	1	1	1	1	1	1	1	1	1	1	1	1	1	1	1	1
GO:0016211	ammonia ligase activity	molecular_function	1	1	1	1	1	1	1	1	1	1	1	1	1	1	1	1	1	1	1	1	1	1	1	1	1	1	1	1	1	1	1	1	1	1	1	1	1	1	1	1	1	1	1	1	1	1	1
GO:0016215	acyl-CoA desaturase activity	molecular_function	1	1	1	1	1	1	1	1	1	1	1	1	1	1	1	1	1	1	1	1	1	1	1	1	1	1	1	1	1	1	1	1	1	1	1	1	1	1	1	1	1	1	1	1	1	1	1
GO:0016226	iron-sulfur cluster assembly	biological_process	1	1	1	1	1	1	1	1	1	1	1	1	1	1	1	1	1	1	1	1	1	1	1	1	1	1	1	1	1	1	1	1	1	1	1	1	1	1	1	1	1	1	1	1	1	1	1
GO:0016229	steroid dehydrogenase activity	molecular_function	1	1	1	1	1	1	1	1	1	1	1	1	1	1	1	1	1	1	1	1	1	1	1	1	1	1	1	1	1	1	1	1	1	1	1	1	1	1	1	1	1	1	1	1	1	1	1
GO:0016246	RNA interference	biological_process	1	1.5104e-06	6.56e-05	1	1	1	1	1	1	1	1	1	1	1	1	1	1	1	1	1	1	1	1	1	1	1	1	1	1	1	1	1	1	1	1	1	1	1	1	1	1	1	1	1	1	1	1
GO:0016247	channel regulator activity	molecular_function	1	1	1	1	1	1	1	1	1	1	1	1	1	1	1	1	1	1	1	1	1	1	1	1	1	1	1	1	1	1	1	1	1	1	1	1	1	1	1	1	1	1	1	1	1	1	1
GO:0016251	obsolete general RNA polymerase II transcription factor activity	molecular_function	1	1	1	1	1	1	1	1	1	1	1	1	1	1	1	1	1	1	1	1	1	1	1	1	1	1	1	1	1	1	1	1	1	1	1	1	1	1	1	1	1	1	1	1	1	1	1
GO:0016265	death	biological_process	1	1	1	1	1	1	1	1	1	1	1	1	1	1	1	1	1	1	1	1	1	1	1	1	1	1	1	1	1	1	1	0.00446214	0.00010976	1	1	0.00740083	1	0.00426429	1	1	1	1	1	1	1	1	1
GO:0016272	prefoldin complex	cellular_component	1	1	1	1	1	1	1	1	1	1	1	1	1	1	1	1	1	1	1	1	1	1	1	1	1	1	1	1	1	1	1	1	1	1	1	1	1	1	1	1	1	1	1	1	1	1	1
GO:0016278	lysine N-methyltransferase activity	molecular_function	1	1	1	1	1	1	1	1	1	1	1	1	1	1	1	1	1	1	1	1	1	1	1	1	1	1	1	1	1	1	1	1	1	1	1	1	1	1	1	1	1	1	1	1	1	1	1
GO:0016279	protein-lysine N-methyltransferase activity	molecular_function	1	1	1	1	1	1	1	1	1	1	1	1	1	1	1	1	1	1	1	1	1	1	1	1	1	1	1	1	1	1	1	1	1	1	1	1	1	1	1	1	1	1	1	1	1	1	1
GO:0016289	CoA hydrolase activity	molecular_function	1	1	1	1	1	1	1	1	1	1	1	1	1	1	1	1	1	1	1	1	1	1	1	1	1	1	1	1	1	1	1	1	1	1	1	1	1	1	1	1	1	1	1	1	1	1	1
GO:0016298	lipase activity	molecular_function	1	1	1	1	1	1	1	1	1	1	1	1	1	1	1	1	1	1	1	1	1	1	1	1	1	1	1	1	1	1	1	1	1	1	1	1	1	1	1	1	1	1	1	1	1	1	1
GO:0016301	kinase activity	molecular_function	1	1	1	1	1	1	1	1	1	1	1	1	1	1	1	1	1	1	1	1	1	1	1	1	1	1	1	1	1	1	1	1	0.00630035	1	1	1	1	1	1	1	1	1	1	1	1	1	1
GO:0016303	1-phosphatidylinositol-3-kinase activity	molecular_function	1	1	1	1	1	1	1	1	1	1	1	1	1	1	1	1	1	1	1	1	1	1	1	1	1	1	1	1	1	1	1	1	1	1	1	1	1	1	1	1	1	1	1	1	1	1	1
GO:0016310	phosphorylation	biological_process	1	1	1	1	1	1	1	1	1	1	1	1	1	1	1	1	1	1	1	1	1	1	1	1	1	1	1	1	1	1	1	1	1	1	1	1	1	1	1	1	1	1	1	1	1	1	1
GO:0016311	dephosphorylation	biological_process	1	1	1	1	1	1	1	1	1	1	1	1	1	1	1	1	1	1	1	1	1	1	1	1	1	1	1	1	1	1	1	1	1	1	1	1	1	1	1	1	1	1	1	1	1	1	1
GO:0016323	basolateral plasma membrane	cellular_component	1	1	1	1	1	1	1	1	1	1	1	1	1	1	1	1	1	1	1	1	1	1	1	1	1	1	1	1	1	1	1	1	1	1	1	1	1	1	1	1	1	1	1	1	1	1	1
GO:0016324	apical plasma membrane	cellular_component	1	1	1	1	1	1	1	1	1	1	1	1	1	1	1	1	1	1	1	1	1	1	1	1	1	1	1	1	1	1	1	1	1	1	1	1	1	1	1	1	1	1	1	0.0006976	1	1	1
GO:0016327	apicolateral plasma membrane	cellular_component	1	1	1	1	1	1	1	1	1	1	1	1	1	1	1	1	1	1	1	1	1	1	1	1	1	1	1	1	1	1	1	1	1	1	1	1	1	1	1	1	1	1	0.00104	1	1	1	1
GO:0016331	morphogenesis of embryonic epithelium	biological_process	1	1	1	1	1	1	1	1	1	1	1	1	1	1	1	1	1	1	1	1	1	1	1	1	1	1	1	1	1	1	1	1	1	1	1	1	1	1	1	1	1	1	1	1	1	1	1
GO:0016337	single organismal cell-cell adhesion	biological_process	1	1	1	1	1	1	1	1	1	1	1	1	1	1	4.608e-08	1	1	1	1	1	1	1	1	1	1	1	1	1	1	1	1	1	1	1	1	1	1	1	2.608e-06	3.488e-05	1	1	1	0.00012032	1	1	1
GO:0016344	meiotic chromosome movement towards spindle pole	biological_process	1	1	1	1	1	1	1	1	1	1	1	1	1	1	1	1	1	1	1	1	1	1	1	1	1	1	1	1	1	1	1	1	1	1	1	1	1	1	1	1	1	1	1	1	1	1	1
GO:0016405	CoA-ligase activity	molecular_function	1	1	1	1	1	1	1	1	1	1	1	1	1	1	1	1	1	1	1	1	1	1	1	1	1	1	1	1	1	1	1	1	1	1	1	1	1	1	1	1	1	1	1	1	1	1	1
GO:0016407	acetyltransferase activity	molecular_function	1	1	1	1	1	1	1	1	1	1	1	1	1	1	1	1	1	1	1	1	1	1	1	1	1	1	1	1	1	1	1	1	1	1	1	1	1	1	1	1	1	1	1	1	1	1	1
GO:0016410	N-acyltransferase activity	molecular_function	1	1	1	1	1	1	1	1	1	1	1	1	1	1	1	1	1	1	1	1	1	1	1	1	1	1	1	1	1	1	1	1	1	1	1	1	1	1	1	1	1	1	1	1	1	1	1
GO:0016423	tRNA (guanine) methyltransferase activity	molecular_function	1	1	1	1	1	1	1	1	1	1	1	1	1	1	1	1	1	1	1	1	1	1	1	1	1	1	1	1	1	1	1	1	1	1	1	1	1	1	1	1	1	1	1	1	1	1	1
GO:0016441	posttranscriptional gene silencing	biological_process	1	5.216e-07	1.4272e-05	1	1	1	1	1	1	1	1	1	1	1	1	1	1	1	1	1	1	1	1	1	1	1	1	1	1	1	1	1	0.00755539	1	1	1	1	1	1	1	1	1	1	1	1	1	1
GO:0016458	gene silencing	biological_process	1	7.616e-07	4.096e-05	1	1	1	1	1	1	1	1	1	1	1	1	1	1	1	1	1	1	1	1	1	1	1	1	1	1	1	1	1	0.005512	1	1	1	1	1	1	1	1	1	1	1	1	1	1
GO:0016459	myosin complex	cellular_component	1	1	1	1	1	1	1	1	1	1	1	1	1	1	1	1	1	1	1	1	1	1	1	1	1	1	1	0.0007488	1	1	0.00708739	1	1	1	1	1	1	1	1	1	1	1	0.00363517	0.00021088	3.296e-06	0.00584218	1
GO:0016460	myosin II complex	cellular_component	1	1	1	1	1	1	1	1	1	1	1	1	1	1	1	1	1	1	1	1	1	1	1	1	1	1	1	1	1	1	1	1	1	1	1	1	1	1	1	1	1	1	1	1	0.0016672	1	1
GO:0016462	pyrophosphatase activity	molecular_function	0.0003296	3.84e-07	1.3856e-08	1	1	1	1	1	1	1	1	1	1	1	1	1	1	1	1	1	1	1	1	1	1	1	1	1	1	1	1	1	0.0024128	1	1	1	1	1	7.68e-08	1	1	1	1	1	1	1	1
GO:0016469	proton-transporting two-sector ATPase complex	cellular_component	1	1	0.0022432	1	1	1	1	1	1	1	1	1	1	1	1	1	1	1	1	1	1	1	1	1	1	1	1	1	1	1	1	1	1	1	1	1	1	1	1	1	1	1	1	1	1	1	1
GO:0016471	vacuolar proton-transporting V-type ATPase complex	cellular_component	1	1	1	1	1	1	1	1	1	1	1	1	1	1	1	1	1	1	1	1	1	1	1	1	1	1	1	1	1	1	1	1	1	1	1	1	1	1	1	1	1	1	1	1	1	1	1
GO:0016477	cell migration	biological_process	1	1	1	1	1	1	1	1	0.0015584	1	1	1	1	1	0.00406419	1	1	5.152e-07	3.584e-10	1	1	0.00680067	1	1	1	1	1	1	1	1	1	1	1	1	1	1	1	1	6.272e-10	1	0.00388154	4.096e-14	1	1	1	1	1
GO:0016485	protein processing	biological_process	1	1	1	1	1	1	1	1	1	1	1	1	1	1	1	1	1	1	1	1	1	1	1	1	1	1	1	1	1	1	1	1	1	1	1	1	1	1	1	1	1	1	1	1	1	1	1
GO:0016491	oxidoreductase activity	molecular_function	1	1	0.0009664	1	1	1	1	1	1	1	2.3328e-05	1	1	1	1	1	1	1	1	1	1	1	1	1	1	1	1	1	1	1	1	0.0046569	1	1	1	1	1	1	1	1	3.1584e-05	1	1	1	1	1	1
GO:0016538	cyclin-dependent protein serine/threonine kinase regulator activity	molecular_function	1	1	1	1	1	1	1	1	1	1	1	1	1	1	1	1	1	1	1	1	1	1	1	1	1	1	1	1	1	1	1	1	1	1	1	1	1	1	1	1	1	1	1	1	1	1	1
GO:0016563	obsolete transcription activator activity	molecular_function	1	1	1	1	1	1	1	1	1	1	1	1	1	1	1	1	1	1	1	1	1	1	1	1	1	1	1	1	1	1	1	1	1	1	1	1	1	1	1	1	1	1	1	1	1	1	1
GO:0016564	obsolete transcription repressor activity	molecular_function	1	1	1	1	1	1	1	1	1	1	1	1	1	1	1	1	1	1	1	1	1	1	1	1	1	1	1	1	1	1	1	1	1	1	1	1	1	1	1	1	1	1	1	1	1	1	1
GO:0016567	protein ubiquitination	biological_process	1	0.00024384	0.0006592	1	1	1	1	1	1	1	1	1	1	1	1	1	1	1	1	1	1	1	1	1	1	1	1	1	1	1	1	1	1	1	1	1	1	1	1	1	1	1	1	1	1	1	1
GO:0016568	chromatin modification	biological_process	1	1	1	1	1	1	1	1	1	1	1	1	1	1	1	1	1	1	1	1	1	1	1	1	1	1	1	1	1	1	1	1	1	1	1	1	1	1	1	1	1	1	1	1	1	1	1
GO:0016569	covalent chromatin modification	biological_process	1	1	1	1	1	1	1	1	1	1	1	1	1	1	1	1	1	1	1	1	1	1	1	1	1	1	1	1	1	1	1	1	1	1	1	1	1	1	1	1	1	1	1	1	1	1	1
GO:0016570	histone modification	biological_process	1	1	1	1	1	1	1	1	1	1	1	1	1	1	1	1	1	1	1	1	1	1	1	1	1	1	1	1	1	1	1	1	1	1	1	1	1	1	1	1	1	1	1	1	1	1	1
GO:0016571	histone methylation	biological_process	1	1	1	1	1	1	1	1	1	1	1	1	1	1	1	1	1	1	1	1	1	1	1	1	1	1	1	1	1	1	1	1	1	1	1	1	1	1	1	1	1	1	1	1	1	1	1
GO:0016575	histone deacetylation	biological_process	1	1	1	1	1	1	1	1	1	1	1	1	1	1	1	1	1	1	1	1	1	1	1	1	1	1	1	1	1	1	1	1	1	1	1	1	1	1	1	1	1	1	1	1	1	1	1
GO:0016585	obsolete chromatin remodeling complex	cellular_component	1	1	1	1	1	1	1	1	1	1	1	1	1	1	1	1	1	1	1	1	1	1	1	1	1	1	1	1	1	1	1	1	1	1	1	1	1	1	1	1	1	1	1	1	1	1	1
GO:0016591	DNA-directed RNA polymerase II	holoenzyme	cellular_component	1	1	0.00412896	1	1	1	1	1	1	1	1	1	1	1	1	1	1	1	1	1	1	1	1	1	1	1	1	1	1	1	1	1	1	1	1	1	1	1	1	1	1	1	1	1	1	1
GO:0016592	mediator complex	cellular_component	1	1	1	1	1	1	1	1	1	1	1	1	1	1	1	1	1	1	1	1	1	1	1	1	1	1	1	1	1	1	1	1	1	1	1	1	1	1	1	1	1	1	1	1	1	1	1
GO:0016597	amino acid binding	molecular_function	1	1	1	1	1	1	1	1	1	1	1	1	1	1	1	1	1	1	1	1	1	1	1	1	1	1	1	1	1	1	1	1	1	1	1	1	1	1	1	1	1	1	1	1	1	1	1
GO:0016604	nuclear body	cellular_component	1	1	1	1	1	1	1	1	1	1	1	1	1	1	1	1	1	1	1	1	1	1	1	1	1	1	1	1	1	1	1	1	1	1	1	1	1	1	1	1	1	1	1	1	1	1	1
GO:0016607	nuclear speck	cellular_component	1	1	1	1	1	1	1	1	1	1	1	1	1	1	1	1	1	1	1	1	1	1	1	1	1	1	1	1	1	1	1	1	1	1	1	1	1	1	1	1	1	1	1	1	1	1	1
GO:0016614	oxidoreductase activity	acting on CH-OH group of donors	molecular_function	1	1	1	1	1	1	1	1	1	1	1	1	1	1	1	1	1	1	1	1	1	1	1	1	1	1	1	1	1	1	1	1	1	1	1	1	1	1	1	1	1	1	1	1	1	1
GO:0016616	oxidoreductase activity	acting on the CH-OH group of donors	NAD or NADP as acceptor	molecular_function	1	1	1	1	1	1	1	1	1	1	1	1	1	1	1	1	1	1	1	1	1	1	1	1	1	1	1	1	1	1	1	1	1	1	1	1	1	1	1	1	1	1	1	1	1
GO:0016620	oxidoreductase activity	acting on the aldehyde or oxo group of donors	NAD or NADP as acceptor	molecular_function	1	1	1	1	1	1	1	1	1	1	1	1	1	1	1	1	1	1	1	1	1	1	1	1	1	1	1	1	1	1	1	1	1	1	1	1	1	1	1	1	1	1	1	1	1
GO:0016624	oxidoreductase activity	acting on the aldehyde or oxo group of donors	disulfide as acceptor	molecular_function	0.00818074	1	1	1	1	1	1	1	1	1	1	1	1	1	1	1	1	1	1	1	1	1	1	1	1	1	1	1	1	1	1	1	1	1	1	1	1	1	1	1	1	1	1	1	1
GO:0016627	oxidoreductase activity	acting on the CH-CH group of donors	molecular_function	1	1	1	1	1	1	1	1	1	1	1	1	1	1	1	1	1	1	1	1	1	1	1	1	1	1	1	1	1	1	1	1	1	1	1	1	1	1	1	1	1	1	1	1	1	1
GO:0016628	oxidoreductase activity	acting on the CH-CH group of donors	NAD or NADP as acceptor	molecular_function	1	1	1	1	1	1	1	1	1	1	1	1	1	1	1	1	1	1	1	1	1	1	1	1	1	1	1	1	1	1	1	1	1	1	1	1	1	1	1	1	1	1	1	1	1
GO:0016634	oxidoreductase activity	acting on the CH-CH group of donors	oxygen as acceptor	molecular_function	1	1	1	1	1	1	1	1	1	1	1	1	1	1	1	1	1	1	1	1	1	1	1	1	1	1	1	1	1	1	1	1	1	1	1	1	1	1	1	1	1	1	1	1	1
GO:0016638	oxidoreductase activity	acting on the CH-NH2 group of donors	molecular_function	1	1	1	1	1	1	1	1	1	1	1	1	1	1	1	1	1	1	1	1	1	1	1	1	1	1	1	1	1	1	1	1	1	1	1	1	1	1	1	1	1	1	1	1	1	1
GO:0016641	oxidoreductase activity	acting on the CH-NH2 group of donors	oxygen as acceptor	molecular_function	1	1	1	1	1	1	1	1	1	1	1	1	1	1	1	1	1	1	1	1	1	1	1	1	1	1	1	1	1	1	1	1	1	1	1	1	1	1	1	1	1	1	1	1	1
GO:0016645	oxidoreductase activity	acting on the CH-NH group of donors	molecular_function	1	1	1	1	1	1	1	1	1	1	1	1	1	1	1	1	1	1	1	1	1	1	1	1	1	1	1	1	1	1	1	1	1	1	1	1	1	1	1	1	1	1	1	1	1	1
GO:0016646	oxidoreductase activity	acting on the CH-NH group of donors	NAD or NADP as acceptor	molecular_function	1	1	1	1	1	1	1	1	1	1	1	1	1	1	1	1	1	1	1	1	1	1	1	1	1	1	1	1	1	1	1	1	1	1	1	1	1	1	1	1	1	1	1	1	1
GO:0016651	oxidoreductase activity	acting on NAD(P)H	molecular_function	1	1	1	1	1	1	1	1	1	1	1	1	1	1	1	1	1	1	1	1	1	1	1	1	1	1	1	1	1	1	1	1	1	1	1	1	1	1	1	1	1	1	1	1	1	1
GO:0016655	oxidoreductase activity	acting on NAD(P)H	quinone or similar compound as acceptor	molecular_function	1	1	1	1	1	1	1	1	1	1	1	1	1	1	1	1	1	1	1	1	1	1	1	1	1	1	1	1	1	1	1	1	1	1	1	1	1	1	1	1	0.0044119	1	1	1	1
GO:0016667	oxidoreductase activity	acting on a sulfur group of donors	molecular_function	1	1	1	1	1	1	1	1	1	1	1	1	1	1	1	1	1	1	1	1	1	1	1	1	1	1	1	1	1	1	1	1	1	1	1	1	1	1	1	1	1	1	1	1	1	1
GO:0016675	oxidoreductase activity	acting on a heme group of donors	molecular_function	1	1	1	1	1	1	1	1	1	1	1	1	1	1	1	1	1	1	1	1	1	1	1	1	1	1	1	1	1	1	1	1	1	0.00341264	0.00336803	1	1	1	1	1	1	1	1	1	1	1
GO:0016676	oxidoreductase activity	acting on a heme group of donors	oxygen as acceptor	molecular_function	1	1	1	1	1	1	1	1	1	1	1	1	1	1	1	1	1	1	1	1	1	1	1	1	1	1	1	1	1	1	1	1	1	0.00341264	0.00336803	1	1	1	1	1	1	1	1	1	1
GO:0016679	oxidoreductase activity	acting on diphenols and related substances as donors	molecular_function	1	1	1	1	1	1	1	1	1	1	1	1	1	1	1	1	1	1	1	1	1	1	1	1	1	1	1	1	1	1	1	1	1	1	1	1	1	1	1	1	1	1	1	1	1	1
GO:0016681	oxidoreductase activity	acting on diphenols and related substances as donors	cytochrome as acceptor	molecular_function	1	1	1	1	1	1	1	1	1	1	1	1	1	1	1	1	1	1	1	1	1	1	1	1	1	1	1	1	1	1	1	1	1	1	1	1	1	1	1	1	1	1	1	1	1
GO:0016684	oxidoreductase activity	acting on peroxide as acceptor	molecular_function	1	1	1	1	1	1	1	1	1	1	1	1	1	1	1	1	1	1	1	1	1	1	1	1	1	1	1	1	1	1	1	1	1	1	1	1	1	1	1	1	1	1	1	1	1	1
GO:0016701	oxidoreductase activity	acting on single donors with incorporation of molecular oxygen	molecular_function	1	1	1	1	1	1	1	1	1	1	0.0091881	1	1	1	1	1	1	1	1	1	1	1	1	1	1	1	1	1	1	1	1	1	1	1	1	1	1	1	1	1	0.0016896	1	1	1	1	1
GO:0016702	oxidoreductase activity	acting on single donors with incorporation of molecular oxygen	incorporation of two atoms of oxygen	molecular_function	1	1	1	1	1	1	1	1	1	1	0.0039441	1	1	1	1	1	1	1	1	1	1	1	1	1	1	1	1	1	1	1	1	1	1	1	1	1	1	1	1	1	0.00015136	1	1	1	1
GO:0016705	oxidoreductase activity	acting on paired donors	with incorporation or reduction of molecular oxygen	molecular_function	1	1	1	1	1	1	1	1	1	1	0.0027744	1	1	1	1	1	1	1	1	1	1	1	1	1	1	1	1	1	1	1	1	1	1	1	1	1	1	1	1	1	1	1	1	1	1
GO:0016706	oxidoreductase activity	acting on paired donors	with incorporation or reduction of molecular oxygen	2-oxoglutarate as one donor	and incorporation of one atom each of oxygen into both donors	molecular_function	1	1	1	1	1	1	1	1	1	1	0.0039441	1	1	1	1	1	1	1	1	1	1	1	1	1	1	1	1	1	1	1	1	1	1	1	1	1	1	1	1	1	0.0027136	1	1
GO:0016709	oxidoreductase activity	acting on paired donors	with incorporation or reduction of molecular oxygen	NAD(P)H as one donor	and incorporation of one atom of oxygen	molecular_function	1	1	1	1	1	1	1	1	1	1	1	1	1	1	1	1	1	1	1	1	1	1	1	1	1	1	1	1	1	1	1	1	1	1	1	1	1	1	1	1	1	1	1
GO:0016717	oxidoreductase activity	acting on paired donors	with oxidation of a pair of donors resulting in the reduction of molecular oxygen to two molecules of water	molecular_function	1	1	1	1	1	1	1	1	1	1	1	1	1	1	1	1	1	1	1	1	1	1	1	1	1	1	1	1	1	1	1	1	1	1	1	1	1	1	1	1	1	1	1	1	1
GO:0016725	oxidoreductase activity	acting on CH or CH2 groups	molecular_function	1	1	1	1	1	1	1	1	1	1	1	1	1	1	1	1	1	1	1	1	1	1	1	1	1	1	1	1	1	1	1	1	1	1	1	1	1	1	1	1	1	1	1	1	1	1
GO:0016728	oxidoreductase activity	acting on CH or CH2 groups	disulfide as acceptor	molecular_function	1	1	1	1	1	1	1	1	1	1	1	1	1	1	1	1	1	1	1	1	1	1	1	1	1	1	1	1	1	1	1	1	1	1	1	1	1	1	1	1	1	1	1	1	1
GO:0016740	transferase activity	molecular_function	1	0.0003392	1	1	1	1	1	1	1	1	1	1	1	1	1	1	1	1	1	1	1	1	1	1	1	1	1	1	1	1	1	1	0.0003264	1	1	1	1	1	1	1	1	1	1	1	1	1	1
GO:0016741	transferase activity	transferring one-carbon groups	molecular_function	1	1	1	1	1	1	1	1	1	1	1	1	1	1	1	1	1	1	1	1	1	1	1	1	1	1	1	1	1	1	1	1	1	1	1	1	1	1	1	1	1	1	1	1	1	1
GO:0016746	transferase activity	transferring acyl groups	molecular_function	1	1	1	1	1	1	1	1	1	1	1	1	1	1	1	1	1	1	1	1	1	1	1	1	1	1	1	1	1	1	1	1	1	1	1	1	1	1	1	1	1	1	1	1	1	1
GO:0016747	transferase activity	transferring acyl groups other than amino-acyl groups	molecular_function	1	1	1	1	1	1	1	1	1	1	1	1	1	1	1	1	1	1	1	1	1	1	1	1	1	1	1	1	1	1	1	1	1	1	1	1	1	1	1	1	1	1	1	1	1	1
GO:0016755	transferase activity	transferring amino-acyl groups	molecular_function	1	1	1	1	1	1	1	1	1	1	1	1	1	1	1	1	1	1	1	1	1	1	1	1	1	1	1	1	1	1	1	1	1	1	1	1	1	1	1	1	1	1	1	1	1	1
GO:0016757	transferase activity	transferring glycosyl groups	molecular_function	1	1	1	1	1	1	1	1	1	1	1	1	1	1	1	1	1	1	1	1	1	1	1	1	1	1	1	1	1	1	1	1	1	1	1	1	1	1	1	1	1	1	1	1	1	1
GO:0016758	transferase activity	transferring hexosyl groups	molecular_function	1	1	1	1	1	1	1	1	1	1	1	1	1	1	1	1	1	1	1	1	1	1	1	1	1	1	1	1	1	1	1	1	1	1	1	1	1	1	1	1	1	1	1	1	1	1
GO:0016763	transferase activity	transferring pentosyl groups	molecular_function	1	1	1	1	1	1	1	1	1	1	1	1	1	1	1	1	1	1	1	1	1	1	1	1	1	1	1	1	1	1	1	1	1	1	1	1	1	1	1	1	1	1	1	1	1	1
GO:0016765	transferase activity	transferring alkyl or aryl (other than methyl) groups	molecular_function	1	1	1	1	1	1	1	1	1	1	1	1	1	1	1	1	1	1	1	1	1	1	1	1	1	1	1	1	1	1	1	1	1	1	1	1	1	1	1	1	1	1	1	1	1	1
GO:0016769	transferase activity	transferring nitrogenous groups	molecular_function	1	1	1	1	1	1	1	1	1	1	1	1	1	1	1	1	1	1	1	1	1	1	1	1	1	1	1	1	1	1	1	1	1	1	1	1	1	1	1	1	1	1	1	1	1	1
GO:0016772	transferase activity	transferring phosphorus-containing groups	molecular_function	1	1	1	1	1	1	1	1	1	1	1	1	1	1	1	1	1	1	1	1	1	1	1	1	1	1	1	1	1	1	1	1	0.00088	1	1	1	1	1	1	1	1	1	1	1	1	1
GO:0016773	phosphotransferase activity	alcohol group as acceptor	molecular_function	1	1	1	1	1	1	1	1	1	1	1	1	1	1	1	1	1	1	1	1	1	1	1	1	1	1	1	1	1	1	1	1	1	1	1	1	1	1	0.0030176	1	1	1	1	1	1	1
GO:0016776	phosphotransferase activity	phosphate group as acceptor	molecular_function	1	1	1	1	1	1	1	1	1	1	1	1	1	1	1	1	1	1	1	1	1	1	1	1	1	1	1	1	1	1	1	1	1	1	1	1	1	1	1	1	1	1	1	1	1	1
GO:0016779	nucleotidyltransferase activity	molecular_function	1	9.312e-05	1	1	1	1	1	1	1	1	1	1	1	1	1	1	1	1	1	1	1	1	1	1	1	1	1	1	1	1	1	1	1	1	1	1	1	1	1	1	1	1	1	1	1	1	1
GO:0016780	phosphotransferase activity	for other substituted phosphate groups	molecular_function	1	1	1	1	1	1	1	1	1	1	1	1	1	1	1	1	1	1	1	1	1	1	1	1	1	1	1	1	1	1	1	1	1	1	1	1	1	1	1	1	1	1	1	1	1	1
GO:0016782	transferase activity	transferring sulfur-containing groups	molecular_function	1	1	1	1	1	1	1	1	1	1	1	1	1	1	1	1	1	1	1	1	1	1	1	1	1	1	1	1	1.3728e-05	1	1	1	1	1	1	1	1	1	1	1	1	1	1	1	1	1
GO:0016783	sulfurtransferase activity	molecular_function	1	1	1	1	1	1	1	1	1	1	1	1	1	1	1	1	1	1	1	1	1	1	1	1	1	1	1	1	1	1	1	1	1	1	1	1	1	1	1	1	1	1	1	1	1	1	1
GO:0016787	hydrolase activity	molecular_function	0.0061839	1.696e-06	1.152e-06	1	1	1	1	1	1	1	1	1	1	1	1	1	1	1	1	1	1	1	1	1	1	1	1	1	1	1	1	1	2.8864e-05	1	1	1	1	1	1	1	1	1	1	1	1	1	1
GO:0016788	hydrolase activity	acting on ester bonds	molecular_function	1	0.0001632	1	1	1	1	1	1	1	1	1	1	1	1	1	1	1	1	1	1	1	1	1	1	1	1	1	1	1	1	1	1	0.0015488	1	1	1	1	1	1	1	1	1	1	1	1	1
GO:0016790	thiolester hydrolase activity	molecular_function	1	1	1	1	1	1	1	1	1	1	1	1	1	1	1	1	1	1	1	1	1	1	1	1	1	1	1	1	1	1	1	1	1	1	1	1	1	1	1	1	1	1	1	1	1	1	1
GO:0016791	phosphatase activity	molecular_function	1	1	1	1	1	1	1	1	1	1	1	1	1	1	1	1	1	1	1	1	1	1	1	1	1	1	1	1	1	1	1	1	1	1	1	1	1	1	1	1	1	1	1	1	1	1	1
GO:0016796	exonuclease activity	active with either ribo- or deoxyribonucleic acids and producing 5'-phosphomonoesters	molecular_function	1	1	1	1	1	1	1	1	1	1	1	1	1	1	1	1	1	1	1	1	1	1	1	1	1	1	1	1	1	1	1	1	1	1	1	1	1	1	1	1	1	1	1	1	1	1
GO:0016798	hydrolase activity	acting on glycosyl bonds	molecular_function	1	1	1	1	1	1	1	1	1	1	1	1	1	1	1	1	1	1	1	1	1	1	1	1	1	1	1	1	1	1	1	1	1	1	1	1	1	1	1	1	1	1	1	1	1	1
GO:0016810	hydrolase activity	acting on carbon-nitrogen (but not peptide) bonds	molecular_function	1	1	1	1	1	0.00995971	1	1	1	1	1	1	1	1	1	1	1	1	1	1	1	1	1	1	1	1	1	1	1	1	1	0.0004192	1	1	1	1	1	1	1	1	1	1	1	1	1	1
GO:0016811	hydrolase activity	acting on carbon-nitrogen (but not peptide) bonds	in linear amides	molecular_function	1	1	1	1	1	1	1	1	1	1	1	1	1	1	1	1	1	1	1	1	1	1	1	1	1	1	1	1	1	1	1	1	1	1	1	1	1	1	1	1	1	1	1	1	1
GO:0016812	hydrolase activity	acting on carbon-nitrogen (but not peptide) bonds	in cyclic amides	molecular_function	1	1	1	1	1	1	1	1	1	1	1	1	1	1	1	1	1	1	1	1	1	1	1	1	1	1	1	1	1	1	1	1	1	1	1	1	1	1	1	1	1	1	1	1	1
GO:0016814	hydrolase activity	acting on carbon-nitrogen (but not peptide) bonds	in cyclic amidines	molecular_function	1	1	1	1	1	1	1	1	1	1	1	1	1	1	1	1	1	1	1	1	1	1	1	1	1	1	1	1	1	1	1	1	1	1	1	1	1	1	1	1	1	1	1	1	1
GO:0016817	hydrolase activity	acting on acid anhydrides	molecular_function	0.0004448	6.368e-07	2.1568e-08	1	1	1	1	1	1	1	1	1	1	1	1	1	1	1	1	1	1	1	1	1	1	1	1	1	1	1	1	1	0.0016192	1	1	1	1	1	1.0464e-07	1	1	1	1	1	1	1
GO:0016818	hydrolase activity	acting on acid anhydrides	in phosphorus-containing anhydrides	molecular_function	0.0003552	4.384e-07	1.5488e-08	1	1	1	1	1	1	1	1	1	1	1	1	1	1	1	1	1	1	1	1	1	1	1	1	1	1	1	1	1	0.0025696	1	1	1	1	1	8.32e-08	1	1	1	1	1	1
GO:0016820	hydrolase activity	acting on acid anhydrides	catalyzing transmembrane movement of substances	molecular_function	1	1	1	1	1	1	1	1	1	1	1	1	1	1	1	1	1	1	1	1	1	1	1	1	1	1	1	1	1	1	0.00899402	1	0.00341779	1	1	1	1	1	1	1	1	1	1	1	1
GO:0016829	lyase activity	molecular_function	1	1	1	1	1	1	1	1	1	1	1	1	1	1	1	1	1	1	1	1	1	1	1	1	1	1	6.016e-06	8.608e-08	1	1	1	1	1	1	1	1	1	1	1	1	1	1	1	1	1	1	1
GO:0016830	carbon-carbon lyase activity	molecular_function	1	1	1	1	1	1	1	1	1	1	1	1	1	1	1	1	1	1	1	1	1	1	1	1	1	1	1	1	1	1	1	1	1	1	1	1	1	1	1	1	1	1	1	1	1	1	1
GO:0016831	carboxy-lyase activity	molecular_function	1	1	1	1	1	1	1	1	1	1	1	1	1	1	1	1	1	1	1	1	1	1	1	1	1	1	1	1	1	1	1	1	1	1	1	1	1	1	1	1	1	1	1	1	1	1	1
GO:0016835	carbon-oxygen lyase activity	molecular_function	1	1	1	1	1	1	1	1	1	1	1	1	1	1	1	1	1	1	1	1	1	1	1	1	1	1	1	1	1	1	1	1	1	1	1	1	1	1	1	1	1	1	1	1	1	1	1
GO:0016836	hydro-lyase activity	molecular_function	1	1	1	1	1	1	1	1	1	1	1	1	1	1	1	1	1	1	1	1	1	1	1	1	1	1	1	1	1	1	1	1	1	1	1	1	1	1	1	1	1	1	1	1	1	1	1
GO:0016840	carbon-nitrogen lyase activity	molecular_function	1	1	1	1	1	1	1	1	1	1	1	1	1	1	1	1	1	1	1	1	1	1	1	1	1	1	1	1	1	1	1	1	1	1	1	1	1	1	1	1	1	1	1	1	1	1	1
GO:0016846	carbon-sulfur lyase activity	molecular_function	1	1	1	1	1	1	1	1	1	1	1	1	1	1	1	1	1	1	1	1	1	1	1	1	1	1	1	1	1	1	1	1	1	1	1	1	1	1	1	1	1	1	1	1	1	1	1
GO:0016847	1-aminocyclopropane-1-carboxylate synthase activity	molecular_function	1	1	1	1	1	1	1	1	1	1	1	1	1	1	1	1	1	1	1	1	1	1	1	1	1	1	1	1	1	1	1	1	1	1	1	1	1	1	1	1	1	1	1	1	1	1	1
GO:0016849	phosphorus-oxygen lyase activity	molecular_function	1	1	1	1	1	1	1	1	1	1	1	1	1	1	1	1	1	1	1	1	1	1	1	1	1	1	1.6384e-05	4.992e-12	1	1	1	1	1	1	1	1	1	1	1	1	1	1	1	1	1	1	1
GO:0016851	magnesium chelatase activity	molecular_function	1	1	1	1	1	1	1	1	1	1	1	1	1	1	1	1	1	1	1	1	1	1	1	1	1	1	1	1	1	1	1	1	1	1	0.0009152	2.16e-06	3.36e-05	1	1	1	1	1	1	1	1	1	1
GO:0016853	isomerase activity	molecular_function	1	1	1	1	1	1	1	1	1	1	1	1	1	1	1	1	1	1	1	1	1	1	1	1	1	1	1	1	1	1	1	1	1	1	1	1	1	1	1	1	1	1	1	1	1	1	1
GO:0016854	racemase and epimerase activity	molecular_function	1	1	1	1	1	1	1	1	1	1	1	1	1	1	1	1	1	1	1	1	1	1	1	1	1	1	1	1	1	1	1	1	1	1	1	1	1	1	1	1	1	1	1	1	1	1	1
GO:0016859	cis-trans isomerase activity	molecular_function	1	1	1	1	1	1	1	1	1	1	1	1	1	1	1	1	1	1	1	1	1	1	1	1	1	1	1	1	1	1	1	1	1	1	1	1	1	1	1	1	1	1	1	1	1	1	1
GO:0016860	intramolecular oxidoreductase activity	molecular_function	1	1	1	1	1	1	1	1	1	1	1	1	1	1	1	1	1	1	1	1	1	1	1	1	1	1	1	1	1	1	1	1	1	1	1	1	1	1	1	1	1	1	1	1	1	1	1
GO:0016861	intramolecular oxidoreductase activity	interconverting aldoses and ketoses	molecular_function	1	1	1	1	1	1	1	1	1	1	1	1	1	1	1	1	1	1	1	1	1	1	1	1	1	1	1	1	1	1	1	1	1	1	1	1	1	1	1	1	1	1	1	1	1	1
GO:0016863	intramolecular oxidoreductase activity	transposing C=C bonds	molecular_function	1	1	1	1	1	1	1	1	1	1	1	1	1	1	1	1	1	1	1	1	1	1	1	1	1	1	1	1	1	1	1	1	1	1	1	1	1	1	1	1	1	1	1	1	1	1
GO:0016866	intramolecular transferase activity	molecular_function	1	1	1	1	1	1	1	1	1	1	1	1	1	1	1	1	1	1	1	1	1	1	1	1	1	1	1	1	1	1	1	1	1	1	1	1	1	1	1	1	1	1	1	1	1	1	1
GO:0016868	intramolecular transferase activity	phosphotransferases	molecular_function	1	1	1	1	1	1	1	1	1	1	1	1	1	1	1	1	1	1	1	1	1	1	1	1	1	1	1	1	1	1	1	1	1	1	1	1	1	1	1	1	1	1	1	1	1	1
GO:0016874	ligase activity	molecular_function	1	5.152e-06	1.8624e-06	1	1	1	1	1	1	1	1	1	1	1	1	1	1	1	1	1	1	1	1	1	1	1	1	1	1	1	1	1	0.00626234	1	1	1	1	1	0.0006336	1	1	1	1	1	1	1	1
GO:0016875	ligase activity	forming carbon-oxygen bonds	molecular_function	1	1	1	1	1	1	1	1	1	1	1	1	1	1	1	1	1	1	1	1	1	1	1	1	1	1	1	1	1	1	1	1	1	1	1	1	1	1	1	1	1	1	1	1	1	1
GO:0016876	ligase activity	forming aminoacyl-tRNA and related compounds	molecular_function	1	1	1	1	1	1	1	1	1	1	1	1	1	1	1	1	1	1	1	1	1	1	1	1	1	1	1	1	1	1	1	1	1	1	1	1	1	1	1	1	1	1	1	1	1	1
GO:0016877	ligase activity	forming carbon-sulfur bonds	molecular_function	1	1	1	1	1	1	1	1	1	1	1	1	1	1	1	1	1	1	1	1	1	1	1	1	1	1	1	1	1	1	1	1	1	1	1	1	1	1	1	1	1	1	1	1	1	1
GO:0016878	acid-thiol ligase activity	molecular_function	1	1	1	1	1	1	1	1	1	1	1	1	1	1	1	1	1	1	1	1	1	1	1	1	1	1	1	1	1	1	1	1	1	1	1	1	1	1	1	1	1	1	1	1	1	1	1
GO:0016879	ligase activity	forming carbon-nitrogen bonds	molecular_function	1	0.00056	4.512e-05	1	1	1	1	1	1	1	1	1	1	1	1	1	1	1	1	1	1	1	1	1	1	1	1	1	1	1	1	1	1	1	1	1	1	1	1	1	1	1	1	1	1	1
GO:0016880	acid-ammonia (or amide) ligase activity	molecular_function	1	1	1	1	1	1	1	1	1	1	1	1	1	1	1	1	1	1	1	1	1	1	1	1	1	1	1	1	1	1	1	1	1	1	1	1	1	1	1	1	1	1	1	1	1	1	1
GO:0016881	acid-amino acid ligase activity	molecular_function	1	0.0017888	0.0003936	1	1	1	1	1	1	1	1	1	1	1	1	1	1	1	1	1	1	1	1	1	1	1	1	1	1	1	1	1	1	1	1	1	1	1	0.00704474	1	1	1	1	1	1	1	1
GO:0016884	carbon-nitrogen ligase activity	with glutamine as amido-N-donor	molecular_function	1	1	1	1	1	1	1	1	1	1	1	1	1	1	1	1	1	1	1	1	1	1	1	1	1	1	1	1	1	1	1	1	1	1	1	1	1	1	1	1	1	1	1	1	1	1
GO:0016886	ligase activity	forming phosphoric ester bonds	molecular_function	1	1	1	1	1	1	1	1	1	1	1	1	1	1	1	1	1	1	1	1	1	1	1	1	1	1	1	1	1	1	1	1	1	1	1	1	1	1	1	1	1	1	1	1	1	1
GO:0016887	ATPase activity	molecular_function	1	1.5488e-05	2.2944e-08	1	1	1	1	1	1	1	1	1	1	1	1	1	1	1	1	1	1	1	1	1	1	1	1	1	1	1	1	1	0.00658755	1	1	1	1	1	0.00088	1	1	1	1	1	1	1	1
GO:0016888	endodeoxyribonuclease activity	producing 5'-phosphomonoesters	molecular_function	1	1	1	1	1	1	1	1	1	1	1	1	1	1	1	1	1	1	1	1	1	1	1	1	1	1	1	1	1	1	1	1	1	1	1	1	1	1	1	1	1	1	1	1	1	1
GO:0016891	endoribonuclease activity	producing 5'-phosphomonoesters	molecular_function	1	1	1	1	1	1	1	1	1	1	1	1	1	1	1	1	1	1	1	1	1	1	1	1	1	1	1	1	1	1	1	1	1	1	1	1	1	1	1	1	1	1	1	1	1	1
GO:0016893	endonuclease activity	active with either ribo- or deoxyribonucleic acids and producing 5'-phosphomonoesters	molecular_function	1	0.001904	0.0030624	1	1	1	1	1	1	1	1	1	1	1	1	1	1	1	1	1	1	1	1	1	1	1	1	1	1	1	1	1	1	1	1	1	1	1	1	1	1	1	1	1	1	1
GO:0016894	endonuclease activity	active with either ribo- or deoxyribonucleic acids and producing 3'-phosphomonoesters	molecular_function	1	1	1	1	1	1	0.00784384	1	1	1	1	1	1	1	1	1	1	1	1	1	1	1	1	1	1	1	1	1	1	1	1	1	1	1	1	1	1	1	1	1	1	1	1	1	1	1
GO:0016896	exoribonuclease activity	producing 5'-phosphomonoesters	molecular_function	1	1	1	1	1	1	1	1	1	1	1	1	1	1	1	1	1	1	1	1	1	1	1	1	1	1	1	1	1	1	1	1	1	1	1	1	1	1	1	1	1	1	1	1	1	1
GO:0016903	oxidoreductase activity	acting on the aldehyde or oxo group of donors	molecular_function	0.00632966	1	1	1	1	1	1	1	1	1	1	1	1	1	1	1	1	1	1	1	1	1	1	1	1	1	1	1	1	1	1	1	1	1	1	1	1	1	1	1	1	1	1	1	1	1
GO:0016917	GABA receptor activity	molecular_function	1	1	1	1	1	1	1	1	1	1	1	1	1	1	1	1	1	1	1	1	1	1	1	1	1	1	1	0.0007424	1	1	1	1	1	1	1	1	1	1	1	1	1	1	1	1	1	1	1
GO:0016986	obsolete transcription initiation factor activity	molecular_function	1	1	1	1	1	1	1	1	1	1	1	1	1	1	1	1	1	1	1	1	1	1	1	1	1	1	1	1	1	1	1	1	1	1	1	1	0.0017248	2.6048e-20	1	1.3952e-08	2.1664e-12	1	1	1	1	1	1
GO:0016998	cell wall macromolecule catabolic process	biological_process	1	1	1	1	1	1	1	1	1	1	1	1	1	1	1	1	1	1	1	1	1	1	1	1	1	1	1	1	1	1	1	1	1	1	1	1	1	1	1	1	1	1	1	1	1	1	1
GO:0017015	regulation of transforming growth factor beta receptor signaling pathway	biological_process	1	1	1	1	1	1	1	1	1	1	1	1	1	1	1	1	1	1	1	1	1	1	1	1	0.00595386	1	1	1	1	1	1	1	1	1	1	1	1	1	1	1	1	1	1	1	1	1	1
GO:0017016	Ras GTPase binding	molecular_function	1	1	1	1	1	1	1	1	1	1	1	1	1	1	1	1	1	1	1	1	1	1	1	1	1	1	1	1	1	1	1	1	1	1	1	1	1	1	0.0012512	1	1	1	1	1	1	1	1
GO:0017038	protein import	biological_process	0.0011392	1	1	1	1	1	1	1	1	1	1	1	1	1	1	1	1	1	1	1	1	1	1	1	1	1	1	1	1	1	1	1	1	1	1	1	1	1	1	1	1	1	1	1	1	1	1
GO:0017040	ceramidase activity	molecular_function	1	1	1	1	1	1	1	1	1	1	1	1	1	1	1	1	1	1	1	1	1	1	1	1	1	1	1	1	1	1	1	1	1	1	1	1	1	1	1	1	1	1	1	1	1	1	1
GO:0017048	Rho GTPase binding	molecular_function	1	1	1	1	1	1	1	1	1	1	1	1	1	1	1	1	1	1	1	1	1	1	1	1	1	1	1	1	1	1	1	1	1	1	1	1	1	1	3.488e-05	1	1	1	1	1	1	1	1
GO:0017053	transcriptional repressor complex	cellular_component	1	1	1	1	1	1	1	1	1	1	1	1	1	1	1	1	1	1	1	1	1	1	1	1	1	1	1	1	1	1	1	1	1	1	1	1	1	1	1	1	1	1	1	1	1	1	1
GO:0017076	purine nucleotide binding	molecular_function	2.72e-08	2.096e-12	1.3152e-05	1	1	1	1	1	1	1	1	1	1	1	1	1	1	1	1	1	1	1	1	1	1	1	1	1	1	1	1	1	1.1872e-13	1	1	1	1	1	1.3536e-10	1	1	1	1	1	1	1	1
GO:0017111	nucleoside-triphosphatase activity	molecular_function	0.00018752	2.0224e-07	3.328e-08	1	1	1	1	1	1	1	1	1	1	1	1	1	1	1	1	1	1	1	1	1	1	1	1	1	1	1	1	1	0.0008544	1	1	1	1	1	6.368e-08	1	1	1	1	1	1	1	1
GO:0017145	stem cell division	biological_process	1	1	1	1	1	1	1	1	1	1	1	1	1	1	1	1	1	1	1	1	1	1	1	1	1	1	1	1	1	1	1	1	1	1	1	1	1	1	1	1	1	1	1	1	1	1	1
GO:0017148	negative regulation of translation	biological_process	0.00409254	1	1	1	1	1	1	1	1	1	1	1	1	1	1	1	1	1	1	1	1	1	1	1	1	1	1	1	1	1	1	1	0.00168	1	1	1	1	1	1	1	1	1	1	1	1	1	1
GO:0017150	tRNA dihydrouridine synthase activity	molecular_function	1	1	1	1	1	1	1	1	1	1	1	1	1	1	1	1	1	1	1	1	1	1	1	1	1	1	1	1	1	1	1	1	1	1	1	1	1	1	1	1	1	1	1	1	1	1	1
GO:0017151	DEAD/H-box RNA helicase binding	molecular_function	1	1	1	1	1	1	1	1	1	1	1	1	1	1	1	1	1	1	1	1	1	1	1	1	1	1	1	1	1	1	1	1	1	1	1	1	1	1	1	1	1	1	1	1	1	1	1
GO:0017153	sodium:dicarboxylate symporter activity	molecular_function	1	1	1	1	1	1	1	1	1	1	1	1	1	1	1	1	1	1	1	1	1	1	1	1	1	1	1	1	0.00997302	1	1	1	1	1	1	1	1	1	1	1	1	1	1	1	1	1	1
GO:0017171	serine hydrolase activity	molecular_function	1	1	1	1	1	1	1	1	1	1	1	1	1	1	1	1	1	1	1	1	1	1	1	1	1	1	1	1	1	1	1	1	1	1	1	1	1	1	1	1	1	1	1	1	1	1	1
GO:0018024	histone-lysine N-methyltransferase activity	molecular_function	1	1	1	1	1	1	1	1	1	1	1	1	1	1	1	1	1	1	1	1	1	1	1	1	1	1	1	1	1	1	1	1	1	1	1	1	1	1	1	1	1	1	1	1	1	1	1
GO:0018105	peptidyl-serine phosphorylation	biological_process	1	1	1	1	1	1	1	1	1	1	1	1	1	1	1	1	1	1	1	1	1	1	1	1	1	1	1	1	1	1	1	1	1	1	1	1	1	1	1	1	1	1	1	1	1	1	1
GO:0018130	heterocycle biosynthetic process	biological_process	1	1	1	1	1	1	1	1	1	1	1	1	1	1	1	1	1	1	1	1	1	1	1	1	1	1	1	1	1	1	1	1	1	1	1	1	1	1	1	1	1	1	1	1	1	1	1
GO:0018193	peptidyl-amino acid modification	biological_process	1	1	1	1	1	1	1	1	1	1	1	1	1	1	1	1	1	1	1	1	1	1	1	1	1	1	1	1	1	1	1	1	1	1	1	1	1	1	1	1	1	1	1	1	1	1	1
GO:0018205	peptidyl-lysine modification	biological_process	1	1	1	1	1	1	1	1	1	1	1	1	1	1	1	1	1	1	1	1	1	1	1	1	1	1	1	1	1	1	1	1	1	1	1	1	1	1	1	1	1	1	1	1	1	1	1
GO:0018209	peptidyl-serine modification	biological_process	1	1	1	1	1	1	1	1	1	1	1	1	1	1	1	1	1	1	1	1	1	1	1	1	1	1	1	1	1	1	1	1	1	1	1	1	1	1	1	1	1	1	1	1	1	1	1
GO:0018904	ether metabolic process	biological_process	1	1	1	1	1	1	1	1	1	1	0.00096	1	1	1	1	1	1	1	1	1	1	1	1	1	1	1	1	1	1	1	1	1	1	1	1	1	1	1	1	1	1	1	1	1	1	1	1
GO:0018958	phenol-containing compound metabolic process	biological_process	1	1	1	1	1	1	1	1	1	1	1	1	1	1	1	1	1	1	1	1	1	1	1	1	1	1	1	1	1	1	1	1	1	1	1	1	1	1	1	1	1	1	1	1	1	1	1
GO:0018988	obsolete molting cycle	protein-based cuticle	biological_process	1	1	1	1	1	1	1	1	1	1	1	1	1	5.728e-06	9.856e-07	1	1	1	1	1	1	1	1	1	1	1	0.00754173	1	1	1	1	1	1	1	1	1	1	1	3.456e-08	1	1	2.8928e-08	0.000528	6.528e-06	0.00616976	1
GO:0018991	oviposition	biological_process	1	1	1	1	1	1	1	1	1	1	1	1	0.00864083	0.00797152	0.00588803	1	1	1.9968e-07	4.032e-06	1	1	0.00347197	1	6.016e-05	1	1	1	1	1	1	1	1	1	1	1	1	1	1	0.00817955	1	1	3.328e-15	2.9024e-07	1.1008e-06	1	1	1
GO:0018992	germ-line sex determination	biological_process	1	1	1	1	1	1	1	1	1	1	1	1	1	1	1	1	1	1	1	1	1	1	1	1	1	1	1	1	1	1	1	1	1	1	1	1	1	1	1	1	1	1	1	1	1	1	1
GO:0018993	somatic sex determination	biological_process	1	0.0014688	1	1	1	1	1	1	1	1	1	1	1	1	1	1	1	1	1	1	1	1	1	1	1	1	1	1	1	1	1	1	1	1	1	1	1	1	1	1	1	1	1	1	1	1	1
GO:0018996	molting cycle	collagen and cuticulin-based cuticle	biological_process	1	1	1	1	1	1	1	1	1	1	1	1	1	5.728e-06	9.856e-07	1	1	1	1	1	1	1	1	1	1	1	0.00754173	1	1	1	1	1	1	1	1	1	1	1	3.456e-08	1	1	2.8928e-08	0.000528	6.528e-06	0.00616976	1
GO:0019001	guanyl nucleotide binding	molecular_function	1	1	1	1	1	1	1	1	1	1	1	1	1	1	1	1	1	1	1	1	1	1	1	1	1	1	1	1	1	1	1	1	1	1	1	1	1	1	1	1	1	1	1	1	1	1	1
GO:0019098	reproductive behavior	biological_process	1	1	1	1	1	1	1	1	1	1	1	1	1	0.00344304	1	1	1	9.12e-07	1.2e-05	1	1	0.00693386	1	1.0304e-05	1	1	1	1	1	1	1	1	1	1	1	1	1	1	0.00970451	1	1	3.392e-14	1.2416e-07	1.3056e-07	1	1	1
GO:0019184	nonribosomal peptide biosynthetic process	biological_process	1	1	1	1	1	1	1	1	1	1	1	1	1	1	1	1	1	1	1	1	1	1	1	1	1	1	1	1	1	1	1	1	1	1	1	1	1	1	1	1	1	1	1	1	1	1	1
GO:0019199	transmembrane receptor protein kinase activity	molecular_function	1	1	1	1	1	1	1	1	1	1	1	1	1	1	1	1	1	1	1	1	1	1	1	1	1	1	1	1	1	1	1	1	1	1	1	1	1	1	1	1	1	1	1	1	1	1	1
GO:0019200	carbohydrate kinase activity	molecular_function	1	1	1	1	1	1	1	1	1	1	1	1	1	1	1	1	1	1	1	1	1	1	1	1	1	1	1	1	1	1	1	1	1	1	1	1	1	1	1	1	1	1	1	1	1	1	1
GO:0019201	nucleotide kinase activity	molecular_function	1	1	1	1	1	1	1	1	1	1	1	1	1	1	1	1	1	1	1	1	1	1	1	1	1	1	1	1	1	1	1	1	1	1	1	1	1	1	1	1	1	1	1	1	1	1	1
GO:0019205	nucleobase-containing compound kinase activity	molecular_function	1	1	1	1	1	1	1	1	1	1	1	1	1	1	1	1	1	1	1	1	1	1	1	1	1	1	1	1	1	1	1	1	1	1	1	1	1	1	1	1	1	1	1	1	1	1	1
GO:0019207	kinase regulator activity	molecular_function	1	1	1	1	1	1	1	1	1	1	1	1	1	1	1	1	1	1	1	1	1	1	1	1	1	1	1	1	1	1	1	1	1	1	1	1	1	1	1	1	1	1	1	1	1	1	1
GO:0019208	phosphatase regulator activity	molecular_function	1	1	1	1	1	1	1	1	1	1	1	1	1	1	1	1	1	1	1	1	1	1	1	1	1	1	1	1	1	1	1	1	1	1	1	1	1	1	1	1	1	1	1	1	1	1	1
GO:0019213	deacetylase activity	molecular_function	1	1	1	1	1	1	1	1	1	1	1	1	1	1	1	1	1	1	1	1	1	1	1	1	1	1	1	1	1	1	1	1	1	1	1	1	1	1	1	1	1	1	1	1	1	1	1
GO:0019216	regulation of lipid metabolic process	biological_process	1	1	1	1	1	1	1	1	1	1	1	1	1	1	1	1	1	1	1	1	1	1	1	1	1	1	1	1	1	1	1	1	1	1	1	1	1	1	1	1	1	1	1	1	1	1	1
GO:0019219	regulation of nucleobase-containing compound metabolic process	biological_process	1	1	1	1	1	1	1	1	1	1	1	1	1	1	1	1	2.272e-05	2.8192e-08	6.176e-05	1	3.488e-08	1	1	0.0027392	1	1	1	1	1	1	1	3.776e-08	1	1	0.00595238	0.0009312	1	1	1	1	0.00022208	6.944e-08	0.00405968	1	1	1	1
GO:0019220	regulation of phosphate metabolic process	biological_process	1	1	1	1	1	1	1	1	1	1	1	1	1	1	1	1	1	1	1	1	1	1	1	1	1	1	1	1	1	1	0.00397472	1	1	1	1	1	1	1	1	1	1	1	1	1	1	1	1
GO:0019222	regulation of metabolic process	biological_process	1	1	1	1	1	1	1	1	1	1	1	1	1	1	1	1	2.4128e-05	2.8416e-07	2.8032e-05	1	2.3936e-08	1	1	1	1	1	1	1	1	1	1	2.304e-07	1	1	0.00471338	2.9856e-05	1	1	1	1	0.00579475	2.3136e-06	1	1	1	1	1
GO:0019226	transmission of nerve impulse	biological_process	1	1	1	1	1	1	1	1	1	1	1	1	1	1	0.0020832	1	1	1	1	1	1	1	1	1	1	1	7.584e-05	8.32e-08	1	1	0.0014944	1	1	1	1	1	1	1	1	1	1	1	0.0007488	3.232e-06	1	4.8e-05	1
GO:0019239	deaminase activity	molecular_function	1	1	1	1	1	1	1	1	1	1	1	1	1	1	1	1	1	1	1	1	1	1	1	1	1	1	1	1	1	1	1	1	1	1	1	1	1	1	1	1	1	1	1	1	1	1	1
GO:0019290	siderophore biosynthetic process	biological_process	1	1	1	1	1	1	1	1	1	1	1	1	1	1	1	1	1	1	1	1	1	1	1	1	1	1	1	1	1	1	1	1	1	1	1	1	1	1	1	1	1	1	1	1	1	1	1
GO:0019318	hexose metabolic process	biological_process	0.00449562	1	1	1	1	1	1	1	1	1	1	1	1	1	1	1	1	1	1	1	1	1	1	1	1	1	1	1	1	1	1	1	1	1	1	1	1	1	1	1	1	1	1	1	1	1	1
GO:0019319	hexose biosynthetic process	biological_process	1	1	1	1	1	1	1	1	1	1	1	1	1	1	1	1	1	1	1	1	1	1	1	1	1	1	1	1	1	1	1	1	1	1	1	1	1	1	1	1	1	1	1	1	1	1	1
GO:0019320	hexose catabolic process	biological_process	0.00017184	1	1	1	1	1	1	1	1	1	1	1	1	1	1	1	1	1	1	1	1	1	1	1	1	1	1	1	1	1	1	1	1	1	1	1	1	1	1	1	1	1	1	1	1	1	1
GO:0019359	nicotinamide nucleotide biosynthetic process	biological_process	1	1	1	1	1	1	1	1	1	1	1	1	1	1	1	1	1	1	1	1	1	1	1	1	1	1	1	1	1	1	1	1	1	1	1	1	1	1	1	1	1	1	1	1	1	1	1
GO:0019362	pyridine nucleotide metabolic process	biological_process	1	1	1	1	1	1	1	1	1	1	1	1	1	1	1	1	1	1	1	1	1	1	1	1	1	1	1	1	1	1	1	1	1	1	1	1	1	1	1	1	1	1	1	1	1	1	1
GO:0019363	pyridine nucleotide biosynthetic process	biological_process	1	1	1	1	1	1	1	1	1	1	1	1	1	1	1	1	1	1	1	1	1	1	1	1	1	1	1	1	1	1	1	1	1	1	1	1	1	1	1	1	1	1	1	1	1	1	1
GO:0019395	fatty acid oxidation	biological_process	1	1	1	1	1	1	1	1	1	1	1	1	1	1	1	1	1	1	1	1	1	1	1	1	1	1	1	1	1	1	1	1	1	1	1	1	1	1	1	1	1	1	1	1	1	1	1
GO:0019400	alditol metabolic process	biological_process	1	1	1	1	1	1	1	1	1	1	1	1	1	1	1	1	1	1	1	1	1	1	1	1	1	1	1	1	1	1	1	1	1	1	1	1	1	1	1	1	1	1	1	1	1	1	1
GO:0019405	alditol catabolic process	biological_process	1	1	1	1	1	1	1	1	1	1	1	1	1	1	1	1	1	1	1	1	1	1	1	1	1	1	1	1	1	1	1	1	1	1	1	1	1	1	1	1	1	1	1	1	1	1	1
GO:0019438	aromatic compound biosynthetic process	biological_process	1	1	1	1	1	1	1	1	1	1	1	1	1	1	1	1	1	1	1	1	1	1	1	1	1	1	1	1	1	1	1	1	1	1	1	1	1	1	1	1	1	1	1	1	1	1	1
GO:0019439	aromatic compound catabolic process	biological_process	1	1	1	1	1	1	1	1	1	1	1	1	1	1	1	1	1	1	1	1	1	1	1	1	1	1	1	1	1	1	1	1	1	1	1	1	1	1	1	1	1	1	1	1	1	1	1
GO:0019538	protein metabolic process	biological_process	1	1.6064e-06	1.5072e-05	1	1	1	1	1	1	1	1	1	1	1	1	1	1	1	1	1	1	1	1	1	1	1	1	1	1	1	1	1	3.52e-05	1	1	1	1	1	1	1	1	1	1	1	1	1	1
GO:0019540	siderophore biosynthetic process from catechol	biological_process	1	1	1	1	1	1	1	1	1	1	1	1	1	1	1	1	1	1	1	1	1	1	1	1	1	1	1	1	1	1	1	1	1	1	1	1	1	1	1	1	1	1	1	1	1	1	1
GO:0019563	glycerol catabolic process	biological_process	1	1	1	1	1	1	1	1	1	1	1	1	1	1	1	1	1	1	1	1	1	1	1	1	1	1	1	1	1	1	1	1	1	1	1	1	1	1	1	1	1	1	1	1	1	1	1
GO:0019637	organophosphate metabolic process	biological_process	1	1	1	1	1	1	1	1	1	1	1	1	1	1	1	1	1	1	1	1	1	1	1	1	1	1	1	1	1	1	1	1	1	1	1	1	1	1	1	1	1	1	1	1	1	1	1
GO:0019674	NAD metabolic process	biological_process	1	1	1	1	1	1	1	1	1	1	1	1	1	1	1	1	1	1	1	1	1	1	1	1	1	1	1	1	1	1	1	1	1	1	1	1	1	1	1	1	1	1	1	1	1	1	1
GO:0019720	Mo-molybdopterin cofactor metabolic process	biological_process	1	1	1	1	1	1	1	1	1	1	1	1	1	1	1	1	1	1	1	1	1	1	1	1	1	1	1	1	1	1	1	1	1	1	1	1	1	1	1	1	1	1	1	1	1	1	1
GO:0019722	calcium-mediated signaling	biological_process	1	1	1	1	1	1	1	1	1	1	1	1	1	1	1	1	1	1	1	1	1	1	1	1	1	1	1	1	1	1	1	1	1	1	1	1	1	1	1	1	1	1	1	1	1	1	1
GO:0019725	cellular homeostasis	biological_process	1	1	1	1	1	1	1	1	1	1	1	1	1	1	1	1	1	1	1	1	1	1	1	1	1	1	1	1	1	1	1	1	1	1	1	1	1	1	1	1	1	1	1	1	1	1	1
GO:0019748	secondary metabolic process	biological_process	1	1	1	1	1	1	1	1	1	1	1	1	1	1	1	1	1	1	1	1	1	1	1	1	1	1	1	1	1	1	1	1	1	1	1	1	1	1	1	1	1	1	1	1	1	1	1
GO:0019751	polyol metabolic process	biological_process	1	1	1	1	1	1	1	1	1	1	1	1	1	1	1	1	1	1	1	1	1	1	1	1	1	1	1	1	1	1	1	1	1	1	1	1	1	1	1	1	1	1	1	1	1	1	1
GO:0019752	carboxylic acid metabolic process	biological_process	1	0.0025216	1	1	1	1	1	1	1	1	1	1	1	1	1	1	1	1	1	1	1	1	1	1	1	1	1	1	1	1	1	1	1	1	1	1	1	1	1	1	0.0005728	1	1	1	1	1	1
GO:0019773	proteasome core complex	alpha-subunit complex	cellular_component	1.1136e-06	2.6944e-05	0.0027552	1	1	1	1	1	1	1	1	1	1	1	1	1	1	1	1	1	1	1	1	1	1	1	1	1	1	1	1	1	0.0012672	0.00596723	1	1	1	1	1	1	1	1	1	1	1	1
GO:0019787	ubiquitin-like protein transferase activity	molecular_function	1	0.0011328	8.672e-05	1	1	1	1	1	1	1	1	1	1	1	1	1	1	1	1	1	1	1	1	1	1	1	1	1	1	1	1	1	1	1	1	1	1	1	0.0028512	1	1	1	1	1	1	1	1
GO:0019825	oxygen binding	molecular_function	1	1	1	1	1	1	1	1	1	1	1	1	1	1	1	1	1	1	1	1	1	1	1	1	1	1	1	1	6.048e-11	1.056e-09	1	1	1	1	1	1	1	1	1	1	1	1	1	1	1	1	1
GO:0019829	cation-transporting ATPase activity	molecular_function	1	1	1	1	1	1	1	1	1	1	1	1	1	1	1	1	1	1	1	1	1	1	1	1	1	1	1	1	1	1	1	1	1	1	1	1	1	1	1	1	1	1	1	1	1	1	1
GO:0019842	vitamin binding	molecular_function	1	1	1	1	1	1	1	1	1	1	1	1	1	1	1	1	1	1	1	1	1	1	1	1	1	1	1	1	1	1	1	1	1	1	1	1	1	1	1	1	1	1	1	1	1	1	1
GO:0019843	rRNA binding	molecular_function	1	1	1	1	1	1	1	1	1	1	1	1	1	1	1	1	1	1	1	1	1	1	1	1	1	1	1	1	1	1	1	1	1	1	1	1	1	1	1	1	1	1	1	1	1	1	1
GO:0019866	organelle inner membrane	cellular_component	1	0.00208	0.00565171	1	1	1	1	1	1	1	1	1	1	1	1	1	1	1	1	1	1	1	1	1	1	1	1	1	1	1	1	1	1	1	0.00874118	1	1	1	1	1	1	1	1	1	1	1	1
GO:0019867	outer membrane	cellular_component	1	1	1	1	1	1	1	1	1	1	1	1	1	1	1	1	1	1	1	1	1	1	1	1	1	1	1	1	1	1	1	1	1	1	1	1	1	1	1	1	1	1	1	1	1	1	1
GO:0019887	protein kinase regulator activity	molecular_function	1	1	1	1	1	1	1	1	1	1	1	1	1	1	1	1	1	1	1	1	1	1	1	1	1	1	1	1	1	1	1	1	1	1	1	1	1	1	1	1	1	1	1	1	1	1	1
GO:0019888	protein phosphatase regulator activity	molecular_function	1	1	1	1	1	1	1	1	1	1	1	1	1	1	1	1	1	1	1	1	1	1	1	1	1	1	1	1	1	1	1	1	1	1	1	1	1	1	1	1	1	1	1	1	1	1	1
GO:0019894	kinesin binding	molecular_function	1	1	1	1	1	1	1	1	1	1	1	1	1	1	1	1	1	1	1	1	1	1	1	1	1	1	1	1	1	1	1	1	1	1	1	1	1	1	1	1	1	1	1	1	1	1	1
GO:0019897	extrinsic component of plasma membrane	cellular_component	1	1	1	1	1	1	1	1	1	1	1	1	1	1	1	1	1	1	1	1	1	1	1	1	1	1	1	1	1	1	1	1	1	1	1	1	1	1	1	1	1	1	1	1	1	1	1
GO:0019898	extrinsic component of membrane	cellular_component	1	1	1	1	1	1	1	1	1	1	1	1	1	1	1	1	1	1	1	1	1	1	1	1	1	1	1	1	1	1	1	1	1	1	1	1	1	1	1	1	1	1	1	1	1	1	1
GO:0019899	enzyme binding	molecular_function	1	1	1	1	1	1	1	1	1	1	1	1	1	1	1	1	1	1	1	1	1	1	1	1	1	1	1	1	1	1	1	1	1	1	1	1	1	1	1	1	1	1	1	1	1	1	1
GO:0019900	kinase binding	molecular_function	1	1	1	1	1	1	1	1	1	1	1	1	1	1	1	1	1	1	1	1	1	1	1	1	1	1	1	1	1	1	1	1	0.00681389	1	1	1	1	1	1	1	1	1	1	1	1	1	1
GO:0019901	protein kinase binding	molecular_function	1	1	1	1	1	1	1	1	1	1	1	1	1	1	1	1	1	1	1	1	1	1	1	1	1	1	1	1	1	1	1	1	0.00681389	1	1	1	1	1	1	1	1	1	1	1	1	1	1
GO:0019904	protein domain specific binding	molecular_function	1	0.0021312	1	1	1	1	1	1	1	1	1	1	1	1	1	1	1	1	1	1	1	1	1	1	1	1	1	1	1	1	1	1	0.0006144	1	1	1	1	1	1	1	1	1	1	1	1	1	1
GO:0019915	lipid storage	biological_process	1	1	1	1	1	1	1	1	1	1	1	1	1	1	1	1	1	1	1	1	1	1	1	1	1	1	1	1	1	1	1	1	1	1	1	1	1	1	1	1	1	1	1	1	1	1	1
GO:0019932	second-messenger-mediated signaling	biological_process	1	1	1	1	1	1	1	1	1	1	1	1	1	1	1	1	1	1	1	1	1	1	1	1	1	1	1	1	1	1	1	1	1	1	1	1	1	1	1	1	1	1	1	1	1	1	1
GO:0019933	cAMP-mediated signaling	biological_process	1	1	1	1	1	1	1	1	1	1	1	1	1	1	1	1	1	1	1	1	1	1	1	1	1	1	1	1	1	1	1	1	1	1	1	1	1	1	1	1	1	1	1	1	1	1	1
GO:0019935	cyclic-nucleotide-mediated signaling	biological_process	1	1	1	1	1	1	1	1	1	1	1	1	1	1	1	1	1	1	1	1	1	1	1	1	1	1	1	1	1	1	1	1	1	1	1	1	1	1	1	1	1	1	1	1	1	1	1
GO:0019941	modification-dependent protein catabolic process	biological_process	0.00397075	3.584e-07	2.592e-05	8.672e-06	7.296e-06	1	1	1	1	1	1	1	1	1	1	1	0.0019456	1	1	1	1	1	1	1	1	1	1	1	1	1	1	1	1	0.00288	1	1	1	1	1	1	1	1	1	1	1	1	1
GO:0019953	sexual reproduction	biological_process	1.0592e-08	1.1264e-09	2.5952e-11	0.0024992	1	1	1	1	1	1	1	1	1	1	1	1	1	1	1	1	1	1	1	1	1	1	1	1	1	1	1	1	8.384e-12	0.0006208	1	0.0008288	1	1	1	1	1	1	1	1	1	1	1
GO:0020037	heme binding	molecular_function	1	1	1	1	1	1	1	1	1	1	1	1	1	1	1	1	1	1	1	1	1	1	1	1	1	1	1	1	0.00152	1.2832e-06	1	1	1	1	1	1	1	1	1	1	1	1	1	1	1	1	1
GO:0021700	developmental maturation	biological_process	1	1	1	1	1	1	1	1	1	1	1	1	1	1	1	1	1	1	1	1	1	1	1	1	1	1	1	1	1	1	1	1	1	1	1	1	0.0029408	1	1	1	1	1	1	1	1	1	1
GO:0022008	neurogenesis	biological_process	1	1	1	1	1	1	1	1	1	1	1	1	1	1	0.00018976	1	1	2.9408e-07	3.744e-05	1	0.000352	1.312e-05	1	1	1	1	1	1	1	1	1	1	1	1	1	1	1	1	3.68e-10	0.00010624	2.7584e-05	6.752e-17	1.0752e-05	0.0022336	1	1	1
GO:0022402	cell cycle process	biological_process	8.576e-13	2.176e-22	1.44e-15	0.0027072	1	1.04e-05	3.1776e-08	1	0.0005536	1	1	1	1	1	1	1	1	1	1	1	1	1	1	1	1	1	1	1	1	1	1	1	1.9552e-15	0.00021408	1	2.7776e-32	7.712e-31	4.416e-12	0.0006336	1	1	1	1	1	1	1	1
GO:0022403	cell cycle phase	biological_process	1.1712e-08	1.6064e-16	5.056e-14	0.0007456	1	5.088e-07	3.584e-09	1	0.00012768	1	1	1	1	1	1	1	1	1	1	1	1	1	1	1	1	1	1	1	1	1	1	1	1.952e-10	0.0004928	1	8.192e-30	2.5376e-30	1.6864e-12	0.00939936	1	1	1	1	1	1	1	1
GO:0022404	molting cycle process	biological_process	1	1	1	1	1	1	1	1	1	1	1	1	1	1	1	1	1	1	1	1	1	1	1	1	1	1	1	1	1	1	1	1	1	1	1	1	1	1	1	1	1	1	1	1	1	1	1
GO:0022406	membrane docking	biological_process	1	1	1	1	1	1	1	1	1	1	1	1	1	1	1	1	1	1	1	1	1	1	1	1	1	1	1	1	1	1	1	1	1	1	1	1	1	1	1	1	1	1	1	1	1	1	1
GO:0022411	cellular component disassembly	biological_process	1	1	1	1	1	1	0.00558122	1	1	1	1	1	1	1	1	1	1	1	1	1	1	1	1	1	1	1	1	1	1	1	1	1	1	1	1	0.00948029	1	1	1	1	1	1	1	1	1	1	1
GO:0022414	reproductive process	biological_process	1.0528e-08	4.48e-17	2.4768e-16	0.0006752	1	0.0017984	1.0432e-12	4.096e-05	0.00835882	1	1	1	1	0.0055457	0.0029248	1	1	1.8848e-07	0.00015552	1	1	1	1	1	1	1	1	1	1	1	1	1	3.52e-12	1	0.0003808	2.3264e-27	6.496e-22	1.3088e-12	3.0304e-10	1	1	4.64e-06	1	1	1	1	1
GO:0022603	regulation of anatomical structure morphogenesis	biological_process	1	1	1	1	1	1	1	1	1	1	1	1	1	1	1	1	1	1	1	1	1	1	1	1	1	1	1	1	1	1	1	1	1	1	1	1	1	1	1	1	1	1	1	1	1	1	1
GO:0022604	regulation of cell morphogenesis	biological_process	1	1	1	1	1	1	1	1	1	1	1	1	1	1	1	1	1	1	1	1	1	1	1	1	1	1	1	1	1	1	1	1	1	1	1	1	1	1	1	1	1	1	1	1	1	1	1
GO:0022607	cellular component assembly	biological_process	1	1	1	1	1	1	1.456e-10	4.608e-09	1	7.456e-10	1	1	1	1	1	1	1	1.7184e-07	0.0006272	1	1	1	1	0.0022272	1	1	1	1	1	1	1	1	1	1	1	3.616e-09	7.232e-31	3.04e-30	1	1.0944e-12	4.928e-12	0.00486739	2.1312e-06	3.776e-06	1	1	1
GO:0022610	biological adhesion	biological_process	1	1	1	1	1	1	1	1	1	1	1	1	1	1	9.024e-12	1	1	1	0.0004416	1	0.00358947	4.704e-09	6.016e-06	7.392e-05	5.024e-05	1	1	1	1	1	1	1	1	1	1	1	1	1	2.5792e-13	8.8e-09	1	4.128e-17	1.68e-13	3.328e-12	1	1	1
GO:0022611	dormancy process	biological_process	1	1	1	1	1	1	1	1	1	1	1	1	1	1	1	1	1	1	1	1	1	1	1	1	1	1	1	1	1	1	1	1	0.0009312	1	1	1	1	1	1	1	1	1	1	1	1	1	1
GO:0022613	ribonucleoprotein complex biogenesis	biological_process	1	1	1	1	1	1	1	1	1	1	1	1	1	1	1	1	1	1	1	1	1	1	1	1	1	1	1	1	1	1	1	1	1	1	1	1	1	1	1	1	1	1	1	1	1	1	1
GO:0022618	ribonucleoprotein complex assembly	biological_process	1	1	1	1	1	1	1	1	1	1	1	1	1	1	1	1	1	1	1	1	1	1	1	1	1	1	1	1	1	1	1	1	1	1	1	1	1	1	1	1	1	1	1	1	1	1	1
GO:0022803	passive transmembrane transporter activity	molecular_function	1	1	1	1	1	1	1	1	1	1	1	1	1	1	1	1	1	1	1	1	1	1	1	1	1	1	8.48e-13	1.0432e-38	2.224e-43	4.352e-28	2.9152e-09	1	1	1	1	1	1	1	1	1	1	1	1	1	1	5.888e-20	1
GO:0022804	active transmembrane transporter activity	molecular_function	1	1	1	1	1	1	1	1	1	1	1	1	1	1	1	1	1	1	1	1	1	1	1	1	1	1	0.0013984	1	1	1	1	1	1	1	1	1	1	1	1	1	1	1	1	1	1	1	1
GO:0022832	voltage-gated channel activity	molecular_function	1	1	1	1	0.00320566	1	1	1	1	1	1	1	1	1	1	1	1	1	1	1	1	1	1	1	1	1	1	1	0.0004256	1	0.000512	1	1	1	1	1	1	1	1	1	1	1	1	1	1	1	1
GO:0022834	ligand-gated channel activity	molecular_function	1	1	1	1	1	1	1	1	1	1	1	1	1	1	1	1	1	1	1	1	1	1	1	1	1	1	1.0944e-06	1.8592e-24	2.5536e-24	1.056e-16	1	1	1	1	1	1	1	1	1	1	1	1	1	1	1	1.8624e-08	1
GO:0022836	gated channel activity	molecular_function	1	1	1	1	1	1	1	1	1	1	1	1	1	1	1	1	1	1	1	1	1	1	1	1	1	1	5.28e-08	5.856e-24	5.6e-28	3.424e-19	2.656e-06	1	1	1	1	1	1	1	1	1	1	1	1	1	1	1.6736e-11	1
GO:0022838	substrate-specific channel activity	molecular_function	1	1	1	1	1	1	1	1	1	1	1	1	1	1	1	1	1	1	1	1	1	1	1	1	1	1	6.048e-13	5.088e-39	4.384e-43	8.256e-28	2.2688e-09	1	1	1	1	1	1	1	1	1	1	1	1	1	1	1.5776e-19	1
GO:0022839	ion gated channel activity	molecular_function	1	1	1	1	1	1	1	1	1	1	1	1	1	1	1	1	1	1	1	1	1	1	1	1	1	1	1	1	1	1	1	1	1	1	1	1	1	1	1	1	1	1	1	1	1	1	1
GO:0022843	voltage-gated cation channel activity	molecular_function	1	1	1	1	0.0012992	1	1	1	1	1	1	1	1	1	1	1	1	1	1	1	1	1	1	1	1	1	1	1	0.000432	1	0.00864118	1	1	1	1	1	1	1	1	1	1	1	1	1	1	1	1
GO:0022857	transmembrane transporter activity	molecular_function	1	1	1	1	1	1	1	1	1	1	1	1	1	1	1	1	1	1	1	1	1	1	1	1	1	1	5.728e-14	2.2784e-30	5.056e-35	3.0048e-23	3.36e-09	1	1	1	1	1	1	1	1	1	1	1	1	1	0.0030368	6.976e-13	1
GO:0022884	macromolecule transmembrane transporter activity	molecular_function	1	1	1	1	1	1	1	1	1	1	1	1	1	1	1	1	1	1	1	1	1	1	1	1	1	1	1	1	1	1	1	1	1	1	1	1	1	1	1	1	1	1	1	1	1	1	1
GO:0022890	inorganic cation transmembrane transporter activity	molecular_function	1	1	0.0013792	1	1	1	1	1	1	1	1	1	1	1	1	1	1	1	1	1	1	1	1	1	1	1	1	1	1	1	1	1	1	1	1	1	1	1	1	1	1	1	1	1	1	1	1
GO:0022891	substrate-specific transmembrane transporter activity	molecular_function	1	1	1	1	1	1	1	1	1	1	1	1	1	1	1	1	1	1	1	1	1	1	1	1	1	1	1.2384e-14	2.8608e-31	1.2768e-33	2.7424e-22	8.192e-10	1	1	1	1	1	1	1	1	1	1	1	1	1	0.001168	1.9232e-14	1
GO:0022892	substrate-specific transporter activity	molecular_function	1	1	1	1	1	1	1	1	1	1	1	1	1	1	1	1	1	1	1	1	1	1	1	1	1	1	1.1872e-14	4.416e-29	1.2192e-30	1.3216e-19	1.2928e-08	1	1	1	1	1	1	1	1	1	1	1	1	1	0.0023328	5.952e-14	1
GO:0022900	electron transport chain	biological_process	1	1	1	1	1	1	1	1	1	1	1	1	1	1	1	1	1	1	1	1	1	1	1	1	1	1	1	1	1	1	1	1	1	1	1	1	1	1	1	1	0.00985411	1	1	1	1	1	1
GO:0022904	respiratory electron transport chain	biological_process	1	1	1	1	1	1	1	1	1	1	1	1	1	1	1	1	1	1	1	1	1	1	1	1	1	1	1	1	1	1	1	1	1	1	1	1	1	1	1	1	0.002192	1	1	1	1	1	1
GO:0023014	signal transduction by protein phosphorylation	biological_process	1	1	1	1	1	1	1	1	1	1	1	1	1	1	1	1	1	1	1	1	1	1	1	1	1	1	1	1	1	1	1	1	1	1	1	1	1	1	1	1	1	1	1	1	1	1	1
GO:0023051	regulation of signaling	biological_process	1	1	1	1	1	1	1	1	1	1	1	1	1	0.00321446	1	1	1	1	1	1	1	1	1	1	1	1	1	1	1	1	1	1	1	1	1	1	1	1	1	1	1	1	1	1	1	1	1
GO:0023052	signaling	biological_process	1	1	1	1	1	1	1	1	1	1	1	1	1	1	4.288e-06	1	1	1	1	1	1	0.0015072	1	1	1	1	1.1712e-14	1.5744e-21	3.264e-16	2.2976e-09	5.632e-07	1	1	1	1	1	1	1	1	1	1	1	1	3.328e-06	0.0001328	5.632e-13	1
GO:0023056	positive regulation of signaling	biological_process	1	1	1	1	1	1	1	1	1	1	1	1	1	1	1	1	1	1	1	1	1	1	1	1	1	1	1	1	1	1	1	1	1	1	1	1	1	1	1	1	1	1	1	1	1	1	1
GO:0023057	negative regulation of signaling	biological_process	1	1	1	1	1	1	1	1	1	1	1	1	1	1	1	1	1	1	1	1	1	1	1	1	1	1	1	1	1	1	1	1	1	1	1	1	1	1	1	1	1	1	1	1	1	1	1
GO:0023060	obsolete signal transmission	biological_process	1	1	1	1	1	1	1	1	1	1	1	1	1	0.0004032	1.1328e-10	1	1	1	0.0027904	1	1	0.001088	1	1	0.0009248	0.00356995	1.5328e-06	7.616e-05	1	1	1	1	1	1	1	1	1	1	0.00011072	1	1	1	2.72e-07	9.312e-12	2.3936e-06	0.00030944	1
GO:0023061	signal release	biological_process	1	1	1	1	1	1	1	1	1	1	1	1	1	1	1	1	1	1	1	1	1	1	1	1	1	1	1	1	1	1	1	1	1	1	1	1	1	1	1	1	1	1	1	1	1	1	1
GO:0030001	metal ion transport	biological_process	1	1	1	1	1	1	1	1	1	1	1	1	1	1	1	1	1	1	1	1	1	1	1	1	1	1	0.00733069	1.3664e-09	2.4032e-12	1.088e-07	4.64e-07	1	1	1	1	1	1	1	1	1	1	1	1	1	1	0.000592	1
GO:0030003	cellular cation homeostasis	biological_process	1	1	1	1	1	1	1	1	1	1	1	1	1	1	1	1	1	1	1	1	1	1	1	1	1	1	1	1	1	1	1	1	1	1	1	1	1	1	1	1	1	1	1	1	1	1	1
GO:0030010	establishment of cell polarity	biological_process	1	0.00871891	0.0082057	1	1	1	1	1	1	1	1	1	1	1	1	1	1	1	1	1	1	1	1	1	1	1	1	1	1	1	1	1	0.0019712	1	1	1	1	1	0.00794416	1	1	1	1	1	1	1	1
GO:0030016	myofibril	cellular_component	1	1	1	1	1	1	1	1	1	1	1	1	1	1	1	1	1	1	1	1	1	1	1	1	1	1	0.0006656	1	1	1	0.00312	1	1	1	1	1	1	1	1	1	1	0.0003552	7.648e-12	3.1136e-12	2.4096e-08	1	1
GO:0030017	sarcomere	cellular_component	1	1	1	1	1	1	1	1	1	1	1	1	1	1	1	1	1	1	1	1	1	1	1	1	1	1	0.0006656	1	1	1	0.00312	1	1	1	1	1	1	1	1	1	1	0.0003552	7.648e-12	3.1136e-12	2.4096e-08	1	1
GO:0030029	actin filament-based process	biological_process	1	1	1	1	1	1	1	1	1	1	1	1	1	1	1	1	1	1	1	1	1	1	1	0.00877786	1	1	1	1	1	1	1	1	1	1	1	1	1	1	0.0004128	1	1	2.064e-06	2.4608e-10	3.488e-11	1	1	1
GO:0030030	cell projection organization	biological_process	1	1	1	1	1	1	1	1	1	1	1	1	1	1	2.5664e-05	1	1	0.00596406	1	1	1	0.0011136	1	1	0.001584	1	0.0002976	1	1	1	1	1	1	1	1	1	1	1	1.6704e-13	4.096e-05	1	2.56e-09	0.0003456	9.408e-08	0.00021504	1	1
GO:0030031	cell projection assembly	biological_process	1	1	1	1	1	1	1	1	1	1	1	1	1	1	1	1	1	1	1	1	1	1	1	0.0016416	2.016e-09	0.0003184	0.00536794	1	1	1	1	1	1	1	1	1	1	1	0.0011392	1	1	1	1	1.7984e-08	2.9568e-08	1	1
GO:0030036	actin cytoskeleton organization	biological_process	1	1	1	1	1	1	1	1	1	1	1	1	1	1	1	1	1	1	1	1	1	1	1	0.00616541	1	1	1	1	1	1	1	1	1	1	1	1	1	1	0.0021312	1	1	4e-06	8.736e-11	3.872e-10	1	1	1
GO:0030041	actin filament polymerization	biological_process	1	1	1	1	1	1	1	1	1	1	1	1	1	1	1	1	1	1	1	1	1	1	1	1	1	1	1	1	1	1	1	1	1	1	1	1	1	1	1	1	1	1	1	1	1	1	1
GO:0030054	cell junction	cellular_component	1	1	1	1	1	1	1	1	1	1	1	1	1	1	1	1	1	1	1	1	1	0.0014176	1	1	0.0007232	1	1	1	1	1	1	1	1	1	1	1	1	1	3.712e-05	0.00012672	1	1.1008e-08	1.024e-12	3.712e-11	1	1	1
GO:0030055	cell-substrate junction	cellular_component	1	1	1	1	1	1	1	1	1	1	1	1	1	1	1	1	1	1	1	1	1	1	1	1	1	1	1	1	1	1	1	1	1	1	1	1	1	1	1	1	1	1	1	1	1	1	1
GO:0030071	regulation of mitotic metaphase/anaphase transition	biological_process	1	1	1	1	1	1	1	1	1	1	1	1	1	1	1	1	1	1	1	1	1	1	1	1	1	1	1	1	1	1	1	1	1	1	1	0.0018848	1	0.0002128	1	1	1	1	1	1	1	1	1
GO:0030100	regulation of endocytosis	biological_process	1	1	1	1	1	1	1	1	1	1	1	1	1	1	1	1	1	1	1	1	1	1	1	1	1	1	1	1	1	1	1	1	1	1	1	1	1	1	1	1	1	1	1	1	1	1	1
GO:0030104	water homeostasis	biological_process	1	1	1	1	1	1	1	1	1	1	1	1	1	1	1	1	1	1	1	1	1	0.00465091	1	1	1	1	1	1	1	1	1	1	1	1	1	1	1	1	1	1	1	1	1	1	1	1	1
GO:0030111	regulation of Wnt signaling pathway	biological_process	1	1	1	1	1	1	1	1	1	1	1	1	1	1	1	1	1	1	1	1	1	1	1	1	1	1	1	1	1	1	1	1	1	1	1	1	1	1	1	1	1	1	1	1	1	1	1
GO:0030117	membrane coat	cellular_component	1	1	1	1	1	1	1	1	1	1	1	1	1	1	1	1	1	1	1	1	1	1	1	1	1	1	1	1	1	1	1	1	1	1	1	1	1	1	1	1	1	1	1	1	1	1	1
GO:0030118	clathrin coat	cellular_component	1	1	1	1	1	1	1	1	1	1	1	1	1	1	1	1	1	1	1	1	1	1	1	1	1	1	1	1	1	1	1	1	1	1	1	1	1	1	1	1	1	1	1	1	1	1	1
GO:0030119	AP-type membrane coat adaptor complex	cellular_component	1	1	1	1	1	1	1	1	1	1	1	1	1	1	1	1	1	1	1	1	1	1	1	1	1	1	1	1	1	1	1	1	1	1	1	1	1	1	1	1	1	1	1	1	1	1	1
GO:0030120	vesicle coat	cellular_component	1	1	1	1	1	1	1	1	1	1	1	1	1	1	1	1	1	1	1	1	1	1	1	1	1	1	1	1	1	1	1	1	1	1	1	1	1	1	1	1	1	1	1	1	1	1	1
GO:0030125	clathrin vesicle coat	cellular_component	1	1	1	1	1	1	1	1	1	1	1	1	1	1	1	1	1	1	1	1	1	1	1	1	1	1	1	1	1	1	1	1	1	1	1	1	1	1	1	1	1	1	1	1	1	1	1
GO:0030126	COPI vesicle coat	cellular_component	1	1	1	1	1	1	1	1	1	1	1	1	1	1	1	1	1	1	1	1	1	1	1	1	1	1	1	1	1	1	1	1	1	1	1	1	1	1	1	1	1	1	1	1	1	1	1
GO:0030131	clathrin adaptor complex	cellular_component	1	1	1	1	1	1	1	1	1	1	1	1	1	1	1	1	1	1	1	1	1	1	1	1	1	1	1	1	1	1	1	1	1	1	1	1	1	1	1	1	1	1	1	1	1	1	1
GO:0030132	clathrin coat of coated pit	cellular_component	1	1	1	1	1	1	1	1	1	1	1	1	1	1	1	1	1	1	1	1	1	1	1	1	1	1	1	1	1	1	1	1	1	1	1	1	1	1	1	1	1	1	1	1	1	1	1
GO:0030133	transport vesicle	cellular_component	1	1	1	1	1	1	1	1	1	1	1	1	1	1	1	1	1	1	1	1	1	1	1	1	1	1	1	1	1	1	1	1	1	1	1	1	1	1	1	1	1	1	1	1	1	1	1
GO:0030135	coated vesicle	cellular_component	1	1	1	1	1	1	1	1	1	1	1	1	1	1	1	1	1	1	1	1	1	1	1	1	1	1	1	1	1	1	1	1	1	1	1	1	1	1	1	1	1	1	1	1	1	1	1
GO:0030136	clathrin-coated vesicle	cellular_component	1	1	1	1	1	1	1	1	1	1	1	1	1	1	1	1	1	1	1	1	1	1	1	1	1	1	1	1	0.0004448	0.0029216	1	1	1	1	1	1	1	1	1	1	1	1	1	1	1	0.00754237	1
GO:0030137	COPI-coated vesicle	cellular_component	1	1	1	1	1	1	1	1	1	1	1	1	1	1	1	1	1	1	1	1	1	1	1	1	1	1	1	1	1	1	1	1	1	1	1	1	1	1	1	1	1	1	1	1	1	1	1
GO:0030139	endocytic vesicle	cellular_component	1	1	1	1	1	1	1	1	1	1	1	1	1	1	1	1	1	1	1	1	1	1	1	1	1	1	1	1	1	1	1	1	1	1	1	1	1	1	1	1	1	1	1	1	1	1	1
GO:0030140	trans-Golgi network transport vesicle	cellular_component	1	1	1	1	1	1	1	1	1	1	1	1	1	1	1	1	1	1	1	1	1	1	1	1	1	1	1	1	1	1	1	1	1	1	1	1	1	1	1	1	1	1	1	1	1	1	1
GO:0030141	secretory granule	cellular_component	1	1	1	1	1	1	1	1	1	1	1	1	1	1	1	1	1	1	1	1	1	1	1	1	1	1	1	1	1	1	1	1	1	1	1	1	1	1	1	1	1	1	1	1	1	1	1
GO:0030145	manganese ion binding	molecular_function	1	1	1	1	1	1	1	1	1	1	1	1	1	1	1	1	1	1	1	1	1	1	1	1	1	1	1	1	1	1	1	1	1	1	1	1	1	1	1	1	1	1	1	1	1	1	1
GO:0030148	sphingolipid biosynthetic process	biological_process	1	1	1	1	1	1	1	1	1	1	1	1	1	1	1	1	1	1	1	1	1	1	1	1	1	1	1	1	1	1	1	1	1	1	1	1	1	1	1	1	1	1	1	1	1	1	1
GO:0030149	sphingolipid catabolic process	biological_process	1	1	1	1	1	1	1	1	1	1	1	1	1	1	1	1	1	1	1	1	1	1	1	1	1	1	1	1	1	1	1	1	1	1	1	1	1	1	1	1	1	1	1	1	1	1	1
GO:0030151	molybdenum ion binding	molecular_function	1	1	1	1	1	1	1	1	1	1	1	1	1	1	1	1	1	1	1	1	1	1	1	1	1	1	1	1	1	1	1	1	1	1	1	1	1	1	1	1	1	1	1	1	1	1	1
GO:0030154	cell differentiation	biological_process	1	1	1	1	1	1	0.00766077	1	1	1	1	1	1	0.0026624	0.00014816	1	1	4.032e-11	1.248e-05	1	0.0007552	0.0010304	1	0.0006752	1	1	1	1	1	1	1	1	6.272e-06	1	1	3.1104e-08	1	1	9.92e-08	0.00021536	3.0432e-05	1.5232e-17	9.216e-09	2.608e-05	1	1	1
GO:0030155	regulation of cell adhesion	biological_process	1	1	1	1	1	1	1	1	1	1	1	1	1	1	1	1	1	1	1	1	1	1	1	1	1	1	1	1	1	1	1	1	1	1	1	1	1	1	1	1	1	1	1	1	1	1	1
GO:0030163	protein catabolic process	biological_process	2.9056e-06	1.9776e-13	7.488e-10	3.488e-05	2.2368e-05	1	1	1	1	1	1	1	1	1	1	1	1	1	1	1	1	1	1	1	1	1	1	1	1	1	1	1	1.6192e-05	9.632e-06	1	1	1	1	1	1	1	1	1	1	1	1	1
GO:0030170	pyridoxal phosphate binding	molecular_function	1	1	1	1	1	1	1	1	1	1	1	1	1	1	1	1	1	1	1	1	1	1	1	1	1	1	1	1	1	1	1	1	1	1	1	1	1	1	1	1	1	1	1	1	1	1	1
GO:0030173	integral component of Golgi membrane	cellular_component	1	1	1	1	1	1	1	1	1	1	1	1	1	1	1	1	1	1	1	1	1	1	1	1	1	1	1	1	1	1	1	1	1	1	1	1	1	1	1	1	1	1	1	1	1	1	1
GO:0030176	integral component of endoplasmic reticulum membrane	cellular_component	1	1	1	1	1	1	1	1	1	1	1	1	1	1	1	1	1	1	1	1	1	1	1	1	1	1	1	1	1	1	1	1	1	1	1	1	1	1	1	1	1	1	1	1	1	1	1
GO:0030182	neuron differentiation	biological_process	1	1	1	1	1	1	1	1	1	1	1	1	1	1	0.0004832	1	1	1.6736e-06	0.0003616	1	0.0006048	0.00016992	1	1	1	1	1	1	1	1	1	1	1	1	1	1	1	1	1.8912e-09	3.648e-05	0.00013824	3.36e-15	0.00021984	0.00910339	1	1	1
GO:0030198	extracellular matrix organization	biological_process	1	1	1	1	1	1	1	1	1	1	1	1	1	1	1	1	1	1	1	1	1	1	1	1	1	1	1	1	1	1	1	1	1	1	1	1	1	1	1	1	1	1	1	1	1	1	1
GO:0030203	glycosaminoglycan metabolic process	biological_process	1	1	1	1	1	1	1	1	1	1	1	1	1	1	1	1	1	1	1	1	1	1	1	1	1	1	1	1	1	1	1	1	1	1	1	1	1	1	1	1	1	1	1	1	1	1	1
GO:0030234	enzyme regulator activity	molecular_function	1	1	1	1	1	1	1	1	1	1	1	1	1	7.68e-05	2.304e-10	1	1	1	1	1	1	0.00011328	1	1	1	1	1	1	1	1	0.00999446	1	1	1	1	1	1	1	0.00024192	0.0009856	1	0.00523242	1	0.00598634	4.704e-05	1	1
GO:0030239	myofibril assembly	biological_process	1	1	1	1	1	1	1	1	1	1	1	1	1	1	1	1	1	1	1	1	1	1	1	0.0005344	1	1	1	1	1	1	1	1	1	1	1	1	1	1	1	1	1	0.0009504	5.216e-09	2.0224e-09	1	1	1
GO:0030246	carbohydrate binding	molecular_function	1	1	1	1	1	1	1	1	1	1	1	1	1	1	1	1	1	1	1	1	1	1	1	1	1	1	1	1	1	1	1	1	1	1	1	1	1	1	1	1	1	1	1	1	1	1	1
GO:0030247	polysaccharide binding	molecular_function	1	1	1	1	1	1	1	1	1	1	1	1	1	1	1	1	1	1	1	1	1	1	1	1	1	1	1	1	1	1	1	1	1	1	1	1	1	1	1	2.416e-05	1	1	1	1	1	1	0.00941014
GO:0030258	lipid modification	biological_process	1	1	1	1	1	1	1	1	1	1	0.0008192	1	1	1	1	1	1	1	1	1	1	0.0079231	1	1	1	1	1	1	1	1	1	0.0006112	1	1	1	1	1	1	1	1	1	1	1	1	1	1	1
GO:0030259	lipid glycosylation	biological_process	1	1	1	1	1	1	1	1	1	1	0.0020992	1	1	1	1	1	0.0040584	1	1	1	1	1	1	1	1	1	1	1	1	1	1	0.00399616	1	1	1	1	1	1	1	1	1	1	1	1	1	1	1
GO:0030261	chromosome condensation	biological_process	1	1	1	1	1	1	1	1	1	1	1	1	1	1	1	1	1	1	1	1	1	1	1	1	1	1	1	1	1	1	1	1	1	1	1	0.000832	0.00607542	0.0057943	1	1	1	1	1	1	1	1	1
GO:0030262	apoptotic nuclear changes	biological_process	1	1	1	1	1	1	1	1	1	1	1	1	1	1	1	1	1	1	1	1	1	1	1	1	1	1	1	1	1	1	1	1	1	1	1	1	1	1	1	1	1	1	1	1	1	1	1
GO:0030288	outer membrane-bounded periplasmic space	cellular_component	1	1	1	1	1	1	1	1	1	1	1	1	1	1	1	1	1	1	1	1	1	1	1	1	1	1	1	6.08e-06	1	1	1	1	1	1	1	1	1	1	1	1	1	1	1	1	1	1	1
GO:0030307	positive regulation of cell growth	biological_process	1	1	1	1	1	1	1	1	1	1	1	1	1	1	1	1	1	1	1	1	1	1	1	1	1	1	1	1	1	1	1	1	1	1	1	1	1	1	1	1	1	0.0003488	1	1	1	1	1
GO:0030312	external encapsulating structure	cellular_component	1	1	1	1	1	1	1	1	1	1	1	1	1	1	1	1	1	1	1	1	1	1	1	1	1	1	1	3.712e-06	1	1	1	1	1	1	1	1	1	1	1	1	1	1	1	1	1	1	1
GO:0030313	cell envelope	cellular_component	1	1	1	1	1	1	1	1	1	1	1	1	1	1	1	1	1	1	1	1	1	1	1	1	1	1	1	8.224e-07	1	1	1	1	1	1	1	1	1	1	1	1	1	1	1	1	1	1	1
GO:0030330	DNA damage response	signal transduction by p53 class mediator	biological_process	1	1	1	1	1	1	1	1	1	1	1	1	1	1	1	1	1	1	1	1	1	1	1	1	1	1	1	1	1	1	1	1	1	1	1	1	1	1	1	1	1	1	1	1	1	1
GO:0030334	regulation of cell migration	biological_process	1	1	1	1	1	1	1	1	1	1	1	1	1	1	1	1	1	1	1	1	1	1	1	0.0006048	1	1	1	1	1	1	1	1	1	1	1	1	1	1	1	1	1	2.0768e-05	1	1	1	1	1
GO:0030414	peptidase inhibitor activity	molecular_function	1	1	1	1	1	1	1	1	1	1	1	1	1	0.0008288	7.456e-10	1	1	1	1	1	1	0.00615094	1	1	1	0.00625718	1	1	1	1	1	1	1	1	1	1	1	1	1	0.0028064	1	1	0.00951363	1	0.00436323	1	1
GO:0030421	defecation	biological_process	1	1	1	1	1	1	1	1	1	1	1	1	1	1	1	1	1	1	1	1	1	1	1	1	1	1	1	1	1	1	1	1	1	1	1	1	1	1	1	1	1	1	1	1	1	1	1
GO:0030424	axon	cellular_component	1	1	1	1	1	1	1	1	1	1	1	1	1	1	1	1	1	1	1	1	1	1	1	1	1	1	1	1	1	1	1	1	1	1	1	1	1	1	1	1	1	0.00567661	1	0.00652566	1	0.0004608	1
GO:0030425	dendrite	cellular_component	1	1	1	1	1	1	1	1	1	1	1	1	1	1	1	1	1	1	1	1	1	1	1	1	1	1	1	1	1	1	1	1	1	1	1	1	1	1	1	1	1	1	1	1	1	1	1
GO:0030427	site of polarized growth	cellular_component	1	1	1	1	1	1	1	1	1	1	1	1	1	1	1	1	1	1	1	1	1	1	1	1	1	1	1	1	1	1	1	1	1	1	1	1	1	1	1	1	1	1	1	1	1	1	1
GO:0030433	ER-associated ubiquitin-dependent protein catabolic process	biological_process	1	1	1	1	1	1	1	1	1	1	1	1	1	1	1	1	1	1	1	1	1	1	1	1	1	1	1	1	1	1	1	1	1	1	1	1	1	1	1	1	1	1	1	1	1	1	1
GO:0030496	midbody	cellular_component	1	1	1	1	1	1	1	1	1	1	1	1	1	1	1	1	1	1	1	1	1	1	1	1	1	1	1	1	1	1	1	1	1	1	1	1	1	1	1	1	1	1	1	1	1	1	1
GO:0030512	negative regulation of transforming growth factor beta receptor signaling pathway	biological_process	1	1	1	1	1	1	1	1	1	1	1	1	1	1	1	1	1	1	1	1	1	1	1	1	1	1	1	1	1	1	1	1	1	1	1	1	1	1	1	1	1	1	1	1	1	1	1
GO:0030516	regulation of axon extension	biological_process	1	1	1	1	1	1	1	1	1	1	1	1	1	1	0.00763002	1	1	1	1	1	1	1	1	1	1	1	1	1	1	1	1	1	1	1	1	1	1	1	1	1	1	1	1	1	1	1	1
GO:0030528	obsolete transcription regulator activity	molecular_function	1	1	1	1	1	1	1	0.0003424	1	1	1	1	1	1	1	1	1	1.9008e-10	3.232e-05	1	2.176e-06	1	1	1	1	1	1	1	1	1	1	2.5152e-08	1	1	1	4.096e-05	1	1.3632e-10	1	7.136e-08	1.6064e-17	7.136e-09	1	1	1	1	1
GO:0030529	ribonucleoprotein complex	cellular_component	1	1	1	1	1	1	1	1	1	1	1	1	1	1	1	1	1	1	1	1	1	1	1	1	1	1	1	1	1	1	1	1	1	1	1	1	1	1	1	1	3.84e-07	1	1	1	1	1	1
GO:0030539	male genitalia development	biological_process	1	1	1	1	1	1	1	1	1	1	1	1	1	1	1	1	1	1	1	1	1	1	1	1	1	1	1	1	1	1	1	1	1	1	1	1	1	1	1	1	1	1	1	1	1	1	1
GO:0030554	adenyl nucleotide binding	molecular_function	5.632e-07	4.832e-10	0.00022784	1	1	0.0014592	1	1	1	1	1	1	1	1	1	1	1	1	1	1	1	1	1	1	1	1	1	1	1	1	1	1	1.5296e-13	1	1	1	1	1	4.576e-10	1	1	1	1	1	1	1	1
GO:0030594	neurotransmitter receptor activity	molecular_function	1	1	1	1	1	1	1	1	1	1	1	1	1	1	1	1	1	1	1	1	1	1	1	1	1	1	1	9.6e-06	1.28e-09	1.6576e-06	1	1	1	1	1	1	1	1	1	1	1	1	1	1	1	0.00340064	1
GO:0030658	transport vesicle membrane	cellular_component	1	1	1	1	1	1	1	1	1	1	1	1	1	1	1	1	1	1	1	1	1	1	1	1	1	1	1	1	1	1	1	1	1	1	1	1	1	1	1	1	1	1	1	1	1	1	1
GO:0030659	cytoplasmic vesicle membrane	cellular_component	1	1	1	1	1	1	1	1	1	1	1	1	1	1	1	1	1	1	1	1	1	1	1	1	1	1	1	1	1	1	1	1	1	1	1	1	1	1	1	1	1	1	1	1	1	1	1
GO:0030660	Golgi-associated vesicle membrane	cellular_component	1	1	1	1	1	1	1	1	1	1	1	1	1	1	1	1	1	1	1	1	1	1	1	1	1	1	1	1	1	1	1	1	1	1	1	1	1	1	1	1	1	1	1	1	1	1	1
GO:0030662	coated vesicle membrane	cellular_component	1	1	1	1	1	1	1	1	1	1	1	1	1	1	1	1	1	1	1	1	1	1	1	1	1	1	1	1	1	1	1	1	1	1	1	1	1	1	1	1	1	1	1	1	1	1	1
GO:0030663	COPI-coated vesicle membrane	cellular_component	1	1	1	1	1	1	1	1	1	1	1	1	1	1	1	1	1	1	1	1	1	1	1	1	1	1	1	1	1	1	1	1	1	1	1	1	1	1	1	1	1	1	1	1	1	1	1
GO:0030665	clathrin-coated vesicle membrane	cellular_component	1	1	1	1	1	1	1	1	1	1	1	1	1	1	1	1	1	1	1	1	1	1	1	1	1	1	1	1	1	1	1	1	1	1	1	1	1	1	1	1	1	1	1	1	1	1	1
GO:0030674	protein binding	bridging	molecular_function	1	1	1	1	1	1	1	1	1	1	1	1	1	1	1	1	1	1	1	1	1	1	1	1	1	1	1	1	1	1	1	1	1	1	1	1	1	1	1	1	1	1	1	1	1	1
GO:0030684	preribosome	cellular_component	1	1	1	1	1	1	1	1	1	1	1	1	1	1	1	1	1	1	1	1	1	1	1	1	1	1	1	1	1	1	1	1	1	1	1	1	1	1	1	1	1	1	1	1	1	1	1
GO:0030695	GTPase regulator activity	molecular_function	1	1	1	1	1	1	1	1	1	1	1	1	1	1	1	1	1	1	1	1	1	1	1	1	1	1	1	1	1	1	1	1	1	1	1	1	1	1	0.0006304	1	1	1	1	1	1	1	1
GO:0030703	eggshell formation	biological_process	1	1	1	1	1	1	1	1	1	1	1	1	1	1	1	1	1	1	1	1	1	1	1	1	1	1	1	1	1	1	1	1	1	1	1	1	1	1	1	1	1	1	1	1	1	1	1
GO:0030704	vitelline membrane formation	biological_process	1	1	1	1	1	1	1	1	1	1	1	1	1	1	1	1	1	1	1	1	1	1	1	1	1	1	1	1	1	1	1	1	1	1	1	1	1	1	1	1	1	1	1	1	1	1	1
GO:0030705	cytoskeleton-dependent intracellular transport	biological_process	1	1	1	1	1	1	1	1	1	1	1	1	1	1	1	1	1	1	1	1	1	1	1	1	0.0017536	0.0019392	1	1	1	1	1	1	1	1	1	1	1	1	1	1	1	1	1	0.00403814	4.608e-05	1	1
GO:0030728	ovulation	biological_process	1	1	1	1	1	1	1	1	1	1	1	1	1	1	1	1	1	1	1	1	1	1	1	1	1	1	1	1	1	1	1	1	1	1	1	1	1	1	1	1	1	1	1	1	1	1	1
GO:0030811	regulation of nucleotide catabolic process	biological_process	1	1	1	1	1	1	1	1	1	1	1	1	1	1	1	1	1	1	1	1	1	1	1	1	1	1	1	1	1	1	1	1	1	1	1	1	1	1	1	1	1	1	1	1	1	1	1
GO:0030832	regulation of actin filament length	biological_process	1	1	1	1	1	1	1	1	1	1	1	1	1	1	1	1	1	1	1	1	1	1	1	1	1	1	1	1	1	1	1	1	1	1	1	1	1	1	1	1	1	1	1	1	1	1	1
GO:0030833	regulation of actin filament polymerization	biological_process	1	1	1	1	1	1	1	1	1	1	1	1	1	1	1	1	1	1	1	1	1	1	1	1	1	1	1	1	1	1	1	1	1	1	1	1	1	1	1	1	1	1	1	1	1	1	1
GO:0030838	positive regulation of actin filament polymerization	biological_process	1	1	1	1	1	1	1	1	1	1	1	1	1	1	1	1	1	1	1	1	1	1	1	1	1	1	1	1	1	1	1	1	1	1	1	1	1	1	1	1	1	1	1	1	1	1	1
GO:0030855	epithelial cell differentiation	biological_process	1	1	1	1	1	1	1	1	1	1	1	1	1	1	1	1	1	1	1	1	1	1	1	1	1	1	1	1	1	1	1	1	1	1	1	1	1	1	0.0080744	1	1	1	1	0.00993696	1	1	1
GO:0030880	RNA polymerase complex	cellular_component	1	1	1	1	1	1	1	1	1	1	1	1	1	1	1	1	1	1	1	1	1	1	1	1	1	1	1	1	1	1	1	1	1	1	1	1	1	1	1	1	1	1	1	1	1	1	1
GO:0030968	endoplasmic reticulum unfolded protein response	biological_process	1	1	1	1	1	1	1	1	1	1	1	1	1	1	1	1	1	1	1	1	1	1	1	1	1	1	1	1	1	1	1	1	1	1	1	1	1	1	1	1	1	1	1	1	1	1	1
GO:0030971	receptor tyrosine kinase binding	molecular_function	1	1	1	1	1	1	1	1	1	1	1	1	1	1	1	1	1	1	1	1	1	1	1	1	1	1	1	1	1	1	1	1	1	1	1	1	1	1	1	1	1	1	1	1	1	1	1
GO:0030976	thiamine pyrophosphate binding	molecular_function	1	1	1	1	1	1	1	1	1	1	1	1	1	1	1	1	1	1	1	1	1	1	1	1	1	1	1	1	1	1	1	1	1	1	1	1	1	1	1	1	1	1	1	1	1	1	1
GO:0030983	mismatched DNA binding	molecular_function	1	1	1	1	1	1	1	1	1	1	1	1	1	1	1	1	1	1	1	1	1	1	1	1	1	1	1	1	1	1	1	1	1	1	1	1	1	1	1	1	1	1	1	1	1	1	1
GO:0031012	extracellular matrix	cellular_component	1	1	1	1	1	1	1	1	1	1	1	1	1	1	0.0003328	1	1	1	1	1	1	1	1	0.0003968	1	1	1	1	1	1	1	1	1	1	1	1	1	1	7.104e-07	5.536e-09	0.00023488	8.48e-10	8.256e-11	1.8528e-09	1	1	1
GO:0031023	microtubule organizing center organization	biological_process	1	1	1	1	1	1	1	1	1	1	1	1	1	1	1	1	1	1	1	1	1	1	1	1	1	1	1	1	1	1	1	1	1	1	1	1	0.0019968	1	1	1	1	1	1	1	1	1	1
GO:0031032	actomyosin structure organization	biological_process	1	1	1	1	1	1	1	1	1	1	1	1	1	1	1	1	1	1	1	1	1	1	1	0.0005344	1	1	1	1	1	1	1	1	1	1	1	1	1	1	1	1	1	0.0009504	5.216e-09	2.0224e-09	1	1	1
GO:0031033	myosin filament organization	biological_process	1	1	1	1	1	1	1	1	1	1	1	1	1	1	1	1	1	1	1	1	1	1	1	0.00549718	1	1	1	1	1	1	1	1	1	1	1	1	1	1	1	1	1	1	6.784e-05	1.2384e-06	1	1	1
GO:0031034	myosin filament assembly	biological_process	1	1	1	1	1	1	1	1	1	1	1	1	1	1	1	1	1	1	1	1	1	1	1	0.00549718	1	1	1	1	1	1	1	1	1	1	1	1	1	1	1	1	1	1	6.784e-05	1.2384e-06	1	1	1
GO:0031047	gene silencing by RNA	biological_process	1	5.216e-07	1.4272e-05	1	1	1	1	1	1	1	1	1	1	1	1	1	1	1	1	1	1	1	1	1	1	1	1	1	1	1	1	1	0.00755539	1	1	1	1	1	1	1	1	1	1	1	1	1	1
GO:0031050	dsRNA fragmentation	biological_process	1	1	1	1	1	1	1	1	1	1	1	1	1	1	1	1	1	1	1	1	1	1	1	1	1	1	1	1	1	1	1	1	1	1	1	1	1	1	1	1	1	1	1	1	1	1	1
GO:0031072	heat shock protein binding	molecular_function	1	1	1	1	1	1	1	1	1	1	1	1	1	1	1	1	1	1	1	1	1	1	1	1	1	1	1	1	1	1	1	1	1	1	1	1	1	1	1	1	1	1	1	1	1	1	1
GO:0031090	organelle membrane	cellular_component	2.6112e-05	1.3472e-10	1	1	1	1	1	1	1	1	1	1	1	1	1	1	1	1	1	1	1	1	1	1	1	1	1	1	1	1	1	1	0.0007072	1	1	1	1	1	1	1	1	1	1	1	1	1	1
GO:0031098	stress-activated protein kinase signaling cascade	biological_process	1	1	1	1	1	1	1	1	1	1	1	1	1	1	1	1	1	1	1	1	1	1	1	1	1	1	1	1	1	1	1	1	1	1	1	1	1	1	1	1	1	1	1	1	1	1	1
GO:0031109	microtubule polymerization or depolymerization	biological_process	1	1	1	1	1	1	1	1	1	1	1	1	1	1	1	1	1	1	1	1	1	1	1	1	1	1	1	1	1	1	1	1	1	1	1	1	1	1	1	1	1	1	1	1	1	1	1
GO:0031110	regulation of microtubule polymerization or depolymerization	biological_process	1	1	1	1	1	1	1	1	1	1	1	1	1	1	1	1	1	1	1	1	1	1	1	1	1	1	1	1	1	1	1	1	1	1	1	1	1	1	1	1	1	1	1	1	1	1	1
GO:0031111	negative regulation of microtubule polymerization or depolymerization	biological_process	1	1	1	1	1	1	1	1	1	1	1	1	1	1	1	1	1	1	1	1	1	1	1	1	1	1	1	1	1	1	1	1	1	1	1	1	1	1	1	1	1	1	1	1	1	1	1
GO:0031114	regulation of microtubule depolymerization	biological_process	1	1	1	1	1	1	1	1	1	1	1	1	1	1	1	1	1	1	1	1	1	1	1	1	1	1	1	1	1	1	1	1	1	1	1	1	1	1	1	1	1	1	1	1	1	1	1
GO:0031122	cytoplasmic microtubule organization	biological_process	1	1	1	1	1	1	1	1	1	1	1	1	1	1	1	1	1	1	1	1	1	1	1	1	1	1	1	1	1	1	1	1	1	1	1	1	1	1	1	1	1	1	1	1	1	1	1
GO:0031123	RNA 3'-end processing	biological_process	1	1	1	1	1	1	1	1	1	1	1	1	1	1	1	1	1	1	1	1	1	1	1	1	1	1	1	1	1	1	1	1	1	1	1	1	1	1	1	1	1	1	1	1	1	1	1
GO:0031127	alpha-(1	2)-fucosyltransferase activity	molecular_function	1	1	1	1	1	1	1	1	1	1	1	1	1	1	1	1	1	1	1	1	1	1	1	1	1	1	1	1	1	1	1	1	1	1	1	1	1	1	1	1	1	1	1	1	1	1
GO:0031143	pseudopodium	cellular_component	1	1	1	1	1	1	1	1	1	1	1	1	1	1	1	1	1	1	1	1	1	1	1	1	1	1	1	1	1	1	1	1	1	1	1	1	1	1	1	1	1	1	1	1	1	1	1
GO:0031163	metallo-sulfur cluster assembly	biological_process	1	1	1	1	1	1	1	1	1	1	1	1	1	1	1	1	1	1	1	1	1	1	1	1	1	1	1	1	1	1	1	1	1	1	1	1	1	1	1	1	1	1	1	1	1	1	1
GO:0031167	rRNA methylation	biological_process	1	1	1	1	1	1	1	1	1	1	1	1	1	1	1	1	1	1	1	1	1	1	1	1	1	1	1	1	1	1	1	1	1	1	1	1	1	1	1	1	1	1	1	1	1	1	1
GO:0031175	neuron projection development	biological_process	1	1	1	1	1	1	1	1	1	1	1	1	1	1	0.000448	1	1	0.0016672	1	1	1	0.0007328	1	1	1	1	1	1	1	1	1	1	1	1	1	1	1	1	1.3856e-10	0.00360182	1	7.68e-10	1	1	1	1	1
GO:0031177	phosphopantetheine binding	molecular_function	1	1	1	1	1	1	1	1	1	1	1	1	1	1	1	1	1	1	1	1	1	1	1	1	1	1	1	1	1	1	1	1	1	1	1	1	1	1	1	1	1	1	1	1	1	1	1
GO:0031224	intrinsic component of membrane	cellular_component	1	1	1	1	1	1	1	1	1	1	1	1	1	1	1	1	1	1	1	1	1	1	1	1	1	1	3.1552e-05	3.392e-17	2.0576e-58	3.616e-50	8.256e-07	1	1	1	1	1	1	1	1	1	1	1	1	1	0.0011872	9.504e-17	1
GO:0031226	intrinsic component of plasma membrane	cellular_component	1	1	1	1	0.0017216	1	1	1	1	1	1	1	1	1	1	1	1	1	1	1	1	1	1	1	1	1	1	1	0.0004416	1	1	1	1	1	1	1	1	1	1	1	1	1	1	1	1	1	1
GO:0031227	intrinsic component of endoplasmic reticulum membrane	cellular_component	1	1	1	1	1	1	1	1	1	1	1	1	1	1	1	1	1	1	1	1	1	1	1	1	1	1	1	1	1	1	1	1	1	1	1	1	1	1	1	1	1	1	1	1	1	1	1
GO:0031228	intrinsic component of Golgi membrane	cellular_component	1	1	1	1	1	1	1	1	1	1	1	1	1	1	1	1	1	1	1	1	1	1	1	1	1	1	1	1	1	1	1	1	1	1	1	1	1	1	1	1	1	1	1	1	1	1	1
GO:0031252	cell leading edge	cellular_component	1	1	1	1	1	1	1	1	1	1	1	1	1	1	1	1	1	1	1	1	1	1	1	1	1	1	1	1	1	1	1	1	1	1	1	1	1	1	1	1	1	1	1	1	1	1	1
GO:0031253	cell projection membrane	cellular_component	1	1	1	1	1	1	1	1	1	1	1	1	1	1	1	1	1	1	1	1	1	1	1	1	1	1	1	1	1	1	1	1	1	1	1	1	1	1	1	1	1	1	1	1	1	1	1
GO:0031267	small GTPase binding	molecular_function	1	1	1	1	1	1	1	1	1	1	1	1	1	1	1	1	1	1	1	1	1	1	1	1	1	1	1	1	1	1	1	1	1	1	1	1	1	1	0.0012512	1	1	1	1	1	1	1	1
GO:0031300	intrinsic component of organelle membrane	cellular_component	1	0.00456963	1	1	1	1	1	1	1	1	1	1	1	1	1	1	1	1	1	1	1	1	1	1	1	1	1	1	1	1	1	1	1	1	1	1	1	1	1	1	1	1	1	1	1	1	1
GO:0031301	integral component of organelle membrane	cellular_component	1	1	1	1	1	1	1	1	1	1	1	1	1	1	1	1	1	1	1	1	1	1	1	1	1	1	1	1	1	1	1	1	1	1	1	1	1	1	1	1	1	1	1	1	1	1	1
GO:0031323	regulation of cellular metabolic process	biological_process	1	1	1	1	1	1	1	1	1	1	1	1	1	1	1	1	9.792e-05	1.7216e-08	2.6592e-05	1	5.12e-10	1	1	0.00984093	1	1	1	1	1	1	1	4.416e-08	1	1	0.00833222	0.0016544	1	1	1	1	0.00010432	3.808e-08	0.00718634	1	1	1	1
GO:0031324	negative regulation of cellular metabolic process	biological_process	0.0018176	0.00694659	1	1	1	1	1	1	1	1	1	1	1	1	1	1	1	1	1	1	1	1	1	1	1	1	1	1	1	1	1	1	0.00023552	1	1	3.808e-05	1	1	1	1	1	1	1	1	1	1	1
GO:0031325	positive regulation of cellular metabolic process	biological_process	1	1	1	1	1	1	1	1	1	0.00744518	1	1	1	1	1	1	1	0.00016416	1	1	0.0017568	1	1	1	1	1	1	1	1	1	1	2.3648e-05	1	1	1	1	1	1	1	1	0.0012672	0.0005472	1	1	1	1	1
GO:0031326	regulation of cellular biosynthetic process	biological_process	1	1	1	1	1	1	1	1	1	1	1	1	1	1	1	1	5.184e-06	1.184e-08	0.001184	1	3.0656e-07	1	1	0.0018816	1	1	1	1	1	1	1	6.176e-09	1	1	0.0010272	0.0005376	1	1	1	1	2.9088e-05	4.48e-07	1	1	1	1	1
GO:0031327	negative regulation of cellular biosynthetic process	biological_process	1	1	1	1	1	1	1	1	1	1	1	1	1	1	1	1	1	1	1	1	1	1	1	1	1	1	1	1	1	1	1	1	0.00705155	1	1	1.8592e-05	1	1	1	1	1	1	1	1	1	1	1
GO:0031328	positive regulation of cellular biosynthetic process	biological_process	1	1	1	1	1	1	1	1	1	0.00528854	1	1	1	1	1	1	1	7.648e-05	1	1	0.000976	1	1	1	1	1	1	1	1	1	1	9.248e-06	1	1	1	1	1	1	1	1	0.0004768	0.00027296	1	1	1	1	1
GO:0031329	regulation of cellular catabolic process	biological_process	1	1	1	1	1	1	1	1	1	1	1	1	1	1	1	1	1	1	1	1	1	1	1	1	1	1	1	1	1	1	1	1	1	1	1	1	1	1	1	1	1	1	1	1	1	1	1
GO:0031334	positive regulation of protein complex assembly	biological_process	1	1	1	1	1	1	1	1	1	1	1	1	1	1	1	1	1	1	1	1	1	1	1	1	1	1	1	1	1	1	1	1	1	1	1	1	1	1	1	1	1	1	1	1	1	1	1
GO:0031344	regulation of cell projection organization	biological_process	1	1	1	1	1	1	1	1	1	1	1	1	1	1	1	1	1	1	1	1	1	1	1	1	1	1	1	1	1	1	1	1	1	1	1	1	1	1	1	1	1	1	1	0.0013792	1	1	1
GO:0031399	regulation of protein modification process	biological_process	1	1	1	1	1	1	1	1	1	1	1	1	1	1	1	1	1	1	1	1	1	1	1	1	1	1	1	1	1	1	1	1	1	1	1	1	1	1	1	1	1	1	1	1	1	1	1
GO:0031401	positive regulation of protein modification process	biological_process	1	1	1	1	1	1	1	1	1	1	1	1	1	1	1	1	1	1	1	1	1	1	1	1	1	1	1	1	1	1	1	1	1	1	1	1	1	1	1	1	1	1	1	1	1	1	1
GO:0031406	carboxylic acid binding	molecular_function	1	1	1	1	1	1	1	1	1	1	1	1	1	1	1	1	1	1	1	1	1	1	1	1	1	1	1	1	1	1	1	1	1	1	1	1	1	1	1	1	1	1	1	1	1	1	1
GO:0031410	cytoplasmic vesicle	cellular_component	1	1	1	1	1	1	1	1	1	1	1	1	1	1	1	1	1	1	1	1	1	1	1	1	1	1	1	1	1	1	1	1	1	1	1	1	1	1	1	1	1	1	1	1	1	1	1
GO:0031418	L-ascorbic acid binding	molecular_function	1	1	1	1	1	1	1	1	1	1	0.0039441	1	1	1	1	1	1	1	1	1	1	1	1	1	1	1	1	1	1	1	1	1	1	1	1	1	1	1	1	1	1	1	1	1	1	1	1
GO:0031430	M band	cellular_component	1	1	1	1	1	1	1	1	1	1	1	1	1	1	1	1	1	1	1	1	1	1	1	0.00496429	1	1	1	1	1	1	1	1	1	1	1	1	1	1	1	1	1	1	2.5824e-08	0.0006432	1	1	1
GO:0031461	cullin-RING ubiquitin ligase complex	cellular_component	1	1	1	1	1	1	1	1	1	1	1	1	1	1	1	1	1	1	1	1	1	1	1	1	1	1	1	1	1	1	1	1	1	1	1	1	1	1	1	1	1	1	1	1	1	1	1
GO:0031497	chromatin assembly	biological_process	1	1	1	1	1	1	2.064e-14	3.0784e-16	1	9.44e-19	1	1	1	1	1	1	1	1.056e-12	5.792e-07	0.0013728	1	1	1	1	1	1	1	1	1	1	1	1.7984e-06	1	1	1	1.2224e-12	1.6256e-56	1.3824e-60	1	1.0432e-30	2.5728e-32	1	1	1	1	1	1
GO:0031513	nonmotile primary cilium	cellular_component	1	1	1	1	1	1	1	1	1	1	1	1	1	1	1	1	1	1	1	1	1	1	1	1	0.0012608	1	1	1	1	1	1	1	1	1	1	1	1	1	1	1	1	1	1	1	1	1	1
GO:0031570	DNA integrity checkpoint	biological_process	1	1	1	1	1	1	1	1	1	1	1	1	1	1	1	1	1	1	1	1	1	1	1	1	1	1	1	1	1	1	1	1	1	1	1	1	1	1	1	1	1	1	1	1	1	1	1
GO:0031589	cell-substrate adhesion	biological_process	1	1	1	1	1	1	1	1	1	1	1	1	1	1	2.6144e-07	1	1	1	1	1	1	1	1	1	0.00963914	1	1	1	1	1	1	1	1	1	1	1	1	1	0.0012512	0.0064527	1	1.952e-05	0.0006112	0.0031712	1	1	1
GO:0031594	neuromuscular junction	cellular_component	1	1	1	1	1	1	1	1	1	1	1	1	1	1	1	1	1	1	1	1	1	1	1	1	1	1	1	1	1	1	1	1	1	1	1	1	1	1	1	1	1	1	1	1	1	1	1
GO:0031625	ubiquitin protein ligase binding	molecular_function	1	1	1	1	1	1	1	1	1	1	1	1	1	1	1	1	1	1	1	1	1	1	1	1	1	1	1	1	1	1	1	1	1	1	1	1	1	1	1	1	1	1	1	1	1	1	1
GO:0031644	regulation of neurological system process	biological_process	1	1	1	1	1	1	1	1	1	1	1	1	1	1	1	1	1	1	1	1	1	1	1	1	1	1	1	1	1	1	1	1	1	1	1	1	1	1	1	1	1	1	1	1	1	1	1
GO:0031646	positive regulation of neurological system process	biological_process	1	1	1	1	1	1	1	1	1	1	1	1	1	1	1	1	1	1	1	1	1	1	1	1	1	1	1	1	1	1	1	1	1	1	1	1	1	1	1	1	1	1	1	1	1	1	1
GO:0031667	response to nutrient levels	biological_process	1	1	1	1	1	1	1	1	1	1	1	1	1	1	1	1	1	1	1	1	1	1	1	1	1	1	1	1	1	1	1	1	1	1	1	1	1	1	1	1	1	1	1	1	1	1	1
GO:0031668	cellular response to extracellular stimulus	biological_process	1	1	1	1	1	1	1	1	1	1	1	1	1	1	1	1	1	1	1	1	1	1	1	1	1	1	1	1	1	1	1	1	1	1	1	1	1	1	1	1	1	1	1	1	1	1	1
GO:0031672	A band	cellular_component	1	1	1	1	1	1	1	1	1	1	1	1	1	1	1	1	1	1	1	1	1	1	1	1	1	1	1	1	1	1	1	1	1	1	1	1	1	1	1	1	1	0.0025824	1.1456e-09	8.32e-07	0.00024864	1	1
GO:0031674	I band	cellular_component	1	1	1	1	1	1	1	1	1	1	1	1	1	1	1	1	1	1	1	1	1	1	1	1	1	1	1	1	1	1	1	1	1	1	1	1	1	1	1	1	1	1	1	1	1	1	1
GO:0031966	mitochondrial membrane	cellular_component	1	0.0001152	0.0012352	1	1	1	1	1	1	1	1	1	1	1	1	1	1	1	1	1	1	1	1	1	1	1	1	1	1	1	1	1	1	1	1	1	1	1	1	1	1	1	1	1	1	1	1
GO:0031967	organelle envelope	cellular_component	0.0010496	9.664e-06	0.0003424	1	1	1	1	1	1	1	1	1	1	1	1	1	1	1	1	1	1	1	1	1	1	1	1	1	1	1	1	1	1	1	0.0019968	1	1	1	1	1	1	1	1	1	1	1	1
GO:0031968	organelle outer membrane	cellular_component	1	1	1	1	1	1	1	1	1	1	1	1	1	1	1	1	1	1	1	1	1	1	1	1	1	1	1	1	1	1	1	1	1	1	1	1	1	1	1	1	1	1	1	1	1	1	1
GO:0031974	membrane-enclosed lumen	cellular_component	1	0.0009824	0.0008896	1	1	1	0.0011488	1	1	1	1	1	1	1	1	1	1	2.5088e-05	1	1	1	1	1	1	1	1	1	1	1	1	1	8.16e-06	1	1	1	1.3184e-06	1.3856e-08	7.616e-05	0.00017152	1	1	1	1	1	1	1	1
GO:0031975	envelope	cellular_component	0.0017472	7.072e-05	0.00488234	1	1	1	1	1	1	1	1	1	1	1	1	1	1	1	1	1	1	1	1	1	1	1	1	1	1	1	1	1	1	1	1	1	1	1	1	1	1	1	1	1	1	1	1
GO:0031981	nuclear lumen	cellular_component	1	0.0022944	0.0004096	1	1	1	0.00024448	1	1	1	1	1	1	1	1	1	1	2.2112e-06	1	1	1	1	1	1	1	1	1	1	1	1	1	8.128e-06	1	1	1	9.248e-08	1.1424e-09	1.3376e-05	6.592e-05	1	1	1	1	1	1	1	1
GO:0031982	vesicle	cellular_component	1	1	1	1	1	1	1	1	1	1	1	1	1	1	1	1	1	1	1	1	1	1	1	1	1	1	1	1	1	1	1	1	1	1	1	1	1	1	1	1	1	1	1	1	1	1	1
GO:0031987	locomotion involved in locomotory behavior	biological_process	1	1	1	1	1	1	1	1	1	1	1	1	1	1	1	1	1	1	1	1	1	1	1	1	1	1	1	1	1	1	1	1	1	1	1	1	1	1	1	1	1	1	1	1	1	1	1
GO:0031988	membrane-bounded vesicle	cellular_component	1	1	1	1	1	1	1	1	1	1	1	1	1	1	1	1	1	1	1	1	1	1	1	1	1	1	1	1	1	1	1	1	1	1	1	1	1	1	1	1	1	1	1	1	1	1	1
GO:0032011	ARF protein signal transduction	biological_process	1	1	1	1	1	1	1	1	1	1	1	1	1	1	1	1	1	1	1	1	1	1	1	1	1	1	1	1	1	1	1	1	1	1	1	1	1	1	1	1	1	1	1	1	1	1	1
GO:0032012	regulation of ARF protein signal transduction	biological_process	1	1	1	1	1	1	1	1	1	1	1	1	1	1	1	1	1	1	1	1	1	1	1	1	1	1	1	1	1	1	1	1	1	1	1	1	1	1	1	1	1	1	1	1	1	1	1
GO:0032094	response to food	biological_process	1	1	1	1	1	1	1	1	1	1	1	1	1	1	1	1	1	1	1	1	1	1	1	1	1	1	1	1	1	1	1	1	1	1	1	1	1	1	1	1	1	1	1	1	1	1	1
GO:0032101	regulation of response to external stimulus	biological_process	1	1	1	1	1	1	1	1	1	1	1	1	1	1	1	1	1	1	1	1	1	1	1	1	1	1	1	1	1	1	1	1	1	1	1	1	1	1	1	1	1	1	1	1	1	1	1
GO:0032147	activation of protein kinase activity	biological_process	1	1	1	1	1	1	1	1	1	1	1	1	1	1	1	1	1	1	1	1	1	1	1	1	1	1	1	1	1	1	1	1	1	1	1	1	1	1	1	1	1	1	1	1	1	1	1
GO:0032153	cell division site	cellular_component	1	1	1	1	1	1	1	1	1	1	1	1	1	1	1	1	1	1	1	1	1	1	1	1	1	1	1	1	1	1	1	1	1	1	1	1	1	0.0027648	1	1	1	1	1	1	1	1	1
GO:0032154	cleavage furrow	cellular_component	1	1	1	1	1	1	1	1	1	1	1	1	1	1	1	1	1	1	1	1	1	1	1	1	1	1	1	1	1	1	1	1	1	1	1	1	1	0.0027648	1	1	1	1	1	1	1	1	1
GO:0032155	cell division site part	cellular_component	1	1	1	1	1	1	1	1	1	1	1	1	1	1	1	1	1	1	1	1	1	1	1	1	1	1	1	1	1	1	1	1	1	1	1	1	1	0.0027648	1	1	1	1	1	1	1	1	1
GO:0032200	telomere organization	biological_process	1	1	1	1	1	1	1	1	1	1	1	1	1	1	1	1	1	1	1	1	1	1	1	1	1	1	1	1	1	1	1	1	1	1	1	1	1	1	1	1	1	1	1	1	1	1	1
GO:0032222	regulation of synaptic transmission	cholinergic	biological_process	1	1	1	1	1	1	1	1	1	1	1	1	1	1	1	1	1	1	1	1	1	1	1	1	1	1	1	1	1	1	1	1	1	1	1	1	1	1	1	1	1	1	1	1	1	1
GO:0032224	positive regulation of synaptic transmission	cholinergic	biological_process	1	1	1	1	1	1	1	1	1	1	1	1	1	1	1	1	1	1	1	1	1	1	1	1	1	1	1	1	1	1	1	1	1	1	1	1	1	1	1	1	1	1	1	1	1	1
GO:0032259	methylation	biological_process	1	1	1	1	1	1	1	1	1	1	1	1	1	1	1	1	1	1	1	1	1	1	1	1	1	1	1	1	1	1	1	1	1	1	1	1	1	1	1	1	1	1	1	1	1	1	1
GO:0032266	phosphatidylinositol-3-phosphate binding	molecular_function	1	1	1	1	1	1	1	1	1	1	1	1	1	1	1	1	1	1	1	1	1	1	1	1	1	1	1	1	1	1	1	1	1	1	1	1	1	1	1	1	1	1	1	1	1	1	1
GO:0032268	regulation of cellular protein metabolic process	biological_process	0.001232	0.00030592	1	1	1	1	1	1	1	1	1	1	1	1	1	1	1	1	1	1	1	1	1	1	1	1	1	1	1	1	1	1	0.00025024	1	1	1	1	1	1	1	1	1	1	1	1	1	1
GO:0032269	negative regulation of cellular protein metabolic process	biological_process	0.00409254	1	1	1	1	1	1	1	1	1	1	1	1	1	1	1	1	1	1	1	1	1	1	1	1	1	1	1	1	1	1	1	0.00168	1	1	1	1	1	1	1	1	1	1	1	1	1	1
GO:0032270	positive regulation of cellular protein metabolic process	biological_process	1	1	1	1	1	1	1	1	1	1	1	1	1	1	1	1	1	1	1	1	1	1	1	1	1	1	1	1	1	1	1	1	1	1	1	1	1	1	1	1	1	1	1	1	1	1	1
GO:0032271	regulation of protein polymerization	biological_process	1	1	1	1	1	1	1	1	1	1	1	1	1	1	1	1	1	1	1	1	1	1	1	1	1	1	1	1	1	1	1	1	1	1	1	1	1	1	1	1	1	1	1	1	1	1	1
GO:0032273	positive regulation of protein polymerization	biological_process	1	1	1	1	1	1	1	1	1	1	1	1	1	1	1	1	1	1	1	1	1	1	1	1	1	1	1	1	1	1	1	1	1	1	1	1	1	1	1	1	1	1	1	1	1	1	1
GO:0032324	molybdopterin cofactor biosynthetic process	biological_process	1	1	1	1	1	1	1	1	1	1	1	1	1	1	1	1	1	1	1	1	1	1	1	1	1	1	1	1	1	1	1	1	1	1	1	1	1	1	1	1	1	1	1	1	1	1	1
GO:0032403	protein complex binding	molecular_function	1	1	1	1	1	1	1	1	1	1	1	1	1	1	1	1	1	1	1	1	1	1	1	1	1	1	1	1	1	1	1	1	1	1	1	1	1	1	1	1	1	1	1	1	1	1	1
GO:0032446	protein modification by small protein conjugation	biological_process	1	0.000384	2.8576e-06	1.0688e-05	0.0070064	1	1	1	1	1	1	1	1	1	1	1	1	1	1	1	1	1	1	1	1	1	1	1	1	1	1	1	1	1	1	1	1	1	1	1	1	1	1	1	1	1	1
GO:0032456	endocytic recycling	biological_process	1	1	1	1	1	1	1	1	1	1	1	1	1	1	1	1	1	1	1	1	1	1	1	1	1	1	1	1	1	1	1	1	1	1	1	1	1	1	1	1	1	1	1	1	1	1	1
GO:0032482	Rab protein signal transduction	biological_process	1	1	1	1	1	1	1	1	1	1	1	1	1	1	1	1	1	1	1	1	1	1	1	1	1	1	1	1	1	1	1	1	1	1	1	1	1	1	1	1	1	1	1	1	1	1	1
GO:0032483	regulation of Rab protein signal transduction	biological_process	1	1	1	1	1	1	1	1	1	1	1	1	1	1	1	1	1	1	1	1	1	1	1	1	1	1	1	1	1	1	1	1	1	1	1	1	1	1	1	1	1	1	1	1	1	1	1
GO:0032501	multicellular organismal process	biological_process	9.312e-48	8.32e-87	1.8336e-47	1	1	1	4.576e-20	1.7696e-11	0.0060815	2.9408e-07	1	1	1	2.9088e-08	8.704e-09	1	1	2.3008e-11	2.1568e-12	1	1	1	1	0.00417661	1	1	1	1	1	1	1	0.00022528	7.968e-49	3.52e-11	6.336e-07	4.96e-40	6.336e-38	2.512e-19	5.952e-25	0.00404723	3.84e-05	4.864e-15	4.64e-06	1	1	1	1
GO:0032502	developmental process	biological_process	6.016e-58	7.52e-105	8.8e-57	0.00022368	1	1	1.232e-23	1.5616e-11	1	3.0656e-08	1	1	1	2.4576e-09	1.5936e-10	1	1	2.4544e-14	7.744e-15	1	0.00902755	1	1	3.264e-05	1	1	1	1	1	1	1	2.3648e-05	1.2e-57	2.5536e-14	2.4e-12	1.12e-48	1.6256e-40	1.248e-20	5.664e-31	2.1728e-07	1.1968e-07	8.864e-20	1.6896e-07	1	1	1	1
GO:0032504	multicellular organism reproduction	biological_process	1.1712e-06	2.5056e-05	0.00010976	1	1	1	0.0035255	1	1	1	1	1	1	0.00552384	0.0022496	1	1	0.0003424	0.0021952	1	1	1	1	0.008368	1	1	1	1	1	1	1	1	3.36e-09	1	1	0.0016032	1	1	1	1	1	1.4016e-08	0.002912	1	1	1	1
GO:0032506	cytokinetic process	biological_process	1	1	1	1	1	1	1	1	1	1	1	1	1	1	1	1	1	1	1	1	1	1	1	1	1	1	1	1	1	1	1	1	1	1	1	1	1	0.00998051	1	1	1	1	1	1	1	1	1
GO:0032507	maintenance of protein location in cell	biological_process	1	1	1	1	1	0.0046392	1	1	1	1	1	1	1	1	1	1	1	1	1	1	1	1	1	1	1	1	1	1	1	1	1	1	1	1	1	0.0013792	0.00010176	1	1	1	1	1	1	1	1	1	1
GO:0032535	regulation of cellular component size	biological_process	1	1	1	1	1	1	1	1	1	1	1	1	1	0.00970768	0.002288	1	1	1	1	1	1	1	1	1	1	1	1	1	1	1	1	1	1	1	1	1	1	1	1	1	1	0.00769738	1	1	1	1	1
GO:0032553	ribonucleotide binding	molecular_function	9.376e-08	1.1072e-11	2.5024e-05	1	1	1	1	1	1	1	1	1	1	1	1	1	1	1	1	1	1	1	1	1	1	1	1	1	1	1	1	1	1.7984e-13	1	1	1	1	1	3.68e-11	1	1	1	1	1	1	1	1
GO:0032555	purine ribonucleotide binding	molecular_function	9.376e-08	1.1072e-11	2.5024e-05	1	1	1	1	1	1	1	1	1	1	1	1	1	1	1	1	1	1	1	1	1	1	1	1	1	1	1	1	1	1.7984e-13	1	1	1	1	1	3.68e-11	1	1	1	1	1	1	1	1
GO:0032559	adenyl ribonucleotide binding	molecular_function	1.888e-06	2.4288e-09	0.0004256	1	1	0.00721024	1	1	1	1	1	1	1	1	1	1	1	1	1	1	1	1	1	1	1	1	1	1	1	1	1	1	2.08e-13	1	1	1	1	1	1.0944e-10	1	1	1	1	1	1	1	1
GO:0032561	guanyl ribonucleotide binding	molecular_function	1	1	1	1	1	1	1	1	1	1	1	1	1	1	1	1	1	1	1	1	1	1	1	1	1	1	1	1	1	1	1	1	1	1	1	1	1	1	1	1	1	1	1	1	1	1	1
GO:0032774	RNA biosynthetic process	biological_process	1	1	1	1	1	1	1	0.0017888	1	1	1	1	1	1	1	1	6.112e-05	3.392e-06	0.00348525	1	1.0304e-06	1	1	0.00379264	1	1	1	1	1	1	1	2.2976e-07	1	1	0.00014112	2.5792e-05	1	3.68e-05	1	1	4.032e-07	7.68e-07	1	1	1	1	1
GO:0032784	regulation of DNA-templated transcription	elongation	biological_process	1	1	1	1	1	1	1	1	1	1	1	1	1	1	1	1	1	1	1	1	1	1	1	1	1	1	1	1	1	1	1	1	1	1	1	1	1	1	1	1	1	1	1	1	1	1
GO:0032787	monocarboxylic acid metabolic process	biological_process	1	1	1	1	1	1	1	1	1	1	1	1	1	1	1	1	1	1	1	1	1	1	1	1	1	1	1	1	1	1	1	1	1	1	1	1	1	1	1	1	1	1	1	1	1	1	1
GO:0032868	response to insulin	biological_process	1	1	1	1	1	1	1	1	1	1	1	1	1	1	1	1	1	1	1	1	1	1	1	1	1	1	1	1	1	1	1	1	1	1	1	1	1	1	1	1	1	1	1	1	1	1	1
GO:0032869	cellular response to insulin stimulus	biological_process	1	1	1	1	1	1	1	1	1	1	1	1	1	1	1	1	1	1	1	1	1	1	1	1	1	1	1	1	1	1	1	1	1	1	1	1	1	1	1	1	1	1	1	1	1	1	1
GO:0032870	cellular response to hormone stimulus	biological_process	1	1	1	1	1	1	1	1	1	1	1	1	1	1	1	1	1	1	1	1	1	1	1	1	1	1	1	1	1	1	1	1	1	1	1	1	1	1	1	1	1	1	1	1	1	1	1
GO:0032879	regulation of localization	biological_process	1	1	1	1	1	1	1	1	1	1	1	1	1	1	1	1	1	1	1	1	1	1	1	1	1	1	1	1	1	1	1	1	1	1	1	1	1	1	0.00511382	1	1	4.448e-05	1	1	1	1	1
GO:0032880	regulation of protein localization	biological_process	0.0046656	0.00639562	1	1	1	1	1	1	1	1	1	1	1	1	1	1	1	1	1	1	1	1	1	1	1	1	1	1	1	1	1	1	1	1	1	1	1	1	1	1	1	1	1	1	1	1	1
GO:0032886	regulation of microtubule-based process	biological_process	1	1	1	1	1	1	1	1	1	1	1	1	1	1	1	1	1	1	1	1	1	1	1	1	1	1	1	1	1	1	1	1	1	1	1	1	1	1	1	1	1	1	1	1	1	1	1
GO:0032934	sterol binding	molecular_function	1	1	1	1	1	1	1	1	1	1	1	1	1	1	1	1	1	1	1	1	1	1	1	1	1	1	1	1	1	1	1	1	1	1	1	1	1	1	1	1	1	1	1	1	1	1	1
GO:0032940	secretion by cell	biological_process	1	1	1	1	1	1	1	1	1	1	1	1	1	1	1	1	1	1	1	1	1	1	1	1	1	1	1	1	1	1	1	1	1	1	1	1	1	1	1	1	1	1	1	1	1	1	1
GO:0032956	regulation of actin cytoskeleton organization	biological_process	1	1	1	1	1	1	1	1	1	1	1	1	1	1	1	1	1	1	1	1	1	1	1	1	1	1	1	1	1	1	1	1	1	1	1	1	1	1	1	1	1	1	1	1	1	1	1
GO:0032970	regulation of actin filament-based process	biological_process	1	1	1	1	1	1	1	1	1	1	1	1	1	1	1	1	1	1	1	1	1	1	1	1	1	1	1	1	1	1	1	1	1	1	1	1	1	1	1	1	1	1	1	1	1	1	1
GO:0032982	myosin filament	cellular_component	1	1	1	1	1	1	1	1	1	1	1	1	1	1	1	1	1	1	1	1	1	1	1	1	1	1	1	1	1	1	1	1	1	1	1	1	1	1	1	1	1	1	0.0003584	1	0.0054841	1	1
GO:0032984	macromolecular complex disassembly	biological_process	1	1	1	1	1	1	1	1	1	1	1	1	1	1	1	1	1	1	1	1	1	1	1	1	1	1	1	1	1	1	1	1	1	1	1	1	1	1	1	1	1	1	1	1	1	1	1
GO:0032989	cellular component morphogenesis	biological_process	1	1	1	1	1	1	1	1	1	1	1	1	1	0.0044872	3.456e-06	1	1	1	1	1	1	1	1	1.2256e-06	0.00583315	1	0.0068247	1	1	1	1	1	1	1	1	1	1	1	4.992e-13	0.00018304	1	4.544e-11	1.3664e-11	4.992e-16	0.00025792	1	1
GO:0032990	cell part morphogenesis	biological_process	1	1	1	1	1	1	1	1	1	1	1	1	1	1	1.088e-05	1	1	0.00798291	1	1	1	0.0025376	1	0.00870112	0.00746064	1	0.0039407	1	1	1	1	1	1	1	1	1	1	1	1.1488e-13	0.0003584	1	7.232e-08	0.0004576	4.32e-06	0.002992	1	1
GO:0032991	macromolecular complex	cellular_component	1	0.0008256	3.968e-09	1	1	1	2.1216e-07	2.1056e-08	1	1.536e-05	1	1	1	1	1	1	1	5.504e-06	1	0.00861917	1	1	1	1	1	1	1	1	1	1	1	1	1	1	0.0006144	3.232e-12	7.104e-31	2.304e-27	1	1	1.0816e-13	1	1	1	1	1	1
GO:0032993	protein-DNA complex	cellular_component	1	1	1	1	1	1	1.4016e-15	7.712e-18	1	9.44e-19	1	1	1	1	1	1	1	1.056e-12	5.792e-07	0.0013728	1	1	1	1	1	1	1	1	1	1	1	1.7984e-06	1	1	1	1.1744e-13	2.3616e-58	1.7792e-62	1	1.0432e-30	2.5728e-32	1	1	1	1	1	1
GO:0033036	macromolecule localization	biological_process	0.00708909	0.0088561	1	1	1	1	1	1	1	1	1	1	1	1	1	1	1	1	1	1	1	1	1	1	1	1	1	1	1	1	1	1	1	1	1	1	1	1	0.0024064	1	1	1	1	1	1	1	1
GO:0033043	regulation of organelle organization	biological_process	1	1	1	1	1	1	0.00474403	1	1	1	1	1	1	1	1	1	1	1	1	1	1	1	1	1	1	1	1	1	1	1	1	1	1	1	1	0.001024	1	1	1	1	1	1	1	1	1	1	1
GO:0033057	multicellular organismal reproductive behavior	biological_process	1	1	1	1	1	1	1	1	1	1	1	1	1	0.00334624	1	1	1	8.448e-07	1.136e-05	1	1	0.00669555	1	9.792e-06	1	1	1	1	1	1	1	1	1	1	1	1	1	1	0.00923363	1	1	3.024e-14	1.1456e-07	2.8096e-07	1	1	1
GO:0033058	directional locomotion	biological_process	1	1	1	1	1	1	1	1	1	1	1	1	1	1	1	1	1	1	1	1	1	1	1	1	1	1	1	1	1	1	1	1	1	1	1	1	1	1	1	1	1	1	1	0.0020224	1	1	1
GO:0033121	regulation of purine nucleotide catabolic process	biological_process	1	1	1	1	1	1	1	1	1	1	1	1	1	1	1	1	1	1	1	1	1	1	1	1	1	1	1	1	1	1	1	1	1	1	1	1	1	1	1	1	1	1	1	1	1	1	1
GO:0033124	obsolete regulation of GTP catabolic process	biological_process	1	1	1	1	1	1	1	1	1	1	1	1	1	1	1	1	1	1	1	1	1	1	1	1	1	1	1	1	1	1	1	1	1	1	1	1	1	1	1	1	1	1	1	1	1	1	1
GO:0033176	proton-transporting V-type ATPase complex	cellular_component	1	1	1	1	1	1	1	1	1	1	1	1	1	1	1	1	1	1	1	1	1	1	1	1	1	1	1	1	1	1	1	1	1	1	1	1	1	1	1	1	1	1	1	1	1	1	1
GO:0033177	proton-transporting two-sector ATPase complex	proton-transporting domain	cellular_component	1	1	1	1	1	1	1	1	1	1	1	1	1	1	1	1	1	1	1	1	1	1	1	1	1	1	1	1	1	1	1	1	1	1	1	1	1	1	1	1	1	1	1	1	1	1
GO:0033178	proton-transporting two-sector ATPase complex	catalytic domain	cellular_component	1	1	1	1	1	1	1	1	1	1	1	1	1	1	1	1	1	1	1	1	1	1	1	1	1	1	1	1	1	1	1	1	1	1	1	1	1	1	1	1	1	1	1	1	1	1
GO:0033179	proton-transporting V-type ATPase	V0 domain	cellular_component	1	1	1	1	1	1	1	1	1	1	1	1	1	1	1	1	1	1	1	1	1	1	1	1	1	1	1	1	1	1	1	1	1	1	1	1	1	1	1	1	1	1	1	1	1	1
GO:0033180	proton-transporting V-type ATPase	V1 domain	cellular_component	1	1	1	1	1	1	1	1	1	1	1	1	1	1	1	1	1	1	1	1	1	1	1	1	1	1	1	1	1	1	1	1	1	1	1	1	1	1	1	1	1	1	1	1	1	1
GO:0033206	meiotic cytokinesis	biological_process	1	1	1	1	1	1	1	1	1	1	1	1	1	1	1	1	1	1	1	1	1	1	1	1	1	1	1	1	1	1	1	1	1	1	1	1	1	0.0027648	1	1	1	1	1	1	1	1	1
GO:0033261	obsolete regulation of S phase	biological_process	1	1	1	1	1	1	1	1	1	1	1	1	1	1	1	1	1	1	1	1	1	1	1	1	1	1	1	1	1	1	1	1	1	1	1	0.00028608	1	1	1	1	1	1	1	1	1	1	1
GO:0033267	axon part	cellular_component	1	1	1	1	1	1	1	1	1	1	1	1	1	1	1	1	1	1	1	1	1	1	1	1	1	1	1	1	1	1	1	1	1	1	1	1	1	1	1	1	1	1	1	1	1	1	1
GO:0033293	monocarboxylic acid binding	molecular_function	1	1	1	1	1	1	1	1	1	1	1	1	1	1	1	1	1	1	1	1	1	1	1	1	1	1	1	1	1	1	1	1	1	1	1	1	1	1	1	1	1	1	1	1	1	1	1
GO:0033365	protein localization to organelle	biological_process	1	1	1	1	1	1	1	1	1	1	1	1	1	1	1	1	1	1	1	1	1	1	1	1	1	1	1	1	1	1	1	1	1	1	1	1	1	1	1	1	1	1	1	1	1	1	1
GO:0033554	cellular response to stress	biological_process	5.568e-07	2.176e-22	1.6416e-09	1	1	1	1	1	1	1	1	1	1	1	1	1	1	1	1	1	1	1	1	1	1	1	1	1	1	1	1	1	1.8336e-07	1	1	4.8e-05	1	1	1	1	1	1	1	1	1	1	1
GO:0033558	protein deacetylase activity	molecular_function	1	1	1	1	1	1	1	1	1	1	1	1	1	1	1	1	1	1	1	1	1	1	1	1	1	1	1	1	1	1	1	1	1	1	1	1	1	1	1	1	1	1	1	1	1	1	1
GO:0033559	unsaturated fatty acid metabolic process	biological_process	1	1	1	1	1	1	1	1	1	1	1	1	1	1	1	1	1	1	1	1	1	1	1	1	1	1	1	1	1	1	1	1	1	1	1	1	1	1	1	1	1	1	1	1	1	1	1
GO:0033563	dorsal/ventral axon guidance	biological_process	1	1	1	1	1	1	1	1	1	1	1	1	1	1	0.00450762	1	1	1	1	1	1	1	1	1	1	1	1	1	1	1	1	1	1	1	1	1	1	1	1	0.00424928	1	1	1	1	1	1	1
GO:0033674	positive regulation of kinase activity	biological_process	1	1	1	1	1	1	1	1	1	1	1	1	1	1	1	1	1	1	1	1	1	1	1	1	1	1	1	1	1	1	1	1	1	1	1	1	1	1	1	1	1	1	1	1	1	1	1
GO:0033692	cellular polysaccharide biosynthetic process	biological_process	1	1	1	1	1	1	1	1	1	1	1	1	1	1	1	1	1	1	1	1	1	1	1	1	1	1	1	1	1	1	1	1	1	1	1	1	1	1	1	1	1	1	1	1	0.00442736	1	1
GO:0033764	steroid dehydrogenase activity	acting on the CH-OH group of donors	NAD or NADP as acceptor	molecular_function	1	1	1	1	1	1	1	1	1	1	1	1	1	1	1	1	1	1	1	1	1	1	1	1	1	1	1	1	1	1	1	1	1	1	1	1	1	1	1	1	1	1	1	1	1
GO:0033865	nucleoside bisphosphate metabolic process	biological_process	1	1	1	1	1	1	1	1	1	1	1	1	1	1	1	1	1	1	1	1	1	1	1	1	1	1	1	1	1	1	1	1	1	1	1	1	1	1	1	1	1	1	1	1	1	1	1
GO:0034061	DNA polymerase activity	molecular_function	1	1	1	1	1	1	1	1	1	1	1	1	1	1	1	1	1	1	1	1	1	1	1	1	1	1	1	1	1	1	1	1	1	1	1	1	1	1	1	1	1	1	1	1	1	1	1
GO:0034062	RNA polymerase activity	molecular_function	1	1	1	1	1	1	1	1	1	1	1	1	1	1	1	1	1	1	1	1	1	1	1	1	1	1	1	1	1	1	1	1	1	1	1	1	1	1	1	1	1	1	1	1	1	1	1
GO:0034220	ion transmembrane transport	biological_process	1	1	1	1	1	1	1	1	1	1	1	1	1	1	1	1	1	1	1	1	1	1	1	1	1	1	1	1	1	1	1	1	1	1	1	1	1	1	1	1	1	1	1	1	1	1	1
GO:0034243	regulation of transcription elongation from RNA polymerase II promoter	biological_process	1	1	1	1	1	1	1	1	1	1	1	1	1	1	1	1	1	1	1	1	1	1	1	1	1	1	1	1	1	1	1	1	1	1	1	1	1	1	1	1	1	1	1	1	1	1	1
GO:0034311	diol metabolic process	biological_process	1	1	1	1	1	1	1	1	1	1	1	1	1	1	1	1	1	1	1	1	1	1	1	1	1	1	1	1	1	1	1	1	1	1	1	1	1	1	1	1	1	1	1	1	1	1	1
GO:0034330	cell junction organization	biological_process	1	1	1	1	1	1	1	1	1	1	1	1	1	1	1	1	1	1	1	1	1	1	1	1	1	1	1	1	1	1	1	1	1	1	1	1	1	1	1	1	1	0.00014016	0.00455094	0.00993696	1	1	1
GO:0034404	nucleobase-containing small molecule biosynthetic process	biological_process	1	1	1	1	1	1	1	1	1	1	1	1	1	1	1	1	1	1	1	1	1	1	1	1	1	1	0.000176	1.5584e-10	1	1	0.0001168	1	1	1	1	1	1	1	1	1	1	1	1	1	1	1	1
GO:0034440	lipid oxidation	biological_process	1	1	1	1	1	1	1	1	1	1	1	1	1	1	1	1	1	1	1	1	1	1	1	1	1	1	1	1	1	1	1	1	1	1	1	1	1	1	1	1	1	1	1	1	1	1	1
GO:0034453	microtubule anchoring	biological_process	1	1	1	1	1	0.00015776	1	1	1	1	1	1	1	1	1	1	1	1	1	1	1	1	1	1	1	1	1	1	1	1	1	1	1	1	1	0.000832	8.576e-07	0.0057943	1	1	1	1	1	1	1	1	1
GO:0034470	ncRNA processing	biological_process	1	1	1	1	1	1	1	1	0.00401242	1	1	1	1	1	1	1	1	1	1	1	1	1	1	1	1	1	1	1	1	1	1	1	1	1	1	1	1	1	1	1	1	1	1	1	1	1	1
GO:0034504	protein localization to nucleus	biological_process	0.00676931	1	1	1	1	1	1	1	1	1	1	1	1	1	1	1	1	1	1	1	1	1	1	1	1	1	1	1	1	1	1	1	0.0031776	1	1	1	1	1	1	1	1	1	1	1	1	1	1
GO:0034508	centromere complex assembly	biological_process	1	1	1	1	1	0.0043807	1	1	1	1	1	1	1	1	1	1	1	1	1	1	1	1	1	1	1	1	1	1	1	1	1	1	1	1	1	0.00028608	1.4528e-07	0.002944	1	1	1	1	1	1	1	1	1
GO:0034606	response to hermaphrodite contact	biological_process	1	1	1	1	1	1	1	1	1	1	1	1	1	1	1	1	1	1	1	1	1	1	1	1	1	1	1	1	1	1	1	1	1	1	1	1	1	1	1	1	1	1	1	1	1	1	1
GO:0034607	turning behavior involved in mating	biological_process	1	1	1	1	1	1	1	1	1	1	1	1	1	1	1	1	1	1	1	1	1	1	1	1	1	1	1	1	1	1	1	1	1	1	1	1	1	1	1	1	1	1	1	1	1	1	1
GO:0034608	vulval location	biological_process	1	1	1	1	1	1	1	1	1	1	1	1	1	1	1	1	1	1	1	1	1	1	1	1	1	1	1	1	1	1	1	1	1	1	1	1	1	1	1	1	1	1	1	1	1	1	1
GO:0034613	cellular protein localization	biological_process	0.00018112	0.0015456	1	1	1	1	1	1	1	1	1	1	1	1	1	1	1	1	1	1	1	1	1	1	1	1	1	1	1	1	1	1	1	1	1	1	1	1	1	1	1	1	1	1	1	1	1
GO:0034620	cellular response to unfolded protein	biological_process	1	1	1	1	1	1	1	1	1	1	1	1	1	1	1	1	1	1	1	1	1	1	1	1	1	1	1	1	1	1	1	1	1	1	1	1	1	1	1	1	1	1	1	1	1	1	1
GO:0034622	cellular macromolecular complex assembly	biological_process	1	1	1	1	1	1	7.872e-11	6.784e-11	1	3.36e-11	1	1	1	1	1	1	1	1.8112e-07	0.0012064	1	1	1	1	1	1	1	1	1	1	1	1	1	1	1	1	5.536e-11	5.6e-34	1.7856e-35	1	5.696e-14	3.808e-16	1	0.00620381	1	1	1	1
GO:0034637	cellular carbohydrate biosynthetic process	biological_process	1	1	1	1	1	1	1	1	1	1	1	1	1	1	1	1	1	1	1	1	1	1	1	1	1	1	1	1	1	1	1	1	1	1	1	1	1	1	1	1	1	1	1	0.0031424	1	1	1
GO:0034641	cellular nitrogen compound metabolic process	biological_process	0.00711018	5.408e-10	4.32e-17	3.008e-06	0.00810838	1	7.968e-08	1	1	1	1	1	1	1	1	1	6.336e-08	5.824e-07	1	1	0.0006816	1	1	1	1	1	1	1	1	1	1	4.96e-10	1	0.00561168	7.2e-06	2.7456e-15	8.384e-06	4.928e-05	1	1	1.408e-05	1	1	1	1	1	1
GO:0034645	cellular macromolecule biosynthetic process	biological_process	1	1	0.00990518	1	1	1	0.00572886	1	1	1	1	1	1	1	1	1	0.00019296	0.0003488	0.00926352	1	2.2272e-05	1	1	1	1	1	1	1	1	1	1	0.0004096	1	1	2.0384e-07	1.1968e-07	0.0001216	2.432e-06	1	1	8.576e-11	1	1	1	1	1	1
GO:0034654	nucleobase-containing compound biosynthetic process	biological_process	1	1	1	1	1	1	1	1	1	1	1	1	1	1	1	1	1	1	1	1	1	1	1	1	1	1	0.000176	1.5584e-10	1	1	0.0001168	1	1	1	1	1	1	1	1	1	1	1	1	1	1	1	1
GO:0034655	nucleobase-containing compound catabolic process	biological_process	1	1	1	1	1	1	1	1	1	1	1	1	1	1	1	1	1	1	1	1	1	1	1	1	1	1	1	1	1	1	1	1	1	1	1	1	1	1	1	1	1	1	1	1	1	1	1
GO:0034656	nucleobase-containing small molecule catabolic process	biological_process	1	1	1	1	1	1	1	1	1	1	1	1	1	1	1	1	1	1	1	1	1	1	1	1	1	1	1	1	1	1	1	1	1	1	1	1	1	1	1	1	1	1	1	1	1	1	1
GO:0034660	ncRNA metabolic process	biological_process	1	0.003328	1	1	1	1	1	1	0.00611203	1	1	1	1	1	1	1	1	1	1	1	1	1	1	1	1	1	1	1	1	1	1	1	1	1	1	1	1	1	1	1	1	1	1	1	1	1	1
GO:0034702	ion channel complex	cellular_component	1	1	1	1	0.0004544	1	1	1	1	1	1	1	1	1	1	1	1	1	1	1	1	1	1	1	1	1	1	1	0.0004096	1	0.00048	1	1	1	1	1	1	1	1	1	1	1	1	1	1	1	1
GO:0034703	cation channel complex	cellular_component	1	1	1	1	0.0003936	1	1	1	1	1	1	1	1	1	1	1	1	1	1	1	1	1	1	1	1	1	1	1	0.00029376	1	0.0018336	1	1	1	1	1	1	1	1	1	1	1	1	1	1	1	1
GO:0034705	potassium channel complex	cellular_component	1	1	1	1	0.00021504	1	1	1	1	1	1	1	1	1	1	1	1	1	1	1	1	1	1	1	1	1	1	1	0.00027328	1	1	1	1	1	1	1	1	1	1	1	1	1	1	1	1	1	1
GO:0034728	nucleosome organization	biological_process	1	1	1	1	1	1	1.6e-14	2.56e-16	1	7.424e-19	1	1	1	1	1	1	1	7.968e-13	4.96e-07	0.0012736	1	1	1	1	1	1	1	1	1	1	1	1.4752e-06	1	1	1	9.248e-13	7.328e-57	5.888e-61	1	3.296e-31	1.0784e-32	1	1	1	1	1	1
GO:0034762	regulation of transmembrane transport	biological_process	1	1	1	1	1	1	1	1	1	1	1	1	1	1	1	1	1	1	1	1	1	1	1	1	1	1	1	1	1	1	1	1	1	1	1	1	1	1	1	1	1	1	1	1	1	1	1
GO:0034968	histone lysine methylation	biological_process	1	1	1	1	1	1	1	1	1	1	1	1	1	1	1	1	1	1	1	1	1	1	1	1	1	1	1	1	1	1	1	1	1	1	1	1	1	1	1	1	1	1	1	1	1	1	1
GO:0034976	response to endoplasmic reticulum stress	biological_process	1	1	1	1	1	1	1	1	1	1	1	1	1	1	1	1	1	1	1	1	1	1	1	1	1	1	1	1	1	1	1	1	1	1	1	1	1	1	1	1	1	1	1	1	1	1	1
GO:0035004	phosphatidylinositol 3-kinase activity	molecular_function	1	1	1	1	1	1	1	1	1	1	1	1	1	1	1	1	1	1	1	1	1	1	1	1	1	1	1	1	1	1	1	1	1	1	1	1	1	1	1	1	1	1	1	1	1	1	1
GO:0035023	regulation of Rho protein signal transduction	biological_process	1	1	1	1	1	1	1	1	1	1	1	1	1	1	1	1	1	1	1	1	1	1	1	1	1	1	1	1	1	1	1	1	1	1	1	1	1	1	1	0.00398774	1	1	1	1	1	1	1
GO:0035046	pronuclear migration	biological_process	1	1	7.552e-06	1	1	1	1	1	1	1	1	1	1	1	1	1	1	1	1	1	1	1	1	1	1	1	1	1	1	1	1	1	1	1	1	1	1	1	1	1	1	1	1	1	1	1	1
GO:0035058	nonmotile primary cilium assembly	biological_process	1	1	1	1	1	1	1	1	1	1	1	1	1	1	1	1	1	1	1	1	1	1	1	0.0018848	3.936e-08	6.304e-05	0.00455738	1	1	1	1	1	1	1	1	1	1	1	1	1	1	1	1	2.8608e-06	1.5712e-05	1	1
GO:0035091	phosphatidylinositol binding	molecular_function	1	1	1	1	1	1	1	1	1	1	1	1	1	1	1	1	1	1	1	1	1	1	1	1	1	1	1	1	1	1	1	1	0.00136	1	1	1	1	1	1	1	1	1	1	1	1	1	1
GO:0035112	genitalia morphogenesis	biological_process	1	1	1	1	1	1	1	1	1	1	1	1	1	1	1	1	1	1	1	1	1	1	1	1	1	1	1	1	1	1	1	1	1	1	1	1	1	1	1	1	1	1	1	1	1	1	1
GO:0035121	obsolete tail morphogenesis	biological_process	1	1	1	1	1	1	1	1	1	1	1	1	1	1	1	1	1	4.064e-05	0.0006592	1	1	1	1	1	1	1	1	1	1	1	1	1	1	1	1	1	1	1	1	1	0.00461645	4.928e-07	1	1	1	1	1
GO:0035150	regulation of tube size	biological_process	1	1	1	1	1	1	1	1	1	1	1	1	1	1	1	1	1	1	1	1	1	1	1	1	1	1	1	1	1	1	1	1	1	1	1	1	1	1	1	1	1	1	1	1	1	1	1
GO:0035178	turning behavior	biological_process	1	1	1	1	1	1	1	1	1	1	1	1	1	1	1	1	1	1	1	1	1	1	1	1	1	1	1	1	1	1	1	1	1	1	1	1	1	1	1	1	1	1	1	1	1	1	1
GO:0035188	hatching	biological_process	1	0.0010272	1	1	1	1	1	1	1	1	1	1	1	1	1	1	1	1	1	1	1	1	1	1	1	1	1	1	1	1	1	1	1	1	1	1	1	1	1	1	1	1	1	1	1	1	1
GO:0035194	posttranscriptional gene silencing by RNA	biological_process	1	5.216e-07	1.4272e-05	1	1	1	1	1	1	1	1	1	1	1	1	1	1	1	1	1	1	1	1	1	1	1	1	1	1	1	1	1	0.00755539	1	1	1	1	1	1	1	1	1	1	1	1	1	1
GO:0035195	gene silencing by miRNA	biological_process	1	1	1	1	1	1	1	1	1	1	1	1	1	1	1	1	1	1	1	1	1	1	1	1	1	1	1	1	1	1	1	1	1	1	1	1	1	1	1	1	1	1	1	1	1	1	1
GO:0035262	gonad morphogenesis	biological_process	1	1	1	1	1	1	1	1	1	1	1	1	1	1	1	1	1	1	1	1	1	1	1	1	1	1	1	1	1	1	1	1	1	1	1	1	1	1	1	1	1	1	1	1	1	1	1
GO:0035264	multicellular organism growth	biological_process	6.656e-05	0.0018336	1	1	1	1	1	1	1	1	1	1	1	1	0.0010304	1	1	1	1	1	1	1	1	1	1	1	1	1	1	1	1	1	0.00032	1	1	1	1	1	0.001664	1	1	2.912e-08	2.32e-05	6.08e-05	1	1	1
GO:0035265	organ growth	biological_process	1	1	1	1	1	1	1	1	1	1	1	1	1	1	1	1	1	1	1	1	1	1	1	1	1	1	1	1	1	1	1	1	1	1	1	1	1	1	1	1	1	1	1	1	1	1	1
GO:0035282	segmentation	biological_process	1	1	1	1	1	1	1	1	1	1	1	1	1	1	1	1	1	1	1	1	1	1	1	1	1	1	1	1	1	1	1	1	1	1	1	1	1	1	1	1	1	1	1	1	1	1	1
GO:0035383	thioester metabolic process	biological_process	1	1	1	1	1	1	1	1	1	1	1	1	1	1	1	1	1	1	1	1	1	1	1	1	1	1	1	1	1	1	1	1	1	1	1	1	1	1	1	1	1	1	1	1	1	1	1
GO:0035418	protein localization to synapse	biological_process	1	1	1	1	1	1	1	1	1	1	1	1	1	1	1	1	1	1	1	1	1	1	1	1	1	1	1	1	1	1	1	1	1	1	1	1	1	1	1	1	1	1	1	1	1	1	1
GO:0035556	intracellular signal transduction	biological_process	1	1	1	1	1	1	1	1	1	1	1	1	1	1	1	1	1	0.00599728	0.0052712	1	1	1	1	1	1	1	1	1	1	1	1	1	1	1	1	1	1	1	1	1	1	1	1	0.00753606	1	1	1
GO:0035567	non-canonical Wnt signaling pathway	biological_process	1	1	1	1	1	1	1	1	1	1	1	1	1	1	1	1	1	1	1	1	1	1	1	1	1	1	1	1	1	1	1	1	1	1	1	1	1	1	1	1	1	1	1	1	1	1	1
GO:0035601	protein deacylation	biological_process	1	1	1	1	1	1	1	1	1	1	1	1	1	1	1	1	1	1	1	1	1	1	1	1	1	1	1	1	1	1	1	1	1	1	1	1	1	1	1	1	1	1	1	1	1	1	1
GO:0040001	establishment of mitotic spindle localization	biological_process	1	0.00938074	1	1	1	1	1	1	1	1	1	1	1	1	1	1	1	1	1	1	1	1	1	1	1	1	1	1	1	1	1	1	1	1	1	1	1	1	1	1	1	1	1	1	1	1	1
GO:0040002	collagen and cuticulin-based cuticle development	biological_process	1	1	1	1	1	1	1	1	1	1	1	1	1	3.0752e-06	0.002976	1	1	1	1	1	1	1	1	1	1	1	1	1	1	1	1	1	1	1	1	1	1	1	1	0.0026976	1	3.36e-05	1	1	1	1	1
GO:0040007	growth	biological_process	3.1968e-13	1.1776e-27	1.9488e-17	1	1	1	1.8304e-15	1.2672e-05	0.00987114	1.2192e-10	1	1	1	0.00021984	4.416e-05	1	1	6.912e-11	2.5312e-10	0.00564346	1	0.00367946	1	1	1	1	1	1	1	1	1	1.9296e-05	2.7232e-11	1	0.00998595	9.984e-15	9.984e-17	1.5328e-08	2.7872e-22	1	1.0464e-09	1.4016e-11	6.976e-06	1	1	1	1
GO:0040008	regulation of growth	biological_process	1.744e-09	3.392e-17	3.424e-09	1	1	1	7.008e-10	2.528e-05	1	5.984e-09	1	1	1	1	0.00010368	1	1	4.224e-11	2.8992e-08	1	1	1	1	1	1	1	1	1	1	1	1	0.0005408	1.2096e-07	1	0.00358253	3.744e-07	3.36e-10	8.416e-07	7.808e-17	1	1.2512e-07	2.0608e-06	9.024e-05	1	1	1	1
GO:0040009	regulation of growth rate	biological_process	7.584e-07	3.712e-16	1.0624e-08	1	1	1	1.824e-10	0.00019872	1	3.232e-07	1	1	1	1	1	1	1	1.7312e-11	5.504e-07	0.0020576	1	1	1	1	1	1	1	1	1	1	1	3.296e-05	2.1248e-05	1	0.0021248	2.2592e-07	3.616e-10	1.2608e-06	1.7248e-16	1	1.4688e-07	0.0003424	0.00826387	1	1	1	1
GO:0040010	positive regulation of growth rate	biological_process	1.1488e-06	6.016e-16	1.6832e-08	1	1	1	1.7664e-10	0.00019648	1	3.1808e-07	1	1	1	1	1	1	1	1.6608e-11	5.376e-07	0.002032	1	1	1	1	1	1	1	1	1	1	1	3.1968e-05	3.1872e-05	1	0.0020736	2.1888e-07	3.52e-10	1.232e-06	1.6352e-16	1	1.3952e-07	0.0003328	0.00809952	1	1	1	1
GO:0040011	locomotion	biological_process	1	0.00015424	3.0528e-06	1	1	1	7.168e-10	1	1	5.344e-06	1	1	0.0016288	1.1936e-11	2.6304e-13	1	1	5.728e-14	9.952e-21	0.00026656	1	0.0011264	1	3.1744e-07	1	1	1	1	1	1	1	0.00328272	1	1	1	6.624e-13	6.144e-16	6.784e-11	1.9264e-23	8.16e-07	1.584e-07	5.344e-35	3.392e-17	7.84e-13	1	1	1
GO:0040012	regulation of locomotion	biological_process	1	1	1	1	1	1	1	1	1	1	1	1	1	1	1	1	1	1	0.0008	1	1	0.00409446	1	1	1	1	1	1	1	1	1	1	1	1	1	1	1	1	0.00529584	1	1	2.5184e-07	0.00473475	0.0001776	1	1	1
GO:0040013	negative regulation of locomotion	biological_process	1	1	1	1	1	1	1	1	1	1	1	1	1	1	1	1	1	1	1	1	1	1	1	1	1	1	1	1	1	1	1	1	1	1	1	1	1	1	1	1	1	1	1	1	1	1	1
GO:0040014	regulation of multicellular organism growth	biological_process	0.00022656	0.00571782	1	1	1	1	1	1	1	1	1	1	1	1	0.0006912	1	1	1	1	1	1	1	1	1	1	1	1	1	1	1	1	1	0.002416	1	1	1	1	1	0.0009312	1	1	4e-08	3.2e-05	0.0001888	1	1	1
GO:0040015	negative regulation of multicellular organism growth	biological_process	0.00651232	1	1	1	1	1	1	1	1	1	1	1	1	1	1	1	1	1	1	1	1	1	1	1	1	1	1	1	1	1	1	1	1	1	1	1	1	1	1	1	1	1	1	1	1	1	1
GO:0040017	positive regulation of locomotion	biological_process	1	1	1	1	1	1	1	1	1	1	1	1	1	1	1	1	1	1	1	1	1	1	1	1	1	1	1	1	1	1	1	1	1	1	1	1	1	1	1	1	1	0.00018464	1	1	1	1	1
GO:0040018	positive regulation of multicellular organism growth	biological_process	1	1	1	1	1	1	1	1	1	1	1	1	1	1	0.000784	1	1	1	1	1	1	1	1	1	1	1	1	1	1	1	1	1	0.00615053	1	1	1	1	1	0.00606243	1	1	2.8992e-09	1.8432e-05	3.712e-05	1	1	1
GO:0040019	positive regulation of embryonic development	biological_process	1	1	1	1	1	1	1	1	1	1	1	1	1	1	1	1	1	1	1	1	1	1	1	1	1	1	1	1	1	1	1	1	1	1	1	1	1	1	1	1	1	1	1	1	1	1	1
GO:0040020	regulation of meiotic nuclear division	biological_process	1	1	1	1	1	1	1	1	1	1	1	1	1	1	1	1	1	1	1	1	1	1	1	1	1	1	1	1	1	1	1	1	1	1	1	1	1	1	1	1	1	1	1	1	1	1	1
GO:0040021	hermaphrodite germ-line sex determination	biological_process	1	1	1	1	1	1	1	1	1	1	1	1	1	1	1	1	1	1	1	1	1	1	1	1	1	1	1	1	1	1	1	1	1	1	1	1	1	1	1	1	1	1	1	1	1	1	1
GO:0040022	feminization of hermaphroditic germ-line	biological_process	1	1	1	1	1	1	1	1	1	1	1	1	1	1	1	1	1	1	1	1	1	1	1	1	1	1	1	1	1	1	1	1	1	1	1	1	1	1	1	1	1	1	1	1	1	1	1
GO:0040023	establishment of nucleus localization	biological_process	1	1	3.776e-05	1	1	1	1	1	1	1	1	1	1	1	1	1	1	1	1	1	1	1	1	1	1	1	1	1	1	1	1	1	1	1	1	1	1	1	1	1	1	1	1	1	1	1	1
GO:0040024	dauer larval development	biological_process	1	1	1	1	1	1	1	1	1	1	1	1	1	1	1	1	1	1	1	1	1	1	1	1	1	1	1	1	1	1	1	1	0.00739117	1	1	1	1	1	1	1	1	1	1	1	1	1	1
GO:0040025	vulval development	biological_process	9.696e-06	8.672e-08	0.0030464	1	1	1	0.0009184	1	1	1	1	1	1	1	1	1	1	6.976e-05	1	1	1	1	1	1	1	1	1	1	1	1	1	1	0.0008192	1	1	1.2096e-05	1	1	1.008e-05	1	1	1	1	1	1	1	1
GO:0040026	positive regulation of vulval development	biological_process	1	1	1	1	1	1	1	1	1	1	1	1	1	1	1	1	1	1	1	1	1	0.0024864	1	1	1	1	1	1	1	1	1	1	1	1	1	1	1	1	1	1	1	1	1	1	1	1	1
GO:0040027	negative regulation of vulval development	biological_process	0.0019456	9.216e-06	0.00490058	1	1	1	5.248e-05	1	1	1	1	1	1	1	1	1	1	1	1	1	1	1	1	1	1	1	1	1	1	1	1	1	1	1	1	5.184e-06	1	0.0015456	0.0001552	1	1	1	1	1	1	1	1
GO:0040028	regulation of vulval development	biological_process	0.0010432	2.9184e-05	1	1	1	1	1.328e-05	1	1	1	1	1	1	1	1	1	1	0.0080312	1	1	1	1	1	1	1	1	1	1	1	1	1	1	1	1	1	5.472e-06	1	0.0011136	1.7088e-06	1	1	1	1	1	1	1	1
GO:0040029	regulation of gene expression	epigenetic	biological_process	1	5.664e-06	2.5248e-05	1	1	1	1	1	1	1	1	1	1	1	1	1	1	1	1	1	1	1	1	1	1	1	1	1	1	1	1	1	1	1	1	1	1	1	9.248e-05	1	1	1	1	1	1	1
GO:0040032	post-embryonic body morphogenesis	biological_process	1	1	1	1	1	1	1	1	1	1	1	1	1	1	1	1	1	1	1	1	1	1	1	1	1	1	1	1	1	1	1	1	1	1	1	1	1	1	1	1	1	1	1	1	1	1	1
GO:0040034	regulation of development	heterochronic	biological_process	1	1	1	1	1	1	1	1	1	1	1	1	1	1	1	1	1	1	1	1	1	1	1	1	1	1	1	1	1	1	1	1	1	1	1	1	1	1	1	1	1	1	1	1	1	1
GO:0040035	hermaphrodite genitalia development	biological_process	1	7.616e-09	6.4e-12	0.00029536	1	1.664e-06	5.888e-14	0.00535747	1	1	1	1	1	1	1	1	0.0003584	0.00020416	1	1	1	1	1	1	1	1	1	1	1	1	1	0.00860749	1	1	0.0022624	2.592e-27	3.296e-28	1.1744e-16	1.7056e-10	1	1	1	1	1	1	1	1
GO:0040038	polar body extrusion after meiotic divisions	biological_process	1	1	1	1	1	1	1	1	1	1	1	1	1	1	1	1	1	1	1	1	1	1	1	1	1	1	1	1	1	1	1	1	1	1	1	1	1	0.0018752	1	1	1	1	1	1	1	1	1
GO:0040039	inductive cell migration	biological_process	1	1	0.0011744	1	1	1	1	1	0.00842755	1	1	1	1	1	1	1	1	1	0.00544694	1	1	1	1	1	1	1	1	1	1	1	1	1	1	1	1	1	1	1	3.84e-06	1	1	0.00861389	1	1	1	1	1
GO:0040040	thermosensory behavior	biological_process	1	1	1	1	1	1	1	1	1	1	1	1	1	1	1	1	1	1	1	1	1	1	1	1	1	1	1	0.0007456	1	1	1	1	1	1	1	1	1	1	1	1	1	1	1	1	1	1	1
GO:0042006	masculinization of hermaphroditic germ-line	biological_process	0.00758813	0.0010816	1	1	1	1	1	1	1	1	1	1	1	1	1	1	1	1	1	1	1	1	1	1	1	1	1	1	1	1	1	1	0.00020928	0.00561168	1	1	1	1	1	1	1	1	1	1	1	1	1
GO:0042026	protein refolding	biological_process	1	4.32e-06	1	1	1	1	1	1	1	1	1	1	1	1	1	1	1	1	1	1	1	1	1	1	1	1	1	1	1	1	1	1	1	1	1	1	1	1	1	1	1	1	1	1	1	1	1
GO:0042044	fluid transport	biological_process	1	1	1	1	1	1	1	1	1	1	1	1	1	1	1	1	1	1	1	1	1	1	1	1	1	1	1	1	1	1	1	1	1	1	1	1	1	1	1	1	1	1	1	1	1	1	1
GO:0042048	olfactory behavior	biological_process	1	1	1	1	1	1	1	1	1	1	1	1	1	1	1	1	1	1	1	1	1	1	1	1	1	1	1	1	1	1	1	1	1	1	1	1	1	1	1	1	1	1	1	1	1	1	1
GO:0042054	histone methyltransferase activity	molecular_function	1	1	1	1	1	1	1	1	1	1	1	1	1	1	1	1	1	1	1	1	1	1	1	1	1	1	1	1	1	1	1	1	1	1	1	1	1	1	1	1	1	1	1	1	1	1	1
GO:0042073	intraciliary transport	biological_process	1	1	1	1	1	1	1	1	1	1	1	1	1	1	1	1	1	1	1	1	1	1	1	1	0.0002656	0.0002944	1	1	1	1	1	1	1	1	1	1	1	1	1	1	1	1	1	1	9.088e-05	1	1
GO:0042074	cell migration involved in gastrulation	biological_process	1	1	1	1	1	1	1	1	1	1	1	1	1	1	1	1	1	1	3.84e-05	1	1	1	1	1	1	1	1	1	1	1	1	1	1	1	1	1	1	1	1	8.32e-06	1	1.5264e-06	1	1	1	1	1
GO:0042078	germ-line stem cell division	biological_process	1	1	1	1	1	1	1	1	1	1	1	1	1	1	1	1	1	1	1	1	1	1	1	1	1	1	1	1	1	1	1	1	0.00671296	1	1	1	1	1	1	1	1	1	1	1	1	1	1
GO:0042127	regulation of cell proliferation	biological_process	1	1	1	1	0.00529075	1	1	1	1	1	1	1	1	1	1	1	1	1	1	1	1	1	1	1	1	1	1	1	1	1	1	1	1	1	1	1	1	1	1	1	1	1	1	1	1	1	1
GO:0042133	neurotransmitter metabolic process	biological_process	1	1	1	1	1	1	1	1	1	1	1	1	1	1	1	1	1	1	1	1	1	1	1	1	1	1	1	1	1	1	1	1	1	1	1	1	1	1	1	1	1	1	1	1	1	1	1
GO:0042157	lipoprotein metabolic process	biological_process	1	1	1	1	1	1	1	1	1	1	1	1	1	1	1	1	1	1	1	1	1	1	1	1	1	1	1	1	1	1	1	1	1	1	1	1	1	1	1	1	1	1	1	1	1	1	1
GO:0042158	lipoprotein biosynthetic process	biological_process	1	1	1	1	1	1	1	1	1	1	1	1	1	1	1	1	1	1	1	1	1	1	1	1	1	1	1	1	1	1	1	1	1	1	1	1	1	1	1	1	1	1	1	1	1	1	1
GO:0042165	neurotransmitter binding	molecular_function	1	1	1	1	1	1	1	1	1	1	1	1	1	1	1	1	1	1	1	1	1	1	1	1	1	1	1	9.6e-06	1.28e-09	1.6576e-06	1	1	1	1	1	1	1	1	1	1	1	1	1	1	1	0.00340064	1
GO:0042166	acetylcholine binding	molecular_function	1	1	1	1	1	1	1	1	1	1	1	1	1	1	1	1	1	1	1	1	1	1	1	1	1	1	1	0.0010112	1	1	1	1	1	1	1	1	1	1	1	1	1	1	1	1	1	1	1
GO:0042175	nuclear outer membrane-endoplasmic reticulum membrane network	cellular_component	1	0.0006816	1	1	1	1	1	1	1	1	1	1	1	1	1	1	1	1	1	1	1	1	1	1	1	1	1	1	1	1	1	1	1	1	1	1	1	1	1	1	1	1	1	1	1	1	1
GO:0042176	regulation of protein catabolic process	biological_process	1	1	1	1	1	1	1	1	1	1	1	1	1	1	1	1	1	1	1	1	1	1	1	1	1	1	1	1	1	1	1	1	1	1	1	1	1	1	1	1	1	1	1	1	1	1	1
GO:0042180	cellular ketone metabolic process	biological_process	1	0.00335472	1	1	1	1	1	1	1	1	1	1	1	1	1	1	1	1	1	1	1	1	1	1	1	1	1	1	1	1	1	1	0.00486842	1	1	1	1	1	1	1	0.0013312	1	1	1	1	1	1
GO:0042221	response to chemical	biological_process	1	1	1	1	1	1	1	1	1	1	1	1	1	1	0.0012224	1	1	1	1	1	1	1	1	1	1	1	1	0.00024096	1	1	1	1	1	1	1	1	1	1	1	1	1	0.0029728	1	2.6752e-05	1	1	1
GO:0042254	ribosome biogenesis	biological_process	1	1	1	1	1	1	1	1	1	1	1	1	1	1	1	1	1	1	1	1	1	1	1	1	1	1	1	1	1	1	1	1	1	1	1	1	1	1	1	1	1	1	1	1	1	1	1
GO:0042277	peptide binding	molecular_function	1	1	1	1	1	1	1	1	1	1	1	1	1	1	1	1	1	1	1	1	1	1	1	1	1	1	1	1	3.616e-05	4.448e-05	1	1	1	1	1	1	1	1	1	1	1	1	1	1	1	1	1
GO:0042278	purine nucleoside metabolic process	biological_process	1	1	1	1	1	1	1	1	1	1	1	1	1	1	1	1	1	1	1	1	1	1	1	1	1	1	1	1	1	1	1	1	1	1	1	1	1	1	1	1	1	1	1	1	1	1	1
GO:0042302	structural constituent of cuticle	molecular_function	1	1	1	1	1	1	1	1	1	1	1	1	1	1	1	1	1	1	1	1	1	1	1	1	1	1	1	1	0.0024992	1.376e-06	1	1	1	1	3.392e-11	1	0.0011552	1	1	1.744e-21	1	1.0048e-11	1	1	1	1.8848e-07	1.0848e-48
GO:0042303	molting cycle	biological_process	1	1	1	1	1	1	1	1	1	1	1	1	1	5.728e-06	9.856e-07	1	1	1	1	1	1	1	1	1	1	1	0.00754173	1	1	1	1	1	1	1	1	1	1	1	3.456e-08	1	1	2.8928e-08	0.000528	6.528e-06	0.00616976	1	1
GO:0042325	regulation of phosphorylation	biological_process	1	1	1	1	1	1	1	1	1	1	1	1	1	1	1	1	1	1	1	1	0.0093169	1	1	1	1	1	1	1	1	1	1	1	1	1	1	1	1	1	1	1	1	1	1	1	1	1	1
GO:0042329	structural constituent of collagen and cuticulin-based cuticle	molecular_function	1	1	1	1	1	1	1	1	1	1	1	1	1	1	1	1	1	1	1	1	1	1	1	1	1	1	1	1	1	1	1	1	1	1	1	1	1	1	1	1	1	1	1	1	1	1	1
GO:0042330	taxis	biological_process	1	1	1	1	1	1	1	1	1	1	1	1	1	1	8.32e-06	1	1	1	1	1	1	1	1	1	1	1	1	1	1	1	1	1	1	1	1	1	1	1	0.00021664	1	1	0.00014688	1	0.00021792	1	1	1
GO:0042335	cuticle development	biological_process	1	1	1	1	1	1	1	1	1	1	1	1	1	4.096e-06	0.00375965	1	1	1	1	1	1	1	1	1	1	1	1	1	1	1	1	1	1	1	1	1	1	1	1	0.0050256	1	5.12e-05	1	1	1	1	1
GO:0042336	obsolete cuticle development involved in protein-based cuticle molting cycle	biological_process	1	1	1	1	1	1	1	1	1	1	1	1	1	1	1	1	1	1	1	1	1	1	1	1	1	1	1	1	1	1	1	1	1	1	1	1	1	1	1	1	1	1	1	1	1	1	1
GO:0042338	cuticle development involved in collagen and cuticulin-based cuticle molting cycle	biological_process	1	1	1	1	1	1	1	1	1	1	1	1	1	1	1	1	1	1	1	1	1	1	1	1	1	1	1	1	1	1	1	1	1	1	1	1	1	1	1	1	1	1	1	1	1	1	1
GO:0042364	water-soluble vitamin biosynthetic process	biological_process	1	1	1	1	1	1	1	1	1	1	1	1	1	1	1	1	1	1	1	1	1	1	1	1	1	1	1	1	1	1	1	1	1	1	1	1	1	1	1	1	1	1	1	1	1	1	1
GO:0042384	cilium assembly	biological_process	1	1	1	1	1	1	1	1	1	1	1	1	1	1	1	1	1	1	1	1	1	1	1	0.0005696	1.0368e-10	6.752e-05	0.000976	1	1	1	1	1	1	1	1	1	1	1	0.00024928	1	1	1	1	6.848e-09	1.792e-08	1	1
GO:0042391	regulation of membrane potential	biological_process	1	1	1	1	1	1	1	1	1	1	1	1	1	1	1	1	1	1	1	1	1	1	1	1	1	1	1	1	1	1	1	1	1	1	1	1	1	1	1	1	1	1	1	1	1	1	1
GO:0042394	obsolete ecdysis	protein-based cuticle	biological_process	1	1	1	1	1	1	1	1	1	1	1	1	1	1	1	1	1	1	1	1	1	1	1	1	1	1	1	1	1	1	1	1	1	1	1	1	1	1	1	1	1	1	1	1	1	1
GO:0042395	ecdysis	collagen and cuticulin-based cuticle	biological_process	1	1	1	1	1	1	1	1	1	1	1	1	1	1	1	1	1	1	1	1	1	1	1	1	1	1	1	1	1	1	1	1	1	1	1	1	1	1	1	1	1	1	1	1	1	1
GO:0042401	cellular biogenic amine biosynthetic process	biological_process	1	1	1	1	1	1	1	1	1	1	1	1	1	1	1	1	1	1	1	1	1	1	1	1	1	1	1	1	1	1	1	1	1	1	1	1	1	1	1	1	1	1	1	1	1	1	1
GO:0042402	cellular biogenic amine catabolic process	biological_process	1	1	1	1	1	1	1	1	1	1	1	1	1	1	1	1	1	1	1	1	1	1	1	1	1	1	0.0017504	1	1	1	1	1	1	1	1	1	1	1	1	1	1	1	1	1	1	1	1
GO:0042430	indole-containing compound metabolic process	biological_process	1	1	1	1	1	1	1	1	1	1	1	1	1	1	1	1	1	1	1	1	1	1	1	1	1	1	1	1	1	1	1	1	1	1	1	1	1	1	1	1	1	1	1	1	1	1	1
GO:0042439	ethanolamine-containing compound metabolic process	biological_process	1	1	1	1	1	1	1	1	1	1	1	1	1	1	1	1	1	1	1	1	1	1	1	1	1	1	1	1	1	1	1	1	1	1	1	1	1	1	1	1	1	1	1	1	1	1	1
GO:0042440	pigment metabolic process	biological_process	1	1	1	1	1	1	1	1	1	1	1	1	1	1	1	1	1	1	1	1	1	1	1	1	1	1	1	1	1	1	1	1	1	1	1	1	1	1	1	1	1	1	1	1	1	1	1
GO:0042464	dosage compensation by hypoactivation of X chromosome	biological_process	1	1	1	1	1	1	1	1	1	1	1	1	1	1	1	1	1	1	1	1	1	1	1	1	1	1	1	1	1	1	1	9.568e-05	1	1	1	1	1	1	1	1	1	1	1	1	1	1	1
GO:0042493	response to drug	biological_process	1	1	1	1	1	1	1	1	1	1	1	1	1	1	1	1	1	1	1	1	1	1	1	1	1	1	1	1	1	1	1	1	1	1	1	1	1	1	1	1	1	1	1	1	1	1	1
GO:0042537	benzene-containing compound metabolic process	biological_process	1	1	1	1	1	1	1	1	1	1	1	1	1	1	1	1	1	1	1	1	1	1	1	1	1	1	1	1	1	1	1	1	1	1	1	1	1	1	1	1	1	1	1	1	1	1	1
GO:0042546	cell wall biogenesis	biological_process	1	1	1	1	1	1	1	1	1	1	1	1	1	1	1	1	1	1	1	1	1	1	1	1	1	1	1	1	1	1	1	1	1	1	1	1	1	1	1	1	1	1	1	1	1	1	1
GO:0042558	pteridine-containing compound metabolic process	biological_process	1	1	1	1	1	1	1	1	1	1	1	1	1	1	1	1	1	1	1	1	1	1	1	1	1	1	1	1	1	1	1	1	1	1	1	1	1	1	1	1	1	1	1	1	1	1	1
GO:0042559	pteridine-containing compound biosynthetic process	biological_process	1	1	1	1	1	1	1	1	1	1	1	1	1	1	1	1	1	1	1	1	1	1	1	1	1	1	1	1	1	1	1	1	1	1	1	1	1	1	1	1	1	1	1	1	1	1	1
GO:0042578	phosphoric ester hydrolase activity	molecular_function	1	1	1	1	1	1	1	1	1	1	1	1	1	1	1	1	1	1	1	1	1	1	1	1	1	1	1	1	1	1	1	1	1	1	1	1	1	1	1	1	1	1	1	1	1	1	1
GO:0042579	microbody	cellular_component	1	1	1	1	1	1	1	1	1	1	1	1	1	1	1	1	1	1	1	1	1	1	1	1	1	1	1	1	1	1	1	0.00833594	1	1	1	1	1	1	1	1	0.0005248	1	1	1	1	1	1
GO:0042592	homeostatic process	biological_process	1	1	1	1	1	1	1	1	1	1	1	1	1	1	1	1	1	1	1	1	1	4.256e-05	1	1	1	1	1	1	1	1	1	1	1	1	1	1	1	1	1	1	1	1	1	1	1	1	1
GO:0042594	response to starvation	biological_process	1	1	1	1	1	1	1	1	1	1	1	1	1	1	1	1	1	1	1	1	1	1	1	1	1	1	1	1	1	1	1	1	1	1	1	1	1	1	1	1	1	1	1	1	1	1	1
GO:0042597	periplasmic space	cellular_component	1	1	1	1	1	1	1	1	1	1	1	1	1	1	1	1	1	1	1	1	1	1	1	1	1	1	1	1.2608e-05	1	1	1	1	1	1	1	1	1	1	1	1	1	1	1	1	1	1	1
GO:0042623	ATPase activity	coupled	molecular_function	1	0.0001472	2.9568e-07	1	1	1	1	1	1	1	1	1	1	1	1	1	1	1	1	1	1	1	1	1	1	1	1	1	1	1	1	1	0.0033849	1	1	1	1	1	0.0025824	1	1	1	1	1	1	1
GO:0042625	ATPase activity	coupled to transmembrane movement of ions	molecular_function	1	1	1	1	1	1	1	1	1	1	1	1	1	1	1	1	1	1	1	1	1	1	1	1	1	1	1	1	1	1	0.00014304	1	0.0033033	1	1	1	1	1	1	1	1	1	1	1	1	1
GO:0042626	ATPase activity	coupled to transmembrane movement of substances	molecular_function	1	1	1	1	1	1	1	1	1	1	1	1	1	1	1	1	1	1	1	1	1	1	1	1	1	1	1	1	1	1	0.00672074	1	0.00864995	1	1	1	1	1	1	1	1	1	1	1	1	1
GO:0042659	regulation of cell fate specification	biological_process	1	1	1	1	1	1	1	1	1	1	1	1	1	1	1	1	1	1	1	1	1	1	1	1	1	1	1	1	1	1	1	1	1	1	1	1	1	1	1	1	1	0.0025824	1	1	1	1	1
GO:0042692	muscle cell differentiation	biological_process	1	1	1	1	1	1	1	1	1	1	1	1	1	1	1	1	1	1	1	1	1	1	1	0.0013824	1	1	1	1	1	1	1	1	1	1	1	1	1	1	1	1	1	6.784e-05	2.6208e-10	8.96e-10	1	1	1
GO:0042693	muscle cell fate commitment	biological_process	1	1	1	1	1	1	1	1	1	1	1	1	1	1	1	1	1	1	1	1	1	1	1	1	1	1	1	1	1	1	1	1	1	1	1	1	1	1	1	1	1	1	1	1	1	1	1
GO:0042694	muscle cell fate specification	biological_process	1	1	1	1	1	1	1	1	1	1	1	1	1	1	1	1	1	1	1	1	1	1	1	1	1	1	1	1	1	1	1	1	1	1	1	1	1	1	1	1	1	1	1	1	1	1	1
GO:0042742	defense response to bacterium	biological_process	1	1	1	1	1	1	1	1	1	1	1	1	1	1	1	1	1	1	1	1	1	1	1	1	1	1	1	1	1	1	1	1	1	1	1	1	1	1	1	1	1	1	1	1	1	1	1
GO:0042755	eating behavior	biological_process	1	1	1	1	1	1	1	1	1	1	1	1	1	1	1	1	1	1	1	1	1	1	1	1	1	1	1	0.00719926	1	1	1	1	1	1	1	1	1	1	1	1	1	1	1	6.176e-05	0.00335488	0.0003808	1
GO:0042770	signal transduction in response to DNA damage	biological_process	1	1	1	1	1	1	1	1	1	1	1	1	1	1	1	1	1	1	1	1	1	1	1	1	1	1	1	1	1	1	1	1	1	1	1	1	1	1	1	1	1	1	1	1	1	1	1
GO:0042771	intrinsic apoptotic signaling pathway in response to DNA damage by p53 class mediator	biological_process	1	1	1	1	1	1	1	1	1	1	1	1	1	1	1	1	1	1	1	1	1	1	1	1	1	1	1	1	1	1	1	1	1	1	1	1	1	1	1	1	1	1	1	1	1	1	1
GO:0042773	ATP synthesis coupled electron transport	biological_process	1	1	1	1	1	1	1	1	1	1	1	1	1	1	1	1	1	1	1	1	1	1	1	1	1	1	1	1	1	1	1	1	1	1	1	1	1	1	1	1	0.001408	1	1	1	1	1	1
GO:0042775	mitochondrial ATP synthesis coupled electron transport	biological_process	1	1	1	1	1	1	1	1	1	1	1	1	1	1	1	1	1	1	1	1	1	1	1	1	1	1	1	1	1	1	1	1	1	1	1	1	1	1	1	1	0.0005248	1	1	1	1	1	1
GO:0042802	identical protein binding	molecular_function	1	1	1	1	1	1	1	1	1	1	1	1	1	1	1	1	1	1	1	1	1	1	1	1	1	1	1	1	1	1	1	1	1	1	1	1	1	1	1	1	0.00345882	1	1	1	1	1	1
GO:0042803	protein homodimerization activity	molecular_function	1	1	1	1	1	1	1	1	1	1	1	1	1	1	1	1	1	1	1	1	1	1	1	1	1	1	1	1	1	1	1	1	1	1	1	1	1	1	1	1	1	1	1	1	1	1	1
GO:0042923	neuropeptide binding	molecular_function	1	1	1	1	1	1	1	1	1	1	1	1	1	1	1	1	1	1	1	1	1	1	1	1	1	1	1	1	7.2e-08	1.6832e-06	1	1	1	1	1	1	1	1	1	1	1	1	1	1	1	1	1
GO:0042981	regulation of apoptotic process	biological_process	1	1	1	1	1	1	1	1	1	1	1	1	1	1	1	1	1	1	1	1	1	1	1	1	1	1	1	1	1	1	1	1	1	1	1	1	1	1	1	1	1	1	1	1	1	1	1
GO:0042995	cell projection	cellular_component	1	1	1	1	1	1	1	1	1	1	1	1	1	1	0.000304	1	1	1	1	1	1	1	1	1	0.0005952	1	2.0384e-05	8.544e-05	1	1	1	1	1	1	1	1	1	1	1	1	1	1	1	1.0272e-08	1.2608e-07	0.0017184	1
GO:0043005	neuron projection	cellular_component	1	1	1	1	1	1	1	1	1	1	1	1	1	1	1	1	1	1	1	1	1	1	1	1	1	1	8.864e-06	3.264e-05	1	1	1	1	1	1	1	1	1	1	1	1	1	0.00552973	1	1.9584e-06	7.264e-06	0.00010944	1
GO:0043021	ribonucleoprotein complex binding	molecular_function	1	1	1	1	1	1	1	1	1	1	1	1	1	1	1	1	1	1	1	1	1	1	1	1	1	1	1	1	1	1	1	1	1	1	1	1	1	1	1	1	1	1	1	1	1	1	1
GO:0043025	neuronal cell body	cellular_component	1	1	1	1	1	1	1	1	1	1	1	1	1	1	1	1	1	1	1	1	1	1	1	1	1	1	1	1	1	1	1	1	1	1	1	1	1	1	1	1	1	1	1	1	1	1	1
GO:0043038	amino acid activation	biological_process	1	1	1	1	1	1	1	1	1	1	1	1	1	1	1	1	1	1	1	1	1	1	1	1	1	1	1	1	1	1	1	1	1	1	1	1	1	1	1	1	1	1	1	1	1	1	1
GO:0043039	tRNA aminoacylation	biological_process	1	1	1	1	1	1	1	1	1	1	1	1	1	1	1	1	1	1	1	1	1	1	1	1	1	1	1	1	1	1	1	1	1	1	1	1	1	1	1	1	1	1	1	1	1	1	1
GO:0043043	peptide biosynthetic process	biological_process	1	1	1	1	1	1	1	1	1	1	1	1	1	1	1	1	1	1	1	1	1	1	1	1	1	1	1	1	1	1	1	1	1	1	1	1	1	1	1	1	1	1	1	1	1	1	1
GO:0043050	pharyngeal pumping	biological_process	1	1	1	1	1	1	1	1	1	1	1	1	1	1	1	1	1	1	1	1	1	1	1	1	1	1	1	0.00580499	1	1	1	1	1	1	1	1	1	1	1	1	1	1	1	4.512e-05	0.002688	0.00029024	1
GO:0043051	regulation of pharyngeal pumping	biological_process	1	1	1	1	1	1	1	1	1	1	1	1	1	1	1	1	1	1	1	1	1	1	1	1	1	1	1	1	1	1	0.0022752	1	1	1	1	1	1	1	1	1	1	1	1	3.264e-05	1	0.00340064	1
GO:0043052	thermotaxis	biological_process	1	1	1	1	1	1	1	1	1	1	1	1	1	1	1	1	1	1	1	1	1	1	1	1	1	1	1	1	1	1	1	1	1	1	1	1	1	1	1	1	1	1	1	1	1	1	1
GO:0043053	dauer entry	biological_process	1	1	1	1	1	1	1	1	1	1	1	1	1	1	1	1	1	1	1	1	1	1	1	1	1	1	1	1	1	1	1	1	0.00010816	1	1	1	1	1	1	1	1	1	1	1	1	1	1
GO:0043054	dauer exit	biological_process	1	1	1	1	1	1	1	1	1	1	1	1	1	1	1	1	1	1	1	1	1	1	1	1	1	1	1	1	1	1	1	1	1	1	1	1	1	1	1	1	1	1	1	1	1	1	1
GO:0043056	forward locomotion	biological_process	1	1	1	1	1	1	1	1	1	1	1	1	1	1	1	1	1	1	1	1	1	1	1	1	1	1	1	1	1	1	1	1	1	1	1	1	1	1	1	1	1	1	1	1	1	1	1
GO:0043057	backward locomotion	biological_process	1	1	1	1	1	1	1	1	1	1	1	1	1	1	1	1	1	1	1	1	1	1	1	1	1	1	1	1	1	1	1	1	1	1	1	1	1	1	1	1	1	1	1	0.0031712	1	1	1
GO:0043058	regulation of backward locomotion	biological_process	1	1	1	1	1	1	1	1	1	1	1	1	1	1	1	1	1	1	1	1	1	1	1	1	1	1	1	1	1	1	1	1	1	1	1	1	1	1	1	1	1	1	1	1	1	1	1
GO:0043059	regulation of forward locomotion	biological_process	1	1	1	1	1	1	1	1	1	1	1	1	1	1	1	1	1	1	1	1	1	1	1	1	1	1	1	1	1	1	1	1	1	1	1	1	1	1	1	1	1	1	1	1	1	1	1
GO:0043062	extracellular structure organization	biological_process	1	1	1	1	1	1	1	1	1	1	1	1	1	1	0.00514118	1	1	1	1	1	1	1	1	1	1	1	1	1	1	1	1	1	1	1	1	1	1	1	1	1	1	0.00804122	1	1	1	1	1
GO:0043064	obsolete flagellum organization	biological_process	1	1	1	1	1	1	1	1	1	1	1	1	1	1	1	1	1	1	1	1	1	1	1	1	0.0002656	0.0002944	1	1	1	1	1	1	1	1	1	1	1	1	1	1	1	1	1	1	9.088e-05	1	1
GO:0043065	positive regulation of apoptotic process	biological_process	1	0.0022848	0.00639277	1	1	1	1	1	1	1	1	1	1	1	1	1	1	1	1	1	1	1	1	1	1	1	1	1	1	1	1	1	1	1	1	1	1	1	1	1	1	1	1	1	1	1	1
GO:0043066	negative regulation of apoptotic process	biological_process	1	1	1	1	1	1	1	1	1	1	1	1	1	1	1	1	1	1	1	1	1	1	1	1	1	1	1	1	1	1	1	1	1	1	1	1	1	1	1	1	1	1	1	1	1	1	1
GO:0043067	regulation of programmed cell death	biological_process	1	1	1	1	1	1	1	1	1	1	1	1	1	1	1	1	1	1	1	1	1	1	1	1	1	1	1	1	1	1	1	1	1	1	1	1	1	0.0030304	1	1	1	1	1	1	1	1	1
GO:0043068	positive regulation of programmed cell death	biological_process	1	1	1	1	1	1	1	1	1	1	1	1	1	1	1	1	1	1	1	1	1	1	1	1	1	1	1	1	1	1	1	1	1	1	1	1	1	0.0004512	1	1	1	1	1	1	1	1	1
GO:0043069	negative regulation of programmed cell death	biological_process	1	1	1	1	1	1	1	1	1	1	1	1	1	1	1	1	1	1	1	1	1	1	1	1	1	1	1	1	1	1	1	1	1	1	1	1	1	1	1	1	1	1	1	1	1	1	1
GO:0043073	germ cell nucleus	cellular_component	1	1	1	1	1	1	1	1	1	1	1	1	1	1	1	1	1	1	1	1	1	1	1	1	1	1	1	1	1	1	1	1	1	1	1	1	1	1	1	1	1	1	1	1	1	1	1
GO:0043085	positive regulation of catalytic activity	biological_process	1	1	1	1	1	1	1	1	1	1	1	1	1	1	1	1	1	1	1	1	1	1	1	1	1	1	1	1	1	1	1	1	1	1	1	1	1	1	1	1	1	1	1	1	1	1	1
GO:0043086	negative regulation of catalytic activity	biological_process	1	1	1	1	1	1	1	1	1	1	1	1	1	1	1	1	1	1	1	1	1	1	1	1	1	1	1	1	1	1	1	1	1	1	1	1	1	1	1	1	1	1	1	1	1	1	1
GO:0043087	regulation of GTPase activity	biological_process	1	1	1	1	1	1	1	1	1	1	1	1	1	1	1	1	1	1	1	1	1	1	1	1	1	1	1	1	1	1	1	1	1	1	1	1	1	1	1	1	1	1	1	1	1	1	1
GO:0043094	cellular metabolic compound salvage	biological_process	1	1	1	1	1	1	1	1	1	1	1	1	1	1	1	1	1	1	1	1	1	1	1	1	1	1	1	1	1	1	1	1	1	1	1	1	1	1	1	1	1	1	1	1	1	1	1
GO:0043112	receptor metabolic process	biological_process	1	1	1	1	1	1	1	1	1	1	1	1	1	1	1	1	1	1	1	1	1	1	1	1	1	1	1	1	1	1	1	1	1	1	1	1	1	1	1	1	1	1	1	1	1	1	1
GO:0043161	proteasome-mediated ubiquitin-dependent protein catabolic process	biological_process	1	1	1	1	1	1	1	1	1	1	1	1	1	1	1	1	1	1	1	1	1	1	1	1	1	1	1	1	1	1	1	1	1	1	1	1	1	1	1	1	1	1	1	1	1	1	1
GO:0043167	ion binding	molecular_function	1	1	1	1	1	1	1	1	1	1	0.0024416	1	1	1	9.28e-06	1	1	1	1	1	0.00931261	4.992e-05	0.0009056	0.00010848	1	1	1	1	1	1	1	0.00746355	1	1	1	1	1	1	0.00021088	1	1	8.832e-06	1.152e-07	0.00011584	1	1	1
GO:0043169	cation binding	molecular_function	1	1	1	1	1	1	1	1	1	1	0.0024416	1	1	1	9.28e-06	1	1	1	1	1	0.00931261	4.992e-05	0.0009056	0.00010848	1	1	1	1	1	1	1	0.00746355	1	1	1	1	1	1	0.00021088	1	1	8.832e-06	1.152e-07	0.00011584	1	1	1
GO:0043170	macromolecule metabolic process	biological_process	0.00475542	3.776e-13	3.904e-17	4.864e-06	1	1	0.0003456	1	1	1	1	1	1	1	1	1	2.1984e-06	1	1	1	1	1	1	1	1	1	1	1	1	1	1	1	1.216e-05	1	0.0013056	1.1264e-08	0.0009408	0.00026592	1	1	1	1	1	1	1	1	1
GO:0043176	amine binding	molecular_function	1	1	1	1	1	1	1	1	1	1	1	1	1	1	1	1	1	1	1	1	1	1	1	1	1	1	1	0.0005888	0.00830906	1	1	1	1	1	1	1	1	1	1	1	1	1	1	1	1	1	1
GO:0043186	P granule	cellular_component	3.68e-16	2.1728e-15	5.44e-07	1	1	1	1	1	1	1	1	1	1	1	1	1	1	1	1	1	1	1	1	1	1	1	1	1	1	1	1	1	1.5968e-20	6.336e-17	1	0.00795123	1	1	1	2.6304e-06	1	1	1	1	1	1	1
GO:0043189	H4/H2A histone acetyltransferase complex	cellular_component	1	1	1	1	1	1	1	1	1	1	1	1	1	1	1	1	1	1	1	1	1	1	1	1	1	1	1	1	1	1	1	1	1	1	1	1	0.003088	0.002944	1	1	1	1	1	1	1	1	1
GO:0043226	organelle	cellular_component	1.9232e-08	5.28e-13	7.68e-11	1	1	1	1.4432e-18	1.824e-09	0.00554938	5.056e-08	1	1	1	1	1	1	1	2.624e-16	1.0784e-07	0.0010208	4.032e-05	1	1	1	1	1	1	1	1	1	1	4.096e-10	4.864e-10	1	4.224e-05	3.0784e-32	1.1744e-42	2.6688e-28	0.00631437	1	1.7728e-12	1.3056e-06	0.0012576	1	1	1	1
GO:0043227	membrane-bounded organelle	cellular_component	4.704e-07	2.3904e-13	3.0752e-10	1	1	1	9.12e-19	1.6096e-06	1	2.6272e-09	1	1	1	1	1	1	1	1.2256e-18	2.7712e-06	0.0004448	6.912e-07	1	1	1	1	1	1	1	1	1	1	8.832e-13	8.96e-07	1	6.848e-05	3.936e-24	1.232e-27	8.192e-24	1	1	4.16e-08	0.0003488	1	1	1	1	1
GO:0043228	non-membrane-bounded organelle	cellular_component	1	1	0.00718019	1	1	1	9.696e-13	8.32e-09	1	1.1424e-05	1	1	1	1	1	1	1	4.48e-07	1	1	1	1	1	1	1	1	1	1	1	1	1	0.0007072	0.0018848	1	1	9.728e-24	1.8464e-49	3.36e-38	0.0004608	1.5264e-06	4.224e-12	1	1	1	1	1	1
GO:0043229	intracellular organelle	cellular_component	1.504e-08	3.552e-13	5.792e-11	1	1	1	1.184e-18	1.6896e-09	0.00531155	4.64e-08	1	1	1	1	1	1	1	1.2064e-15	9.536e-08	0.0009632	3.616e-05	1	1	1	1	1	1	1	1	1	1	6.4e-10	3.808e-10	1	5.984e-05	2.2016e-32	8.64e-43	2.0992e-28	0.00568598	1	7.104e-12	2.0736e-06	0.001808	1	1	1	1
GO:0043231	intracellular membrane-bounded organelle	cellular_component	3.68e-07	1.5264e-13	2.2688e-10	1	1	1	7.264e-19	1.4976e-06	1	2.3616e-09	1	1	1	1	1	1	1	6.784e-18	2.4448e-06	0.000416	5.952e-07	1	1	1	1	1	1	1	1	1	1	1.4848e-12	1.1936e-06	1	9.888e-05	2.8512e-24	9.376e-28	6.368e-24	1	1	8.768e-08	0.00030816	1	1	1	1	1
GO:0043232	intracellular non-membrane-bounded organelle	cellular_component	1	1	0.00718019	1	1	1	9.696e-13	8.32e-09	1	1.1424e-05	1	1	1	1	1	1	1	4.48e-07	1	1	1	1	1	1	1	1	1	1	1	1	1	0.0007072	0.0018848	1	1	9.728e-24	1.8464e-49	3.36e-38	0.0004608	1.5264e-06	4.224e-12	1	1	1	1	1	1
GO:0043233	organelle lumen	cellular_component	1	0.0004416	0.0004736	1	1	1	0.000816	1	1	0.00899376	1	1	1	1	1	1	1	1.4656e-05	1	1	1	1	1	1	1	1	1	1	1	1	1	4.352e-06	1	1	1	7.328e-07	7.936e-09	5.184e-05	0.00010272	1	1	1	1	1	1	1	1
GO:0043234	protein complex	cellular_component	0.0006048	4.48e-10	3.776e-17	1	1	1	1	1	1	1	1	1	1	1	1	1	1	1	1	1	1	1	1	1	1	1	1	1	1	1	1	1	1	1	1	4.32e-08	3.808e-07	0.00581981	1	1	1	1	1	1	1	1	1
GO:0043235	receptor complex	cellular_component	1	1	1	1	1	1	1	1	1	1	1	1	1	1	1	1	1	1	1	1	1	1	1	1	1	1	1	1	1	1	1	1	1	1	1	1	1	1	1	1	1	1	1	1	1	1	1
GO:0043241	protein complex disassembly	biological_process	1	1	1	1	1	1	1	1	1	1	1	1	1	1	1	1	1	1	1	1	1	1	1	1	1	1	1	1	1	1	1	1	1	1	1	1	1	1	1	1	1	1	1	1	1	1	1
GO:0043242	negative regulation of protein complex disassembly	biological_process	1	1	1	1	1	1	1	1	1	1	1	1	1	1	1	1	1	1	1	1	1	1	1	1	1	1	1	1	1	1	1	1	1	1	1	1	1	1	1	1	1	1	1	1	1	1	1
GO:0043244	regulation of protein complex disassembly	biological_process	1	1	1	1	1	1	1	1	1	1	1	1	1	1	1	1	1	1	1	1	1	1	1	1	1	1	1	1	1	1	1	1	1	1	1	1	1	1	1	1	1	1	1	1	1	1	1
GO:0043254	regulation of protein complex assembly	biological_process	1	1	1	1	1	1	1	1	1	1	1	1	1	1	1	1	1	1	1	1	1	1	1	1	1	1	1	1	1	1	1	1	1	1	1	1	1	1	1	1	1	1	1	1	1	1	1
GO:0043266	regulation of potassium ion transport	biological_process	1	1	1	1	1	1	1	1	1	1	1	1	1	1	1	1	1	1	1	1	1	1	1	1	1	1	1	1	1	1	1	1	1	1	1	1	1	1	1	1	1	1	1	1	1	1	1
GO:0043269	regulation of ion transport	biological_process	1	1	1	1	1	1	1	1	1	1	1	1	1	1	1	1	1	1	1	1	1	1	1	1	1	1	1	1	1	1	1	1	1	1	1	1	1	1	1	1	1	1	1	1	1	1	1
GO:0043277	apoptotic cell clearance	biological_process	1	1	1	1	1	1	1	1	1	1	1	1	1	1	1	1	1	1	1	1	1	1	1	1	1	1	1	1	1	1	1	1	1	1	1	1	1	1	1	1	1	1	1	1	1	1	1
GO:0043282	pharyngeal muscle development	biological_process	1	1	1	1	1	1	1	1	1	1	1	1	1	1	1	1	1	1	1	1	1	1	1	1	1	1	1	1	1	1	1	1	1	1	1	1	1	1	1	1	1	1	1	1	1	1	1
GO:0043292	contractile fiber	cellular_component	1	1	1	1	1	1	1	1	1	1	1	1	1	1	1	1	1	1	1	1	1	1	1	1	1	1	0.0005952	1	1	1	0.00555014	1	1	1	1	1	1	1	1	0.00792634	1	3.872e-05	2.2304e-14	3.776e-21	2.3968e-11	1	1
GO:0043296	apical junction complex	cellular_component	1	1	1	1	1	1	1	1	1	1	1	1	1	1	1	1	1	1	1	1	1	1	1	1	1	1	1	1	1	1	1	1	1	1	1	1	1	1	1	1	1	1	0.00104	1	1	1	1
GO:0043331	response to dsRNA	biological_process	1	1	1	1	1	1	1	1	1	1	1	1	1	1	1	1	1	1	1	1	1	1	1	1	1	1	1	1	1	1	1	1	1	1	1	1	1	1	1	1	1	1	1	1	1	1	1
GO:0043405	regulation of MAP kinase activity	biological_process	1	1	1	1	1	1	1	1	1	1	1	1	1	1	1	1	1	1	1	1	1	1	1	1	1	1	1	1	1	1	1	1	1	1	1	1	1	1	1	1	1	1	1	1	1	1	1
GO:0043408	regulation of MAPK cascade	biological_process	1	1	1	1	1	1	1	1	1	1	1	1	1	1	1	1	1	1	1	1	1	1	1	1	1	1	1	1	1	1	1	1	1	1	1	1	1	1	1	1	1	1	1	1	1	1	1
GO:0043412	macromolecule modification	biological_process	1	1	1	1	1	1	1	1	1	1	1	1	1	1	1	1	1	1	1	1	1	1	1	1	1	1	1	1	1	1	1	1	1	1	1	1	1	1	1	1	1	1	1	1	1	1	1
GO:0043413	macromolecule glycosylation	biological_process	1	1	1	1	1	1	1	1	1	1	1	1	1	1	1	1	1	1	1	1	1	1	1	1	1	1	1	1	1	1	1	1	1	1	1	1	1	1	1	1	1	1	1	1	1	1	1
GO:0043414	macromolecule methylation	biological_process	1	1	1	1	1	1	1	1	1	1	1	1	1	1	1	1	1	1	1	1	1	1	1	1	1	1	1	1	1	1	1	1	1	1	1	1	1	1	1	1	1	1	1	1	1	1	1
GO:0043434	response to peptide hormone	biological_process	1	1	1	1	1	1	1	1	1	1	1	1	1	1	1	1	1	1	1	1	1	1	1	1	1	1	1	1	1	1	1	1	1	1	1	1	1	1	1	1	1	1	1	1	1	1	1
GO:0043436	oxoacid metabolic process	biological_process	1	0.0025216	1	1	1	1	1	1	1	1	1	1	1	1	1	1	1	1	1	1	1	1	1	1	1	1	1	1	1	1	1	1	1	1	1	1	1	1	1	1	0.0005728	1	1	1	1	1	1
GO:0043492	ATPase activity	coupled to movement of substances	molecular_function	1	1	1	1	1	1	1	1	1	1	1	1	1	1	1	1	1	1	1	1	1	1	1	1	1	1	1	1	1	1	0.00672074	1	0.00864995	1	1	1	1	1	1	1	1	1	1	1	1	1
GO:0043545	molybdopterin cofactor metabolic process	biological_process	1	1	1	1	1	1	1	1	1	1	1	1	1	1	1	1	1	1	1	1	1	1	1	1	1	1	1	1	1	1	1	1	1	1	1	1	1	1	1	1	1	1	1	1	1	1	1
GO:0043549	regulation of kinase activity	biological_process	1	1	1	1	1	1	1	1	1	1	1	1	1	1	1	1	1	1	1	1	0.0031744	1	1	1	1	1	1	1	1	1	1	1	1	1	1	1	1	1	1	1	1	1	1	1	1	1	1
GO:0043565	sequence-specific DNA binding	molecular_function	1	1	1	1	1	1	1	3.52e-08	1	7.392e-09	1	1	1	1	1	1	1	8.672e-12	4.832e-05	1	1.1168e-07	1	1	0.000368	1	1	1	1	1	1	1	4.672e-08	1	1	1	0.00899565	6.112e-12	6.368e-21	1	5.12e-09	1.3184e-17	1.3216e-07	0.0014208	1	1	1	1
GO:0043566	structure-specific DNA binding	molecular_function	1	1	1	1	1	1	1	1	1	1	1	1	1	1	1	1	1	1	1	1	1	1	1	1	1	1	1	1	1	1	1	1	1	1	1	1	1	1	1	1	1	1	1	1	1	1	1
GO:0043621	protein self-association	molecular_function	1	1	0.000848	1	1	1	1	1	1	1	1	1	1	1	1	1	1	1	1	1	1	1	1	1	1	1	1	1	1	1	1	1	1	5.472e-05	1	1	1	1	1	1	1	1	1	1	1	1	1
GO:0043623	cellular protein complex assembly	biological_process	1	1	1	1	1	1	1	1	1	1	1	1	1	1	1	1	1	1	1	1	1	1	1	0.00683318	1	1	1	1	1	1	1	1	1	1	1	1	1	1	1	1	1	1	5.6e-06	1.9712e-05	1	1	1
GO:0043624	cellular protein complex disassembly	biological_process	1	1	1	1	1	1	1	1	1	1	1	1	1	1	1	1	1	1	1	1	1	1	1	1	1	1	1	1	1	1	1	1	1	1	1	1	1	1	1	1	1	1	1	1	1	1	1
GO:0043631	RNA polyadenylation	biological_process	1	1	1	1	1	1	1	1	1	1	1	1	1	1	1	1	1	1	1	1	1	1	1	1	1	1	1	1	1	1	1	1	1	1	1	1	1	1	1	1	1	1	1	1	1	1	1
GO:0043632	modification-dependent macromolecule catabolic process	biological_process	0.00397075	3.584e-07	2.592e-05	8.672e-06	7.296e-06	1	1	1	1	1	1	1	1	1	1	1	0.0019456	1	1	1	1	1	1	1	1	1	1	1	1	1	1	1	1	0.00288	1	1	1	1	1	1	1	1	1	1	1	1	1
GO:0043648	dicarboxylic acid metabolic process	biological_process	1	1	1	1	1	1	1	1	1	1	1	1	1	1	1	1	1	1	1	1	1	1	1	1	1	1	1	1	1	1	1	1	1	1	1	1	1	1	1	1	1	1	1	1	1	1	1
GO:0043652	engulfment of apoptotic cell	biological_process	1	1	1	1	1	1	1	1	1	1	1	1	1	1	1	1	1	1	1	1	1	1	1	1	1	1	1	1	1	1	1	1	1	1	1	1	1	1	1	1	1	1	1	1	1	1	1
GO:0043687	post-translational protein modification	biological_process	1	1	1	1	1	1	1	1	1	1	1	1	1	1	1	1	1	1	1	1	1	1	1	1	1	1	1	1	1	1	1	1	1	1	1	1	1	1	1	1	1	1	1	1	1	1	1
GO:0043900	regulation of multi-organism process	biological_process	1	1	1	1	1	1	1	1	1	1	1	1	1	1	1	1	1	1	1	1	1	1	1	1	1	1	1	1	1	1	1	1	1	1	1	1	1	1	1	1	1	1	1	1	1	1	1
GO:0043933	macromolecular complex subunit organization	biological_process	1	1	1	1	1	1	3.52e-12	2.3328e-10	1	1.7216e-11	1	1	1	1	1	1	1	1.0944e-07	9.632e-05	1	1	1	1	1	1	1	1	1	1	1	1	0.00380499	1	1	1	3.296e-11	2.3648e-34	1.2224e-33	1	1.8464e-12	7.84e-16	1	0.0080767	1	1	1	1
GO:0044036	cell wall macromolecule metabolic process	biological_process	1	1	1	1	1	1	1	1	1	1	1	1	1	1	1	1	1	1	1	1	1	1	1	1	1	1	1	1	1	1	1	1	1	1	1	1	1	1	1	1	1	1	1	1	1	1	1
GO:0044038	cell wall macromolecule biosynthetic process	biological_process	1	1	1	1	1	1	1	1	1	1	1	1	1	1	1	1	1	1	1	1	1	1	1	1	1	1	1	1	1	1	1	1	1	1	1	1	1	1	1	1	1	1	1	1	1	1	1
GO:0044042	glucan metabolic process	biological_process	1	1	1	1	1	1	1	1	1	1	1	1	1	1	1	1	1	1	1	1	1	1	1	1	1	1	1	1	1	1	1	1	1	1	1	1	1	1	1	1	1	1	1	1	1	1	1
GO:0044057	regulation of system process	biological_process	1	1	1	1	1	1	1	1	1	1	1	1	1	1	1	1	1	1	1	1	1	1	1	1	1	1	0.00360387	0.0001728	1	1	1	1	1	1	1	1	1	1	1	1	1	1	1	0.002944	1	0.00625155	1
GO:0044085	cellular component biogenesis	biological_process	1	1	1	1	1	1	5.728e-10	2.2592e-08	1	8.224e-10	1	1	1	1	1	1	1	3.456e-09	0.0011104	1	1	1	1	0.00846384	1	1	1	1	1	1	1	0.00945405	1	1	1	2.5312e-08	1.872e-28	7.072e-28	0.0041929	2.0032e-09	1.7824e-10	1	2.8448e-05	0.00015936	1	1	1
GO:0044087	regulation of cellular component biogenesis	biological_process	1	1	1	1	1	1	1	1	1	1	1	1	1	1	1	1	1	1	1	1	1	1	1	1	1	1	1	1	1	1	1	1	1	1	1	1	1	1	1	1	1	1	1	1	1	1	1
GO:0044092	negative regulation of molecular function	biological_process	1	1	1	1	1	1	1	1	1	1	1	1	1	1	1	1	1	1	1	1	1	1	1	1	1	1	1	1	1	1	1	1	1	1	1	1	1	1	1	1	1	1	1	1	1	1	1
GO:0044093	positive regulation of molecular function	biological_process	1	1	1	1	1	1	1	1	1	1	1	1	1	1	1	1	1	1	1	1	1	1	1	1	1	1	1	1	1	1	1	1	1	1	1	1	1	1	1	1	1	1	1	1	1	1	1
GO:0044106	cellular amine metabolic process	biological_process	1	1	1	1	1	1	1	1	1	1	1	1	1	1	1	1	1	1	1	1	1	1	1	1	1	1	1	1	1	1	1	1	1	1	1	1	1	1	1	1	0.00031264	1	1	1	1	1	1
GO:0044111	development involved in symbiotic interaction	biological_process	1	1	1	1	1	1	1	1	1	1	1	1	1	1	1	1	1	1	1	1	1	1	1	1	1	1	1	1	1	1	1	1	1	1	1	1	1	1	1	1	1	1	1	1	1	1	1
GO:0044115	development of symbiont involved in interaction with host	biological_process	1	1	1	1	1	1	1	1	1	1	1	1	1	1	1	1	1	1	1	1	1	1	1	1	1	1	1	1	1	1	1	1	1	1	1	1	1	1	1	1	1	1	1	1	1	1	1
GO:0044237	cellular metabolic process	biological_process	4.384e-10	5.6e-24	2.896e-24	3.456e-08	8.256e-05	0.0003232	1.5392e-06	1	1	1	0.0006816	1	1	1	1	1	4.736e-07	0.00022112	0.00662147	1	0.001488	1	1	1	1	1	1	1	1	1	1	6.24e-06	2.032e-11	1	2.832e-06	3.552e-08	1	0.0019904	1	1	2.7136e-06	1	1	1	1	1	1
GO:0044238	primary metabolic process	biological_process	8.224e-05	7.712e-14	2.6304e-17	2.8032e-06	0.0028288	1	0.00014272	1	1	1	0.0047855	1	1	1	1	1	9.952e-06	0.00379882	1	1	0.00414989	1	1	1	1	1	1	1	1	1	1	0.00048	1.1328e-09	1	0.001184	1.0304e-06	1	0.00552378	1	1	0.00540221	1	1	1	1	1	1
GO:0044242	cellular lipid catabolic process	biological_process	1	1	1	1	1	1	1	1	1	1	1	1	1	1	1	1	1	1	1	1	1	1	1	1	1	1	1	1	1	1	1	1	1	1	1	1	1	1	1	1	1	1	1	1	1	1	1
GO:0044248	cellular catabolic process	biological_process	3.0272e-09	1.2352e-11	9.376e-08	0.0005568	0.0006944	1	1	1	1	1	1	1	1	1	1	1	1	0.0007168	1	1	1	1	1	1	1	1	1	1	1	1	1	0.0016576	1.376e-06	0.00712256	1	1	1	1	1	1	1	1	1	1	1	1	1
GO:0044249	cellular biosynthetic process	biological_process	1	1	0.00022624	1	1	1	0.00822416	1	1	1	1	1	1	1	1	1	0.0008416	0.00473638	1	1	0.00017888	1	1	1	1	1	1	1	1	1	1	0.00014688	1	1	5.376e-07	4.672e-07	0.0045808	0.0003936	1	1	1.3184e-09	1	1	1	1	1	1
GO:0044255	cellular lipid metabolic process	biological_process	1	1	1	1	1	1	1	1	1	1	0.00346179	1	1	1	1	1	1	1	1	1	1	1	1	1	1	1	1	1	1	1	1	1	1	1	1	1	1	1	1	1	1	1	1	1	1	1	1
GO:0044257	cellular protein catabolic process	biological_process	1.1552e-05	6.816e-11	7.008e-09	7.456e-06	2.3488e-05	1	1	1	1	1	1	1	1	1	1	1	0.0051175	1	1	1	1	1	1	1	1	1	1	1	1	1	1	1	0.0005792	1.2352e-06	1	1	1	1	1	1	1	1	1	1	1	1	1
GO:0044260	cellular macromolecule metabolic process	biological_process	0.0005184	3.0432e-15	8.32e-19	4.448e-07	0.00687565	1	7.008e-05	1	1	1	1	1	1	1	1	1	1.632e-07	0.00982771	1	1	1	1	1	1	1	1	1	1	1	1	1	1	8.832e-06	1	4.544e-05	1.0752e-08	0.0008384	0.0015168	1	1	1	1	1	1	1	1	1
GO:0044262	cellular carbohydrate metabolic process	biological_process	1	1	1	1	1	1	1	1	1	1	1	1	1	1	1	1	1	1	1	1	1	1	1	1	1	1	1	1	1	1	1	1	1	1	1	1	1	1	1	1	1	1	1	1	1	1	1
GO:0044264	cellular polysaccharide metabolic process	biological_process	1	1	1	1	1	1	1	1	1	1	1	1	1	1	1	1	1	1	1	1	1	1	1	1	1	1	1	1	1	1	1	1	1	1	1	1	1	1	1	1	1	1	1	1	1	1	1
GO:0044265	cellular macromolecule catabolic process	biological_process	1.3248e-06	4e-12	1.2128e-09	2.0736e-05	0.0004256	1	1	1	1	1	1	1	1	1	1	1	1	0.00437386	1	1	1	1	1	1	1	1	1	1	1	1	1	1	0.00010144	5.408e-06	1	0.0016672	1	1	1	1	1	1	1	1	1	1	1
GO:0044267	cellular protein metabolic process	biological_process	0.0014112	2.368e-10	4.256e-07	1	1	1	1	1	1	1	1	1	1	1	1	1	1	1	1	1	1	1	1	1	1	1	1	1	1	1	1	1	7.424e-08	1	1	1	1	1	1	1	1	1	1	1	1	1	1
GO:0044270	cellular nitrogen compound catabolic process	biological_process	1	1	1	1	1	1	1	1	1	1	1	1	1	1	1	1	1	1	1	1	1	1	1	1	1	1	1	1	1	1	1	1	1	1	1	1	1	1	1	1	1	1	1	1	1	1	1
GO:0044271	cellular nitrogen compound biosynthetic process	biological_process	1	1	1	1	1	1	1	1	1	1	1	1	1	1	1	1	1	1	1	1	1	1	1	1	1	1	0.00846115	1.5296e-07	1	1	1	1	1	1	1	1	1	1	1	1	1	1	1	1	1	1	1
GO:0044272	sulfur compound biosynthetic process	biological_process	1	1	1	1	1	1	1	1	1	1	1	1	1	1	1	1	1	1	1	1	1	1	1	1	1	1	1	1	1	1	1	1	1	1	1	1	1	1	1	1	1	1	1	1	1	1	1
GO:0044275	cellular carbohydrate catabolic process	biological_process	0.0021568	1	1	1	1	1	1	1	1	1	1	1	1	1	1	1	1	1	1	1	1	1	1	1	1	1	1	1	1	1	1	1	1	1	1	1	1	1	1	1	1	1	1	1	1	1	1
GO:0044281	small molecule metabolic process	biological_process	0.0001184	4.256e-07	5.568e-06	1	1	0.0022112	1	1	1	1	1	1	1	1	1	1	1	1	1	1	1	1	1	1	1	1	1	1	1	1	1	1	0.00010304	1	1	1	1	1	1	1	1	1	1	1	1	1	1
GO:0044282	small molecule catabolic process	biological_process	0.00613248	1	1	1	1	1	1	1	1	1	1	1	1	1	1	1	1	1	1	1	1	1	1	1	1	1	1	1	1	1	1	1	1	1	1	1	1	1	1	1	1	1	1	1	1	1	1
GO:0044283	small molecule biosynthetic process	biological_process	1	1	1	1	1	1	1	1	1	1	1	1	1	1	1	1	1	1	1	1	1	1	1	1	1	1	0.0003936	3.296e-09	1	1	1	1	1	1	1	1	1	1	1	1	1	1	1	1	1	1	1
GO:0044297	cell body	cellular_component	1	1	1	1	1	1	1	1	1	1	1	1	1	1	1	1	1	1	1	1	1	1	1	1	1	1	1	1	1	1	1	1	1	1	1	1	1	1	1	1	1	1	1	1	1	1	1
GO:0044298	cell body membrane	cellular_component	1	1	1	1	1	1	1	1	1	1	1	1	1	1	1	1	1	1	1	1	1	1	1	1	1	1	1	1	1	1	1	1	1	1	1	1	1	1	1	1	1	1	1	1	1	1	1
GO:0044403	symbiosis	encompassing mutualism through parasitism	biological_process	1	1	1	1	1	1	1	1	1	1	1	1	1	1	1	1	1	1	1	1	1	1	1	1	1	1	1	1	1	1	1	1	1	1	1	1	1	1	1	1	1	1	1	1	1	1
GO:0044419	interspecies interaction between organisms	biological_process	1	1	1	1	1	1	1	1	1	1	1	1	1	1	1	1	1	1	1	1	1	1	1	1	1	1	1	1	1	1	1	1	1	1	1	1	1	1	1	1	1	1	1	1	1	1	1
GO:0044420	extracellular matrix component	cellular_component	1	1	1	1	1	1	1	1	1	1	1	1	1	1	0.00966589	1	1	1	1	1	1	1	1	1	1	1	1	1	1	1	1	1	1	1	1	1	1	1	8.192e-07	5.28e-06	0.00029984	2.1216e-07	2.256e-07	0.0003744	1	1	1
GO:0044421	extracellular region part	cellular_component	1	1	1	1	1	1	1	1	1	1	1	1	1	1	0.00011808	1	1	1	1	1	1	1	1	0.00014464	1	1	1	1	1	1	1	1	1	1	1	1	1	1	5.92e-06	2.1536e-08	0.0019264	1.168e-09	1.2992e-10	1.1328e-08	1	1	1
GO:0044422	organelle part	cellular_component	0.0003936	5.632e-10	1.216e-06	1	1	1	9.92e-18	2.9984e-11	0.00020544	4.736e-09	1	1	1	1	1	1	1	3.968e-12	0.0007008	1	1	1	1	1	1	1	1	1	1	1	1	1.3088e-05	0.0014016	1	1	5.568e-24	1.5168e-49	3.36e-36	2.7072e-07	1	0.00013728	1	1	1	1	1	1
GO:0044424	intracellular part	cellular_component	1.7824e-21	8.352e-32	1.808e-24	1	1	1	7.808e-17	1.2736e-08	1	8.672e-08	1	1	1	0.0020864	1	1	1	1.9936e-20	2.7392e-10	9.728e-05	6.048e-05	1	1	1	1	1	1	1	1	1	1	4.544e-11	7.904e-22	6.272e-05	1.2864e-05	1.4144e-29	2.3104e-38	1.8016e-29	0.0017184	1	1.4592e-12	6.176e-07	1	1	1	1	1
GO:0044425	membrane part	cellular_component	1	1	1	1	1	1	1	1	1	1	1	1	1	1	1	1	1	1	1	1	1	1	1	1	1	1	3.904e-05	2.3648e-17	4.64e-57	3.1232e-48	5.344e-07	1	1	1	1	1	1	1	1	1	1	1	1	1	0.001072	5.344e-16	1
GO:0044427	chromosomal part	cellular_component	1	1	1	1	1	0.00030784	2.3968e-20	7.104e-19	1	7.648e-16	1	1	1	1	1	1	1	5.856e-15	5.792e-05	0.0003328	1	1	1	1	1	1	1	1	1	1	1	1.8208e-10	1	1	1	7.072e-25	7.296e-67	1.7184e-59	1	1.7824e-13	2.0416e-20	1	1	1	1	1	1
GO:0044428	nuclear part	cellular_component	1	0.00010112	9.216e-06	1	1	1	3.328e-05	1	0.003136	1	1	1	1	1	1	1	1	3.424e-06	1	1	1	1	1	1	1	1	1	1	1	1	1	0.00027296	1	1	1	2.7744e-13	2.3552e-10	7.424e-06	2.6304e-06	1	1	1	1	1	1	1	1
GO:0044429	mitochondrial part	cellular_component	1	4.864e-05	0.00344294	1	1	1	1	1	1	1	1	1	1	1	1	1	1	1	1	1	1	1	1	1	1	1	1	1	1	1	1	1	1	1	0.008364	1	1	1	1	1	1	1	1	1	1	1	1
GO:0044430	cytoskeletal part	cellular_component	1	1	1	1	1	1	1	1	0.00552566	1	1	1	1	1	1	1	1	1	1	1	1	1	1	1	1	1	1	1	1	1	1	1	1	1	1	8.256e-07	1.2352e-09	0.00540774	0.0003936	1	1	1	1	0.0024416	0.00019232	1	1
GO:0044431	Golgi apparatus part	cellular_component	1	1	1	1	1	1	1	1	1	1	1	1	1	1	1	1	1	1	1	1	1	1	1	1	1	1	1	1	1	1	1	1	1	1	1	1	1	1	1	1	1	1	1	1	1	1	1
GO:0044432	endoplasmic reticulum part	cellular_component	1	0.00014976	1	1	1	1	1	1	1	1	1	1	1	1	1	1	1	1	1	1	1	1	1	1	1	1	1	1	1	1	1	1	1	1	1	1	1	1	1	1	1	1	1	1	1	1	1
GO:0044433	cytoplasmic vesicle part	cellular_component	1	1	1	1	1	1	1	1	1	1	1	1	1	1	1	1	1	1	1	1	1	1	1	1	1	1	1	1	1	1	1	1	1	1	1	1	1	1	1	1	1	1	1	1	1	1	1
GO:0044437	vacuolar part	cellular_component	1	1	1	1	1	1	1	1	1	1	1	1	1	1	1	1	1	1	1	1	1	1	1	1	1	1	1	1	1	1	1	1	1	1	1	1	1	1	1	1	1	1	1	1	1	1	1
GO:0044440	endosomal part	cellular_component	1	1	1	1	1	1	1	1	1	1	1	1	1	1	1	1	1	1	1	1	1	1	1	1	1	1	1	1	1	1	1	1	1	1	1	1	1	1	1	1	1	1	1	1	1	1	1
GO:0044441	ciliary part	cellular_component	1	1	1	1	1	1	1	1	1	1	1	1	1	1	1	1	1	1	1	1	1	1	1	1	1	1	1	1	1	1	1	1	1	1	1	1	1	1	1	1	1	1	1	1	1	1	1
GO:0044444	cytoplasmic part	cellular_component	5.984e-15	7.52e-18	0.0001328	1	1	1	1	1	1	1	1	1	1	1	1	1	1	1	1	1	1	1	1	1	1	1	1	1	1	1	1	1	3.36e-19	1	1	1	1	1	1	1	0.0029088	1	1	1	1	1	1
GO:0044445	cytosolic part	cellular_component	1	1	1	1	1	1	1	1	1	1	1	1	1	1	1	1	1	1	1	1	1	1	1	1	1	1	1	1	1	1	1	1	1	1	1	1	1	1	1	1	1	1	1	1	1	1	1
GO:0044446	intracellular organelle part	cellular_component	5.632e-05	6.848e-12	4.832e-08	1	1	1	5.024e-19	7.872e-12	9.152e-05	1.1424e-09	1	1	1	1	1	1	1	1.6384e-11	0.0004736	0.00669827	1	1	1	1	1	1	1	1	1	1	1	6.592e-06	0.00028608	1	1	7.008e-26	6.336e-52	3.936e-38	2.0352e-05	1	0.0013088	1	1	1	1	1	1
GO:0044447	axoneme part	cellular_component	1	1	1	1	1	1	1	1	1	1	1	1	1	1	1	1	1	1	1	1	1	1	1	1	1	1	1	1	1	1	1	1	1	1	1	1	1	1	1	1	1	1	1	1	1	1	1
GO:0044448	cell cortex part	cellular_component	1	1	1	1	1	1	1	1	1	1	1	1	1	1	1	1	1	1	1	1	1	1	1	1	1	1	1	1	1	1	1	1	1	1	1	1	1	1	1	1	1	1	1	1	1	1	1
GO:0044449	contractile fiber part	cellular_component	1	1	1	1	1	1	1	1	1	1	1	1	1	1	1	1	1	1	1	1	1	1	1	1	1	1	0.00022112	1	1	1	0.0025984	1	1	1	1	1	1	1	1	1	1	0.0001232	6.176e-14	3.088e-20	3.1968e-11	1	1
GO:0044450	microtubule organizing center part	cellular_component	1	1	1	1	1	1	1	1	1	1	1	1	1	1	1	1	1	1	1	1	1	1	1	1	1	1	1	1	1	1	1	1	1	1	1	1	0.0004448	1	1	1	1	1	1	1	1	1	1
GO:0044451	nucleoplasm part	cellular_component	1	1	1	1	1	1	0.00664672	1	1	1	1	1	1	1	1	1	1	9.952e-05	1	1	1	1	1	1	1	1	1	1	1	1	1	1	1	1	1	0.00023552	0.000528	1	1	1	1	1	1	1	1	1	1
GO:0044454	nuclear chromosome part	cellular_component	1	1	0.00639277	1	1	1	1	1	1	1	1	1	1	1	1	1	1	1	1	1	1	1	1	1	1	1	1	1	1	1	1	1	1	1	1	1	1	1	1	1	1	1	1	1	1	1	1
GO:0044455	mitochondrial membrane part	cellular_component	1	9.472e-05	5.28e-05	1	1	1	1	1	1	1	1	1	1	1	1	1	1	1	1	1	1	1	1	1	1	1	1	1	1	1	1	1	1	1	1	1	1	1	1	1	1	1	1	1	1	1	1
GO:0044456	synapse part	cellular_component	1	1	1	1	1	1	1	1	1	1	1	1	1	1	1	1	1	1	1	1	1	1	1	1	1	1	7.36e-05	2.8608e-21	1.7792e-25	1.5232e-15	1	1	1	1	1	1	1	1	1	1	1	1	1	1	1	1.3536e-11	1
GO:0044459	plasma membrane part	cellular_component	1	1	1	1	1	1	1	1	1	1	1	1	1	1	0.0027328	1	1	1	1	1	1	1.9968e-05	1	1	1	1	1	1	0.0025056	1	0.002096	1	1	1	1	1	1	1	4.096e-05	0.0001616	1	6.752e-09	8.128e-09	6.528e-11	1	0.0004256	1
GO:0044462	external encapsulating structure part	cellular_component	1	1	1	1	1	1	1	1	1	1	1	1	1	1	1	1	1	1	1	1	1	1	1	1	1	1	1	8.224e-07	1	1	1	1	1	1	1	1	1	1	1	1	1	1	1	1	1	1	1
GO:0044463	cell projection part	cellular_component	1	1	1	1	1	1	1	1	1	1	1	1	1	1	1	1	1	1	1	1	1	1	1	1	0.00475734	1	1	1	1	1	1	1	1	1	1	1	1	1	1	1	1	1	1	1	1	1	1
GO:0044464	cell part	cellular_component	1	1	1	1	1	1	1	1	1	1	1	1	1	1	1	1	1	1	1	1	1	1	1	1	1	1	1	1.4496e-05	8.544e-11	2.8704e-07	0.00486707	1	1	1	1	1	1	1	1	0.00874099	1	0.001104	1	1	1	1	1
GO:0045017	glycerolipid biosynthetic process	biological_process	1	1	1	1	1	1	1	1	1	1	1	1	1	1	1	1	1	1	1	1	1	1	1	1	1	1	1	1	1	1	1	1	1	1	1	1	1	1	1	1	1	1	1	1	1	1	1
GO:0045026	plasma membrane fusion	biological_process	1	1	1	1	1	1	1	1	1	1	1	1	1	1	1	1	1	1	1	1	1	1	1	1	1	1	1	1	1	1	1	1	1	1	1	1	1	1	1	1	1	1	1	1	1	1	1
GO:0045047	protein targeting to ER	biological_process	1	1	1	1	1	1	1	1	1	1	1	1	1	1	1	1	1	1	1	1	1	1	1	1	1	1	1	1	1	1	1	1	1	1	1	1	1	1	1	1	1	1	1	1	1	1	1
GO:0045087	innate immune response	biological_process	1	1	1	1	1	1	1	1	1	1	1	1	1	1	1	1	1	1	1	1	1	1	1	1	1	1	1	1	1	1	1	1	1	1	1	1	1	1	1	1	1	1	1	1	1	1	1
GO:0045111	intermediate filament cytoskeleton	cellular_component	1	1	1	1	1	1	1	1	1	1	1	1	1	1	1	1	1	1	1	1	1	1	1	1	1	1	1	1	1	1	1	1	1	1	1	1	1	1	1	1	1	0.0010496	1	1	1	1	1
GO:0045121	membrane raft	cellular_component	1	1	1	1	1	1	1	1	1	1	1	1	1	1	1	1	1	1	1	1	1	1	1	1	1	1	1	1	1	1	1	1	1	1	1	1	1	1	1	1	1	1	1	1	1	1	1
GO:0045132	meiotic chromosome segregation	biological_process	8.96e-10	5.12e-15	4.096e-06	1	1	1	1	1	1	1	1	1	1	1	1	1	1	1	1	1	1	1	1	1	1	1	1	1	1	1	1	1	2.544e-08	0.00031136	1	3.616e-09	5.728e-11	0.00934656	1	1	1	1	1	1	1	1	1
GO:0045137	development of primary sexual characteristics	biological_process	1	1	1	1	1	1	1	1	1	1	1	1	1	1	1	1	1	0.003008	1	1	1	1	1	1	1	1	1	1	1	1	1	1	1	1	1	1	1	1	5.728e-05	1	1	1	1	1	1	1	1
GO:0045138	nematode male tail tip morphogenesis	biological_process	1	1	1	1	1	1	1	1	1	1	1	1	1	1	1	1	1	0.0022176	1	1	1	1	1	1	1	1	1	1	1	1	1	1	1	1	1	1	1	1	1	1	1	3.872e-05	1	1	1	1	1
GO:0045144	meiotic sister chromatid segregation	biological_process	1	1	1	1	1	1	1	1	1	1	1	1	1	1	1	1	1	1	1	1	1	1	1	1	1	1	1	1	1	1	1	1	1	1	1	1	1	1	1	1	1	1	1	1	1	1	1
GO:0045165	cell fate commitment	biological_process	1	1	1	1	1	1	1	1	1	1	1	1	1	1	1	1	1	2.4416e-10	5.216e-06	1	0.0006976	1	1	1	1	1	1	1	1	1	1	3.936e-06	0.0005152	1	1	4.096e-07	0.0016896	1	1	1	1.5936e-06	1.6896e-07	1	1	1	1	1
GO:0045167	asymmetric protein localization involved in cell fate determination	biological_process	1	1	1	1	1	1	1	1	1	1	1	1	1	1	1	1	1	1	1	1	1	1	1	1	1	1	1	1	1	1	1	1	0.00020256	1	1	1	1	1	1	1	1	1	1	1	1	1	1
GO:0045168	cell-cell signaling involved in cell fate commitment	biological_process	1	1	1	1	1	1	1	1	1	1	1	1	1	1	1	1	1	1	1	1	1	1	1	1	1	1	1	1	1	1	1	1	1	1	1	1	1	1	1	1	1	1	1	1	1	1	1
GO:0045177	apical part of cell	cellular_component	1	1	1	1	1	1	1	1	1	1	1	1	1	1	1	1	1	1	1	1	1	1	1	1	1	1	1	1	1	1	1	1	1	1	1	1	1	1	1	1	1	1	1	4.064e-05	1	1	1
GO:0045178	basal part of cell	cellular_component	1	1	1	1	1	1	1	1	1	1	1	1	1	1	1	1	1	1	1	1	1	0.00465091	1	1	1	1	1	1	1	1	1	1	1	1	1	1	1	1	0.0018624	1	1	0.0010112	1	1	1	1	1
GO:0045184	establishment of protein localization	biological_process	0.00012256	0.001024	1	1	1	1	1	1	1	1	1	1	1	1	1	1	1	1	1	1	1	1	1	1	1	1	1	1	1	1	1	1	1	1	1	1	1	1	1	1	1	1	1	1	1	1	1
GO:0045185	maintenance of protein location	biological_process	1	1	1	1	1	1	1	1	1	1	1	1	1	1	1	1	1	0.00714269	1	1	1	1	1	1	1	1	1	1	1	1	1	1	1	1	1	0.0002976	0.0003648	1	1	1	1	1	1	1	1	1	1
GO:0045202	synapse	cellular_component	1	1	1	1	1	1	1	1	1	1	1	1	1	1	1	1	1	1	1	1	1	1	1	1	1	1	0.00015648	6.688e-25	3.232e-25	2.1056e-15	0.0008512	1	1	1	1	1	1	1	1	1	1	1	1	1	1	8.864e-14	1
GO:0045211	postsynaptic membrane	cellular_component	1	1	1	1	1	1	1	1	1	1	1	1	1	1	1	1	1	1	1	1	1	1	1	1	1	1	3.2e-05	8.608e-18	1.7952e-21	9.984e-13	1	1	1	1	1	1	1	1	1	1	1	1	1	1	1	3.0944e-07	1
GO:0045214	sarcomere organization	biological_process	1	1	1	1	1	1	1	1	1	1	1	1	1	1	1	1	1	1	1	1	1	1	1	1	1	1	1	1	1	1	1	1	1	1	1	1	1	1	1	1	1	1	0.00793878	0.0013792	1	1	1
GO:0045216	cell-cell junction organization	biological_process	1	1	1	1	1	1	1	1	1	1	1	1	1	1	1	1	1	1	1	1	1	1	1	1	1	1	1	1	1	1	1	1	1	1	1	1	1	1	1	1	1	0.00014016	0.00455094	0.00993696	1	1	1
GO:0045226	extracellular polysaccharide biosynthetic process	biological_process	1	1	1	1	1	1	1	1	1	1	1	1	1	1	1	1	1	1	1	1	1	1	1	1	1	1	1	1	1	1	1	1	1	1	1	1	1	1	1	1	1	1	1	1	1	1	1
GO:0045259	proton-transporting ATP synthase complex	cellular_component	1	1	5.92e-08	1	1	1	1	1	1	1	1	1	1	1	1	1	1	1	1	1	1	1	1	1	1	1	1	1	1	1	1	1	1	1	1	1	1	1	1	1	1	1	1	1	1	1	1
GO:0045261	proton-transporting ATP synthase complex	catalytic core F(1)	cellular_component	1	1	0.00031456	1	1	1	1	1	1	1	1	1	1	1	1	1	1	1	1	1	1	1	1	1	1	1	1	1	1	1	1	1	1	1	1	1	1	1	1	1	1	1	1	1	1	1
GO:0045263	proton-transporting ATP synthase complex	coupling factor F(o)	cellular_component	1	1	0.00682051	1	1	1	1	1	1	1	1	1	1	1	1	1	1	1	1	1	1	1	1	1	1	1	1	1	1	1	1	1	1	1	1	1	1	1	1	1	1	1	1	1	1	1
GO:0045333	cellular respiration	biological_process	1	1	1	1	1	1	1	1	1	1	1	1	1	1	1	1	1	1	1	1	1	1	1	1	1	1	1	1	1	1	1	1	1	1	1	1	1	1	1	1	1	1	1	1	1	1	1
GO:0045448	mitotic cell cycle	embryonic	biological_process	1	1	1	1	1	1	1	1	1	1	1	1	1	1	1	1	1	1	1	1	1	1	1	1	1	1	1	1	1	1	1	1	1	1	1	1	1	1	1	1	1	1	1	1	1	1
GO:0045454	cell redox homeostasis	biological_process	1	1	1	1	1	1	1	1	1	1	1	1	1	1	1	1	1	1	1	1	1	1	1	1	1	1	1	1	1	1	1	1	1	0.00665958	1	1	1	1	1	1	1	1	1	1	1	1	1
GO:0045495	pole plasm	cellular_component	3.68e-16	2.1728e-15	5.44e-07	1	1	1	1	1	1	1	1	1	1	1	1	1	1	1	1	1	1	1	1	1	1	1	1	1	1	1	1	1	1.5968e-20	6.336e-17	1	0.00795123	1	1	1	2.6304e-06	1	1	1	1	1	1	1
GO:0045595	regulation of cell differentiation	biological_process	1	1	1	1	1	1	1	1	1	1	1	1	1	1	1	1	1	1	1	1	1	1	1	1	1	1	1	1	1	1	1	1	1	1	1	1	1	1	1	1	1	8.8e-08	1	1	1	1	1
GO:0045664	regulation of neuron differentiation	biological_process	1	1	1	1	1	1	1	1	1	1	1	1	1	1	1	1	1	1	1	1	1	1	1	1	0.00874794	1	1	1	1	1	1	1	1	1	1	1	1	1	1	1	1	0.001408	1	0.0020512	1	1	1
GO:0045727	positive regulation of translation	biological_process	1	1	1	1	1	1	1	1	1	1	1	1	1	1	1	1	1	1	1	1	1	1	1	1	1	1	1	1	1	1	1	1	1	1	1	1	1	1	1	1	1	1	1	1	1	1	1
GO:0045746	negative regulation of Notch signaling pathway	biological_process	1	1	1	1	1	1	1	1	1	1	1	1	1	1	1	1	1	1	1	1	1	1	1	1	1	1	1	1	1	1	1	1	1	1	1	1	1	1	1	1	1	1	1	1	1	1	1
GO:0045747	positive regulation of Notch signaling pathway	biological_process	1	1	1	1	1	1	1	1	1	1	1	1	1	1	1	1	1	1	1	1	1	1	1	1	1	1	1	1	1	1	1	1	1	1	1	1	1	1	1	1	1	1	1	1	1	1	1
GO:0045786	negative regulation of cell cycle	biological_process	1	1	1	1	1	1	1	1	1	1	1	1	1	1	1	1	1	1	1	1	1	1	1	1	1	1	1	1	1	1	1	1	1	1	1	2.7584e-07	0.0003872	1	1	1	1	1	1	1	1	1	1
GO:0045787	positive regulation of cell cycle	biological_process	1	1	1	1	1	1	1	1	1	1	1	1	1	1	1	1	1	1	1	1	1	1	1	1	1	1	1	1	1	1	1	1	1	1	1	1	1	1	1	1	1	1	1	1	1	1	1
GO:0045793	positive regulation of cell size	biological_process	1	1	1	1	1	1	1	1	1	1	1	1	1	1	1	1	1	1	1	1	1	1	1	1	1	1	1	1	1	1	1	1	1	1	1	1	1	1	1	1	1	0.000592	1	1	1	1	1
GO:0045814	negative regulation of gene expression	epigenetic	biological_process	1	1	1	1	1	1	1	1	1	1	1	1	1	1	1	1	1	1	1	1	1	1	1	1	1	1	1	1	1	1	1	1	1	1	1	1	1	1	1	1	1	1	1	1	1	1
GO:0045836	positive regulation of meiotic nuclear division	biological_process	1	1	1	1	1	1	1	1	1	1	1	1	1	1	1	1	1	1	1	1	1	1	1	1	1	1	1	1	1	1	1	1	1	1	1	1	1	1	1	1	1	1	1	1	1	1	1
GO:0045859	regulation of protein kinase activity	biological_process	1	1	1	1	1	1	1	1	1	1	1	1	1	1	1	1	1	1	1	1	1	1	1	1	1	1	1	1	1	1	1	1	1	1	1	1	1	1	1	1	1	1	1	1	1	1	1
GO:0045860	positive regulation of protein kinase activity	biological_process	1	1	1	1	1	1	1	1	1	1	1	1	1	1	1	1	1	1	1	1	1	1	1	1	1	1	1	1	1	1	1	1	1	1	1	1	1	1	1	1	1	1	1	1	1	1	1
GO:0045892	negative regulation of transcription	DNA-templated	biological_process	1	1	1	1	1	1	1	1	1	1	1	1	1	1	1	1	1	1	1	1	1	1	1	1	1	1	1	1	1	1	1	1	1	1	1	0.00342413	1	1	1	1	1	1	1	1	1	1
GO:0045893	positive regulation of transcription	DNA-templated	biological_process	1	1	1	1	1	1	1	1	1	0.0015904	1	1	1	1	1	1	1	0.00021152	1	1	0.00463443	1	1	0.00640294	1	1	1	1	1	1	1	0.0004352	1	1	1	1	1	1	1	1	1	0.0008544	1	1	1	1
GO:0045926	negative regulation of growth	biological_process	1	1	1	1	1	1	1	1	1	1	1	1	1	1	1	1	1	1	1	1	1	1	1	1	1	1	1	1	1	1	1	1	1	1	1	1	1	1	1	1	1	1	1	1	1	1	1
GO:0045927	positive regulation of growth	biological_process	5.792e-08	1.2992e-15	2.5696e-08	1	1	1	1.936e-09	0.00013376	1	7.072e-08	1	1	1	1	0.0003232	1	1	8.768e-11	7.424e-08	1	1	1	1	1	1	1	1	1	1	1	1	0.0004416	2.1088e-06	1	0.00471446	2.384e-07	2.7616e-09	5.056e-07	1.1808e-16	1	1.1488e-07	1.2768e-06	0.00010368	1	1	1	1
GO:0045933	positive regulation of muscle contraction	biological_process	1	1	1	1	1	1	1	1	1	1	1	1	1	1	1	1	1	1	1	1	1	1	1	1	1	1	1	1	1	1	1	1	1	1	1	1	1	1	1	1	1	1	1	1	1	1	1
GO:0045934	negative regulation of nucleobase-containing compound metabolic process	biological_process	1	1	1	1	1	1	1	1	1	1	1	1	1	1	1	1	1	1	1	1	1	1	1	1	1	1	1	1	1	1	1	1	1	1	1	3.648e-06	0.00684877	1	1	1	1	1	1	1	1	1	1
GO:0045935	positive regulation of nucleobase-containing compound metabolic process	biological_process	1	1	1	1	1	1	1	1	1	0.0028928	1	1	1	1	1	1	1	0.0006528	1	1	1	1	1	1	1	1	1	1	1	1	1	0.0014208	1	1	1	1	1	1	1	1	1	0.0023488	1	1	1	1	1
GO:0045944	positive regulation of transcription from RNA polymerase II promoter	biological_process	1	1	1	1	1	1	1	1	1	1	1	1	1	1	1	1	1	0.00010272	1	1	1	1	1	0.0042152	1	1	1	1	1	1	1	0.0002032	1	1	1	1	1	1	1	1	0.00603936	0.000448	1	1	1	1	1
GO:0045995	regulation of embryonic development	biological_process	1	1	1	1	1	1	1	1	1	1	1	1	1	1	1	1	1	1	1	1	1	1	1	1	1	1	1	1	1	1	1	1	1	1	1	1	1	1	1	1	1	1	1	1	1	1	1
GO:0046034	ATP metabolic process	biological_process	1	1	1	1	1	1	1	1	1	1	1	1	1	1	1	1	1	1	1	1	1	1	1	1	1	1	1	1	1	1	0.00022848	1	1	1	1	1	1	1	1	1	1	1	1	1	1	1	1
GO:0046039	GTP metabolic process	biological_process	1	1	1	1	1	1	1	1	1	1	1	1	1	1	1	1	1	1	1	1	1	1	1	1	1	1	1	1	1	1	1	1	1	1	1	1	1	1	1	1	1	1	1	1	1	1	1
GO:0046068	cGMP metabolic process	biological_process	1	1	1	1	1	1	1	1	1	1	1	1	1	1	1	1	1	1	1	1	1	1	1	1	1	1	1	3.456e-07	1	1	1	1	1	1	1	1	1	1	1	1	1	1	1	1	1	1	1
GO:0046112	nucleobase biosynthetic process	biological_process	1	1	1	1	1	1	1	1	1	1	1	1	1	1	1	1	1	1	1	1	1	1	1	1	1	1	1	1	1	1	1	1	1	1	1	1	1	1	1	1	1	1	1	1	1	1	1
GO:0046125	pyrimidine deoxyribonucleoside metabolic process	biological_process	1	1	1	1	1	1	1	1	1	1	1	1	1	1	1	1	1	1	1	1	1	1	1	1	1	1	1	1	1	1	1	1	1	1	1	1	1	1	1	1	1	1	1	1	1	1	1
GO:0046128	purine ribonucleoside metabolic process	biological_process	1	1	1	1	1	1	1	1	1	1	1	1	1	1	1	1	1	1	1	1	1	1	1	1	1	1	1	1	1	1	1	1	1	1	1	1	1	1	1	1	1	1	1	1	1	1	1
GO:0046131	pyrimidine ribonucleoside metabolic process	biological_process	1	1	1	1	1	1	1	1	1	1	1	1	1	1	1	1	1	1	1	1	1	1	1	1	1	1	1	1	1	1	1	1	1	1	1	1	1	1	1	1	1	1	1	1	1	1	1
GO:0046148	pigment biosynthetic process	biological_process	1	1	1	1	1	1	1	1	1	1	1	1	1	1	1	1	1	1	1	1	1	1	1	1	1	1	1	1	1	1	1	1	1	1	1	1	1	1	1	1	1	1	1	1	1	1	1
GO:0046164	alcohol catabolic process	biological_process	0.0003232	1	1	1	1	1	1	1	1	1	1	1	1	1	1	1	1	1	1	1	1	1	1	1	1	1	1	1	1	1	1	1	1	1	1	1	1	1	1	1	1	1	1	1	1	1	1
GO:0046165	alcohol biosynthetic process	biological_process	1	1	1	1	1	1	1	1	1	1	1	1	1	1	1	1	1	1	1	1	1	1	1	1	1	1	1	1	1	1	1	1	1	1	1	1	1	1	1	1	1	1	1	1	1	1	1
GO:0046168	glycerol-3-phosphate catabolic process	biological_process	1	1	1	1	1	1	1	1	1	1	1	1	1	1	1	1	1	1	1	1	1	1	1	1	1	1	1	1	1	1	1	1	1	1	1	1	1	1	1	1	1	1	1	1	1	1	1
GO:0046174	polyol catabolic process	biological_process	1	1	1	1	1	1	1	1	1	1	1	1	1	1	1	1	1	1	1	1	1	1	1	1	1	1	1	1	1	1	1	1	1	1	1	1	1	1	1	1	1	1	1	1	1	1	1
GO:0046356	acetyl-CoA catabolic process	biological_process	0.0011968	1.2896e-05	1	1	1	1	1	1	1	1	1	1	1	1	1	1	1	1	1	1	1	1	1	1	1	1	1	1	1	1	1	1	1	1	1	1	1	1	1	1	1	1	1	1	1	1	1
GO:0046364	monosaccharide biosynthetic process	biological_process	1	1	1	1	1	1	1	1	1	1	1	1	1	1	1	1	1	1	1	1	1	1	1	1	1	1	1	1	1	1	1	1	1	1	1	1	1	1	1	1	1	1	1	1	1	1	1
GO:0046365	monosaccharide catabolic process	biological_process	0.00017184	1	1	1	1	1	1	1	1	1	1	1	1	1	1	1	1	1	1	1	1	1	1	1	1	1	1	1	1	1	1	1	1	1	1	1	1	1	1	1	1	1	1	1	1	1	1
GO:0046379	extracellular polysaccharide metabolic process	biological_process	1	1	1	1	1	1	1	1	1	1	1	1	1	1	1	1	1	1	1	1	1	1	1	1	1	1	1	1	1	1	1	1	1	1	1	1	1	1	1	1	1	1	1	1	1	1	1
GO:0046394	carboxylic acid biosynthetic process	biological_process	1	1	1	1	1	1	1	1	1	1	1	1	1	1	1	1	1	1	1	1	1	1	1	1	1	1	1	1	1	1	1	1	1	1	1	1	1	1	1	1	1	1	1	1	1	1	1
GO:0046395	carboxylic acid catabolic process	biological_process	1	1	1	1	1	1	1	1	1	1	1	1	1	1	1	1	1	1	1	1	1	1	1	1	1	1	1	1	1	1	1	1	1	1	1	1	1	1	1	1	1	1	1	1	1	1	1
GO:0046466	membrane lipid catabolic process	biological_process	1	1	1	1	1	1	1	1	1	1	1	1	1	1	1	1	1	1	1	1	1	1	1	1	1	1	1	1	1	1	1	1	1	1	1	1	1	1	1	1	1	1	1	1	1	1	1
GO:0046467	membrane lipid biosynthetic process	biological_process	1	1	1	1	1	1	1	1	1	1	1	1	1	1	1	1	1	1	1	1	1	1	1	1	1	1	1	1	1	1	1	1	1	1	1	1	1	1	1	1	1	1	1	1	1	1	1
GO:0046474	glycerophospholipid biosynthetic process	biological_process	1	1	1	1	1	1	1	1	1	1	1	1	1	1	1	1	1	1	1	1	1	1	1	1	1	1	1	1	1	1	1	1	1	1	1	1	1	1	1	1	1	1	1	1	1	1	1
GO:0046483	heterocycle metabolic process	biological_process	1	1	1	1	1	1	1	1	1	1	1	1	1	1	1	1	1	1	1	1	1	1	1	1	1	1	1	5.184e-05	1	1	1	1	1	1	1	1	1	1	1	1	1	1	1	1	1	1	1
GO:0046486	glycerolipid metabolic process	biological_process	1	0.00446006	1	1	1	1	1	1	1	1	1	1	1	1	1	1	1	1	1	1	1	1	1	1	1	1	1	1	1	1	1	1	0.0011264	1	1	1	1	1	1	1	1	1	1	1	1	1	1
GO:0046488	phosphatidylinositol metabolic process	biological_process	1	1	1	1	1	1	1	1	1	1	1	1	1	1	1	1	1	1	1	1	1	1	1	1	1	1	1	1	1	1	1	1	1	1	1	1	1	1	1	1	1	1	1	1	1	1	1
GO:0046496	nicotinamide nucleotide metabolic process	biological_process	1	1	1	1	1	1	1	1	1	1	1	1	1	1	1	1	1	1	1	1	1	1	1	1	1	1	1	1	1	1	1	1	1	1	1	1	1	1	1	1	1	1	1	1	1	1	1
GO:0046513	ceramide biosynthetic process	biological_process	1	1	1	1	1	1	1	1	1	1	1	1	1	1	1	1	1	1	1	1	1	1	1	1	1	1	1	1	1	1	1	1	1	1	1	1	1	1	1	1	1	1	1	1	1	1	1
GO:0046519	sphingoid metabolic process	biological_process	1	1	1	1	1	1	1	1	1	1	1	1	1	1	1	1	1	1	1	1	1	1	1	1	1	1	1	1	1	1	1	1	1	1	1	1	1	1	1	1	1	1	1	1	1	1	1
GO:0046520	sphingoid biosynthetic process	biological_process	1	1	1	1	1	1	1	1	1	1	1	1	1	1	1	1	1	1	1	1	1	1	1	1	1	1	1	1	1	1	1	1	1	1	1	1	1	1	1	1	1	1	1	1	1	1	1
GO:0046536	dosage compensation complex	cellular_component	1	1	1	1	1	1	1	1	1	1	1	1	1	1	1	1	1	1	1	1	1	1	1	1	1	1	1	1	1	1	1	1	1	1	1	1	1	1	1	1	1	1	1	1	1	1	1
GO:0046546	development of primary male sexual characteristics	biological_process	1	1	1	1	1	1	1	1	1	1	1	1	1	1	1	1	1	1	1	1	1	1	1	1	1	1	1	1	1	1	1	1	1	1	1	1	1	1	1	1	1	1	1	1	1	1	1
GO:0046578	regulation of Ras protein signal transduction	biological_process	1	1	1	1	1	1	1	1	1	1	1	1	1	1	1	1	1	1	1	1	1	1	1	1	1	1	1	1	1	1	1	1	1	1	1	1	1	1	1	1	1	1	1	1	1	1	1
GO:0046579	positive regulation of Ras protein signal transduction	biological_process	1	1	1	1	1	1	1	1	1	1	1	1	1	1	1	1	1	1	1	1	1	1	1	1	1	1	1	1	1	1	1	1	1	1	1	1	1	1	1	1	1	1	1	1	1	1	1
GO:0046580	negative regulation of Ras protein signal transduction	biological_process	1	1	1	1	1	1	1	1	1	1	1	1	1	1	1	1	1	1	1	1	1	1	1	1	1	1	1	1	1	1	1	0.00983568	1	1	1	1	1	1	1	1	1	1	1	1	1	1	1
GO:0046620	regulation of organ growth	biological_process	1	1	1	1	1	1	1	1	1	1	1	1	1	1	1	1	1	1	1	1	1	1	1	1	1	1	1	1	1	1	1	1	1	1	1	1	1	1	1	1	1	1	1	1	1	1	1
GO:0046626	regulation of insulin receptor signaling pathway	biological_process	1	1	1	1	1	1	1	1	1	1	1	1	1	1	1	1	1	1	1	1	1	1	1	1	1	1	1	1	1	1	1	1	1	1	1	1	1	1	1	1	1	1	1	1	1	1	1
GO:0046661	male sex differentiation	biological_process	1	1	1	1	1	1	1	1	1	1	1	1	1	1	1	1	1	1	1	1	1	1	1	1	1	1	1	1	1	1	1	1	1	1	1	1	1	1	1	1	1	1	1	1	1	1	1
GO:0046662	regulation of oviposition	biological_process	1	1	1	1	1	1	1	1	1	1	1	1	1	1	1	1	1	1	1	1	1	1	1	1	1	1	1	1	1	1	1	1	1	1	1	1	1	1	1	1	1	1	1	1	1	1	1
GO:0046686	response to cadmium ion	biological_process	1	1	1	1	1	1	1	1	1	1	1	1	1	1	1	1	1	1	1	1	1	1	1	1	1	1	1	1	1	1	1	1	1	1	1	1	1	1	1	1	1	1	1	1	1	1	1
GO:0046688	response to copper ion	biological_process	1	1	1	1	1	1	1	1	1	1	1	1	1	1	1	1	1	1	1	1	1	1	1	1	1	1	1	1	1	1	1	1	1	1	1	1	1	1	1	1	1	1	1	1	1	1	1
GO:0046700	heterocycle catabolic process	biological_process	1	1	1	1	1	1	1	1	1	1	1	1	1	1	1	1	1	1	1	1	1	1	1	1	1	1	1	1	1	1	1	1	1	1	1	1	1	1	1	1	1	1	1	1	1	1	1
GO:0046716	muscle cell cellular homeostasis	biological_process	1	1	1	1	1	1	1	1	1	1	1	1	1	1	1	1	1	1	1	1	1	1	1	1	1	1	1	1	1	1	1	1	1	1	1	1	1	1	1	1	1	1	1	1	1	1	1
GO:0046777	protein autophosphorylation	biological_process	1	1	1	1	1	1	1	1	1	1	1	1	1	1	1	1	1	1	1	1	1	1	1	1	1	1	1	1	1	1	1	1	1	1	1	1	1	1	1	1	1	1	1	1	1	1	1
GO:0046785	microtubule polymerization	biological_process	1	1	1	1	1	1	1	1	1	1	1	1	1	1	1	1	1	1	1	1	1	1	1	1	1	1	1	1	1	1	1	1	1	1	1	1	1	1	1	1	1	1	1	1	1	1	1
GO:0046834	lipid phosphorylation	biological_process	1	1	1	1	1	1	1	1	1	1	1	1	1	1	1	1	1	1	1	1	1	1	1	1	1	1	1	1	1	1	1	1	1	1	1	1	1	1	1	1	1	1	1	1	1	1	1
GO:0046854	phosphatidylinositol phosphorylation	biological_process	1	1	1	1	1	1	1	1	1	1	1	1	1	1	1	1	1	1	1	1	1	1	1	1	1	1	1	1	1	1	1	1	1	1	1	1	1	1	1	1	1	1	1	1	1	1	1
GO:0046872	metal ion binding	molecular_function	1	1	1	1	1	1	1	1	1	1	0.00593856	1	1	1	4.736e-06	1	1	1	1	1	1	5.76e-05	0.0004096	5.888e-05	1	1	1	1	1	1	1	1	1	1	1	1	1	1	7.904e-05	1	1	1.8496e-06	1.6544e-07	9.824e-05	1	1	1
GO:0046873	metal ion transmembrane transporter activity	molecular_function	1	1	1	1	1	1	1	1	1	1	1	1	1	1	1	1	1	1	1	1	1	1	1	1	1	1	1	1	1	1	1	1	1	1	1	1	1	1	1	1	1	1	1	1	1	1	1
GO:0046903	secretion	biological_process	1	1	1	1	1	1	1	1	1	1	1	1	1	1	1	1	1	1	1	1	1	1	1	1	1	1	1	1	1	1	1	1	1	1	1	1	1	1	1	1	1	0.002384	1	1	1	1	1
GO:0046906	tetrapyrrole binding	molecular_function	1	1	1	1	1	1	1	1	1	1	1	1	1	1	1	1	1	1	1	1	1	1	1	1	1	1	1	1	0.0021568	2.1216e-06	1	1	1	1	1	1	1	1	1	1	1	1	1	1	1	1	1
GO:0046907	intracellular transport	biological_process	2.4064e-05	4.736e-05	1	1	1	1	1	1	1	1	1	1	1	1	1	1	1	1	1	1	1	1	1	1	1	1	1	1	1	1	1	1	1	1	1	1	1	1	1	1	1	1	1	1	1	1	1
GO:0046912	transferase activity	transferring acyl groups	acyl groups converted into alkyl on transfer	molecular_function	1	1	1	1	1	1	1	1	1	1	1	1	1	1	1	1	1	1	1	1	1	1	1	1	1	1	1	1	1	1	1	1	1	1	1	1	1	1	1	1	1	1	1	1	1
GO:0046914	transition metal ion binding	molecular_function	1	1	1	1	1	1	1	1	1	1	1	1	1	1	1	1	1	1	1	1	1	1	1	1	1	1	1	1	1	1	1	1	1	1	1	1	1	1	1	1	1	0.00358938	1	1	1	1	1
GO:0046915	transition metal ion transmembrane transporter activity	molecular_function	1	1	1	1	1	1	1	1	1	1	1	1	1	1	1	1	1	1	1	1	1	1	1	1	1	1	1	1	1	1	1	1	1	1	1	1	1	1	1	1	1	1	1	1	1	1	1
GO:0046928	regulation of neurotransmitter secretion	biological_process	1	1	1	1	1	1	1	1	1	1	1	1	1	1	1	1	1	1	1	1	1	1	1	1	1	1	1	1	1	1	1	1	1	1	1	1	1	1	1	1	1	1	1	1	1	1	1
GO:0046930	pore complex	cellular_component	1	1	1	1	1	1	1	1	1	1	1	1	1	1	1	1	1	1	1	1	1	1	1	1	1	1	1	1	1	1	1	1	1	1	1	1	1	1	1	1	1	1	1	1	1	1	1
GO:0046933	proton-transporting ATP synthase activity	rotational mechanism	molecular_function	1	1	1	1	1	1	1	1	1	1	1	1	1	1	1	1	1	1	1	1	1	1	1	1	1	1	1	1	1	1	1	1	1	1	1	1	1	1	1	1	1	1	1	1	1	1
GO:0046942	carboxylic acid transport	biological_process	1	1	1	1	1	1	1	1	1	1	1	1	1	1	1	1	1	1	1	1	1	1	1	1	1	1	1	1	3.616e-05	0.00030208	1	1	1	1	1	1	1	1	1	1	1	1	1	1	1	1	1
GO:0046943	carboxylic acid transmembrane transporter activity	molecular_function	1	1	1	1	1	1	1	1	1	1	1	1	1	1	1	1	1	1	1	1	1	1	1	1	1	1	1	1	0.00024992	0.0017728	1	1	1	1	1	1	1	1	1	1	1	1	1	1	1	1	1
GO:0046961	proton-transporting ATPase activity	rotational mechanism	molecular_function	1	1	1	1	1	1	1	1	1	1	1	1	1	1	1	1	1	1	1	1	1	1	1	1	1	1	1	1	1	1	1	1	1	1	1	1	1	1	1	1	1	1	1	1	1	1
GO:0046982	protein heterodimerization activity	molecular_function	1	1	1	1	1	1	1	1	1	1	1	1	1	1	1	1	1	1	1	1	1	1	1	1	1	1	1	1	1	1	1	1	1	1	1	1	1	0.00998051	1	1	1	1	1	1	1	1	1
GO:0046983	protein dimerization activity	molecular_function	1	1	1	1	1	1	0.00924925	1	1	1	1	1	1	1	1	1	1	1	1	1	0.00952198	1	1	1	1	1	1	1	1	1	1	1	1	1	1	1	1	1	1	1	1	1	1	1	1	1	1
GO:0048015	phosphatidylinositol-mediated signaling	biological_process	1	1	1	1	1	1	1	1	1	1	1	1	1	1	1	1	1	1	1	1	1	1	1	1	1	1	1	1	1	1	1	1	1	1	1	1	1	1	1	1	1	1	1	1	1	1	1
GO:0048017	inositol lipid-mediated signaling	biological_process	1	1	1	1	1	1	1	1	1	1	1	1	1	1	1	1	1	1	1	1	1	1	1	1	1	1	1	1	1	1	1	1	1	1	1	1	1	1	1	1	1	1	1	1	1	1	1
GO:0048037	cofactor binding	molecular_function	1	1	1	1	1	1	1	1	1	1	1	1	1	1	1	1	1	1	1	1	1	1	1	1	1	1	1	1	1	1	1	0.00032	1	1	1	1	1	1	1	1	1	1	1	1	1	1	1
GO:0048193	Golgi vesicle transport	biological_process	1	1	1	1	1	1	1	1	1	1	1	1	1	1	1	1	1	1	1	1	1	1	1	1	1	1	1	1	1	1	1	1	1	1	1	1	1	1	1	1	1	1	1	1	1	1	1
GO:0048232	male gamete generation	biological_process	0.0006528	1	1	1	1	1	1	1	1	1	1	1	1	1	1	1	1	1	1	1	1	1	1	1	1	1	1	1	1	1	1	1	0.00012928	1	1	1	1	1	1	1	1	1	1	1	1	1	1
GO:0048278	vesicle docking	biological_process	1	1	1	1	1	1	1	1	1	1	1	1	1	1	1	1	1	1	1	1	1	1	1	1	1	1	1	1	1	1	1	1	1	1	1	1	1	1	1	1	1	1	1	1	1	1	1
GO:0048284	organelle fusion	biological_process	1	1	1	1	1	1	1	1	1	1	1	1	1	1	1	1	1	1	1	1	1	1	1	1	1	1	1	1	1	1	1	1	1	1	1	1	1	1	1	1	1	1	1	1	1	1	1
GO:0048285	organelle fission	biological_process	1	1	0.0017728	1	1	6.976e-06	6.08e-07	1	1	1	1	1	1	1	1	1	1	1	1	1	1	1	1	1	1	1	1	1	1	1	1	1	1	1	1	2.5568e-11	1.2736e-18	1.6576e-07	0.00564477	1	1	1	1	1	1	1	1
GO:0048332	mesoderm morphogenesis	biological_process	1	1	1	1	1	1	1	1	1	1	1	1	1	1	1	1	1	1	0.00012224	1	1	1	1	1	1	1	1	1	1	1	1	1	1	1	1	1	1	1	1	0.00777194	1	3.904e-07	1	1	1	1	1
GO:0048333	mesodermal cell differentiation	biological_process	1	1	1	1	1	1	1	1	1	1	1	1	1	1	1	1	1	1	1	1	1	1	1	1	1	1	1	1	1	1	1	1	1	1	1	1	1	1	1	1	1	1	1	1	1	1	1
GO:0048468	cell development	biological_process	1	1	1	1	1	1	1	1	1	1	1	1	1	1	0.00022176	1	1	0.0003904	1	1	1	0.0042792	1	1	1	1	1	1	1	1	1	1	1	1	1	0.00441251	1	1	2.208e-07	0.0022528	1	1.0208e-10	1.5936e-07	0.0003232	1	1	1
GO:0048469	cell maturation	biological_process	1	1	1	1	1	1	1	1	1	1	1	1	1	1	1	1	1	1	1	1	1	1	1	1	1	1	1	1	1	1	1	1	1	1	1	1	0.0029408	1	1	1	1	1	1	1	1	1	1
GO:0048471	perinuclear region of cytoplasm	cellular_component	0.00697437	1	1	1	1	1	1	1	1	1	1	1	1	1	1	1	1	1	1	1	1	1	1	1	1	1	1	1	1	1	1	1	1	1	1	1	1	1	1	1	1	1	1	1	1	1	1
GO:0048475	coated membrane	cellular_component	1	1	1	1	1	1	1	1	1	1	1	1	1	1	1	1	1	1	1	1	1	1	1	1	1	1	1	1	1	1	1	1	1	1	1	1	1	1	1	1	1	1	1	1	1	1	1
GO:0048477	oogenesis	biological_process	3.264e-07	4.864e-07	1	1	1	1	1	1	1	1	1	1	1	1	1	1	1	1	1	1	1	1	1	1	1	1	1	1	1	1	1	1	8.704e-07	0.0018336	1	1	1	1	1	1	1	1	1	1	1	1	1
GO:0048489	synaptic vesicle transport	biological_process	1	1	1	1	1	1	1	1	1	1	1	1	1	1	1	1	1	1	1	1	1	1	1	1	1	1	1	1	1	1	1	1	1	1	1	1	1	1	1	1	1	1	1	1	1	1	1
GO:0048500	signal recognition particle	cellular_component	1	1	1	1	1	1	1	1	1	1	1	1	1	1	1	1	1	1	1	1	1	1	1	1	1	1	1	1	1	1	1	1	1	1	1	1	1	1	1	1	1	1	1	1	1	1	1
[truncated: 322 more rows]
[truncated: 32 more columns]
