# Supplementary material for: The time-resolved transcriptome of C. elegans
Source: Genome Res. 2016 Oct;26(10):1441–50. doi: 10.1101/gr.202663.115 (PMC5052054; doi:10.1101/gr.202663.115)
Supplement: Supplemental Material [file supp_gr.202663.115_Supplemental_Table_S6.xlsx]

## Sheet: Cluster1
term_ID	description	log10 p-value
GO:0007186	G-protein coupled receptor signaling pathway	-10.7145
GO:0023052	signaling	-20.8029
GO:0015672	monovalent inorganic cation transport	-10.04
GO:0006813	potassium ion transport	-7.5278
GO:0030001	metal ion transport	-8.8644
GO:0006812	cation transport	-8.1982
GO:0007165	signal transduction	-14.4535
GO:0006811	ion transport	-29.3017
GO:0007166	cell surface receptor signaling pathway	-9.7299
GO:0005575	cellular_component	-5.9027
GO:0016020	membrane	-18.0063
GO:0016021	integral component of membrane	-16.6424
GO:0044456	synapse part	-20.5435
GO:0045211	postsynaptic membrane	-17.0651
GO:0045202	synapse	-24.1747
GO:0044425	membrane part	-16.6262
GO:0031224	intrinsic component of membrane	-16.4695
GO:0003824	catalytic activity	0
GO:0004930	G-protein coupled receptor activity	-7.2853
GO:0005215	transporter activity	-23.1057
GO:0005216	ion channel activity	-38.4193
GO:0022857	transmembrane transporter activity	-29.6424
GO:0022891	substrate-specific transmembrane transporter activity	-30.5435
GO:0022892	substrate-specific transporter activity	-28.355
GO:0015075	ion transmembrane transporter activity	-30.975
GO:0005230	extracellular ligand-gated ion channel activity	-21.6393
GO:0015276	ligand-gated ion channel activity	-23.7307
GO:0005261	cation channel activity	-21.0446
GO:0005267	potassium channel activity	-6.9608
GO:0022836	gated channel activity	-23.2324
GO:0022803	passive transmembrane transporter activity	-37.9816
GO:0022834	ligand-gated channel activity	-23.7307
GO:0022838	substrate-specific channel activity	-38.2935
GO:0008324	cation transmembrane transporter activity	-13.7593
GO:0015267	channel activity	-37.9816

## Sheet: Cluster2
term_ID	description	log10 p-value
GO:0000279	M phase	-16.2827
GO:0016192	vesicle-mediated transport	-18.8311
GO:0019953	sexual reproduction	-8.9483
GO:0022403	cell cycle phase	-15.7941
GO:0033554	cellular response to stress	-21.6623
GO:0048519	negative regulation of biological process	-12.299
GO:0051327	meiotic M phase	-14.6327
GO:0061024	membrane organization	-20.2543
GO:0080090	regulation of primary metabolic process	0
GO:0006259	DNA metabolic process	-19.2396
GO:0022402	cell cycle process	-21.6623
GO:0051321	meiotic cell cycle	-15.1584
GO:0000278	mitotic cell cycle	-5.031
GO:0007126	meiotic nuclear division	-14.23
GO:0000910	cytokinesis	-10.2853
GO:0045132	meiotic chromosome segregation	-14.2907
GO:0007568	aging	-11.1768
GO:0009056	catabolic process	-8.7633
GO:0007059	chromosome segregation	-13.0265
GO:0051301	cell division	-14.3876
GO:0007049	cell cycle	-23.0221
GO:0030163	protein catabolic process	-12.7039
GO:0044257	cellular protein catabolic process	-10.1665
GO:0051603	proteolysis involved in cellular protein catabolic process	-10.3487
GO:0044265	cellular macromolecule catabolic process	-11.3979
GO:0006897	endocytosis	-20.0952
GO:0051716	cellular response to stimulus	-22.5858
GO:0010324	membrane invagination	-20.0952
GO:0044248	cellular catabolic process	-10.9083
GO:0006281	DNA repair	-19.299
GO:0006974	cellular response to DNA damage stimulus	-18.7262
GO:0006898	receptor-mediated endocytosis	-18.9349
GO:0043186	P granule	-14.663
GO:0060293	germ plasm	-14.663
GO:0005737	cytoplasm	-30.3645
GO:0045495	pole plasm	-14.663
GO:0044444	cytoplasmic part	-17.1238
GO:0000502	proteasome complex	-14.4614
GO:0005839	proteasome core complex	-10.6535
GO:0043234	protein complex	-9.3487
GO:0003723	RNA binding	-12.482
GO:0003824	catalytic activity	-18.8182
GO:0004298	threonine-type endopeptidase activity	-10.6535
GO:0000166	nucleotide binding	-13.7474
GO:0070003	threonine-type peptidase activity	-10.6535

## Sheet: Cluster3
term_ID	description	log10 p-value
GO:0006355	regulation of transcription, DNA-templated	-5.5816
GO:0010468	regulation of gene expression	-6.1427
GO:0019219	regulation of nucleobase-containing compound metabolic process	-4.6436
GO:0032774	RNA biosynthetic process	-4.2138
GO:0031326	regulation of cellular biosynthetic process	-5.2853
GO:0051252	regulation of RNA metabolic process	-4.207
GO:0006351	transcription, DNA-templated	-3.9197
GO:0010556	regulation of macromolecule biosynthetic process	-5.3613
GO:2000112	regulation of cellular macromolecule biosynthetic process	-5.3613
GO:0023060	signal transmission	0
GO:0019222	regulation of metabolic process	-4.6175
GO:0009889	regulation of biosynthetic process	-5.267
GO:0051171	regulation of nitrogen compound metabolic process	-4.6436
GO:0031323	regulation of cellular metabolic process	-4.0091
GO:0080090	regulation of primary metabolic process	-4.3102
GO:0001071	nucleic acid binding transcription factor activity	-3.3809
GO:0003700	sequence-specific DNA binding transcription factor activity	-3.3809
GO:0030528	transcription regulator activity	0
GO:0043565	sequence-specific DNA binding	0

## Sheet: Cluster4
term_ID	description	log10 p-value
GO:0051276	chromosome organization	-18.2721
GO:0071103	DNA conformation change	-14.4778
GO:0030154	cell differentiation	-2.1157
GO:0010467	gene expression	-2.1579
GO:0006139	nucleobase-containing compound metabolic process	-6.8634
GO:0065004	protein-DNA complex assembly	-14.2907
GO:0034728	nucleosome organization	-13.7959
GO:0006334	nucleosome assembly	-13.7959
GO:0031497	chromatin assembly	-13.6853
GO:0071824	protein-DNA complex subunit organization	-14.2907
GO:0043933	macromolecular complex subunit organization	-10.9049
GO:0006325	chromatin organization	-15.7138
GO:0044085	cellular component biogenesis	-9.242
GO:0022607	cellular component assembly	-10.0077
GO:0065003	macromolecular complex assembly	-9.9016
GO:0034622	cellular macromolecular complex assembly	-10.1039
GO:0006323	DNA packaging	-15.3395
GO:0090304	nucleic acid metabolic process	-7.5112
GO:0006333	chromatin assembly or disassembly	-14.8895
GO:0005694	chromosome	-22.0221
GO:0032993	protein-DNA complex	-14.8534
GO:0005634	nucleus	-21.9911
GO:0044427	chromosomal part	-19.6204
GO:0000786	nucleosome	-14.8534
GO:0000785	chromatin	-14.656
GO:0003677	DNA binding	-5.2518

## Sheet: Cluster5
term_ID	description	log10 p-value
GO:0000003	reproduction	-51.82
GO:0008150	biological_process	-69.9938
GO:0008152	metabolic process	-20.2396
GO:0009790	embryo development	-112.884
GO:0009987	cellular process	-47.8274
GO:0016070	RNA metabolic process	0
GO:0022414	reproductive process	-16.3487
GO:0032501	multicellular organismal process	-86.0799
GO:0032502	developmental process	-104.124
GO:0040007	growth	-26.929
GO:0040008	regulation of growth	-16.4695
GO:0040009	regulation of growth rate	-15.4304
GO:0040010	positive regulation of growth rate	-15.2207
GO:0045927	positive regulation of growth	-14.8863
GO:0040011	locomotion	-3.8118
GO:0044237	cellular metabolic process	-23.2518
GO:0065007	biological regulation	-17.09
GO:0071840	cellular component organization or biogenesis	-6.6623
GO:0006996	organelle organization	-9.8624
GO:0016043	cellular component organization	-7.0603
GO:0006807	nitrogen compound metabolic process	-8.3426
GO:0044260	cellular macromolecule metabolic process	-14.5167
GO:0044238	primary metabolic process	-13.1128
GO:0051239	regulation of multicellular organismal process	-5.1505
GO:0043170	macromolecule metabolic process	-12.423
GO:0050789	regulation of biological process	-17.7689
GO:0060255	regulation of macromolecule metabolic process	0
GO:0010467	gene expression	0
GO:0048518	positive regulation of biological process	-16.3581
GO:0034641	cellular nitrogen compound metabolic process	-9.267
GO:0032504	multicellular organism reproduction	-4.6011
GO:0010171	body morphogenesis	-3.9777
GO:0003006	developmental process involved in reproduction	-13.7004
GO:0007548	sex differentiation	-8.3743
GO:0060429	epithelium development	-6.9777
GO:0048729	tissue morphogenesis	-6.3809
GO:0002009	morphogenesis of an epithelium	-7.4418
GO:0009888	tissue development	-6.6649
GO:0002119	nematode larval development	-26.4979
GO:0002164	larval development	-26.4456
GO:0009791	post-embryonic development	-25.9816
GO:0009792	embryo development ending in birth or egg hatching	-112.886
GO:0048513	organ development	-13.0508
GO:0048806	genitalia development	-8.1564
GO:0040035	hermaphrodite genitalia development	-8.1183
GO:0007275	multicellular organismal development	-105.908
GO:0048856	anatomical structure development	-18.6893
GO:0048731	system development	-10.8983
GO:0009653	anatomical structure morphogenesis	-9.1331
GO:0005622	intracellular	-38.1624
GO:0032991	macromolecular complex	-3.0832
GO:0043226	organelle	-12.2774
GO:0043232	intracellular non-membrane-bounded organelle	0
GO:0044446	intracellular organelle part	-11.1644
GO:0043228	non-membrane-bounded organelle	0
GO:0044422	organelle part	-9.2493
GO:0044424	intracellular part	-31.0782
GO:0043231	intracellular membrane-bounded organelle	-12.8163
GO:0043227	membrane-bounded organelle	-12.6215
GO:0043229	intracellular organelle	-12.4495
GO:0003674	molecular_function	-25.5063
GO:0005488	binding	-40.9326
GO:0005515	protein binding	-40.1852
GO:0003676	nucleic acid binding	-6.8368

## Sheet: GeneList
allgenes	confdown1.txt	confdown10.txt	confdown11.txt	confdown12.txt	confdown13.txt	confdown14.txt	confdown15.txt	confdown16.txt	confdown2.txt	confdown3.txt	confdown4.txt	confdown5.txt	confdown6.txt	confdown7.txt	confdown8.txt	confdown9.txt	confup1.txt	confup10.txt	confup11.txt	confup12.txt	confup13.txt	confup14.txt	confup15.txt	confup16.txt	confup2.txt	confup3.txt	confup4.txt	confup5.txt	confup6.txt	confup7.txt	confup8.txt	confup9.txt	D_genes.txt	DE_genes.txt	DX_genes.txt	EMB1_genes.txt	EMB10_genes.txt	EMB11_genes.txt	EMB12_genes.txt	EMB13_genes.txt	EMB14_genes.txt	EMB15_genes.txt	EMB16_genes.txt	EMB17_genes.txt	EMB2_genes.txt	EMB3_genes.txt	EMB4_genes.txt	EMB5_genes.txt	EMB6_genes.txt
2L52.1	3R5.1	B0019.1	B0303.3	B0303.3	B0240.1	2RSSE.1	2RSSE.1	B0198.1	3R5.1	AH10.2	AC3.1	AC3.2	AC3.2	AC3.7	B0238.11	B0019.1	AC3.1	2RSSE.2	AH10.3	AC7.2	4R79.1	4R79.1	4R79.1	AC7.1	2L52.1	2L52.1	B0019.1	B0285.7	B0001.6	B0019.1	B0240.1	2RSSE.2	3R5.1	AC3.1	AC3.5	AH6.5	B0035.2	B0035.14	B0198.3	2RSSE.1	2RSSE.2	B0222.3	AH9.7	4R79.1	AH10.2	B0025.2	AH9.3	2L52.1	B0024.12
2RSSE.1	AH6.5	B0024.11	B0395.3	B0334.15	B0395.1	AH10.1	2RSSE.2	B0205.3	AH10.2	AH6.5	B0025.2	B0001.2	AC3.7	B0024.12	B0495.6	B0205.8	AC3.2	AH10.1	B0205.4	AH9.4	AH9.6	4R79.2	4R79.2	AH6.11	AC3.2	B0024.12	B0041.2	B0564.1	B0024.13	B0240.1	B0350.3	B0001.6	AC7.1	AC3.6	B0205.6	AH9.2	B0303.3	B0228.6	B0228.5	AH10.3	AC7.2	B0272.1	B0034.7	AH9.1	B0001.7	B0207.4	B0035.9	B0025.1	B0024.3
2RSSE.2	AH9.2	B0304.1	C03H12.1	B0334.5	B0507.3	AH10.3	AC8.10	B0205.4	AH6.5	B0001.7	B0035.18	B0205.9	B0024.3	B0024.13	C02F12.4	B0391.5	AC3.7	AH10.3	B0222.4	AH9.6	B0024.6	AC3.10	AC3.10	AH6.7	AC3.7	B0024.3	B0228.6	C01A2.7	B0041.5	B0261.2	B0395.1	B0024.14	AC8.10	AC3.7	B0213.12	B0001.4	B0350.3	B0395.1	B0432.7	AH10.4	B0222.4	B0365.5	B0238.10	B0001.1	B0035.11	B0302.4	B0041.7	B0035.10	B0035.7
3R5.1	B0001.1	C03B1.1	C05A9.2	B0395.1	C01F1.3	B0024.14	AC8.11	B0222.3	AH9.2	B0001.8	B0205.9	B0212.3	B0034.5	B0024.3	C05C8.2	C02F12.4	AH10.2	B0198.1	B0250.2	B0212.1	B0024.8	AC3.3	AC3.3	B0024.15	AC8.12	B0025.1	B0273.4	C04F6.5	B0261.2	B0285.8	B0464.1	B0198.1	AC8.11	B0024.2	B0218.2	B0001.8	B0361.3	C01B7.1	B0564.10	B0198.1	B0393.5	B0379.6	B0303.2	B0024.8	B0285.4	B0303.8	B0212.3	B0035.8	B0205.12
4R79.1	B0001.2	C03H12.1	C05B5.4	C01H6.5	C01H6.5	B0198.3	AC8.3	B0222.6	B0001.2	B0035.1	B0218.1	B0222.9	B0212.3	B0205.12	C06A8.5	C07D10.5	B0207.4	B0205.4	B0310.1	B0222.4	B0034.3	AC3.5	AC3.5	B0034.3	AC8.7	B0041.7	B0285.7	C05A9.2	B0261.8	B0286.1	C05C8.7	B0198.3	AC8.12	B0035.5	B0222.1	B0025.4	B0395.3	C01F1.3	C01B7.3	B0205.4	B0410.1	B0395.2	B0310.6	B0034.1	B0285.9	B0310.2	B0238.11	B0302.2	B0280.10
4R79.2	B0001.4	C05B5.4	C06B8.1	C06A12.3	C03C10.2	B0222.4	AC8.4	B0286.1	B0001.4	B0035.18	B0218.5	B0252.2	B0222.1	B0207.4	C06E2.5	C08B11.9	B0212.3	B0222.4	B0353.1	B0228.4	B0207.3	AC7.1	AC7.1	B0034.4	AH9.3	B0212.3	B0304.1	C05C8.3	B0272.1	B0395.1	C05G6.1	B0228.5	AC8.3	B0198.2	B0222.11	B0035.1	B0414.7	C03A7.2	C01G5.7	B0205.5	B0464.5	B0491.4	B0334.13	B0041.3	B0303.14	B0454.9	B0252.2	B0336.1	B0284.3
6R55.2	B0024.10	C05D2.8	C06E7.4	C08F1.11	C03C10.5	B0412.2	AH10.1	B0334.11	B0001.7	B0035.6	B0238.1	B0252.3	B0222.9	B0222.1	C07G2.2	C13G5.1	B0222.9	B0240.3	B0412.1	B0238.1	B0207.8	AH6.11	AH6.7	B0212.2	B0024.12	B0218.3	B0304.3	C06E2.9	B0285.8	B0457.1	C06A5.6	B0240.1	AC8.4	B0213.10	B0222.2	B0035.12	B0457.1	C03C10.9	C01G5.9	B0244.7	C01B7.6	B0507.1	B0334.6	B0041.6	B0416.4	B0464.2	B0281.5	B0414.1	B0286.4
AC3.1	B0024.13	C06G3.5	C07A12.1	C09F9.2	C03G6.10	B0416.1	AH10.3	B0361.8	B0001.8	B0205.3	B0238.15	B0281.5	B0252.2	B0228.7	C09G4.5	C14B1.10	B0252.2	B0250.2	B0478.3	B0238.8	B0212.1	AH6.7	AH9.4	B0212.5	B0024.3	B0222.9	B0395.3	C06G3.5	B0286.1	B0564.10	C06G3.1	B0310.2	AC8.7	B0213.11	B0222.9	B0035.18	B0507.3	C03G6.8	C01H6.5	B0331.1	C01C7.1	C01A2.2	B0403.5	B0207.12	B0462.3	B0495.7	B0281.6	B0416.5	B0304.1
AC3.10	B0035.12	C07A12.1	C07A4.2	C10A4.3	C04A11.2	B0432.6	B0222.4	B0365.5	B0024.10	B0238.15	B0281.5	B0281.6	B0280.3	B0238.11	C10A4.8	C31C9.1	B0281.5	B0252.1	B0563.2	B0252.8	B0212.5	AH9.4	AH9.6	B0213.12	B0025.1	B0250.4	B0507.3	C06G8.1	B0303.3	C01B7.1	C06G3.5	B0353.1	B0001.6	B0213.14	B0238.5	B0035.3	C01G6.8	C04F1.3	C02B10.3	B0336.2	C01G12.1	C01B7.5	B0416.6	B0212.1	B0495.9	B0563.8	B0393.8	B0432.10	B0547.1
AC3.2	B0035.3	C07D10.5	C07A9.6	C10H11.3	C04G2.7	B0507.3	B0393.5	B0395.2	B0024.13	B0250.5	B0285.9	B0303.7	B0281.5	B0280.10	C13G5.1	C33A11.2	B0285.9	B0310.1	B0564.10	B0280.12	B0212.6	AH9.6	B0024.15	B0213.16	B0041.7	B0261.8	B0511.8	C07A12.7	B0334.15	C01F1.3	C10B5.3	B0361.9	B0024.14	B0213.15	B0244.10	B0035.4	C04A11.3	C04F6.4	C02B8.4	B0350.2	C02H7.3	C04C3.5	B0478.1	B0212.5	B0511.10	C01A2.5	B0410.2	B0432.9	C01G10.9
AC3.3	B0041.8	C08H9.3	C08B11.4	C11E4.1	C05C8.7	C01B7.6	B0416.1	B0491.4	B0035.11	B0273.2	B0303.14	B0464.7	B0302.4	B0280.3	C15F1.4	C34C12.3	B0303.14	B0393.5	C01B12.1	B0280.13	B0218.1	B0024.4	B0024.4	B0213.2	B0212.3	B0272.4	C01B7.1	C07G2.2	B0334.5	C03C10.2	C14B9.2	B0393.5	B0024.15	B0222.5	B0244.5	B0035.6	C04F6.5	C05C8.7	C02D5.4	B0353.1	C03G6.6	C05D10.2	B0491.6	B0212.6	B0511.7	C01G12.5	B0464.7	B0495.8	C02B10.5
AC3.4	B0205.3	C09G12.1	C08F1.11	C14B9.2	C06E1.8	C01G6.1	B0454.6	B0495.2	B0035.12	B0273.3	B0303.8	B0513.6	B0304.6	B0280.4	C31C9.1	C35E7.10	B0303.3	B0414.2	C01B12.4	B0280.2	B0238.12	B0024.6	B0034.1	B0213.3	B0218.1	B0273.4	C01G10.9	C10A4.8	B0361.5	C03C10.5	C15H11.4	B0395.3	B0024.6	B0228.1	B0252.1	B0041.5	C05A9.2	C05G6.1	C03A3.1	B0414.2	C04A11.4	C06E7.88	B0495.10	B0228.4	B0563.1	C01G5.6	B0513.1	C05D10.3	C03D6.8
AC3.5	B0238.15	C10A4.3	C09F9.2	C17E7.13	C07H6.3	C01G6.8	BE0003N10.3	B0511.5	B0035.16	B0280.9	B0310.2	B0563.8	B0432.10	B0336.1	C33F10.13	C35E7.6	B0303.8	B0432.6	C01C10.4	B0286.3	B0238.8	B0024.8	B0034.5	B0213.4	B0218.3	B0280.10	C02B8.6	C12D5.8	B0391.10	C04F1.3	C17H12.8	B0412.2	B0024.9	B0238.1	B0280.3	B0041.8	C05D9.3	C06A6.5	C03C10.5	B0416.1	C04D8.1	C07A9.5	B0496.8	B0240.3	B0564.1	C03H5.7	BE10.3	C05G5.2	C04F6.3
AC3.6	B0238.9	C12D5.2	C09G5.2	C23G10.6	C11E4.1	C01H6.5	C01B7.5	B0563.2	B0035.3	B0285.4	B0336.8	BE10.3	B0454.9	B0432.10	C34E7.4	C36F7.1	B0304.6	B0432.7	C01G12.1	B0302.5	B0244.2	B0034.5	B0034.7	B0222.1	B0222.9	B0280.4	C02C6.2	C13B9.3	B0391.5	C05C8.7	C23H3.1	B0416.1	B0034.5	B0240.1	B0285.6	B0205.1	C06B8.1	C06E7.4	C03G6.10	B0432.6	C04E7.3	C07D10.1	B0563.2	B0250.2	C01B4.6	C04H5.6	C01F6.5	C07B5.8	C04H5.1
AC3.7	B0240.4	C12D5.9	C10A4.3	C26C6.7	C15B12.9	C04A11.2	C01B7.6	C01A2.2	B0035.6	B0285.9	B0416.4	BE10.5	BE10.3	B0454.9	C35E7.6	C38C10.4	B0310.2	B0491.4	C02C6.3	B0310.1	B0244.5	B0034.7	B0035.13	B0222.5	B0228.7	B0281.6	C02F12.4	C13G5.2	B0395.1	C05D10.1	C25F6.2	B0462.1	B0035.16	B0252.8	B0285.8	B0205.3	C06G3.5	C06H5.6	C04A11.2	B0462.1	C04G6.3	C07E3.5	BE10.2	B0272.4	C02B10.4	C05C10.1	C01G6.3	C08B11.3	C05C8.6
AC3.8	B0244.8	C13G5.1	C10H11.3	C26E6.2	C15C7.4	C05C8.7	C01G12.1	C01B10.11	B0041.5	B0303.14	B0432.2	C01B4.6	BE10.5	B0464.6	C37E2.4	C40A11.4	B0336.1	B0495.4	C03H5.1	B0331.2	B0252.8	B0035.13	B0198.2	B0222.7	B0238.1	B0284.3	C02F12.8	C14A4.1	B0395.3	C05G6.1	C25F6.4	B0507.3	B0047.2	B0280.8	B0294.1	B0205.8	C06G3.6	C07E3.6	C05E11.3	B0511.1	C05E11.7	C09G9.3	C01B10.10	B0280.12	C02F5.13	C05C10.2	C01H6.7	C08B11.7	C05D9.7
AC7.1	B0261.1	C15H9.6	C12D5.8	C26E6.3	C17E4.1	C05E11.7	C01G6.8	C01C10.1	B0041.8	B0303.3	B0462.3	C01B9.4	C01B9.4	B0495.6	C39B5.2	C45G9.2	B0462.3	B0496.8	C04G2.7	B0334.3	B0280.12	B0198.2	B0205.13	B0228.4	B0238.11	B0285.7	C04C11.2	C14B1.1	B0416.6	C06B8.7	C30F8.4	C01B7.4	B0047.3	B0284.1	B0303.11	B0205.9	C07A9.6	C07H6.7	C07F11.1	C01B10.5	C06G1.6	C10G6.1	C01B10.11	B0280.13	C03C10.3	C05D12.4	C01H6.9	C09G4.4	C05E11.1
AC7.2	B0261.7	C15H9.7	C12D5.9	C27B7.8	C24B5.4	C05E4.9	C04E7.3	C01C10.4	B0205.3	B0303.8	B0464.7	C01F6.5	C01H6.9	B0511.10	C40A11.3	C49A9.8	B0495.7	B0507.10	C05C8.8	B0336.11	B0280.13	B0205.13	B0207.10	B0244.10	B0250.4	B0286.4	C04F6.3	C16H3.3	B0511.1	C06E7.4	C31E10.6	C02B8.4	B0205.7	B0286.3	B0304.7	B0207.6	C07B5.6	C09C7.1	C08C3.1	C01B7.4	C07G1.4	C11H1.3	C01G10.10	B0286.2	C03H5.3	C05D12.5	C02F5.1	C15H9.8	C06A1.5
AC7.3	B0273.2	C18A3.2	C14B1.1	C34F6.5	C26B9.1	C06C3.1	C05E4.11	C01F1.5	B0205.9	B0304.4	B0513.2	C01G12.3	C04C3.1	B0511.7	C41H7.2	C55B7.8	B0563.1	B0564.10	C05C9.1	B0348.5	B0280.7	B0207.10	B0207.12	B0244.11	B0252.2	B0304.1	C05A9.2	C18E9.10	B0545.4	C06H5.6	C32D5.2	C03A7.13	B0207.3	B0304.6	B0336.9	B0238.15	C08B6.7	C10G8.6	C08C3.3	C01C10.1	C08G9.2	C13C12.2	C01G6.9	B0302.1	C05C8.9	C06A1.6	C03B1.12	C17G1.4	C06A8.5
AC8.10	B0273.3	C23H3.3	C14B9.2	C36F7.1	C26E6.2	C06E1.8	C05G6.1	C01G6.6	B0207.6	B0310.2	B0563.1	C03B1.12	C04F5.7	B0511.9	C49A1.4	F08C6.2	B0563.8	C01A2.2	C05D12.1	B0365.5	B0285.10	B0207.12	B0207.3	B0244.2	B0252.3	B0304.3	C05D9.3	C27H6.8	B0564.11	C07A9.6	C34G6.6	C03H5.5	B0212.2	B0334.1	B0414.8	B0238.9	C08F1.11	C14B9.2	C10F3.2	C01C10.4	C09E10.2	C14A11.2	C01H6.2	B0302.5	C05D11.1	C06C3.7	C03B1.7	C17G10.4	C07B5.5
AC8.11	B0280.3	C24H12.7	C17C3.1	C44E12.1	C27A12.5	C06H5.2	C06B8.7	C01G8.3	B0238.9	B0336.7	B0563.8	C03B1.13	C05D10.3	B0547.1	C50F2.4	F10C5.1	BE10.3	C01B10.11	C05E11.7	B0391.4	B0286.2	B0207.2	B0213.10	B0244.4	B0281.5	B0334.11	C05D9.7	C29E6.1	B0564.7	C07F11.1	C36E8.4	C04C3.5	B0213.16	B0361.10	B0454.6	B0240.4	C09B8.7	C14F11.2	C15B12.9	C01G6.1	C09F5.1	C14A4.15	C01H6.3	B0310.1	C05D11.3	C08A9.7	C03B8.4	C18G1.2	C07D10.6
AC8.12	B0280.5	C28H8.6	C17C3.3	C45E1.1	C29E4.15	C07H6.3	C06C3.1	C02B8.6	B0240.4	B0348.6	B0564.10	C04C3.1	C05D9.7	C01G10.9	C55C2.1	F11A5.9	BE10.5	C01B12.1	C05E4.13	B0393.1	B0286.3	B0207.3	B0213.11	B0244.5	B0281.6	B0336.1	C05G5.5	C31C9.1	C01B10.10	C07H6.1	C44F1.1	C04F12.3	B0238.13	B0361.9	B0457.2	B0250.5	C09F9.2	C15H9.1	C17D12.2	C02H7.1	C09F5.3	C14H10.2	C01H6.4	B0336.10	C05D11.7	C08E3.3	C04C3.1	C24H12.12	C07H6.9
AC8.3	B0285.1	C30F8.4	C25B8.4	C47E12.8	C31C9.7	C08G5.7	C06G1.4	C02D4.1	B0244.8	B0361.2	BE10.3	C04F12.1	C05E4.1	C02B8.6	D2005.1	F13H8.2	C01B4.1	C01C10.1	C05E4.3	B0393.5	B0303.11	B0207.8	B0213.12	B0280.13	B0285.7	B0336.4	C06B8.7	C32B5.1	C01B10.8	C08B11.4	C44H9.7	C04F6.4	B0238.7	B0379.1	B0511.5	B0252.4	C09G12.1	C17D12.1	C17E4.1	C04A2.3	C10H11.1	C14H10.3	C01H6.8	B0336.11	C06A5.12	C08F1.8	C04E7.2	C25B8.4	C08B11.2
AC8.4	B0303.4	C32B5.1	C28G1.2	C53H9.2	C34G6.6	C08G9.2	C06G1.6	C02F5.4	B0250.5	B0361.6	C01B4.1	C05B5.11	C05E4.12	C02F5.4	E04A4.1	F16H6.11	C01F6.5	C01C4.3	C05G5.1	B0395.2	B0331.2	B0212.1	B0213.14	B0286.6	B0285.8	B0395.3	C06E2.9	C33D9.13	C01B7.1	C08C3.1	C50E3.13	C04F6.5	B0238.8	B0393.9	B0554.7	B0261.1	C10A4.3	C17H11.6	C17E7.13	C04G2.7	C13F10.4	C15C8.2	C02C2.3	B0344.2	C06A5.9	C09G1.3	C05B5.4	C26C6.5	C08B11.9
AC8.7	B0304.2	C33A11.2	C28H8.2	C54D1.4	C37E2.2	C09G5.8	C07F11.1	C02F5.7	B0261.1	B0361.8	C01B4.6	C05C10.2	C06E2.9	C04F5.7	F08C6.6	F19B10.4	C01G12.3	C01G12.1	C05G5.7	B0416.3	B0344.2	B0212.5	B0213.17	B0303.11	B0304.1	B0507.3	C06G1.4	C33F10.8	C01F1.3	C09F9.2	C53D6.4	C04G2.7	B0244.2	B0403.6	B0563.10	B0261.4	C10E2.6	C23F12.4	C18D4.6	C04G6.4	C14B4.2	C18E3.4	C02D5.1	B0348.4	C07A9.2	C09H6.1	C05C8.2	C26E6.9	C08F8.1
AH10.1	B0304.4	C33F10.7	C32B5.1	C54E4.4	C37E2.5	C10C5.1	C07H6.3	C03G5.7	B0261.7	B0379.3	C01F1.2	C05D9.1	C07A9.3	C04F6.3	F08G2.1	F22B7.13	C01G12.8	C01G5.7	C06C3.12	B0454.10	B0365.3	B0212.6	B0213.4	B0344.2	B0304.3	B0511.8	C06G3.10	C35C5.4	C01G6.6	C09H6.2	C54E4.4	C05B5.7	B0252.3	B0416.3	B0563.7	B0261.7	C14B1.1	C23H3.1	C18F10.4	C06C3.1	C16D9.2	C24A1.2	C02D5.2	B0365.3	C07G1.8	C16C10.4	C05D11.10	C27A12.10	C08F8.8
AH10.2	B0334.4	C36E6.1	C33F10.7	C55A6.5	C38C3.5	C10E2.6	C08G9.2	C05D2.6	B0273.2	B0393.3	C01F4.2	C06A6.2	C07B5.5	C05D10.3	F10B5.5	F23D12.5	C01G6.3	C01G5.9	C06C3.4	B0478.1	B0365.7	B0213.14	B0213.5	B0365.3	B0304.6	B0523.3	C06G8.1	C44C1.1	C02B10.3	C10B5.3	C54F6.13	C05D10.2	B0284.2	B0416.7	C01A2.7	B0272.2	C16C2.1	C24B5.3	C26E6.2	C06C3.4	C18C4.10	C25A1.2	C02F12.1	B0393.7	C07H6.4	C18D11.4	C05E4.12	C27H6.4	C08G5.2
AH10.3	B0334.8	C37A5.2	C34E10.7	D1022.4	C52D10.3	C10H11.9	C09B8.7	C05E11.7	B0273.3	B0414.3	C01F6.5	C08A9.6	C07B5.8	C05D9.7	F13A7.13	F23F1.9	C03B1.12	C01H6.3	C06E1.8	B0491.4	B0379.4	B0218.1	B0218.1	B0365.7	B0310.2	C01A2.1	C07A12.1	C44H4.3	C02F5.11	C10C5.1	D1022.1	C05D11.4	B0304.9	B0454.5	C01B12.5	B0273.2	C17G1.5	C24H10.3	C27A12.5	C06E1.8	C23H3.9	C25B8.8	C03G6.12	B0454.10	C08C3.2	C18E3.2	C06A6.2	C28H8.9	C09H10.7
AH10.4	B0336.13	C39D10.8	C34F6.8	D2013.8	C54D1.4	C14F11.2	C09F5.1	C05E4.3	B0280.5	B0414.5	C01G12.3	C08A9.7	C08F1.3	C05E11.1	F17C11.17	F28D1.1	C03B1.13	C01H6.5	C06E8.3	B0507.1	B0379.6	B0218.2	B0218.2	B0399.1	B0336.1	C01G10.9	C07A12.4	C47E12.1	C03C10.2	C10E2.6	E01A2.1	C05D9.3	B0334.2	B0457.6	C01B4.8	B0280.1	C24A8.4	C25F6.4	C29E4.15	C06G1.5	C24A1.3	C26D10.4	C03H5.6	B0454.8	C09H10.3	C23G10.8	C06E1.1	C29F3.1	C10F3.4
AH6.2	B0336.5	C40A11.4	C37C3.7	E04F6.9	C54D10.10	C14F5.3	C09G5.8	C06B8.2	B0280.9	B0414.6	C01G12.5	C08F8.4	C08F1.6	C06A8.5	F17E9.10	F28D1.2	C03H5.7	C02C2.3	C06G4.6	B0507.6	B0391.4	B0218.6	B0218.6	B0410.3	B0403.4	C02B8.6	C07A12.7	C47E12.4	C03C10.5	C12D5.9	E04A4.5	C05E4.9	B0361.4	B0462.4	C01C10.3	B0280.9	C24A8.6	C25H3.12	C30A5.7	C07B5.4	C24H11.7	C27A7.4	C04F12.3	B0496.2	C10E2.4	C24G6.8	C06E2.5	C31H2.4	C10F3.5
AH6.3	B0336.6	C43E11.1	C39B10.1	F08G2.7	C55A6.5	C16D9.2	C09H6.2	C06E7.88	B0285.1	B0416.4	C01G12.8	C08F8.5	C08F8.4	C06E1.1	F17E9.13	F28D9.4	C04G2.9	C02F12.9	C07A9.12	B0563.2	B0395.2	B0222.11	B0222.1	B0412.2	B0410.2	C03B1.13	C07D10.5	C50F2.6	C03H5.5	C14B9.2	E04F6.9	C06E1.8	B0361.5	B0464.4	C02E7.10	B0285.1	C24G6.4	C26C6.7	C32B5.13	C07G1.3	C25H3.11	C29E6.2	C05B5.3	B0496.3	C11D2.7	C24H11.3	C07E3.1	C31H5.4	C12D8.1
AH6.5	B0336.8	C43H8.2	C43H8.2	F09D1.1	D1005.2	C23F12.1	C10C5.1	C07D10.1	B0285.4	B0432.1	C01G5.6	C09B8.5	C08F8.5	C06E2.5	F18C5.10	F33H2.1	C05B5.11	C02H7.1	C07A9.13	B0563.6	B0399.2	B0222.7	B0222.11	B0432.11	B0416.5	C03B1.7	C07G2.2	C53H9.2	C04C11.2	C15H9.1	F01D4.8	C06E7.4	B0361.7	B0478.3	C03A3.2	B0285.5	C25F6.2	C33G3.6	C32D5.12	C07H6.3	C25H3.8	C31B8.7	C05C9.1	B0496.7	C11H1.8	C25A1.4	C07E3.8	C32B5.15	C13C4.4
AH9.1	B0348.6	C44F1.1	C44C1.1	F11F1.7	D1022.1	C25A11.4	C10H11.1	C08F1.8	B0285.9	B0432.2	C02B10.4	C09G4.4	C08G5.2	C06E2.9	F22F1.1	F35B12.5	C05C10.1	C03G6.12	C07E3.10	B0564.6	B0403.3	B0238.1	B0222.6	B0457.2	B0464.7	C03H12.1	C08F1.10	C54E4.5	C04F1.3	C17C3.3	F02C12.5	C06G1.5	B0379.4	B0491.7	C03A7.12	B0303.15	C26B9.1	C34C6.6	C32D5.2	C08D8.2	C26D10.5	C31H1.7	C05D11.13	B0545.1	C13B9.2	C25G4.10	C08A9.6	C34E10.7	C14A4.5
AH9.2	B0361.6	C47E12.1	C44F1.1	F13D12.2	D1086.12	C26E6.2	C10H11.9	C09F5.1	B0303.14	B0464.9	C02F5.6	C09H6.1	C09B8.4	C06G8.1	F23D12.5	F35G12.8	C05D10.3	C04C3.5	C07E3.3	B0564.9	B0403.6	B0238.10	B0222.7	B0464.4	B0511.6	C04A2.3	C08F8.8	D2045.7	C05A9.2	C17D12.2	F02G3.1	C06G1.6	B0403.2	B0507.2	C03A7.13	B0303.4	C27A12.9	C34F6.5	C33C12.10	C08G5.7	C26G2.1	C33B4.5	C05D9.4	B0546.4	C13F10.7	C27A2.6	C08A9.8	C34F6.4	C14B1.5
AH9.3	B0361.7	C47E12.7	C44H4.3	F22B7.10	F01E11.1	C29E6.1	C14C11.8	C09G9.3	B0303.4	B0491.5	C03B1.13	C10A4.5	C09B8.5	C07A9.2	F26F4.13	F40G9.15	C05D11.7	C04E7.4	C07E3.5	C01B10.11	B0454.10	B0244.2	B0222.8	B0491.8	B0564.10	C04C3.1	C08G5.2	DC2.3	C05B5.7	C17H11.2	F09F7.4	C06H5.6	B0410.3	B0507.6	C03B8.2	B0303.7	C33G8.7	C34G6.6	C36E8.4	C09G4.1	C27F2.1	C33H5.2	C05G5.1	B0564.6	C14B1.4	C27C7.7	C08F1.3	C36A4.8	C14C10.6
AH9.4	B0379.4	C47F8.2	C46C2.2	F28B4.4	F01G10.9	C31H1.2	C15C8.2	C10G6.1	B0304.2	B0511.10	C03C10.3	C10C5.4	C09G1.3	C07B5.5	F27E5.2	F40G9.5	C05D12.4	C05D11.4	C07H6.3	C01B10.6	B0454.6	B0244.4	B0238.10	B0496.3	C01A2.1	C04F6.3	C08H9.2	DY3.3	C05D11.12	C17H11.6	F10G8.8	C07B5.4	B0432.1	B0507.7	C03F11.1	B0304.2	C34C6.2	C35C5.11	C37E2.2	C09G5.8	C32D5.3	C34D4.1	C05G5.3	B0564.9	C14B9.4	C27H6.2	C08F1.6	C36B7.6	C16C10.5
AH9.6	B0393.2	C54F6.13	C47E12.1	F38A1.10	F08G2.7	C34E11.7	C15H9.1	C10G8.3	B0304.4	B0511.13	C03H5.7	C10C5.5	C09G1.5	C07G2.2	F28B12.3	F44A6.2	C05D12.5	C05E4.13	C08G5.4	C01C10.2	B0454.8	B0250.9	B0244.2	B0513.9	C01B9.4	C05B5.4	C08H9.3	E02A10.1	C05D9.3	C18H2.1	F11A10.4	C09F5.1	B0432.5	B0507.9	C03F11.3	B0304.4	C34E10.1	C36B1.9	C39D10.5	C10H11.9	C32E8.10	C35C5.6	C06B8.2	BE10.4	C15C6.3	C28H8.1	C08F8.5	C36E6.2	C16C10.8
AH9.7	B0393.6	C54G7.2	C47E12.8	F38A5.2	F13D11.2	C34G6.6	C16D9.2	C10H11.10	B0304.5	B0511.7	C04F12.5	C10E2.4	C09H10.6	C07H6.9	F28D1.2	F44E7.2	C05E4.1	C05E4.3	C08G5.5	C01F1.5	B0491.4	B0252.3	B0244.4	B0554.1	C01F6.5	C05D10.3	C09B8.7	E04A4.5	C06B8.1	C23H3.1	F11D5.3	C09G5.8	B0491.8	B0554.1	C03F11.4	B0334.11	C37A5.9	C43C3.3	C43E11.6	C11H1.7	C32E8.11	C35E7.4	C06E4.2	C01F6.6	C16C8.11	C29F7.4	C09B8.5	C37A2.4	C17E4.11
B0001.1	B0414.3	C55B7.8	C47F8.2	F39B1.1	F13H8.1	C37A5.1	C17D12.2	C10H11.8	B0334.11	B0511.9	C04F12.9	C10E2.5	C10B5.1	C08B11.8	F32B6.3	F49B2.3	C06A1.6	C05G5.3	C08G5.7	C01G12.1	B0491.8	B0252.8	B0250.9	B0563.6	C01G10.9	C05D9.5	C09E7.9	F07B7.10	C06E7.4	C23H4.1	F13G3.5	C10F3.2	B0495.5	B0563.4	C03G6.3	B0334.4	C37C3.7	C43H6.7	C43F9.8	C14F11.6	C33B4.3	C39B5.10	C06G3.7	C01G10.11	C17C3.10	C29F7.5	C10E2.5	C37A2.5	C18A3.9
B0001.2	B0414.5	D1054.13	C47F8.8	F40E10.1	F14B8.1	C37C3.6	C17E7.8	C11D2.4	B0334.8	B0513.2	C04F5.8	C15F1.5	C10C5.3	C08B11.9	F35B12.5	F49D11.10	C06C3.7	C05G5.7	C08G9.2	C01H6.2	B0496.5	B0280.12	B0252.3	C01B10.3	C01G5.6	C05D9.7	C09F9.2	F07B7.3	C06G3.10	C24A8.4	F14H12.8	C11E4.1	B0496.5	B0563.5	C04E12.11	B0334.8	C39D10.3	C44E12.1	C46F11.6	C14F5.1	C33D9.1	C39E9.10	C07D10.4	C01G8.5	C17C3.7	C30G4.3	C10G11.7	C37H5.5	C24H11.6
B0001.3	B0432.13	D2045.7	C53H9.2	F42A10.8	F18C5.10	C38C3.5	C23F12.1	C13B4.2	B0336.13	B0546.1	C04H5.8	C15H11.3	C10C5.4	C08F8.8	F35E2.2	F49E12.1	C06C3.8	C06B8.2	C09B9.8	C02C6.3	B0507.1	B0280.3	B0252.5	C01B10.6	C01G6.3	C05E11.1	C10A4.8	F08C6.4	C06G3.5	C24B5.3	F17E5.2	C12D5.7	B0511.6	C01B10.9	C04E12.6	B0336.13	C39F7.5	C44E4.2	C46H3.3	C15H9.5	C33F10.5	C40D2.3	C07E3.9	C02B4.1	C17C3.8	C30G4.6	C11G6.1	C38D4.9	C25F6.1
B0001.4	B0432.8	D2045.9	C54F6.13	F48B9.1	F23F1.7	C44H4.2	C24A1.2	C13C12.2	B0336.3	B0546.2	C05B5.11	C15H11.6	C10C5.5	C09B8.4	F35H10.1	F49E12.5	C08A9.7	C06C3.1	C09F5.1	C02E7.2	B0563.5	B0280.7	B0252.8	C01B4.1	C01H6.7	C05G5.5	C10E2.6	F09C12.8	C06G3.9	C24G6.6	F20B10.1	C13C4.5	B0546.3	C01B12.2	C04E12.7	B0336.3	C41H7.5	C45B11.2	C54D10.6	C23F12.1	C34E11.3	C42C1.5	C08B6.4	C02C2.5	C17D12.7	C31B8.9	C11G6.2	C39E6.1	C25G4.5
B0001.5	B0464.4	E01A2.1	C54G7.2	F48F7.3	F27D9.6	C46H11.11	C24A8.4	C13C4.5	B0336.5	B0563.1	C05C10.1	C16C10.1	C10C6.5	C09D4.2	F40F4.3	F59A3.4	C08A9.8	C06C3.4	C09G1.4	C02E7.5	B0563.6	B0281.3	B0272.4	C01B4.9	C02B10.5	C06A6.2	C12D5.2	F10E9.6	C07A12.1	C25F6.2	F28F8.6	C14A4.12	B0563.6	C01B12.3	C04E6.7	B0336.5	C44B9.1	C53D5.1	C54F6.10	C23G10.5	C34E11.7	C43H6.9	C09B7.2	C02C6.1	C17E4.5	C31E10.5	C11H1.4	C39E6.4	C25G6.5
B0001.6	B0464.6	E01A2.7	D1005.2	F48G7.2	F31D4.8	C46H3.3	C25A11.4	C14A4.11	B0336.6	B0564.1	C05C10.2	C16C4.6	C11G6.2	C09G1.5	F44A6.2	F59A6.1	C08B11.9	C06C3.9	C09G9.5	C02E7.6	B0563.7	B0284.1	B0280.7	C01B7.5	C02B8.6	C06A8.3	C12D8.1	F10G2.6	C07A4.2	C25F6.4	F32H2.5	C14B1.1	C01B10.4	C01B7.7	C04E7.4	B0336.7	C44C1.1	C54D10.13	C54G10.3	C24B5.4	C34F6.10	C44B7.3	C09B8.3	C02C6.2	C18F10.7	C32B5.10	C17E4.2	C40A11.10	C30C11.1
B0001.7	B0464.8	E04F6.5	D1022.1	F48G7.4	F35B3.7	C50F2.6	C26G2.1	C14B1.4	B0336.7	B0564.11	C05D11.11	C17F4.8	C13G5.2	C09G4.3	F44A6.3	F59A6.5	C08E3.3	C06E1.8	C10F3.3	C02F4.4	BE10.2	B0285.10	B0281.3	C01B7.7	C02F12.10	C06A8.5	C13B9.3	F11C1.6	C07A9.6	C25F9.1	F40E10.1	C14F11.2	C01C4.3	C01B9.4	C04F12.10	B0336.8	C44H4.2	C56C10.10	C56E10.4	C24H10.1	C34F6.9	C44F1.5	C09E7.2	C02C6.3	C24H11.9	C32F10.6	C17F4.8	C40A11.2	C31E10.7
B0001.8	B0464.9	F02G3.1	D1022.4	F49E8.1	F37H8.5	C56G2.6	C32E12.4	C14E2.4	B0348.6	C01B4.1	C05D11.7	C17G1.3	C16C4.17	C09G4.5	F44B9.7	F59B1.8	C08E3.6	C06G1.5	C10G8.3	C02F5.7	C01B10.6	B0285.6	B0284.1	C01B9.1	C03B1.13	C06E1.1	C13G3.3	F11D11.12	C07E3.6	C26E6.2	F41E6.6	C15A7.1	C01F1.4	C01C10.2	C04H4.1	B0348.6	C44H4.3	C56G2.3	CE7X_3.2	C25A1.11	C41A3.1	C44H4.1	C10F3.7	C02E7.4	C24H12.5	C33A12.1	C18A11.5	C40A11.6	C32B5.7
B0019.1	B0495.2	F07B7.10	D2045.7	F53B3.5	F38E11.3	D1044.2	C34E11.3	C14H10.2	B0361.2	C01G10.8	C05D12.4	C18A11.5	C16C4.5	C10A4.8	F45H11.1	F59D12.4	C08F1.3	C06G4.6	C10G8.5	C02H7.3	C01B4.7	B0286.2	B0284.2	C01F1.6	C03B1.7	C06G1.4	C13G5.1	F11D5.3	C07H6.1	C26G2.1	F42A10.8	C15B12.9	C01F4.2	C01G10.16	C04H5.8	B0361.2	C44H9.7	CD4.3	D1007.1	C25A11.4	C42D8.5	C46E10.5	C11H1.9	C02E7.5	C25A1.10	C33A12.12	C18A3.5	C42D4.2	C33G3.4
B0019.2	B0511.13	F07B7.11	D2045.9	F53F1.2	F41E6.6	EGAP7.1	C34F6.1	C14H10.3	B0361.6	C01G12.3	C05D12.5	C18D1.1	C16C4.6	C10C5.3	F46C8.3	F59D6.1	C08F1.6	C06H5.2	C10G8.8	C03F11.1	C01B4.9	B0286.3	B0285.6	C01F4.2	C03B8.4	C06G3.9	C14F11.2	F13G3.6	C07H6.7	C27H2.2	F44G4.8	C17H12.9	C01G10.12	C01G6.4	C05B5.5	B0361.6	C45B11.6	D1014.8	EGAP9.2	C25B8.5	C42D8.8	C47E8.9	C13C4.1	C02E7.8	C25A1.9	C33E10.1	C18D1.1	C44B9.6	C34B2.10
B0024.1	B0523.3	F07B7.3	DC2.5	F54F3.1	F41E7.2	F07A11.2	C34G6.6	C15C8.2	B0361.7	C01G12.5	C05D9.1	C18E3.3	C17F4.8	C13C4.4	F46F3.1	H20J04.4	C08F1.8	C06H5.6	C10H11.1	C03G5.7	C01B7.5	B0302.5	B0286.2	C01F6.6	C03H12.1	C06G8.1	C15F1.3	F17E9.9	C08B11.4	C27H5.3	F46C8.7	C18D11.1	C01G8.4	C01H6.1	C05C12.3	B0361.8	C46C11.1	D1025.1	F02E9.2	C26C6.2	C43G2.2	C54C8.4	C13C4.2	C02F12.7	C25D7.6	C33H5.12	C18E3.3	C44C10.4	C34C6.9
B0024.10	B0524.6	F07B7.4	E01A2.7	F55B12.5	F45E10.2	F07C6.4	C37C3.6	C15H11.4	B0361.8	C01G12.8	C06A1.6	C23H5.1	C17G1.3	C14B1.4	F49E12.6	K01D12.14	C08F8.4	C07A4.1	C11E4.6	C03H5.1	C01B9.1	B0303.11	B0286.3	C01G12.2	C04E7.2	C07A12.3	C16A3.6	F21D5.9	C08C3.1	C28C12.10	F47C12.6	C18D11.7	C02B4.2	C02B4.4	C05D11.9	B0379.3	C47E12.13	D1081.2	F13D11.2	C27C12.6	C44B11.1	C54D2.6	C13C4.3	C02F4.2	C26E6.4	C35D6.3	C18E9.3	C45G3.1	C34E7.4
B0024.11	B0546.2	F08C6.2	F02G3.1	F56D12.6	F47F6.1	F09A5.4	C41C4.12	C16A11.10	B0379.3	C01G5.5	C06A5.12	C24B5.2	C18A11.5	C15H11.4	F52B5.7	K01G5.6	C09B8.4	C07G1.3	C12D12.5	C04A11.1	C01C4.2	B0303.16	B0302.5	C01G12.6	C04F6.3	C07B5.5	C16B8.4	F21H11.3	C08F1.11	C29E6.1	F48B9.1	C18F10.8	C02D4.2	C02C2.1	C05D2.1	B0393.2	C47E12.8	E01G6.3	F13E6.4	C29E4.5	C44C1.4	C54F6.4	C13G3.2	C02G6.3	C27A12.6	C35E7.1	C18F3.4	C46C11.4	C35C5.4
B0024.12	B0564.11	F08C6.4	F08B12.2	F57G12.1	F48C1.6	F10F2.1	C41H7.5	C17C3.3	B0393.2	C01G6.5	C06A5.9	C24H12.8	C18A3.5	C15H11.7	F52C6.14	K02F3.2	C09G1.3	C07H6.3	C14A11.6	C04E6.2	C01F1.5	B0304.9	B0303.11	C01G12.7	C04H5.8	C07B5.8	C16H3.3	F23B12.4	C09E7.4	C30F8.4	F48C1.6	C25B8.3	C02F5.3	C02D5.3	C05E11.6	B0393.3	C50F2.6	EEED8.2	F14H12.8	C29E6.5	C45B2.7	C56E6.1	C14A4.9	C03A3.3	C27A12.7	C36E6.1	C23H4.6	C46H3.2	C35D10.16
B0024.13	B0564.7	F08G12.10	F08C6.4	F59B10.1	F48F7.3	F10G8.8	C42D8.5	C24A1.2	B0393.3	C02B10.1	C06C3.8	C25A1.1	C18E3.5	C16C10.4	F54D11.1	K04C2.4	C10A4.5	C08D8.2	C14A11.7	C04F6.2	C01F4.2	B0310.5	B0310.1	C01G6.5	C05B5.11	C07D10.5	C17G1.4	F26H11.2	C09G12.1	C33A11.1	F52E10.5	C25B8.6	C02F5.7	C02E7.1	C05E11.8	B0393.6	C54D1.4	F01E11.1	F25D1.3	C29F7.3	C45E5.6	D1007.15	C15A7.1	C03A7.14	C27B7.2	C38D9.8	C24A8.3	C47D12.1	C35D10.17
B0024.14	BE0003N10.1	F08G2.1	F10G7.1	H02I12.4	F49F1.14	F11C7.4	C43E11.6	C24B5.4	B0393.6	C02B10.4	C07A12.5	C25B8.1	C23H4.4	C17G1.3	F54E12.1	K06A5.4	C10C5.3	C08E8.4	C14A4.15	C04G2.7	C01G12.7	B0334.1	B0310.5	C02B4.1	C05B5.4	C08A9.6	C17H11.6	F29B9.9	C09G4.1	C33B4.3	F54F3.1	C25F6.4	C03A7.10	C02F12.5	C05E4.2	B0414.3	C54F6.9	F01E11.4	F25D7.3	C29F9.1	C45G3.4	D1037.2	C15B12.6	C03B1.5	C32E8.5	C41H7.6	C24H12.1	C49A1.4	C35D10.9
B0024.15	BE0003N10.2	F10G7.1	F11A3.1	H06I04.1	F52B11.3	F11D5.1	C44B9.1	C24D10.4	B0414.3	C02F5.13	C07D8.6	C25G4.10	C23H4.6	C18A3.5	F54E7.9	K07F5.14	C10C5.4	C08G9.2	C14F11.5	C04H5.3	C02B4.1	B0334.13	B0310.6	C02C2.1	C05C10.1	C08B11.7	C18A3.8	F32D1.3	C09H6.2	C34F6.10	F55D10.1	C26B2.3	C03A7.3	C02H6.2	C05E7.3	B0414.5	C55B7.12	F09F9.4	F29F11.6	C29F9.7	C46H11.11	EEED8.10	C15C7.7	C03F11.2	C33E10.10	C43E11.1	C24H12.10	C49H3.6	C36B1.5
B0024.2	C01B10.8	F13B9.6	F11F1.7	H19M22.3	F52D2.7	F13D11.2	C45B2.7	C25B8.1	B0414.5	C02F5.6	C07G2.3	C27A7.1	C23H5.1	C18A3.8	F55G1.11	K08C7.3	C10G11.1	C09F12.2	C14F5.2	C05B5.3	C02C2.5	B0334.7	B0334.1	C02E7.13	C05C10.2	C08B11.9	C24A8.4	F32H2.6	C10A4.3	C34F6.5	F55F8.1	C29E6.5	C03B1.2	C02H7.2	C06A12.4	B0414.6	C56E6.2	F11C1.7	F31D4.2	C32D5.7	C47C12.2	F02D8.3	C15C8.8	C03H5.5	C33H5.10	C44C10.10	C24H12.11	C50F2.3	C36E8.3
B0024.3	C01B4.9	F13G3.6	F13B9.6	K01A2.3	F53B3.5	F14B8.1	C46C11.1	C25B8.3	B0414.6	C02F5.9	C07G3.9	C27A7.5	C24H11.6	C18E3.2	F56A12.1	K08F4.1	C10G11.10	C09F5.1	C15C7.4	C05C8.8	C02D5.1	B0344.2	B0334.11	C02F12.5	C05D10.3	C08F1.10	C25B8.4	F33E2.5	C10G8.6	C34G6.6	F59A3.1	C30A5.7	C03E10.3	C03A7.11	C06C3.12	B0432.13	D1005.2	F12F6.6	F35D11.5	C33D12.1	C47E8.7	F07A11.4	C15H9.3	C04A11.1	C34E10.2	C44C8.7	C24H12.8	C50H2.5	C37E2.4
B0024.4	C01F1.6	F16H6.11	F13D12.2	K01A2.4	F53F1.2	F14F3.1	C46H11.11	C26E6.5	B0416.4	C03C10.3	C08A9.7	C27C12.1	C24H12.8	C18E9.10	F56D2.2	K09A11.2	C10G11.7	C09G5.8	C15C8.2	C05D10.2	C02E7.2	B0348.2	B0334.13	C02F4.2	C05D12.4	C08F8.5	C25D7.7	F35G12.2	C12D5.2	C36B1.9	F59A3.4	C32D5.7	C03G6.16	C03B1.10	C06G8.2	B0432.2	D1046.3	F14B4.1	F38A1.10	C34F11.9	C48A7.1	F07A5.3	C16C10.9	C04F5.3	C35A5.8	C44E4.4	C25A1.1	C52B9.8	C38C10.5
B0024.6	C01F6.1	F16H6.7	F13H8.7	K07C11.4	F56B3.2	F19H8.5	C46H3.3	C27C12.1	B0432.1	C03C10.4	C08E3.3	C27H5.3	C25F6.3	C23H5.1	F58F6.4	K09E4.2	C10H11.3	C10A4.10	C16B8.2	C05D12.1	C02E7.3	B0348.5	B0334.2	C03A7.5	C05D12.5	C08F8.8	C25F6.3	F35H10.11	C12D5.8	C37A5.9	F59B1.8	C32F10.4	C03G6.17	C03B1.13	C07A9.8	B0432.4	D1053.1	F14E5.2	F38E11.3	C34H3.1	C48E7.6	F07A5.4	C16C2.3	C04G6.11	C35D10.7	C46A5.9	C25A1.16	C52E2.3	C38D4.3
B0024.8	C01G10.7	F17E9.10	F15E6.6	K07E3.3	F59F3.1	F21A10.2	C47D12.7	C27F2.1	B0432.13	C03C10.7	C08E3.6	C28G1.4	C25G4.10	C24G6.8	H23N18.2	M03C11.7	C11G6.2	C10E2.3	C17E4.9	C05D12.3	C02E7.5	B0361.10	B0336.11	C03B1.14	C05D9.5	C08G5.2	C26E6.2	F35H8.4	C12D5.9	C37C3.7	H17B01.1	C33A11.1	C03G6.2	C03G6.19	C07E3.2	B0432.8	D1086.12	F14F9.5	F38E11.6	C34H3.2	C48G7.3	F09C12.6	C16D9.3	C05B10.1	C35D6.4	C46E10.4	C25A1.6	C54E4.1	C39B5.2
B0024.9	C01G5.8	F17E9.9	F16H6.7	K09H11.1	H02I12.4	F21H7.14	C48A7.1	C29A12.6	B0432.2	C03C11.2	C08F1.8	C29F7.6	C25G6.5	C24H11.6	JC8.7	M03D4.1	C13B9.2	C10F3.2	C17E7.8	C05D2.1	C02E7.6	B0361.4	B0348.5	C03G6.11	C05E11.1	C09E7.7	C26E6.3	F36D1.1	C13B9.3	C37E2.2	H38K22.5	C34C12.6	C03G6.5	C03H5.4	C07H6.8	B0454.1	EGAP9.3	F16B4.1	F38E9.4	C35A11.2	C52E12.4	F09G2.5	C16D9.4	C05B5.7	C36B1.14	C46E10.9	C25B8.1	C55A6.10	C39E9.12
B0025.1	C01G6.5	F21A9.2	F21A9.2	K11G12.6	H06I04.1	F21H7.4	C48G7.3	C29E6.2	B0432.4	C03D6.5	C08F8.5	C30C11.4	C26E6.11	C25B8.4	K01G5.2	M106.1	C14C6.1	C10F3.3	C17G1.7	C05D9.2	C02F12.7	B0361.8	B0361.4	C03G6.13	C05E4.1	C09E7.9	C26E6.6	F39B3.2	C13G5.1	C42D8.8	K02B2.6	C34D4.1	C04C3.2	C04A11.5	C08B6.1	B0464.6	F07F6.2	F17C8.4	F39C12.1	C36B7.2	C53C11.3	F11A10.6	C16E9.2	C05B5.8	C36C9.2	C47F8.1	C25D7.3	C55B6.2	C40H1.6
B0025.2	C01G6.6	F22A3.5	F23B12.4	K11G9.4	H14E04.1	F21H7.5	C52E12.2	C30A5.2	B0432.8	C03D6.6	C09B8.5	C30F12.1	C26E6.8	C25F6.1	K02F3.2	M142.5	C15H11.3	C10H11.1	C17G10.5	C05E11.5	C02F4.4	B0365.6	B0361.9	C03G6.2	C05E4.12	C09F9.1	C28C12.7	F39G3.1	C14A11.3	C44B9.4	K03A1.2	C34E11.1	C04C3.6	C04A2.1	C08B6.2	B0464.8	F07F6.4	F18A1.2	F40H3.4	C36F7.4	C53D5.2	F11E6.2	C17E4.10	C05C9.2	C37C3.9	C49D10.11	C26C6.1	C55B7.9	C41H7.1
B0025.4	C01G8.1	F22B8.7	F32B5.8	K11H3.3	H19M22.3	F25B5.7	C53C11.3	C30A5.3	B0457.1	C03H5.7	C09H6.1	C31C9.4	C26E6.9	C25G6.5	K03A1.6	R02F2.7	C15H9.6	C11E4.1	C18B2.2	C05E11.7	C02H7.2	B0365.7	B0365.6	C04C3.7	C06A1.6	C09G12.9	C31C9.1	F39H11.5	C14A4.3	C44F1.1	K06A1.3	C34H3.1	C04C3.7	C04E12.5	C08F1.4	B0464.9	F07H5.13	F18A1.3	F41E6.8	C37C3.6	C54C6.2	F11E6.9	C17F4.2	C05D10.1	C38C10.2	C50E10.4	C26D10.2	cTel55X.1	C41H7.2
B0025.5	C01G8.3	F22E5.3	F32H2.5	M01D1.2	H38K22.5	F28F5.3	C54C6.2	C30G12.6	B0464.1	C04A2.7	C10A4.5	C31C9.8	C27A7.5	C26D10.2	K03E5.3	R03E9.3	C16C4.5	C11H1.9	C18B2.5	C05E4.3	C03B1.2	B0379.1	B0379.1	C04C3.9	C06A5.5	C09G4.4	C32B5.1	F41G3.14	C14B1.1	C44H4.3	K07C11.1	C35C5.5	C04F5.9	C04E6.6	C08F11.13	B0491.5	F08B12.2	F20B10.1	F43D9.2	C37H5.13	C54G7.4	F13D2.4	C17G1.7	C05D10.4	C38C6.4	C52D10.6	C26E6.8	D2005.1	C41H7.4
B0034.1	C01G8.6	F26D10.12	F35C8.4	M03A1.8	H41C03.1	F32A11.7	C54G7.4	C31H1.7	B0464.4	C04C3.3	C10E2.4	C31G12.1	C28A5.6	C27A7.1	K04H4.6	R04A9.4	C16C4.6	C13C4.5	C18C4.9	C05G5.1	C03F11.2	B0379.4	B0379.4	C04E12.12	C06A6.2	C10A4.8	C32C4.1	F42A6.6	C14B9.2	C45B11.6	K07C11.4	C36A4.3	C04H5.3	C04E6.8	C08F11.17	B0495.2	F08G2.4	F20B6.8	F47C12.1	C38C3.5	C56C10.11	F13G3.3	C18B12.3	C05E7.1	C39E9.11	C52E2.6	C27B7.4	D2013.3	C43E11.9
B0034.3	C01H6.5	F32H2.6	F35G2.4	M03D4.4	K02E10.4	F32A7.5	CD4.11	C32B5.7	B0464.6	C04F12.5	C10E2.5	C32B5.14	C29A12.3	C27C12.1	K09H9.2	R05H10.2	C16C8.11	C13E3.1	C18E9.5	C05H8.1	C03H5.1	B0391.11	B0391.11	C04F12.7	C06A8.5	C10C5.3	C33A11.2	F42F12.3	C14C10.4	C47F8.2	K08E5.3	C37A5.1	C05C10.7	C04F12.1	C08H9.1	B0495.6	F09E8.2	F20C5.5	F47C12.2	C40H5.5	C56C10.13	F15A2.6	C18C4.5	C05H8.1	C44B9.3	C53A3.1	C27H5.3	D2045.1	C44H4.7
B0034.4	C02B10.1	F33H2.1	F35H8.6	M142.5	K08H10.3	F36H1.3	D1044.2	C32C4.3	B0464.8	C04F12.9	C13B7.5	C32B5.16	C29E4.2	C27H6.4	M05B5.5	R06C1.1	C17C3.10	C13G3.2	C18E9.9	C06B3.8	C04C3.6	B0393.9	B0393.9	C04F2.4	C06E1.1	C10C5.5	C33D3.1	F44A6.3	C14C11.3	C48B6.4	K10B4.2	C37C3.6	C05D11.4	C04F12.8	C08H9.7	B0511.13	F10G2.9	F20G2.2	F47F6.1	C41G7.5	C56E6.6	F17B5.6	C18C4.7	C06A5.11	C44B9.4	C53C7.3	C28A5.4	D2085.2	C45G9.7
B0034.5	C02B10.2	F35H10.11	F38A6.1	M176.11	K09E2.3	F37H8.5	D2085.5	C32D5.12	B0464.9	C04F5.8	C13B9.2	C32B5.17	C29F7.2	C27H6.8	M142.4	R07C3.5	C17C3.7	C14A11.2	C18F10.8	C06B8.2	C04F12.12	B0399.1	B0399.1	C05B5.5	C06E2.5	C11H1.4	C33H5.9	F44E7.2	C15F1.6	C50F7.10	K11D12.11	C42D8.5	C05D12.7	C04F12.9	C09G5.1	B0511.9	F10G7.5	F21A9.1	F48B9.8	C43H6.1	CD4.11	F19H8.3	C18G1.1	C06A5.7	C44E4.3	C53D6.6	C28G1.4	D2085.4	C48B6.2
B0034.7	C02F12.8	F38A5.2	F39B1.1	M199.2	K11G9.4	F41G4.2	D2089.4	C33B4.4	B0495.2	C04G2.9	C13F10.5	C32B5.4	C29F7.6	C29F7.2	M142.5	R08F11.1	C17C3.8	C14A4.12	C23H5.3	C06C6.4	C04F5.2	B0399.2	B0403.3	C05C10.3	C06G1.4	C13G5.1	C34E7.4	F45E1.4	C17D12.2	C52D10.12	K12H4.1	C43C3.3	C06B3.8	C04F5.7	C09H5.4	B0513.2	F11A6.1	F22B7.10	F48F7.1	C43H6.8	CD4.5	F19H8.4	C18H9.1	C06A8.8	C44E4.5	C56E6.7	C29A12.3	E01B7.2	C50B8.3
B0035.1	C02F5.4	F39G3.1	F39G3.1	R03H10.2	K12G11.3	F43D9.1	EGAP7.1	C33F10.13	B0511.13	C05C10.1	C13F10.7	C32B5.6	C31C9.2	C31C9.1	M163.1	R12E2.1	C17G1.2	C14H10.3	C23H5.7	C06C6.5	C04F5.3	B0403.3	B0403.5	C05C12.1	C06G3.1	C14C10.4	C34F11.9	F45E4.2	C17E7.13	C53A5.6	M03A1.1	C43E11.6	C06B8.9	C04G2.1	C11E4.2	B0524.6	F11A6.2	F22D3.2	F48F7.3	C47D12.7	D1044.2	F20B6.3	C18H9.8	C06C3.10	C45G3.3	D1007.7	C29E4.12	E04A4.1	C50E10.6
B0035.10	C02F5.9	F40F8.11	F40G9.6	R05H10.2	LLC1.1	F44E2.4	F07A11.2	C33G3.3	B0511.7	C05C10.5	C14A4.4	C32F10.6	C31H2.4	C31C9.2	M163.3	R166.2	C18A11.5	C15C7.4	C24B9.9	C06C6.7	C04F6.2	B0403.5	B0403.6	C05C12.3	C07A12.3	C14F5.1	C34H3.2	F47G4.6	C17H11.2	C53D5.1	M110.1	C43F9.8	C06C3.9	C04G6.1	C12C8.3	B0546.1	F11C1.5	F22D3.6	F49E11.1	C48D1.5	D1044.5	F22A3.2	C23H4.2	C06C3.3	C45H4.14	D1009.2	C29E4.2	EEED8.15	C50F4.4
B0035.11	C03A3.2	F40H3.6	F41E6.6	R06B9.6	M04F3.5	F45E10.1	F07A11.4	C34C12.6	B0513.2	C05C10.7	C15C6.3	C33A12.12	C32B5.14	C31H2.4	R04A9.4	R166.4	C18D1.1	C16D9.2	C24G6.2	C06E1.4	C04G6.1	B0403.6	B0410.3	C05E11.6	C07A12.7	C15B12.1	C35B8.2	F49B2.3	C17H12.13	C54D1.4	M28.1	C44B12.2	C06E1.9	C05A2.1	C12D5.4	B0546.2	F12F6.3	F25C8.2	F52B10.2	C48E7.1	D2085.5	F22F7.3	C24H10.2	C06C6.4	C46F11.2	D1046.1	C29F7.2	F08B4.5	C54F6.8
B0035.12	C03D6.4	F43G9.11	F42G9.2	R10E4.2	M88.6	F46C3.3	F08B4.2	C35A5.2	B0523.3	C05D11.1	C15F1.5	C33C12.5	C32B5.16	C32B5.15	R07B1.1	T02H6.9	C18D11.4	C16D9.4	C24G7.4	C06E2.1	C04H4.1	B0416.3	B0416.3	C05E4.9	C07B5.5	C15H9.7	C35C5.4	F49E12.1	C18E9.6	C54F6.13	R02F2.2	C44C1.1	C06E8.3	C05C12.4	C12D5.5	B0564.11	F13B9.1	F26D11.11	F52F10.1	C50B6.14	D2092.5	F23H12.5	C25F6.6	C06C6.5	C46F11.4	D1081.6	C29F7.6	F08F1.5	C55B7.8
B0035.13	C03D6.5	F44C4.5	F43C9.4	R119.5	R05D3.9	F46G10.5	F08C6.1	C35E7.4	B0524.6	C05D11.11	C16A3.10	C34C12.4	C32B5.17	C32D5.5	R07C3.5	T05A7.3	C23H5.1	C17E4.1	C25A1.2	C06E4.7	C04H5.3	B0416.7	B0416.7	C05H8.1	C08E3.6	C15H9.8	C35D10.9	F49E12.6	C23H3.1	D1005.1	R03E1.3	C44E12.1	C06G3.1	C05C12.6	C12D8.13	B0564.2	F13H8.9	F27D9.6	F52G3.1	C50B6.8	F01G12.5	F25B3.1	C25F6.7	C06E1.3	C47G2.5	D1086.19	C31C9.2	F08F8.8	D1037.4
B0035.14	C03E10.4	F44E5.3	F43G6.11	R12H7.2	R05H11.2	F46H5.4	F10F2.1	C38D4.6	B0546.2	C05D11.7	C16C4.6	C34D10.1	C32B5.5	C32F10.2	R07H5.8	T06E6.1	C24H11.1	C17E7.1	C25F6.7	C06E8.3	C05B5.5	B0432.5	B0432.14	C06A5.11	C08F1.3	C16A3.6	C35E7.10	F52C12.2	C23H4.1	D1005.2	R05D3.9	C44H4.1	C06G3.3	C05C8.1	C13C4.6	B0564.7	F14F3.3	F28B12.2	F52H2.6	C50F2.8	F07B7.12	F25F8.1	C25H3.15	C06E1.4	C50A2.2	D2045.6	C31C9.4	F08G12.3	D1054.1
B0035.15	C03H5.2	F44E7.2	F44C4.5	R13H8.1	R07D5.2	F47C12.1	F10G7.10	C39E6.4	B0546.4	C05D12.4	C16C8.11	C34E10.7	C32B5.7	C33H5.12	R08E3.3	T07C4.2	C24H11.2	C17H12.9	C26B9.7	C06G1.1	C05C12.3	B0454.8	B0432.5	C06A5.7	C08F1.6	C16H3.3	C35E7.6	F52E1.9	C23H4.3	D1007.15	R05F9.1	C46A5.8	C07A12.3	C05C8.8	C13E3.1	BE0003N10.1	F17C8.9	F28F9.1	F53A3.1	C53A5.2	F07C6.1	F25H2.3	C26B2.5	C06E1.7	C50A2.4	D2085.1	C31C9.8	F10B5.7	D2030.11
B0035.16	C04A11.4	F45D11.10	F44E7.2	R148.5	R09F10.4	F47C12.2	F11A1.2	C40A11.3	B0563.1	C05D12.5	C16C8.14	C34G6.4	C33C12.5	C34E10.10	R08F11.1	T09B4.8	C24H11.3	C18B2.6	C26D10.5	C06G1.5	C05C9.3	B0457.2	B0457.2	C06A8.7	C08F1.8	C17E4.2	C36B7.6	F52H2.2	C24A11.8	D1044.2	R07C12.2	C46H11.4	C07F11.2	C05D11.12	C14C10.2	BE0003N10.2	F21A9.2	F28F9.2	F53A3.4	C53C11.5	F08B4.2	F26D10.11	C26B9.2	C06G1.1	C50D2.5	D2089.1	C31G12.1	F10C2.5	E02H1.6
B0035.18	C04A2.7	F47G4.2	F48B9.1	T02C1.2	R12C12.5	F47C12.6	F11A10.4	C42C1.15	B0564.1	C05D2.10	C16C8.16	C35C5.1	C33E10.10	C34E7.4	R13F6.1	T10H4.10	C24H12.10	C18C4.5	C27A7.4	C06G8.2	C05D12.3	B0457.6	B0457.6	C06A8.8	C08F8.4	C17G1.3	C36E8.3	F53A2.4	C24F3.1	D1086.12	R09D1.12	C46H3.3	C07G3.3	C05D11.6	C14C10.4	C01A2.4	F21G4.1	F28H6.6	F54D5.17	C53D5.3	F08F8.3	F26E4.3	C26B9.3	C06G1.2	C50F2.1	D2089.3	C32B5.14	F10G7.4	EGAP1.3
B0035.2	C04B4.2	F47G4.6	F49E8.5	T04F8.9	R12H7.2	F47F6.1	F11C7.4	C42C1.4	B0564.11	C06A1.6	C17C3.10	C35D6.3	C35E7.3	C35D10.13	T03F1.6	T12A7.1	C25B8.1	C18F10.8	C27H5.1	C07A9.10	C05D2.4	B0478.3	B0478.3	C06A8.9	C08F8.5	C17G1.4	C36F7.1	F53A2.9	C24F3.4	D2013.8	R102.5	C47C12.6	C07G3.6	C05D12.1	C14C11.3	C01F1.1	F22F7.2	F35H12.5	F56D1.5	C56G2.4	F09B9.2	F26E4.7	C26B9.6	C07A9.12	C53D5.6	D2089.5	C32B5.16	F10G8.6	F07B7.10
B0035.3	C04C3.3	F49E8.5	F52B11.3	T09B4.6	R148.5	F48E3.8	F13D11.2	C42D8.5	B0564.2	C06A5.9	C17C3.7	C35E7.1	C36A4.8	C35D10.9	T05E11.8	T13C2.6	C25F6.3	C24A3.6	C27H5.7	C07A9.13	C05E11.5	B0491.8	B0491.8	C06C6.4	C08F8.8	C17G10.4	C37E2.5	F54B11.4	C24G6.6	E04F6.5	R144.6	C48G7.3	C07H6.6	C05D9.9	C14C6.12	C01F1.6	F22F7.5	F36D1.1	F59F3.1	D1025.3	F10A3.11	F27D9.8	C26B9.7	C07C7.1	C54G10.2	DC2.7	C32B5.17	F11C1.1	F07B7.3
B0035.4	C04F12.1	F49E8.7	F52F12.6	T12G3.4	T01B10.5	F49E10.2	F13D12.9	C43C3.3	B0564.7	C06A6.4	C17C3.8	C35E7.3	C36B7.1	C35E7.6	T06E6.1	T14F9.5	C25G4.10	C24B5.3	C28A5.3	C07A9.5	C05E7.1	B0496.5	B0496.5	C06E1.5	C09B8.4	C18A3.8	C39F7.2	F54C9.1	C25B8.3	F01E11.1	R148.5	C50D2.6	C08E3.4	C05E11.4	C15A11.7	C01F6.1	F25B4.2	F38A1.9	H08J11.2	D1053.4	F10G7.10	F28B4.2	C26C6.8	C08B6.11	C54G4.9	DY3.2	C32B5.4	F13C5.2	F07B7.5
B0035.5	C04F12.5	F52E1.9	F52F12.7	T13A10.13	T01D1.5	F49E11.1	F13D2.1	C43E11.11	BE0003N10.1	C06C3.7	C17E7.12	C35E7.5	C38D9.1	C36A4.8	T07A9.13	T19H12.9	C26D10.2	C24B5.4	C29F9.4	C07G1.4	C06B3.16	B0511.5	B0507.6	C07B5.3	C09B8.5	C18C4.10	C40A11.10	F54D11.1	C25F6.2	F02C12.5	R31.1	C50F2.8	C08E3.5	C05E4.13	C15B12.1	C01F6.4	F25H2.1	F42G2.3	H14E04.1	D1069.2	F11D5.1	F28C1.2	C27A7.2	C08E8.1	C55A6.9	E01A2.8	C32B5.5	F13E9.3	F08B6.1
B0035.6	C04F5.1	F53B2.6	F52H3.1	T14B4.5	T01D3.3	F49E7.1	F14F7.1	C44B7.3	BE0003N10.2	C06C3.8	C17F4.6	C36E8.1	C38D9.7	C37A2.4	T07C4.2	T22G5.5	C26E6.8	C24G6.2	C30G12.1	C08B6.11	C06B3.8	B0513.5	B0507.8	C07C7.1	C09D4.2	C18D11.2	C41G6.8	F54D5.7	C26B9.1	F02E8.6	SSSD1.1	C52D10.1	C08E3.6	C05E4.3	C15B12.4	C01F6.8	F25H2.2	F43B10.1	H17B01.1	E04A4.6	F13D12.7	F28G4.2	C27D6.1	C08E8.5	CC4.3	E01G4.5	C32B5.6	F13H8.2	F08C6.2
B0035.7	C05C10.3	F53C3.7	F53B3.5	T19D7.6	T02C1.2	F52B10.1	F15B9.7	C44E4.5	C01B10.8	C06G3.2	C17G1.2	C38D4.6	C39E9.12	C37E2.4	T10B5.6	T23C6.4	C27A12.6	C25A1.2	C30H6.2	C08G5.4	C06C3.3	B0545.1	B0511.5	C07G1.1	C09E7.7	C18E3.3	C42D4.2	F56A12.1	C26E6.2	F02G3.1	T01D1.5	C52E2.4	C08E8.10	C05E7.2	C15B12.5	C01F6.9	F25H9.7	F45E10.2	H22D14.1	EGAP7.1	F14B8.5	F30F8.5	C29A12.6	C08F1.5	D1022.1	E02D9.1	C32D5.5	F14F4.3	F08G12.4
B0035.8	C05C10.5	F54A5.2	F53F4.12	T19H12.9	T03F6.1	F52B11.3	F15D3.1	C44H4.6	C01B4.9	C06G3.8	C18D1.1	C38D9.7	C41C4.8	C38C10.4	T10C6.12	T23F6.4	C27A12.7	C25B8.6	C30H6.4	C08G5.5	C06E1.4	B0554.1	B0513.5	C08B6.12	C09H10.8	C18G1.2	C44H4.2	F56B3.5	C26H9A.2	F09E5.5	T01D3.3	C53B7.1	C08F11.3	C05E7.4	C15B12.8	C01G10.8	F26A1.6	F45E6.3	H28G03.1	F02E8.3	F15B9.7	F31D4.5	C29F3.5	C09B8.1	D1054.14	EEED8.4	C32D5.9	F16B12.6	F08G2.2
B0035.9	C05C10.6	F54D5.7	F54F3.1	T22G5.5	T04F8.9	F52C12.5	F17B5.6	C44H9.7	C01F1.6	C06H2.1	C18D11.4	C39E6.4	C41G6.8	C39B5.2	T10E9.1	T25D1.1	C27A7.1	C25F9.9	C31H2.1	C08G5.7	C06E2.1	B0554.6	B0513.9	C08E3.1	C10A4.5	C23H4.4	C44H4.3	F56D1.2	C27A12.9	F10D7.5	T04C9.6	C54C6.2	C08F11.7	C05G5.4	C15C8.1	C01G5.5	F26F4.6	F49H12.5	H32C10.2	F07C6.4	F15D3.1	F32A7.3	C29F5.1	C09B8.6	D1054.15	EEED8.7	C32F10.2	F16G10.6	F08G2.3
B0041.1	C05C8.1	F55C5.5	F54G8.3	T23B5.3	T05A6.1	F56A3.5	F17C8.1	C45B2.7	C01F6.1	C06H2.7	C23G10.4	C40A11.7	C41H7.1	C39E9.12	T13C2.4	T26C12.3	C27C7.7	C26B2.3	C31H2.2	C08G9.2	C06G1.1	B0563.5	B0545.1	C08E3.13	C10C5.4	C23H4.6	C45B2.5	F56D1.3	C27C12.4	F10E7.4	T05H4.5	C54D1.6	C08F8.2	C06A1.2	C15F1.8	C01G5.8	F26F4.7	F52B11.3	H38K22.5	F08F1.7	F17C8.1	F32B4.8	C29F9.10	C09B9.8	D1081.8	EEED8.8	C33C12.5	F17E9.13	F09C8.2
B0041.2	C05C8.5	F55D10.3	F57B1.5	W07E6.1	T09B4.5	F56B3.2	F18C12.1	C46A5.3	C01F6.2	C07D8.6	C24D10.5	C41C4.8	C41H7.2	C39E9.13	T23C6.4	W03H9.2	C27H5.3	C26B9.3	C32E12.1	C08H9.15	C06G1.2	B0563.6	B0554.1	C08E8.1	C10C5.5	C24A8.4	C46C11.1	F57A8.1	C27H2.2	F10F2.1	T13C2.6	C54G7.4	C08G5.4	C06A12.3	C15H9.4	C01G6.5	F28C1.1	F54F2.6	H41C03.1	F09E10.6	F17E5.1	F32D8.3	C29F9.12	C09D1.1	D2005.4	F01F1.1	C34D10.1	F18E2.3	F09F7.3
B0041.3	C05C8.6	F56E10.1	F59B8.2	W08A12.3	T14F9.4	F57B9.2	F18E9.5	C46C2.7	C01F6.4	C07G2.3	C24H11.1	C41D7.1	C41H7.8	C41D11.5	T28C6.10	W04A8.1	C28A5.2	C26E6.2	C32E12.4	C09B7.1	C06G4.5	B0563.7	B0564.6	C08E8.5	C10F3.4	C24H12.1	C46C11.4	F57C2.5	C29E6.1	F11A6.1	T20B5.3	C55A6.5	C08H9.13	C06A12.5	C16A11.9	C01G6.6	F28H6.2	F54F3.1	K02B2.6	F09E10.8	F18C12.1	F32E10.3	C29G2.3	C09D1.2	D2005.7	F01G4.2	C34G6.4	F20C5.7	F10A3.17
B0041.4	C05D2.5	F57B9.5	F59D6.1	W10C8.2	T16G1.11	F58A3.1	F18F11.3	C46F11.2	C01G10.7	C07H6.5	C24H11.2	C42D4.6	C43D7.4	C41G6.8	VF39H2L.1	W07E6.1	C28A5.6	C27B7.7	C32F10.4	C09B8.1	C06H2.5	B0564.6	B0564.9	C08F11.1	C10G11.7	C24H12.11	C46C2.2	F59A7.4	C29F9.7	F11C7.4	T22E5.7	C56G2.4	C08H9.14	C06A5.10	C16B8.1	C01G8.1	F31A3.5	F54H12.4	K02D10.3	F10E9.6	F18E9.5	F32H2.11	C30E1.5	C09E7.5	D2092.2	F08B4.7	C35C5.1	F22B7.13	F10C5.1
B0041.5	C05D2.6	F58B6.1	H06O01.1	Y113G7A.6	T19C4.1	F58G11.2	F19H8.4	C47E12.2	C01G10.8	C08B11.5	C24H11.3	C43D7.5	C43D7.5	C41H7.1	W01B6.9	W07E6.2	C28G1.4	C27D8.2	C33A11.4	C09B8.6	C07A9.10	B0564.9	BE10.2	C08G5.6	C10H11.3	C24H12.7	C47E12.4	F59D12.4	C30A5.7	F13E6.4	T24D1.3	D1054.5	C09B9.1	C06B3.4	C16E9.1	C01G8.3	F31E3.1	F55B12.5	K02E11.11	F10G8.8	F18F11.3	F32H2.9	C30F12.1	C09E8.1	E01A2.2	F08D12.10	C35E7.3	F22E5.2	F10E9.4
B0041.6	C05D9.1	F59B1.8	H12D21.7	Y113G7B.16	W01F3.3	F59B10.1	F19H8.5	C48B6.9	C01G5.5	C08B6.9	C24H12.10	C43D7.9	C43D7.8	C41H7.2	W04B5.5	W10D9.4	C29E4.7	C27D8.3	C33A12.4	C09D4.1	C07A9.11	BE10.2	C01A2.7	C08G5.7	C10H11.5	C24H12.8	C49A1.4	H04D03.1	C30C11.4	F14B4.1	W03F9.4	D2092.4	C09D4.2	C06E2.1	C17B7.11	C01G8.6	F32A5.8	F56A11.3	K08E5.5	F11A10.4	F18H3.4	F33G12.5	C30F2.5	C09E8.2	E02H1.4	F09C3.3	C35E7.5	F23F12.9	F10E9.8
B0041.7	C06A1.1	F59B8.2	K02E7.6	Y116A8C.10	W03A5.4	F59F3.1	F20A1.7	C48E7.1	C01G5.8	C08F1.8	C25A1.1	C43E11.3	C44B9.6	C41H7.8	W05H9.1	Y113G7B.11	C29F7.2	C27F2.1	C33D9.1	C09E8.3	C07A9.13	C01A2.7	C01B10.3	C08H9.1	C11G6.2	C25B8.4	C50D2.7	H12D21.14	C30F8.4	F14B8.1	W06D12.3	E04A4.6	C09E7.8	C06E4.3	C17B7.12	C02B10.2	F35B3.5	F56A8.9	K10B4.6	F11C1.9	F19H8.5	F33G12.6	C30F8.3	C09F12.3	E04A4.4	F10B5.6	C36B7.1	F25B4.6	F11A10.7
B0041.8	C06A5.1	F59F3.5	K02E7.7	Y116A8C.3	W05G11.4	H39E23.1	F20B10.1	C49F5.6	C01G6.5	C08F8.3	C25G4.10	C44C8.7	C44C10.8	C43D7.2	W09C5.2	Y113G7B.16	C29F7.4	C27H5.7	C33H5.13	C09F12.3	C07A9.5	C01B10.11	C01B10.6	C08H9.5	C11H1.4	C25D7.3	C50F2.4	H12D21.15	C31C9.7	F14E5.2	W08D2.4	E04F6.9	C09E7.9	C06E4.7	C17B7.2	C02F12.8	F36D4.5	F56H9.4	K10D6.3	F11E6.4	F20A1.7	F35D2.5	C30G12.4	C09G1.4	E04F6.5	F10E7.5	C36B7.3	F25H5.5	F13A7.13
B0047.1	C06A5.6	H10E21.3	K02F3.1	Y11D7A.19	W08A12.3	K01A6.2	F20B6.3	C50D2.9	C01G6.6	C09E9.1	C25G4.4	C46C11.2	C45G3.1	C43D7.8	Y110A2AM.4	Y17G7B.9	C29F7.5	C28D4.9	C34D4.1	C09F5.1	C07G1.4	C01B10.3	C01B12.4	C09B7.1	C12D8.1	C25F6.3	C50H2.5	H12D21.7	C32D5.3	F14F7.5	W09D6.5	EGAP7.1	C09G4.2	C06E4.8	C17B7.5	C02F4.1	F37H8.1	F57A10.5	K10G6.4	F13E9.11	F20D1.2	F35D2.6	C31C9.3	C10E2.3	EEED8.3	F11A10.2	C37A2.2	F26A1.14	F13G3.11
B0047.2	C06A5.7	H12D21.7	K02F3.6	Y17G7B.21	W10C8.4	K02B9.4	F21G4.6	C50F4.14	C01G8.1	C09G9.2	C26E6.8	C46E10.4	C46H11.2	C43E11.9	Y18D10A.16	Y32B12B.2	C29F7.6	C29E6.2	C34E11.7	C09F5.3	C08B6.1	C01B10.6	C01B4.7	C09B9.1	C14F5.1	C26B2.1	C54D1.5	K02D7.1	C33D12.1	F14F9.5	Y17G9B.9	F01D4.8	C09G5.2	C06E7.2	C17B7.8	C02F5.4	F39D8.2	F57B10.5	K11H12.5	F14B6.6	F21C10.7	F36F12.3	C31H1.6	C10F3.6	F02E11.4	F11D11.12	C38C10.4	F26D11.1	F13G3.6
B0047.3	C06A5.8	K01A6.5	K06A1.3	Y17G9B.1	Y105C5A.1272	K02E10.4	F21H7.14	C51E3.6	C01G8.3	C09G9.6	C27A12.4	C47D12.4	C48E7.8	C43H8.2	Y39B6A.13	Y37E11AM.1	C30G4.3	C29E6.5	C34E7.1	C09G1.4	C08B6.11	C01B4.7	C01B7.7	C09D1.1	C15B12.1	C26C6.5	D1054.13	K02G10.6	C33D12.7	F14H12.8	Y37F4.6	F01E11.1	C09H10.8	C06E8.5	C17G10.6	C02F5.9	F39G3.7	F57B9.1	M02E1.3	F14F3.1	F21H7.14	F36H1.6	C31H2.1	C10G8.2	F02E9.9	F12F6.8	C38D4.5	F26G5.9	F14F3.2
B0198.1	C06A6.3	K02B12.1	K06A4.5	Y22D7AL.14	Y38H6C.16	K06A5.8	F21H7.4	C53B4.7	C01G8.6	C09H10.3	C27A12.6	C47F8.1	C49H3.6	C44C10.8	Y39G10AR.5	Y38E10A.14	C30G4.6	C30A5.7	C34F6.1	C09G1.5	C08B6.2	C01B7.5	C01B9.1	C09G1.2	C15B12.8	C26E6.3	D1081.2	K06C4.11	C33D9.6	F15B9.7	Y38F2AL.5	F02E8.1	C09H5.5	C06G4.2	C17G10.7	C03C10.4	F40E10.1	F59B2.8	M106.5	F15B9.8	F23H11.4	F40F12.4	C32E12.2	C10G8.7	F07A11.3	F13G3.10	C38D9.7	F28B12.3	F16B12.4
B0198.2	C06A6.4	K02D3.1	K07C11.4	Y37D8A.22	Y39A1A.9	K08A8.3	F21H7.9	C54C8.4	C01H6.5	C09H10.5	C27C7.7	C48B6.3	C50F2.2	C46C11.4	Y41D4A.3	Y39E4A.2	C31C9.8	C30B5.9	C35D10.12	C09G5.8	C08B6.5	C01B7.7	C01C10.2	C09G1.4	C15F1.5	C27A7.1	D2013.6	K06C4.3	C33F10.7	F15E6.6	Y39D8B.1	F08B1.3	C09H5.6	C06G4.5	C17G10.9	C03C10.7	F41E6.6	F59F4.3	M142.6	F15G9.1	F25E2.5	F40H3.5	C32E12.3	C11D2.3	F08A8.7	F14B6.1	C40A11.7	F28D1.10	F16B4.8
B0198.3	C06A8.4	K02E7.6	K07C11.7	Y38C1AA.4	Y41D4B.6	K08E5.3	F22G12.5	C54F6.4	C02B10.1	C09H6.3	C27H6.3	C48B6.9	C50H2.5	C46F11.3	Y43F8C.13	Y39F10C.2	C31G12.1	C31B8.7	C36A4.2	C09G9.3	C08E8.9	C01B9.1	C01C4.1	C09G12.11	C15H9.6	C27C12.1	D2013.8	K08E3.2	C34C6.5	F17C8.4	Y39E4A.2	F08C6.7	C09H5.9	C06G8.1	C18B10.6	C03D6.3	F46C5.8	F59F5.6	M6.3	F17E5.2	F25E5.6	F41C6.1	C32E8.7	C11D2.6	F08F3.6	F14D2.5	C41D7.1	F28D1.11	F16H6.11
B0205.1	C06E7.1	K06C4.11	K07E3.4	Y39E4B.6	Y45F3A.3	K10B3.10	F23B2.4	C56E6.1	C02B10.2	C10C6.1	C28A5.2	C48D1.1	C52A10.3	C47B2.5	Y47G6A.24	Y41D4B.10	C32B5.10	C31H1.6	C36E8.2	C09H5.2	C08F1.4	C01C4.1	C01C4.2	C09G4.2	C15H9.7	C28A5.4	D2045.9	K08H2.1	C34D10.2	F20B10.1	Y43E12A.2	F08F1.3	C10A4.10	C06H2.5	C18B2.6	C03D6.4	F46E10.9	H02I12.4	M88.6	F21F12.1	F26A10.2	F41E6.10	C33A12.3	C11D9.1	F09G2.8	F15D4.2	C41H7.8	F28D1.2	F18A11.3
B0205.10	C06E7.3	K06C4.12	K08B4.4	Y41D4B.7	Y47G6A.21	K10D3.4	F23F12.8	C56E6.5	C02F12.8	C10G11.1	C28A5.6	C49F5.3	C52D10.6	C49A1.3	Y49F6B.2	Y43F8B.22	C32B5.14	C31H2.1	C36H8.2	C09H5.5	C08G5.6	C01C4.2	C01C4.3	C09G5.4	C15H9.8	C28C12.7	D2096.12	K09E4.2	C34E10.3	F20C5.2	Y43E12A.3	F09F9.4	C10C6.1	C06H5.7	C18D4.8	C03D6.5	F47C12.11	H05C05.2	MTCE.4	F21H7.3	F27D9.3	F43C1.4	C33C12.1	C11E4.6	F10C2.4	F17A2.5	C42D4.6	F29B9.10	F18H3.1
B0205.11	C06G3.2	K06C4.3	K08H2.4	Y44E3A.6	Y50C1A.2	K12G11.3	F25H2.3	D1014.5	C02F5.13	C10G11.10	C28G1.4	C49F5.5	C52D10.8	C50F2.4	Y49F6C.4	Y43F8C.6	C32F10.6	C32D5.2	C37H5.2	C10C6.2	C09B7.1	C01C4.3	C01F6.6	C10C5.7	C16C4.5	C28G1.3	DC2.5	K09E4.3	C34F6.5	F21G4.1	Y45G5AM.6	F10C1.2	C10C6.2	C07A4.1	C18H7.13	C03E10.4	F48B9.1	H06I04.1	R02D5.1	F23B2.4	F28A12.2	F44G3.9	C33D9.6	C11G10.2	F10E9.3	F18A1.5	C42D8.3	F30A10.10	F18H3.5
B0205.12	C06G4.1	K06C4.4	K09A9.3	Y47D3B.10	Y53H1A.2	M03A1.1	F27D4.6	D1022.1	C02F5.6	C10G11.6	C29F7.4	C49H3.9	C52E2.1	C50H2.5	Y51H4A.1	Y46G5A.13	C33A12.12	C32D5.7	C38C6.2	C10F3.3	C09B9.8	C01F1.4	C01G12.2	C10G8.5	C16H3.1	C29F7.2	DY3.3	K11D12.11	C34F6.6	F22B7.10	Y50D4C.3	F11A10.4	C10F3.3	C07A4.2	C23H4.1	C04A2.7	F49E7.2	H06I04.2	R02F2.1	F23F12.8	F28B3.1	F46F11.11	C33D9.8	C12D12.5	F10G2.4	F19B10.1	C43D7.2	F32H2.2	F20D1.1
B0205.13	C06H2.3	K06C4.5	K09B11.2	Y47D3B.4	Y55D5A.1	M110.1	F28B3.1	D1081.2	C02F5.9	C10H11.8	C29F7.5	C50A2.4	C52E2.3	C52E4.3	Y53F4B.3	Y47G6A.6	C33C12.5	C32E12.4	C38C6.6	C10G8.5	C09E8.2	C01F1.5	C01G12.6	C11E4.2	C17C3.15	C30F12.1	EEED8.15	R03A10.6	C34F6.7	F22D3.2	Y50E8A.5	F11C1.7	C10G8.5	C07A9.9	C23H4.8	C04B4.2	F52H2.2	H06O01.2	R05D3.7	F26D10.9	F28F5.3	F47A4.3	C33G3.3	C12D8.21	F10G7.3	F19B10.9	C43D7.8	F35G12.8	F20D12.5
B0205.14	C06H2.6	K07A1.9	K09C8.5	Y47D3B.9	Y59A8B.9	M79.1	F28B3.4	D2013.2	C03A3.2	C11D2.4	C29F7.6	C50F4.6	C52E2.6	C55A6.2	Y53G8B.1	Y47H9C.8	C33E10.1	C33A12.6	C38D4.8	C10G8.7	C09E8.3	C01F4.2	C01G12.7	C11G10.1	C17E4.2	C31E10.7	F02G3.1	R05H10.2	C36B1.9	F22D3.6	Y53F4B.20	F11D5.1	C12C8.1	C07D10.2	C24B9.4	C04F12.5	F53A2.9	H06O01.3	R05D8.6	F26F2.8	F28H7.7	F48A11.1	C33H5.14	C13D9.1	F11A10.1	F19F10.1	C43D7.9	F35H10.1	F21A10.2
B0205.3	C07D8.6	K07B1.2	K09H11.1	Y50D4A.4	Y63D3A.3	R02D5.1	F28E10.1	E01A2.1	C03C10.3	C12D8.10	C30G4.3	C51E3.2	C52E2.7	C55B7.8	Y55D5A.6	Y48A6B.11	C34G6.4	C33C12.10	C38H2.3	C10H11.1	C09F12.3	C01G6.7	C01G6.7	C11G10.2	C17G1.2	C31H2.4	F07A11.2	R07B7.5	C37A5.9	F25B5.1	Y54E5B.1	F13B10.2	C13A2.11	C07D10.3	C25D7.4	C04F5.8	F53B3.5	K01A2.12	R06A10.3	F27C8.1	F29D11.1	F49B2.5	C34B2.1	C13F10.1	F11E6.7	F19F10.5	C43E11.10	F35H12.3	F21A10.4
B0205.4	C07G2.1	K07C5.4	K10B4.3	Y50E8A.1	Y71F9B.5	R03G8.6	F28F5.3	EGAP4.1	C03C10.4	C13B4.2	C30G4.6	C52D10.6	C53A3.1	C55B7.9	Y59A8B.10	Y48G9A.4	C35A5.2	C33D12.1	C39H7.4	C11E4.6	C09F9.3	C01G6.9	C01H6.1	C12C8.1	C17G1.3	C32B5.1	F07B7.4	R07C3.5	C37E2.5	F25B5.5	Y56A3A.7	F13C5.6	C13B9.4	C07E3.3	C25E10.1	C05C10.5	F53F8.1	K01A2.4	R10F2.1	F28B3.4	F30H5.3	F49E10.5	C34B4.1	C14A11.3	F12E12.1	F20B6.7	C43E11.3	F36A4.8	F22B5.1
B0205.5	C07G2.2	K08B4.2	K11G9.4	Y51F10.3	Y75B8A.6	R09E10.7	F28F9.1	F01D5.6	C03C10.7	C13B7.5	C31B8.12	C52D10.7	C54E4.1	C56E6.3	Y62E10A.11	Y49F6C.3	C35D6.3	C33D9.1	C40H1.7	C12C8.2	C09G1.2	C01H6.1	C02B4.4	C12C8.3	C18A11.5	C32B5.14	F07B7.5	R07H5.8	C38C3.5	F27D4.6	Y59A8B.7	F13D11.2	C13C12.1	C07G1.7	C25E10.4	C05C10.6	F54B11.5	K02B2.4	R148.3	F29F11.5	F32A7.5	F52B10.3	C34C12.5	C14A11.5	F12E12.4	F20B6.9	C44C10.5	F36D4.2	F22B5.7
B0205.6	C07H6.2	K08B4.4	K11H3.1	Y51H7C.10	Y80D3A.7	R10F2.1	F29D11.1	F01E11.4	C03C11.2	C13B7.6	C31B8.9	C52D10.8	C55A6.1	C56E6.7	Y67D8C.3	Y50D4C.2	C35D6.4	C33F10.5	C42C1.2	C12D12.1	C09G1.4	C01H6.2	C02B8.3	C12D12.1	C18D1.1	C32B5.15	F07F6.4	R09B3.1	C39B10.7	F27D9.6	Y60A3A.5	F13E6.4	C13C4.7	C07G3.10	C25E10.5	C05C8.4	F55A4.5	K02B9.4	T01D3.3	F31C3.6	F32F2.1	F53H4.5	C34C12.6	C14A11.6	F12E12.5	F22B5.2	C44C10.8	F36F2.4	F22D6.8
B0205.7	C07H6.5	K08E3.6	M03D4.4	Y51H7C.11	ZC247.3	R13H4.1	F30H5.3	F01G10.9	C03D6.5	C13B9.2	C31C9.4	C52D10.9	C56G2.5	D1022.1	Y71F9AL.7	Y52B11A.9	C35E7.1	C34B2.1	C42C1.7	C12D12.4	C09G5.1	C01H6.4	C02C2.1	C12D8.10	C18D11.2	C32B5.16	F08A8.1	R119.2	C39D10.3	F28A10.6	Y71A12B.12	F13E9.11	C13C4.8	C07H4.1	C26B2.6	C05C8.5	F55D10.1	K02F3.6	T04A11.7	F31D4.7	F33E11.1	F54B11.10	C35A5.10	C14A11.9	F13A7.14	F23F1.10	C45G7.4	F36H5.4	F22F4.5
B0205.8	C08B11.1	K08F4.1	M03F4.7	Y53F4B.18	ZC449.7	R31.1	F31C3.6	F02D8.3	C03D6.6	C13F10.5	C31C9.8	C52E2.1	D1025.2	D1037.3	Y71H2AM.17	Y54E5A.6	C35E7.3	C34B2.9	C42D8.4	C12D12.5	C09H10.8	C02A12.4	C02C2.4	C12D8.13	C18E3.4	C32B5.17	F08C6.3	R144.6	C39D10.8	F28B4.4	Y71D11A.1	F13H8.1	C14A4.4	C08A9.1	C27A7.1	C05D11.11	F56A11.7	K04B12.2	T04F8.9	F31D4.8	F33H1.1	F54D1.6	C35A5.11	C14A4.7	F13B12.1	F23H11.1	C47C12.3	F37H8.7	F23D12.5
B0205.9	C08B11.8	K08F4.2	M04F3.5	Y53F4B.4	ZK112.7	R53.3	F32A11.7	F07A5.1	C03E10.4	C13F10.6	C31G12.1	C55A6.2	D1044.1	D1037.4	Y73B6BL.9	Y54E5B.2	C35E7.5	C34B4.1	C42D8.5	C13B9.4	C09H5.5	C02B4.1	C02C2.5	C12D8.14	C18G1.2	C32B5.4	F08C6.4	T01B11.4	C39E9.14	F28F9.1	Y73F8A.34	F14B4.1	C14C10.3	C08A9.3	C27A7.9	C05D11.2	F57A8.3	K09G1.1	T06H11.4	F31E8.1	F35H12.2	F54G8.4	C35A5.5	C14B9.1	F13E9.6	F25B5.2	C47D12.4	F38B7.3	F25B4.4
B0207.1	C08C3.4	K08H2.4	M05B5.5	Y53G8B.1	ZK1290.8	SSSD1.1	F32A7.5	F07A5.3	C03H5.2	C13G5.2	C31H5.6	C55C2.1	D2021.1	D1044.1	Y74C9A.3	Y55D5A.6	C36C9.2	C34C12.6	C43E11.6	C13C12.2	C10G8.7	C02B4.4	C02C6.3	C12D8.17	C23H4.4	C32B5.7	F09C8.2	T02C5.3	C39F7.5	F28F9.2	Y80D3A.7	F14B8.1	C14C6.9	C08B6.10	C27D8.3	C05D2.10	H06O01.1	K10H10.12	T09F3.1	F32A6.2	F35H8.5	F55B12.1	C35C5.5	C14B9.3	F13G3.5	F25B5.7	C48B6.9	F39H11.3	F25G6.8
B0207.10	C08F8.2	K08H2.6	PAR2.3	Y55D5A.1	ZK484.3	T01C4.6	F32B4.8	F08C6.3	C03H5.3	C14A4.11	C32B5.10	C56G2.5	D2085.1	D2013.3	Y7A9D.1	Y59A8A.1	C36E6.1	C34D4.1	C43H6.6	C14A4.15	C10H11.1	C02B8.3	C02D4.1	C12D8.19	C23H4.6	C32C4.3	F10E7.8	T05A6.1	C40H5.5	F28H6.6	ZK112.7	F14B8.5	C14F11.3	C08D8.1	C29F4.3	C05D2.5	H20J18.1	K10H10.2	T09F5.1	F33A8.3	F36D4.3	F56F11.5	C37C3.2	C14C11.4	F14D2.11	F26A1.2	C48D1.1	F40F4.3	F25H5.6
B0207.11	C08F8.3	K09A11.2	R03E1.4	Y57A10A.28	ZK770.3	T01D1.2	F32E10.3	F08F1.6	C04A2.7	C14B1.1	C32F10.6	D1009.1	D2085.2	E01A2.1	Y82E9BR.1	Y59A8B.10	C37H5.14	C34E11.3	C43H6.8	C14A6.5	C11D2.2	C02C2.1	C02D5.1	C12D8.6	C23H5.1	C33A11.2	F10E9.6	T05E11.5	C41G7.5	F32D1.3	ZK1321.3	F14F7.1	C14F5.3	C08F11.5	C29F7.1	C05D2.6	K01A2.8	K11G9.4	T10E9.8	F33H2.8	F36H2.1	F56H1.1	C38C3.9	C14C11.8	F14H3.3	F26D2.9	C49C3.15	F40F4.4	F26A1.13
B0207.12	C09D4.4	K09C8.5	R03E9.2	Y59A8B.9	ZK867.1	T01D1.5	F35H8.5	F09B9.3	C04B4.2	C14B1.12	C33A12.12	D1025.2	D2089.3	E04A4.1	Y82E9BR.17	Y67D8C.3	C38C10.4	C35A11.2	C44B11.1	C14B9.1	C11D2.6	C02C2.4	C02E7.7	C13B4.1	C24A3.4	C33F10.13	F11A3.1	T07C5.1	C44B9.1	F32H2.5	ZK337.1	F16C3.2	C15H11.9	C08G5.6	C29G2.4	C05D9.1	K02D7.2	K12H4.1	T12D8.6	F35A5.8	F38E9.5	F56H11.2	C38D4.8	C14E2.7	F14H3.4	F28C6.1	C49H3.3	F42G2.6	F26A3.1
B0207.2	C09F5.2	K09H11.7	R06B10.1	Y63D3A.3	NA	T01D3.3	F38B6.4	F09E5.13	C04C3.3	C14B1.4	C34B2.8	D1044.1	D2096.1	E04A4.5	Y82E9BR.19	Y69A2AR.28	C38C6.4	C35A5.7	C44H9.6	C14C11.8	C11D9.1	C02C2.5	C02E7.8	C13B9.4	C24A8.3	C33G3.4	F11C1.6	T10H4.10	C44B9.4	F33G12.6	ZK783.1	F18G5.3	C16A3.4	C08G9.1	C30A5.2	C06A1.1	K02E10.1	M01D1.2	T14F9.4	F35D2.3	F39H12.4	F56H9.6	C38H2.2	C14F5.4	F14H3.5	F28D9.1	C50C3.6	F42G8.7	F26F4.13
B0207.3	C09G4.1	K10G9.3	R07B7.11	Y66A7A.3	NA	T04B8.5	F38E9.2	F09G8.8	C04E12.7	C14C10.5	C34D10.1	D1044.6	E01A2.5	EEED8.1	ZC132.6	Y71F9AL.6	C38D9.8	C35C5.5	C45B2.7	C14F11.5	C11E4.6	C02D4.2	C02F12.3	C14A6.12	C24H11.3	C33G8.9	F11C7.4	T12A7.1	C44C1.1	F35B3.5	NA	F19G12.3	C16A3.6	C08H9.15	C30F12.6	C06A5.1	K04G11.4	M02D8.4	T15H9.7	F37B1.8	F40E10.4	F57B9.7	C39B10.7	C15A11.3	F15B10.2	F28F8.3	C50F4.11	F43D9.6	F26H11.2
B0207.4	C09G4.3	K12H4.3	R07B7.5	Y69A2AR.29	NA	T04C10.1	F39H12.4	F10D11.2	C04F12.1	C14F11.1	C34G6.4	D1046.1	E01G4.5	EEED8.7	ZK1053.4	Y71H2AM.17	C40A11.7	C36B7.2	C45G3.4	C14F5.2	C11E4.8	C02D5.1	C02F12.5	C14C11.8	C24H12.1	C33H5.4	F11D5.3	T13A10.13	C44C1.2	F35G2.4	NA	F20D6.11	C16C10.10	C08H9.4	C30F2.4	C06A5.8	K06A1.3	M02H5.3	T19C4.1	F38A6.2	F41A4.1	F57C9.2	C39H7.4	C15A11.4	F15C11.2	F28H6.4	C50F4.5	F44E2.9	F27D4.2
B0207.5	C09G4.5	K12H6.1	R07C12.2	Y71A12B.15	NA	T05C12.10	F40E10.4	F10D7.2	C04F12.5	C15F1.6	C35A5.2	D1069.4	E02H1.3	EEED8.8	ZK131.2	Y73F8A.34	C41H7.1	C36B7.4	C45G9.13	C14F5.3	C11G10.2	C02E7.4	C02F4.5	C14C6.2	C24H12.10	C33H5.9	F13A7.13	T16G1.11	C44C1.4	F35H12.2	NA	F21A9.2	C16D9.7	C08H9.6	C30G4.4	C06A6.3	K07C11.4	M03A1.1	T21D12.7	F38E11.5	F41B4.4	F57H12.1	C40C9.2	C15A7.2	F17A9.6	F29A7.1	C50F4.6	F45H11.1	F27E11.3
B0207.6	C09G9.1	M01F1.9	R07C3.11	Y71D11A.1	NA	T08H4.1	F41G3.12	F11A5.10	C04F5.1	C15F1.7	C35D10.13	D2030.12	E03E2.1	F01G10.7	ZK131.3	Y75B7AL.1	C41H7.2	C37A5.1	C45G9.6	C14H10.2	C12D12.1	C02E7.7	C02G6.3	C15A11.7	C24H12.11	C34E10.7	F13B10.1	T17E9.2	C44E4.5	F35H8.6	NA	F22E10.5	C17C3.1	C09B8.8	C30G4.5	C06A8.2	K07C5.1	M03A1.7	T21G5.5	F38E9.2	F41G3.2	F58A4.14	C42C1.2	C15B12.7	F19B10.10	F29G9.1	C51E3.2	F46F6.1	F27E5.2
B0207.7	C09G9.6	M03A1.3	R07C3.14	Y71D11A.3	NA	T08H4.2	F42H10.5	F11C1.2	C04G2.6	C15H11.5	C35D6.3	D2045.6	E04A4.5	F07B7.10	ZK131.7	Y75B8A.30	C42D8.3	C37A5.11	C46A5.8	C14H10.3	C12D8.15	C02E7.8	C02H6.2	C15C7.4	C24H12.7	C34E7.4	F13D12.2	T19A6.3	C44F1.1	F37A4.4	NA	F23B2.4	C17D12.3	C09D4.1	C31E10.3	C06A8.4	K07C5.8	M03A8.2	T22D2.1	F39C12.3	F41G3.3	F58D5.3	C43G2.5	C15C6.1	F19B6.1	F31A9.4	C52A10.3	F46F6.2	F29B9.1
B0207.9	C09H10.10	M18.8	R07H5.2	Y71F9B.1	NA	T10H10.1	F43D9.1	F11E6.1	C04G6.4	C15H11.6	C35D6.4	D2085.1	EEED8.3	F07B7.3	ZK131.9	Y82E9BL.10	C43D7.2	C38C3.6	C46F4.2	C15A7.2	C13A10.1	C02F12.3	C03A7.14	C16A11.1	C25B8.1	C34F11.9	F14F3.1	T19A6.4	C44H4.2	F37H8.2	NA	F23H12.4	C17E7.6	C09E7.10	C31E10.8	C06E7.1	K07E3.1	M03D4.4	T27B1.2	F40A3.5	F42E11.3	F59F5.3	C43H6.6	C15H9.11	F19B6.2	F31E3.5	C52D10.7	F47A4.2	F29D11.2
B0212.1	C09H10.5	R06B10.1	R08C7.3	Y71F9B.8	NA	T13H2.4	F43E2.3	F11E6.2	C05C10.3	C16A11.4	C35E7.1	D2085.2	F07A11.5	F08F1.5	ZK896.9	Y82E9BR.17	C43D7.9	C38C6.6	C46H3.3	C15C7.5	C13A2.3	C02F4.5	C03A7.4	C16C4.8	C25B8.4	C34F6.4	F14F4.3	T21B6.4	C44H4.3	F39B1.1	NA	F25D7.3	C18D1.3	C09E7.3	C32H11.3	C06E7.3	K07H8.3	M04C9.3	T27C10.6	F41C3.11	F42H10.5	H01M10.2	C44B7.4	C15H9.2	F19F10.10	F31E3.6	C52D10.8	F48E3.6	F29G9.3
B0212.2	C09H6.3	R06B9.6	R09D1.12	Y71G12B.6	NA	T14B4.7	F43E2.9	F11E6.9	C05C10.5	C16A3.10	C35E7.3	DY3.2	F07E5.1	F08G2.1	NA	Y94H6A.5	C44B9.3	C38D4.8	C47C12.2	C15C8.1	C13B9.4	C02F5.14	C03B1.5	C16C8.2	C25D7.3	C34F6.9	F16B4.8	T21C12.2	C45B11.6	F39C12.3	NA	F26D10.9	C18D11.2	C09G9.5	C33G8.10	C06G3.11	K08A8.3	R01B10.4	T28F12.3	F41G3.12	F43C1.1	H06H21.10	C44C10.9	C15H9.9	F19F10.12	F31E9.4	C52D10.9	F48F7.4	F30A10.9
B0212.3	C10C6.1	R07B7.5	R11E3.4	Y71G12B.8	NA	T14F9.4	F44D12.1	F13D11.4	C05C10.6	C16C10.10	C36B7.1	E02D9.1	F07E5.2	F09C3.5	NA	ZC132.4	C44C8.7	C39E9.10	C47E8.9	C15C8.2	C14A11.7	C02G6.3	C03B1.6	C16E9.1	C25D7.5	C34G6.4	F16G10.13	T27A1.5	C46C2.2	F39G3.1	NA	F27C8.1	C18D11.6	C09H5.2	C33G8.11	C06G3.2	K08B12.5	R02F2.2	W01C8.1	F41G4.2	F43E2.3	H08M01.2	C44H4.4	C16B8.2	F20A1.9	F32D1.10	C52E2.1	F48F7.6	F31E8.3
B0212.4	C10C6.5	R07C3.10	R13F6.9	Y73B6BL.6	NA	T14G10.2	F44E2.4	F13D12.9	C05C10.7	C16C8.11	C36E8.5	E02H9.3	F07E5.6	F10B5.2	NA	ZC132.6	C45E1.1	C42C1.2	C48A7.1	C15H9.3	C14A4.15	C02H6.2	C03F11.1	C17E4.9	C25F6.3	C35B8.2	F16H6.11	T27A3.5	C46F11.6	F39G3.7	NA	F28B4.2	C18D4.3	C10C5.2	C33G8.4	C06G3.8	K09E9.2	R03H10.2	W02C12.3	F42A10.2	F43E2.9	H15N14.2	C44H4.5	C16C2.2	F20H11.2	F33E11.6	C52E2.7	F49B2.7	F32D1.1
B0212.5	C10C6.7	R07C3.11	R13H8.1	Y73C8B.2	NA	T19A5.2	F44G4.8	F13E9.1	C05C8.1	C16C8.16	C38C10.2	E03E2.1	F07E5.8	F10B5.5	NA	ZC434.6	C45G7.4	C42C1.7	C48B4.2	C16B8.2	C14B9.3	C02H7.2	C03F11.2	C17E7.10	C25G4.10	C35D10.8	F16H6.7	T27A8.2	C48B4.8	F40E10.1	NA	F28F5.3	C18E9.1	C10C5.7	C34B7.3	C06G4.1	K10B2.1	R05D3.9	W03A5.4	F42E11.2	F44A6.1	H30A04.1	C45G9.5	C16C8.2	F21D5.2	F33H2.5	C53A5.3	F49C12.10	F32D8.4
B0212.6	C10F3.1	R07C3.5	T01D1.2	Y75B8A.1	NA	T19B10.5	F45E10.1	F13E9.11	C05C8.4	C16C8.20	C38D9.8	EEED8.12	F08A8.7	F10B5.6	NA	ZK1053.4	C45H4.14	C42D8.5	C48E7.1	C16C8.2	C14C11.4	C03A7.5	C03F11.4	C17G1.1	C25G6.2	C35D10.9	F17C11.1	T27F7.2	C48E7.2	F40H3.6	NA	F28F9.1	C18F10.8	C10E2.2	C34C6.5	C06H2.1	K10B3.10	R07D5.2	W05B2.2	F43D9.1	F44C8.5	H34I24.3	C46A5.2	C16D2.2	F21H12.1	F34D6.1	C55A6.2	F49D11.10	F33A8.6
B0213.10	C10G11.6	R08C7.3	T02C1.2	ZK1236.2	NA	T20D3.11	F46C3.3	F13G3.3	C05D11.1	C16C8.5	C40A11.7	EEED8.4	F08D12.10	F10C2.5	NA	ZK1128.1	C46E10.4	C43C3.4	C48E7.6	C16H3.2	C14C11.8	C03B1.6	C03G5.7	C18A11.7	C25G6.5	C35E7.5	F17C11.17	T28B8.1	C49A9.6	F41C6.7	NA	F31C3.6	C18H2.2	C10G8.3	C34F11.3	C06H2.3	K10B4.2	R09F10.4	W06F12.1	F44E2.4	F44D12.1	K01A2.11	C46H11.9	C16D6.1	F22D6.6	F35E12.3	C55C2.1	F52E4.7	F33E2.5
B0213.11	C10H11.10	R08D7.3	T02C5.3	ZK265.4	NA	T27A10.6	F47C12.1	F13H10.3	C05D11.11	C17C3.10	C40H5.2	F01G10.8	F08D12.11	F10E7.5	NA	ZK228.3	C46E10.9	C43E11.6	C50H11.2	C17E7.8	C14C6.10	C03F11.1	C03G6.13	C18B12.1	C26B9.1	C35E7.6	F17E9.10	VW02B12L.3	C49C3.11	F41E6.6	NA	F31F6.6	C18H9.5	C10G8.8	C35A5.3	C06H2.6	K10B4.3	R10D12.8	W07A8.5	F45E6.2	F44E7.12	K02C4.4	C47F8.7	C16D9.1	F22H10.5	F35G2.3	C56E6.3	F53F8.6	F33H2.1
B0213.12	C12C8.3	R08F11.1	T02E9.5	ZK550.6	NA	T27C10.6	F47C12.2	F13H10.5	C05D11.12	C17C3.7	C41D11.7	F02A9.6	F08D12.3	F10G7.4	NA	ZK632.7	C46F11.2	C43G2.2	C52B9.5	C17F3.1	C14H10.2	C03F11.2	C03G6.15	C18B12.2	C26C6.1	C36A4.8	F17E9.13	W06D4.3	C50C3.7	F41E7.2	NA	F32A7.3	C23G10.6	C10H11.3	C35A5.7	C06H2.7	K10D6.4	R11G1.2	W08A12.3	F46C8.6	F44G4.8	K02G10.5	C48B4.13	C16D9.6	F23B12.6	F36A2.1	D2021.1	F53H8.1	F34D10.3
B0213.14	C12D8.11	R107.1	T03D3.1	NA	NA	T28F12.2	F47C12.7	F14B4.1	C05D11.2	C17C3.8	C41D7.1	F07A11.5	F08D12.6	F10G8.3	NA	ZK783.1	C47F8.1	C43H6.6	C52D10.3	C17F4.12	C14H10.3	C03G6.15	C03G6.19	C18B2.1	C26C6.8	C36B7.1	F18E2.3	W06H3.2	C50D2.10	F42A10.8	NA	F32A7.5	C23G10.7	C10H11.4	C35A5.9	C06H5.8	K11D12.11	R12B2.2	W09D10.1	F47E1.5	F45B8.4	K03A11.3	C48B4.3	C16D9.9	F23B2.13	F36A4.7	D2085.3	F53H8.4	F36D1.9
B0213.15	C13B4.1	R119.5	T03F6.1	NA	NA	W01C9.2	F47E1.5	F14F9.2	C05D11.3	C17E4.6	C41G7.1	F07E5.2	F08D12.8	F10G8.6	NA	NA	C49D10.11	C43H6.8	C52G5.2	C17F4.3	C15A7.2	C03G6.17	C03G6.2	C18B2.5	C26E6.8	C36B7.6	F18H3.3	W08A12.3	C50D2.7	F42A6.9	NA	F32B5.7	C23H3.3	C10H11.5	C36A4.6	C07A12.5	M01D7.2	R12C12.5	W09G3.3	F48E3.8	F45E10.1	K03E6.4	C48B6.8	C16E9.4	F23B2.6	F37A4.8	E02H1.3	F54B11.3	F36H9.8
B0213.16	C13B7.6	R13F6.9	T04A11.2	NA	NA	W01F3.3	F47F6.1	F15E6.10	C05D2.1	C17E7.12	C41H7.3	F07E5.6	F08D12.9	F11C1.6	NA	NA	C49D10.3	C43H6.9	C53A5.2	C17G1.7	C15B12.5	C03G6.19	C03H5.6	C18D11.9	C27A12.4	C36E6.2	F19B10.4	Y104H12D.3	C50D2.9	F44G4.8	NA	F32F2.1	C23H5.11	C11D2.2	C36C5.6	C07A9.3	M03F4.7	R12H7.2	Y105C5A.1272	F48E3.9	F45H7.2	K04F10.2	C49A1.10	C16H3.1	F23C8.6	F37B1.5	E04A4.2	F54E12.4	F37D6.3
B0213.17	C13B9.3	R144.6	T04A11.5	NA	NA	W02B8.3	F47G4.4	F17A9.3	C05D2.5	C17E7.4	C42D4.6	F07F6.8	F08F8.7	F11E6.1	NA	NA	C49F5.5	C44B11.1	C53C11.3	C17G10.5	C15C6.1	C03H5.6	C04A11.1	C18D4.3	C27A7.1	C36E8.3	F19C6.1	Y105C5B.1413	C50E3.5	F45E6.2	NA	F33H1.1	C23H5.2	C11E4.1	C37A2.6	C07A9.7	M04F3.5	R13D11.8	Y105E8A.24	F52B10.1	F46A9.5	K07C11.9	C49C3.5	C16H3.2	F23C8.9	F39F10.3	EEED8.12	F55A4.1	F37F2.2
B0213.2	C13G5.2	T02C5.3	T05E11.3	NA	NA	W02C12.1	F47G6.4	F17B5.6	C05D2.6	C17E7.9	C42D8.3	F08A8.2	F08G12.2	F13G3.6	NA	NA	C50A2.2	C44E12.1	C53D5.2	C17H11.1	C15C8.1	C04A11.1	C04A11.5	C18E9.7	C27H5.3	C36F7.1	F20G4.1	Y110A7A.14	C50F7.10	F46H5.4	NA	F33H2.8	C24A11.8	C11E4.3	C37A5.1	C07D8.6	M153.2	R144.12	Y105E8A.28	F52C12.5	F46C3.3	K08H2.8	C49F5.2	C17E4.9	F23F12.4	F40F4.1	F01G4.1	F55C5.9	F39B3.2
B0213.3	C14A4.11	T02G5.7	T05E11.5	NA	NA	W04G3.2	F48A11.1	F17E5.2	C06A1.1	C17H12.1	C43D7.2	F08D12.11	F09C12.8	F14H3.10	NA	NA	C50A2.4	C45B2.7	C53D5.3	C18A11.3	C15C8.2	C04A11.5	C04B4.4	C18F10.2	C28A5.4	C37E2.4	F21A10.2	Y116A8C.28	C53A5.6	F46H6.2	NA	F36H9.7	C24A8.1	C11E4.8	C37A5.4	C07G1.5	M28.1	R144.7	Y105E8A.9	F52E10.5	F46C5.6	K10G9.1	C49H3.1	C17E7.5	F25B4.5	F40F4.7	F02E8.5	F55C9.3	F43C11.6
B0213.4	C14B1.12	T04G9.5	T05E11.6	NA	NA	W05H5.3	F48F7.1	F17H10.2	C06A5.1	C17H12.13	C43D7.9	F08D12.6	F09C3.4	F16B4.8	NA	NA	C50F2.1	C46A5.8	C54C8.4	C18A11.7	C16A11.1	C04C11.1	C04C11.1	C18H7.1	C28C12.9	C37E2.5	F21A10.4	Y17G9B.7	C54D1.4	F47C12.2	NA	F38A1.10	C24B5.1	C11G10.1	C37H5.1	C07H6.2	R01B10.5	R160.1	Y106G6H.4	F52H2.7	F46C8.5	K12G11.6	C49H3.12	C17E7.8	F25B5.4	F40F9.6	F07E5.1	F55G1.2	F43G6.1
B0213.5	C14B1.2	T05E11.5	T07A9.9	NA	NA	W09B6.1	F49E10.2	F19H8.4	C06A5.11	C18A3.1	C44B7.10	F08D12.8	F09C3.5	F17A2.13	NA	NA	C50F4.11	C46F11.6	C54D10.14	C18B2.5	C16B8.2	C04C3.6	C04C3.6	C18H7.5	C28G1.3	C39B5.2	F21H11.3	Y19D10A.1	C54F6.13	F47C12.6	NA	F38A6.2	C24B9.12	C11G6.4	C37H5.8	C08B11.1	R03E1.4	R160.3	Y110A2AL.14	F53A9.4	F46F11.1	M01H9.2	C50B6.9	C17F4.11	F26A3.2	F40G9.10	F07E5.2	F56A3.3	F44B9.6
B0213.6	C14B1.9	T05F1.10	T08B1.3	NA	NA	Y104H12D.3	F49E11.1	F20A1.1	C06A5.6	C18D11.4	C44B9.3	F08D12.9	F09F7.6	F17A9.5	NA	NA	C52D10.6	C46F2.1	C54E4.2	C18C4.10	C16C8.2	C04C3.9	C04C3.9	C24A11.2	C28G1.4	C39E6.1	F22D3.2	Y34D9A.10	C54F6.9	F47C12.7	NA	F38E11.3	C24B9.16	C12D12.2	C38C3.10	C08B11.5	R03E9.2	R31.1	Y111B2A.11	F53B3.3	F47C10.4	M03B6.3	C50B8.6	C17F4.12	F26A3.8	F40G9.12	F07E5.6	F56A4.4	F44C4.5
B0218.1	C14C10.5	T07H6.2	T13A10.13	NA	NA	Y116F11B.2	F52B10.1	F20G2.3	C06A5.8	C18E3.5	C44E4.5	F08G12.2	F10C2.4	F17E9.13	NA	NA	C52D10.7	C46H11.11	C54G10.1	C18D11.7	C16D6.2	C04E6.13	C04E6.13	C24A11.5	C29F3.1	C39E6.4	F22F1.1	Y37A1B.8	C54G10.4	F47G4.3	NA	F38E9.2	C24F3.2	C12D12.3	C40H1.9	C08B11.6	R07B7.11	SSSD1.1	Y119D3B.17	F53C3.3	F47G4.4	M153.5	C52B9.10	C17F4.6	F26F4.1	F40G9.14	F07F6.8	F56B6.2	F44E2.6
B0218.2	C14C11.2	T08B2.7	T19D7.6	NA	NA	Y15E3A.1	F52E10.5	F21C3.4	C06A5.9	C18E3.6	C44E4.6	F08G5.5	F10D2.12	F17E9.9	NA	NA	C52D10.8	C46H11.4	C54G6.2	C18E9.5	C16D9.5	C04E6.7	C04E6.7	C24A3.1	C29F7.2	C39F7.2	F23B12.4	Y37B11A.3	C56A3.4	F47G6.1	NA	F38G1.1	C24G7.4	C12D5.7	C41A3.2	C08B6.8	R07H5.2	T01B10.5	Y18D10A.5	F53C3.4	F47G6.1	M60.5	C52E4.5	C17H11.1	F26F4.10	F40G9.19	F08D12.11	F56C4.1	F44F1.6
B0218.3	C14C11.6	T10C6.12	T20B3.1	NA	NA	Y16B4A.1	F52G3.1	F21D5.1	C06A6.3	C18E3.7	C45H4.14	F09C3.3	F10D2.8	F18C5.10	NA	NA	C52D10.9	C46H3.3	C54G7.4	C18G1.6	C17C3.4	C04F5.2	C04F12.8	C24B9.10	C29F7.6	C40A11.10	F23B12.6	Y37D8A.25	C56E10.1	F48B9.1	NA	F38G1.2	C24H12.4	C12D8.10	C44B11.4	C08B6.9	R10E11.6	T01D1.5	Y18H1A.3	F53C3.6	F48C1.3	R04B3.1	C53B4.7	C17H12.14	F26F4.11	F40H6.4	F08D12.6	F57C7.1	F45D11.10
B0218.5	C14C11.7	T10H4.10	T22G5.5	NA	NA	Y20F4.4	F54D1.6	F21H7.3	C06A6.4	C18F10.7	C45H4.17	F09C3.5	F10E7.1	F19B10.1	NA	NA	C52E2.1	C47C12.6	C56E6.6	C18H9.8	C17E7.5	C04F5.3	C04F5.2	C24B9.12	C30G4.3	C40A11.2	F23F12.9	Y38A10A.5	C56E10.4	F49B2.5	NA	F39C12.3	C25F9.5	C12D8.4	C44B7.9	C08C3.4	R148.5	T02C1.2	Y22D7AL.4	F53G12.1	F48G7.11	R05G9R.1	C53B4.8	C17H12.9	F26H11.1	F41E6.13	F08D12.8	F58A4.9	F45D11.5
B0218.6	C14F11.1	T12A7.1	T24A6.8	NA	NA	Y37F4.6	F54D12.5	F22D6.1	C06A8.1	C18G1.5	C46A5.6	F09F7.6	F10G7.4	F19H8.1	NA	NA	C52E2.6	C47E8.6	CD4.11	C23H3.9	C17E7.6	C04F6.2	C04F5.3	C24H10.5	C31C9.1	C40A11.3	F25B4.6	Y38F2AR.2	C56G2.1	F52B11.3	NA	F40H3.4	C25G4.2	C13A10.2	C44C10.11	C08F8.3	T02E9.5	T02G5.14	Y22D7AL.6	F53G2.4	F49A5.10	R07E4.4	C53B7.1	C18A11.3	F27B3.6	F42A6.7	F08D12.9	F58E1.8	F45E12.3
B0218.7	C15C8.4	T13A10.10	T25G12.11	NA	NA	Y38C1AA.5	F54D12.6	F22F7.3	C06A8.2	C23G10.1	C46A5.9	F10D2.12	F10G8.6	F22B7.13	NA	NA	C53A3.1	C48A7.1	cTel54X.1	C23H4.2	C17E7.8	C04G6.1	C04G6.1	C24H11.8	C31C9.2	C40A11.4	F26D11.11	Y39G10AR.8	D1005.1	F52D2.7	NA	F41C3.11	C25H3.1	C13A2.1	C44C10.3	C08H9.16	T04B8.5	T02H6.6	Y22D7AL.9	F54C8.6	F49E10.2	R08D7.7	C53C9.2	C18A11.7	F28H6.8	F42A6.8	F08G12.2	F58G6.1	F45E4.11
B0218.8	C15F1.3	T13A10.11	T27A1.5	NA	NA	Y38F2AL.1	F54F3.1	F22F7.6	C06A8.4	C23G10.2	C46E10.4	F10D2.8	F12E12.10	F22B7.9	NA	NA	C53C7.3	C48B4.3	D1009.5	C23H4.7	C17F4.3	C04G6.10	C04G6.10	C25F9.2	C31C9.4	C40A11.6	F26F4.4	Y39G10AR.9	D1005.2	F52H3.1	NA	F41F3.2	C25H3.10	C13A2.12	C44H9.5	C09D4.4	T04F8.2	T03F1.8	Y23H5B.8	F54E2.2	F52C9.5	R12E2.9	C53D6.2	C18A3.10	F29G9.5	F42E11.1	F09C3.4	F59A2.5	F45E4.2
B0222.1	C15F1.6	T22G5.5	T28A11.22	NA	NA	Y39H10A.4	F54G8.5	F23B2.4	C06E7.1	C23G10.4	C46E10.9	F10D7.5	F12E12.8	F22E5.20	NA	NA	C53H9.2	C48D5.2	D1037.2	C23H4.8	C17G1.7	C04G6.11	C04G6.11	C25G6.3	C31E10.7	C41D11.1	F28C6.3	Y41D4B.10	D1007.15	F53B3.5	NA	F41G3.12	C26D10.3	C13A2.3	C45B2.4	C09E9.1	T05A6.1	T04C9.6	Y37D8A.22	F54F2.2	F52D10.3	R31.3	C53D6.8	C18A3.4	F29G9.7	F44E5.2	F09C3.5	F59A6.5	F45F2.13
B0222.10	C15F1.7	T24B8.6	W03H9.1	NA	NA	Y40A1A.1	F55D10.1	F23H11.1	C06E7.3	C23H3.3	C46F11.2	F10E7.1	F13A2.4	F22F1.1	NA	NA	C55A6.5	C48E7.1	D2005.6	C23H5.2	C18A11.2	C04G6.5	C04G6.5	C25G6.4	C31G12.1	C41D11.6	F29B9.2	Y45F10D.11	D1022.1	F54A5.3	NA	F42G2.3	C26F1.10	C13A2.4	C45B2.6	C09F5.2	T05E11.3	T04G9.4	Y37E11C.1	F55A11.5	F53C11.5	T01E8.3	C54E10.5	C18A3.6	F30A10.5	F44F1.4	F09F7.6	F59E10.3	F45G2.9
B0222.11	C15H11.4	T25D1.1	W05H9.4	NA	NA	Y41D4B.17	F55F8.1	F23H12.5	C06E8.3	C24D10.5	C46F11.4	F10E9.11	F13A7.13	F23C8.4	NA	NA	C55C2.1	C48E7.5	D2030.10	C24A1.2	C18A3.4	C04G6.7	C04G6.7	C26B2.3	C31H2.4	C41H7.1	F29C4.8	Y46B2A.1	D1044.2	F54E7.3	NA	F43B10.1	C27A7.8	C13A2.5	C45G9.13	C09G4.3	T06E6.3	T05G5.1	Y37H9A.3	F55C7.7	F53E2.1	T01G9.3	C54G10.1	C18B12.1	F30F8.8	F44F1.7	F09G2.4	H20J04.6	F47B7.2
B0222.2	C15H11.6	T25G12.11	W08D2.4	NA	NA	Y42H9AR.1	F55H12.3	F25F8.1	C06G3.2	C24F3.4	C47F8.1	F10E9.3	F13G3.6	F23F12.9	NA	NA	C55C2.3	C48E7.6	D2063.1	C24A3.2	C18B12.2	C04H4.1	C04H4.1	C26F1.1	C31H5.4	C41H7.8	F29D10.4	Y46G5A.2	D1046.7	F54F2.1	NA	F43D9.1	C27B7.7	C13A2.6	C46C11.2	C09G4.5	T07A9.14	T06E6.15	Y38C1AA.1	F55F8.1	F54D8.1	T02C12.1	C54G7.1	C18B12.5	F31A3.2	F45C12.11	F09G2.9	JC8.4	F49D11.9
B0222.3	C15H11.7	T28A11.22	W10C8.2	NA	NA	Y47G6A.17	F56H9.6	F25H2.3	C06G3.8	C24H11.1	C48B4.6	F10G8.7	F14B6.1	F25B4.4	NA	NA	C56G2.5	C48G7.3	D2085.7	C24A3.6	C18B2.5	C04H5.8	C04H5.8	C26F1.10	C32B5.14	C42D4.2	F31E3.1	Y46H3A.7	D2013.6	F54F3.1	NA	F44G3.9	C27H5.2	C13A2.7	C46F4.2	C09G9.1	T07D3.4	T08H4.3	Y38C1AB.8	F56A3.5	F54E4.1	T02G5.2	C54H2.5	C18C4.1	F31A3.4	F45C12.14	F10D2.12	K01G5.1	F52A8.5
B0222.4	C16A11.10	T28B8.1	Y102A11A.6	NA	NA	Y48C3A.17	F57A8.1	F26D10.11	C06G4.1	C24H11.3	C48B6.9	F11C3.1	F14B6.3	F26D10.12	NA	NA	D1009.2	C49A1.10	E02H4.4	C24B9.9	C18B2.6	C05A2.1	C05A2.1	C26F1.2	C32B5.15	C42D4.6	F31E8.3	Y48G10A.1	D2013.8	F54G8.3	NA	F45H10.5	C27H6.3	C13A2.9	C46F9.1	C09G9.2	T09A5.4	T10D4.5	Y39B6A.11	F56B3.2	F54G8.5	T03G11.3	C55A1.7	C18D1.4	F31E3.3	F45C12.5	F10D2.8	K01G5.10	F53B2.6
B0222.5	C16A11.4	W03F11.6	Y119D3B.18	NA	NA	Y48E1C.1	F57F5.2	F26E4.3	C06H2.3	C25A1.12	C48D1.1	F11H8.1	F14E5.4	F26F4.8	NA	NA	D1022.1	C50D2.6	F01D4.6	C24G6.2	C18C4.2	C05A9.1	C05A9.1	C26F1.7	C32B5.16	C43D7.5	F32H2.5	Y48G8AL.7	D2030.2	F55A8.1	NA	F46C5.6	C28C12.10	C13C4.5	C47E12.7	C09G9.6	T12F5.4	T12C9.1	Y39E4B.6	F56D2.3	F55D12.2	T03G6.1	C55B7.2	C18D11.1	F32D1.5	F45C12.7	F10E7.1	K01G5.6	F53B6.5
B0222.6	C16C10.1	W03F9.10	Y119D3B.20	NA	NA	Y48G1C.11	F58A3.1	F26E4.7	C06H2.6	C25A1.8	C49C3.7	F12B6.1	F14H3.10	F27D4.2	NA	NA	D1022.5	C50F2.8	F01D5.5	C24G7.4	C18C4.7	C05B5.12	C05B5.5	C26G2.2	C32B5.17	C43D7.8	F33A8.3	Y49E10.22	D2045.9	F55B11.1	NA	F46C8.6	C28C12.8	C13G3.1	C48C5.1	C09H10.5	T13A10.13	T12G3.4	Y39G10AR.17	F56D5.1	F55H12.3	T05A7.11	C56C10.9	C18E9.7	F32D1.9	F45D3.1	F10E9.11	K01H12.1	F53C11.8
B0222.7	C16C10.3	W10C8.2	Y11D7A.19	NA	NA	Y51A2D.20	F58A4.11	F26F4.1	C06H2.7	C25A1.9	C49D10.11	F12E12.1	F15A4.10	F27E5.2	NA	NA	D1044.1	C52B9.1	F01D5.8	C24H10.5	C18D1.4	C05B5.5	C05B5.8	C26H9A.1	C32B5.4	C43E11.9	F33E2.5	Y50D4A.4	DY3.3	F55B12.5	NA	F46E10.1	C28D4.1	C14A4.12	C48E7.2	C09H6.3	T16G1.9	T12G3.8	Y40A1A.3	F56E3.4	F55H2.6	T05C12.4	C56E6.5	C18E9.9	F32E10.4	F46G10.3	F11C3.1	K02G10.8	F53H8.2
B0222.8	C16C10.7	Y105E8A.17	Y11D7A.3	NA	NA	Y53C10A.4	F58B6.2	F26F4.4	C06H5.8	C25A11.2	C49D10.3	F12E12.10	F15B10.3	F28B12.3	NA	NA	D1081.6	C52D10.1	F01E11.3	C24H11.8	C18D4.2	C05B5.8	C05C12.4	C27C12.7	C32B5.5	C43H6.4	F33G12.6	Y51H4A.1	E01A2.7	F56D1.4	NA	F46G10.5	C28D4.2	C14A4.6	C49A9.1	C10B5.1	T18H9.6	T13F3.3	Y40B10A.8	F57A8.1	F57C12.5	T05E12.9	cTel3X.1	C18F3.2	F32H2.4	F48A11.5	F11H8.1	K04C2.4	F54B11.6
B0222.9	C16C2.4	Y110A7A.16	Y22D7AL.14	NA	NA	Y54F10AM.4	F59B10.1	F26G1.1	C07D8.6	C25D7.6	C49F5.3	F12E12.7	F16B12.6	F28C6.3	NA	NA	D1086.19	C52D10.3	F01G10.6	C25B8.1	C18E9.7	C05C12.3	C05C12.6	C27D6.12	C32B5.9	C43H8.2	F33H2.2	Y51H4A.4	E04F6.5	F56F10.4	NA	F46G11.2	C28D4.9	C14C10.7	C49A9.2	C10C6.5	T19B10.1	T14B4.5	Y41D4A.4	F57B1.6	F58A3.2	T06A1.1	D1009.3	C18G1.6	F33A8.1	F48D6.1	F12E12.10	K04G2.11	F54D5.5
B0228.1	C16C8.12	Y113G7B.11	Y39D8B.1	NA	NA	Y54G2A.8	F59C12.1	F27D9.6	C07E3.4	C25D7.8	C50A2.4	F12E12.8	F16G10.10	F28F8.6	NA	NA	D2005.1	C53A5.2	F02A9.3	C25B8.7	C18H7.2	C05C12.4	C05C8.8	C27F2.2	C32C4.3	C44B7.11	F35B3.5	Y51H7C.5	F02G3.1	F56F3.2	NA	F47B10.2	C28F5.2	C14F5.2	C49A9.6	C10C6.6	T20F7.6	T16A1.1	Y41D4B.6	F57C7.3	F58A4.11	T07D3.5	D1014.5	C18H7.2	F33D11.10	F49C12.9	F12E12.7	K04G2.8	F55A12.8
B0228.4	C16C8.14	Y15E3A.5	Y39G10AR.21	NA	NA	Y57A10A.15	H06H21.10	F27D9.8	C07G1.3	C25G4.6	C50B6.2	F12E12.9	F16G10.11	F28H1.1	NA	NA	D2021.1	C53C11.3	F02C12.1	C25E10.11	C18H9.7	C05C12.6	C05C9.2	C27H5.6	C32D5.9	C44B7.2	F35H10.1	Y53C12C.1	F07C3.7	F57G12.1	NA	F47C12.1	C28G1.6	C15A11.1	C49C8.4	C10G11.6	T21E8.7	T18D3.3	Y45F10B.15	F57F5.3	F58B6.2	T07D3.6	D2005.6	C18H9.7	F33D11.9	F49E8.5	F12E12.8	K04H4.6	F55C9.5
B0228.5	C16C8.4	Y37A1A.2	Y41D4B.26	NA	NA	Y57E12B.3	H08J11.2	F28B3.5	C07G2.1	C25H3.14	C50F2.1	F13D11.1	F16G10.6	F30A10.9	NA	NA	D2045.6	C53D5.2	F02D8.3	C25E10.2	C23G10.10	C05C9.1	C05D10.4	C27H6.1	C33C12.5	C44B9.6	F35H10.7	Y53F4B.42	F08C6.3	F59A3.1	NA	F47C12.2	C28H8.2	C15C8.5	C49F5.4	C10H11.8	T21H8.5	T19A5.4	Y45G5AM.6	F58A3.1	F59A2.2	T07F12.1	D2024.4	C23G10.10	F33G12.4	F53A2.6	F12E12.9	K05C4.9	F55D10.3
B0228.6	C16C8.5	Y41D4B.10	Y42A5A.2	NA	NA	Y57G11A.1	H11E01.3	F28B4.2	C07H6.2	C25H3.3	C51E3.2	F13E6.3	F16G10.8	F31E3.3	NA	NA	D2085.1	C54D1.6	F07C3.2	C25F6.6	C23H3.9	C05C9.2	C05D11.6	C28C12.11	C33F10.13	C44C10.8	F36D4.5	Y54E2A.3	F08C6.4	F59A7.8	NA	F47G4.4	C28H8.3	C15C8.6	C49F8.2	C11D2.4	T23B5.3	T20F10.1	Y46E12A.3	F58E6.10	F59A2.6	T08G2.2	D2062.12	C23H5.3	F34D10.2	F53B3.1	F12F6.1	K06A5.4	F55F8.5
B0228.7	C17D12.1	Y41D4B.26	Y43E12A.2	NA	NA	Y67A10A.9	H39E23.1	F28F8.6	C07H6.5	C25H3.6	C52A10.2	F13E9.13	F17A2.13	F31E8.4	NA	NA	D2089.1	C54D10.10	F07F6.7	C25F6.7	C23H4.2	C05D10.4	C05D12.2	C29A12.4	C33G3.4	C44H4.4	F36G3.2	Y54G11A.2	F08F1.8	F59F3.5	NA	F47G9.4	C29E4.10	C15C8.7	C49G7.11	C13B4.1	T23F11.4	T21E8.6	Y48G10A.3	F58F12.4	F59C12.1	T11G6.2	D2063.1	C24A1.1	F35B12.5	F53C3.2	F13E9.13	K07A1.10	F55G1.10
B0228.8	C17E4.3	Y41D4B.4	Y43F4B.5	NA	NA	Y67D8A.1	H42K12.3	F28G4.2	C08B11.1	C25H3.9	C52D10.6	F13H8.11	F17A2.5	F31E9.6	NA	NA	D2089.3	C54G7.4	F07G11.5	C25F9.5	C23H4.8	C05D12.2	C05D12.3	C29A12.7	C34E7.4	C44H4.5	F37H8.5	Y54G2A.23	F08F8.10	F59F4.3	NA	F48E3.9	C29F5.7	C15F1.1	C50B6.11	C13B4.2	T23G4.1	T22H2.4	Y48G9A.3	F58F9.3	F59F5.7	T11G6.4	D2092.8	C24A11.2	F35F11.1	F53F10.5	F14B6.3	K07C5.13	F56A11.1
B0238.1	C17E4.4	Y43C5A.5	Y44E3A.6	NA	NA	Y67D8A.2	K03H1.5	F29F11.5	C08B11.6	C27A12.6	C52D10.7	F14B4.2	F17A9.5	F32B6.9	NA	NA	D2089.5	C54H2.5	F08B12.1	C26B2.3	C23H5.11	C05D12.3	C05D12.7	C29F3.6	C34F6.9	C44H4.7	F38A5.2	Y55D5A.6	F08F8.3	F59F5.6	NA	F48F7.3	C29F9.6	C16C4.1	C50C3.5	C13B7.6	T23G7.2	T23B3.2	Y50D7A.1	F59A3.1	H03E18.1	T12A2.10	E01A2.3	C24A3.2	F35G12.11	F53H1.1	F14E5.4	K07E3.2	F56A12.1
B0238.10	C17E7.12	Y46B2A.1	Y46B2A.1	NA	NA	Y71G12B.11	K04A8.6	F29G9.5	C08B6.9	C27A12.7	C52D10.8	F14B6.2	F17C11.4	F32E10.2	NA	NA	D2096.1	C55C3.5	F08B4.2	C26B9.5	C23H5.2	C05D12.7	C05D2.4	C30B5.6	C34G6.4	C45E1.1	F38A6.1	Y55F3AR.2	F08G2.7	H02I12.4	NA	F48G7.4	C30B5.5	C16C4.17	C50C3.7	C13F10.2	T24A6.8	T24F1.3	Y50D7A.6	F59B10.2	H06I04.6	T14D7.1	E01G6.2	C24A8.5	F35G12.2	F53H4.6	F15A4.13	K08E4.1	F56C11.3
B0238.11	C17E7.3	Y47D3B.9	Y47D3B.10	NA	NA	Y71H2AM.19	K04B12.1	F30F8.10	C08C3.2	C27A2.3	C52D10.9	F14B6.3	F17C11.5	F32E10.6	NA	NA	DC2.7	C56A3.7	F09A5.3	C26B9.7	C24A1.2	C05D2.4	C05D9.4	C30B5.7	C35A5.2	C46C11.4	F39B3.2	Y56A3A.13	F09C6.9	H06I04.1	NA	F52B11.3	C30B5.7	C16C4.6	C50E3.16	C13F10.5	T25B2.1	T25D10.2	Y51A2D.15	F59B2.9	H11E01.3	T14E8.4	E02H9.6	C24D10.9	F35G12.4	F54A5.1	F15A4.2	K09E9.3	F58E10.4
B0238.12	C17F4.5	Y51A2D.21	Y47H9C.5	NA	NA	Y80D3A.7	K04G11.1	F31C3.4	C08C3.4	C27B7.2	C52E2.1	F14E5.4	F17E9.13	F33D11.11	NA	NA	E01A2.2	C56E6.1	F09C12.6	C26D10.5	C24A8.1	C05D9.4	C05E11.5	C30F2.2	C35C5.1	C46H3.2	F39G3.2	Y56A3A.21	F09E5.10	H08J11.2	NA	F52C12.5	C30E1.2	C16D6.2	C50F4.16	C13F10.6	T27A8.1	T28C6.7	Y51F10.3	F59E11.8	H12D21.6	T15B7.10	E03H4.8	C24F3.3	F35G12.9	F54D10.1	F15B10.3	K09H11.1	F59A7.4
B0238.13	C17G10.1	Y53C12B.6	Y53C12B.1	NA	NA	Y92H12BL.4	K04H4.1	F31C3.6	C08F8.2	C27B7.5	C52E2.6	F14H12.6	F18C12.4	F33E11.6	NA	NA	E01A2.8	C56E6.6	F09E10.6	C26D10.6	C24G6.7	C05E11.8	C05E11.8	C30F2.3	C35D10.8	C47C12.3	F39H12.4	Y57A10A.23	F09E5.5	H19M22.3	NA	F52D10.3	C30F12.3	C16D9.8	C50H11.8	C13G5.2	W03F9.4	W02D3.3	Y51H4A.2	H14A12.4	H12I19.115	T19A5.3	F01D5.6	C24G6.7	F35H8.7	F54D11.2	F17A2.13	K10B3.5	F59H6.12
B0238.15	C17H11.2	Y54E5B.2	Y53C12B.6	NA	NA	Y9C9A.5	K06A5.8	F31D4.5	C08F8.3	C27B7.8	C52E2.7	F15A4.10	F18E2.3	F35B12.5	NA	NA	E01G4.5	C56G2.4	F09E5.12	C27A2.4	C24H11.8	C05E7.1	C05E7.1	C30G4.4	C35E7.3	C47D12.1	F40F4.4	Y57A10A.26	F09E8.2	H38K22.5	NA	F52E10.5	C30G12.7	C17C3.3	C50H2.1	C14A4.10	W06A7.4	W03A3.1	Y54E10A.16	H36L18.1	H24G06.1	T19B4.1	F01G10.6	C24H11.8	F36A4.14	F54F2.7	F17A9.2	K10C9.3	H01M10.1
B0238.5	C17H12.1	Y65A5A.1	Y54E5A.8	NA	NA	ZC373.4	K07B1.8	F32A7.4	C08H9.3	C27C7.1	C52E2.8	F15A4.2	F19B10.2	F35E2.2	NA	NA	E02C12.3	cTel54X.1	F09G2.1	C27A7.1	C25A6.1	C05E7.2	C05E7.2	C30G7.5	C35E7.5	C47D12.4	F40G9.15	Y57G7A.10	F09F9.4	H41C03.1	NA	F52H2.6	C30G7.1	C17E7.1	C51E3.1	C14A4.11	Y105E8A.19	W04A8.4	Y55B1BR.2	K01A2.5	H27M09.4	T19B4.7	F02D8.2	C25D7.9	F36H2.2	F54F7.6	F18A1.4	K11D2.3	H02I12.6
B0238.7	C17H12.13	Y69A2AR.28	Y54F10BL.1	NA	NA	ZC449.5	K07D4.7	F32B4.8	C09D4.4	C27C7.7	C52E4.3	F15B10.3	F19H6.5	F35G12.11	NA	NA	E02D9.1	D1007.1	F10A3.11	C27A7.2	C25D7.15	C06A1.2	C05E7.3	C30H6.1	C35E7.6	C47E12.7	F40G9.6	Y60A3A.14	F10D7.5	K01A2.3	NA	F53A2.1	C30H6.6	C17G1.3	C51E3.9	C14B1.12	Y105E8A.29	W08F4.6	Y55D5A.1	K01A6.2	H39E23.1	T19D12.7	F07C3.1	C25F9.10	F36H5.5	F55A8.1	F19C6.5	K11E4.4	H15N14.1
B0238.8	C17H12.2	Y69A2AR.29	Y54G2A.1	NA	NA	ZK1067.6	K08A8.3	F32B6.9	C09E9.1	C27D8.4	C53A3.1	F15D3.6	F19H8.1	F35H10.1	NA	NA	E02H9.3	D1009.3	F10B5.4	C27A7.3	C25E10.2	C06A12.4	C05H8.1	C31B8.13	C36B7.1	C47E12.8	F41H10.5	Y66D12A.9	F10E9.6	K01A2.4	NA	F53G2.4	C30H6.7	C17G1.6	C52B9.7	C14B1.2	Y111B2A.8	W09B6.5	Y55D5A.3	K02A11.1	H42K12.3	T22C1.7	F07C3.7	C25F9.14	F36H9.3	F55C5.10	F19C7.3	M02A10.3	H20J04.5
B0238.9	C18A3.1	Y69A2AR.32	Y66A7A.3	NA	NA	ZK112.2	K08D12.2	F32D1.11	C09F5.2	C27F2.10	C53A5.1	F16G10.6	F22B7.13	F35H10.11	NA	NA	E03E2.1	D1009.5	F10B5.9	C27A7.4	C25E10.3	C06B3.7	C06A1.2	C31B8.8	C36B7.6	C47E8.7	F42G8.4	Y67D2.3	F10G7.5	K02B12.1	NA	F54C9.5	C31B8.2	C17G10.10	C52D10.11	C14B1.8	Y113G7A.3	W09D10.4	Y55D9A.1	K02D10.2	K03H1.5	T22F7.3	F07H5.2	C25F9.16	F37E3.1	F55C9.1	F19F10.9	M04B2.1	H24K24.4
B0240.1	C18B2.4	Y71F9AM.6	Y69A2AR.29	NA	NA	ZK112.7	K08E5.3	F32D8.3	C09G4.1	C27H6.2	C53C7.3	F16G10.9	F22E5.12	F36A2.3	NA	NA	EEED8.12	D1037.2	F11C7.5	C27B7.7	C25F6.6	C06B3.8	C06A12.4	C31C9.7	C36E6.1	C47G2.2	F43C9.4	Y71F9AL.9	F11D5.3	K02B2.4	NA	F54D10.3	C31E10.1	C17G10.8	C52E2.5	C14C10.5	Y116A8C.36	Y102A11A.6	Y55F3AL.1	K02E10.4	K04A8.6	T23G11.6	F07H5.6	C25F9.6	F38C2.5	F55C9.10	F21D5.4	M04B2.3	K02B7.3
B0240.2	C18D11.3	Y71G12B.8	Y71A12B.12	NA	NA	ZK1193.5	K09F5.6	F32E10.3	C09G9.1	C27H6.3	C54G10.2	F17A2.13	F22E5.2	F36D3.1	NA	NA	EEED8.4	E01A2.3	F11E6.2	C27D6.1	C25F9.16	C06C3.3	C06A8.7	C32A3.3	C36E6.2	C48D1.1	F43G6.4	Y71F9AM.6	F11F1.7	K02B2.5	NA	F54D8.1	C31H2.3	C17H11.5	C53A5.13	C14C11.2	Y119C1B.10	Y105E8A.22	Y57A10A.15	K02E10.6	K04B12.1	T24B1.1	F08A8.5	C25G6.1	F38C2.7	F56A4.12	F21D9.1	M142.4	K02G10.1
B0240.3	C18E3.5	ZC132.4	Y71A12B.15	NA	NA	ZK1225.2	K10B3.10	F32E10.6	C09G9.2	C27H6.8	C54G6.1	F17A9.2	F22E5.20	F36H5.4	NA	NA	F01F1.1	E01F3.1	F13C5.1	C27F2.1	C25F9.5	C06C3.6	C06A8.8	C32D5.6	C36E8.3	C49A1.4	F44A6.3	Y71G12B.12	F13B9.6	K02E10.8	NA	F54E2.2	C32A9.1	C17H12.10	C53A5.16	C14C11.6	Y119D3B.18	Y105E8A.25	Y57A10A.35	K02E10.8	K04F10.4	T25B2.4	F08B12.1	C25G6.3	F39B2.1	F56A8.5	F22B3.1	R03A10.1	K03E5.3
B0240.4	C18E3.6	ZC506.3	Y73F8A.21	NA	NA	ZK1236.3	K10D3.4	F32G8.4	C09G9.6	C27H6.9	C54H2.3	F19C7.3	F22G12.3	F36H5.8	NA	NA	F07A11.5	E02H9.6	F13C5.5	C27H5.1	C25G6.3	C06C6.4	C06A8.9	C32E8.6	C37C3.2	C49H3.6	F44B9.6	Y74C9A.4	F13E6.4	K03D10.1	NA	F54G8.4	C32B5.9	C17H12.4	C53A5.4	C14C11.7	Y119D3B.20	Y113G7A.6	Y57G11C.17	K04D7.4	K04H4.1	T26E3.2	F08C6.7	C25G6.4	F39H11.2	F56A8.6	F22B3.2	R05D3.2	K05C4.3
B0244.10	C18E3.7	ZK1053.4	Y75B8A.6	NA	NA	ZK669.1	K10G6.1	F32H2.11	C09H10.10	C28A5.1	C55C2.1	F19F10.10	F23A7.1	F37B1.5	NA	NA	F07E5.6	E04A4.6	F13D11.2	C27H5.8	C26B2.3	C06C6.5	C06B3.6	C32E8.8	C37C3.8	C50D2.10	F44C4.5	Y79H2A.6	F13H8.7	K04D7.4	NA	F55A12.7	C32C4.1	C18A11.1	C53B4.1	C15C6.4	Y17G7B.21	Y116A8C.10	Y58A7A.2	K06A5.8	K04H4.2	T26E4.3	F08D12.7	C25H3.5	F40F8.12	F56A8.8	F22B8.7	R05D7.7	K05C4.8
B0244.2	C18E3.8	ZK1128.1	ZC506.3	NA	NA	ZK867.1	K12C11.4	F33H1.3	C09H10.5	C28A5.2	C56G2.5	F19F10.5	F23B12.8	F39E9.22	NA	NA	F08B4.5	F01D5.5	F13D12.6	C28A5.3	C26B2.4	C06E1.3	C06B3.7	C32H11.3	C37E2.4	C50D2.7	F45G2.4	ZC132.4	F14B8.1	K06A1.3	NA	F55A4.10	C32D5.1	C18A11.2	C53C7.1	C15C7.1	Y34B4A.7	Y17D7C.1	Y60A3A.1	K08C7.5	K07D4.7	T27D12.6	F08F1.6	C26B2.3	F40F8.3	F56D5.5	F22E5.1	R05F9.9	K05F1.5
B0244.5	C18E3.9	ZK1236.2	ZK1290.8	NA	NA	ZK899.8	M01E10.2	F33H2.8	C09H10.6	C28A5.6	C56G2.7	F20H11.1	F23F12.9	F40F4.3	NA	NA	F08B4.7	F01E11.3	F13D12.7	C28C12.5	C26B2.5	C06E1.4	C06C3.10	C33A12.11	C37E2.5	C50F2.4	F45H11.1	ZC132.6	F14F3.1	K07C11.1	NA	F55D10.1	C32E12.4	C18B12.2	C53C9.3	C15C8.4	Y34D9A.10	Y34D9B.1	Y60A3A.19	K08F8.2	K07G5.3	W01B6.1	F08G12.11	C26B2.4	F40G9.1	F56G4.2	F22E5.16	R06A4.2	K06A1.5
B0244.7	C18E9.6	ZK131.3	ZK355.2	NA	NA	NA	M03A1.1	F35D2.6	C09H6.3	C28D4.3	CD4.8	F20H11.2	F23H12.6	F40F4.7	NA	NA	F08C6.6	F01G10.9	F13D12.9	C28F5.2	C26B9.2	C06E1.7	C06C3.6	C33A12.13	C37H5.5	C50F4.6	F46C8.3	ZC513.12	F15D3.6	K07C11.4	NA	F55F3.1	C32E8.6	C18B12.4	C53D6.3	C15F1.3	Y39A1C.2	Y37E11AR.2	Y6D1A.2	K09E2.4	K08D12.2	W02B12.8	F09C6.9	C26B9.5	F40G9.17	F56G4.3	F22E5.20	R06F6.1	K06C4.11
B0244.8	C18G1.4	ZK131.5	ZK783.1	NA	NA	NA	M03B6.3	F36H1.6	C10B5.1	C28H8.4	D1007.16	F21D5.1	F25B4.8	F40F8.11	NA	NA	F08D12.10	F07A11.4	F13D2.1	C29A12.4	C26B9.5	C06E2.1	C06C6.4	C33B4.3	C38C10.4	C52D10.9	F46E10.2	ZK1236.2	F18A1.2	K08B4.4	NA	F55F8.1	C32F10.4	C18D11.9	C53H9.2	C15F1.6	Y39B6A.47	Y37E11AR.6	Y71G12A.2	K10C3.6	K09F5.6	W03D2.5	F10B5.4	C26C6.4	F40G9.18	F56H6.2	F22G12.3	R07A4.3	K06C4.13
B0244.9	C18H9.3	ZK131.7	ZK809.1	NA	NA	NA	M110.1	F36H2.2	C10C6.1	C29F7.4	D1009.2	F21D9.1	F25B5.2	F40G9.11	NA	NA	F08D12.11	F07B7.12	F13D2.2	C29A12.6	C26C6.8	C06E2.2	C06C6.5	C33C12.3	C38D4.5	C54D1.5	F46F3.1	ZK1321.3	F20C5.6	K08E5.3	NA	F56B3.2	C33A11.1	C18D4.4	C54D1.1	C15F1.7	Y39G10AR.18	Y37F4.6	Y71H2AL.2	K10D3.4	K10B3.1	W03D8.11	F10D11.6	C26D10.6	F40G9.9	F58A4.3	F23A7.1	R07B1.1	K06C4.3
B0250.1	C23G10.4	ZK131.9	ZK899.2	NA	NA	NA	M28.8	F37H8.2	C10C6.7	C29F7.5	D1025.2	F22D6.2	F25H5.5	F41G3.14	NA	NA	F08D12.6	F07G6.8	F13G3.3	C29E6.2	C26D10.6	C06E2.3	C06E1.3	C33D9.4	C39B5.2	C55A6.2	F46F6.2	ZK154.4	F21A9.2	K09A11.2	NA	F56D1.5	C33A11.4	C18E9.2	C54D1.6	C15H11.4	Y42H9B.2	Y39A3CR.3	Y73B3A.20	K10D6.2	K11C4.3	W04H10.3	F10D7.2	C26F1.1	F41B4.3	F58B3.3	F23B12.8	R07B5.9	K06C4.5
B0250.2	C23G10.7	ZK228.3	ZK909.4	NA	NA	NA	R02F2.2	F38E1.7	C10F3.1	C29H12.2	D1046.1	F22E5.1	F26A1.1	F42A6.2	NA	NA	F08D12.8	F07H5.2	F13H10.5	C29F5.1	C26F1.10	C06E4.8	C06E2.1	C33G3.1	C39E6.1	C55B6.2	F48E3.6	ZK353.6	F21F3.7	K09A9.3	NA	F56E3.4	C33C12.9	C18H7.1	C54D10.2	C15H11.6	Y47D3B.10	Y39B6A.38	Y73B3A.3	M02F4.2	K11D12.10	W04H10.4	F10E7.10	C26F1.5	F42A10.5	F58D5.9	F23D12.4	R09F10.3	K07A1.15
B0250.5	C24A11.9	ZK75.2	NA	NA	NA	NA	R03C1.3	F38E11.3	C10G11.10	C30A5.3	D1054.3	F22E5.11	F26A3.5	F42G9.2	NA	NA	F08D12.9	F08B12.1	F13H6.5	C29F9.4	C26F1.5	C06E7.2	C06E2.3	C34B4.2	C39E6.4	C55C2.1	F49B2.3	ZK418.5	F21G4.1	K09C8.5	NA	F56F3.5	C33D9.3	C18H7.11	C54D2.2	C15H11.7	Y47D3B.9	Y39C12A.9	Y73F8A.26	M04C9.5	K11D12.4	W07G4.3	F10E7.9	C26G2.2	F42G9.1	F58E1.10	F25H5.10	R107.6	K07F5.15
B0250.9	C24B5.2	ZK783.1	NA	NA	NA	NA	R05D3.9	F40A3.2	C10G11.5	C30C11.2	D1069.4	F22E5.12	F26D2.16	F43D2.1	NA	NA	F08G12.2	F08B4.2	F13H8.1	C29H12.6	C26G2.2	C06E8.5	C06E4.3	C34B4.4	C39F7.2	C56C10.11	F49B2.7	ZK525.2	F21H11.3	K10B3.10	NA	F57B1.5	C33H5.17	C18H7.3	C54F6.14	C15H11.8	Y47G6A.27	Y41D4B.7	Y80D3A.7	M110.1	K12C11.4	W09C5.5	F11A5.6	C27A2.7	F43G6.5	F58E1.11	F26E4.12	R10E11.7	K07F5.16
B0252.1	C24D10.4	ZK863.3	NA	NA	NA	NA	R07E3.6	F41A4.1	C10G11.6	C30G4.3	D1081.6	F22E5.16	F26E4.12	F43G9.5	NA	NA	F08G2.6	F08F1.3	F13H8.4	C30A5.10	C27A7.2	C06G1.1	C06E8.5	C34E11.2	C40A11.2	D1025.2	F49E12.5	ZK856.11	F22A3.5	K10B4.2	NA	F58E6.10	C34B4.7	C23G10.11	C54F6.15	C16A11.10	Y47G6A.29	Y45F10A.7	Y87G2A.13	M28.7	M01B12.4	Y106G6G.2	F11E6.8	C27A2.8	F44B9.8	F58E1.5	F26F12.7	R10E4.1	K08A2.1
B0252.2	C24D10.6	ZK909.4	NA	NA	NA	NA	R09E10.5	F41C3.5	C10H11.10	C30H6.7	D1081.8	F22E5.2	F26G5.9	F44A6.2	NA	NA	F08G5.5	F09B9.2	F14F11.1	C30A5.2	C27A7.3	C06G1.2	C06G1.2	C34E7.1	C40A11.3	D1037.3	F49E12.6	ZK930.3	F22B7.10	K10B4.3	NA	F58E6.8	C34C6.1	C23H3.2	C54F6.6	C16A11.2	Y48C3A.4	Y45F3A.3	Y9C9A.5	M79.1	M01D7.7	Y16E11A.2	F11F1.6	C27A7.3	F44G4.2	F58E10.2	F26H11.8	R10E4.2	K08C7.3
B0252.3	C24F3.1	ZK930.3	NA	NA	NA	NA	R09E10.7	F42H10.7	C10H11.4	C30H7.2	D1086.18	F22H10.5	F26H11.2	F44B9.7	NA	NA	F08H9.3	F09C12.6	F15A2.2	C30E1.5	C27A7.4	C06G3.1	C06G3.1	C34F11.8	C40A11.4	D1044.1	F49H12.6	ZK993.1	F22D3.2	K11G9.4	NA	F59C12.1	C34C6.7	C23H3.7	C54G10.4	C16A11.4	Y48C3A.7	Y46G5A.2	ZK112.2	R03G5.6	M01E10.2	Y17G7B.22	F13A2.10	C27C12.5	F45C12.10	F59A2.4	F27C1.4	R11A8.4	K08D10.4
B0252.4	C24F3.2	NA	NA	NA	NA	NA	R105.1	F43C9.2	C10H11.8	C31B8.12	D1086.19	F23A7.1	F28B12.3	F44B9.8	NA	NA	F09C3.3	F09E10.6	F15A8.6	C30F2.2	C27D6.1	C06G4.5	C06G4.5	C34G6.2	C40A11.7	D1053.1	F52B10.2	NA	F22D3.6	K11H3.3	NA	F59F4.1	C34D1.1	C23H4.4	C54G7.2	C16A11.6	Y48G1C.10	Y47D3B.4	ZK112.5	R05D7.5	M01E11.7	Y17G9A.1	F13A2.9	C27D6.4	F45C12.12	F59E12.2	F28H1.1	R11E3.6	K08H10.9
B0252.5	C24F3.4	NA	NA	NA	NA	NA	R10F2.1	F43G9.2	C11D2.4	C32B5.10	D2005.4	F23C8.9	F28F8.2	F45C12.4	NA	NA	F09E5.16	F09G8.8	F15B9.1	C30F8.2	C27F2.2	C06G8.2	C06G8.2	C34H4.5	C40H5.2	D2005.1	F52D1.1	NA	F23C8.3	K12H4.1	NA	H11E01.3	C34D10.2	C23H4.7	C56A3.3	C16A3.5	Y48G1C.11	Y48C3A.18	ZK112.7	R07E5.17	M02B7.5	Y18H1A.14	F13A7.12	C27F2.2	F45C12.15	H03G16.5	F29A7.2	R11G1.7	K08H2.1
B0252.8	C24G6.1	NA	NA	NA	NA	NA	R11F4.3	F44B9.1	C12C8.3	C32E8.5	D2030.12	F23D12.4	F29A7.2	F45D11.5	NA	NA	F09G2.9	F10B5.4	F15B9.8	C30G12.1	C27H6.1	C06H2.5	C06H2.5	C35B1.1	C41D11.6	D2013.6	F52E1.9	NA	F25B3.4	LLC1.1	NA	H19M22.3	C34E10.4	C23H5.1	CC4.2	C16A3.8	Y48G1C.2	Y50D4C.1	ZK1240.9	R08C7.1	M04G12.4	Y24D9A.7	F13B12.4	C27H5.1	F45E4.10	H19N07.2	F29C4.7	R11H6.2	K08H2.7
B0261.1	C25A1.13	NA	NA	NA	NA	NA	R31.1	F44F4.2	C12D8.10	C32E8.9	D2045.6	F25B5.2	F29C4.1	F45H11.1	NA	NA	F10C5.1	F10B5.9	F15G9.1	C30H6.12	C28C12.4	C06H5.7	C07A12.2	C35C5.9	C41D7.1	D2045.9	F52E4.8	NA	F25B3.5	M01B12.4	NA	H37A05.1	C34E11.1	C23H5.7	CC8.1	C16C10.2	Y50D4C.3	Y50E8A.1	ZK262.2	R09F10.5	M28.8	Y32F6B.3	F13B9.2	C27H5.8	F46F11.4	H24K24.2	F29F11.2	R12B2.4	K10C2.4
B0261.2	C25A1.5	NA	NA	NA	NA	NA	T01D3.3	F44G3.9	C12D8.11	C33A12.12	D2085.1	F25D7.2	F30A10.15	F46C8.3	NA	NA	F10D11.5	F10C1.2	F15G9.5	C30H6.2	C28G1.6	C07A12.2	C07A4.1	C35E7.2	C41H7.1	D2085.2	F52H2.1	NA	F25B5.1	M01B12.5	NA	H38K22.5	C35B1.1	C23H5.9	D1009.4	C16C10.3	Y50D7A.8	Y54E5B.1	ZK616.10	R11B5.1	R03C1.3	Y37E3.13	F13D11.4	C27H6.1	F47H4.1	H24K24.3	F30A10.15	R13G10.1	K10C3.4
B0261.4	C25A1.8	NA	NA	NA	NA	NA	T01D3.6	F44G4.4	C13B4.1	C33C12.9	DC2.7	F25H2.8	F30A10.9	F46H6.1	NA	NA	F10D2.10	F10G8.5	F16B3.1	C31A11.1	C29A12.4	C07A4.1	C07A9.11	C36B1.1	C41H7.2	E02H1.3	F52H2.2	NA	F25B5.5	M03A1.1	NA	H42K12.3	C35B1.2	C24A3.6	D1044.8	C16C10.6	Y51H7C.10	Y54F10AL.1	NA	R13F6.6	R04B5.6	Y37E3.5	F13G3.8	C28H8.6	F48E8.2	H27D07.6	F31C3.3	T02C1.1	K10G9.3
B0261.5	C25D7.7	NA	NA	NA	NA	NA	T01D3.7	F46B6.3	C13B4.2	C33F10.14	DY3.8	F26E4.11	F31E3.3	F48C1.6	NA	NA	F10D2.5	F10G8.8	F16F9.1	C31H2.1	C29A12.7	C07A9.11	C07B5.3	C36B1.6	C41H7.5	E04A4.1	F53A2.4	NA	F25B5.6	M03A1.8	NA	K02A6.3	C36A4.10	C24G6.2	D1053.3	C16C10.7	Y51H7C.5	Y54G11A.9	NA	R53.3	R05D7.3	Y38C1AB.2	F13H10.1	C29A12.4	F48E8.5	H28G03.2	F31D5.6	T04C10.2	K11C4.4
B0261.6	C25D7.8	NA	NA	NA	NA	NA	T01E8.3	F46B6.5	C13B7.6	C33H5.6	E01A2.2	F26F4.1	F31E3.5	F48E3.6	NA	NA	F10D2.6	F11A5.10	F16H11.4	C32A3.3	C29E6.4	C07B5.3	C07C7.1	C36B7.8	C41H7.8	E04A4.2	F53B3.5	NA	F25F8.1	M03D4.4	NA	K02B9.4	C36B7.4	C24H10.5	D1073.1	C16C2.4	Y53C12B.6	Y54G2A.2	NA	T01D1.8	R07E3.6	Y39E4B.12	F13H10.5	C29E6.4	F49C12.11	H37A05.4	F31E8.4	T07A9.15	K11D12.12
B0261.7	C25G4.4	NA	NA	NA	NA	NA	T01G1.3	F46C8.6	C13B9.2	C34B2.2	E01A2.4	F27C1.4	F31E8.3	F48E8.7	NA	NA	F10D2.7	F11D5.1	F17B5.4	C32B5.11	C29F3.2	C07D10.4	C07D10.3	C36C5.10	C42C1.1	E04F6.3	F53G12.1	NA	F26B1.7	M04F3.5	NA	K02D10.1	C36E8.1	C25B8.6	D1086.5	C16C8.12	Y54E10BR.1	Y55B1AL.3	NA	T01G6.7	R07E4.1	Y39H10A.6	F14B8.2	C29F3.2	F49D11.1	H38K22.2	F31E9.6	T07C12.12	K12H4.4
B0261.8	C25H3.14	NA	NA	NA	NA	NA	T02G6.2	F46E10.1	C13C4.6	C34B2.6	E01A2.8	F28H1.1	F31E9.6	F49B2.1	NA	NA	F10E7.1	F11E6.8	F17B5.6	C32E12.1	C29F3.4	C07F11.2	C07D10.4	C36C5.15	C42D4.6	EEED8.15	F54C8.3	NA	F26E4.11	M199.2	NA	K02E10.4	C36E8.2	C25E10.12	D2013.5	C16C8.14	Y54F10BL.1	Y56A3A.2	NA	T02G5.4	R08C7.11	Y40B10A.9	F14B8.7	C29F9.13	F49E8.3	K01G5.5	F32A5.1	T07C4.10	K12H6.6
B0261.9	C25H3.4	NA	NA	NA	NA	NA	T04A8.5	F46F3.1	C13D9.7	C34B2.8	E01G4.5	F29A7.1	F32B6.9	F49C12.9	NA	NA	F10G2.4	F13B12.3	F17E9.1	C32E12.2	C29F3.5	C07G3.2	C07E3.3	C36C5.3	C42D8.3	F01G10.2	F54G8.3	NA	F26G1.4	M28.1	NA	K03A1.2	C36H8.3	C25E10.2	D2013.7	C16C8.20	Y54G2A.1	Y57A10A.18	NA	T04F8.4	R09E10.5	Y40H7A.3	F14D12.2	C29F9.2	F49E8.4	K02F2.3	F32B4.4	T08A9.1	M01D1.10
B0272.1	C26B2.7	NA	NA	NA	NA	NA	T04B8.5	F46F5.7	C13F10.5	C34C12.3	E02D9.1	F31C3.4	F32D1.10	F49E12.6	NA	NA	F10G2.6	F13D11.2	F18A11.5	C32E12.3	C29F3.6	C08A9.1	C07F11.2	C37A5.11	C43D7.2	F01G10.7	F55D10.3	NA	F27D4.5	R02C2.4	NA	K06A1.3	C37F5.1	C25E10.7	D2013.9	C16C8.4	Y54G2A.17	Y59A8B.22	NA	T05A10.1	R11A5.6	Y47D3B.1	F14H8.6	C29F9.3	F52B11.1	K03A11.1	F32E10.2	T08E11.7	M01E11.1
B0272.2	C26D10.1	NA	NA	NA	NA	NA	T05C12.10	F47A4.3	C13F10.6	C34E10.5	E02H1.4	F31D5.6	F32H2.2	F53A2.3	NA	NA	F10G7.4	F13D2.1	F18C5.4	C32E12.4	C29F9.12	C08B6.1	C07G1.1	C37A5.4	C43D7.5	F01G10.8	F55F8.5	NA	F27D4.6	R02F2.2	NA	K08F8.2	C37H5.2	C25E10.8	E03D2.1	C16C8.5	Y55F3C.10	Y59A8B.9	NA	T05G5.2	R11F4.3	Y49A3A.4	F15A8.6	C29F9.8	F52B11.6	K04G7.11	F32E10.6	T08G2.3	M01F1.6
B0272.3	C26E6.12	NA	NA	NA	NA	NA	T08G2.2	F47G9.3	C13G3.3	C34E10.6	E02H9.3	F31E8.4	F33E11.3	F53C11.8	NA	NA	F11A5.12	F13D2.4	F18E3.12	C32E8.7	C29F9.13	C08B6.10	C07G3.2	C37F5.1	C43D7.8	F07A11.2	F56A11.1	NA	F28B12.2	R03A10.5	NA	K08H10.3	C37H5.6	C25F9.15	E03D2.2	C17E4.3	Y56A3A.3	Y60A3A.14	NA	T07A5.6	R12B2.5	Y54G2A.4	F15E6.10	C29G2.5	F52C12.4	K05F6.12	F33H2.3	T10C6.11	M03F4.4
B0272.4	C26E6.5	NA	NA	NA	NA	NA	T08H4.1	F48C1.6	C13G5.2	C34H4.5	E04A4.4	F31E9.2	F33H2.5	F54B11.4	NA	NA	F11D11.12	F13E6.4	F18E9.1	C32F10.4	C29F9.3	C08B6.11	C08A9.1	C37H5.8	C43D7.9	F07A11.5	F56A12.1	NA	F28B4.4	R03E1.3	NA	K10B4.2	C38C3.4	C25G4.1	F02C12.5	C17E4.4	Y57G11C.1131	Y60A3A.5	NA	T07C5.1	R13.4	Y55F3C.7	F15E6.7	C29H12.3	F52C6.11	K05F6.2	F33H2.7	T13F2.8	M04C7.1
B0273.1	C26E6.7	NA	NA	NA	NA	NA	T08H4.2	F48E3.9	C14A4.11	C35B1.1	EEED8.12	F32B4.4	F34D6.1	F54D11.1	NA	NA	F11H8.1	F13G3.3	F19H6.7	C33A11.4	C29F9.4	C08B6.12	C08B6.1	C37H5.9	C43H6.4	F07B7.10	F56B3.5	NA	F28H6.2	R03H10.2	NA	K10B4.3	C38H2.1	C26F1.2	F02D8.5	C17E4.6	Y57G11C.31	Y71F9B.5	NA	T07D3.1	R13F6.4	Y56A3A.6	F16B4.12	C29H12.6	F52C6.8	K05F6.4	F35E2.2	T13H5.4	M04F3.4
B0273.2	C26F1.7	NA	NA	NA	NA	NA	T10H10.1	F48F7.3	C14B1.12	C35D10.7	EEED8.4	F33H2.7	F35E12.3	F55G1.10	NA	NA	F12E12.1	F13H8.1	F19H8.3	C33B4.2	C29G2.6	C08B6.4	C08B6.10	C39B10.5	C43H6.7	F07B7.11	F56F10.4	NA	F28H6.6	R05D3.9	NA	K10C3.6	C39B5.3	C26F1.6	F02E11.2	C17E7.12	Y59A8B.23	Y71H2AM.19	NA	T08H4.2	R13H4.1	Y57G11C.21	F16F9.3	C30A5.10	F52C9.7	K05F6.5	F35E2.8	T14G12.4	M106.1
B0273.3	C26H9A.1	NA	NA	NA	NA	NA	T12E12.6	F49E8.4	C14B1.2	C35D6.3	EEED8.7	F35C11.6	F35E2.8	F56A12.1	NA	NA	F12E12.10	F13H8.4	F19H8.4	C33D12.2	C29H12.3	C08B6.5	C08B6.12	C40A11.5	C43H8.1	F07B7.4	F57A8.1	NA	F29D10.4	R09D1.12	NA	K10D3.4	C39B5.4	C26F1.7	F07C3.10	C17E7.4	Y59A8B.7	Y87G2A.14	NA	T09E8.1	R57.2	Y57G7A.12	F16F9.4	C30B5.9	F52D2.6	K05F6.6	F36D3.1	T14G8.1	M142.1
B0273.4	C27A12.2	NA	NA	NA	NA	NA	T14B4.6	F52A8.6	C14B1.4	C35D6.4	EEED8.8	F35D11.3	F35E2.9	F56A8.5	NA	NA	F12E12.4	F14F7.1	F20D12.6	C33D9.1	C30A5.10	C08E3.10	C08B6.3	C40C9.5	C44B9.6	F07E5.2	F57C7.3	NA	F32B5.8	R09F10.4	NA	K10G9.1	C39D10.11	C27B7.9	F07C3.8	C17E7.9	Y61A9LA.3	Y87G2A.17	NA	T12B3.4	R90.1	Y58G8A.1	F16H11.1	C30D11.1	F52D2.7	K05F6.7	F36H5.11	T16G12.5	M163.3
B0280.1	C27A12.3	NA	NA	NA	NA	NA	T14B4.7	F52B5.7	C14B1.9	C35E7.8	F01F1.1	F35E2.8	F35G12.8	F56A8.6	NA	NA	F12E12.5	F15A2.2	F20D6.11	C33F10.5	C30D11.1	C08E3.11	C08B6.4	C41C4.12	C44C10.8	F07F6.8	F59A6.1	NA	F32B6.1	R10F2.1	NA	K10H10.12	C39D10.2	C27D9.2	F07D3.2	C17F4.5	Y66D12A.24	Y8G1A.2	NA	T13C5.7	T01B4.3	Y62E10A.16	F17A9.3	C30F2.1	F52G2.2	K05F6.8	F36H5.8	T19B4.4	M163.4
B0280.10	C27A12.8	NA	NA	NA	NA	NA	T14F9.4	F52C12.5	C14C10.5	C36A4.5	F01F1.12	F35G2.3	F35H10.1	F56B3.5	NA	NA	F12E12.7	F15B9.1	F20H11.5	C33G3.1	C30E1.3	C08E8.10	C08E3.1	C41C4.3	C44C8.6	F08A8.1	F59A6.5	NA	F32B6.8	R13H8.1	NA	K11D12.4	C39D10.8	C27F2.4	F07E5.5	C17G10.1	Y67D8A.2	Y92H12A.1	NA	T13F3.2	T01B6.1	Y67A6A.2	F17C11.6	C30F8.2	F53A2.2	K06G5.2	F36H5.9	T20D4.19	R04A9.4
B0280.11	C27A2.3	NA	NA	NA	NA	NA	T14G10.2	F52C9.5	C14C11.2	C36B1.12	F01F1.3	F36A4.14	F36D3.1	F58A4.3	NA	NA	F12E12.8	F15C11.1	F21D9.4	C33H5.18	C30E1.7	C08E8.9	C08E3.10	C41C4.5	C44C8.7	F08B12.2	F59C12.3	NA	F32D1.3	R144.7	NA	K11G9.4	C39E6.6	C27H5.4	F08B1.2	C17G10.2	Y71A12B.12	ZC449.3	NA	T13H5.6	T01D3.7	Y67D8C.9	F17H10.3	C30G12.1	F53A2.7	K07A1.11	F37B4.10	T20F5.7	R04A9.9
B0280.12	C27A7.6	NA	NA	NA	NA	NA	T14G10.5	F52D2.7	C14C11.6	C36B1.4	F01G4.2	F36H5.11	F36F2.4	F58A4.4	NA	NA	F12E12.9	F15G9.5	F21E9.3	C34B4.1	C30F2.1	C08F1.4	C08E3.13	C41G11.3	C44H4.5	F08C6.2	F59D12.4	NA	F33G12.3	R148.5	NA	LLC1.1	C39E9.7	C27H5.5	F08B12.5	C17H11.2	Y71G12B.20	ZC449.7	NA	T14B4.6	T01G1.1	Y70C5C.1	F18A11.2	C31H5.3	F53B7.3	K07A1.12	F37D6.4	T20F7.1	R05D11.5
B0280.13	C27B7.5	NA	NA	NA	NA	NA	T16G12.1	F52E10.5	C14C11.7	C36B1.7	F02D10.6	F36H5.9	F36G3.2	F59A7.4	NA	NA	F12F6.8	F16C3.3	F21F3.7	C34D1.3	C30F8.3	C08F1.8	C08E8.1	C42D8.9	C45E1.1	F08C6.3	F59F5.6	NA	F35G12.6	R166.5	NA	M01E11.7	C39H7.6	C27H5.7	F08F1.1	C17H12.1	Y74C10AR.3	ZC455.10	NA	T14B4.7	T02G6.2	Y71F9B.9	F18C5.5	C31H5.5	F53F8.3	K08A2.4	F38A5.7	T22C1.11	R05D3.8
B0280.17	C27B7.8	NA	NA	NA	NA	NA	T19A5.2	F52E4.6	C14F11.1	C36C9.1	F02E9.9	F37D6.4	F36H5.11	F59E12.10	NA	NA	F13B12.1	F16F9.1	F21H7.4	C34E11.1	C30H6.10	C08F11.1	C08E8.10	C44B11.3	C45G7.4	F08C6.6	H01M10.1	NA	F35G2.4	R31.1	NA	M02D8.4	C40A11.8	C28D4.10	F08F3.7	C17H12.13	Y75B8A.6	ZC518.2	NA	T14G10.2	T04G9.1	Y73B6BL.39	F18C5.9	C32E12.5	F53G2.6	K08D10.3	F38E9.1	T22C8.3	R05G6.4
B0280.3	C27C12.1	NA	NA	NA	NA	NA	T20D3.11	F52F10.2	C15C6.4	C36C9.2	F02H6.1	F38A5.7	F36H5.5	H01M10.1	NA	NA	F13D12.3	F16F9.4	F21H7.5	C34E11.3	C31B8.2	C08F11.13	C08E8.5	C44B12.2	C46C11.2	F08F1.5	H04D03.1	NA	F35H10.7	SSSD1.1	NA	M02F4.8	C41C4.1	C28G1.5	F08G2.8	C17H12.2	Y75B8A.8	ZK1067.6	NA	T16H12.5	T05C1.3	Y73F8A.5	F20C5.2	C32E8.3	F53G2.7	K08E3.6	F38H4.2	T23C6.1	R05H10.2
B0280.4	C27C12.3	NA	NA	NA	NA	NA	T20F10.1	F52H2.1	C15F1.3	C36E8.5	F07B7.2	F38E9.1	F36H5.8	H06H21.11	NA	NA	F13E9.6	F17A9.3	F22D6.1	C34E11.7	C31H2.1	C08F11.5	C08F1.4	C44C1.5	C46C11.4	F08G2.1	H13N06.3	NA	F35H8.6	T01B6.3	NA	M02H5.3	C41D11.1	C29F5.4	F08G5.7	C18A3.1	ZC262.3	ZK1236.3	NA	T19A5.2	T07D1.5	Y75B12B.6	F20D1.7	C33A12.13	F54A3.3	K08H2.2	F39F10.4	T23D8.9	R06C1.4
B0280.5	C27C7.1	NA	NA	NA	NA	NA	T20H12.1	F53A9.4	C15F1.6	C37C3.1	F08B4.7	F38H4.2	F36H5.9	H23N18.1	NA	NA	F13H8.11	F18C12.1	F22D6.12	C34E7.1	C32B5.11	C08F11.8	C08F11.13	C44C1.6	C46H11.2	F08G2.2	H17B01.1	NA	F36D4.5	T01D1.2	NA	M02H5.4	C41D11.6	C29F5.8	F09A5.2	C18E3.5	ZC395.7	ZK1240.3	NA	T19B10.5	T07H8.6	Y76A2B.2	F20D12.3	C33A12.2	F54D5.11	K09E3.5	F39G3.3	T23E1.2	R06C7.6
B0280.7	C27D6.4	NA	NA	NA	NA	NA	T22F7.3	F53B1.6	C15F1.7	C37C3.9	F08D12.10	F39B2.10	F37A4.8	H23N18.2	NA	NA	F14B6.1	F18E3.7	F22E5.4	C34F6.1	C32D5.1	C08G5.4	C08F11.5	C44C10.6	C46H3.2	F08G2.7	H23N18.1	NA	F37C4.4	T01D3.3	NA	M02H5.5	C41D11.8	C29G2.6	F09B9.4	C18E3.8	ZC404.3	ZK287.6	NA	T20D3.11	T08H4.1	Y80D3A.5	F20D6.10	C33D9.10	F54E7.5	K09F5.5	F42A9.2	T24B8.2	R07C3.2
B0280.8	C27D9.1	NA	NA	NA	NA	NA	T22F7.5	F53H4.5	C15H11.4	C38C10.2	F08D12.11	F39F10.2	F37B1.5	H27M09.2	NA	NA	F14B6.3	F18F11.3	F22F4.4	C35A5.3	C32D5.6	C08G9.1	C08F11.8	C45B11.4	C47C12.3	F08G5.5	H43I07.3	NA	F38A1.10	T04C9.6	NA	M03A8.4	C41G6.9	C29H12.1	F09C12.1	C18E3.9	ZC434.7	ZK337.4	NA	T22E5.7	T09A12.4	ZC101.3	F20D6.11	C33G3.1	F54H12.6	K10G6.3	F43C11.10	T24B8.3	R07E5.3
B0280.9	C27F2.5	NA	NA	NA	NA	NA	T23F1.5	F54B11.10	C15H11.5	C38C3.10	F08D12.6	F39F10.3	F37C12.7	H43I07.2	NA	NA	F14D2.6	F18G5.6	F22F7.3	C35C5.10	C32E12.2	C09B8.8	C08G9.1	C45B2.8	C47D12.4	F09B12.2	JC8.4	NA	F38A5.2	T05A7.3	NA	M04C9.5	C42C1.1	C30E1.6	F09E8.8	C18E9.10	ZC506.1	ZK381.5	NA	T22E7.1	T09D3.3	ZC123.4	F20D6.3	C33H5.18	F55C5.4	K12C11.1	F44B9.3	T24B8.7	R08E3.3
B0281.3	C27F2.7	NA	NA	NA	NA	NA	T25B2.4	F54C1.5	C15H11.6	C38D4.1	F08D12.8	F39F10.4	F37C4.6	JC8.4	NA	NA	F14E5.4	F19B2.6	F23B2.5	C35D10.12	C32E12.3	C09B9.8	C08H9.1	C45E1.4	C47D12.5	F09B9.3	K02D7.1	NA	F38E1.7	T05G5.1	NA	M110.1	C42C1.11	C30E1.7	F09G8.3	C18E9.11	ZC506.3	ZK484.3	NA	T23D5.10	T10D4.6	ZC13.1	F20G2.3	C34B2.9	F55C9.14	K12C11.2	F44E2.3	T24C4.2	R08F11.1
B0281.4	C27F2.8	NA	NA	NA	NA	NA	T26C12.1	F54C9.6	C15H11.7	C39B5.6	F08D12.9	F40G9.12	F38A5.7	JC8.7	NA	NA	F14H12.6	F19G12.9	F23F12.8	C35D10.2	C32E8.6	C09E7.10	C08H9.5	C45G7.2	C47E12.8	F09C3.4	K02E10.2	NA	F39G3.1	T11B7.2	NA	M28.7	C42D4.4	C30F12.5	F10D7.3	C18G1.5	ZK1067.2	ZK484.4	NA	T23E7.5	T10H10.1	ZC247.2	F21E9.2	C34B7.1	F55G1.4	K12D12.1	F44G3.14	T24C4.7	R10E4.9
B0281.5	C27F2.9	NA	NA	NA	NA	NA	T26C12.4	F54E2.2	C16A11.10	C39E9.11	F08F8.9	F40G9.14	F38E9.1	K01G5.2	NA	NA	F14H3.10	F19H6.1	F23H12.5	C35E7.11	C32H11.11	C09E7.2	C09B7.1	C45H4.1	C47G2.2	F09C3.5	K02E7.6	NA	F40E10.1	T12A2.9	NA	M28.8	C43G2.1	C30F12.7	F10D7.4	C18H9.2	ZK1251.9	ZK512.5	NA	T24D8.3	T12A2.9	ZC443.3	F21G4.4	C34C6.3	F55G1.9	K12D12.2	F45C12.13	T25G12.5	R12E2.12
B0281.6	C27H6.9	NA	NA	NA	NA	NA	T26E4.3	F54F2.5	C16A11.2	C39E9.13	F08G12.2	F40H6.4	F38H4.2	K02B2.1	NA	NA	F14H3.4	F19H6.7	F25E2.1	C35E7.2	C32H11.4	C09E7.3	C09B8.1	C45H4.8	C48B6.9	F09C8.2	K02F3.2	NA	F40F8.7	T14B4.5	NA	R02F2.2	C43H8.1	C30G7.2	F11A5.10	C18H9.3	ZK1290.8	ZK669.2	NA	T24D8.4	T13C5.3	ZC84.2	F21H7.10	C34D1.3	F56A3.1	K12H6.11	F45C12.6	T26H2.2	R12E2.13
B0284.1	C28A5.1	NA	NA	NA	NA	NA	T27A10.6	F54F2.8	C16A11.4	C39E9.14	F09C3.3	F41E6.13	F39B2.2	K02F3.10	NA	NA	F15B10.2	F19H8.3	F25E2.4	C35E7.4	C32H11.8	C09E8.2	C09B8.8	C46A5.4	C48D1.1	F09E5.13	K02G10.6	NA	F40F9.1	T15H9.7	NA	R03E1.3	C44C3.1	C30H6.10	F11A5.12	C23G10.4	ZK154.4	ZK673.4	NA	T24E12.2	T14B1.1	ZK1053.3	F22A3.7	C34E11.2	F56B3.4	M01D1.8	F45D11.12	T26H2.6	R12H7.3
B0284.2	C28C12.12	NA	NA	NA	NA	NA	T27B1.1	F55A12.5	C16A11.6	C41C4.4	F09E5.16	F42A10.9	F39F10.4	K02F3.11	NA	NA	F16G10.6	F19H8.5	F25E5.8	C36B7.8	C33A11.4	C09F12.1	C09B9.8	C46E1.3	C49A1.4	F09F7.6	K03D10.1	NA	F40F9.5	T16A1.1	NA	R05H11.2	C44C3.9	C30H6.12	F11C1.4	C24B5.2	ZK265.4	ZK757.4	NA	T25G12.2	T14G10.5	ZK1320.4	F22B5.3	C34G6.1	F56C11.4	M01D7.9	F45D11.13	T27C4.4	R12H7.5
B0284.3	C28C12.2	NA	NA	NA	NA	NA	T27C10.6	F55A4.8	C16A11.8	C41C4.6	F10D2.10	F42A9.2	F40F4.1	K03E5.3	NA	NA	F17A2.13	F20C5.2	F25G6.7	C36C9.5	C33B4.5	C09F12.3	C09E7.10	C46F4.3	C49H3.6	F10B5.7	K04C2.2	NA	F41E6.6	T19B4.1	NA	R07C12.2	C44C8.6	C30H6.2	F11E6.11	C24D10.4	ZK512.1	ZK770.3	NA	T25G12.4	T15B7.17	ZK250.9	F22E12.2	C35A5.1	F56C3.6	M01E5.6	F45E6.6	T27F6.10	R13A1.10
B0284.4	C28D4.2	NA	NA	NA	NA	NA	T27C4.2	F55F8.1	C16C10.1	C41D11.5	F10D2.6	F42G9.1	F40F8.12	K04C2.4	NA	NA	F17A2.5	F20D12.3	F26A1.3	C37H5.2	C33C12.3	C09F9.3	C09E7.3	C46H11.1	C50F4.11	F10C1.9	K04H4.6	NA	F41E7.2	T19D7.6	NA	R07E3.7	C44F1.1	C31B8.4	F11F1.4	C24D10.5	ZK899.2	ZK792.7	NA	T27B7.7	T16G1.8	ZK616.9	F22F4.1	C35D10.12	F56C9.1	M03C11.7	F45F2.2	T28C6.10	R186.3
B0285.1	C28D4.3	NA	NA	NA	NA	NA	T28C6.7	F55G1.5	C16C10.10	C41G7.1	F10D2.7	F42G9.4	F40G12.4	K04H4.6	NA	NA	F17A9.4	F20D6.10	F26D10.11	C38C3.2	C33C12.8	C09G4.2	C09E8.2	C46H11.4	C50F4.5	F10C2.5	K06C4.12	NA	F41H10.5	T19H12.9	NA	R09F10.4	C45E1.1	C31B8.8	F11F1.5	C24D10.6	ZK899.3	NA	NA	T28F12.1	T19C3.4	ZK643.10	F22F7.6	C35E7.11	F56D2.6	M03D4.1	F45H11.2	T28F2.4	T02H6.8
B0285.3	C29A12.1	NA	NA	NA	NA	NA	T28F12.2	F56D1.1	C16C10.11	C41G7.2	F10D2.9	F43C11.10	F42A10.9	K05C4.9	NA	NA	F17A9.5	F20D6.11	F26E4.3	C38C3.4	C33D12.2	C09G5.1	C09F12.1	C47A10.12	C50F4.6	F10D2.12	K06C4.13	NA	F42A10.2	T20D3.11	NA	R10F2.1	C45E1.4	C31C9.7	F12A10.5	C24F3.1	ZK909.4	NA	NA	T28H11.2	T20B5.1	ZK813.5	F25D1.4	C35E7.2	F56F11.4	M03F8.3	F46A9.6	VF39H2L.1	T04A8.12
B0285.4	C29E4.13	NA	NA	NA	NA	NA	T28F3.5	F56D5.1	C16C10.3	C41G7.4	F10D7.3	F44A2.1	F42F12.4	K06C4.11	NA	NA	F17A9.6	F21C10.3	F26F12.8	C38C5.1	C33D12.3	C09G9.5	C09F9.3	C47A10.6	C50H2.5	F10D2.8	K06C4.4	NA	F42D1.2	T21G5.3	NA	R11.3	C45E5.3	C31H5.1	F13D11.1	C24G6.1	NA	NA	NA	W01A8.3	T20G5.1	ZK813.6	F25E2.4	C36B1.1	F56F3.1	M04F3.1	F47D12.5	VH15N14R.1	T04D3.5
B0285.5	C29E4.8	NA	NA	NA	NA	NA	W01C8.3	F56H1.1	C16C10.6	C41H7.3	F10D7.5	F44A2.7	F42G9.4	K06C4.3	NA	NA	F18A1.5	F21C10.7	F27B10.1	C38C6.6	C33D12.6	C09G9.8	C09G1.5	C47C12.6	C51E3.2	F10D7.2	K07A1.8	NA	F42G2.2	T21G5.5	NA	R12C12.5	C45G9.11	C31H5.6	F13E9.14	C24H11.5	NA	NA	NA	W01C8.4	T20H12.1	ZK829.3	F25G6.3	C36B7.5	F56F4.8	M142.8	F47G3.3	VK10D6R.1	T05A7.4
B0285.6	C29H12.1	NA	NA	NA	NA	NA	W01F3.3	F57B1.6	C16C10.7	C41H7.6	F10E7.1	F44F1.7	F43D9.6	K07A1.11	NA	NA	F18A12.6	F21D5.3	F28A12.4	C38H2.2	C33G3.1	C09H10.8	C09G4.2	C48A7.1	C52A10.2	F10E9.8	K07A12.4	NA	F42G2.3	T21H8.5	NA	R13H4.1	C45G9.14	C31H5.7	F13E9.15	C25A1.12	NA	NA	NA	W01C8.5	T21B4.3	NA	F26B1.4	C36B7.8	F56G4.4	M151.1	F49B2.1	W01B6.9	T06E6.1
B0285.7	C29H12.5	NA	NA	NA	NA	NA	W02B8.3	F57B7.4	C16C2.4	C43E11.2	F10E9.3	F44G3.14	F44A2.7	K08B4.1	NA	NA	F19B10.9	F21F12.1	F28F5.4	C39E9.3	C34C6.3	C09H5.4	C09G5.1	C48A7.2	C52A10.3	F11A10.7	K07E3.4	NA	F43B10.1	T22A3.8	NA	R31.3	C45H4.1	C32C4.2	F13G11.1	C25A1.13	NA	NA	NA	W01D2.2	T21B6.5	NA	F26D2.15	C36C9.5	F57B10.10	M151.5	F49B2.2	W02A11.3	T07C4.8
B0285.8	C30B5.1	NA	NA	NA	NA	NA	W02B8.6	F57F5.4	C16C8.11	C44B7.10	F10G2.4	F45C12.13	F44B9.6	K08F4.2	NA	NA	F19F10.1	F21F3.5	F28H1.2	C39H7.4	C34C6.7	C10C5.2	C09G5.4	C48B4.12	C52B11.2	F11A3.1	K07H8.9	NA	F43G9.11	T22G5.5	NA	R53.3	C45H4.11	C32F10.8	F14B4.3	C25A1.3	NA	NA	NA	W01F3.3	T21H8.1	NA	F26F12.4	C36H8.2	F57B10.11	M18.7	F49H12.1	W02B8.2	T08B2.8
B0285.9	C30C11.2	NA	NA	NA	NA	NA	W02C12.1	F58F12.4	C16C8.12	C44B7.12	F11D11.12	F45C12.5	F45C12.11	K08H2.1	NA	NA	F19F10.5	F21H7.14	F29B9.12	C40A11.1	C34D1.1	C10C5.7	C09G9.8	C48D5.2	C52D10.7	F11A6.1	K08A8.2	NA	F44E5.3	T23B5.3	NA	T01B10.4	C45H4.2	C33A12.19	F14D12.4	C25A1.5	NA	NA	NA	W02B9.1	T22F7.5	NA	F26G1.10	C37A5.11	F57C2.5	M28.5	F52A8.1	W02D7.6	T09A5.6
B0286.1	C30C11.4	NA	NA	NA	NA	NA	W03D8.6	F58F6.1	C16C8.14	C44B9.3	F11E6.7	F45C12.6	F45C12.12	K09F6.8	NA	NA	F19F10.6	F21H7.3	F29C6.1	C40C9.2	C34D1.3	C10C6.2	C09H5.4	C49C3.11	C52D10.8	F11A6.2	K08A8.3	NA	F44G3.2	T24F1.3	NA	T01B10.5	C45H4.8	C33A12.7	F14D12.5	C25A1.8	NA	NA	NA	W02C12.1	T23F1.5	NA	F27C8.2	C37C3.11	F58A4.10	R01B10.2	F52B11.5	W03H9.2	T10B5.6
B0286.2	C30F12.2	NA	NA	NA	NA	NA	W03F11.6	F59A3.2	C16C8.16	C44B9.4	F11H8.1	F45E6.6	F45C12.13	K09H9.2	NA	NA	F20B6.9	F21H7.4	F30B5.1	C40C9.5	C34D4.8	C10E2.2	C09H5.5	C49C3.13	C52D10.9	F11C1.1	K08C7.3	NA	F45E10.2	T25D10.2	NA	T01C8.5	C46A5.6	C33E10.8	F14D7.5	C25A11.2	NA	NA	NA	W03B1.2	T24D11.1	NA	F28F9.4	C38C10.6	F58B3.7	R01H10.1	F52B5.7	W05H12.2	T10C6.13
B0286.3	C30F12.4	NA	NA	NA	NA	NA	W04G3.2	F59C6.8	C16C8.20	C44E4.3	F12D9.2	F45H11.2	F45C12.15	K10C2.4	NA	NA	F21D9.1	F22D6.11	F30H5.3	C40D2.3	C34E7.1	C10F3.6	C10C5.2	C49C3.4	C52E2.1	F11C1.5	K08E3.8	NA	F45E6.2	T27B7.6	NA	T01D3.2	C46F9.3	C33G8.13	F14H8.2	C25D7.8	NA	NA	NA	W03F11.5	T25B2.3	NA	F28G4.4	C38C3.2	F58E1.13	R02C2.1	F52D2.8	W05H9.2	T12B5.4
B0286.4	C30G12.6	NA	NA	NA	NA	NA	W04G3.8	F59E12.13	C16C8.4	C44E4.4	F12E12.1	F46A9.6	F45C12.4	K10C3.4	NA	NA	F21D9.2	F22E10.5	F31D4.4	C40H1.8	C34F11.3	C10F3.7	C10C5.7	C49D10.2	C52E2.7	F11C1.6	K08H2.1	NA	F45E6.3	T27C10.6	NA	T01D3.3	C46H11.10	C33G8.5	F15A4.5	C25H3.3	NA	NA	NA	W03G9.1	T26C12.1	NA	F29G6.2	C38C3.6	F58E10.5	R02C2.2	F52E10.1	W05H9.4	T12D8.2
B0286.5	C30G12.7	NA	NA	NA	NA	NA	W05B2.2	H02I12.4	C16C8.5	C44E4.5	F12E12.10	F46G10.3	F45C12.5	K10C9.3	NA	NA	F22B7.13	F23B2.4	F31D4.5	C41A3.2	C34F6.1	C10G8.3	C10C6.2	C49F5.7	C52E2.8	F11C3.1	K08H2.8	NA	F45H10.5	T28A11.15	NA	T02C1.2	C46H11.4	C33G8.6	F15A8.5	C25H3.4	NA	NA	NA	W04C9.3	T27A10.6	NA	F30A10.8	C38C5.1	F58E6.6	R02D3.3	F53A2.3	W06E11.2	T12E12.3
B0286.6	C30H6.7	NA	NA	NA	NA	NA	W05B2.4	H04M03.4	C17B7.11	C44E4.6	F12E12.4	F47B10.9	F45C12.6	K11C4.4	NA	NA	F22B8.7	F23F1.7	F31D4.8	C41G11.3	C35A11.1	C11D2.2	C10E2.4	C49G7.3	C53A5.3	F11E6.1	K09A9.3	NA	F46B6.6	T28F12.3	NA	T02G5.2	C47A10.11	C33H5.1	F15B9.1	C25H3.6	NA	NA	NA	W04G3.1	T27B1.1	NA	F31D4.4	C38C6.2	F58E6.8	R04A9.2	F53C3.11	W07E6.1	T13B5.8
B0294.1	C31B8.12	NA	NA	NA	NA	NA	W05B5.4	H14A12.3	C17C3.7	C44F1.3	F12E12.5	F47C12.8	F45C12.7	K12H4.4	NA	NA	F22E5.12	F23F12.8	F32A11.7	C41G6.2	C35D10.2	C11D2.6	C10F3.7	C49G9.2	C53C7.3	F13A7.13	K09C8.5	NA	F46E10.9	VC5.2	NA	T04A11.2	C47A10.6	C33H5.11	F16B4.11	C25H3.7	NA	NA	NA	W04G3.2	T27C4.2	NA	F31F6.5	C38C6.3	F58F6.4	R06A4.6	F53H1.4	W08E3.2	T13C5.6
B0302.1	C31H1.8	NA	NA	NA	NA	NA	W05H5.3	H27A22.1	C17D12.1	C45H4.10	F12E12.7	F47D12.9	F45D11.13	K12H6.6	NA	NA	F22E5.16	F25D1.3	F32A5.4	C42C1.2	C35E7.11	C11D9.1	C11D9.1	C50A2.3	C53D5.5	F13C5.2	K09E4.2	NA	F46F11.6	W01C8.3	NA	T04A11.5	C47B2.1	C34B2.11	F16B4.6	C25H3.9	NA	NA	NA	W05B5.1	T28F3.5	NA	F31F6.8	C38D9.2	F58G4.4	R06A4.9	F53H2.3	W10D9.1	T13F2.3
B0302.2	C32A3.1	NA	NA	NA	NA	NA	W06F12.2	H27M09.2	C17E4.3	C45H4.14	F12E12.8	F47H4.10	F45D11.5	M01A10.3	NA	NA	F22G12.3	F25D7.3	F32A7.5	C42C1.7	C35E7.2	C11E4.8	C11G10.1	C50B6.11	C53H9.2	F13D11.1	K09H11.1	NA	F46H5.4	W01C8.4	NA	T04A11.7	C47B2.7	C34C12.7	F16F9.5	C26B2.7	NA	NA	NA	W05G11.4	T28F4.1	NA	F32A5.6	C39B10.6	F59A3.9	R06B10.5	F53H8.3	W10D9.2	T13G4.4
B0302.4	C32A3.3	NA	NA	NA	NA	NA	W07A12.6	H27M09.4	C17E4.4	C45H4.17	F12E12.9	F48A11.5	F45E4.6	M01D1.10	NA	NA	F23B12.8	F26D10.9	F32B4.5	C42D4.1	C36B7.8	C11G10.2	C12C8.1	C50C10.1	C54D1.5	F13E6.1	K10C3.4	NA	F46H6.2	W01F3.3	NA	T04C9.6	C47C12.6	C34D1.2	F16G10.15	C26D10.1	NA	NA	NA	W05H5.4	W01A11.3	NA	F33D4.1	C39D10.6	F59B1.10	R06C7.8	F54C4.4	Y102A11A.8	T13H5.5
B0302.5	C32D5.11	NA	NA	NA	NA	NA	W09B6.1	H41C03.1	C17E4.6	C46A5.6	F12F6.8	F48E3.6	F45E6.6	M01D7.6	NA	NA	F23D12.4	F26D11.12	F32B4.8	C42D4.13	C36C9.5	C12D8.16	C12D12.2	C50C3.12	C54F6.11	F13H8.2	M01B2.10	NA	F47G4.3	W03D8.3	NA	T04F8.9	C47D12.5	C34D1.4	F16H6.10	C26E6.11	NA	NA	NA	W06A7.3	W01C8.3	NA	F34D6.3	C39F7.4	F59B1.8	R07C3.12	F54E12.1	Y105C5A.10	T14F9.5
B0303.11	C32E8.8	NA	NA	NA	NA	NA	Y105C5A.24	H42K12.3	C17E7.3	C46A5.9	F13A2.4	F48E8.2	F45H11.2	M04B2.3	NA	NA	F23F12.4	F26E4.3	F32D1.11	C42D8.1	C36H8.3	C12D8.21	C12D8.13	C50D2.6	C54G7.2	F14F3.2	M01F1.9	NA	F47G4.6	W03F11.6	NA	T05C12.4	C47D2.1	C34D1.5	F16H6.5	C26E6.12	NA	NA	NA	W09G10.4	W01C9.1	NA	F35A5.5	C40C9.5	F59E10.2	R07C3.15	F54E12.3	Y105C5A.1268	T14G10.4
B0303.14	C32F10.1	NA	NA	NA	NA	NA	Y105E8A.25	JC8.13	C17E7.4	C46E10.8	F13D12.10	F49B2.2	F47B7.2	M142.1	NA	NA	F25B5.2	F27C8.1	F32D8.12	C42D8.4	C38C10.1	C12D8.5	C12D8.14	C50E10.3	C55A6.2	F14F4.3	M03A1.6	NA	F49E12.1	W03F8.10	NA	T05E11.3	C47E12.1	C34D4.11	F17A9.5	C26E6.5	NA	NA	NA	Y105C5B.21	W01C9.3	NA	F35C8.3	C40H5.4	F59G1.8	R07C3.6	F54F7.1	Y105C5B.9	T15B7.15
B0303.15	C32F10.8	NA	NA	NA	NA	NA	Y105E8A.29	K01A2.5	C17E7.6	C46E10.9	F13D12.3	F49C12.11	F47D12.5	M142.8	NA	NA	F25B5.7	F27C8.2	F32D8.7	C43C3.1	C38C3.2	C13A10.1	C12D8.15	C50F7.5	C55A6.5	F14H3.11	M03F4.7	NA	F49E12.6	W03F9.4	NA	T07A9.3	C47E8.5	C34E11.4	F17C11.2	C26E6.7	NA	NA	NA	Y106G6E.5	W02B8.3	NA	F35C8.6	C40H5.7	H04D03.4	R07C3.8	F54H12.5	Y119C1B.5	T16G1.10
B0303.2	C33B4.4	NA	NA	NA	NA	NA	Y105E8B.9	K01D12.7	C17E7.9	C46F11.2	F13E9.6	F49H6.5	F48E3.6	M163.3	NA	NA	F25F2.1	F27D9.8	F32E10.3	C43F9.10	C38C3.9	C13A10.2	C12D8.16	C50H11.4	C55B6.2	F15A4.2	M04G12.4	NA	F49E8.6	W06H8.6	NA	T07C12.9	C48B4.6	C34E7.1	F18C12.2	C26F1.3	NA	NA	NA	Y110A2AL.4	W03B1.1	NA	F35D2.1	C41C4.10	H14E04.5	R07E4.3	F55C9.11	Y17G9B.2	T19B4.3
B0303.3	C33C12.9	NA	NA	NA	NA	NA	Y106G6G.2	K02C4.4	C17F4.5	C46F11.4	F13G3.2	F52B5.5	F49B2.1	R01H10.1	NA	NA	F25H2.10	F28F5.3	F35A5.5	C43F9.9	C38C6.3	C13A2.3	C12D8.17	C50H2.1	C55C2.1	F15B10.3	M142.4	NA	F52B11.3	W09B6.1	NA	T07D1.2	C48B6.6	C34E7.3	F18C12.3	C27A12.2	NA	NA	NA	Y116F11B.2	W03D8.6	NA	F35D2.2	C41C4.5	H20J04.8	R09B3.4	F55C9.13	Y18D10A.4	T20C4.1
B0303.4	C33F10.14	NA	NA	NA	NA	NA	Y110A2AL.8	K02E10.2	C17G10.1	C47B2.3	F13H8.11	F52B5.7	F49B2.2	R03A10.6	NA	NA	F26A1.12	F28G4.4	F35C8.3	C43H6.6	C38D9.5	C13B9.4	C12D8.19	C50H2.10	C55C2.3	F16B4.8	M163.1	NA	F52C9.1	W10C8.2	NA	T08H4.3	C48D1.3	C34F6.11	F18F11.5	C27A12.3	NA	NA	NA	Y11D7A.4	W03G11.4	NA	F35D2.4	C41G11.1	H35B03.2	R09B3.5	F55C9.4	Y23H5B.1	T20D3.6
B0303.7	C33F10.4	NA	NA	NA	NA	NA	Y111B2A.4	K02G10.5	C17G10.2	C47B2.4	F14B6.1	F52D2.2	F49B2.7	R04A9.7	NA	NA	F26A1.2	F29G9.4	F35D11.1	C43H6.9	C38H2.1	C13C12.1	C12D8.21	C50H2.12	D1009.1	F16G10.9	M163.3	NA	F52C9.3	W10C8.5	NA	T09A5.1	C49A9.7	C35A11.1	F19C6.3	C27A12.8	NA	NA	NA	Y15E3A.1	W04D12.1	NA	F36F12.1	C41G11.3	H42K12.1	R10E4.4	F55C9.6	Y34B4A.11	T21B6.1
B0303.8	C33H5.19	NA	NA	NA	NA	NA	Y113G7A.3	K04C1.3	C17H11.2	C47B2.5	F14B6.3	F52D2.4	F49H6.5	R05F9.9	NA	NA	F26D2.16	F31C3.6	F35H10.4	C44B11.1	C39E9.3	C13C4.7	C12D8.5	C51E3.7	D1025.2	F17A9.5	R02D3.1	NA	F52D1.1	Y105E8A.23	NA	T10H9.4	C49A9.8	C35A5.2	F19F10.4	C27A2.1	NA	NA	NA	Y18H1A.4	W04G3.3	NA	F37C4.4	C41G7.7	H43I07.2	R10E4.6	F55C9.7	Y34D9A.4	T23B12.2
B0303.9	C34B2.2	NA	NA	NA	NA	NA	Y16B4A.1	K04D7.2	C17H12.1	C47B2.6	F14D2.11	F52D2.6	F52B11.5	R06F6.1	NA	NA	F26D2.7	F31D4.8	F35H12.7	C44B12.2	C39H7.4	C13D9.1	C12D8.6	C52A11.4	D1037.3	F17C11.1	R03G5.1	NA	F52D2.7	Y105E8A.24	NA	T13C2.3	C49G7.10	C35A5.6	F19G12.4	C27A2.3	NA	NA	NA	Y38C1AA.5	W04G3.8	NA	F38A6.4	C42D4.13	K01G5.7	R11.4	F55C9.8	Y37E11B.2	T23B12.3
B0304.1	C34B2.5	NA	NA	NA	NA	NA	Y16B4A.2	K04F10.3	C17H12.13	C47D12.6	F14D2.13	F52D2.7	F52B5.5	R07A4.3	NA	NA	F26D2.9	F31F4.1	F35H8.5	C44B7.4	C40A11.1	C13F10.1	C13A10.1	C52B11.4	D1044.1	F17C11.17	R03G5.2	NA	F52E1.13	Y105E8A.3	NA	T13H5.6	C49G7.6	C35B8.3	F19G12.8	C27B7.1	NA	NA	NA	Y38F2AL.1	W05B2.4	NA	F38B6.3	C42D8.4	K03H1.7	R119.6	F55G7.2	Y37E11B.4	T24A6.20
B0304.2	C34B2.7	NA	NA	NA	NA	NA	Y17G7B.10	K05F1.5	C17H12.2	C47E8.4	F14H12.6	F52D2.8	F52D2.8	R07C3.2	NA	NA	F26F4.10	F31F6.6	F36F2.2	C44B7.5	C40C9.2	C14A11.6	C13A10.2	C52E12.2	D1069.4	F17C11.4	R05D11.1	NA	F52E1.9	Y111B2A.4	NA	T14B4.6	C49H3.4	C35B8.4	F19H6.1	C27B7.5	NA	NA	NA	Y38F2AL.2	W05H5.3	NA	F38B6.6	C43C3.1	K04C2.6	R13F6.1	F56E10.1	Y38A8.3	T24C2.3
B0304.3	C34B4.2	NA	NA	NA	NA	NA	Y20F4.4	K06A1.3	C18A3.1	C47E8.8	F14H3.3	F52E10.1	F52E10.1	R07E5.3	NA	NA	F27B3.6	F31F6.8	F36H1.3	C44C11.1	C40C9.4	C14A11.7	C13B9.4	C53A5.4	D2005.1	F17E9.10	R05F9.10	NA	F52H2.7	Y111B2A.8	NA	T14B4.7	C50C10.4	C35C5.10	F20A1.2	C27B7.8	NA	NA	NA	Y38H6A.5	W06A11.1	NA	F38B6.7	C43F9.9	K04G2.1	R144.2	F57G9.3	Y39F10C.2	T25B9.8
B0304.4	C34B7.2	NA	NA	NA	NA	NA	Y24D9A.7	K06A4.3	C18E3.5	C47G2.5	F15A4.10	F53B3.1	F53A2.4	R07H5.8	NA	NA	F27D9.5	F32A11.7	F38A1.14	C44E12.3	C40C9.5	C14A4.9	C13C12.1	C53B7.6	D2021.1	F17E9.13	R07A4.3	NA	F52H3.1	Y113G7A.6	NA	T14D7.2	C50C10.8	C35C5.2	F20C5.1	C27C12.1	NA	NA	NA	Y38H6C.16	W06F12.2	NA	F38E11.4	C43H6.3	K04G2.5	R151.9	F58A4.4	Y39G10AR.13	T26A5.7
B0304.6	C34C12.8	NA	NA	NA	NA	NA	Y37A1C.1	K06A5.7	C18E3.6	C48B4.10	F15A4.2	F53C3.11	F53C3.11	R09F10.8	NA	NA	F28C6.1	F32A6.2	F38G1.1	C44F1.5	C40D2.2	C14A6.1	C13C4.7	C53C7.3	D2024.2	F18C5.10	R07B1.1	NA	F53A2.9	Y22D7AL.14	NA	T14F9.4	C50D2.10	C35C5.8	F20D1.4	C27C12.3	NA	NA	NA	Y39B6A.7	W07A12.6	NA	F38E11.9	C44B12.2	K05C4.7	R17.1	F58B3.9	Y39H10A.7	T26G10.1
B0304.7	C34D4.4	NA	NA	NA	NA	NA	Y38C1AA.5	K06B9.2	C18E3.7	C48B4.7	F15B10.2	F53H2.3	F53F8.6	R10E4.4	NA	NA	F28C6.10	F32A7.3	F39B2.8	C44H4.6	C40D2.3	C14B1.3	C13C4.8	C54D1.3	D2030.12	F18E2.3	R07B7.5	NA	F53B3.5	Y22D7AL.5	NA	T14G11.1	C50D2.9	C35C5.9	F21C10.3	C27D11.1	NA	NA	NA	Y39G8C.3	Y105E8A.26	NA	F38G1.1	C44C1.3	K06A5.6	R74.5	F58D2.1	Y40B1B.7	T28H10.1
B0304.9	C34E10.5	NA	NA	NA	NA	NA	Y38C1AB.8	K06H7.4	C18E3.8	C48E7.2	F15B10.3	F53H4.6	F53G2.2	R119.4	NA	NA	F28C6.2	F32B5.7	F39H12.3	C44H9.6	C40H1.4	C14C10.7	C13D9.1	C54D10.3	D2085.1	F19B10.4	R07G3.1	NA	F53C3.5	Y22D7AL.8	NA	T19C4.1	C50F2.10	C36A4.11	F21C10.5	C27D8.4	NA	NA	NA	Y40A1A.1	Y105E8A.5	NA	F39E9.6	C44C11.1	K07F5.12	T01E8.2	F58D2.4	Y41C4A.10	VF36H2L.1
B0310.1	C34E10.8	NA	NA	NA	NA	NA	Y39A1A.9	K07B1.3	C18E3.9	C49C8.3	F15H10.3	F53H8.3	F53H8.3	R12B2.4	NA	NA	F28D9.1	F32D8.12	F40A3.2	C45B2.7	C40H1.8	C14C11.4	C13F10.1	C54D10.7	D2089.3	F19H8.1	R08F11.1	NA	F53F1.2	Y25C1A.5	NA	T20G5.2	C50F7.2	C36A4.3	F21D5.3	C27D9.1	NA	NA	NA	Y42H9AR.1	Y105E8A.6	NA	F39H12.1	C45B11.3	K08D10.13	T01G9.2	F58D5.1	Y43F4B.10	W02A11.1
B0310.2	C34G6.5	NA	NA	NA	NA	NA	Y39A1B.2	K07G5.3	C18E9.10	C49D10.11	F16D3.2	F54A5.1	F54D10.1	R12E2.13	NA	NA	F28H1.1	F32D8.9	F40E10.2	C46A5.2	C40H5.2	C14C6.10	C13G3.1	C54D10.9	D2096.1	F20C5.7	R10E4.2	NA	F53F8.1	Y37E3.17	NA	T21D12.7	C50H11.1	C36B7.7	F21D5.5	C27F2.10	NA	NA	NA	Y43F4A.1	Y105E8B.9	NA	F40F12.1	C46A5.4	K08E7.1	T02G6.11	F58E1.12	Y45F10A.6	W02D3.1
B0310.3	C34G6.7	NA	NA	NA	NA	NA	Y39H10A.4	K08B12.1	C18E9.11	C49D10.3	F17A2.5	F54C4.4	F54D5.14	R12H7.5	NA	NA	F28H6.8	F32E10.8	F40F9.9	C46F4.2	C40H5.7	C14E2.5	C14A11.7	C54D2.4	DC2.7	F20G4.1	R11E3.8	NA	F53H1.3	Y38C1BA.1	NA	T22D1.12	C50H11.13	C37C3.13	F21F3.1	C27F2.5	NA	NA	NA	Y43F8B.9	Y106G6E.6	NA	F40F9.10	C46A5.8	K08E7.2	T02G6.6	F58E1.14	Y45G12C.3	W02D7.7
B0310.5	C34H4.5	NA	NA	NA	NA	NA	Y39H10A.5	K08C7.5	C18E9.4	C50A2.2	F17A9.6	F54D10.1	F54F7.6	R13F6.1	NA	NA	F28H7.4	F32F2.1	F40H6.5	C46H11.11	C41A3.2	C14E2.7	C14A6.1	C54D2.5	E02C12.3	F21A10.2	R11G1.7	NA	F54A5.2	Y38H6C.17	NA	T22E5.6	C50H2.4	C37C3.4	F22B5.9	C27F2.8	NA	NA	NA	Y44E3A.1	Y116F11B.13	NA	F40H3.3	C46C11.3	K10B2.3	T03F1.2	F58E1.2	Y46D2A.1	W02G9.3
B0310.6	C35D10.13	NA	NA	NA	NA	NA	Y39H10A.6	K08C9.5	C18E9.6	C50B6.2	F17C11.9	F54H12.5	F54H12.6	R144.6	NA	NA	F29A7.1	F32H5.3	F41B5.10	C46H11.8	C41C4.12	C14F11.3	C14B9.1	C54F6.16	E02H1.3	F21A10.4	R11H6.2	NA	F54A5.3	Y39A1C.2	NA	T22E5.7	C51E3.7	C37C3.8	F22B7.7	C27F2.9	NA	NA	NA	Y45F10B.59	Y16B4A.1	NA	F41D9.1	C46E1.3	K10E9.1	T04A11.3	F58E1.3	Y46G5A.39	W03B1.4
B0331.1	C35D10.5	NA	NA	NA	NA	NA	Y41D4B.17	K08E4.3	C18F10.7	C50C3.8	F18A1.5	F55A4.8	F55C9.13	R52.8	NA	NA	F29C4.6	F33H1.1	F41C3.5	C47B2.6	C41C4.2	C14F11.4	C14C10.7	C54G4.4	E03E2.1	F21C10.10	R12H7.3	NA	F54B11.5	Y39E4B.6	NA	T23F11.1	C52A10.2	C37E2.1	F22D6.11	C27H6.8	NA	NA	NA	Y45F3A.4	Y18D10A.13	NA	F41D9.3	C46F11.1	K10G4.10	T05A12.3	F58E1.9	Y46G5A.8	W03G1.6
B0331.2	C35D10.6	NA	NA	NA	NA	NA	Y41D4B.6	K08E4.6	C18G1.4	C50D2.8	F18A1.8	F55C9.10	F55C9.14	R52.9	NA	NA	F29G9.1	F33H2.8	F41C3.8	C47C12.2	C41C4.5	C15A11.3	C14C11.4	C54G6.2	E03H4.8	F21D9.1	R13.4	NA	F54D5.12	Y43E12A.2	NA	T26C12.1	C52A11.2	C38C10.1	F22D6.5	C27H6.9	NA	NA	NA	Y47D9A.2	Y20F4.4	NA	F41D9.5	C46H11.1	LLC1.1	T05G5.10	F58H7.7	Y47D3A.27	W04D2.5
B0334.1	C35E7.8	NA	NA	NA	NA	NA	Y43F8B.9	K09E9.2	C18G1.5	C50E3.12	F18A12.6	F55C9.13	F55C9.4	R74.5	NA	NA	F29G9.7	F35B3.7	F41E6.8	C47E8.9	C41G11.1	C15A11.4	C14C6.2	C54G7.3	E04A4.1	F21G4.6	R13H4.4	NA	F54E7.3	Y45F10A.7	NA	T28D6.4	C52B11.3	C38H2.3	F22E10.1	C28A5.1	NA	NA	NA	Y47G6A.17	Y23H5A.5	NA	F41G3.21	C46H11.7	M01E5.3	T07F10.3	F59B2.3	Y47G6A.28	W05H9.3
B0334.10	C36A4.4	NA	NA	NA	NA	NA	Y44E3A.2	K10C3.2	C18H7.4	C50F2.1	F18A12.7	F55C9.4	F55C9.7	T01B7.4	NA	NA	F31A3.4	F35C8.6	F41G3.3	C48B4.1	C41G11.3	C15A7.2	C14C6.5	C55A1.1	E04A4.2	F22B5.1	R57.1	NA	F55A12.4	Y45F3A.3	NA	T28F2.5	C52D10.3	C39B10.2	F23B12.7	C28C12.12	NA	NA	NA	Y48E1B.14	Y24D9A.6	NA	F42A9.12	C46H11.8	M01E5.4	T08A11.2	F59C12.4	Y48A6B.3	W06H12.1
B0334.11	C36A4.5	NA	NA	NA	NA	NA	Y46G5A.1	M01E5.4	C18H9.3	C50F4.14	F18E2.5	F55C9.6	F55C9.8	T02C1.1	NA	NA	F31A9.4	F35C8.9	F42A10.3	C48D5.1	C41G11.4	C15B12.2	C14E2.5	C55A1.9	E04F6.3	F22F1.1	T02C5.3	NA	F55B12.5	Y46G5A.1	NA	VF13D12L.1	C52E12.2	C39B10.5	F23G4.1	C28D4.3	NA	NA	NA	Y51H7C.12	Y34B4A.8	NA	F42C5.9	C47E12.6	M03C11.4	T08D10.1	F59E12.10	Y48A6C.6	W06H3.2
B0334.13	C36A4.9	NA	NA	NA	NA	NA	Y46G5A.29	M01G5.1	C23G10.2	C52B11.3	F19B10.9	F55G1.6	F55F8.5	T03F6.3	NA	NA	F31E3.3	F35D11.11	F42G4.3	C48E7.7	C41H7.7	C15B12.5	C14E2.7	C55A6.4	EEED8.15	F22F4.2	T03D3.1	NA	F56A11.5	Y46H3A.6	NA	W01A11.3	C52E2.4	C39B5.9	F25B3.3	C28H8.12	NA	NA	NA	Y52B11A.4	Y37A1B.17	NA	F42G8.3	C47E8.6	M03C11.6	T09A5.10	H02I12.2	Y49F6C.2	W07E6.2
B0334.15	C36B1.11	NA	NA	NA	NA	NA	Y47D3B.5	M03B6.3	C23G10.4	C52E2.6	F19B6.1	F55G7.2	F55G7.2	T04B8.3	NA	NA	F31E9.2	F35D2.5	F42H10.5	C49A1.5	C42C1.2	C15C6.1	C14F11.3	C55C3.4	F01F1.1	F23D12.5	T03F1.6	NA	F56A8.9	Y47D3B.10	NA	W01C8.5	C53A5.10	C40C9.4	F25C8.4	C28H8.4	NA	NA	NA	Y53C10A.4	Y37A1C.1	NA	F42H10.3	C48C5.3	M106.7	T09F5.12	H05C05.1	Y4C6B.1	W09C3.4
B0334.2	C36B1.3	NA	NA	NA	NA	NA	Y47G6A.17	M05D6.2	C23G10.7	C52E4.4	F19B6.2	F56A6.2	F56B3.5	T04D3.5	NA	NA	F31E9.4	F35H10.4	F43D9.1	C49A9.5	C42D4.13	C15C7.5	C14F11.4	C55H1.2	F01F1.6	F23F12.9	T04B8.5	NA	F56D1.4	Y47D3B.4	NA	W01F3.3	C53A5.17	C40H1.4	F25D1.1	C29A12.1	NA	NA	NA	Y53F4B.5	Y37E11AL.5	NA	F43C9.2	C48D5.2	M151.6	T10B10.3	H24O09.2	Y50D4A.5	W09C5.1
B0334.3	C36B1.4	NA	NA	NA	NA	NA	Y48G1C.10	M142.4	C24A11.8	C53A3.1	F19F10.1	F56A8.8	F56C4.1	T04F8.1	NA	NA	F33C8.1	F35H8.5	F44C8.7	C49A9.6	C43C3.1	C15C8.1	C14F5.2	CC8.3	F01G10.7	F25B4.6	T04G9.4	NA	F57A10.3	Y47D3B.9	NA	W03G9.1	C53B7.5	C40H1.5	F25E2.1	C29E4.13	NA	NA	NA	Y54F10AM.4	Y37E11AL.6	NA	F44C8.10	C48E7.5	M57.2	T10B5.3	H35N09.2	Y51H4A.12	W09C5.12
B0334.4	C36B1.7	NA	NA	NA	NA	NA	Y51A2D.19	M153.5	C24B5.2	C53A5.1	F19F10.10	F56F3.1	F56F3.6	T05A7.4	NA	NA	F33H2.7	F36F2.2	F44C8.8	C49A9.8	C43F9.10	C15C8.3	C15A11.3	D1005.3	F01G10.8	F25G6.1	T05E11.3	NA	F57A10.5	Y47G6A.21	NA	W04C9.3	C54A12.2	C40H5.2	F25E5.4	C29E4.4	NA	NA	NA	Y55B1AL.1	Y38F1A.10	NA	F44C8.11	C49C3.21	R02D3.2	T11A5.5	H38K22.1	Y53F4B.9	W09C5.2
B0334.5	C36B1.8	NA	NA	NA	NA	NA	Y53C10A.4	M28.8	C24B9.3	C53D5.6	F19F10.5	F56G4.2	F56G4.2	T05B11.1	NA	NA	F34D6.1	F36H2.3	F44D12.16	C49A9.9	C43H6.9	C15C8.6	C15A11.4	D1007.18	F02E8.5	F26D10.12	T05E11.5	NA	F57A8.1	Y47H9C.5	NA	W04G3.2	C54D1.3	C41C4.7	F25E5.5	C29H12.2	NA	NA	NA	Y56A3A.7	Y38H6C.14	NA	F44C8.6	C49F8.3	R02D3.4	T12D8.10	H40L08.1	Y53G8AM.8	W09H1.4
B0334.6	C36C9.3	NA	NA	NA	NA	NA	Y53F4B.20	PAR2.3	C24D10.4	C54G10.2	F19F10.6	F56G4.3	F56G4.3	T05G5.3	NA	NA	F35C11.6	F37B1.2	F44D12.4	C49C3.4	C44B7.6	C15C8.8	C15A11.7	D1025.7	F02H6.1	F26D11.11	T05H4.10	NA	F57B9.1	Y48C3A.14	NA	W04G3.8	C54E10.3	C41C4.9	F25F8.2	C30A5.3	NA	NA	NA	Y57E12B.3	Y39A1B.2	NA	F45E1.7	C50B8.4	R02D3.5	T16G12.8	K01G5.8	Y53H1A.4	W10C6.1
B0334.8	C36F7.2	NA	NA	NA	NA	NA	Y53H1B.1	PDB1.1	C24D10.5	C54G4.6	F19H6.4	F57F4.2	F57G9.3	T05H4.5	NA	NA	F35E12.2	F38A1.1	F44D12.6	C49C8.2	C44E12.3	C15F1.1	C15B12.2	D1065.4	F07A11.5	F26D12.1	T07A9.14	NA	F57G12.1	Y48E1C.1	NA	W05B2.2	C54E10.7	C41D7.2	F25H2.11	C30B5.1	NA	NA	NA	Y57G11A.1	Y39H10A.4	NA	F45E4.7	C50B8.5	R02F11.4	T17A3.3	K02B12.2	Y66D12A.12	Y102E9.1
B0336.1	C37H5.3	NA	NA	NA	NA	NA	Y54G2A.25	R01H2.3	C24D10.6	C54G4.9	F19H8.2	F57G9.3	F58A4.3	T07C4.1	NA	NA	F35E2.8	F38A6.2	F44E7.7	C49C8.4	C45G7.5	C15H11.11	C15C6.1	D1079.1	F07B7.10	F27D4.2	T09B4.5	NA	F58H10.1	Y48G8AL.11	NA	W05B5.3	C54E4.3	C41G11.4	F25H5.4	C30B5.2	NA	NA	NA	Y57G11C.32	Y39H10A.5	NA	F45G2.1	C50C3.9	R04D3.2	T19B10.4	K02B12.4	Y67H2A.1	Y105C5B.20
B0336.10	C37H5.8	NA	NA	NA	NA	NA	Y54G2A.26	R02D3.5	C24F3.1	C54G6.1	F20A1.9	F58B3.9	F58A4.4	T07C4.12	NA	NA	F35G2.3	F38E11.3	F44F4.11	C49C8.5	C45G9.11	C15H9.11	C15C7.5	D2007.1	F07B7.3	F27D9.6	T09B4.8	NA	F59B10.1	Y48G9A.3	NA	W06D12.3	C54G4.1	C41G6.13	F25H9.3	C30B5.4	NA	NA	NA	Y63D3A.5	Y41D4B.17	NA	F45H10.4	C50D2.1	R04D3.4	T19C3.5	K02B2.1	Y71F9AL.14	Y105E8B.7
B0336.11	C38C3.5	NA	NA	NA	NA	NA	Y55D5A.3	R02F11.4	C24F3.2	C55B6.1	F20B6.7	F58D2.1	F58D2.4	T07C4.2	NA	NA	F35H8.7	F38G1.1	F45E1.2	C49F8.2	C45G9.14	C15H9.2	C15C8.1	D2007.3	F07E5.1	F27E5.2	T10C6.6	NA	F59B2.8	Y50D7A.6	NA	W06D4.1	C54G4.7	C41G7.8	F27B10.1	C30C11.2	NA	NA	NA	Y65B4BR.2	Y41G9A.1	NA	F46A9.3	C50D2.2	R05D11.7	T21C12.8	K02D3.1	Y71F9AL.6	Y106G6A.2
B0336.12	C38D4.1	NA	NA	NA	NA	NA	Y55F3AL.1	R04B3.1	C24F3.4	C55B7.1	F20B6.9	F58D2.4	F58D5.7	T07C4.6	NA	NA	F36H5.11	F38G1.2	F45E10.1	C49G7.8	C46A5.2	C15H9.9	C15C8.3	D2023.1	F07E5.2	F28C1.2	T12D8.8	NA	F59B8.2	Y51H7C.10	NA	W08F4.6	C55H1.2	C41G7.9	F27C1.11	C30F12.4	NA	NA	NA	Y67A10A.9	Y41G9A.2	NA	F46F11.7	C50D2.6	R05D11.9	T22B2.2	K02E7.9	Y73B3A.4	Y106G6E.4
B0336.13	C38D4.4	NA	NA	NA	NA	NA	Y55F3BR.2	R05D11.8	C24G6.1	C55C3.3	F20G2.5	F58D5.9	F58E1.10	T07C4.8	NA	NA	F36H5.5	F39C12.2	F45E4.7	C49H3.1	C46A5.4	C16A11.1	C15C8.5	D2030.10	F07E5.6	F28D1.10	T12E12.3	NA	F59D6.1	Y51H7C.11	NA	W09D6.5	C56A3.6	C43C3.2	F27C1.6	C30H6.8	NA	NA	NA	Y67D2.1	Y44E3A.2	NA	F46F3.3	C50F2.7	R06A4.4	T22D1.10	K03A1.6	Y73B6BL.36	Y116A8C.43
B0336.2	C38D4.6	NA	NA	NA	NA	NA	Y56A3A.6	R05D3.12	C25A1.12	C56A3.5	F20H11.2	F58E1.11	F58E1.11	T07F10.3	NA	NA	F36H5.8	F39H12.3	F46C3.3	C50B8.5	C46E1.2	C16B8.3	C15C8.6	D2089.4	F07F6.8	F28D1.2	T12G3.1	NA	F59E12.13	Y53G8AM.2	NA	Y102A11A.2	C56G2.1	C43E11.7	F28B12.1	C30H6.9	NA	NA	NA	Y6B3A.1	Y44E3A.4	NA	F46G10.7	C50F4.13	R06A4.7	T22G5.3	K04C1.2	Y75B7AL.4	Y34B4A.3
B0336.3	C39E9.13	NA	NA	NA	NA	NA	Y57G11C.24	R05F9.11	C25A1.13	C56A3.8	F21D9.1	F58E1.12	F58E1.12	T08E11.6	NA	NA	F37B1.5	F40E10.2	F46C3.6	C50B8.6	C46E1.3	C16C10.9	C15C8.8	DC2.3	F08A8.2	F29B9.2	T13A10.11	NA	F59F3.5	Y54E10A.9	NA	Y105C5B.19	C56G2.15	C43F9.4	F28C1.3	C30H7.2	NA	NA	NA	Y71F9AR.2	Y46G5A.1	NA	F46G11.6	C50F4.9	R06C1.1	T22H9.2	K04C1.3	Y75B8A.18	Y37E11B.1
B0336.4	C40H1.1	NA	NA	NA	NA	NA	Y57G7A.12	R05H5.2	C25A1.5	C56G2.7	F21D9.2	F58E1.14	F58E1.2	T09F3.5	NA	NA	F37C4.6	F40E10.4	F46F11.11	C50C3.9	C46F11.1	C16C8.2	C15F1.1	DH11.4	F08B12.2	F29D10.4	T13F2.3	NA	F59F4.3	Y54E10BR.1	NA	Y105E8A.6	C56G2.9	C43F9.7	F28D1.4	C31H1.8	NA	NA	NA	Y71G12A.3	Y47D3B.5	NA	F46H6.2	C51E3.10	R06F6.5	T23D8.5	K04G2.10	Y77E11A.10	Y37E3.1
B0336.5	C41C4.6	NA	NA	NA	NA	NA	Y63D3A.5	R06F6.5	C25A1.8	C56G7.1	F22B8.7	F58E1.2	F58E1.3	T10B5.3	NA	NA	F37D6.4	F40F12.3	F46F11.7	C50D2.1	C46F9.1	C16D2.2	C15H11.11	DH11.5	F08C6.2	F31D5.6	T13G4.4	NA	F59H6.10	Y54E2A.4	NA	Y106G6H.1	C56G3.1	C44B11.6	F29F11.3	C32A3.1	NA	NA	NA	Y71G12B.23	Y48G8AR.1	NA	F46H6.5	C51F7.1	R07C3.9	T23F2.5	K04G7.10	Y81G3A.5	Y38A10A.5
B0336.6	C41C4.7	NA	NA	NA	NA	NA	Y64G10A.7	R07B1.12	C25A1.9	CD4.6	F22E5.1	F58E1.8	F58E1.8	T10B5.6	NA	NA	F38A5.7	F40H3.4	F46F6.4	C50D2.6	C46G7.4	C16D6.2	C15H9.11	DY3.5	F08C6.6	F31E3.1	T14F9.5	NA	H06O01.1	Y54E5B.1	NA	Y116F11B.2	CC8.2	C44B7.6	F30B5.7	C32A3.3	NA	NA	NA	Y71H2B.10	Y48G9A.8	NA	F47B10.7	C52A11.4	R07E5.8	T23G5.1	K05F6.1	Y82E9BR.1	Y38C1AA.11
B0336.7	C41D11.3	NA	NA	NA	NA	NA	Y65B4BL.1	R07E5.17	C25A11.2	CD4.8	F22E5.11	F58E1.9	F58E1.9	T10C6.11	NA	NA	F38C2.5	F41C3.11	F46G10.1	C50F2.4	C46H11.11	C16D9.5	C15H9.2	E01F3.1	F08D12.11	F31E8.3	T14G10.5	NA	H10E21.3	Y55D5A.1	NA	Y15E3A.1	CD4.2	C44E12.3	F30F8.9	C32D5.11	NA	NA	NA	Y75B8A.12	Y51A2D.19	NA	F47B8.10	C52B9.2	R07G3.5	T24B8.6	K05F6.3	Y87G2A.3	Y38F1A.5
B0336.8	C41G7.1	NA	NA	NA	NA	NA	Y67D8A.1	R07E5.4	C25D7.8	D1005.5	F22E5.12	F59A1.10	F58E10.2	T10C6.12	NA	NA	F38C2.7	F41C3.5	F46G10.5	C50F4.13	C46H11.7	C16D9.6	C15H9.9	E01G4.3	F08D12.3	F31E8.4	T15B7.15	NA	H12D21.10	Y55D5A.3	NA	Y17G7B.10	D1054.13	C44F1.3	F31E9.3	C32E8.8	NA	NA	NA	Y79H2A.6	Y53F4B.20	NA	F47G9.3	C52B9.3	R09A1.1	T24H10.1	K05F6.9	Y92H12BR.4	Y39A1A.14
B0336.9	C41G7.2	NA	NA	NA	NA	NA	Y67D8A.2	R07G3.5	C25H3.14	D1007.16	F22E5.16	F59B2.3	F58E10.3	T10C6.13	NA	NA	F38E9.1	F41C3.7	F46G10.7	C50H2.1	C47A10.8	C16D9.9	C16A3.10	E01G6.1	F08D12.6	F32A6.4	T16A1.2	NA	H12D21.7	Y55F3AL.1	NA	Y17G7B.11	D1069.4	C44H4.6	F31F4.7	C32F10.1	NA	NA	NA	Y82E9BR.20	Y53H1B.1	NA	F47G9.4	C52B9.6	R10E4.11	T24H7.2	K07C5.3	ZC155.7	Y39A1A.15
B0344.2	C41G7.3	NA	NA	NA	NA	NA	Y67D8C.9	R07H5.4	C25H3.3	D1007.8	F22E5.17	H24O09.2	F59A2.4	T12D8.7	NA	NA	F38H4.2	F41C3.8	F46G11.2	C51E3.6	C47D2.1	C16H3.2	C16B8.3	E01H11.1	F08D12.8	F32B6.9	T16G12.5	NA	H14A12.3	Y56A3A.7	NA	Y17G9B.4	D1086.2	C44H9.4	F32A5.3	C33B4.4	NA	NA	NA	Y92H12BL.4	Y53H1C.2	NA	F48D6.3	C52G5.3	R10H10.6	T25E12.6	K07F5.13	ZC376.1	Y39A1A.3
B0348.2	C42C1.11	NA	NA	NA	NA	NA	Y69A2AR.13	R08D7.7	C25H3.4	D1009.2	F22G12.3	H37A05.4	F59A6.5	T12E12.3	NA	NA	F39F10.3	F41D9.5	F46H5.5	C51E3.9	C47E12.6	C17C3.4	C16C8.2	E02C12.6	F08D12.9	F32E10.2	T17E9.2	NA	H17B01.4	Y57G11C.31	NA	Y34D9B.1	D1086.9	C44H9.6	F32B6.1	C33E10.2	NA	NA	NA	Y92H12BM.1	Y54B9A.1	NA	F48E3.1	C53D6.11	R144.6	T26C11.6	K08C9.7	ZK1058.5	Y39B6A.34
B0348.4	C42C1.15	NA	NA	NA	NA	NA	Y69A2AR.31	R09B5.9	C25H3.6	D1014.3	F22H10.5	H38K22.2	F59B2.3	T12F5.1	NA	NA	F40F4.1	F41E6.15	F46H5.7	C52B9.1	C48A7.1	C17D12.3	C16D2.1	E02H4.5	F08F1.5	F32H2.2	T19B4.5	NA	K01A2.3	Y57G11C.37	NA	Y37E11AL.6	D2007.2	C45B11.4	F32D8.10	C33F10.14	NA	NA	NA	ZC21.10	Y54G2A.25	NA	F48E8.8	C54A12.1	R144.9	T26C11.9	K08D10.1	ZK185.3	Y39G10AR.5
B0348.5	C42C1.8	NA	NA	NA	NA	NA	Y70C5C.1	R11A8.3	C26B2.7	D1037.1	F23B2.6	H40L08.1	H12D21.13	T13B5.8	NA	NA	F40F9.6	F41F3.2	F47A4.1	C52B9.2	C48D5.1	C17E7.5	C16D2.2	E02H4.8	F08G12.1	F33A8.3	T20D4.19	NA	K01A2.4	Y59A8B.6	NA	Y38C1AA.5	D2007.3	C45E5.4	F33A8.4	C33F10.4	NA	NA	NA	ZC247.3	Y54G2A.26	NA	F48F7.7	C54D1.7	R151.6	T26E3.5	K08F11.1	ZK250.2	Y39G8B.1
B0348.6	C43E11.11	NA	NA	NA	NA	NA	Y71A12B.12	R12E2.3	C26D10.1	D1043.1	F23C8.9	H42K12.1	H24K24.5	T13C2.4	NA	NA	F40G12.4	F41G3.12	F47B8.2	C52E12.2	C49A9.2	C17E7.6	C16D6.2	E02H9.8	F08G12.2	F33A8.9	T20F10.1	NA	K01A2.8	Y5H2B.2	NA	Y38F2AL.1	D2024.10	C45G7.3	F33D4.3	C33H5.15	NA	NA	NA	ZC328.1	Y55B1AR.2	NA	F49D11.4	C54D2.1	R155.1	T27A1.1	K08F11.2	ZK250.7	Y39G8B.2
B0350.2	C43E11.12	NA	NA	NA	NA	NA	Y71D11A.1	R13H4.2	C26E6.5	D1046.2	F23D12.4	K01G5.9	H27D07.6	T13C5.8	NA	NA	F40G9.10	F41G3.18	F47B8.9	C52G5.2	C49A9.5	C17E7.7	C16D9.1	E03A3.6	F08G2.7	F33H2.1	T21B6.1	NA	K01B6.3	Y60A3A.24	NA	Y38H6C.16	D2030.12	C45H4.10	F33D4.4	C33H5.19	NA	NA	NA	ZC64.4	Y55F3AM.11	NA	F49D11.6	C54D2.5	T01C3.8	T27F2.1	K09A11.1	ZK512.4	Y40B1A.2
B0350.3	C43E11.4	NA	NA	NA	NA	NA	Y71F9AL.17	R53.1	C26E6.7	D1054.14	F23F1.10	K02A4.1	JC8.4	T14F9.2	NA	NA	F40G9.12	F41G3.2	F47C10.7	C53A5.13	C49A9.7	C17F4.11	C16D9.3	E03D2.2	F08G5.5	F33H2.7	T22B2.4	NA	K02B12.1	Y60A3A.5	NA	Y40B10A.9	D2030.9	C45H4.13	F34H10.2	C33H5.6	NA	NA	NA	ZK1193.5	Y55F3BR.2	NA	F49E11.2	C54E10.6	T01D3.4	T27F6.2	K09C4.8	ZK593.8	Y40B1B.3
B0353.1	C43G2.1	NA	NA	NA	NA	NA	Y71G12A.3	R57.2	C26F1.7	D1054.15	F23F12.13	K02B12.2	K02B12.2	T14F9.3	NA	NA	F40G9.14	F41G3.3	F47E1.3	C53B4.7	C49C3.4	C17F4.2	C16D9.5	E03D2.3	F09C3.4	F35C8.4	T22C8.3	NA	K02B2.4	Y63D3A.6	NA	Y41D4B.6	D2085.7	C45H4.17	F34H10.4	C33H5.7	NA	NA	NA	ZK1240.5	Y55F3C.4	NA	F49E2.1	C54F6.3	T01D3.5	T28D9.10	K09F6.8	ZK616.4	Y41D4B.12
B0361.10	C44B7.10	NA	NA	NA	NA	NA	Y71G12B.11	T01E8.4	C26H9A.1	D1054.2	F23F12.4	K02D3.1	K02B7.3	T19B4.5	NA	NA	F40G9.18	F42A9.5	F47E1.5	C53B4.8	C49C8.5	C17F4.7	C16D9.6	E03H12.6	F09C3.5	F35E2.2	T22G5.5	NA	K02B9.4	Y64G10A.7	NA	Y41D4B.7	D2096.7	C46F4.1	F35B12.9	C33H5.8	NA	NA	NA	ZK287.1	Y57A10A.24	NA	F52A8.2	C54G4.4	T01G1.4	VB0393L.2	K10C9.6	ZK637.7	Y41E3.8
B0361.11	C44B7.12	NA	NA	NA	NA	NA	Y71H2AM.19	T03D8.6	C27A12.2	D1054.3	F23H11.1	K02E2.2	K02E2.4	T19H12.10	NA	NA	F40G9.9	F42C5.9	F47F6.1	C53B7.1	C49F5.1	C17G1.1	C16H3.1	E04F6.6	F09C8.2	F35E2.8	T23G4.1	NA	K02E10.8	Y66D12A.24	NA	Y41G9A.1	D2096.8	C46F9.4	F35D11.3	C34B2.2	NA	NA	NA	ZK377.2	Y57G11C.18	NA	F52A8.3	C54G4.5	T01G9.4	W01B11.3	K10H10.3	ZK816.3	Y43F8B.2
B0361.2	C45B11.1	NA	NA	NA	NA	NA	Y73B3A.9	T03G11.8	C27A12.3	D1081.6	F23H11.5	K02E2.4	K02E7.9	T20D4.19	NA	NA	F40H6.4	F42G10.2	F47G4.5	C53C11.3	C49F8.2	C17G10.5	C16H3.2	E04F6.9	F09E5.16	F35H10.1	T24B8.3	NA	K02E7.7	Y67D8A.1	NA	Y51H4A.25	DH11.5	C46H11.2	F35E12.8	C34B2.5	NA	NA	NA	ZK418.3	Y57G11C.20	NA	F52E1.5	C54G6.2	T01G9.6	W02B12.2	K12H6.7	ZK822.2	Y43F8B.6
B0361.3	C45G9.2	NA	NA	NA	NA	NA	Y73E7A.8	T03G6.1	C27A12.7	D1081.8	F25B3.6	K02E7.9	K03B8.11	T20G5.11	NA	NA	F42A10.9	F42G4.3	F47G6.4	C53C7.1	C49H3.1	C17G10.7	C17B7.14	EEED8.6	F09F7.6	F35H10.11	T24C2.3	NA	K02F3.4	Y71A12B.12	NA	Y51H7C.12	E01F3.1	C46H11.3	F35E12.9	C34B2.6	NA	NA	NA	ZK520.3	Y57G11C.24	NA	F52E4.6	C54G6.3	T01H3.3	W02B12.3	M01D1.1	ZK909.5	Y45F10D.11
B0361.4	C45H4.10	NA	NA	NA	NA	NA	Y73F8A.5	T04A11.7	C27A12.8	D1086.19	F25E5.5	K02F6.9	K04G2.10	T22B7.3	NA	NA	F42A6.7	F42H10.5	F48D6.3	C53D5.2	C50B6.7	C17H1.2	C17C3.4	F01D4.4	F09G2.9	F35H12.5	T26C12.3	NA	K02F3.6	Y71D11A.1	NA	Y53C10A.4	E02A10.1	C47E8.3	F35E8.1	C34B2.8	NA	NA	NA	ZK6.6	Y59E9AR.10	NA	F53B1.6	C54G7.3	T03D3.5	W02D3.11	M01D1.3	NA	Y46B2A.1
B0361.5	C46A5.5	NA	NA	NA	NA	NA	Y76A2B.1	T04A8.15	C27A2.3	D2005.3	F25G6.3	K04G2.10	K05F6.2	T23B12.3	NA	NA	F42A9.2	F43C1.1	F49A5.5	C53D5.3	C50C3.9	C17H11.1	C17F4.11	F01D5.3	F10C2.5	F36A4.8	T27A1.5	NA	K04C2.3	Y71D11A.3	NA	Y53H1B.1	E02A10.4	C47G2.1	F35E8.12	C34B7.2	NA	NA	NA	ZK652.2	Y59E9AR.9	NA	F53C3.5	C54H2.4	T03F6.3	W02H5.10	M01D1.7	NA	Y47D3A.1
B0361.6	C46C2.7	NA	NA	NA	NA	NA	Y76A2B.2	T04A8.5	C27A7.6	D2005.4	F25H2.8	K05F6.5	K05F6.3	T23C6.4	NA	NA	F42E11.1	F43D9.1	F49A5.7	C54D1.3	C50D2.1	C17H11.5	C17F4.2	F01F1.12	F10D2.10	F36G3.2	T27B1.2	NA	K04D7.4	Y71F9AM.4	NA	Y54E10A.16	E02C12.2	C48B4.2	F35E8.2	C34B7.4	NA	NA	NA	ZK688.11	Y64G10A.7	NA	F53F10.1	C55A1.12	T05C3.5	W02H5.4	M01D1.9	NA	Y47D3A.25
B0361.7	C46F11.3	NA	NA	NA	NA	NA	Y79H2A.11	T04F8.4	C27B7.1	D2005.5	F26A1.10	K05F6.6	K05F6.6	T23G5.1	NA	NA	F42G9.1	F43E2.3	F49A5.8	C54D10.14	C50D2.2	C17H12.10	C17F4.7	F01F1.3	F10D2.12	F36H5.11	T27D12.1	NA	K04F10.1	Y71H2AM.19	NA	Y54E5B.1	E02H1.1	C49C3.10	F35E8.4	C34C12.2	NA	NA	NA	ZK688.5	Y65B4BL.1	NA	F53G12.13	C55A1.6	T05E12.10	W03D2.1	M01D7.1	NA	Y47G6A.6
B0361.8	C47B2.4	NA	NA	NA	NA	NA	Y92H12BL.4	T05A7.11	C27B7.2	D2005.7	F26A1.12	K05F6.9	K05F6.7	T24A6.20	NA	NA	F43E2.11	F43E2.9	F49C12.2	C54F6.3	C50D2.4	C17H12.11	C17G1.1	F01G10.4	F10D2.6	F36H5.4	T28C6.10	NA	K06A1.3	Y73E7A.3	NA	Y54G2A.1	E03A3.2	C49C3.8	F35F10.13	C34C12.3	NA	NA	NA	ZK688.8	Y65B4BR.3	NA	F53G12.4	C55A6.12	T05E12.8	W03D2.2	M02D8.3	NA	Y48B6A.1
B0361.9	C47D12.6	NA	NA	NA	NA	NA	Y95B8A.10	T05A7.4	C27B7.5	D2007.4	F26A1.2	K06G5.2	K05F6.9	T24B8.2	NA	NA	F43G6.5	F44D12.1	F49E10.1	C54F6.4	C50E3.6	C17H12.14	C17G10.5	F02C12.2	F10D2.8	F37H8.2	W02A11.3	NA	K06A4.5	Y73F8A.21	NA	Y55B1AL.1	E04A4.3	C49C8.2	F35F10.4	C34C12.4	NA	NA	NA	ZK822.1	Y66D12A.14	NA	F53H4.3	C55C3.1	T05E7.5	W03F9.10	M03B6.4	NA	Y48B6A.14
B0365.1	C47D12.8	NA	NA	NA	NA	NA	ZC101.3	T05C12.10	C27B7.8	D2013.2	F26D2.16	K07B1.4	K07B1.4	T24C2.3	NA	NA	F44A2.7	F44E2.4	F49E10.2	C54G6.2	C50F7.1	C17H12.4	C17G10.7	F02E8.6	F10D7.3	F37H8.5	W02B12.11	NA	K07C11.1	Y73F8A.26	NA	Y57E12B.3	E04D5.4	C49F8.1	F35F10.5	C34C12.8	NA	NA	NA	ZK836.3	Y69E1A.6	NA	F53H4.4	C55F2.2	T05F1.2	W04A8.9	M03C11.8	NA	Y48E1B.5
B0365.3	C47E12.2	NA	NA	NA	NA	NA	ZC116.3	T06A1.1	C27C12.3	D2013.9	F26D2.2	K07E3.2	K08C7.3	T24C4.2	NA	NA	F44B9.3	F44F4.11	F49E2.1	C54G7.1	C50F7.6	C17H12.6	C17H1.2	F07A11.1	F10E7.1	F38A5.2	W02B12.9	NA	K07C11.4	Y75B8A.6	NA	Y57G11C.24	E04F6.11	C49G7.5	F35F10.6	C34D4.12	NA	NA	NA	ZK867.1	Y6B3B.1	NA	F54C1.5	C56A3.7	T05G5.3	W04E12.2	M05B5.4	NA	Y49A10A.2
B0365.5	C47E12.3	NA	NA	NA	NA	NA	ZC123.3	T06E4.8	C27C7.1	D2030.1	F26D2.7	K08A8.1	K08F11.1	T24H10.1	NA	NA	F44E5.2	F45E1.7	F49F1.14	C54G7.3	C50H2.3	C18A11.2	C17H11.1	F07A5.7	F10E9.8	F38A6.1	W02G9.3	NA	K08A8.2	Y75B8A.9	NA	Y58A7A.2	EEED8.6	C49G9.1	F36D1.14	C34D4.13	NA	NA	NA	NA	Y71F9AL.11	NA	F54C9.10	C56C10.12	T05H10.5	W06A11.2	M05D6.7	NA	Y49E10.19
B0365.6	C47E12.5	NA	NA	NA	NA	NA	ZC373.4	T06E4.9	C27D8.4	D2030.6	F26D2.9	K08B12.3	K09E3.5	T24H10.3	NA	NA	F44F1.4	F45E4.7	F49F1.5	C55C2.5	C51E3.7	C18A11.3	C17H12.10	F07B7.13	F10G7.1	F38E9.1	W03F11.6	NA	K08H2.4	Y80D3A.2	NA	Y71A12B.1	F01D4.4	C49G9.2	F36D1.5	C34D4.4	NA	NA	NA	NA	Y71F9AR.1	NA	F54D10.3	C56C10.3	T05H4.14	W06A11.3	M110.4	NA	Y49F6B.2
B0379.1	C48A7.2	NA	NA	NA	NA	NA	ZC449.5	T07C12.8	C27D9.1	D2030.8	F26E4.8	K08D10.10	K09F6.8	T26A5.7	NA	NA	F44F1.7	F45H7.2	F52C9.5	C55C3.1	C52A11.2	C18A3.10	C17H12.11	F07C4.3	F10G8.6	F39E9.7	W03F8.3	NA	K09A11.2	Y8G1A.2	NA	Y71D11A.1	F01E11.5	C50A2.3	F36F2.7	C34E10.8	NA	NA	NA	NA	Y71G12B.11	NA	F54D5.8	C56C10.4	T06A10.4	W06D11.2	M116.1	NA	Y53F4B.15
B0379.2	C48B4.10	NA	NA	NA	NA	NA	ZC504.4	T07D3.6	C27F2.10	D2030.9	F26F4.11	K08D9.3	K09H9.2	T27A3.7	NA	NA	F45C12.10	F46C3.3	F52D10.3	C55C3.8	C52A11.4	C18A3.4	C17H12.14	F07F6.5	F11A5.12	F39F10.4	W03F8.5	NA	K09A9.3	Y9D1A.1	NA	Y71F9AR.2	F01F1.7	C50F2.4	F36G9.3	C34G6.7	NA	NA	NA	NA	Y71H2AM.22	NA	F54E4.3	C56E10.1	T06E4.1	W07E6.4	M116.4	NA	Y53F4B.18
B0379.3	C48B4.11	NA	NA	NA	NA	NA	ZC84.1	T07F12.1	C27F2.5	D2045.6	F27B3.6	K09A11.1	K10C9.1	T27F2.3	NA	NA	F45C12.11	F46C5.6	F52E4.6	C56A3.1	C52B9.9	C18A3.6	C17H12.4	F08A10.1	F11A6.1	F39G3.2	W03G1.6	NA	K09C8.5	Y9D1A.2	NA	Y71F9B.5	F01G4.5	C50F7.1	F36H12.1	C34H4.5	NA	NA	NA	NA	Y71H2AM.25	NA	F54E7.1	C56E10.3	T06E6.13	W08G11.3	M151.8	NA	Y53F4B.42
B0379.4	C48B4.6	NA	NA	NA	NA	NA	ZC84.6	T07H8.6	C27F2.9	D2096.8	F27C1.4	K09E3.5	K10C9.6	T27F6.10	NA	NA	F45C12.13	F46C8.5	F52F10.2	C56A3.7	C52E12.2	C18B12.2	C17H12.6	F08D12.2	F11C1.1	F40E10.6	W05H9.1	NA	K09H11.7	ZC168.1	NA	Y79H2A.6	F01G4.6	C50F7.6	F36H2.3	C35D10.1	NA	NA	NA	NA	Y73E7A.8	NA	F54F11.1	C56G7.3	T06E6.2	W09G12.1	M57.1	NA	Y54E10A.10
B0379.6	C48B4.7	NA	NA	NA	NA	NA	ZK112.2	T09F5.1	C27H6.3	DC2.3	F27C1.7	K09F5.5	K10H10.3	T28C6.3	NA	NA	F45C12.14	F46F11.11	F52H2.4	C56E6.1	C53A5.13	C18B2.1	C17H12.9	F08F1.1	F11C1.5	F40F4.3	W06B11.2	NA	K10B4.3	ZC247.3	NA	Y80D3A.5	F02A9.1	C50H2.2	F37A4.7	C35D10.10	NA	NA	NA	NA	Y75B8A.24	NA	F55A11.2	cTel54X.1	T07D4.3	W09G12.4	M7.5	NA	Y54F10BM.14
B0379.7	C48B4.8	NA	NA	NA	NA	NA	ZK112.3	T10B11.3	C27H6.8	DC2.7	F28C6.1	K09H9.7	K11C4.4	T28D9.10	NA	NA	F45C12.15	F46F5.7	F53A9.8	C56E6.4	C53A5.5	C18B2.3	C18A11.2	F08G5.6	F11C3.1	F40F4.4	W06H12.1	NA	K10D6.4	ZC504.4	NA	Y8G1A.2	F02C12.4	C50H2.3	F37A8.4	C35D10.13	NA	NA	NA	NA	Y76A2B.1	NA	F55A3.5	D1005.3	T07F12.2	W10D5.2	R02C2.6	NA	Y54G9A.9
B0391.11	C48B4.9	NA	NA	NA	NA	NA	ZK112.7	T10C6.10	C27H6.9	DY3.7	F28C6.10	K10C9.6	K12D12.1	T28F2.2	NA	NA	F45C12.5	F46G10.2	F53B3.2	C56E6.6	C53B4.8	C18C4.2	C18A11.3	F08H9.3	F11D11.12	F40G9.15	W09C5.2	NA	K11D12.5	ZK1058.2	NA	Y9C9A.5	F07A5.5	C51E3.5	F37B1.2	C35D10.5	NA	NA	NA	NA	Y77E11A.11	NA	F55A4.10	D1007.13	T07F8.4	Y105C5B.14	R03A10.3	NA	Y55F3AM.8
B0391.5	C48D1.2	NA	NA	NA	NA	NA	ZK1225.2	T10E9.7	C28A5.1	DY3.8	F28C6.2	K10G4.10	K12H6.6	W01A11.5	NA	NA	F45C12.6	F47B10.2	F53B7.5	C56G2.4	C53C11.3	C18C4.9	C18A11.7	F08H9.4	F11E6.1	F40G9.5	W09D10.1	NA	K11G12.5	ZK1067.1	NA	ZC123.4	F07B7.8	C51E3.6	F37B1.3	C35D10.6	NA	NA	NA	NA	Y79H2A.11	NA	F55C10.1	D1007.3	T08A9.4	Y113G7B.2	R03H10.1	NA	Y55F3AR.2
B0391.9	C48D5.1	NA	NA	NA	NA	NA	ZK1307.6	T11G6.4	C28A5.2	E01A2.2	F28D9.1	K11E4.5	M01D1.10	W02A11.1	NA	NA	F45C12.7	F47C10.7	F53C11.9	C56G3.1	C53C7.1	C18D1.3	C18A3.10	F08H9.9	F11H8.1	F40G9.6	W09D6.6	NA	K11G9.4	ZK1067.2	NA	ZC13.1	F07C3.4	C52B9.1	F37C12.13	C35E7.8	NA	NA	NA	NA	ZC116.3	NA	F55D12.1	D1009.5	T08A9.5	Y113G7B.8	R04A9.5	NA	Y55F3BL.1
B0393.1	C49A9.10	NA	NA	NA	NA	NA	ZK328.7	T11G6.8	C28C12.12	E01A2.4	F28F8.4	K11G12.4	M01D1.3	W02B12.10	NA	NA	F45D11.10	F47E1.5	F53F4.6	CD4.11	C53C9.3	C18D1.4	C18A3.4	F09B12.7	F12E12.10	F42A9.2	W09H1.4	NA	K11H3.3	ZK1067.6	NA	ZC190.4	F07C4.8	C52E2.2	F37H8.2	C36A4.4	NA	NA	NA	NA	ZC123.3	NA	F55H2.2	D1022.8	T08A9.6	Y116A8C.17	R04A9.7	NA	Y56A3A.18
B0393.2	C49A9.7	NA	NA	NA	NA	NA	ZK337.1	T14B4.6	C28C12.2	E01A2.8	F29A7.1	K12D12.1	M01D1.7	W02G9.3	NA	NA	F45D11.13	F47F6.1	F53G12.4	CD4.5	C54A12.1	C18D11.1	C18A3.6	F09C3.1	F12E12.8	F42G2.6	W10D9.4	NA	M01B2.10	ZK1240.3	NA	ZC247.3	F07F6.7	C53A3.2	F38A5.1	C36B1.11	NA	NA	NA	NA	ZC262.7	NA	F56D1.6	D1046.4	T08B2.5	Y116A8C.19	R04B3.2	NA	Y57E12AL.2
B0393.3	C49C3.6	NA	NA	NA	NA	NA	ZK377.2	T14D7.1	C28D4.2	E01B7.1	F29B9.11	K12D12.5	M01D1.8	W03G1.6	NA	NA	F45D3.1	F47G3.1	F54C1.5	cTel3X.1	C54D1.3	C18D4.2	C18B10.5	F09C6.11	F12E12.9	F42G8.3	Y104H12D.3	NA	M01D1.2	ZK1307.6	NA	ZC449.5	F07H5.7	C53A5.5	F38A6.5	C36B1.12	NA	NA	NA	NA	ZC449.5	NA	F57B7.4	D1054.12	T08B2.7	Y116A8C.22	R04F11.5	NA	Y57G11C.38
B0393.4	C49C8.3	NA	NA	NA	NA	NA	ZK512.5	T14E8.4	C28D4.3	E01F3.1	F29B9.6	K12H6.7	M01D1.9	W05H9.1	NA	NA	F46G10.3	F47G4.4	F54C8.6	D1005.3	C54D10.7	C18E9.1	C18B12.2	F09C6.13	F13B9.5	F42G9.2	Y111B2A.9	NA	M01E5.2	ZK1320.6	NA	ZC449.7	F08A7.1	C53D6.7	F38H12.5	C36B1.3	NA	NA	NA	NA	ZC504.4	NA	F57C12.2	D1054.9	T08B6.1	Y116A8C.32	R05H11.1	NA	Y59A8B.8
B0393.5	C49F5.6	NA	NA	NA	NA	NA	ZK520.3	T14G10.3	C28D4.9	E01G4.3	F29G9.1	M01D1.1	M02E1.2	W08E3.1	NA	NA	F47B10.9	F47G9.4	F54D12.5	D1009.1	C54D10.8	C18E9.7	C18B2.1	F09E5.12	F13B9.6	F42G9.4	Y113G7B.16	NA	M01F1.4	ZK265.4	NA	ZK1193.5	F08B1.1	C54A12.4	F40D4.8	C36B1.4	NA	NA	NA	NA	ZC518.4	NA	F57H12.2	D1069.1	T08B6.5	Y116A8C.34	R06A4.8	NA	Y62E10A.10
B0393.6	C49H3.9	NA	NA	NA	NA	NA	ZK6.6	T15B7.10	C28H8.4	E01G4.4	F31A3.4	M01D1.7	M03B6.4	W09C3.4	NA	NA	F47B7.2	F48E3.9	F54D12.6	D1009.3	C54D2.6	C18G1.1	C18B2.3	F09F3.9	F13C5.2	F43C11.6	Y17G9B.7	NA	M01H9.3	ZK337.1	NA	ZK177.9	F08B4.3	C54C6.7	F40E3.6	C36B1.7	NA	NA	NA	NA	ZC84.1	NA	F58D5.2	D2021.2	T09A5.11	Y116A8C.35	R06C7.7	NA	Y62E10A.11
B0393.7	C50B6.3	NA	NA	NA	NA	NA	ZK669.7	T15B7.17	C29A12.1	E02H1.4	F31A9.4	M01D1.9	M03C11.4	Y105C5B.9	NA	NA	F47D2.1	F48F7.1	F54D12.9	D1009.4	C54E4.3	C18G1.6	C18C4.2	F09F7.2	F13E9.13	F43C9.4	Y2H9A.1	NA	M03D4.4	ZK381.5	NA	ZK381.5	F08C6.5	C54C8.7	F40F8.4	C36B1.8	NA	NA	NA	NA	ZC84.6	NA	F58E2.5	D2021.4	T10B11.3	Y116A8C.5	R07B1.12	NA	Y65B4A.3
B0393.8	C50B8.1	NA	NA	NA	NA	NA	ZK822.1	T19B10.2	C29E4.1	E02H4.6	F31E9.4	M01D7.1	M04B2.1	Y106G6A.5	NA	NA	F47H4.1	F48F7.3	F54E2.2	D1014.1	C54F6.3	C18H7.1	C18C4.9	F09G8.6	F14B6.1	F43G6.4	Y32H12A.5	NA	M03F4.7	ZK512.5	NA	ZK669.2	F08F1.3	C54D10.1	F41C3.6	C36C9.1	NA	NA	NA	NA	ZK1098.10	NA	F58E6.11	D2024.3	T10F2.4	Y13C8A.2	R07B7.10	NA	Y65B4A.6
B0393.9	C50B8.2	NA	NA	NA	NA	NA	ZK836.1	T19B4.1	C29E4.13	E03A3.2	F32D1.5	M01D7.9	M05B5.4	Y110A7A.13	NA	NA	F47H4.10	F48G7.2	F54F11.1	D1014.5	C54G4.1	C18H7.11	C18D1.3	F09G8.7	F14B6.3	F44C4.5	Y34D9A.10	NA	M04F3.5	ZK770.3	NA	ZK678.8	F08F3.9	C54D10.10	F41C3.7	C36C9.3	NA	NA	NA	NA	ZK112.3	NA	F58F6.2	D2030.10	T10F2.5	Y19D10A.11	R07C3.7	NA	Y66H1A.3
B0395.1	C50C3.1	NA	NA	NA	NA	NA	NA	T19C4.1	C29E4.4	E04A4.4	F33D11.9	M01E5.6	M116.1	Y110A7A.4	NA	NA	F48D6.1	F49A5.8	F54F7.4	D1022.1	C54G4.4	C18H7.13	C18D11.1	F10A3.13	F14E5.4	F44F1.6	Y34D9B.1	NA	M04G12.1	ZK783.1	NA	ZK770.3	F08F8.7	C54D10.12	F41C6.6	C36E8.5	NA	NA	NA	NA	ZK112.4	NA	F58F9.7	D2089.4	T11G6.1	Y19D2B.2	R07H5.4	NA	Y69H2.6
B0395.2	C50C3.8	NA	NA	NA	NA	NA	NA	T19D12.6	C29E4.8	E04A4.5	F34D6.1	M02B7.3	M116.4	Y113G7A.9	NA	NA	F48E8.3	F49A5.9	F54G8.4	D1037.2	C54G6.2	C18H7.2	C18E9.7	F10A3.3	F14F3.2	F45D11.10	Y37A1B.5	NA	M153.2	NA	NA	ZK822.1	F08H9.3	C54D10.14	F41C6.7	C36F7.2	NA	NA	NA	NA	ZK154.6	NA	F58G6.6	D2092.3	T11G6.8	Y20C6A.2	R08C7.13	NA	Y6D11A.2
B0395.3	C50D2.9	NA	NA	NA	NA	NA	NA	T20D3.7	C29H12.1	E04F6.5	F35C11.6	M02E1.2	M117.6	Y113G7B.11	NA	NA	F48F7.6	F49C12.14	F54H5.4	D1044.7	C54G7.1	C18H9.6	C18G1.1	F10C1.2	F14F4.3	F45D11.5	Y37B11A.3	NA	M163.1	NA	NA	ZK867.1	F08H9.4	C54D10.5	F41E7.2	C37A5.7	NA	NA	NA	NA	ZK177.11	NA	F58H1.2	D2092.4	T12A2.3	Y25C1A.13	R08C7.9	NA	Y71H2AM.6
B0399.1	C50E3.11	NA	NA	NA	NA	NA	NA	T21B10.5	C29H12.2	EEED8.1	F35D11.3	M03B6.4	M142.1	Y116A8C.42	NA	NA	F49B2.2	F49C5.7	F55B12.1	D1054.9	C54G7.3	C18H9.7	C18G1.6	F10C1.3	F14H12.6	F45E12.3	Y37E11AR.6	NA	M176.11	NA	NA	NA	F09A5.3	C54D10.7	F41G3.16	C37C3.1	NA	NA	NA	NA	ZK287.4	NA	F59C6.7	D2092.6	T12E12.2	Y25C1A.6	R09B3.2	NA	Y73B3A.14
B0399.2	C50E3.13	NA	NA	NA	NA	NA	NA	T22E7.1	C29H12.5	EEED8.14	F35E12.2	M04B2.5	M151.8	Y17G9B.7	NA	NA	F49H12.1	F49H12.5	F55D12.2	D2005.2	C54H2.4	C23G10.10	C18H7.1	F10D11.3	F14H3.10	F45E4.11	Y38F1A.5	NA	M199.2	NA	NA	NA	F09E5.16	C54D10.8	F41G3.17	C38D4.1	NA	NA	NA	NA	ZK328.7	NA	F59C6.8	D2096.6	T13H5.7	Y27F2A.6	R09B3.3	NA	Y73B6BL.27
B0403.2	C50E3.5	NA	NA	NA	NA	NA	NA	T23G11.6	C30A5.3	EEED8.3	F35E12.3	M106.2	R02C2.1	Y22D7AL.7	NA	NA	F49H6.5	F52B10.1	F55F1.5	D2005.6	C55A1.12	C23H3.2	C18H7.11	F10D11.4	F14H3.11	F45E4.6	Y39A1A.15	NA	M28.1	NA	NA	NA	F09F7.1	C54D10.9	F42A10.1	C38D4.4	NA	NA	NA	NA	ZK470.5	NA	F59D12.2	D2096.9	T15H9.6	Y37A1B.1	R107.8	NA	Y74C9A.3
B0403.3	C50F2.2	NA	NA	NA	NA	NA	NA	T23H2.5	C30B5.1	EEED8.4	F35E2.8	M106.4	R02C2.6	Y23H5A.2	NA	NA	F52C6.11	F52C9.5	F56C9.7	D2024.2	C55C3.1	C23H3.7	C18H7.13	F10D7.1	F15A4.13	F45E6.2	Y39A1A.6	NA	M88.5	NA	NA	NA	F09F7.7	C54E10.2	F42D1.2	C38D4.6	NA	NA	NA	NA	ZK669.1	NA	F59D6.7	DY3.5	T16G1.11	Y37E11AL.9	R11.1	NA	Y75B12B.5
B0403.4	C50F4.12	NA	NA	NA	NA	NA	NA	T25B2.4	C30C11.2	F01F1.11	F35F11.1	M110.4	R04A9.7	Y23H5B.1	NA	NA	F52C6.14	F52E10.5	F56D12.4	D2030.10	C55C3.2	C23H4.3	C18H7.2	F10F2.2	F15A4.2	F45F2.12	Y39E4B.6	NA	M88.6	NA	NA	NA	F10A3.5	C54F6.1	F42G2.8	C39B5.6	NA	NA	NA	NA	ZK899.8	NA	F59E11.11	DY3.6	T17A3.9	Y37E3.3	R11A5.3	NA	Y75B8A.10
B0403.5	C50F4.14	NA	NA	NA	NA	NA	NA	T25G3.4	C30C11.4	F01F1.12	F35G12.10	M116.1	R04B3.2	Y32H12A.3	NA	NA	F52E10.1	F52H2.4	F56F10.2	D2063.1	C56A3.3	C23H5.2	C18H9.6	F11A1.3	F15B10.3	F45H11.1	Y39H10A.7	NA	PAR2.3	NA	NA	NA	F10B5.2	C54F6.12	F43E2.1	C39E9.13	NA	NA	NA	NA	NA	NA	F59E11.12	E01G6.1	T19H12.2	Y38C9A.1	R11E3.2	NA	Y75B8A.2
B0403.6	C50F4.16	NA	NA	NA	NA	NA	NA	T27A3.7	C30F12.2	F01F1.2	F35G12.4	M116.4	R04D3.4	Y32H12A.4	NA	NA	F52E4.1	F53A3.1	F56F11.5	D2089.4	C56E10.3	C23H5.3	C18H9.7	F11A5.9	F16B12.4	F46A9.6	Y41D4A.8	NA	R01B10.6	NA	NA	NA	F10B5.3	C54F6.13	F43H9.4	C39E9.14	NA	NA	NA	NA	NA	NA	F59F4.1	E02H4.1	T20F5.3	Y38E10A.3	R13A5.5	NA	Y87G2A.9
B0410.1	C50F7.4	NA	NA	NA	NA	NA	NA	T27B7.7	C30F12.4	F01F1.3	F35G12.9	M151.6	R06A4.2	Y34D9A.4	NA	NA	F52F12.6	F53A9.4	F56H11.2	D2096.10	CC4.2	C23H5.7	C23H3.2	F11C7.7	F16B4.8	F46C8.3	Y41D4B.21	NA	R03E9.2	NA	NA	NA	F10D7.1	C54F6.5	F44A2.2	C40H1.1	NA	NA	NA	NA	NA	NA	H01G02.2	E02H4.3	T21C12.4	Y39A1A.17	R13G10.2	NA	Y92C3B.3
B0410.2	C52A10.1	NA	NA	NA	NA	NA	NA	T28D6.6	C30G12.6	F01G4.6	F35G2.2	M151.8	R06A4.8	Y37A1B.5	NA	NA	F53A2.2	F53B3.3	F56H9.6	D2096.11	D1005.3	C23H5.8	C23H3.7	F11D11.11	F16G10.6	F46E10.2	Y41D4B.4	NA	R03H10.2	NA	NA	NA	F10E9.1	C55A6.3	F44C8.3	C41C4.4	NA	NA	NA	NA	NA	NA	H04M03.4	E02H4.4	T21D12.3	Y39G10AR.14	R52.1	NA	Y92H12BR.8
B0410.3	C52E12.1	NA	NA	NA	NA	NA	NA	T28F3.6	C30G12.7	F02A9.4	F35G2.3	M153.1	R06C7.8	Y37D8A.25	NA	NA	F53B3.1	F54C1.5	F57B7.2	E01H11.1	D1007.19	C24A1.1	C23H4.3	F11D11.6	F16G10.8	F46F3.1	Y42H9AR.1	NA	R05D3.3	NA	NA	NA	F10F2.2	C55A6.5	F44G3.8	C41C4.6	NA	NA	NA	NA	NA	NA	H05C05.4	E02H4.5	T22B2.1	Y40A1A.2	R52.7	NA	Y94H6A.12
B0412.1	C52E12.3	NA	NA	NA	NA	NA	NA	VC5.4	C30H6.7	F02E11.3	F35H10.6	M18.7	R06F6.1	Y37D8A.9	NA	NA	F53C3.11	F54C8.6	F57C7.2	E02A10.4	D1007.3	C24A1.2	C23H5.3	F11E6.3	F16G10.9	F46F6.2	Y43F4B.5	NA	R07C3.10	NA	NA	NA	F10G2.1	C55A6.6	F44G4.1	C41D11.3	NA	NA	NA	NA	NA	NA	H10E21.4	E02H9.2	T22C1.1	Y40B1B.6	R52.9	NA	ZC204.2
B0412.2	C52E4.4	NA	NA	NA	NA	NA	NA	VW02B12L.3	C30H6.8	F02E11.4	F35H8.7	R02C2.3	R06F6.11	Y38F1A.5	NA	NA	F53C3.2	F54C9.11	F57F5.3	E02H4.1	D1009.4	C24A11.2	C23H5.8	F12B6.3	F17A2.13	F47A4.2	Y43F4B.7	NA	R07C3.11	NA	NA	NA	F10G2.6	C55F2.1	F45C12.4	C41D11.4	NA	NA	NA	NA	NA	NA	H12C20.3	E02H9.8	T22C1.2	Y41D4B.14	T01C3.1	NA	ZC250.2
B0412.3	C53D6.4	NA	NA	NA	NA	NA	NA	W01C8.4	C30H7.2	F02E9.9	F36A2.1	R02C2.6	R07B1.12	Y39A1A.12	NA	NA	F53E10.2	F54D1.6	F57G8.5	E02H4.3	D1014.5	C24A3.1	C24A1.1	F13C5.6	F17A2.5	F47D12.4	Y43F8B.18	NA	R07D5.2	NA	NA	NA	F10G7.1	C56A3.1	F45E4.8	C41D11.5	NA	NA	NA	NA	NA	NA	H22K11.4	E03A3.3	T22C1.4	Y43F11A.1	T01H10.8	NA	ZC376.5
B0412.4	C54G6.1	NA	NA	NA	NA	NA	NA	W01C8.5	C31H1.8	F02H6.2	F36A2.7	R02D3.8	R07C3.1	Y39A1A.13	NA	NA	F53F4.11	F54D10.3	F57H12.2	E02H9.6	D1037.2	C24A3.2	C24A11.2	F13D12.3	F17A9.4	F47D12.5	Y43F8B.6	NA	R07H5.2	NA	NA	NA	F10G8.9	C56A3.2	F45F2.9	C41D11.7	NA	NA	NA	NA	NA	NA	JC8.12	E03A3.6	T23B3.1	Y43F11A.4	T01H8.2	NA	ZC8.6
B0414.1	C55A6.1	NA	NA	NA	NA	NA	NA	W01C9.1	C32A3.1	F02H6.3	F36A4.14	R03A10.3	R07C3.13	Y39A1A.14	NA	NA	F53H8.2	F54D12.9	F58A4.11	E02H9.7	D1046.4	C24A8.1	C24A11.5	F13E6.2	F17A9.5	F47G3.2	Y43F8C.13	NA	R119.5	NA	NA	NA	F11A1.2	CD4.1	F45H11.4	C41D11.9	NA	NA	NA	NA	NA	NA	JC8.16	E03G2.3	T23B5.1	Y44A6C.2	T02G6.4	NA	ZK1053.4
B0414.2	C55A6.4	NA	NA	NA	NA	NA	NA	W02B8.3	C32A3.3	F02H6.4	F36H12.1	R03H10.1	R07C3.2	Y39B6A.46	NA	NA	F53H8.3	F54E4.3	F58A4.14	E02H9.8	D1054.9	C24A8.5	C24A3.1	F13E6.6	F17C11.1	F47G4.7	Y43F8C.6	NA	R11D1.10	NA	NA	NA	F11A1.3	D1007.14	F46A8.7	C41G7.1	NA	NA	NA	NA	NA	NA	K01A2.1	E03H4.10	T23C6.3	Y44E3A.6	T02G6.5	NA	ZK1098.5
B0414.3	C55B6.1	NA	NA	NA	NA	NA	NA	W02D9.2	C32D5.11	F07B7.2	F36H5.5	R04A9.2	R07C3.6	Y39G10AR.13	NA	NA	F54A5.1	F54G8.4	F58B4.2	E03G2.2	D2005.2	C24B5.1	C24A3.2	F13E9.14	F17C11.17	F48E3.6	Y46B2A.1	NA	R11E3.1	NA	NA	NA	F11A5.13	D1022.6	F46B6.6	C41G7.3	NA	NA	NA	NA	NA	NA	K01C8.2	E04A4.7	T23D8.6	Y46C8AL.11	T02H6.2	NA	ZK1127.5
B0414.5	C55B7.1	NA	NA	NA	NA	NA	NA	W03C9.6	C32E8.3	F07H5.10	F37A4.5	R04B5.5	R07C3.7	Y39G10AR.5	NA	NA	F54C4.4	F55A12.7	F58B6.2	E03G2.4	D2007.3	C24B9.3	C24A8.5	F13E9.15	F17C11.2	F48F7.6	Y46G5A.18	NA	R11G1.4	NA	NA	NA	F11C1.10	D1044.1	F46C3.2	C41G7.4	NA	NA	NA	NA	NA	NA	K01D12.1	E04D5.5	T23G5.2	Y46G5A.13	T02H6.5	NA	ZK1248.19
B0414.6	C55B7.11	NA	NA	NA	NA	NA	NA	W03D8.11	C32E8.5	F08A8.7	F37C12.3	R04D3.4	R08C7.13	Y39G8B.1	NA	NA	F54D10.1	F55D12.2	F58D5.3	E04F6.2	D2024.2	C24D10.9	C24B5.1	F13G11.1	F17C11.4	F49B2.1	Y46G5A.19	NA	R12A1.4	NA	NA	NA	F11H8.2	D1046.5	F46F11.9	C41H7.3	NA	NA	NA	NA	NA	NA	K01D12.3	E04F6.10	T23G7.5	Y46G5A.24	T03F1.9	NA	ZK131.6
B0414.7	C55B7.5	NA	NA	NA	NA	NA	NA	W04A8.4	C32E8.8	F08D12.10	F37D6.4	R05H5.4	R08C7.9	Y39G8B.2	NA	NA	F54D10.9	F55F8.1	F58E6.1	F01D4.4	D2024.3	C24F3.3	C24B9.3	F13H8.3	F17C11.5	F49B2.7	Y47D3A.25	NA	R12E2.11	NA	NA	NA	F11H8.4	D1054.5	F46G10.2	C42C1.12	NA	NA	NA	NA	NA	NA	K01D12.5	E04F6.12	T24C2.2	Y46G5A.27	T04A8.14	NA	ZK1320.11
B0414.8	C55C3.3	NA	NA	NA	NA	NA	NA	W04G3.1	C32F10.1	F08F3.6	F38A5.7	R06A4.4	R09B3.2	Y39H10A.7	NA	NA	F54E7.5	F55H12.3	F58E6.3	F01D4.6	D2024.4	C24G6.7	C24F3.3	F14B6.2	F17E5.2	F49C12.10	Y47D3B.10	NA	R13F6.9	NA	NA	NA	F12A10.7	D1079.1	F46H5.2	C42C1.13	NA	NA	NA	NA	NA	NA	K01D12.9	E04F6.2	T24C4.1	Y47D3A.12	T04B8.2	NA	ZK1320.7
B0416.1	C55C3.5	NA	NA	NA	NA	NA	NA	W04G3.2	C32F10.5	F08F3.9	F38C2.5	R06A4.6	R107.8	Y40G12A.2	NA	NA	F54F7.6	F56D1.5	F58G1.7	F01D5.6	D2024.7	C24H11.8	C24G6.7	F14B8.4	F17E9.10	F49D11.10	Y47D3B.11	NA	R13H8.1	NA	NA	NA	F12F3.1	D1086.1	F46H5.7	C42C1.15	NA	NA	NA	NA	NA	NA	K02B12.3	EGAP1.1	T24D3.1	Y47D3A.29	T04B8.3	NA	ZK1321.3
B0416.2	C56A3.4	NA	NA	NA	NA	NA	NA	W04G3.3	C32F10.8	F08F8.4	F38C2.7	R06F6.6	R10E11.7	Y41D4A.3	NA	NA	F55C9.1	F56D2.3	F58G6.9	F01E11.3	D2030.10	C25A6.1	C24H10.5	F14D12.1	F17E9.11	F49E12.5	Y47D3B.9	NA	R144.7	NA	NA	NA	F13B12.3	D1086.8	F47B10.3	C42C1.8	NA	NA	NA	NA	NA	NA	K02B12.7	F01D4.6	T24E12.1	Y47G6A.8	T04D1.2	NA	ZK265.6
B0416.3	C56C10.1	NA	NA	NA	NA	NA	NA	W04G3.8	C33A12.3	F08G2.6	F39B2.10	R07B1.12	R11.1	Y41D4B.12	NA	NA	F55C9.10	F56D5.1	F58H7.8	F01E11.5	D2089.4	C25D7.15	C25A6.1	F14D12.4	F17E9.13	F52D2.8	Y47D9A.2	NA	R148.5	NA	NA	NA	F13B9.5	D2005.2	F47B8.2	C42D4.8	NA	NA	NA	NA	NA	NA	K02D3.2	F01D5.10	T24E12.11	Y47H9B.2	T04D3.2	NA	ZK287.8
B0416.4	C56C10.3	NA	NA	NA	NA	NA	NA	W07A12.6	C33B4.4	F08G5.1	F39B2.3	R07B7.10	R119.4	Y43F8C.13	NA	NA	F55C9.13	F56E3.4	F59B10.5	F01G10.10	DY3.5	C25D7.4	C25D7.15	F14D7.10	F17H10.3	F52E4.8	Y47G6A.6	NA	R166.5	NA	NA	NA	F13D12.10	D2007.5	F47B8.3	C43E11.11	NA	NA	NA	NA	NA	NA	K02E7.1	F01E11.3	T24E12.13	Y48A6B.5	T05D4.2	NA	ZK430.7
B0416.5	CC8.2	NA	NA	NA	NA	NA	NA	W08F4.6	C33C12.9	F08H9.1	F39C12.2	R07C3.15	R12B2.4	Y45F10D.11	NA	NA	F55C9.14	F57B1.6	F59B10.6	F01G12.6	E01G4.6	C25D7.5	C25D7.4	F14E5.3	F18A1.4	F52H2.1	Y48G1C.12	NA	T01B10.4	NA	NA	NA	F13D12.3	D2013.1	F47D2.5	C43E11.12	NA	NA	NA	NA	NA	NA	K03A11.6	F01G10.10	T24H10.3	Y48D7A.1	T05F1.13	NA	ZK507.6
B0416.6	CD4.6	NA	NA	NA	NA	NA	NA	Y102A11A.5	C33F10.14	F08H9.3	F39F10.3	R07H5.4	R12H7.5	Y45G5AM.5	NA	NA	F55C9.4	F57F5.2	F59C12.1	F02A9.2	E01G6.1	C25E10.10	C25D7.5	F14F8.1	F18C12.4	F53A2.3	Y48G9A.4	NA	T01B10.5	NA	NA	NA	F13D12.4	D2013.8	F47D2.8	C43E11.2	NA	NA	NA	NA	NA	NA	K03H1.3	F01G12.6	T25G3.1	Y48E1B.7	T05H10.4	NA	ZK512.3
B0416.7	CD4.7	NA	NA	NA	NA	NA	NA	Y105C5A.24	C33F10.4	F09C3.3	F39H11.5	R07H5.7	R52.1	Y47D3A.1	NA	NA	F55C9.7	F58A4.11	F59F5.7	F02A9.3	E01H11.1	C25E10.13	C25E10.10	F14F8.13	F18E2.3	F53B2.6	Y49A10A.2	NA	T01B6.3	NA	NA	NA	F13D2.1	D2023.1	F47E1.2	C44B7.1	NA	NA	NA	NA	NA	NA	K04A8.1	F02D10.5	T26C11.7	Y49F6B.3	T06E4.3	NA	ZK546.13
B0432.1	D1007.16	NA	NA	NA	NA	NA	NA	Y105E8B.9	C33H5.19	F09D1.1	F40F11.3	R08C7.9	R52.9	Y47G6A.24	NA	NA	F55C9.8	F58A4.14	F59G1.4	F02C12.1	E02H4.1	C25E10.3	C25E10.11	F14F8.8	F18E2.5	F53C11.7	Y49F6C.4	NA	T01D1.2	NA	NA	NA	F13H8.11	D2023.3	F48G7.3	C44B7.12	NA	NA	NA	NA	NA	NA	K04G11.3	F02D8.1	T26E3.3	Y51B9A.4	T07D1.4	NA	ZK593.6
B0432.10	D1007.5	NA	NA	NA	NA	NA	NA	Y17G9A.1	C33H5.6	F09E5.15	F40F4.1	R08E3.4	T01G9.4	Y47G6A.28	NA	NA	F55G7.2	F58B6.2	H01G02.2	F02E8.1	E02H9.2	C25E10.5	C25E10.13	F14F9.8	F19C6.5	F53G2.1	Y50D4A.4	NA	T01G6.2	NA	NA	NA	F14D12.6	D2023.7	F49A5.8	C44B9.5	NA	NA	NA	NA	NA	NA	K06H7.2	F02E8.2	T26E3.8	Y51H1A.6	T07D3.7	NA	ZK632.7
B0432.11	D1014.2	NA	NA	NA	NA	NA	NA	Y17G9B.3	C34B2.2	F09G2.2	F40F4.7	R09B3.3	T02G6.11	Y47G6A.7	NA	NA	F56A4.12	F58D5.2	H01M10.2	F02E8.2	E03A3.6	C25F6.6	C25E10.3	F14H12.1	F19C7.3	F53H8.3	Y50D7A.4	NA	T01H3.3	NA	NA	NA	F14D2.14	D2024.2	F49E10.1	C45B11.1	NA	NA	NA	NA	NA	NA	K07E8.6	F02E9.5	T27A3.2	Y51H7BR.1	T08E11.5	NA	ZK637.14
B0432.12	D1022.7	NA	NA	NA	NA	NA	NA	Y17G9B.7	C34B2.5	F09G2.8	F40G9.10	R10E4.11	T02G6.4	Y47G6A.8	NA	NA	F56A6.4	F58E10.1	H04M03.4	F07A11.4	E03D2.2	C25F6.8	C25E10.5	F15A4.6	F19F10.1	F54B11.3	Y50E8A.4	NA	T02C1.2	NA	NA	NA	F14D2.8	D2024.7	F49E12.10	C45G3.5	NA	NA	NA	NA	NA	NA	K08B12.1	F07A11.1	T27C10.3	Y51H7BR.2	T08E11.6	NA	ZK652.3
B0432.13	D1037.4	NA	NA	NA	NA	NA	NA	Y23H5B.8	C34B2.6	F09G8.4	F40G9.12	R10E9.1	T02G6.5	Y47H9C.7	NA	NA	F56A8.8	F58E2.4	H06H21.10	F07A5.3	E03G2.2	C25F9.10	C25F6.8	F15B9.11	F19H8.1	F54C8.3	Y51F10.3	NA	T02C5.3	NA	NA	NA	F14D7.3	D2024.8	F52E4.4	C45G9.2	NA	NA	NA	NA	NA	NA	K08C9.5	F07C3.2	T27E9.6	Y51H7C.15	T11B7.1	NA	ZK783.7
B0432.14	D1044.6	NA	NA	NA	NA	NA	NA	Y32B12B.4	C34B2.7	F10D11.1	F40G9.14	R11.1	T03F1.9	Y48A6C.3	NA	NA	F56C3.6	F58F12.2	H11E01.3	F07B10.1	E03G2.3	C25F9.14	C25F9.1	F15B9.5	F19H8.2	F54D11.1	Y51H7C.5	NA	T02E9.5	NA	NA	NA	F14F4.1	D2030.2	F52F12.7	C46C2.7	NA	NA	NA	NA	NA	NA	K08D12.5	F07C4.11	T27E9.8	Y53G8B.4	T12G3.2	NA	ZK795.3
B0432.2	D1054.2	NA	NA	NA	NA	NA	NA	Y32F6A.4	C34B7.2	F10D2.5	F40G9.18	R11.4	T04A11.3	Y48E1B.12	NA	NA	F56D5.5	F58G6.6	H14E04.1	F07C3.1	E03H4.10	C25F9.15	C25F9.11	F15C11.1	F20B6.9	F54F2.2	Y51H7C.9	NA	T02G5.8	NA	NA	NA	F14F9.2	D2092.10	F53A9.5	C46F11.3	NA	NA	NA	NA	NA	NA	K08E7.4	F07G11.7	T28A8.3	Y54G11A.17	T13G4.1	NA	ZK930.6
B0432.3	D1054.3	NA	NA	NA	NA	NA	NA	Y32F6B.3	C34B7.4	F10D2.7	F40G9.19	R11A5.3	T04B8.3	Y48G1C.9	NA	NA	F56F4.1	F59B10.1	H14N18.1	F07C3.3	E03H4.8	C25F9.16	C25F9.12	F15D3.6	F21A10.4	F54F7.1	Y53C12A.4	NA	T03F1.8	NA	NA	NA	F14H3.11	DH11.1	F53B7.5	C47B2.2	NA	NA	NA	NA	NA	NA	K08E7.6	F07G6.6	T28D6.6	Y55B1AR.3	T13H2.4	NA	NA
B0432.4	D1081.7	NA	NA	NA	NA	NA	NA	Y37D8A.2	C34C12.2	F10D7.5	F40G9.9	R11E3.6	T04F8.1	Y48G8AL.13	NA	NA	F56F4.8	F59B10.2	H22K11.4	F07D10.1	E04F6.2	C25F9.4	C25F9.14	F15E11.11	F21D5.4	F55A4.1	Y54E2A.12	NA	T03F6.1	NA	NA	NA	F15A2.3	DH11.2	F53C11.1	C47B2.3	NA	NA	NA	NA	NA	NA	K08E7.8	F07H5.8	T28D9.1	Y55F3BR.8	T13H2.5	NA	NA
B0432.5	D1081.9	NA	NA	NA	NA	NA	NA	Y37E11B.2	C34C12.3	F10E7.2	F40H6.4	R13A1.7	T05C3.5	Y48G8AL.7	NA	NA	F56G4.2	F59C12.1	H34I24.2	F08B12.1	EGAP1.1	C25F9.5	C25F9.16	F15E6.4	F21D9.1	F55A4.5	Y54G11A.5	NA	T03G11.4	NA	NA	NA	F15D3.7	DH11.3	F53F4.11	C47B2.4	NA	NA	NA	NA	NA	NA	K08F8.7	F08B4.4	W01G7.5	Y56A3A.10	T14F9.2	NA	NA
B0432.6	D1086.4	NA	NA	NA	NA	NA	NA	Y38E10A.13	C34C12.4	F10E9.7	F41E6.13	R13A5.5	T05D4.2	Y49E10.1	NA	NA	F56G4.3	F59C6.8	H36L18.2	F08B12.3	EGAP5.1	C25F9.7	C25F9.5	F15G9.4	F22B7.13	F55A4.8	Y55B1AL.3	NA	T04A11.2	NA	NA	NA	F16B4.2	E01A2.10	F53F4.2	C47B2.5	NA	NA	NA	NA	NA	NA	K09B11.10	F08B6.2	W02A11.4	Y56A3A.11	T14G8.2	NA	NA
B0432.7	D2023.6	NA	NA	NA	NA	NA	NA	Y38H6C.16	C34C12.8	F10G2.4	F41F3.6	R52.1	T05G5.10	Y49E10.6	NA	NA	F56H6.2	F59D6.7	H39E23.1	F08B12.5	F01D4.6	C25G6.1	C25F9.6	F15G9.6	F22B8.6	F55C9.3	Y55B1BR.4	NA	T04A11.5	NA	NA	NA	F16D3.6	E01A2.7	F53H2.1	C47D12.6	NA	NA	NA	NA	NA	NA	K09C8.4	F08F3.1	W02D9.1	Y56A3A.14	T16A1.8	NA	NA
B0432.8	D2024.5	NA	NA	NA	NA	NA	NA	Y39E4B.2	C34C6.4	F10G2.6	F42A10.9	R52.7	T05H10.4	Y49F6B.1	NA	NA	F57F4.2	F59E11.11	H42K12.3	F08B4.2	F01D4.7	C25G6.3	C25F9.7	F15H10.6	F22B8.7	F55C9.5	Y55F3AR.2	NA	T04C9.6	NA	NA	NA	F17B5.9	E01G4.3	F54B8.2	C47E12.2	NA	NA	NA	NA	NA	NA	K09E3.6	F08F3.10	W02H5.2	Y56A3A.15	T16G12.4	NA	NA
B0432.9	D2030.2	NA	NA	NA	NA	NA	NA	Y39H10A.6	C34D4.13	F10G7.8	F42A6.8	R53.6	T05H10.5	Y50E8A.4	NA	NA	F57G9.3	F59F5.7	JC8.14	F08B6.4	F01D5.10	C25H3.15	C25G6.1	F16A11.1	F22E5.1	F55D10.3	Y57G11C.15	NA	T05A12.2	NA	NA	NA	F17C11.4	E01H11.3	F54C1.1	C47E12.5	NA	NA	NA	NA	NA	NA	K09F6.10	F08G12.8	W03D2.4	Y57A10A.9	T17A3.1	NA	NA
B0454.1	D2030.6	NA	NA	NA	NA	NA	NA	Y41G9A.2	C34D4.4	F10G8.3	F42A8.2	T01H10.8	T07A9.15	Y51H4A.4	NA	NA	F58A4.4	F59G1.4	K01A12.2	F08C6.1	F01D5.9	C25H3.5	C25G6.4	F16H6.2	F22E5.12	F55F8.5	Y67D8A.1	NA	T05A6.1	NA	NA	NA	F17C11.8	E02A10.2	F54C9.1	C47E8.4	NA	NA	NA	NA	NA	NA	K10D11.2	F08H9.12	W03H9.4	Y57G11C.1134	T17A3.12	NA	NA
B0454.10	D2030.7	NA	NA	NA	NA	NA	NA	Y42A5A.3	C34E10.2	F10G8.9	F42E11.1	T02G6.5	T07C4.1	Y54E10A.14	NA	NA	F58B3.9	H02I12.3	K01A2.10	F08F3.10	F01E11.3	C26B2.4	C25H3.15	F17C8.1	F22E5.16	F56A11.3	Y6D11A.2	NA	T05A6.2	NA	NA	NA	F17C11.9	E02A10.3	F54C9.9	C47E8.8	NA	NA	NA	NA	NA	NA	K11E4.2	F08H9.5	W06H3.1	Y62E10A.17	T17A3.4	NA	NA
B0454.5	D2063.3	NA	NA	NA	NA	NA	NA	Y43D4A.3	C34E10.5	F11A10.1	F42G4.2	T02H6.5	T07C4.10	Y54E10A.15	NA	NA	F58D2.1	H02I12.4	K01D12.3	F08G12.11	F01E11.5	C26B2.5	C25H3.5	F18A12.8	F22E5.2	F56A12.1	Y71F9AL.17	NA	T05A7.11	NA	NA	NA	F18C5.10	E02A10.5	F54D1.5	C47G2.3	NA	NA	NA	NA	NA	NA	K11H12.11	F09B12.1	W08E12.1	Y67D8C.3	T17A3.6	NA	NA
B0454.6	D2096.12	NA	NA	NA	NA	NA	NA	Y43D4A.5	C34E10.8	F11A5.12	F43C11.10	T03D8.1	T07C4.12	Y54E10BR.5	NA	NA	F58D2.2	H11E01.3	K02C4.5	F08H9.6	F01G10.10	C26B2.8	C26B2.3	F18E2.6	F22E5.20	F56F10.4	Y71F9AL.6	NA	T05E11.3	NA	NA	NA	F18E2.4	E02C12.13	F54D10.2	C47G2.4	NA	NA	NA	NA	NA	NA	K12G11.5	F09B12.5	W09B6.2	Y6D1A.1	T17A3.7	NA	NA
B0454.8	D2096.2	NA	NA	NA	NA	NA	NA	Y43E12A.3	C34G6.5	F11A5.9	F43E2.2	T03F1.3	T08A9.1	Y54E2A.3	NA	NA	F58D5.1	H14A12.4	K02E11.11	F09B12.1	F01G12.6	C26B9.2	C26B2.4	F18E3.5	F22E5.3	F56H9.5	Y71F9AL.9	NA	T05E11.5	NA	NA	NA	F18E2.5	E02C12.4	F54D5.1	C48B4.11	NA	NA	NA	NA	NA	NA	K12H6.12	F09B12.6	W09G3.1	Y71A12B.17	T18D3.1	NA	NA
B0454.9	D2096.4	NA	NA	NA	NA	NA	NA	Y43H11AL.1	C34H4.5	F11D11.12	F43G6.5	T03F6.3	T08E11.5	Y54G11A.11	NA	NA	F58D5.7	H14E04.1	K02H8.1	F09B12.3	F02C12.1	C26B9.5	C26B2.5	F18E9.3	F22F1.1	F57B9.6	Y71F9AM.6	NA	T05E11.6	NA	NA	NA	F18E3.2	E02C12.5	F54E4.2	C48B4.4	NA	NA	NA	NA	NA	NA	M01D7.4	F09C3.1	W10G6.1	Y71G10AL.1	T19H5.4	NA	NA
B0457.1	DC2.3	NA	NA	NA	NA	NA	NA	Y45F3A.9	C35B1.1	F11G11.2	F43G9.10	T04A11.3	T08E11.6	Y54G9A.9	NA	NA	F58E1.10	H14N18.1	K03A11.3	F09B12.6	F02C9.2	C26C6.8	C26B2.8	F19B2.5	F22F4.2	F57C2.2	Y71F9B.5	NA	T05G5.2	NA	NA	NA	F18G5.4	E03G2.2	F54G2.1	C48B4.7	NA	NA	NA	NA	NA	NA	M03B6.2	F09C6.12	Y102A5C.18	Y71G12B.15	T20B12.6	NA	NA
B0457.2	DY3.4	NA	NA	NA	NA	NA	NA	Y47D3B.3	C35D10.5	F12D9.2	F44E5.2	T04A8.14	T08E11.7	Y55D5A.6	NA	NA	F58E1.11	H19M22.3	K03H1.10	F09B9.4	F02C9.3	C26D10.6	C26B9.5	F19B2.7	F22F7.1	F57G9.3	Y71H2AM.17	NA	T05G5.6	NA	NA	NA	F19G12.10	E04D5.2	F54H12.1	C48B4.9	NA	NA	NA	NA	NA	NA	M03C11.1	F09E10.5	Y104H12D.2	Y73B6BL.33	T22C8.4	NA	NA
B0457.4	DY3.7	NA	NA	NA	NA	NA	NA	Y47D7A.14	C35D10.6	F12E12.5	F44E7.5	T04D3.1	T09B9.4	Y56A3A.12	NA	NA	F58E1.12	H22K11.4	K03H1.5	F09D12.2	F02D10.5	C26E1.2	C26C6.3	F19C7.8	F22G12.3	F58A4.4	Y71H2AM.19	NA	T06D10.1	NA	NA	NA	F19G12.3	E04D5.3	F55A4.4	C48B6.3	NA	NA	NA	NA	NA	NA	M03F8.4	F09E5.12	Y104H12D.4	Y73F8A.36	T22D1.11	NA	NA
B0457.6	DY3.8	NA	NA	NA	NA	NA	NA	Y47G6A.19	C35D10.7	F13B12.1	F44F1.4	T04D3.2	T10B5.8	Y56A3A.29	NA	NA	F58E1.13	H23L24.5	K04A8.9	F09E5.12	F02D8.3	C26F1.10	C26E1.2	F19D8.1	F23B12.8	F58B3.9	Y73B3A.14	NA	T06E6.5	NA	NA	NA	F19H6.2	E04F6.4	F55A4.8	C48D1.2	NA	NA	NA	NA	NA	NA	M04G12.3	F09E5.14	Y105C5B.1413	Y76B12C.3	T23B12.7	NA	NA
B0462.1	E_BE45912.2	NA	NA	NA	NA	NA	NA	Y47G6A.7	C35D6.4	F13D12.3	F44F1.7	T05A12.3	T11A5.5	Y57G11C.38	NA	NA	F58E1.14	H24G06.1	K04G11.2	F09E8.6	F07A11.1	C26F1.6	C26F1.1	F19G12.4	F23C8.3	F58E1.2	Y75B8A.1	NA	T07A9.10	NA	NA	NA	F20A1.10	E04F6.8	F55B12.10	C48E7.3	NA	NA	NA	NA	NA	NA	M05B5.2	F09E8.6	Y105C5B.19	Y77E11A.6	T23C6.4	NA	NA
B0462.3	E01A2.1	NA	NA	NA	NA	NA	NA	Y48A5A.1	C35E7.8	F13D12.5	F44G3.14	T05D4.2	T11B7.1	Y62E10A.11	NA	NA	F58E1.2	H27C11.1	K04H4.5	F09F9.2	F07A11.4	C26G2.2	C26F1.10	F19G12.8	F23D12.4	F58E1.8	Y75B8A.13	NA	T07A9.2	NA	NA	NA	F20A1.4	E04F6.9	F55B12.4	C49A9.10	NA	NA	NA	NA	NA	NA	M142.2	F09E8.7	Y105E8B.3	Y80D3A.3	T24C12.3	NA	NA
B0462.4	E01A2.4	NA	NA	NA	NA	NA	NA	Y48G1C.12	C36A4.4	F13E9.6	F45B8.1	T05E7.5	T11F9.11	Y62E10A.13	NA	NA	F58E1.3	H34I24.3	K04H4.7	F09G2.5	F07C3.1	C27A2.2	C26F1.2	F19H8.1	F23D12.5	F58G6.1	Y75B8A.2	NA	T07A9.3	NA	NA	NA	F20D1.10	EGAP5.1	F55C12.5	C49C3.6	NA	NA	NA	NA	NA	NA	M153.3	F09F7.5	Y106G6A.5	Y82E9BL.2	T24H10.6	NA	NA
B0462.5	E01F3.1	NA	NA	NA	NA	NA	NA	Y49A10A.2	C36A4.5	F13G3.5	F45B8.2	T05H10.5	T12D8.10	Y65B4BR.8	NA	NA	F58E1.5	H38K22.5	K05B2.2	F09G8.5	F07C3.10	C27A2.5	C26F1.5	F20A1.4	F23F12.9	F58H1.5	Y82E9BR.17	NA	T07C5.1	NA	NA	NA	F20D12.7	EGAP9.4	F55C12.6	C49C3.7	NA	NA	NA	NA	NA	NA	M163.5	F09F7.8	Y106G6H.6	Y8A9A.5	T25D1.3	NA	NA
B0464.1	E01G4.3	NA	NA	NA	NA	NA	NA	Y51H7C.12	C36A4.9	F13H10.3	F45C12.10	T07D4.2	T12E12.3	Y66D12A.12	NA	NA	F58E1.8	H39E23.1	K06A1.1	F10A3.11	F07C3.3	C27A2.7	C26F1.6	F20A1.7	F25B4.6	F59A6.1	ZC132.4	NA	T07D3.4	NA	NA	NA	F20D6.8	F01D4.8	F55C12.7	C49C8.3	NA	NA	NA	NA	NA	NA	M6.4	F09F9.1	Y106G6H.9	Y95B8A.8	T26C11.5	NA	NA
B0464.2	E02H1.2	NA	NA	NA	NA	NA	NA	Y53F4B.20	C36B1.11	F14D2.11	F45C12.11	T08B1.6	T12G3.2	Y67A10A.4	NA	NA	F58E1.9	H41C03.1	K06A9.2	F10B5.4	F07C4.1	C27A2.8	C27A2.5	F20B6.2	F25B5.7	F59A6.5	ZC132.6	NA	T08B1.3	NA	NA	NA	F20E11.2	F01F1.14	F55D12.4	C49F5.3	NA	NA	NA	NA	NA	NA	M88.4	F09F9.2	Y110A2AL.1	Y97E10AM.1	T26H2.1	NA	NA
B0464.3	E02H4.6	NA	NA	NA	NA	NA	NA	Y54F10AM.6	C36B1.12	F14D2.13	F45C12.12	T08D10.1	T13B5.6	Y67D2.3	NA	NA	F58E10.2	K02E10.4	K07A9.2	F10C1.7	F07C4.11	C27A7.3	C27A2.7	F20B6.6	F25E2.5	F59C12.3	ZC250.2	NA	T08D2.1	NA	NA	NA	F20G2.6	F01G10.2	F55F8.2	C49F5.6	NA	NA	NA	NA	NA	NA	MTCE.11	F09F9.3	Y110A2AM.1	Y9C9A.13	T26H2.3	NA	NA
B0464.4	E04A4.5	NA	NA	NA	NA	NA	NA	Y54G2A.4	C36B1.3	F14D2.4	F45C12.13	T09B9.4	T13G4.1	Y69A2AR.1	NA	NA	F58E10.3	K02E10.5	K07C11.8	F10E7.9	F07F6.6	C27C12.5	C27A2.8	F20E11.7	F25G6.1	F59E12.10	ZC404.9	NA	T10B9.8	NA	NA	NA	F20H11.1	F01G10.4	F55F8.3	C49H3.5	NA	NA	NA	NA	NA	NA	MTCE.16	F09F9.5	Y110A2AM.4	ZC204.11	T26H2.4	NA	NA
B0464.5	E04F6.11	NA	NA	NA	NA	NA	NA	Y55F3AM.11	C36B1.4	F14D7.2	F45C12.14	T10B10.3	T13H2.4	Y69A2AR.30	NA	NA	F58E10.5	K02E11.11	K07D4.8	F10G7.11	F07H5.6	C27D6.1	C27A7.1	F20H11.3	F25G6.3	F59E12.6	ZC434.6	NA	T10H4.10	NA	NA	NA	F21A3.2	F01G10.8	F55G11.1	C49H3.9	NA	NA	NA	NA	NA	NA	MTCE.21	F09G8.10	Y110A7A.13	ZC204.7	T26H2.5	NA	NA
B0464.6	EEED8.14	NA	NA	NA	NA	NA	NA	Y55F3AM.15	C36B1.7	F14H3.3	F45C12.15	T10B11.7	T14G8.1	Y69F12A.2	NA	NA	F58E6.6	K03A1.2	K07G5.3	F11A5.5	F07H5.7	C27D6.6	C27A7.3	F21C10.7	F26A1.12	H12D21.7	ZC506.3	NA	T11B7.2	NA	NA	NA	F21A3.5	F02A9.7	F55H2.1	C50B6.2	NA	NA	NA	NA	NA	NA	MTCE.31	F09G8.5	Y110A7A.4	ZC204.8	T27A1.2	NA	NA
B0464.7	F01F1.12	NA	NA	NA	NA	NA	NA	Y56A3A.22	C36B1.8	F14H3.4	F45C12.5	T10B5.8	T16A1.8	Y69H2.6	NA	NA	F58E6.8	K03A11.2	K08C7.1	F11C3.2	F07H5.8	C27F2.2	C27B7.9	F21C10.8	F26D10.12	H13N06.3	ZK1127.5	NA	T12A7.1	NA	NA	NA	F21C10.10	F02C12.1	F56A12.2	C50B6.3	NA	NA	NA	NA	NA	NA	MTCE.34	F09G8.9	Y110A7A.8	ZC204.9	T27A1.3	NA	NA
B0464.8	F01F1.2	NA	NA	NA	NA	NA	NA	Y62F5A.1	C36C9.1	F14H3.5	F45C12.7	T10E10.2	T17A3.12	Y6D11A.1	NA	NA	F58G4.4	K03H1.5	K08C9.5	F11C7.1	F07H5.9	C27H5.1	C27C12.5	F21C3.1	F26D12.1	H20J04.4	ZK1307.6	NA	T12C9.6	NA	NA	NA	F21H12.4	F02C9.2	F56D12.5	C50B8.1	NA	NA	NA	NA	NA	NA	R01H10.5	F10B5.9	Y111B2A.16	ZC239.21	T27F2.3	NA	NA
B0464.9	F01F1.3	NA	NA	NA	NA	NA	NA	Y65B4BR.2	C36C9.2	F14H3.6	F45D3.1	T11F9.11	T17A3.4	Y71F9B.3	NA	NA	F59A1.10	K03H1.6	K08D12.2	F11C7.5	F08A10.1	C27H5.8	C27C12.7	F21F3.6	F26E4.12	H23N18.2	ZK131.2	NA	T12G3.4	NA	NA	NA	F21H7.12	F02D10.1	F56D2.5	C50B8.2	NA	NA	NA	NA	NA	NA	R01H10.6	F10C1.2	Y111B2A.18	ZC504.3	T28C6.3	NA	NA
B0478.1	F01F1.4	NA	NA	NA	NA	NA	NA	Y66D12A.15	C36C9.3	F15B10.2	F45H10.2	T13H2.5	T17A3.7	Y71G12B.1	NA	NA	F59A2.4	K06A1.1	K08D8.3	F11D5.1	F08A10.2	C27H6.1	C27D6.12	F21H12.2	F26F12.7	H24O09.2	ZK131.3	NA	T16A1.1	NA	NA	NA	F22B8.5	F02D8.4	F56F10.2	C50C3.1	NA	NA	NA	NA	NA	NA	R01H2.5	F10C1.5	Y111B2A.19	ZK177.10	T28F2.2	NA	NA
B0478.3	F01F1.8	NA	NA	NA	NA	NA	NA	Y66D12A.17	C36F7.2	F15B9.4	F45H11.2	T14G10.8	T19C3.5	Y71G12B.15	NA	NA	F59A3.9	K06A4.3	K08E7.6	F11E6.2	F08A8.3	C28C12.13	C27D6.6	F21H7.2	F26F4.8	H28G03.6	ZK131.6	NA	T19H12.9	NA	NA	NA	F22E12.1	F02E11.7	F56F10.3	C50C3.8	NA	NA	NA	NA	NA	NA	R01H2.8	F10C2.3	Y111B2A.24	ZK250.6	T28H11.4	NA	NA
B0491.1	F01G10.1	NA	NA	NA	NA	NA	NA	Y67A6A.2	C37A5.7	F15C11.2	F46A9.4	T14G8.2	T19E10.1	Y71H2AM.20	NA	NA	F59B1.10	K06A5.8	K08H10.3	F11E6.5	F08A8.4	C28C12.4	C27F2.2	F21H7.9	F26G5.9	JC8.4	ZK131.7	NA	T20F10.1	NA	NA	NA	F22E12.4	F02H6.5	F56F3.6	C50D2.8	NA	NA	NA	NA	NA	NA	R03H4.1	F10E9.10	Y113G7A.9	ZK328.2	W01A11.5	NA	NA
B0491.2	F01G4.3	NA	NA	NA	NA	NA	NA	Y69A2AL.1	C37C3.1	F15E6.1	F46B6.3	T15H9.6	T19H12.2	Y71H2AM.6	NA	NA	F59B2.3	K07D4.7	K09A11.5	F11E6.8	F08B12.3	C28C12.5	C27H5.1	F22A3.1	F27C1.4	K01G5.1	ZK328.8	NA	T21C9.12	NA	NA	NA	F22E5.11	F07B10.5	F57C7.2	C50E3.11	NA	NA	NA	NA	NA	NA	R04B5.5	F10F2.3	Y113G7B.18	ZK418.9	W02D3.9	NA	NA
B0491.3	F01G4.4	NA	NA	NA	NA	NA	NA	Y69A2AR.13	C37C3.9	F15H10.3	F46G10.3	T16A1.8	T20C4.1	Y73B3A.14	NA	NA	F59D6.5	K07G5.3	K09F5.3	F11E6.9	F08B12.5	C28F5.2	C27H5.8	F22D6.15	F27D9.6	K01G5.10	ZK455.1	NA	T21E8.6	NA	NA	NA	F22E5.12	F07B7.13	F57F4.2	C50E3.12	NA	NA	NA	NA	NA	NA	R04E5.10	F10G8.4	Y113G7B.24	ZK430.5	W04A8.1	NA	NA
B0491.4	F01G4.6	NA	NA	NA	NA	NA	NA	Y70C5C.1	C37H5.3	F16A11.3	F47B10.9	T16G12.4	T20D4.19	Y73B6BL.9	NA	NA	F59G1.8	K08C7.7	K10B3.1	F12D9.1	F08D12.12	C28G1.1	C28C12.11	F22E5.8	F27E11.3	K01G5.6	ZK512.3	NA	T21G5.5	NA	NA	NA	F22E5.13	F07B7.14	F57G8.6	C50E3.13	NA	NA	NA	NA	NA	NA	R06F6.9	F10G8.5	Y113G7B.28	ZK520.4	W04A8.3	NA	NA
B0491.5	F02A9.6	NA	NA	NA	NA	NA	NA	Y70D2A.1	C37H5.8	F16D3.2	F47G3.3	T16G12.8	T20F5.7	Y74C9A.3	NA	NA	H03G16.5	K08D12.2	K10G6.1	F13A2.5	F08F3.4	C28G1.5	C28C12.13	F22H10.2	F27E5.2	K02B12.2	ZK550.6	NA	T22A3.3	NA	NA	NA	F22F4.3	F07C4.5	F57G9.2	C50E3.5	NA	NA	NA	NA	NA	NA	R07A4.4	F11A5.5	Y116A8A.9	ZK6.3	W04A8.5	NA	NA
B0491.6	F02D10.6	NA	NA	NA	NA	NA	NA	Y71F9B.9	C38C10.2	F17A9.6	F47H4.1	T17A3.1	T21D12.3	Y75B8A.17	NA	NA	H04D03.4	K08E5.3	K10G9.1	F13B10.2	F08G12.11	C28G1.6	C28C12.4	F23A7.3	F28D1.2	K02B12.9	ZK622.3	NA	T22B2.4	NA	NA	NA	F23D12.1	F07F6.5	F58B3.4	C50F2.2	NA	NA	NA	NA	NA	NA	R07B7.9	F11C3.2	Y116A8B.1	ZK632.6	W08F4.12	NA	NA
B0491.7	F02E11.3	NA	NA	NA	NA	NA	NA	Y71H2AM.20	C38D4.1	F17C11.9	F47H4.10	T17A3.12	T22A3.6	Y75B8A.2	NA	NA	H13N06.5	K08E7.6	K10G9.2	F13B12.3	F08H9.7	C28H8.5	C28C12.5	F23C8.11	F28H1.1	K02D3.1	ZK632.7	NA	T22C8.5	NA	NA	NA	F23F12.12	F07G11.1	F58E10.7	C50F4.12	NA	NA	NA	NA	NA	NA	R07E3.3	F11E6.10	Y116A8C.20	ZK637.5	W08F4.13	NA	NA
B0491.8	F02E8.4	NA	NA	NA	NA	NA	NA	Y80D3A.5	C38D4.4	F18A1.5	F48D6.1	T17A3.3	T22B11.1	Y82E9BR.1	NA	NA	H23N18.1	K08F8.2	K11C4.2	F13B12.4	F09B12.1	C28H8.6	C28F5.2	F23D12.6	F29A7.1	K02E10.2	ZK783.1	NA	T22F3.3	NA	NA	NA	F23H11.8	F07G11.4	F58E2.4	C50F4.14	NA	NA	NA	NA	NA	NA	R07E5.4	F11F1.8	Y116A8C.9	ZK652.1	W08F4.2	NA	NA
B0495.10	F02E9.4	NA	NA	NA	NA	NA	NA	ZC101.3	C38D4.6	F18A11.1	F49B2.1	T17A3.6	T22B7.3	Y82E9BR.17	NA	NA	H24K24.2	K09E3.6	K11D12.10	F13D11.4	F09B12.5	C29E6.4	C28G1.1	F25B5.3	F29A7.2	K02E7.6	ZK783.4	NA	T22G5.5	NA	NA	NA	F25B4.7	F07G11.5	F58G11.4	C50F7.4	NA	NA	NA	NA	NA	NA	R07G3.6	F12D9.1	Y119C1A.1	ZK652.6	W09B6.3	NA	NA
B0495.2	F02H6.2	NA	NA	NA	NA	NA	NA	ZC13.1	C39B5.6	F18E2.2	F49B2.2	T17A3.7	T22B7.5	Y95D11A.3	NA	NA	H24O09.2	K10C3.3	K12B6.9	F13D12.9	F09B9.4	C29F3.2	C28G1.5	F25C8.3	F29F11.2	K02E7.7	ZK792.1	NA	T23G4.1	NA	NA	NA	F25B5.5	F07G11.9	F58G6.2	C52E12.1	NA	NA	NA	NA	NA	NA	R08A2.5	F12F6.10	Y119D3B.11	ZK662.4	W09C2.1	NA	NA
B0495.4	F02H6.4	NA	NA	NA	NA	NA	NA	ZC247.2	C39E9.11	F19B10.10	F49C12.9	T18D3.1	T23B12.3	Y97E10AR.3	NA	NA	H27D07.6	K10D3.4	K12G11.3	F13D2.1	F09C12.1	C29F3.3	C28G1.6	F25D1.2	F31A9.4	K02F2.6	ZK792.6	NA	T24A6.8	NA	NA	NA	F25B5.6	F07G6.7	F58H1.1	C52E12.3	NA	NA	NA	NA	NA	NA	R08B4.2	F13A2.1	Y119D3B.15	ZK892.7	W09D6.1	NA	NA
B0495.5	F07A5.1	NA	NA	NA	NA	NA	NA	ZC250.3	C39E9.13	F19B10.2	F49E8.4	T19C3.1	T23F6.3	ZC168.3	NA	NA	H34I24.1	K10D6.2	LLC1.2	F13E6.2	F09C12.2	C29F3.4	C28H8.5	F25E5.7	F31D5.6	K02F3.1	ZK858.7	NA	T24B8.6	NA	NA	NA	F25E5.13	F08A10.1	F59A3.5	C52E4.3	NA	NA	NA	NA	NA	NA	R08C7.4	F13A2.2	Y13C8A.1	ZK899.6	Y102A5A.1	NA	NA
B0495.6	F07H5.10	NA	NA	NA	NA	NA	NA	ZC449.2	C39E9.14	F19B10.9	F52B5.5	T19C3.5	T23G5.1	ZC302.2	NA	NA	H37A05.4	K10G9.1	M01A8.1	F13E6.6	F09C3.1	C29F3.5	C28H8.6	F25E5.8	F31E8.4	K02F3.12	ZK930.3	NA	T24D1.1	NA	NA	NA	F25E5.8	F08B1.3	F59A3.6	C52E4.4	NA	NA	NA	NA	NA	NA	R09G11.1	F13A7.11	Y17G7B.17	NA	Y105C5A.1	NA	NA
B0495.7	F08B4.6	NA	NA	NA	NA	NA	NA	ZC513.5	C40H1.1	F19B6.1	F52B5.7	T19H12.9	T23H2.3	ZC328.4	NA	NA	H42K12.1	K11C4.2	M01D7.4	F13H6.5	F09E8.6	C29F3.7	C29F3.2	F25H5.1	F31E9.6	K02F3.2	ZK993.1	NA	T24F1.3	NA	NA	NA	F25H2.12	F08B12.3	F59A7.11	C52E4.6	NA	NA	NA	NA	NA	NA	R09H10.2	F13B12.5	Y18H1A.6	NA	Y105C5B.13	NA	NA
B0495.8	F08F3.2	NA	NA	NA	NA	NA	NA	ZK1010.7	C41C4.4	F19B6.2	F52C6.2	T20B12.2	T24A6.20	ZC334.3	NA	NA	K02A4.1	K11D12.10	M01H9.1	F13H8.4	F09E8.7	C29F4.1	C29F3.3	F25H5.3	F32A5.6	K02G10.1	NA	NA	T25D1.1	NA	NA	NA	F25H5.3	F08B6.4	F59C12.2	C53D5.4	NA	NA	NA	NA	NA	NA	R102.9	F13C5.3	Y18H1A.7	NA	Y106G6D.1	NA	NA
B0495.9	F08F3.9	NA	NA	NA	NA	NA	NA	ZK1248.15	C41C4.6	F19F10.1	F52C6.8	T20B12.6	T24B8.2	ZK1010.3	NA	NA	K02D3.1	K12B6.9	M01H9.2	F14B6.5	F09F7.1	C29F4.2	C29F3.5	F25H8.7	F32A6.3	K02G10.6	NA	NA	T25D10.2	NA	NA	NA	F25H9.5	F08G12.5	F59D12.3	C53D6.4	NA	NA	NA	NA	NA	NA	R11A8.3	F13C5.6	Y32F6A.1	NA	Y106G6D.2	NA	NA
B0496.1	F08G5.1	NA	NA	NA	NA	NA	NA	ZK1320.3	C41C4.7	F19F10.12	F52D2.2	T20F5.3	T24C12.3	ZK1127.5	NA	NA	K02E7.9	M01E11.7	M03B6.3	F14B8.5	F09F9.2	C29F4.3	C29F3.7	F25H9.3	F32A6.4	K03D10.1	NA	NA	T25G12.11	NA	NA	NA	F26A1.15	F08G5.3	F59E11.2	C54C6.6	NA	NA	NA	NA	NA	NA	R11D1.11	F13D12.8	Y32H12A.4	NA	Y106G6D.7	NA	NA
B0496.11	F09E5.13	NA	NA	NA	NA	NA	NA	ZK1321.3	C41D11.5	F19F10.5	F52D2.4	T20F7.7	T24C2.3	ZK1248.19	NA	NA	K02F2.3	M01H9.2	M04C9.5	F14B8.7	F09G2.3	C29F5.1	C29F4.1	F26A1.7	F32B4.4	K04B12.2	NA	NA	T26C5.1	NA	NA	NA	F26D12.1	F09A5.4	F59E11.7	C54G4.6	NA	NA	NA	NA	NA	NA	R11G1.4	F13E6.2	Y34D9A.3	NA	Y106G6H.15	NA	NA
B0496.2	F09E5.15	NA	NA	NA	NA	NA	NA	ZK287.1	C41G7.1	F19F10.6	F52D2.6	T20G5.4	T24C4.1	ZK1307.1	NA	NA	K02F2.6	M02H5.4	M117.1	F14D12.1	F09G2.5	C29F5.2	C29F4.2	F26D10.3	F32B6.9	K04C2.2	NA	NA	T27A1.5	NA	NA	NA	F26F4.9	F09B12.7	F59E12.6	C54G6.1	NA	NA	NA	NA	NA	NA	R11G11.2	F13E6.6	Y34D9A.7	NA	Y110A7A.1	NA	NA
B0496.3	F09E8.3	NA	NA	NA	NA	NA	NA	ZK353.7	C41G7.2	F19H6.4	F52D2.7	T21G5.3	T25D1.3	ZK131.5	NA	NA	K02F3.1	M02H5.5	M153.5	F14D12.4	F09G8.10	C29F5.4	C29F4.3	F26E4.11	F32E10.6	K04G2.10	NA	NA	T27A8.1	NA	NA	NA	F26H9.2	F09C12.2	F59F3.4	C54H2.1	NA	NA	NA	NA	NA	NA	R12B2.6	F13H10.2	Y37D8A.4	NA	Y110A7A.9	NA	NA
B0496.5	F09G2.2	NA	NA	NA	NA	NA	NA	ZK6.6	C41G7.3	F20A1.9	F52D2.8	T22C8.4	T25E12.6	ZK131.9	NA	NA	K02F6.9	M04C3.1	M28.8	F14F11.1	F09G8.5	C29F9.2	C29F5.2	F26F12.5	F32H2.2	K04G2.7	NA	NA	T27B1.2	NA	NA	NA	F27B3.2	F09C6.11	H02K04.2	C54H2.3	NA	NA	NA	NA	NA	NA	R12E2.4	F13H10.6	Y37E11AM.1	NA	Y111B2A.27	NA	NA
B0496.6	F09G8.7	NA	NA	NA	NA	NA	NA	ZK616.10	C41G7.4	F20B6.9	F52G2.2	T22H6.2	T25G12.5	ZK1321.3	NA	NA	K03A11.1	M04C9.5	M6.4	F15A2.6	F10C1.7	C29F9.3	C29F5.4	F26F2.1	F33C8.1	K04G2.8	NA	NA	T27B7.6	NA	NA	NA	F27B3.5	F09D12.1	H03A11.2	C55A6.1	NA	NA	NA	NA	NA	NA	R12E2.5	F13H10.9	Y37E3.15	NA	Y113G7B.23	NA	NA
B0496.7	F10B5.8	NA	NA	NA	NA	NA	NA	ZK616.9	C41H7.3	F20D12.1	F52G3.4	T23B3.1	T26A5.1	ZK185.2	NA	NA	K03B8.11	M153.5	R01H10.3	F15A8.6	F10C2.3	C29F9.4	C29F9.2	F26G1.6	F33E2.5	K04H4.6	NA	NA	T27F7.2	NA	NA	NA	F27B3.7	F09E10.7	H09F14.1	C55B6.1	NA	NA	NA	NA	NA	NA	R12E2.8	F13H6.1	Y37E3.4	NA	Y116A8C.42	NA	NA
B0496.8	F10C2.2	NA	NA	NA	NA	NA	NA	ZK632.4	C42C1.11	F20D12.4	F52H2.5	T23G5.2	T26E3.8	ZK20.6	NA	NA	K03B8.14	M28.7	R01H10.6	F15B9.8	F10D11.6	C29G2.5	C29F9.3	F27C1.11	F33H2.3	K05C4.9	NA	NA	T28A11.15	NA	NA	NA	F27C1.2	F09G2.3	H12I19.4	C55B7.11	NA	NA	NA	NA	NA	NA	R148.1	F13H8.4	Y37H2A.5	NA	Y116F11A.1	NA	NA
B0507.1	F10C2.3	NA	NA	NA	NA	NA	NA	ZK678.8	C42C1.13	F20D6.4	F53A2.6	T24C12.3	T26H2.4	ZK418.4	NA	NA	K04C2.6	R03G8.3	R02F11.3	F15E6.2	F10F2.2	C29G2.6	C29F9.9	F27C1.13	F33H2.7	K05F1.5	NA	NA	T28A11.22	NA	NA	NA	F27C8.3	F09G2.6	H13N06.3	C55B7.5	NA	NA	NA	NA	NA	NA	R17.3	F13H8.5	Y38C1AA.12	NA	Y11D7A.12	NA	NA
B0507.10	F10D11.1	NA	NA	NA	NA	NA	NA	ZK836.1	C42C1.15	F21C3.3	F53B3.1	T24C4.6	T27A8.2	ZK418.5	NA	NA	K05F6.1	R03G8.6	R03G5.6	F15G9.1	F10F2.3	C29H12.3	C29G2.3	F28A10.1	F35E12.2	K06A5.4	NA	NA	T28B8.1	NA	NA	NA	F28F8.1	F09G8.2	H19N07.3	C55C3.5	NA	NA	NA	NA	NA	NA	R173.1	F14B6.2	Y38C1AA.2	NA	Y11D7A.13	NA	NA
B0507.2	F10D11.2	NA	NA	NA	NA	NA	NA	ZK938.2	C42C1.8	F21C3.4	F53C3.11	T24E12.13	T27E9.2	ZK430.7	NA	NA	K05F6.12	R04B3.1	R03G8.6	F15G9.5	F10F2.4	C30A5.10	C29G2.5	F28B4.3	F35E2.2	K06C4.11	NA	NA	T28C12.4	NA	NA	NA	F28H7.1	F10A3.8	H37A05.2	C56A3.4	NA	NA	NA	NA	NA	NA	R186.8	F14B6.4	Y38C9A.2	NA	Y18D10A.3	NA	NA
B0507.3	F10E9.5	NA	NA	NA	NA	NA	NA	NA	C43E11.11	F21C3.5	F53C3.2	T24E12.5	T28C6.10	ZK507.6	NA	NA	K05F6.2	R05D3.6	R03H4.1	F15H10.7	F10F2.9	C30B5.5	C29G2.6	F28E10.1	F35G2.3	K06C4.12	NA	NA	T28F12.2	NA	NA	NA	F28H7.10	F10C1.8	K01A6.6	C56A3.5	NA	NA	NA	NA	NA	NA	R53.2	F14B8.6	Y39A1A.1	NA	Y20C6A.4	NA	NA
B0507.6	F10E9.7	NA	NA	NA	NA	NA	NA	NA	C43E11.12	F21D5.1	F53F8.3	T25D1.3	T28F2.4	ZK546.13	NA	NA	K05F6.3	R05D7.5	R04B5.6	F16B12.1	F10G8.2	C30B5.7	C29H12.3	F28E10.4	F35H10.1	K06C4.4	NA	NA	T28F4.1	NA	NA	NA	F28H7.11	F10C2.7	K01A6.7	C56C10.7	NA	NA	NA	NA	NA	NA	T01D3.2	F14D12.1	Y39A1A.13	NA	Y23H5B.7	NA	NA
B0507.7	F10G2.2	NA	NA	NA	NA	NA	NA	NA	C43E11.2	F21D5.2	F53G2.2	T26A5.8	T28H11.4	ZK616.4	NA	NA	K05F6.4	R06A10.4	R04E5.7	F16B3.1	F11A1.3	C30B5.9	C30A5.10	F28H1.2	F35H10.11	K07C5.13	NA	NA	T28H10.3	NA	NA	NA	F29C12.4	F10D2.11	K02A6.3	C56C10.8	NA	NA	NA	NA	NA	NA	T01E8.1	F14E5.5	Y39A1A.16	NA	Y24D9A.2	NA	NA
B0507.8	F11A10.3	NA	NA	NA	NA	NA	NA	NA	C43E11.4	F21F3.3	F53H4.6	T26C11.5	W01A11.5	ZK622.3	NA	NA	K05F6.5	R07E5.17	R05D3.6	F16D3.7	F11A5.5	C30D11.1	C30B5.5	F28H1.4	F35H12.3	K07E3.2	NA	NA	W01C8.4	NA	NA	NA	F29G9.6	F10D2.5	K02D10.1	C56G2.7	NA	NA	NA	NA	NA	NA	T01E8.8	F14F7.3	Y39A1A.8	NA	Y27F2A.8	NA	NA
B0507.9	F11A10.5	NA	NA	NA	NA	NA	NA	NA	C43G2.1	F21F3.6	F54A5.1	T26C11.6	W02B8.2	ZK930.3	NA	NA	K05F6.6	R07G3.8	R05G9R.1	F16H11.1	F11A5.8	C30F12.1	C30B5.6	F29C12.1	F36A2.2	K07E3.3	NA	NA	W01F3.1	NA	NA	NA	F31B12.1	F10D2.6	K02E10.7	C56G7.1	NA	NA	NA	NA	NA	NA	T02B5.2	F14F9.4	Y39A1C.4	NA	Y32F6A.3	NA	NA
B0511.1	F11A10.8	NA	NA	NA	NA	NA	NA	NA	C44B7.10	F21H12.6	F54C4.4	T26C11.7	W03G1.6	ZK938.2	NA	NA	K05F6.7	R08C7.1	R05H5.2	F17A9.3	F11C3.2	C30F12.6	C30D11.1	F29D10.4	F36A2.3	K07E3.4	NA	NA	W02B12.11	NA	NA	NA	F31B12.3	F10E7.3	K02F2.5	CD4.4	NA	NA	NA	NA	NA	NA	T02G5.1	F14H12.1	Y39A3CL.7	NA	Y32H12A.3	NA	NA
B0511.10	F11G11.2	NA	NA	NA	NA	NA	NA	NA	C44B7.12	F22D6.1	F54D1.4	T26C11.9	W03G9.8	NA	NA	NA	K05F6.8	R09E10.5	R05H5.7	F17C8.1	F11C7.1	C30F12.7	C30F12.1	F29G6.3	F36A4.8	K08A8.3	NA	NA	W02B12.9	NA	NA	NA	F31B12.4	F10F2.4	K02G10.4	CD4.6	NA	NA	NA	NA	NA	NA	T02G5.3	F15B9.11	Y39A3CR.1	NA	Y37E11B.6	NA	NA
B0511.11	F11G11.5	NA	NA	NA	NA	NA	NA	NA	C44B9.4	F22D6.2	F54D10.1	T26H2.1	W04A8.3	NA	NA	NA	K05F6.9	R09F10.5	R06A10.1	F17E5.1	F11H8.2	C30F2.1	C30F12.5	F30A10.14	F36G3.2	K08B12.3	NA	NA	W02D9.2	NA	NA	NA	F31B9.1	F10G7.11	K03B8.9	CD4.7	NA	NA	NA	NA	NA	NA	T03D8.4	F15C11.1	Y39B6A.3	NA	Y38E10A.28	NA	NA
B0511.12	F13A7.10	NA	NA	NA	NA	NA	NA	NA	C44B9.5	F22D6.6	F54E7.5	T26H2.3	W04A8.5	NA	NA	NA	K06G5.2	R10H10.2	R06A10.2	F18A11.5	F13A2.10	C30F2.4	C30F12.6	F30A10.3	F36H5.4	K08B4.4	NA	NA	W02D9.4	NA	NA	NA	F31D5.3	F11A5.15	K04D7.6	D1007.16	NA	NA	NA	NA	NA	NA	T03D8.6	F15D4.3	Y39B6A.36	NA	Y38H6C.10	NA	NA
B0511.13	F13B12.6	NA	NA	NA	NA	NA	NA	NA	C44E4.3	F22E5.9	F54F7.6	T26H2.4	W04E12.2	NA	NA	NA	K07A1.12	R10H10.5	R07E3.3	F18C12.1	F13A2.2	C30F2.5	C30F12.7	F30B5.4	F36H5.8	K08C7.3	NA	NA	W06H8.1	NA	NA	NA	F31F4.12	F12A10.8	K04F1.9	D1007.4	NA	NA	NA	NA	NA	NA	T04B2.3	F15D4.5	Y39B6A.37	NA	Y39G10AL.1	NA	NA
B0511.2	F13D12.5	NA	NA	NA	NA	NA	NA	NA	C44E4.5	F22F7.7	F54H12.5	T26H2.5	W06A11.2	NA	NA	NA	K07F5.12	R11F4.3	R07E3.6	F18C5.4	F13A7.12	C30F8.2	C30F2.1	F30B5.7	F37B1.5	K08D10.10	NA	NA	W06H8.6	NA	NA	NA	F31F4.16	F12A10.9	K04G7.3	D1007.5	NA	NA	NA	NA	NA	NA	T04C9.2	F15D4.6	Y39B6A.43	NA	Y39G10AL.3	NA	NA
B0511.3	F13E9.1	NA	NA	NA	NA	NA	NA	NA	C44F1.3	F22G12.5	F55A3.3	T27A10.3	W08E3.4	NA	NA	NA	K07F5.13	R12C12.5	R07G3.8	F18C5.5	F13B12.5	C30G12.2	C30F2.2	F31B12.1	F37B4.10	K08F8.6	NA	NA	W07G1.3	NA	NA	NA	F31F4.8	F12E12.11	K04H4.7	D1007.8	NA	NA	NA	NA	NA	NA	T04F8.6	F15E6.2	Y40B1B.5	NA	Y39G10AR.10	NA	NA
B0511.4	F13G3.4	NA	NA	NA	NA	NA	NA	NA	C44H9.4	F22H10.5	F55A8.1	T28C6.4	W08F4.12	NA	NA	NA	K08D10.13	R12C12.9	R08B4.1	F18E3.11	F13B6.1	C30G4.5	C30F2.3	F31B12.3	F37C4.6	K08H2.1	NA	NA	Y102A11A.6	NA	NA	NA	F31F4.9	F13B12.2	K05D4.4	D1014.3	NA	NA	NA	NA	NA	NA	T04H1.1	F15E6.5	Y41D4B.19	NA	Y43B11AL.1	NA	NA
B0511.5	F13H10.4	NA	NA	NA	NA	NA	NA	NA	C45G9.2	F23B12.5	F55C5.10	T28H11.4	W08F4.13	NA	NA	NA	K08D10.8	R12E2.4	R08C7.1	F18E3.12	F13B6.3	C30G7.2	C30F2.4	F31D5.3	F37H8.2	K08H2.4	NA	NA	Y105E8A.20	NA	NA	NA	F32A5.4	F13C5.1	K06A4.1	D1014.4	NA	NA	NA	NA	NA	NA	T05B11.7	F15E6.9	Y41E3.4	NA	Y45G5AM.4	NA	NA
B0511.6	F14B4.2	NA	NA	NA	NA	NA	NA	NA	C45H4.14	F23B2.13	F55C9.1	VC5.5	W09C2.3	NA	NA	NA	K08E3.8	R12E2.5	R08C7.12	F18E3.4	F13D12.9	C30H6.10	C30F2.5	F31D5.5	F37H8.5	K08H2.6	NA	NA	Y105E8A.23	NA	NA	NA	F32A7.7	F13D11.3	K06B4.12	D1022.7	NA	NA	NA	NA	NA	NA	T05C3.6	F15G9.4	Y41E3.9	NA	Y45G5AM.5	NA	NA
B0511.7	F14D2.1	NA	NA	NA	NA	NA	NA	NA	C46A5.5	F23B2.6	F55C9.10	VH15N14R.1	W09G12.1	NA	NA	NA	K08E7.1	R13H4.1	R08E3.2	F18E9.1	F13E6.2	C30H6.12	C30F8.2	F31E9.2	F38A5.7	K08H2.8	NA	NA	Y105E8A.3	NA	NA	NA	F32B5.6	F13D2.2	K06C4.8	D1037.1	NA	NA	NA	NA	NA	NA	T05D4.4	F15G9.5	Y43D4A.6	NA	Y45G5AM.7	NA	NA
B0511.8	F14D2.12	NA	NA	NA	NA	NA	NA	NA	C46A5.6	F23C8.8	F55C9.13	VM106R.1	W09G12.4	NA	NA	NA	K08H2.2	R13H4.5	R09B5.11	F18F11.3	F13E6.6	C30H6.5	C30G12.2	F31F7.1	F38A6.1	K09A11.1	NA	NA	Y111B2A.20	NA	NA	NA	F32B5.7	F13D2.3	K07C5.5	D1043.1	NA	NA	NA	NA	NA	NA	T06C12.13	F15H10.8	Y43F4B.4	NA	Y46E12A.4	NA	NA
B0511.9	F14D2.13	NA	NA	NA	NA	NA	NA	NA	C46C2.7	F23D12.10	F55C9.14	W01A11.5	W10C6.1	NA	NA	NA	K09C4.8	R53.3	R09F10.5	F18G5.2	F13G3.8	C31A11.5	C30G4.4	F32A5.2	F38B2.4	K09A9.1	NA	NA	Y111B2A.4	NA	NA	NA	F32H5.4	F13G3.12	K07E3.7	D1044.6	NA	NA	NA	NA	NA	NA	T06C12.7	F16B3.1	Y43H11AL.1	NA	Y46G5A.4	NA	NA
B0513.1	F14D2.15	NA	NA	NA	NA	NA	NA	NA	C46E10.8	F23F1.5	F55C9.7	W02D3.11	W10D9.1	NA	NA	NA	K09F5.5	R57.2	R105.1	F18G5.4	F13H6.1	C31C9.6	C30G4.5	F32B5.6	F38E9.1	K09B11.9	NA	NA	Y111B2A.8	NA	NA	NA	F33A8.9	F13G3.2	K07G5.5	D1046.2	NA	NA	NA	NA	NA	NA	T06E4.10	F16B3.2	Y43H11AL.2	NA	Y46H3C.5	NA	NA
B0513.2	F14D2.2	NA	NA	NA	NA	NA	NA	NA	C46F11.2	F23F1.8	F55G1.4	W02D3.9	Y105C5A.10	NA	NA	NA	K10C9.6	R90.1	R10H10.3	F19C7.1	F13H8.5	C31H2.3	C30G7.2	F32B5.7	F38H4.2	K09C4.8	NA	NA	Y113G7A.6	NA	NA	NA	F33D4.2	F13H6.5	K08B12.2	D1054.2	NA	NA	NA	NA	NA	NA	T06E4.14	F16B3.3	Y46G5A.28	NA	Y46H3C.7	NA	NA
B0513.3	F14D2.4	NA	NA	NA	NA	NA	NA	NA	C46F11.3	F23F12.4	F55G7.2	W02D9.4	Y105C5B.9	NA	NA	NA	K10C9.7	T01B10.4	R11F4.3	F19C7.8	F14B6.2	C31H5.1	C30H6.10	F32D8.7	F38H4.5	K09F6.8	NA	NA	Y113G7B.11	NA	NA	NA	F34D10.6	F14B8.1	K08B12.3	D1054.3	NA	NA	NA	NA	NA	NA	T06E4.7	F16C3.3	Y47D3A.28	NA	Y47D7A.1	NA	NA
B0513.4	F14D7.2	NA	NA	NA	NA	NA	NA	NA	C46F4.1	F23F12.6	F56A11.4	W03D2.1	Y105E8B.5	NA	NA	NA	K10D6.4	T01B10.5	R11G1.6	F19F10.3	F14B6.4	C31H5.3	C30H6.12	F32D8.9	F39D8.2	K09H11.1	NA	NA	Y113G7B.16	NA	NA	NA	F35B12.10	F14D7.12	K08B5.1	D1081.9	NA	NA	NA	NA	NA	NA	T07C12.8	F16D3.1	Y47D3A.4	NA	Y47D7A.8	NA	NA
B0513.5	F15D3.6	NA	NA	NA	NA	NA	NA	NA	C47B2.1	F23H11.1	F56A4.12	W03D2.2	Y106G6H.2	NA	NA	NA	K10G4.10	T01B4.3	R12C12.10	F19H6.2	F14B6.5	C31H5.6	C30H6.5	F32G8.2	F39E9.1	K10B2.1	NA	NA	Y116A8C.25	NA	NA	NA	F35B12.8	F14D7.8	K08D10.10	D1086.4	NA	NA	NA	NA	NA	NA	T07D1.2	F16D3.7	Y47G6A.20	NA	Y47G6A.31	NA	NA
B0513.9	F15D4.3	NA	NA	NA	NA	NA	NA	NA	C47B2.2	F23H11.3	F56A6.4	W03D8.3	Y110A7A.1	NA	NA	NA	K10H10.3	T01B6.1	R13F6.3	F19H6.7	F14B8.7	C32A9.1	C31B8.8	F32H5.6	F39F10.4	K10B3.5	NA	NA	Y116A8C.26	NA	NA	NA	F35B3.7	F14F11.1	K08D10.9	D2005.3	NA	NA	NA	NA	NA	NA	T07F10.6	F16F9.1	Y47H9C.8	NA	Y47G6A.7	NA	NA
B0523.1	F15E6.1	NA	NA	NA	NA	NA	NA	NA	C47B2.4	F23H11.9	F56A8.4	W04A8.3	Y110A7A.13	NA	NA	NA	K11C4.4	T01D1.5	R151.5	F19H8.4	F14D12.4	C32C4.2	C31C9.6	F33A8.2	F39G3.7	K10C3.4	NA	NA	Y119D3B.18	NA	NA	NA	F35D11.11	F14F9.8	K08D8.7	D2005.5	NA	NA	NA	NA	NA	NA	T07G12.3	F16H11.4	Y48A6B.11	NA	Y47H10A.2	NA	NA
B0523.3	F15H10.3	NA	NA	NA	NA	NA	NA	NA	C47B2.5	F23H12.2	F56A8.8	W04A8.5	Y110A7A.14	NA	NA	NA	K11G12.4	T01D3.3	R31.3	F19H8.5	F14D12.6	C32E12.3	C31H2.3	F33A8.5	F40E10.6	K10C9.3	NA	NA	Y119D3B.20	NA	NA	NA	F35D6.1	F14H8.1	K08F4.12	D2007.4	NA	NA	NA	NA	NA	NA	T07H6.1	F16H11.5	Y48C3A.1	NA	Y47H9C.12	NA	NA
B0523.5	F16A11.1	NA	NA	NA	NA	NA	NA	NA	C47B2.6	F25B3.6	F56C3.6	W04A8.9	Y111B2A.27	NA	NA	NA	K12B6.8	T01D3.6	R57.2	F20A1.2	F14D7.11	C32E8.9	C31H5.3	F33D11.2	F40F4.1	K10G9.3	NA	NA	Y11D7A.19	NA	NA	NA	F35E12.2	F15A4.8	K08F4.9	D2013.2	NA	NA	NA	NA	NA	NA	T08A9.13	F17B5.2	Y48C3A.12	NA	Y48A6C.3	NA	NA
B0524.2	F16A11.2	NA	NA	NA	NA	NA	NA	NA	C47D12.6	F25B5.4	F56D5.5	W04E12.7	Y113G7B.17	NA	NA	NA	K12D12.1	T01D3.7	T01B6.1	F20A1.7	F14F11.1	C32H11.11	C31H5.6	F33D4.2	F40F4.3	K11E4.4	NA	NA	Y11D7A.3	NA	NA	NA	F35E2.1	F15A8.4	K08F8.3	D2024.5	NA	NA	NA	NA	NA	NA	T08B2.2	F17E9.8	Y48E1C.1	NA	Y48G1C.6	NA	NA
B0524.5	F16H11.3	NA	NA	NA	NA	NA	NA	NA	C47D12.8	F25D7.2	F56F4.1	W04G3.5	Y113G7B.4	NA	NA	NA	K12H6.1	T01E8.3	T01C3.4	F20B6.2	F14F9.2	C32H11.12	C32C4.2	F33E2.2	F40F4.7	K12F2.2	NA	NA	Y15E3A.5	NA	NA	NA	F35F10.7	F15B10.1	K08H10.1	D2030.1	NA	NA	NA	NA	NA	NA	T08G11.5	F18A11.5	Y48G10A.4	NA	Y48G9A.12	NA	NA
B0524.6	F18A1.6	NA	NA	NA	NA	NA	NA	NA	C47E12.2	F25D7.4	F56F4.8	W08F4.13	Y116A8C.35	NA	NA	NA	K12H6.11	T01G5.1	T01C4.2	F20B6.3	F14H12.1	C32H11.3	C32E12.3	F33H12.4	F40G12.4	K12H4.3	NA	NA	Y16B4A.1	NA	NA	NA	F35G8.1	F15B9.10	K09C4.10	D2030.3	NA	NA	NA	NA	NA	NA	T09A5.2	F18E9.1	Y48G8AL.5	NA	Y49E10.6	NA	NA
B0545.1	F18A1.7	NA	NA	NA	NA	NA	NA	NA	C47E12.3	F25F2.1	F56G4.2	W08F4.2	Y116F11A.1	NA	NA	NA	K12H6.7	T01H10.2	T01D3.6	F20D12.3	F15A4.5	C32H11.4	C32E8.6	F34D10.4	F40G9.19	K12H6.7	NA	NA	Y17D7C.1	NA	NA	NA	F35H10.3	F15B9.3	K09C8.1	D2030.6	NA	NA	NA	NA	NA	NA	T09A5.3	F18E9.3	Y48G8AL.7	NA	Y49F6B.7	NA	NA
B0545.3	F18A1.8	NA	NA	NA	NA	NA	NA	NA	C47E12.5	F25H2.4	F56G4.3	W08G11.3	Y119C1B.8	NA	NA	NA	M01D1.1	T02G5.2	T01E8.3	F20D12.6	F15A8.5	C32H11.5	C32F10.4	F34D10.5	F40G9.5	M01D1.9	NA	NA	Y17G9B.8	NA	NA	NA	F36A2.2	F15B9.6	K09C8.6	D2030.7	NA	NA	NA	NA	NA	NA	T09B4.4	F18F11.1	Y49E10.21	NA	Y50D4B.2	NA	NA
B0545.4	F18A11.1	NA	NA	NA	NA	NA	NA	NA	C47E8.4	F25H2.6	F57B10.4	W09C2.3	Y20C6A.4	NA	NA	NA	M01D1.10	T03F7.3	T01H10.2	F20D6.10	F15A8.6	C32H11.8	C32H11.12	F34D10.6	F40G9.6	M01E11.1	NA	NA	Y17G9B.9	NA	NA	NA	F36D3.9	F15B9.9	K09E2.2	D2030.8	NA	NA	NA	NA	NA	NA	T10B5.4	F18G5.1	Y49E10.4	NA	Y51H4A.15	NA	NA
B0546.1	F18C5.2	NA	NA	NA	NA	NA	NA	NA	C47E8.8	F25H2.9	F57C2.2	W09G12.1	Y23H5B.1	NA	NA	NA	M01D1.3	T03G11.8	T02B11.6	F20D6.2	F15E6.2	C33A12.11	C32H11.3	F34D6.5	F42A10.9	M02A10.3	NA	NA	Y18D10A.16	NA	NA	NA	F36F2.2	F15D3.2	K09E2.3	D2063.3	NA	NA	NA	NA	NA	NA	T10E10.4	F19B10.13	Y49F6A.1	NA	Y53F4B.14	NA	NA
B0546.2	F19B10.5	NA	NA	NA	NA	NA	NA	NA	C48A7.2	F25H9.6	F57C2.3	W09G12.4	Y27F2A.8	NA	NA	NA	M01D1.7	T04B8.1	T02C12.1	F20G4.2	F15E6.3	C33A12.19	C32H11.4	F34H10.2	F42A6.2	M02E1.2	NA	NA	Y18D10A.20	NA	NA	NA	F36G3.3	F15D3.8	K09G1.4	D2096.2	NA	NA	NA	NA	NA	NA	T10G3.5	F19C6.1	Y49F6B.4	NA	Y53F4B.24	NA	NA
B0546.3	F19D8.2	NA	NA	NA	NA	NA	NA	NA	C48B4.10	F26A1.10	F57C9.4	Y102A5C.19	Y34D9A.4	NA	NA	NA	M01D1.8	T04F8.4	T02G5.2	F21A3.7	F15E6.5	C33A12.2	C32H11.5	F35A5.1	F42A6.8	M03B6.4	NA	NA	Y22D7AL.5	NA	NA	NA	F36H12.2	F15E6.3	K09H9.6	DC2.3	NA	NA	NA	NA	NA	NA	T12A2.1	F19C7.8	Y49F6B.5	NA	Y53F4B.26	NA	NA
B0546.4	F19F10.11	NA	NA	NA	NA	NA	NA	NA	C48B4.11	F26A1.2	F57F4.1	Y105C5A.1	Y37A1B.5	NA	NA	NA	M01D7.9	T04F8.9	T03D8.3	F21C10.3	F15E6.9	C33B4.5	C33A12.11	F35B12.3	F42A9.2	M04B2.1	NA	NA	Y23H5B.5	NA	NA	NA	F36H2.5	F15H10.10	K11D12.3	DY3.1	NA	NA	NA	NA	NA	NA	T13C2.3	F19G12.11	Y50D4A.2	NA	Y53F4B.43	NA	NA
B0547.1	F20A1.2	NA	NA	NA	NA	NA	NA	NA	C48B4.6	F26A3.7	F57F4.2	Y105C5A.11	Y37E11AR.5	NA	NA	NA	M01E5.6	T04H1.1	T03G11.3	F21D12.1	F15G9.3	C33D12.3	C33A12.13	F35B12.4	F42F12.4	M04B2.4	NA	NA	Y25C1A.7	NA	NA	NA	F36H5.1	F15H10.12	K11G12.1	DY3.4	NA	NA	NA	NA	NA	NA	T13H10.2	F20B4.6	Y50D7A.11	NA	Y53F4B.7	NA	NA
B0554.1	F20C5.3	NA	NA	NA	NA	NA	NA	NA	C48B4.7	F26D2.16	F57F5.4	Y105C5B.13	Y37H2A.4	NA	NA	NA	M03F8.3	T04H1.8	T03G6.1	F21D5.3	F15G9.4	C33D9.10	C33A12.14	F35C11.3	F42G2.6	M04B2.5	NA	NA	Y32H12A.6	NA	NA	NA	F36H5.2	F15H10.5	K11G12.4	DY3.7	NA	NA	NA	NA	NA	NA	T13H5.2	F20D1.6	Y50D7A.2	NA	Y53G8AR.9	NA	NA
B0554.5	F20D12.1	NA	NA	NA	NA	NA	NA	NA	C48B4.8	F26D2.2	F57G9.3	Y106G6D.1	Y39A1A.12	NA	NA	NA	M04B2.1	T05C12.10	T03G6.2	F21D9.4	F15G9.5	C33G3.3	C33A12.19	F35C5.10	F42G4.2	M05B5.5	NA	NA	Y37A1A.3	NA	NA	NA	F36H9.6	F16B12.8	K11G9.2	DY3.8	NA	NA	NA	NA	NA	NA	T13H5.3	F20D12.6	Y50E8A.11	NA	Y54E10A.15	NA	NA
B0554.6	F20D6.4	NA	NA	NA	NA	NA	NA	NA	C48B4.9	F26D2.7	F58A4.10	Y106G6D.2	Y39A1A.14	NA	NA	NA	M04B2.5	T05C12.4	T04H1.8	F21E9.2	F15H10.7	C33G8.11	C33A12.2	F35D11.8	F42G8.7	M116.1	NA	NA	Y38C1AA.4	NA	NA	NA	F37B1.4	F16B4.5	K11G9.5	E_BE45912.2	NA	NA	NA	NA	NA	NA	T14A8.1	F20G4.2	Y51A2D.7	NA	Y54E5A.4	NA	NA
B0554.7	F20G4.3	NA	NA	NA	NA	NA	NA	NA	C48B6.3	F26D2.9	F58D2.1	Y106G6H.5	Y39G10AL.1	NA	NA	NA	M05B5.4	T05E12.9	T05A8.3	F21F3.5	F15H10.8	C33G8.4	C33A12.4	F35E12.10	F42G8.9	M116.4	NA	NA	Y38C1AA.8	NA	NA	NA	F38B6.4	F16B4.7	K12G11.2	E01A2.1	NA	NA	NA	NA	NA	NA	T15B12.1	F21A10.1	Y51F10.5	NA	Y54E5A.5	NA	NA
B0563.1	F20H11.3	NA	NA	NA	NA	NA	NA	NA	C48D1.2	F26E4.1	F58D2.2	Y113G7B.2	Y39G10AR.10	NA	NA	NA	M110.4	T05G5.2	T05A8.4	F21H7.10	F16B12.1	C33G8.5	C33B4.4	F35E8.9	F42G9.2	M142.4	NA	NA	Y39A1C.2	NA	NA	NA	F38E1.5	F16B4.9	K12H6.3	E01A2.4	NA	NA	NA	NA	NA	NA	T15H9.3	F21A3.7	Y51H1A.2	NA	Y54F10BM.9	NA	NA
B0563.10	F21A3.5	NA	NA	NA	NA	NA	NA	NA	C48E7.2	F26E4.8	F58D5.9	Y116F11A.1	Y39G10AR.13	NA	NA	NA	M116.1	T06A1.5	T05A8.5	F21H7.5	F16B3.1	C33H5.14	C33C12.3	F35F10.10	F43C11.10	M142.5	NA	NA	Y39A1C.4	NA	NA	NA	F38E11.1	F16C3.1	M01B2.1	E01A2.5	NA	NA	NA	NA	NA	NA	T17A3.2	F21D5.8	Y52B11A.9	NA	Y55B1BR.3	NA	NA
B0563.2	F21C3.4	NA	NA	NA	NA	NA	NA	NA	C49A9.10	F26F2.7	F58E1.10	Y17G7B.5	Y39H10A.7	NA	NA	NA	M116.4	T06D8.3	T05C1.3	F21H7.9	F16B3.2	C34B4.3	C33D12.3	F35H10.10	F43C11.4	M163.1	NA	NA	Y39E4B.6	NA	NA	NA	F38E11.2	F16C3.2	M01B2.2	E01A2.6	NA	NA	NA	NA	NA	NA	T17H7.7	F21D9.4	Y53G8AR.2	NA	Y55F3AM.4	NA	NA
B0563.4	F21D5.1	NA	NA	NA	NA	NA	NA	NA	C49C3.6	F26F4.10	F58E1.11	Y19D10A.16	Y40B10A.6	NA	NA	NA	M117.4	T07C12.9	T05C12.10	F22A3.1	F16D3.1	C34B7.1	C33D9.10	F35H8.1	F43C11.9	M163.3	NA	NA	Y41D4B.10	NA	NA	NA	F39B2.10	F16H6.2	M01B2.9	E01B7.1	NA	NA	NA	NA	NA	NA	T18H9.5	F21F3.5	Y53G8AR.3	NA	Y57A10C.1	NA	NA
B0563.5	F21F3.3	NA	NA	NA	NA	NA	NA	NA	C49C3.7	F26F4.11	F58E1.12	Y20C6A.4	Y42H9AR.2	NA	NA	NA	M151.1	T07D1.2	T05C3.6	F22A3.3	F16D3.7	C34C12.7	C33G3.3	F35H8.4	F44A2.7	M7.5	NA	NA	Y41D4B.26	NA	NA	NA	F39G3.8	F16H6.7	M02D8.5	E01G4.4	NA	NA	NA	NA	NA	NA	T19B10.3	F21G4.3	Y53G8AR.6	NA	Y57G7A.2	NA	NA
B0563.6	F21F3.4	NA	NA	NA	NA	NA	NA	NA	C49C8.3	F26F4.12	F58E1.13	Y24F12A.3	Y43B11AL.1	NA	NA	NA	M151.5	T07D4.1	T05D4.3	F22B7.1	F16F9.5	C34C6.3	C33G8.11	F36D1.12	F44A6.2	M88.6	NA	NA	Y42H9B.2	NA	NA	NA	F40A3.7	F17A2.7	M02H5.4	E02H1.2	NA	NA	NA	NA	NA	NA	T19D12.6	F21H12.7	Y53H1C.1	NA	Y61A9LA.9	NA	NA
B0563.7	F21F3.6	NA	NA	NA	NA	NA	NA	NA	C49F5.3	F26F4.5	F58E1.14	Y26E6A.3	Y43F8C.13	NA	NA	NA	M151.6	T07F8.2	T05E12.9	F22D6.1	F16G10.11	C34C6.7	C33G8.4	F36G3.3	F44B9.10	R02D3.1	NA	NA	Y43D4A.5	NA	NA	NA	F40B1.1	F17A2.9	M02H5.5	E02H1.5	NA	NA	NA	NA	NA	NA	T19D7.3	F22A3.1	Y54E10A.14	NA	Y62H9A.15	NA	NA
B0563.8	F21F3.7	NA	NA	NA	NA	NA	NA	NA	C49F5.6	F26G5.1	F58E1.5	Y27F2A.6	Y45G5AM.4	NA	NA	NA	M151.8	T07H8.6	T06C12.13	F22E5.1	F16G10.3	C34D1.1	C33G8.5	F36H1.4	F44B9.3	R02D5.1	NA	NA	Y43E12A.2	NA	NA	NA	F40D4.13	F17B5.4	M03C11.5	E02H1.8	NA	NA	NA	NA	NA	NA	T19D7.7	F22A3.3	Y54E10BR.6	NA	Y63D3A.10	NA	NA
B0563.9	F21G4.2	NA	NA	NA	NA	NA	NA	NA	C49H3.10	F26H11.4	F58E10.2	Y27F2A.8	Y46B2A.1	NA	NA	NA	M153.1	T08H4.1	T06C12.2	F22F4.1	F16G10.9	C34D1.3	C33H5.13	F37A4.7	F44C4.5	R02F2.7	NA	NA	Y43F4A.1	NA	NA	NA	F40F12.5	F17C8.2	M03D4.6	E02H4.6	NA	NA	NA	NA	NA	NA	T19E7.6	F22B7.1	Y54F10BM.1	NA	Y63D3A.2	NA	NA
B0564.1	F21H12.5	NA	NA	NA	NA	NA	NA	NA	C50A2.2	F27B3.6	F58E10.5	Y37D8A.3	Y46E12A.4	NA	NA	NA	M18.7	T08H4.2	T06D8.3	F22F4.3	F16H11.1	C34D1.4	C34B4.3	F37B1.3	F44F1.6	R03G5.2	NA	NA	Y43F4B.5	NA	NA	NA	F40F8.5	F17C8.3	M03F4.3	E04A4.5	NA	NA	NA	NA	NA	NA	T19H5.6	F22E12.3	Y54F10BM.6	NA	Y63D3A.9	NA	NA
B0564.10	F22B7.6	NA	NA	NA	NA	NA	NA	NA	C50A2.3	F27C1.7	F58F12.1	Y37D8A.4	Y46G5A.24	NA	NA	NA	R02C2.1	T08H4.3	T07D1.5	F22F7.6	F17A2.1	C34D4.15	C34B7.1	F37B4.6	F44G3.14	R04A9.4	NA	NA	Y43F8B.18	NA	NA	NA	F40F9.7	F17E9.1	M03F8.5	EEED8.1	NA	NA	NA	NA	NA	NA	T20B5.3	F22E5.4	Y54G11A.10	NA	Y67A10A.4	NA	NA
B0564.11	F22D3.1	NA	NA	NA	NA	NA	NA	NA	C50B6.2	F27D4.4	F58G4.4	Y37H2C.1	Y46G5A.39	NA	NA	NA	R02C2.2	T09B9.2	T07D3.1	F23C8.5	F17B5.2	C34E11.2	C34C12.7	F37B4.9	F45C12.11	R04A9.7	NA	NA	Y43H11AL.2	NA	NA	NA	F40G12.5	F17E9.7	M04B2.5	EEED8.14	NA	NA	NA	NA	NA	NA	T20F5.4	F22G12.4	Y54G9A.6	NA	Y67D8C.4	NA	NA
B0564.2	F22D6.3	NA	NA	NA	NA	NA	NA	NA	C50B6.3	F27D4.8	F59A1.10	Y38C1AA.12	Y47D3A.13	NA	NA	NA	R02C2.3	T09F3.1	T07D3.5	F23H12.4	F17C8.1	C34E7.3	C34C12.9	F37C4.2	F45C12.14	R04B3.2	NA	NA	Y44A6C.1	NA	NA	NA	F40G9.4	F17H10.2	M04C7.4	EEED8.5	NA	NA	NA	NA	NA	NA	T20F7.7	F23B2.11	Y54H5A.3	NA	Y69A2AR.7	NA	NA
B0564.3	F22D6.5	NA	NA	NA	NA	NA	NA	NA	C50B8.1	F27D9.5	F59A1.7	Y38E10A.28	Y47D7A.1	NA	NA	NA	R02C2.6	T09F5.1	T07D4.1	F23H12.5	F17C8.2	C34F11.3	C34C6.7	F38A5.10	F45C12.4	R04E5.9	NA	NA	Y45G5AM.6	NA	NA	NA	F40H7.7	F18G5.3	M04D8.6	EEED8.9	NA	NA	NA	NA	NA	NA	T21D12.4	F23C8.11	Y55F3AM.12	NA	Y71A12B.11	NA	NA
B0564.6	F22E5.17	NA	NA	NA	NA	NA	NA	NA	C50B8.2	F28B3.8	F59A2.4	Y38H6C.11	Y47G6A.13	NA	NA	NA	R02D3.4	T10B5.7	T07F10.6	F23H12.7	F17E5.1	C34H4.1	C34D1.1	F38A5.14	F45C12.6	R05D11.1	NA	NA	Y46G5A.21	NA	NA	NA	F41B5.4	F19C6.4	M117.1	EGAP2.1	NA	NA	NA	NA	NA	NA	T21E8.1	F23C8.12	Y55F3AM.15	NA	Y71F9B.4	NA	NA
B0564.7	F22E5.9	NA	NA	NA	NA	NA	NA	NA	C50C3.1	F28C6.1	F59A3.9	Y39B6A.19	Y47G6A.20	NA	NA	NA	R02F11.4	T10H10.1	T07F12.1	F25E2.3	F18A12.8	C34H4.2	C34D1.3	F38A5.9	F45D11.10	R05D11.5	NA	NA	Y46H3A.6	NA	NA	NA	F41B5.6	F19C7.2	M60.7	F01D4.5	NA	NA	NA	NA	NA	NA	T22C1.6	F23F1.4	Y55F3AM.3	NA	Y71G12B.13	NA	NA
B0564.9	F22F1.2	NA	NA	NA	NA	NA	NA	NA	C50C3.8	F28C6.2	F59B1.10	Y39G10AL.1	Y47G6A.28	NA	NA	NA	R03A10.3	T11G6.4	T07F8.2	F25E2.4	F18E3.5	C34H4.3	C34D1.5	F38B2.6	F45D11.13	R05D3.2	NA	NA	Y47D3B.10	NA	NA	NA	F41E6.5	F19D8.1	M79.4	F01F1.11	NA	NA	NA	NA	NA	NA	T22C8.7	F23H11.6	Y55F3AM.6	NA	Y73B6BL.269	NA	NA
BE0003N10.1	F22G12.4	NA	NA	NA	NA	NA	NA	NA	C50D2.9	F28F8.4	F59D6.5	Y39G10AL.3	Y47G6A.8	NA	NA	NA	R03D7.2	T12D8.9	T07H6.1	F25E5.9	F18E9.3	C34H4.4	C34D10.2	F38E11.2	F45D11.5	R05D7.7	NA	NA	Y47D3B.11	NA	NA	NA	F41F3.2	F19F10.3	MTCE.35	F01F1.12	NA	NA	NA	NA	NA	NA	T22C8.8	F23H11.7	Y55F3AM.9	NA	Y73C8B.4	NA	NA
BE0003N10.2	F22G12.5	NA	NA	NA	NA	NA	NA	NA	C50E10.1	F28H1.3	F59E10.2	Y39G10AR.10	Y48A6B.3	NA	NA	NA	R04A9.2	T13B5.5	T08A9.11	F25F6.1	F18E9.8	C35A11.1	C34D4.13	F39D8.1	F45D3.1	R05F9.9	NA	NA	Y47D3B.4	NA	NA	NA	F41G3.11	F19H8.1	R02D5.6	F01F1.2	NA	NA	NA	NA	NA	NA	T22E5.6	F23H12.3	Y56A3A.12	NA	Y75B8A.19	NA	NA
BE0003N10.3	F23B12.5	NA	NA	NA	NA	NA	NA	NA	C50E3.11	F28H6.8	F59H6.11	Y41D4B.14	Y48A6C.3	NA	NA	NA	R04A9.7	T13C2.3	T08A9.3	F25H2.10	F18G5.2	C35A11.4	C34D4.15	F39G3.4	F45E12.3	R05H11.1	NA	NA	Y47D3B.9	NA	NA	NA	F42A10.4	F20A1.6	R02F2.8	F01G4.4	NA	NA	NA	NA	NA	NA	T22F7.1	F23H12.4	Y56A3A.28	NA	Y76B12C.8	NA	NA
BE10.1	F23B12.7	NA	NA	NA	NA	NA	NA	NA	C50E3.12	F28H7.4	F59H6.8	Y42H9B.3	Y48G8AL.13	NA	NA	NA	R06A4.2	T13H5.6	T08G2.2	F25H5.1	F18G5.4	C35A5.1	C34D4.9	F40D4.3	F45E6.6	R06A4.8	NA	NA	Y47D9A.2	NA	NA	NA	F42G2.2	F20B6.4	R03A10.2	F02A9.4	NA	NA	NA	NA	NA	NA	T23B12.11	F23H12.7	Y56A3A.29	NA	Y77E11A.8	NA	NA
BE10.2	F23C8.4	NA	NA	NA	NA	NA	NA	NA	C50E3.13	F29B9.4	F59H6.9	Y43B11AL.1	Y48G8AL.7	NA	NA	NA	R06A4.6	T14A8.1	T08H4.1	F25H8.6	F19C7.8	C35A5.10	C34E11.2	F40D4.6	F45H11.1	R07A4.3	NA	NA	Y47G6A.23	NA	NA	NA	F42G2.5	F20C5.4	R03G8.3	F02A9.6	NA	NA	NA	NA	NA	NA	T23F6.1	F23H12.9	Y57A10A.13	NA	Y77E11A.9	NA	NA
BE10.3	F23C8.5	NA	NA	NA	NA	NA	NA	NA	C50E3.5	F29B9.6	H04D03.4	Y43F8C.14	Y48G9A.12	NA	NA	NA	R06B10.2	T14B1.1	T08H4.2	F26A1.3	F19D8.1	C35A5.11	C34E7.3	F40E10.2	F46A9.6	R07B1.1	NA	NA	Y48A5A.1	NA	NA	NA	F42G2.7	F20D1.3	R04A9.1	F02D10.6	NA	NA	NA	NA	NA	NA	T23F6.5	F25C8.3	Y57A10A.19	NA	Y81B9A.2	NA	NA
BE10.4	F23D12.2	NA	NA	NA	NA	NA	NA	NA	C50F2.2	F29C12.3	H04D03.6	Y45G5AM.5	Y49C4A.6	NA	NA	NA	R06C1.1	T14B4.4	T09B9.2	F26A3.6	F19H6.2	C35A5.3	C34F11.8	F40E10.5	F46C8.3	R07B1.12	NA	NA	Y48B6A.6	NA	NA	NA	F43C1.3	F20D1.8	R04A9.6	F02E11.3	NA	NA	NA	NA	NA	NA	T23G5.3	F25D1.2	Y57A10B.6	NA	Y82E9BL.3	NA	NA
BE10.5	F23F1.1	NA	NA	NA	NA	NA	NA	NA	C50F4.12	F29G9.1	H04M03.3	Y46C8AL.11	Y49F6B.5	NA	NA	NA	R06C7.8	T14B4.5	T09D3.3	F26D11.10	F19H6.7	C35A5.6	C34G6.2	F40F12.5	F46E10.2	R07B5.9	NA	NA	Y48G10A.3	NA	NA	NA	F43H9.3	F20D1.9	R05D8.10	F02E8.4	NA	NA	NA	NA	NA	NA	T23H4.1	F25E2.3	Y57A10C.11	NA	Y82E9BL.5	NA	NA
C01A2.1	F23F1.5	NA	NA	NA	NA	NA	NA	NA	C50F4.14	F29G9.5	H21P03.3	Y46E12A.4	Y49F6B.7	NA	NA	NA	R07B7.10	T14B4.7	T10H10.1	F26D2.14	F19H8.4	C35A5.7	C34H4.1	F40F4.6	F46F6.2	R07C3.11	NA	NA	Y48G1C.10	NA	NA	NA	F44B9.1	F20D6.2	R05G6.10	F02E9.1	NA	NA	NA	NA	NA	NA	T24A11.3	F25E5.16	Y57G11C.25	NA	Y82E9BL.6	NA	NA
C01A2.2	F23H11.3	NA	NA	NA	NA	NA	NA	NA	C50F4.16	F29G9.7	H24K24.2	Y46G5A.24	Y4C6B.1	NA	NA	NA	R07C3.1	T14D7.2	T10H9.1	F26F12.4	F20A1.4	C35B1.5	C34H4.2	F40F8.4	F47A4.2	R07C3.2	NA	NA	Y48G1C.11	NA	NA	NA	F45D3.2	F20D6.5	R06A4.10	F02E9.10	NA	NA	NA	NA	NA	NA	T24C12.4	F25E5.2	Y57G11C.9	NA	Y82E9BR.22	NA	NA
C01A2.3	F23H12.2	NA	NA	NA	NA	NA	NA	NA	C50F7.4	F30A10.5	H24O09.2	Y46H3C.5	Y51H7BR.1	NA	NA	NA	R07C3.10	T14F9.4	T11F9.2	F26G1.11	F20A1.7	C35B1.7	C34H4.3	F40F8.8	F47B7.2	R07C3.5	NA	NA	Y48G1C.4	NA	NA	NA	F45D3.3	F20E11.17	R06B10.3	F02E9.4	NA	NA	NA	NA	NA	NA	T24C4.8	F25F6.1	Y59A8A.1	NA	Y87G2A.2	NA	NA
C01A2.4	F25B4.7	NA	NA	NA	NA	NA	NA	NA	C52A10.1	F30B5.4	H27D07.6	Y46H3C.7	Y51H7C.3	NA	NA	NA	R07C3.12	T16A9.4	T11G6.3	F26G1.6	F20B4.6	C35C5.9	C34H4.4	F40F9.2	F47D12.5	R07C3.7	NA	NA	Y48G8AL.11	NA	NA	NA	F45F2.7	F21C10.11	R06C7.5	F02E9.7	NA	NA	NA	NA	NA	NA	T25C8.1	F25G6.6	Y59C2A.2	NA	Y87G2A.6	NA	NA
C01A2.5	F25B5.3	NA	NA	NA	NA	NA	NA	NA	C52B11.3	F30F8.1	H35B03.2	Y47D3A.13	Y53C10A.10	NA	NA	NA	R07C3.15	T16A9.5	T12A2.16	F26G1.9	F20B6.2	C35D10.14	C35A11.1	F40F9.8	F47G4.2	R08B4.2	NA	NA	Y49E10.11	NA	NA	NA	F45H10.5	F21C10.12	R07B1.2	F02H6.2	NA	NA	NA	NA	NA	NA	T25E4.1	F25G6.7	Y59E9AR.3	NA	Y94H6A.9	NA	NA
C01A2.7	F25B5.6	NA	NA	NA	NA	NA	NA	NA	C52E12.1	F30F8.10	H37A05.4	Y47D7A.1	Y53C10A.5	NA	NA	NA	R07C3.6	T18D3.6	T12E12.6	F27C1.13	F20B6.3	C36A4.2	C35A11.4	F40H3.1	F48E3.6	R08C7.13	NA	NA	Y50C1A.1	NA	NA	NA	F46B6.7	F21C10.13	R07B7.13	F02H6.3	NA	NA	NA	NA	NA	NA	T25F10.4	F25H5.1	Y59E9AR.5	NA	ZC204.10	NA	NA
C01A2.9	F25D7.4	NA	NA	NA	NA	NA	NA	NA	C52E12.3	F31A3.2	H38K22.2	Y47D7A.8	Y53F4B.43	NA	NA	NA	R07C3.8	T19B10.2	T13C5.2	F27D9.1	F20D1.3	C36B1.13	C35A5.1	F40H3.2	F48E8.8	R08F11.1	NA	NA	Y50D4A.4	NA	NA	NA	F46C5.10	F21C10.4	R07B7.3	F02H6.4	NA	NA	NA	NA	NA	NA	T25F10.5	F25H8.6	Y5H2B.3	NA	ZC376.3	NA	NA
C01B10.10	F25G6.9	NA	NA	NA	NA	NA	NA	NA	C52E4.4	F31A3.4	H40L08.1	Y47G6A.13	Y53F4B.9	NA	NA	NA	R07C3.9	T19B10.5	T13C5.7	F27D9.3	F20D6.5	C36B1.6	C35A5.10	F41B4.1	F48F7.4	R107.8	NA	NA	Y50E8A.16	NA	NA	NA	F46C8.7	F21C10.8	R07B7.5	F07A5.1	NA	NA	NA	NA	NA	NA	T26A8.2	F25H8.7	Y60A9.3	NA	ZC84.3	NA	NA
C01B10.11	F25H2.13	NA	NA	NA	NA	NA	NA	NA	C52E4.6	F31A9.4	H40L08.3	Y47G6A.7	Y53G8B.4	NA	NA	NA	R08C7.9	T19C4.1	T14A8.1	F27E5.4	F20D6.8	C36B7.5	C35A5.3	F41B5.3	F48F7.6	R10D12.8	NA	NA	Y51F10.10	NA	NA	NA	F46F11.6	F21C3.1	R07E3.5	F08B4.1	NA	NA	NA	NA	NA	NA	T26C5.2	F26A1.9	Y63D3A.8	NA	ZK1055.1	NA	NA
C01B10.3	F25H2.5	NA	NA	NA	NA	NA	NA	NA	C53D6.4	F31B9.3	H42K12.1	Y47H10A.2	Y53H1A.4	NA	NA	NA	R09E12.8	T19D12.6	T14B1.1	F28A12.2	F20G4.2	C36E6.3	C35A5.6	F41B5.4	F49B2.1	R10E11.7	NA	NA	Y51F10.5	NA	NA	NA	F46F5.15	F21C3.2	R07E3.7	F08B4.6	NA	NA	NA	NA	NA	NA	T27A1.6	F26A3.6	Y66A7A.8	NA	ZK1098.3	NA	NA
C01B10.4	F25H2.9	NA	NA	NA	NA	NA	NA	NA	C54C6.6	F31C3.2	K01D12.13	Y47H9B.2	Y54E10BR.7	NA	NA	NA	R09H3.3	T19D2.2	T14B4.4	F28A12.4	F21A3.3	C36H8.2	C35B1.5	F41D3.6	F49B2.7	R10E12.2	NA	NA	Y53C12B.6	NA	NA	NA	F46H5.8	F21D12.3	R07H5.11	F08F3.2	NA	NA	NA	NA	NA	NA	T27B7.1	F26C11.2	Y66D12A.19	NA	ZK154.5	NA	NA
C01B10.44	F25H5.3	NA	NA	NA	NA	NA	NA	NA	C54G10.2	F31E3.4	K01G5.4	Y48G1C.6	Y54E5A.5	NA	NA	NA	R10D12.9	T19D7.4	T14C1.3	F28B4.3	F21A3.7	C36H8.3	C35B1.7	F41E7.9	F49D11.10	R10E4.1	NA	NA	Y53C12C.1	NA	NA	NA	F47B8.7	F21D12.5	R08H2.7	F08F8.4	NA	NA	NA	NA	NA	NA	T27F7.2	F26D11.10	Y67D2.7	NA	ZK185.2	NA	NA
C01B10.5	F25H8.1	NA	NA	NA	NA	NA	NA	NA	C54G10.3	F31E9.4	K01H12.2	Y49C4A.8	Y54F10BM.6	NA	NA	NA	R10E4.4	T19H12.6	T14E8.3	F28C6.5	F21C10.6	C37A5.4	C35C5.9	F41F3.2	F49H12.1	R10E4.2	NA	NA	Y53G8AR.8	NA	NA	NA	F47C10.2	F21E9.3	R102.6	F08F8.9	NA	NA	NA	NA	NA	NA	T28C12.6	F26D2.13	Y69A2AR.1	NA	ZK430.1	NA	NA
C01B10.6	F26A1.1	NA	NA	NA	NA	NA	NA	NA	C54G4.6	F32A11.1	K02B12.4	Y49F6B.3	Y54G9A.9	NA	NA	NA	R10E4.6	T21B6.2	T14E8.4	F28D1.9	F21D12.3	C37C3.10	C35D10.14	F41G3.5	F49H6.5	R11A5.3	NA	NA	Y53G8B.1	NA	NA	NA	F47G3.1	F22B7.9	R10E8.1	F08G5.1	NA	NA	NA	NA	NA	NA	T28C6.4	F26D2.14	Y69A2AR.16	NA	ZK563.5	NA	NA
C01B10.7	F26A3.3	NA	NA	NA	NA	NA	NA	NA	C54G4.7	F32A5.7	K02B12.8	Y49F6B.7	Y55B1BR.3	NA	NA	NA	R11.4	T21C9.6	T14F9.4	F28E10.1	F21F3.1	C37C3.11	C35E7.7	F41H10.9	F52B11.5	R11D1.10	NA	NA	Y54E10BR.1	NA	NA	NA	F47G6.2	F22D6.12	R10H1.1	F08H9.1	NA	NA	NA	NA	NA	NA	T28C6.6	F26F12.3	Y69A2AR.17	NA	ZK637.4	NA	NA
C01B10.8	F26A3.7	NA	NA	NA	NA	NA	NA	NA	C54G4.9	F32D1.2	K02B2.1	Y50D4B.2	Y55H10A.2	NA	NA	NA	R11A5.3	T21D12.7	T16G1.2	F28E10.4	F21F3.5	C37C3.12	C36A4.2	F42A9.7	F52B5.7	R11E3.4	NA	NA	Y54E2A.4	NA	NA	NA	F48C1.2	F22E5.21	R11D1.1	F09D1.1	NA	NA	NA	NA	NA	NA	T28F3.6	F26G1.11	Y69A2AR.3	NA	ZK673.3	NA	NA
C01B10.9	F26B1.2	NA	NA	NA	NA	NA	NA	NA	C54G6.1	F32D1.5	K02D3.1	Y51H7BR.2	Y56A3A.10	NA	NA	NA	R151.2	T21D12.9	T16G1.8	F28F5.3	F21F8.6	C37C3.13	C36B1.13	F42C5.10	F52C6.14	R11E3.6	NA	NA	Y54E5B.1	NA	NA	NA	F48E8.3	F22F1.3	R11D1.3	F09E5.1	NA	NA	NA	NA	NA	NA	VB0395L.1	F26G1.6	Y69A2AR.30	NA	ZK678.1	NA	NA
C01B12.1	F26B1.3	NA	NA	NA	NA	NA	NA	NA	C55A6.1	F32D1.7	K02D7.6	Y51H7C.15	Y56A3A.12	NA	NA	NA	R17.1	T22B7.1	T16H5.1	F28F5.4	F21H7.9	C37H5.1	C36B1.6	F42C5.6	F52D2.8	R11G1.7	NA	NA	Y54G2A.1	NA	NA	NA	F48F5.4	F23B2.10	R12C12.8	F09E5.11	NA	NA	NA	NA	NA	NA	W02A11.2	F26G1.9	Y6G8.3	NA	ZK688.6	NA	NA
C01B12.2	F26D10.10	NA	NA	NA	NA	NA	NA	NA	C55A6.9	F32D1.9	K02E7.9	Y53C10A.10	Y56A3A.14	NA	NA	NA	R52.1	T22C8.8	T18D3.5	F28F9.4	F22A3.1	C38C10.1	C36B7.5	F42D1.2	F52E10.1	R11H6.2	NA	NA	Y55D5A.1	NA	NA	NA	F48G7.10	F23B2.5	R12E2.11	F09E5.13	NA	NA	NA	NA	NA	NA	W03B1.7	F26H9.6	Y71A12B.2	NA	ZK688.7	NA	NA
C01B12.3	F26D10.3	NA	NA	NA	NA	NA	NA	NA	C55B6.1	F32H2.10	K02F6.9	Y53C10A.5	Y56A3A.15	NA	NA	NA	T01B11.2	T23D8.8	T19A5.3	F28H1.2	F22A3.3	C38C10.6	C36C9.5	F42F12.7	F52E4.8	R12C12.8	NA	NA	Y55D5A.6	NA	NA	NA	F48G7.4	F23F1.2	R12G8.1	F09E5.17	NA	NA	NA	NA	NA	NA	W03C9.6	F27C1.13	Y71A12B.3	NA	ZK742.3	NA	NA
C01B12.4	F26E4.11	NA	NA	NA	NA	NA	NA	NA	C55B7.1	F32H2.3	K03A1.2	Y53F4B.24	Y56A3A.33	NA	NA	NA	T01E8.2	T23G11.6	T19C3.3	F28H7.7	F22B5.3	C38C3.2	C36E6.3	F42G2.2	F52F12.6	R12H7.3	NA	NA	Y55F3C.9	NA	NA	NA	F49C5.4	F23F1.6	R13A1.2	F09E5.2	NA	NA	NA	NA	NA	NA	W03G11.3	F27D9.1	Y71F9B.16	NA	ZK930.1	NA	NA
C01B12.5	F26F4.4	NA	NA	NA	NA	NA	NA	NA	C55B7.11	F32H2.4	K03A11.1	Y53F4B.7	Y57A10C.1	NA	NA	NA	T01G9.4	T23H4.1	T19C3.4	F29B9.8	F22E12.1	C38C3.9	C36E6.5	F42G4.3	F52H3.5	R12H7.5	NA	NA	Y57A10A.25	NA	NA	NA	F49D11.2	F23F1.7	R13A1.5	F09G2.2	NA	NA	NA	NA	NA	NA	W04E12.9	F27D9.7	Y71G12B.1	NA	ZK938.2	NA	NA
C01B12.8	F26G1.1	NA	NA	NA	NA	NA	NA	NA	C55B7.5	F33A8.1	K04C1.3	Y53G8B.4	Y57A10C.11	NA	NA	NA	T02G6.11	T24C2.5	T19D12.7	F29C12.1	F22E12.3	C38C5.1	C36H8.3	F42G4.5	F53A2.3	R13A5.5	NA	NA	Y57G11C.13	NA	NA	NA	F49E11.3	F23H12.1	R13F6.9	F09G8.7	NA	NA	NA	NA	NA	NA	W04H10.2	F27E5.4	Y71G12B.9	NA	NA	NA	NA
C01B4.6	F26G5.1	NA	NA	NA	NA	NA	NA	NA	C55C3.3	F33D11.10	K04C2.3	Y54E10BR.7	Y57G11C.38	NA	NA	NA	T02G6.5	T24D8.4	T19E7.6	F29F11.1	F22F4.1	C38C6.3	C37A5.11	F42G9.9	F53B2.6	R13G10.1	NA	NA	Y57G11C.31	NA	NA	NA	F49E12.7	F25B4.9	R151.2	F10B5.5	NA	NA	NA	NA	NA	NA	W06B11.1	F28C6.9	Y71H2AM.11	NA	NA	NA	NA
C01B4.7	F26H11.5	NA	NA	NA	NA	NA	NA	NA	C55C3.5	F33D11.9	K04G2.1	Y54F10BL.1	Y62E10A.4	NA	NA	NA	T02G6.6	T25B9.1	T21B4.3	F29G6.3	F22F7.6	C38D4.8	C37A5.4	F43A11.3	F53C3.11	R13H4.4	NA	NA	Y57G11C.36	NA	NA	NA	F49E2.5	F25B5.1	R151.5	F10C2.2	NA	NA	NA	NA	NA	NA	W06B11.4	F28D1.9	Y71H2AM.5	NA	NA	NA	NA
C01B4.8	F26H11.6	NA	NA	NA	NA	NA	NA	NA	C56A3.4	F33D4.4	K04G7.11	Y54F10BM.12	Y62H9A.15	NA	NA	NA	T02H6.5	T25B9.7	T21B4.4	F29G9.6	F22G12.7	C38D9.2	C37C3.10	F43B10.2	F53G2.1	R166.4	NA	NA	Y59A8B.7	NA	NA	NA	F49E8.6	F25G6.5	R186.2	F10C5.2	NA	NA	NA	NA	NA	NA	W08E12.2	F28E10.1	Y71H2B.5	NA	NA	NA	NA
C01B4.9	F26H9.1	NA	NA	NA	NA	NA	NA	NA	C56A3.5	F33E11.3	K05F6.1	Y54F10BM.6	Y63D3A.10	NA	NA	NA	T03F1.9	T25G12.2	T21B6.2	F30B5.1	F23A7.5	C38H2.1	C37C3.11	F43C1.2	F53G2.2	R52.1	NA	NA	Y59A8B.9	NA	NA	NA	F49E8.7	F25H2.7	R186.4	F10D11.1	NA	NA	NA	NA	NA	NA	W08E12.3	F28F8.8	Y73B6BL.5	NA	NA	NA	NA
C01B7.1	F26H9.2	NA	NA	NA	NA	NA	NA	NA	C56A3.8	F33E11.6	K05F6.12	Y54F10BM.9	Y63D3A.2	NA	NA	NA	T03F6.3	T25G3.4	T21B6.5	F30H5.3	F23B2.10	C38H2.3	C37C3.12	F43C11.3	F53H8.1	R52.8	NA	NA	Y62E10A.6	NA	NA	NA	F49H12.7	F25H8.5	R52.3	F10D11.2	NA	NA	NA	NA	NA	NA	W08G11.1	F28H1.4	Y73C8C.3	NA	NA	NA	NA
C01B7.3	F27C8.6	NA	NA	NA	NA	NA	NA	NA	C56C10.3	F33G12.2	K05F6.2	Y55B1BR.3	Y66D12A.12	NA	NA	NA	T04A11.3	T26E3.2	T21D12.12	F31B12.1	F23B2.11	C39B10.2	C37C3.13	F43C9.1	F53H8.2	R57.1	NA	NA	Y62H9A.9	NA	NA	NA	F52C6.10	F26A1.8	R74.6	F10D7.5	NA	NA	NA	NA	NA	NA	Y102A11A.7	F29A7.4	Y73C8C.8	NA	NA	NA	NA
C01B7.4	F27D4.5	NA	NA	NA	NA	NA	NA	NA	C56C10.7	F33G12.4	K05F6.4	Y56A3A.14	Y67D8B.5	NA	NA	NA	T04D3.2	T27B1.1	T21F2.1	F31B12.3	F23F1.4	C39B10.7	C37H5.1	F43D2.6	F53H8.3	T01B11.2	NA	NA	Y65A5A.1	NA	NA	NA	F52C6.3	F26D11.6	R90.3	F10E7.6	NA	NA	NA	NA	NA	NA	Y102A11A.9	F29B9.5	Y73E7A.1	NA	NA	NA	NA
C01B7.5	F27D4.8	NA	NA	NA	NA	NA	NA	NA	CC8.2	F33H1.2	K05F6.5	Y56A3A.15	Y67H2A.5	NA	NA	NA	T05B11.1	T27B7.2	T21G5.2	F31D4.4	F23F12.13	C39B5.14	C37H5.9	F43E2.11	F53H8.4	T01G5.7	NA	NA	Y66A7A.3	NA	NA	NA	F52D10.1	F26F12.5	T01B10.4	F10E9.5	NA	NA	NA	NA	NA	NA	Y104H12BR.1	F29C12.1	Y73E7A.9	NA	NA	NA	NA
C01B7.6	F28B3.5	NA	NA	NA	NA	NA	NA	NA	CD4.6	F33H1.3	K05F6.7	Y56A3A.30	Y69F12A.2	NA	NA	NA	T05D4.2	T27B7.7	T21H3.3	F31D4.5	F23H12.7	C39D10.2	C38C10.6	F43H9.4	F54B11.3	T02C1.1	NA	NA	Y66D12A.13	NA	NA	NA	F52E1.13	F26F12.8	T01B11.1	F10E9.7	NA	NA	NA	NA	NA	NA	Y105C5B.29	F29G9.4	Y73F8A.13	NA	NA	NA	NA
C01B7.7	F28B3.6	NA	NA	NA	NA	NA	NA	NA	CD4.7	F34D10.2	K05F6.8	Y57A10C.1	Y69H2.6	NA	NA	NA	T05E12.10	T28C6.8	T22B7.1	F31D4.7	F25B3.3	C39D10.6	C38C3.10	F44A2.1	F54B11.6	T02G5.14	NA	NA	Y71F9AL.16	NA	NA	NA	F52F12.1	F26G1.2	T01B6.3	F10G7.8	NA	NA	NA	NA	NA	NA	Y110A7A.20	F30A10.1	Y73F8A.16	NA	NA	NA	NA
C01B9.1	F28C10.3	NA	NA	NA	NA	NA	NA	NA	CD4.8	F34D10.4	K06A5.6	Y57A10C.11	Y6D11A.1	NA	NA	NA	T05E12.8	T28F3.4	T22C1.7	F31D5.2	F25C8.3	C39E9.3	C38C3.6	F44F4.15	F54C4.4	T02G6.4	NA	NA	Y71F9AM.4	NA	NA	NA	F53B1.8	F26G1.3	T01B6.4	F10G8.3	NA	NA	NA	NA	NA	NA	Y110A7A.3	F30A10.2	Y73F8A.17	NA	NA	NA	NA
C01B9.4	F28F8.4	NA	NA	NA	NA	NA	NA	NA	D1007.16	F34D6.1	K06G5.2	Y57G11C.8	Y71A12B.11	NA	NA	NA	T05E7.5	T28F3.5	T22D1.18	F31E3.2	F25D1.4	C39E9.4	C38C5.1	F44G3.8	F54C8.1	T03D3.1	NA	NA	Y71F9B.1	NA	NA	NA	F53B2.3	F27E11.2	T01C8.1	F11A10.3	NA	NA	NA	NA	NA	NA	Y116A8C.3	F30H5.1	Y73F8A.25	NA	NA	NA	NA
C01C10.1	F28F8.5	NA	NA	NA	NA	NA	NA	NA	D1007.8	F35C8.7	K07A1.1	Y57G7A.2	Y71A12B.17	NA	NA	NA	T05H10.4	T28F3.8	T22F3.12	F31F4.1	F25E5.2	C39E9.7	C38C6.3	F45D11.1	F54D1.4	T03F1.6	NA	NA	Y71F9B.2	NA	NA	NA	F53C3.13	F28B3.10	T01G6.4	F11A10.5	NA	NA	NA	NA	NA	NA	Y116F11A.6	F30H5.2	Y74C10AR.1	NA	NA	NA	NA
C01C10.2	F28F8.6	NA	NA	NA	NA	NA	NA	NA	D1014.2	F35E12.3	K07A12.1	Y57G7A.7	Y71F9B.4	NA	NA	NA	T06E6.13	W01A8.3	T22F7.3	F31F4.12	F25E5.4	C39F7.1	C38D9.2	F45D3.2	F54D11.1	T04A6.5	NA	NA	Y71F9B.3	NA	NA	NA	F53F1.10	F28D1.3	T01G6.5	F11A10.8	NA	NA	NA	NA	NA	NA	Y11D7A.9	F30H5.5	Y75B12A.2	NA	NA	NA	NA
C01C10.3	F29D10.4	NA	NA	NA	NA	NA	NA	NA	D1014.3	F35F10.12	K07C5.3	Y59E1A.2	Y71G12B.15	NA	NA	NA	T07A9.9	W01C8.1	T22G5.2	F31F4.18	F25F6.1	C39H7.4	C38H2.1	F45D3.4	F54F7.1	T04B8.2	NA	NA	Y71F9B.8	NA	NA	NA	F53F10.2	F28D1.6	T01H3.2	F11A3.2	NA	NA	NA	NA	NA	NA	Y17D7A.3	F31A3.3	Y75B8A.22	NA	NA	NA	NA
C01C10.4	F29G9.2	NA	NA	NA	NA	NA	NA	NA	D1014.4	F35F11.1	K08D10.13	Y61A9LA.1	Y73B6BL.2	NA	NA	NA	T07D10.1	W02B8.1	T23B7.3	F31F6.5	F25G6.3	C39H7.7	C38H2.3	F45E10.1	F54H12.5	T04B8.3	NA	NA	Y71G12A.2	NA	NA	NA	F53F4.14	F28G4.1	T02B11.7	F11G11.2	NA	NA	NA	NA	NA	NA	Y17D7B.10	F31D5.4	Y75B8A.25	NA	NA	NA	NA
C01C4.1	F30A10.3	NA	NA	NA	NA	NA	NA	NA	D1022.1	F35G12.10	K08E4.2	Y62E10A.17	Y73C8A.1	NA	NA	NA	T07F12.2	W02B8.3	T23C6.5	F31F7.1	F25H5.1	C39H7.9	C39B10.2	F45E4.3	F55A12.8	T04C10.1	NA	NA	Y73C8B.1	NA	NA	NA	F53F4.9	F28H6.1	T02B11.8	F11G11.5	NA	NA	NA	NA	NA	NA	Y17D7B.3	F31D5.5	Y75B8A.31	NA	NA	NA	NA
C01C4.3	F30B5.4	NA	NA	NA	NA	NA	NA	NA	D1022.7	F35G12.2	K08E7.1	Y62H9A.15	Y73C8B.4	NA	NA	NA	T07F8.1	W02B8.6	T23E7.5	F32A5.4	F25H8.6	C40A11.5	C39B10.5	F45G2.2	F55A4.1	T04C10.2	NA	NA	Y73C8B.2	NA	NA	NA	F53H10.2	F28H7.8	T02D1.4	F11G11.7	NA	NA	NA	NA	NA	NA	Y27F2A.9	F31E3.2	Y76B12C.6	NA	NA	NA	NA
C01C7.1	F30F8.1	NA	NA	NA	NA	NA	NA	NA	D1037.1	F35G12.4	K08E7.2	Y63D3A.10	Y76B12C.8	NA	NA	NA	T08A9.4	W02C12.1	T23F1.5	F32A6.2	F26A1.9	C40C9.2	C39B10.7	F45H10.5	F55A4.5	T04D1.2	NA	NA	Y73E7A.3	NA	NA	NA	F54B8.3	F29B9.12	T02D1.5	F12F6.2	NA	NA	NA	NA	NA	NA	Y32H12A.6	F31F4.1	Y77E11A.13	NA	NA	NA	NA
C01F1.1	F30F8.10	NA	NA	NA	NA	NA	NA	NA	D1043.1	F35G12.9	K08F11.3	Y63D3A.9	Y77E11A.8	NA	NA	NA	T08A9.5	W03A5.4	T23F2.1	F32A7.5	F26A10.2	C40C9.4	C39D10.2	F46A8.7	F55A4.8	T04G9.3	NA	NA	Y75B8A.29	NA	NA	NA	F54C9.11	F29C12.6	T03D8.3	F12F6.5	NA	NA	NA	NA	NA	NA	Y37A1B.13	F31F7.2	Y77E11A.7	NA	NA	NA	NA
C01F1.2	F30F8.3	NA	NA	NA	NA	NA	NA	NA	D1044.6	F35G2.2	K08F4.9	Y71A12B.11	Y77E11A.9	NA	NA	NA	T08A9.6	W03B1.1	T23F2.3	F32B4.5	F26A3.6	C40D2.2	C39D10.6	F46B3.5	F55B11.1	T04G9.4	NA	NA	Y75B8A.6	NA	NA	NA	F54D12.3	F29F11.4	T04A8.5	F12F6.7	NA	NA	NA	NA	NA	NA	Y37A1B.7	F32A11.6	Y79H2A.3	NA	NA	NA	NA
C01F1.3	F30F8.9	NA	NA	NA	NA	NA	NA	NA	D1046.2	F35H10.5	K08H2.2	Y71A12B.17	Y80D3A.3	NA	NA	NA	T08B6.1	W03B1.2	T23F6.2	F32B4.8	F26C11.1	C40H1.3	C39E9.3	F46C5.10	F55C9.13	T05A7.4	NA	NA	Y75B8A.9	NA	NA	NA	F54D12.7	F31A9.2	T04B2.5	F13A2.4	NA	NA	NA	NA	NA	NA	Y37D8A.16	F32A6.5	Y80D3A.2	NA	NA	NA	NA
C01F1.4	F31B9.3	NA	NA	NA	NA	NA	NA	NA	D1054.2	F35H10.6	K08H2.3	Y71H10A.1	Y81B9A.2	NA	NA	NA	T08B6.5	W03D8.6	T23G11.6	F32B5.6	F26C11.2	C40H1.5	C39E9.4	F46C5.3	F55C9.3	T05B11.1	NA	NA	Y76A2B.4	NA	NA	NA	F54E7.7	F31D4.6	T04C12.2	F13A7.10	NA	NA	NA	NA	NA	NA	Y37H2A.10	F32B5.2	Y82E9BR.16	NA	NA	NA	NA
C01F1.5	F31C3.2	NA	NA	NA	NA	NA	NA	NA	D1054.3	F35H8.7	K09E3.5	Y73C8B.4	Y81G3A.5	NA	NA	NA	T08G2.3	W03F9.11	T23H4.1	F32D8.7	F26D11.10	C40H5.2	C39E9.7	F46E10.11	F55C9.4	T05E11.8	NA	NA	Y7A9D.1	NA	NA	NA	F55A12.2	F31D5.2	T05A1.5	F13B12.6	NA	NA	NA	NA	NA	NA	Y38A10A.2	F32D1.4	Y82E9BR.18	NA	NA	NA	NA
C01F1.6	F31C3.4	NA	NA	NA	NA	NA	NA	NA	D1081.7	F36A2.13	K09F5.5	Y76B12C.8	Y82E9BL.2	NA	NA	NA	T09A5.10	W03G9.1	T24C2.5	F32E10.3	F26D2.13	C40H5.4	C39E9.8	F46F11.3	F55C9.7	T06E4.3	NA	NA	Y82E9BR.19	NA	NA	NA	F55A12.9	F31E8.2	T05A8.5	F13B9.8	NA	NA	NA	NA	NA	NA	Y38C1AA.14	F32D8.1	Y87G2A.1	NA	NA	NA	NA
C01F4.2	F31F6.1	NA	NA	NA	NA	NA	NA	NA	D1081.9	F36A2.7	K09H9.7	Y80D3A.3	Y82E9BL.6	NA	NA	NA	T09F5.12	W04C9.1	T25B2.3	F32H5.1	F26D2.14	C40H5.7	C39F7.1	F46F2.2	F55C9.8	T06E4.7	NA	NA	Y8G1A.2	NA	NA	NA	F55A3.2	F31F6.4	T05C12.2	F13E6.3	NA	NA	NA	NA	NA	NA	Y38C1AB.1	F32D8.15	Y87G2A.7	NA	NA	NA	NA
C01F6.1	F31F6.2	NA	NA	NA	NA	NA	NA	NA	D1086.4	F36F12.8	K10B2.3	Y81G3A.6	Y92H12BR.4	NA	NA	NA	T10B5.6	W04C9.3	T25F10.1	F32H5.7	F26G1.5	C41C4.1	C39H7.7	F46F2.3	F55D10.3	T06E6.1	NA	NA	Y92H12A.2	NA	NA	NA	F55B11.6	F31F6.6	T05H4.15	F13E9.1	NA	NA	NA	NA	NA	NA	Y38C1AB.5	F32D8.7	Y92C3B.2	NA	NA	NA	NA
C01F6.2	F31F6.3	NA	NA	NA	NA	NA	NA	NA	D2005.3	F36H12.2	K10C9.6	Y82E9BL.2	Y97E10AR.5	NA	NA	NA	T10B5.8	W04D2.1	T25F10.5	F33A8.2	F26G1.6	C41C4.10	C40C9.2	F46G10.4	F55F3.1	T07A9.15	NA	NA	Y9C12A.1	NA	NA	NA	F55C12.1	F32B4.5	T05H4.4	F13G3.4	NA	NA	NA	NA	NA	NA	Y38C1AB.6	F32E10.7	Y92H12A.5	NA	NA	NA	NA
C01F6.4	F32A11.1	NA	NA	NA	NA	NA	NA	NA	D2005.4	F36H2.2	K10G4.10	Y82E9BL.3	Y9C9A.13	NA	NA	NA	T10C6.7	W04G3.1	T25F10.6	F33A8.7	F26H9.8	C41C4.12	C40D2.2	F46G11.4	F55F8.5	T07D4.2	NA	NA	Y9D1A.2	NA	NA	NA	F55C5.11	F32B6.9	T06A1.5	F13G3.7	NA	NA	NA	NA	NA	NA	Y38E10A.16	F32E10.8	Y92H12BR.3	NA	NA	NA	NA
C01F6.5	F32A11.2	NA	NA	NA	NA	NA	NA	NA	D2005.5	F36H9.3	K10H10.3	Y82E9BL.5	ZC155.4	NA	NA	NA	T11A5.5	W05B5.4	T25G12.3	F33D11.5	F27C1.11	C41C4.5	C40H1.5	F47A4.5	F55G1.11	T07E3.3	NA	NA	ZC247.3	NA	NA	NA	F55D10.4	F32D1.11	T06A1.7	F13G3.9	NA	NA	NA	NA	NA	NA	Y38F1A.9	F32H5.7	Y92H12BR.7	NA	NA	NA	NA
C01F6.6	F32A7.4	NA	NA	NA	NA	NA	NA	NA	D2005.7	F37A4.5	K11G12.4	Y82E9BL.6	ZC204.10	NA	NA	NA	T11G6.8	W05G11.4	T25G12.6	F33D4.1	F27D9.1	C41D7.2	C40H1.7	F47B7.1	F55G7.2	T08A9.1	NA	NA	ZC404.3	NA	NA	NA	F55E10.7	F32D8.2	T06C10.4	F13H10.3	NA	NA	NA	NA	NA	NA	Y38H8A.5	F33A8.10	Y94H6A.11	NA	NA	NA	NA
C01F6.8	F32B6.2	NA	NA	NA	NA	NA	NA	NA	D2007.4	F37A4.9	K12C11.1	Y82E9BR.2	ZC204.2	NA	NA	NA	T12A2.3	W05H5.3	T27A1.6	F33D4.6	F27D9.8	C41G11.1	C40H1.8	F47B7.7	F56A11.3	T09B4.5	NA	NA	ZC506.3	NA	NA	NA	F55F3.1	F32D8.8	T06C12.6	F13H10.8	NA	NA	NA	NA	NA	NA	Y39A1C.1	F33A8.7	ZC168.4	NA	NA	NA	NA
C01F6.9	F32B6.8	NA	NA	NA	NA	NA	NA	NA	D2013.2	F37B1.5	K12C11.2	ZC204.10	ZC204.7	NA	NA	NA	T12G3.2	W06B11.3	T27A10.2	F34D10.6	F27E5.8	C41G11.4	C40H5.2	F47B8.6	F56A12.1	T09B4.6	NA	NA	ZC518.1	NA	NA	NA	F56A11.4	F32G8.1	T06E8.1	F14B4.2	NA	NA	NA	NA	NA	NA	Y39B6A.6	F33D11.5	ZC204.3	NA	NA	NA	NA
C01G10.1	F32D1.6	NA	NA	NA	NA	NA	NA	NA	D2013.8	F37B12.3	K12H6.11	ZC204.8	ZC204.8	NA	NA	NA	T13F2.1	W06B11.4	T27A10.6	F35C8.3	F28B4.3	C41G7.7	C40H5.4	F47B8.8	F56A4.12	T09B4.8	NA	NA	ZK1058.2	NA	NA	NA	F56A4.9	F32G8.2	T07A5.7	F14D2.1	NA	NA	NA	NA	NA	NA	Y39E4B.9	F33D4.6	ZC239.20	NA	NA	NA	NA
C01G10.10	F32D1.7	NA	NA	NA	NA	NA	NA	NA	D2013.9	F37C12.18	K12H6.2	ZC373.1	ZC328.4	NA	NA	NA	T13G4.1	W06H8.4	T27B1.1	F35C8.5	F28C6.5	C41G7.8	C41C4.1	F47C10.2	F56A8.8	T10C6.11	NA	NA	ZK1067.1	NA	NA	NA	F56B6.5	F32G8.3	T07A9.8	F14D2.12	NA	NA	NA	NA	NA	NA	Y39G10AR.6	F33E2.2	ZC262.2	NA	NA	NA	NA
C01G10.11	F32D8.5	NA	NA	NA	NA	NA	NA	NA	D2023.6	F37C12.3	K12H6.7	ZK1058.6	ZC373.1	NA	NA	NA	T14G8.2	W07A12.6	T27B7.7	F35C8.8	F28C6.9	C41H7.7	C41C4.10	F47D12.9	F56C4.1	T10C6.12	NA	NA	ZK1067.2	NA	NA	NA	F56D5.3	F32G8.4	T07C12.15	F14D2.13	NA	NA	NA	NA	NA	NA	Y40H7A.4	F34D10.5	ZC328.4	NA	NA	NA	NA
C01G10.12	F32E10.9	NA	NA	NA	NA	NA	NA	NA	D2024.3	F37C4.5	LLC1.1	ZK185.2	ZC84.3	NA	NA	NA	T15H9.5	W08D2.1	T27C4.2	F35C8.9	F28D1.9	C42C1.1	C41C4.5	F47D2.6	F57B9.8	T11B7.1	NA	NA	ZK1251.9	NA	NA	NA	F56E3.3	F32G8.6	T07D10.6	F14D2.15	NA	NA	NA	NA	NA	NA	Y43F8B.4	F34D6.4	ZC410.3	NA	NA	NA	NA
C01G10.14	F32H2.10	NA	NA	NA	NA	NA	NA	NA	D2024.5	F37D6.1	M01D1.8	ZK20.6	ZK1055.1	NA	NA	NA	T15H9.6	W09B12.1	T28A11.11	F35D11.11	F28E10.1	C42D4.1	C41D7.2	F47G3.1	F57C7.1	T11F9.11	NA	NA	ZK1290.8	NA	NA	NA	F56F11.1	F32H5.3	T07D4.1	F14D2.2	NA	NA	NA	NA	NA	NA	Y44A6D.2	F34H10.3	ZC518.3	NA	NA	NA	NA
C01G10.15	F33D11.11	NA	NA	NA	NA	NA	NA	NA	D2030.1	F37D6.2	M01D7.1	ZK250.6	ZK1058.6	NA	NA	NA	T16G12.4	W09C5.11	VF13D12L.3	F35D2.1	F28E10.2	C42D4.11	C41G11.1	F47H4.8	F57F4.1	T12B5.11	NA	NA	ZK1307.6	NA	NA	NA	F56F11.3	F32H5.6	T07E3.6	F14D2.4	NA	NA	NA	NA	NA	NA	Y45F3A.2	F35A5.1	ZC53.6	NA	NA	NA	NA
C01G10.16	F33E11.2	NA	NA	NA	NA	NA	NA	NA	D2030.2	F38A5.13	M01E5.6	ZK287.5	ZK1127.5	NA	NA	NA	T16G12.8	Y102A11A.2	VM106R.1	F35D2.4	F28F9.4	C42D4.13	C41G11.4	F48A11.2	F57F4.2	T12G3.1	NA	NA	ZK180.4	NA	NA	NA	F56H9.1	F33C8.3	T07G12.5	F14D7.2	NA	NA	NA	NA	NA	NA	Y45F3A.8	F35A5.4	ZK1010.3	NA	NA	NA	NA
C01G10.17	F33G12.2	NA	NA	NA	NA	NA	NA	NA	D2030.6	F38C2.5	M02D8.3	ZK402.3	ZK1248.19	NA	NA	NA	T17A3.1	Y102A11A.9	W01C9.1	F35D2.5	F28G4.1	C43C3.1	C41G6.2	F48A9.1	F57G9.3	T12G3.2	NA	NA	ZK185.5	NA	NA	NA	F56H9.2	F33H1.6	T07H3.1	F14H3.6	NA	NA	NA	NA	NA	NA	Y47D3B.3	F35C5.9	ZK1058.4	NA	NA	NA	NA
C01G10.18	F33G12.3	NA	NA	NA	NA	NA	NA	NA	D2030.7	F38C2.7	M04F3.1	ZK430.5	ZK1290.3	NA	NA	NA	T17A3.3	Y105C5A.24	W01C9.3	F35D2.6	F28G4.2	C43C3.2	C41G7.7	F48A9.2	F58B3.9	T13A10.11	NA	NA	ZK265.4	NA	NA	NA	F57A8.4	F33H12.7	T08B1.6	F15A4.10	NA	NA	NA	NA	NA	NA	Y47D9A.1	F35C8.8	ZK1067.3	NA	NA	NA	NA
C01G10.4	F33H1.2	NA	NA	NA	NA	NA	NA	NA	D2030.8	F39B2.10	M04G7.3	ZK637.11	ZK1320.10	NA	NA	NA	T17A3.4	Y105C5B.19	W02A2.2	F35E12.9	F28H7.2	C43F9.10	C41G7.8	F48B9.1	F58D2.1	T13F2.3	NA	NA	ZK328.6	NA	NA	NA	F57A8.8	F35B12.4	T08B2.4	F15A4.11	NA	NA	NA	NA	NA	NA	Y47G6A.18	F35C8.9	ZK1098.11	NA	NA	NA	NA
C01G10.5	F33H1.3	NA	NA	NA	NA	NA	NA	NA	D2030.9	F39B2.3	M05B5.4	ZK637.4	ZK20.6	NA	NA	NA	T17A3.6	Y105E8A.5	W02B8.3	F35F10.11	F29C12.1	C43F9.11	C41H7.7	F48C1.11	F58D2.2	T13F2.8	NA	NA	ZK484.3	NA	NA	NA	F57B10.6	F35B12.6	T08E11.2	F15A4.12	NA	NA	NA	NA	NA	NA	Y47G6A.32	F35D11.1	ZK1098.2	NA	NA	NA	NA
C01G10.6	F33H1.4	NA	NA	NA	NA	NA	NA	NA	D2063.3	F39B2.7	M106.7	ZK662.4	ZK512.3	NA	NA	NA	T17A3.7	Y105E8B.9	W02B8.6	F35H10.10	F29F11.1	C43F9.5	C42C1.1	F48G7.10	F58D5.1	T13G4.4	NA	NA	ZK512.1	NA	NA	NA	F57B10.8	F35C11.4	T08E11.3	F15B9.4	NA	NA	NA	NA	NA	NA	Y48B6A.8	F35D11.2	ZK1127.12	NA	NA	NA	NA
C01G10.7	F33H2.2	NA	NA	NA	NA	NA	NA	NA	D2092.5	F39F10.3	M110.4	ZK673.2	ZK512.4	NA	NA	NA	T17A3.9	Y106G6H.1	W02D9.10	F35H10.3	F29F11.4	C43F9.7	C42D4.1	F48G7.5	F58E1.12	T14F9.3	NA	NA	ZK550.3	NA	NA	NA	F57B9.5	F35C11.6	T08G11.3	F15D3.6	NA	NA	NA	NA	NA	NA	Y49E10.23	F35G2.5	ZK1127.3	NA	NA	NA	NA
C01G10.8	F34D10.4	NA	NA	NA	NA	NA	NA	NA	D2096.12	F39H11.5	M116.1	ZK673.3	ZK593.1	NA	NA	NA	T19C3.5	Y110A7A.20	W03A5.3	F35H10.4	F29G6.3	C43F9.9	C42D4.3	F48G7.9	F58E1.3	T14F9.5	NA	NA	ZK686.3	NA	NA	NA	F57C2.1	F35C12.2	T08G11.4	F15E6.1	NA	NA	NA	NA	NA	NA	Y50D7A.12	F35H10.10	ZK1248.11	NA	NA	NA	NA
C01G10.9	F35C11.5	NA	NA	NA	NA	NA	NA	NA	D2096.4	F39H2.3	M116.4	ZK678.1	ZK596.2	NA	NA	NA	T19C4.6	Y116A8C.3	W03A5.7	F35H12.1	F30A10.12	C44B11.4	C42D8.9	F49C5.10	F58E1.5	T14G10.5	NA	NA	ZK75.2	NA	NA	NA	F57C7.4	F35C12.3	T09D3.5	F15H10.3	NA	NA	NA	NA	NA	NA	Y54E10BL.6	F35H12.1	ZK1251.7	NA	NA	NA	NA
C01G12.1	F35C5.1	NA	NA	NA	NA	NA	NA	NA	DC2.3	F39H2.5	M117.4	ZK688.7	ZK622.3	NA	NA	NA	T19H12.9	Y116F11B.2	W03B1.2	F35H12.7	F30A10.13	C44B11.6	C43C3.1	F49D11.11	F58E1.8	T14G12.4	NA	NA	ZK770.3	NA	NA	NA	F57C9.6	F35C8.1	T10B10.8	F16A11.1	NA	NA	NA	NA	NA	NA	Y54E5A.1	F35H12.6	ZK177.1	NA	NA	NA	NA
C01G12.10	F35C8.7	NA	NA	NA	NA	NA	NA	NA	DY3.4	F40A3.3	M151.1	ZK829.7	ZK643.2	NA	NA	NA	T20F7.7	Y11D7A.4	W03D8.6	F36A4.10	F30A10.2	C44B7.6	C43F9.11	F49D11.3	F58E1.9	T14G8.1	NA	NA	ZK792.6	NA	NA	NA	F57G9.1	F35C8.2	T10B5.8	F16A11.3	NA	NA	NA	NA	NA	NA	Y54F10AM.1	F35H12.7	ZK177.4	NA	NA	NA	NA
C01G12.11	F35F10.12	NA	NA	NA	NA	NA	NA	NA	DY3.7	F40E3.2	M151.5	ZK856.5	ZK662.4	NA	NA	NA	T20G5.4	Y15E3A.1	W03F11.5	F36D3.3	F30F8.2	C44B7.8	C43F9.5	F49D11.7	F58G6.1	T14G8.3	NA	NA	ZK899.2	NA	NA	NA	F58E10.3	F35D11.10	T10B9.5	F16D3.2	NA	NA	NA	NA	NA	NA	Y54F10BM.10	F36A2.4	ZK177.6	NA	NA	NA	NA
C01G12.13	F35G12.1	NA	NA	NA	NA	NA	NA	NA	DY3.8	F40F11.3	M151.6	NA	ZK678.1	NA	NA	NA	T21C12.4	Y17D7A.1	W03G11.3	F36F12.1	F30H5.2	C44C1.3	C43F9.7	F49E11.11	F58H1.5	T16A1.8	NA	NA	ZK909.4	NA	NA	NA	F58F9.1	F35E8.6	T10F2.2	F16H11.3	NA	NA	NA	NA	NA	NA	Y54G2A.37	F36D1.8	ZK20.3	NA	NA	NA	NA
C01G12.2	F35G12.12	NA	NA	NA	NA	NA	NA	NA	E_BE45912.2	F40F11.4	M151.8	NA	ZK688.6	NA	NA	NA	T21C12.8	Y17D7A.3	W04E12.9	F36F12.3	F30H5.3	C44C10.1	C44B11.4	F49E2.5	F58H7.7	T16G12.5	NA	NA	NA	NA	NA	NA	F58G4.7	F35E8.7	T10H9.2	F17C11.10	NA	NA	NA	NA	NA	NA	Y57G11C.10	F36D3.2	ZK287.5	NA	NA	NA	NA
C01G12.3	F35G12.3	NA	NA	NA	NA	NA	NA	NA	E01A2.1	F40G12.11	M153.1	NA	ZK863.5	NA	NA	NA	T22B2.1	Y17D7B.10	W04G3.8	F36F12.7	F31B12.1	C44C10.11	C44B11.6	F49E8.6	F59A1.10	T17A3.12	NA	NA	NA	NA	NA	NA	F59A1.7	F35F10.10	T11A5.6	F18A1.6	NA	NA	NA	NA	NA	NA	Y57G11C.22	F36F2.5	ZK328.5	NA	NA	NA	NA
C01G12.5	F35G12.5	NA	NA	NA	NA	NA	NA	NA	E01A2.4	F40G12.4	M18.3	NA	ZK938.7	NA	NA	NA	T22B2.2	Y17D7B.3	W04G5.10	F36G3.1	F31B12.3	C44C10.9	C44B12.2	F49F1.14	F59A2.4	T18D3.3	NA	NA	NA	NA	NA	NA	F59B1.4	F35F10.14	T11B7.5	F18A1.7	NA	NA	NA	NA	NA	NA	Y57G11C.39	F36G3.1	ZK353.6	NA	NA	NA	NA
C01G12.6	F35G2.1	NA	NA	NA	NA	NA	NA	NA	E01B7.1	F40G9.10	M18.7	NA	NA	NA	NA	NA	T22B7.5	Y17D7B.4	W04G5.2	F36H1.3	F31D5.3	C44E12.3	C44B7.6	F49H6.15	F59A7.4	T19B10.1	NA	NA	NA	NA	NA	NA	F59B1.6	F35G12.1	T11F9.1	F18A1.8	NA	NA	NA	NA	NA	NA	Y58A7A.5	F36G9.14	ZK353.9	NA	NA	NA	NA
C01G12.7	F35G2.2	NA	NA	NA	NA	NA	NA	NA	E01F3.1	F40G9.11	R01B10.2	NA	NA	NA	NA	NA	T22F3.4	Y17G7B.11	W05B2.4	F36H1.6	F31D5.5	C44F1.3	C44B7.8	F52D1.3	F59B2.3	T19C3.1	NA	NA	NA	NA	NA	NA	F59B2.13	F35G2.1	T11F9.2	F18A11.1	NA	NA	NA	NA	NA	NA	Y59H11AR.4	F36H1.11	ZK380.1	NA	NA	NA	NA
C01G12.8	F35H10.5	NA	NA	NA	NA	NA	NA	NA	E01G4.3	F40G9.17	R01H2.6	NA	NA	NA	NA	NA	T22H6.2	Y18D10A.6	W05B2.7	F36H2.5	F31F4.1	C44H4.8	C44C1.3	F52D2.9	F59F5.2	T20B12.3	NA	NA	NA	NA	NA	NA	F59E11.10	F35H12.4	T12A2.11	F18E9.6	NA	NA	NA	NA	NA	NA	Y5F2A.2	F36H5.10	ZK380.4	NA	NA	NA	NA
C01G12.9	F35H10.7	NA	NA	NA	NA	NA	NA	NA	E01G4.4	F41B4.3	R02C2.1	NA	NA	NA	NA	NA	T23C6.3	Y18D10A.8	W05B5.1	F36H5.1	F31F4.12	C44H9.6	C44C1.6	F52E1.13	H03G16.5	T20B3.1	NA	NA	NA	NA	NA	NA	F59E11.16	F35H8.2	T12B3.2	F19B10.2	NA	NA	NA	NA	NA	NA	Y5H2B.1	F36H5.3	ZK418.4	NA	NA	NA	NA
C01G5.2	F35H8.3	NA	NA	NA	NA	NA	NA	NA	E02H1.2	F41F3.2	R02C2.2	NA	NA	NA	NA	NA	T23G5.2	Y1H11.2	W05B5.4	F36H9.5	F31F4.18	C45B11.3	C44C10.1	F52E1.4	H13N06.5	T20D4.19	NA	NA	NA	NA	NA	NA	F59G1.4	F35H8.6	T12B3.3	F19B10.5	NA	NA	NA	NA	NA	NA	Y5H2B.5	F36H9.5	ZK546.1	NA	NA	NA	NA
C01G5.3	F36A2.9	NA	NA	NA	NA	NA	NA	NA	E02H1.4	F41G3.6	R02C2.3	NA	NA	NA	NA	NA	T24B8.6	Y22D7AL.4	W05G11.4	F38A1.1	F31F6.5	C45B2.2	C44C10.11	F52H3.7	H15N14.1	T21B6.1	NA	NA	NA	NA	NA	NA	F59H6.10	F36A4.6	T12B5.13	F19D8.2	NA	NA	NA	NA	NA	NA	Y62E10A.20	F36H9.7	ZK546.11	NA	NA	NA	NA
C01G5.4	F36D4.5	NA	NA	NA	NA	NA	NA	NA	E02H4.6	F41H10.10	R02C2.6	NA	NA	NA	NA	NA	T24C12.3	Y22D7AL.9	W05H7.1	F38A1.4	F31F7.2	C45B2.4	C44C10.9	F53A10.2	H20J04.4	T22B7.3	NA	NA	NA	NA	NA	NA	H02I12.3	F36D1.10	T12B5.3	F19F10.11	NA	NA	NA	NA	NA	NA	Y62E10A.9	F37A4.3	ZK632.1	NA	NA	NA	NA
C01G5.5	F36F12.8	NA	NA	NA	NA	NA	NA	NA	E02H9.3	F42A10.4	R02D3.4	NA	NA	NA	NA	NA	T24C2.2	Y22D7AR.6	W06A11.1	F38A1.5	F32A11.6	C45E1.4	C44E12.3	F53A9.1	H23N18.2	T22B7.4	NA	NA	NA	NA	NA	NA	H04M03.8	F36D1.15	T12D8.5	F19H6.4	NA	NA	NA	NA	NA	NA	Y62F5A.9	F37B12.2	ZK637.10	NA	NA	NA	NA
C01G5.6	F36H1.4	NA	NA	NA	NA	NA	NA	NA	E03A3.2	F42A10.5	R02F11.4	NA	NA	NA	NA	NA	T24C4.2	Y23H5B.3	W06B11.1	F38B2.1	F32A11.7	C45G7.5	C44F1.3	F53A9.7	H24K24.2	T22C1.11	NA	NA	NA	NA	NA	NA	H05B21.3	F36D3.14	T13A10.5	F20D12.2	NA	NA	NA	NA	NA	NA	Y67A10A.6	F37C12.12	ZK637.11	NA	NA	NA	NA
C01G5.7	F36H12.2	NA	NA	NA	NA	NA	NA	NA	E04A4.4	F42A6.8	R03H10.1	NA	NA	NA	NA	NA	T24E12.13	Y23H5B.8	W06F12.2	F38B2.4	F32A5.3	C45G9.11	C44H4.8	F53B1.2	H24K24.5	T22C8.3	NA	NA	NA	NA	NA	NA	H10D12.2	F36D4.4	T14E8.1	F20D12.4	NA	NA	NA	NA	NA	NA	Y69A2AL.1	F37C12.14	ZK662.5	NA	NA	NA	NA
C01G5.8	F37B12.3	NA	NA	NA	NA	NA	NA	NA	E04A4.5	F42A8.2	R04A9.2	NA	NA	NA	NA	NA	T25E12.6	Y32F6B.3	W06F12.3	F38B6.1	F32A6.5	C45G9.14	C45B11.3	F53B1.4	H24O09.2	T22D1.11	NA	NA	NA	NA	NA	NA	H10E21.5	F36F2.1	T16G1.7	F20D6.4	NA	NA	NA	NA	NA	NA	Y69H2.9	F37D6.6	ZK666.1	NA	NA	NA	NA
C01G5.9	F37C12.7	NA	NA	NA	NA	NA	NA	NA	E04D5.1	F42A9.1	R04B3.2	NA	NA	NA	NA	NA	T25G12.2	Y37A1C.1	W08D2.1	F38B6.2	F32B4.5	C45G9.6	C45B11.4	F53B1.8	H37A05.4	T22H2.6	NA	NA	NA	NA	NA	NA	H16O14.1	F36F2.8	T19D12.10	F20G4.3	NA	NA	NA	NA	NA	NA	Y71D11A.5	F37F2.3	ZK666.4	NA	NA	NA	NA
C01G6.1	F37C4.5	NA	NA	NA	NA	NA	NA	NA	E04F6.11	F42A9.8	R04D3.2	NA	NA	NA	NA	NA	T26A5.1	Y37D8A.22	W08E12.8	F38B6.4	F32B4.8	C45G9.8	C45B2.2	F53B2.4	H40L08.1	T23C6.1	NA	NA	NA	NA	NA	NA	H17B01.5	F36G9.7	T19D12.2	F21C3.3	NA	NA	NA	NA	NA	NA	Y71H2AM.14	F38A1.13	ZK673.10	NA	NA	NA	NA
C01G6.2	F38A5.13	NA	NA	NA	NA	NA	NA	NA	E04F6.5	F42E11.1	R04D3.4	NA	NA	NA	NA	NA	T26C11.5	Y37E11AL.5	W09B12.1	F38B6.7	F32B5.2	C46A5.2	C45B2.4	F53B2.8	H40L08.3	T23C6.4	NA	NA	NA	NA	NA	NA	H18N23.2	F36G9.8	T19D12.3	F21C3.4	NA	NA	NA	NA	NA	NA	Y73B6BL.21	F38A5.10	ZK673.5	NA	NA	NA	NA
C01G6.3	F38E1.7	NA	NA	NA	NA	NA	NA	NA	EEED8.1	F42G4.7	R05H5.3	NA	NA	NA	NA	NA	T26C11.6	Y37E3.13	W09H1.6	F38B7.11	F32B5.6	C46A5.3	C45E1.4	F53B3.6	K01C8.8	T23D8.9	NA	NA	NA	NA	NA	NA	H20J04.9	F36H1.10	T19D12.9	F21C3.5	NA	NA	NA	NA	NA	NA	Y73F8A.2	F38A5.14	ZK742.1	NA	NA	NA	NA
C01G6.4	F38E1.9	NA	NA	NA	NA	NA	NA	NA	EEED8.13	F42G8.12	R05H5.4	NA	NA	NA	NA	NA	T26C11.7	Y37F4.8	W10C8.4	F38E11.12	F32D8.1	C46A5.4	C45G9.6	F53B6.1	K01C8.9	T23F6.4	NA	NA	NA	NA	NA	NA	H22D07.1	F36H1.12	T19H12.11	F21D5.1	NA	NA	NA	NA	NA	NA	Y73F8A.35	F38A5.9	ZK742.6	NA	NA	NA	NA
C01G6.5	F38H12.3	NA	NA	NA	NA	NA	NA	NA	EEED8.14	F42G9.1	R06A4.6	NA	NA	NA	NA	NA	T26C11.8	Y38H6A.2	Y102A11A.5	F38E11.4	F32D8.7	C46E1.3	C45G9.8	F53B6.8	K01G5.6	T23G4.1	NA	NA	NA	NA	NA	NA	H27D07.3	F36H5.6	T20B12.1	F21D5.6	NA	NA	NA	NA	NA	NA	Y74E4A.1	F38B2.1	ZK856.11	NA	NA	NA	NA
C01G6.6	F38H4.10	NA	NA	NA	NA	NA	NA	NA	EEED8.3	F43C1.2	R06B10.2	NA	NA	NA	NA	NA	T26C11.9	Y38H6A.5	Y102A11A.9	F38G1.2	F32D8.9	C46F11.1	C46A5.2	F53F10.2	K02A4.1	T23G5.6	NA	NA	NA	NA	NA	NA	H32K16.1	F36H9.4	T20D3.3	F21D5.7	NA	NA	NA	NA	NA	NA	Y75B7AL.2	F38B2.3	ZK899.5	NA	NA	NA	NA
C01G6.7	F38H4.8	NA	NA	NA	NA	NA	NA	NA	EEED8.9	F43D9.3	R07C3.12	NA	NA	NA	NA	NA	T26E3.5	Y38H6C.14	Y105C5A.24	F39B2.8	F32E10.3	C46F9.1	C46A5.3	F53F4.1	K02B12.2	T24A6.20	NA	NA	NA	NA	NA	NA	JC8.2	F37H8.6	T20D4.15	F21F3.6	NA	NA	NA	NA	NA	NA	Y75B8A.5	F38B6.2	NA	NA	NA	NA	NA
C01G6.8	F39B2.11	NA	NA	NA	NA	NA	NA	NA	F01F1.11	F43D9.4	R07C3.15	NA	NA	NA	NA	NA	T26E3.8	Y39A1A.9	Y105C5B.29	F39C12.2	F32H2.11	C46G7.1	C46A5.4	F53G12.11	K02B12.4	T24B8.3	NA	NA	NA	NA	NA	NA	K01A11.2	F38B7.1	T20D4.16	F21F3.7	NA	NA	NA	NA	NA	NA	Y80D3A.4	F38B6.5	NA	NA	NA	NA	NA
C01G6.9	F39B2.2	NA	NA	NA	NA	NA	NA	NA	F01F1.12	F43E2.11	R07C3.6	NA	NA	NA	NA	NA	T26H2.1	Y39A1B.2	Y105E8A.12	F40A3.1	F32H2.8	C46G7.2	C46E1.3	F53H10.2	K02D3.1	T24C12.3	NA	NA	NA	NA	NA	NA	K01C8.10	F38B7.11	T20D4.17	F21G4.2	NA	NA	NA	NA	NA	NA	Y81G3A.4	F38B7.10	NA	NA	NA	NA	NA
C01G8.1	F39B2.4	NA	NA	NA	NA	NA	NA	NA	F01F1.2	F43E2.2	R07C3.8	NA	NA	NA	NA	NA	T26H2.3	Y39B6A.11	Y105E8A.5	F40A3.6	F32H2.9	C46G7.4	C46F11.1	F54A5.3	K02E10.2	T25B9.8	NA	NA	NA	NA	NA	NA	K01C8.9	F38B7.2	T20D4.4	F22B5.10	NA	NA	NA	NA	NA	NA	Y87G2A.4	F38C2.2	NA	NA	NA	NA	NA
C01G8.2	F39B2.5	NA	NA	NA	NA	NA	NA	NA	F01F1.4	F43E2.7	R07C3.9	NA	NA	NA	NA	NA	T26H2.4	Y39H10A.4	Y105E8B.1	F40E10.2	F32H5.7	C46H11.10	C46F4.2	F54B11.4	K02E2.2	T25D10.4	NA	NA	NA	NA	NA	NA	K01D12.4	F38E9.6	T20D4.6	F22D3.1	NA	NA	NA	NA	NA	NA	ZC13.2	F38C2.4	NA	NA	NA	NA	NA
C01G8.3	F39H2.3	NA	NA	NA	NA	NA	NA	NA	F01F1.8	F43E2.8	R07G3.5	NA	NA	NA	NA	NA	T27A10.3	Y39H10A.5	Y106G6G.3	F40E10.3	F33C8.2	C46H11.3	C46F9.1	F54B11.9	K02E7.9	T25G3.4	NA	NA	NA	NA	NA	NA	K01H12.3	F38G1.2	T20G5.4	F22D6.2	NA	NA	NA	NA	NA	NA	ZC13.4	F38E11.12	NA	NA	NA	NA	NA
C01G8.4	F39H2.4	NA	NA	NA	NA	NA	NA	NA	F01G10.1	F43G6.10	R07H5.4	NA	NA	NA	NA	NA	T27C4.4	Y40A1A.1	Y113G7A.14	F40E10.4	F33D11.5	C46H11.7	C46G7.1	F54B8.5	K02F2.6	T26C12.3	NA	NA	NA	NA	NA	NA	K02A2.2	F39C12.4	T20H4.3	F22D6.4	NA	NA	NA	NA	NA	NA	ZC15.5	F38E11.7	NA	NA	NA	NA	NA
C01G8.5	F40A3.3	NA	NA	NA	NA	NA	NA	NA	F01G4.3	F43G6.5	R08C7.9	NA	NA	NA	NA	NA	T27E9.6	Y40B10A.9	Y113G7A.5	F40E10.5	F33D4.1	C46H11.8	C46G7.2	F54C9.7	K02F3.1	T26G10.1	NA	NA	NA	NA	NA	NA	K02A6.2	F39E9.2	T21B10.1	F22E5.17	NA	NA	NA	NA	NA	NA	ZC15.7	F38G1.3	NA	NA	NA	NA	NA
C01G8.6	F40E3.2	NA	NA	NA	NA	NA	NA	NA	F01G4.4	F43G6.7	R09A1.1	NA	NA	NA	NA	NA	T27E9.8	Y40H4A.1	Y11D7A.5	F40F12.4	F33D4.2	C46H11.9	C46G7.4	F54D1.2	K02F6.9	T26H2.2	NA	NA	NA	NA	NA	NA	K02D7.5	F39E9.7	T21C12.3	F22E5.9	NA	NA	NA	NA	NA	NA	ZC250.1	F38H4.3	NA	NA	NA	NA	NA
C01G8.9	F40F12.5	NA	NA	NA	NA	NA	NA	NA	F01G4.6	F43G6.9	R09B3.2	NA	NA	NA	NA	NA	T27F2.1	Y41D4B.6	Y12A6A.2	F40F12.7	F33D4.3	C47A10.1	C46H11.10	F54D1.3	K02G10.1	T26H2.6	NA	NA	NA	NA	NA	NA	K02E2.3	F39G3.1	T21C9.12	F22G12.5	NA	NA	NA	NA	NA	NA	ZC250.3	F39D8.1	NA	NA	NA	NA	NA
C01H6.1	F40F8.1	NA	NA	NA	NA	NA	NA	NA	F02A9.4	F43G9.1	R09B3.4	NA	NA	NA	NA	NA	T27F6.2	Y41D4B.8	Y15E3A.1	F40F4.5	F33D4.6	C47A10.12	C46H11.3	F54D1.4	K02G10.8	T27A1.2	NA	NA	NA	NA	NA	NA	K02E2.7	F39G3.4	T21D12.11	F23A7.8	NA	NA	NA	NA	NA	NA	ZC443.2	F39D8.3	NA	NA	NA	NA	NA
C01H6.2	F40F8.11	NA	NA	NA	NA	NA	NA	NA	F02A9.6	F43G9.13	R09B3.5	NA	NA	NA	NA	NA	T28F12.2	Y41G9A.5	Y16B4A.1	F40F4.6	F33G12.6	C47A10.6	C46H11.7	F54D12.4	K03A1.6	T27A1.3	NA	NA	NA	NA	NA	NA	K02F2.6	F39G3.6	T22E5.2	F23C8.4	NA	NA	NA	NA	NA	NA	ZC449.1	F39D8.4	NA	NA	NA	NA	NA
C01H6.3	F40F9.1	NA	NA	NA	NA	NA	NA	NA	F02D10.6	F44A2.1	R09E12.8	NA	NA	NA	NA	NA	T28H11.4	Y43F8A.5	Y17D7B.10	F40F8.8	F34D10.5	C47A10.8	C46H11.8	F54D12.5	K04B12.2	T27D12.1	NA	NA	NA	NA	NA	NA	K02F6.5	F39H2.1	T22F3.11	F23D12.2	NA	NA	NA	NA	NA	NA	ZC449.2	F39G3.5	NA	NA	NA	NA	NA
C01H6.4	F40F9.7	NA	NA	NA	NA	NA	NA	NA	F02E11.3	F44E2.10	R10D12.9	NA	NA	NA	NA	NA	VH15N14R.1	Y43F8B.9	Y17G9A.4	F40F9.9	F34D10.6	C47A4.2	C46H11.9	F54D12.7	K04C1.3	T28A11.22	NA	NA	NA	NA	NA	NA	K02F6.8	F40A3.2	T22G5.7	F23F1.1	NA	NA	NA	NA	NA	NA	ZC47.13	F39H12.2	NA	NA	NA	NA	NA
C01H6.5	F40G12.11	NA	NA	NA	NA	NA	NA	NA	F02E8.4	F44E2.2	R11.1	NA	NA	NA	NA	NA	W01A11.5	Y43F8C.4	Y18D10A.6	F41B5.6	F34H10.4	C47D2.1	C47A10.1	F54D5.15	K04G11.4	T28C6.10	NA	NA	NA	NA	NA	NA	K03A1.2	F40D4.5	T22H6.5	F23F1.5	NA	NA	NA	NA	NA	NA	ZC487.1	F40A3.1	NA	NA	NA	NA	NA
C01H6.6	F40G9.11	NA	NA	NA	NA	NA	NA	NA	F02E9.4	F44E5.2	R11.4	NA	NA	NA	NA	NA	W02A11.4	Y44E3A.4	Y18D10A.8	F41C6.1	F35A5.1	C47E12.12	C47A10.12	F54E2.3	K04G2.10	T28C6.3	NA	NA	NA	NA	NA	NA	K03A11.5	F40E10.3	T23B3.6	F23F1.8	NA	NA	NA	NA	NA	NA	ZC504.1	F40A3.4	NA	NA	NA	NA	NA
C01H6.7	F40G9.3	NA	NA	NA	NA	NA	NA	NA	F02E9.9	F44E7.5	R11A5.3	NA	NA	NA	NA	NA	W02A11.5	Y45F3A.8	Y18H1A.11	F41D9.1	F35A5.4	C47E12.6	C47A10.6	F54E2.4	K04G2.11	T28F2.2	NA	NA	NA	NA	NA	NA	K03D3.2	F40E10.6	T23F4.3	F23F12.6	NA	NA	NA	NA	NA	NA	ZC8.3	F40E10.2	NA	NA	NA	NA	NA
C01H6.8	F40H3.1	NA	NA	NA	NA	NA	NA	NA	F02H6.2	F44F1.7	R13A1.7	NA	NA	NA	NA	NA	W02D3.11	Y47D3B.5	Y18H1A.12	F41D9.2	F35A5.5	C47E8.3	C47A4.2	F54E4.4	K04H4.6	T28F2.4	NA	NA	NA	NA	NA	NA	K03H1.6	F40F4.8	T23F6.4	F23H11.3	NA	NA	NA	NA	NA	NA	ZK1010.4	F40E10.5	NA	NA	NA	NA	NA
C01H6.9	F41C3.3	NA	NA	NA	NA	NA	NA	NA	F02H6.3	F44G4.4	R151.2	NA	NA	NA	NA	NA	W02D3.9	Y47D9A.1	Y18H1A.14	F41E6.12	F35C11.3	C48B4.12	C47D2.1	F54E7.7	K05C4.9	T28F4.1	NA	NA	NA	NA	NA	NA	K04A8.4	F40F9.2	T23H2.2	F23H11.9	NA	NA	NA	NA	NA	NA	ZK1055.2	F40E12.1	NA	NA	NA	NA	NA
C02A12.1	F41F3.2	NA	NA	NA	NA	NA	NA	NA	F02H6.4	F45B8.2	R17.1	NA	NA	NA	NA	NA	W02H5.4	Y47G6A.17	Y20F4.4	F41E6.7	F35C5.9	C48B4.13	C47E12.6	F54F11.2	K05F1.5	T28H11.4	NA	NA	NA	NA	NA	NA	K04B12.3	F40G12.4	T23H4.2	F23H12.2	NA	NA	NA	NA	NA	NA	ZK1055.4	F40F4.5	NA	NA	NA	NA	NA
C02A12.4	F41H10.10	NA	NA	NA	NA	NA	NA	NA	F07A5.1	F45C12.10	R186.7	NA	NA	NA	NA	NA	W03B1.5	Y47G6A.21	Y27F2A.9	F41E7.1	F35C8.3	C48B4.2	C47E8.3	F54F2.1	K05F6.1	VF39H2L.1	NA	NA	NA	NA	NA	NA	K04C2.7	F40G12.8	T24A11.2	F25B3.6	NA	NA	NA	NA	NA	NA	ZK1055.5	F40F8.10	NA	NA	NA	NA	NA
C02B10.1	F41H10.11	NA	NA	NA	NA	NA	NA	NA	F07H5.10	F45C12.11	R53.4	NA	NA	NA	NA	NA	W03D2.1	Y48B6A.7	Y34B4A.6	F41E7.9	F35C8.5	C48C5.1	C48B4.12	F54G2.1	K05F6.6	VK10D6R.1	NA	NA	NA	NA	NA	NA	K04F1.15	F40H3.1	T24D8.5	F25D7.1	NA	NA	NA	NA	NA	NA	ZK1128.7	F40F8.8	NA	NA	NA	NA	NA
C02B10.2	F41H10.6	NA	NA	NA	NA	NA	NA	NA	F08A8.7	F45C12.15	R53.5	NA	NA	NA	NA	NA	W03D2.2	Y48B6A.8	Y34B4A.9	F41G3.2	F35C8.8	C48D1.3	C48B4.13	F54G8.2	K06A5.4	W02A11.3	NA	NA	NA	NA	NA	NA	K04F10.1	F41B4.1	T24F1.5	F25D7.2	NA	NA	NA	NA	NA	NA	ZK1225.1	F40F9.9	NA	NA	NA	NA	NA
C02B10.3	F42A8.2	NA	NA	NA	NA	NA	NA	NA	F08B4.1	F45D3.1	T01B11.4	NA	NA	NA	NA	NA	W03D2.7	Y48G1BL.6	Y37A1C.1	F41G4.3	F35C8.9	C48D5.1	C48B4.2	F54H12.1	K06C4.11	W02B12.11	NA	NA	NA	NA	NA	NA	K04G2.3	F41B5.2	T25B6.7	F25D7.4	NA	NA	NA	NA	NA	NA	ZK1290.12	F40G12.6	NA	NA	NA	NA	NA
C02B10.4	F42A8.3	NA	NA	NA	NA	NA	NA	NA	F08B4.6	F45D3.5	T01D3.5	NA	NA	NA	NA	NA	W03F9.10	Y48G8AL.15	Y37D8A.6	F41H8.1	F35D11.2	C49A1.10	C48B4.8	F54H5.2	K06C4.3	W02B12.6	NA	NA	NA	NA	NA	NA	K05C4.2	F41B5.3	T25B9.1	F25E5.1	NA	NA	NA	NA	NA	NA	ZK1307.2	F41B5.10	NA	NA	NA	NA	NA
C02B10.5	F42A9.6	NA	NA	NA	NA	NA	NA	NA	F08F3.2	F45H10.2	T01E8.2	NA	NA	NA	NA	NA	W04A8.5	Y48G8AR.1	Y37E3.13	F42A9.9	F35D11.8	C49A9.3	C48C5.1	F54H5.4	K07B1.1	W02B12.8	NA	NA	NA	NA	NA	NA	K06A9.2	F41B5.9	T25G3.3	F25G6.9	NA	NA	NA	NA	NA	NA	ZK1307.5	F41C3.8	NA	NA	NA	NA	NA
C02B10.6	F42A9.8	NA	NA	NA	NA	NA	NA	NA	F08F3.3	F46A9.4	T01G1.2	NA	NA	NA	NA	NA	W04A8.9	Y50C1A.2	Y37E3.5	F42C5.10	F35D2.1	C49A9.4	C48C5.3	F55A11.7	K07B1.6	W03D2.7	NA	NA	NA	NA	NA	NA	K06B9.6	F41C3.2	T26G10.5	F25H2.13	NA	NA	NA	NA	NA	NA	ZK154.1	F41E7.1	NA	NA	NA	NA	NA
C02B4.1	F42G4.7	NA	NA	NA	NA	NA	NA	NA	F08F3.6	F46B6.3	T02G6.5	NA	NA	NA	NA	NA	W04E12.1	Y51A2D.13	Y38E10A.20	F42C5.3	F35D2.5	C49A9.5	C48D1.3	F55A3.7	K07C6.5	W03F8.10	NA	NA	NA	NA	NA	NA	K06C4.1	F41D9.2	T26H10.1	F25H2.4	NA	NA	NA	NA	NA	NA	ZK177.9	F41E7.9	NA	NA	NA	NA	NA
C02B4.2	F42G9.6	NA	NA	NA	NA	NA	NA	NA	F08F3.9	F46B6.5	T02G6.6	NA	NA	NA	NA	NA	W04E12.2	Y51A2D.14	Y38E10A.21	F42G10.2	F35E12.9	C49A9.7	C48E7.5	F55A8.2	K07E3.1	W03F8.5	NA	NA	NA	NA	NA	NA	K06H7.1	F41E6.17	T27A3.1	F25H2.6	NA	NA	NA	NA	NA	NA	ZK265.1	F41F3.3	NA	NA	NA	NA	NA
C02B4.4	F42H11.2	NA	NA	NA	NA	NA	NA	NA	F08F8.4	F47B10.9	T02H6.5	NA	NA	NA	NA	NA	W04E12.7	Y51H7C.12	Y38F1A.2	F42G4.3	F35E8.11	C49A9.9	C49A1.10	F55C12.1	K07E3.2	W03H9.2	NA	NA	NA	NA	NA	NA	K06H7.7	F41E6.2	T27B7.3	F25H2.8	NA	NA	NA	NA	NA	NA	ZK265.8	F41G3.18	NA	NA	NA	NA	NA
C02B8.1	F43C1.2	NA	NA	NA	NA	NA	NA	NA	F08G5.1	F47D2.1	T03D3.5	NA	NA	NA	NA	NA	W04G5.8	Y53C10A.4	Y38F2AL.2	F42G9.9	F35F10.11	C49C3.21	C49A9.3	F55C12.6	K07E3.3	W04A4.6	NA	NA	NA	NA	NA	NA	K07A1.3	F41E7.3	T27B7.4	F25H2.9	NA	NA	NA	NA	NA	NA	ZK370.3	F41G4.1	NA	NA	NA	NA	NA
C02B8.3	F43D9.4	NA	NA	NA	NA	NA	NA	NA	F08H9.1	F47H4.1	T03F1.3	NA	NA	NA	NA	NA	W06A11.2	Y53G8AM.7	Y38H6A.5	F42H10.5	F35G8.1	C49C3.4	C49A9.4	F55E10.5	K07F5.13	W04A8.3	NA	NA	NA	NA	NA	NA	K07A12.1	F41E7.7	T27D12.2	F25H8.1	NA	NA	NA	NA	NA	NA	ZK381.2	F41G4.3	NA	NA	NA	NA	NA
C02B8.4	F43D9.5	NA	NA	NA	NA	NA	NA	NA	F09D1.1	F48A11.4	T03F6.3	NA	NA	NA	NA	NA	W06A11.3	Y53H1B.1	Y38H6C.14	F43B10.2	F35H10.10	C49C8.5	C49A9.6	F55F1.1	K08B12.3	W04A8.5	NA	NA	NA	NA	NA	NA	K07B1.6	F41G3.1	T27F2.2	F25H8.2	NA	NA	NA	NA	NA	NA	ZK470.1	F42A9.11	NA	NA	NA	NA	NA
C02B8.5	F43E2.8	NA	NA	NA	NA	NA	NA	NA	F09E5.1	F48E8.3	T04A11.3	NA	NA	NA	NA	NA	W06D11.2	Y54G2A.10	Y39A1A.9	F43C1.1	F35H10.4	C49F5.4	C49A9.7	F55F1.5	K08B4.4	W05E10.3	NA	NA	NA	NA	NA	NA	K07B1.8	F41G4.8	T27F2.4	F25H9.6	NA	NA	NA	NA	NA	NA	ZK512.11	F42C5.10	NA	NA	NA	NA	NA
C02B8.6	F43G6.10	NA	NA	NA	NA	NA	NA	NA	F09E5.13	F48E8.5	T04A8.10	NA	NA	NA	NA	NA	W06D4.2	Y54G2A.8	Y39A1B.2	F43C11.11	F35H12.1	C49F8.1	C49A9.8	F55F3.3	K08C7.3	W05H12.2	NA	NA	NA	NA	NA	NA	K07C6.11	F41H10.4	T28A11.18	F26A1.1	NA	NA	NA	NA	NA	NA	ZK596.3	F42C5.6	NA	NA	NA	NA	NA
C02C2.1	F43G6.7	NA	NA	NA	NA	NA	NA	NA	F09E5.15	F49C12.15	T04C12.5	NA	NA	NA	NA	NA	W06H3.1	Y54G9A.3	Y39B6A.11	F43C9.3	F35H12.6	C49F8.3	C49A9.9	F56A4.1	K08D10.10	W05H9.1	NA	NA	NA	NA	NA	NA	K07C6.9	F42A10.3	T28A11.19	F26A3.3	NA	NA	NA	NA	NA	NA	ZK643.1	F42E11.4	NA	NA	NA	NA	NA
C02C2.3	F43G9.1	NA	NA	NA	NA	NA	NA	NA	F09E8.3	F49C12.8	T04C12.6	NA	NA	NA	NA	NA	W07E6.1	Y55B1AL.1	Y39B6A.48	F43E2.3	F36A4.10	C49G7.10	C49C3.13	F56A4.5	K08D10.8	W05H9.4	NA	NA	NA	NA	NA	NA	K07D4.4	F42A10.8	T28A11.20	F26A3.7	NA	NA	NA	NA	NA	NA	ZK678.8	F42G8.5	NA	NA	NA	NA	NA
C02C2.4	F43G9.13	NA	NA	NA	NA	NA	NA	NA	F09F7.4	F49E8.2	T04D3.1	NA	NA	NA	NA	NA	W07E6.2	Y55D5A.3	Y39B6A.7	F43E2.9	F36A4.6	C49G7.5	C49C8.5	F56C11.2	K08E3.8	W06B11.2	NA	NA	NA	NA	NA	NA	K07D4.8	F42A8.1	T28C12.1	F26B1.2	NA	NA	NA	NA	NA	NA	ZK682.4	F42G9.8	NA	NA	NA	NA	NA
C02C2.5	F43G9.2	NA	NA	NA	NA	NA	NA	NA	F09G2.2	F49E8.3	T04D3.2	NA	NA	NA	NA	NA	W07E6.4	Y55F3AM.11	Y39E4B.3	F44A2.5	F36D1.8	C49G7.6	C49F5.1	F56C4.3	K08H2.6	W06E11.2	NA	NA	NA	NA	NA	NA	K07E8.5	F42A9.5	T28C12.2	F26E4.1	NA	NA	NA	NA	NA	NA	ZK816.4	F42G9.9	NA	NA	NA	NA	NA
C02C6.1	F43G9.9	NA	NA	NA	NA	NA	NA	NA	F09G2.8	F49E8.4	T05A12.3	NA	NA	NA	NA	NA	W07G1.6	Y55F3BR.4	Y39H10A.4	F44B9.1	F36D3.3	C49G7.7	C49F5.4	F56D12.4	K09A11.1	W06H12.1	NA	NA	NA	NA	NA	NA	K08A2.5	F42A9.9	T28F4.4	F26E4.10	NA	NA	NA	NA	NA	NA	ZK822.3	F43B10.2	NA	NA	NA	NA	NA
C02C6.2	F43H9.3	NA	NA	NA	NA	NA	NA	NA	F09G8.4	F52B11.1	T05E12.10	NA	NA	NA	NA	NA	W08E3.4	Y57E12B.3	Y39H10A.5	F44C8.5	F36D3.6	C49H3.1	C49F5.7	F56D3.1	K09C4.8	W07E6.1	NA	NA	NA	NA	NA	NA	K08F8.1	F42C5.2	T28H11.8	F26E4.11	NA	NA	NA	NA	NA	NA	ZK867.2	F43C9.3	NA	NA	NA	NA	NA
C02C6.3	F44A2.1	NA	NA	NA	NA	NA	NA	NA	F09G8.7	F52B5.2	T05E12.8	NA	NA	NA	NA	NA	W08F4.12	Y57G11A.1	Y40H4A.1	F44C8.7	F36F12.1	C50B6.7	C49F8.1	F56D6.14	K09E3.5	W08E3.2	NA	NA	NA	NA	NA	NA	K08G2.12	F42C5.3	W01B6.3	F26E4.4	NA	NA	NA	NA	NA	NA	ZK970.7	F43D2.4	NA	NA	NA	NA	NA
C02D4.1	F44B9.4	NA	NA	NA	NA	NA	NA	NA	F10B5.2	F52B5.3	T05E7.1	NA	NA	NA	NA	NA	W08F4.2	Y57G11C.17	Y41D4B.16	F44C8.8	F36F12.3	C50B8.4	C49F8.3	F57A8.7	K09F6.8	W08F4.13	NA	NA	NA	NA	NA	NA	K08H10.4	F42C5.4	W02B12.13	F26E4.8	NA	NA	NA	NA	NA	NA	NA	F43G6.8	NA	NA	NA	NA	NA
C02D4.2	F44B9.6	NA	NA	NA	NA	NA	NA	NA	F10B5.8	F52C12.1	T05E7.5	NA	NA	NA	NA	NA	W09D6.1	Y57G11C.22	Y41D4B.17	F44C8.9	F36F12.4	C50B8.6	C49G7.10	F57A8.8	K09H11.1	W09C2.1	NA	NA	NA	NA	NA	NA	K09B11.2	F42D1.4	W02B12.6	F26F2.7	NA	NA	NA	NA	NA	NA	NA	F44A2.5	NA	NA	NA	NA	NA
C02D5.1	F44C4.4	NA	NA	NA	NA	NA	NA	NA	F10C5.2	F52C12.3	T05E8.3	NA	NA	NA	NA	NA	W09G12.1	Y57G11C.24	Y41G9A.1	F44D12.8	F36F2.5	C50C3.5	C49G7.12	F57B1.4	K10B2.1	W09H1.4	NA	NA	NA	NA	NA	NA	K09C8.8	F42G10.2	W02B12.9	F26F4.12	NA	NA	NA	NA	NA	NA	NA	F44A6.4	NA	NA	NA	NA	NA
C02D5.2	F44E7.2	NA	NA	NA	NA	NA	NA	NA	F10D11.1	F52C12.4	T05G5.10	NA	NA	NA	NA	NA	W09G12.4	Y57G11C.32	Y43C5A.7	F44E2.4	F36H2.3	C50C3.9	C49G7.3	F57B10.7	K10B3.5	W10D9.1	NA	NA	NA	NA	NA	NA	K09E4.4	F42G4.3	W02D3.6	F26F4.4	NA	NA	NA	NA	NA	NA	NA	F44B9.2	NA	NA	NA	NA	NA
C02D5.3	F44E7.4	NA	NA	NA	NA	NA	NA	NA	F10D11.2	F52C6.11	T05H10.2	NA	NA	NA	NA	NA	W10C8.2	Y58G8A.1	Y43F8A.3	F44E7.7	F36H2.5	C50D2.2	C49G7.5	F57F10.1	K10C2.4	W10D9.2	NA	NA	NA	NA	NA	NA	K09F6.9	F42G8.11	W02H5.12	F26F4.5	NA	NA	NA	NA	NA	NA	NA	F44C4.2	NA	NA	NA	NA	NA
C02D5.4	F44E7.9	NA	NA	NA	NA	NA	NA	NA	F10D7.5	F52C6.2	T05H10.4	NA	NA	NA	NA	NA	Y105C5A.11	Y65B4BR.2	Y43F8A.5	F45B8.4	F36H9.5	C50D2.4	C49G7.6	F57F5.2	K10C9.1	Y102A11A.6	NA	NA	NA	NA	NA	NA	K09H11.10	F42G9.4	W03F8.3	F26G1.1	NA	NA	NA	NA	NA	NA	NA	F44C8.1	NA	NA	NA	NA	NA
C02E11.1	F44F4.2	NA	NA	NA	NA	NA	NA	NA	F10E7.2	F52C9.7	T05H10.5	NA	NA	NA	NA	NA	Y105C5B.11	Y67A10A.9	Y43F8B.4	F45E1.1	F37A4.6	C50E3.6	C49G9.2	F57F5.5	K10C9.3	Y102A11A.8	NA	NA	NA	NA	NA	NA	K09H9.5	F43D2.6	W03G1.5	F26G5.1	NA	NA	NA	NA	NA	NA	NA	F44C8.2	NA	NA	NA	NA	NA
C02E7.1	F45B8.2	NA	NA	NA	NA	NA	NA	NA	F10E9.3	F52D2.4	T05H10.6	NA	NA	NA	NA	NA	Y105C5B.13	Y69E1A.5	Y43F8C.4	F45E10.1	F37A4.7	C50F2.4	C49H3.12	F57G8.1	K10C9.6	Y105C5A.1272	NA	NA	NA	NA	NA	NA	K10C3.5	F43E2.7	W04G3.12	F26H11.6	NA	NA	NA	NA	NA	NA	NA	F44C8.4	NA	NA	NA	NA	NA
C02E7.10	F45C12.2	NA	NA	NA	NA	NA	NA	NA	F10E9.5	F52D2.6	T06E6.13	NA	NA	NA	NA	NA	Y105C5B.1413	Y69E1A.6	Y46C8AL.9	F46B6.11	F37B12.1	C50F2.7	C50B6.7	F57G9.7	K10D6.4	Y105C5B.13	NA	NA	NA	NA	NA	NA	K10C8.2	F43G9.3	W05B10.5	F26H9.1	NA	NA	NA	NA	NA	NA	NA	F44C8.7	NA	NA	NA	NA	NA
C02E7.4	F45D11.9	NA	NA	NA	NA	NA	NA	NA	F10E9.7	F52E1.1	T06E6.2	NA	NA	NA	NA	NA	Y105C5B.15	Y71F9AL.11	Y46G5A.10	F46B6.8	F37B12.2	C50F4.1	C50B8.4	F58A3.3	K10G6.3	Y105C5B.9	NA	NA	NA	NA	NA	NA	K10C8.4	F43H9.1	W05F2.5	F26H9.5	NA	NA	NA	NA	NA	NA	NA	F44C8.8	NA	NA	NA	NA	NA
C02E7.5	F45D3.5	NA	NA	NA	NA	NA	NA	NA	F10G2.2	F52E4.1	T07C4.6	NA	NA	NA	NA	NA	Y105C5B.8	Y71F9AR.1	Y47D3B.5	F46C3.3	F37D6.6	C50F4.9	C50C3.5	F58A4.7	K10G9.3	Y105E8B.7	NA	NA	NA	NA	NA	NA	K10C9.8	F44A2.3	W05G11.2	F27C8.6	NA	NA	NA	NA	NA	NA	NA	F44C8.9	NA	NA	NA	NA	NA
C02E7.6	F45E12.2	NA	NA	NA	NA	NA	NA	NA	F10G7.8	F52F12.3	T08B1.6	NA	NA	NA	NA	NA	Y106G6D.1	Y71F9AR.2	Y47G6A.17	F46E10.10	F38A1.1	C50F7.1	C50D2.1	F58B6.2	K10H10.3	Y106G6D.2	NA	NA	NA	NA	NA	NA	K10D3.1	F44A2.7	W06D12.2	F27D4.1	NA	NA	NA	NA	NA	NA	NA	F44D12.2	NA	NA	NA	NA	NA
C02E7.7	F45F2.10	NA	NA	NA	NA	NA	NA	NA	F10G8.3	F52G2.1	T08B2.5	NA	NA	NA	NA	NA	Y106G6D.2	Y71H2AM.19	Y47G6A.5	F46F11.3	F38A1.14	C50F7.6	C50D2.2	F58F9.4	K11C4.4	Y110A7A.19	NA	NA	NA	NA	NA	NA	K10D3.6	F44E7.2	W06D12.5	F27D4.8	NA	NA	NA	NA	NA	NA	NA	F44F4.1	NA	NA	NA	NA	NA
C02E7.8	F45F2.11	NA	NA	NA	NA	NA	NA	NA	F10G8.7	F52G2.2	T08B6.1	NA	NA	NA	NA	NA	Y106G6H.13	Y71H2AM.8	Y48B6A.4	F46F6.4	F38B2.1	C50H11.13	C50F2.7	F58G1.6	K11G12.4	Y111B2A.27	NA	NA	NA	NA	NA	NA	K10D6.1	F44E7.7	W06G6.1	F28B3.5	NA	NA	NA	NA	NA	NA	NA	F44F4.5	NA	NA	NA	NA	NA
C02F12.1	F45H11.3	NA	NA	NA	NA	NA	NA	NA	F11A10.1	F52H2.5	T08B6.5	NA	NA	NA	NA	NA	Y106G6H.2	Y71H2B.4	Y48B6A.7	F46G10.2	F38B2.2	C50H11.15	C50F4.1	F58G4.1	K11G12.6	Y113G7B.11	NA	NA	NA	NA	NA	NA	K10F12.6	F44E7.8	W06H3.3	F28B3.6	NA	NA	NA	NA	NA	NA	NA	F44G4.7	NA	NA	NA	NA	NA
C02F12.10	F46B6.3	NA	NA	NA	NA	NA	NA	NA	F11A10.3	F53A2.2	T08B6.6	NA	NA	NA	NA	NA	Y106G6H.9	Y73F8A.5	Y48B6A.8	F46G10.5	F38B2.3	C50H11.4	C50F4.13	F58G6.5	K11G9.1	Y113G7B.16	NA	NA	NA	NA	NA	NA	K11D12.9	F44F4.4	W07E11.1	F28B3.7	NA	NA	NA	NA	NA	NA	NA	F45B8.3	NA	NA	NA	NA	NA
C02F12.3	F46B6.5	NA	NA	NA	NA	NA	NA	NA	F11A10.5	F53A2.6	T08D10.1	NA	NA	NA	NA	NA	Y110A2AL.1	Y74C9A.5	Y48B6A.9	F46G10.7	F38B6.1	C50H2.2	C50F4.9	F58H12.1	K12D12.1	Y119C1B.5	NA	NA	NA	NA	NA	NA	K11D9.2	F44G3.1	W07E11.3	F28B3.8	NA	NA	NA	NA	NA	NA	NA	F45E1.1	NA	NA	NA	NA	NA
C02F12.4	F46C5.9	NA	NA	NA	NA	NA	NA	NA	F11A10.8	F53A2.7	T09F5.12	NA	NA	NA	NA	NA	Y111B2A.18	Y75B7AL.2	Y48G8AL.15	F46G11.2	F38B6.2	C50H2.3	C50F7.1	F59A1.11	K12H6.1	Y11D7A.19	NA	NA	NA	NA	NA	NA	K12D9.3	F44G3.12	W10G11.2	F28B3.9	NA	NA	NA	NA	NA	NA	NA	F45E1.2	NA	NA	NA	NA	NA
C02F12.5	F46F11.10	NA	NA	NA	NA	NA	NA	NA	F11A3.2	F53A3.2	T10B10.3	NA	NA	NA	NA	NA	Y113G7B.18	Y75B8A.12	Y48G8AR.1	F46H5.5	F38B6.4	C51E3.1	C50F7.5	F59A3.10	K12H6.11	Y11D7A.3	NA	NA	NA	NA	NA	NA	K12D9.7	F44G3.5	Y104H12D.3	F28C10.3	NA	NA	NA	NA	NA	NA	NA	F45E1.6	NA	NA	NA	NA	NA
C02F12.7	F46F11.2	NA	NA	NA	NA	NA	NA	NA	F11A5.9	F53B7.3	T11F8.1	NA	NA	NA	NA	NA	Y113G7B.4	Y7A5A.1	Y49E10.23	F46H5.7	F38B6.5	C51E3.5	C50H11.4	F59A6.10	K12H6.6	Y17G9B.1	NA	NA	NA	NA	NA	NA	K12G11.4	F45D11.14	Y105C5A.15	F28C6.3	NA	NA	NA	NA	NA	NA	NA	F45E4.3	NA	NA	NA	NA	NA
C02F12.8	F46F11.8	NA	NA	NA	NA	NA	NA	NA	F11G11.2	F53C3.2	T11F9.11	NA	NA	NA	NA	NA	Y113G7B.8	Y9C9A.5	Y51A2D.13	F47A4.1	F38B6.7	C51E3.7	C50H2.10	F59A7.2	K12H6.7	Y17G9B.7	NA	NA	NA	NA	NA	NA	M01A10.2	F45D11.15	Y105E8A.12	F28F8.4	NA	NA	NA	NA	NA	NA	NA	F45E4.4	NA	NA	NA	NA	NA
C02F4.1	F46F3.4	NA	NA	NA	NA	NA	NA	NA	F11G11.5	F53F1.2	T11G6.8	NA	NA	NA	NA	NA	Y116A8B.1	ZC101.3	Y51A2D.14	F47A4.3	F38B7.10	C51E3.9	C50H2.2	F59A7.5	M01D1.1	Y17G9B.8	NA	NA	NA	NA	NA	NA	M01B12.5	F45D11.16	Y10G11A.3	F28F8.5	NA	NA	NA	NA	NA	NA	NA	F45E4.5	NA	NA	NA	NA	NA
C02F4.2	F46H6.1	NA	NA	NA	NA	NA	NA	NA	F11G11.7	F53F8.3	T12A2.3	NA	NA	NA	NA	NA	Y116A8C.17	ZC123.3	Y51A2D.18	F47B10.2	F38B7.11	C52A11.2	C50H2.3	F59B1.3	M01D1.10	Y17G9B.9	NA	NA	NA	NA	NA	NA	M01B2.13	F45D3.4	Y110A7A.16	F28F8.6	NA	NA	NA	NA	NA	NA	NA	F45G2.2	NA	NA	NA	NA	NA
C02F4.4	F47A4.5	NA	NA	NA	NA	NA	NA	NA	F12E12.1	F53F8.5	T13B5.6	NA	NA	NA	NA	NA	Y116A8C.19	ZC123.4	Y51A2D.19	F47B7.2	F38E11.4	C52A11.4	C51E3.1	F59B1.9	M01D1.3	Y18D10A.4	NA	NA	NA	NA	NA	NA	M01B2.3	F45H11.6	Y110A7A.19	F28H1.3	NA	NA	NA	NA	NA	NA	NA	F45H7.4	NA	NA	NA	NA	NA
C02F5.1	F47D12.9	NA	NA	NA	NA	NA	NA	NA	F13A7.10	F53H1.3	T13F2.7	NA	NA	NA	NA	NA	Y116A8C.20	ZC13.2	Y51B9A.6	F47B8.5	F38E11.7	C52B9.10	C51E3.10	F59D12.1	M01D1.7	Y20C6A.4	NA	NA	NA	NA	NA	NA	M01B2.4	F46B3.17	Y110A7A.21	F29A7.6	NA	NA	NA	NA	NA	NA	NA	F46B3.23	NA	NA	NA	NA	NA
C02F5.10	F47G9.1	NA	NA	NA	NA	NA	NA	NA	F13B12.1	F54A3.3	T14G10.8	NA	NA	NA	NA	NA	Y116A8C.22	ZC190.4	Y51F10.7	F47D12.1	F38H4.3	C52B9.11	C51E3.7	F59D6.3	M01D1.9	Y20F4.5	NA	NA	NA	NA	NA	NA	M01F1.1	F46B6.11	Y113G7A.11	F29B9.6	NA	NA	NA	NA	NA	NA	NA	F46B3.7	NA	NA	NA	NA	NA
C02F5.11	F48A11.4	NA	NA	NA	NA	NA	NA	NA	F13D12.5	F54A5.1	T14G8.2	NA	NA	NA	NA	NA	Y116A8C.32	ZC190.5	Y51H4A.7	F47E1.3	F39D8.3	C52B9.3	C51E3.9	H02F09.3	M02A10.3	Y22F5A.1	NA	NA	NA	NA	NA	NA	M01G12.12	F46B6.12	Y113G7A.13	F29C12.3	NA	NA	NA	NA	NA	NA	NA	F46B6.2	NA	NA	NA	NA	NA
C02F5.12	F48C1.6	NA	NA	NA	NA	NA	NA	NA	F13E6.3	F54C4.1	T15H9.4	NA	NA	NA	NA	NA	Y116A8C.33	ZC328.3	Y52B11A.4	F47F2.3	F40A3.6	C52B9.5	C52A11.2	H03A11.2	M02D8.3	Y23H5B.1	NA	NA	NA	NA	NA	NA	M01H9.3	F46B6.4	Y113G7B.14	F29C4.1	NA	NA	NA	NA	NA	NA	NA	F46C5.2	NA	NA	NA	NA	NA
C02F5.13	F48E8.6	NA	NA	NA	NA	NA	NA	NA	F13E9.1	F54C4.2	T15H9.5	NA	NA	NA	NA	NA	Y116A8C.34	ZC373.4	Y53C10A.4	F47G3.1	F40E10.3	C52B9.6	C52B11.3	H04M03.2	M03A8.2	Y23H5B.7	NA	NA	NA	NA	NA	NA	M02B7.3	F46C8.2	Y113G7B.17	F29G9.2	NA	NA	NA	NA	NA	NA	NA	F46C8.1	NA	NA	NA	NA	NA
C02F5.14	F48E8.7	NA	NA	NA	NA	NA	NA	NA	F13G3.4	F54C4.3	T15H9.6	NA	NA	NA	NA	NA	Y116A8C.35	ZC443.1	Y53F4B.2	F47G4.5	F40E10.4	C52B9.9	C52B9.1	H05G16.1	M03B6.4	Y27F2A.8	NA	NA	NA	NA	NA	NA	M02B7.6	F46E10.8	Y11D7A.3	F30A10.3	NA	NA	NA	NA	NA	NA	NA	F46C8.8	NA	NA	NA	NA	NA
C02F5.2	F49E8.2	NA	NA	NA	NA	NA	NA	NA	F13G3.5	F54D10.5	T16G12.4	NA	NA	NA	NA	NA	Y116A8C.4	ZC449.5	Y53F4B.33	F47G6.4	F40E10.5	C52D10.11	C52B9.10	H06A10.1	M04B2.1	Y37A1B.5	NA	NA	NA	NA	NA	NA	M02E1.1	F46F3.2	Y15E3A.4	F30B5.4	NA	NA	NA	NA	NA	NA	NA	F46F11.3	NA	NA	NA	NA	NA
C02F5.3	F49E8.7	NA	NA	NA	NA	NA	NA	NA	F13H10.2	F54D10.9	T16G12.8	NA	NA	NA	NA	NA	Y116A8C.5	ZC477.9	Y53F4B.39	F47G9.3	F40E3.6	C52E12.3	C52B9.11	H10D18.5	M04B2.4	Y37E11B.2	NA	NA	NA	NA	NA	NA	M02H5.12	F46H5.6	Y17G9B.8	F30F8.1	NA	NA	NA	NA	NA	NA	NA	F46F11.5	NA	NA	NA	NA	NA
C02F5.4	F49H12.6	NA	NA	NA	NA	NA	NA	NA	F13H10.3	F54D12.5	T16H12.11	NA	NA	NA	NA	NA	Y116F11A.1	ZC64.4	Y53G8AM.7	F48A11.1	F40F12.4	C52E4.1	C52B9.3	H10E21.3	M04F3.2	Y37E3.16	NA	NA	NA	NA	NA	NA	M03B6.5	F46H6.1	Y19D10A.5	F30F8.10	NA	NA	NA	NA	NA	NA	NA	F46F2.2	NA	NA	NA	NA	NA
C02F5.5	F52A8.6	NA	NA	NA	NA	NA	NA	NA	F13H10.4	F54D12.6	T16H12.4	NA	NA	NA	NA	NA	Y13C8A.2	ZC84.1	Y53G8AR.7	F48A9.1	F40F4.5	C53A5.13	C52B9.5	H11E01.3	M05B5.4	Y38F1A.5	NA	NA	NA	NA	NA	NA	M04B2.2	F47B10.5	Y23B4A.2	F30F8.3	NA	NA	NA	NA	NA	NA	NA	F46F6.4	NA	NA	NA	NA	NA
C02F5.6	F52B5.2	NA	NA	NA	NA	NA	NA	NA	F14B4.2	F54D5.11	T17A3.1	NA	NA	NA	NA	NA	Y19D10A.1	ZC84.7	Y54F10AM.1	F48A9.2	F40F4.6	C53A5.5	C52B9.6	H14E04.3	M05B5.5	Y39A1A.15	NA	NA	NA	NA	NA	NA	M04B2.7	F47B10.8	Y32B12A.1	F31B9.3	NA	NA	NA	NA	NA	NA	NA	F46G11.1	NA	NA	NA	NA	NA
C02F5.7	F52B5.3	NA	NA	NA	NA	NA	NA	NA	F14D2.1	F54D5.12	T17A3.3	NA	NA	NA	NA	NA	Y19D10A.11	ZK1067.6	Y54F10AM.6	F48D6.3	F40F8.5	C53A5.9	C52B9.9	H16O14.1	M05D6.7	Y39G10AR.10	NA	NA	NA	NA	NA	NA	M04C3.1	F47B10.9	Y32H12A.1	F31C3.2	NA	NA	NA	NA	NA	NA	NA	F46G11.3	NA	NA	NA	NA	NA
C02F5.8	F52C12.2	NA	NA	NA	NA	NA	NA	NA	F14D2.11	F54D7.2	T17A3.4	NA	NA	NA	NA	NA	Y19D10B.2	ZK112.7	Y54G2A.10	F48E3.1	F40F9.9	C53B4.1	C52D10.11	H19J13.1	M110.4	Y39G10AR.11	NA	NA	NA	NA	NA	NA	M04C9.2	F47B8.13	Y34F4.3	F31C3.4	NA	NA	NA	NA	NA	NA	NA	F46G11.4	NA	NA	NA	NA	NA
C02F5.9	F52C12.3	NA	NA	NA	NA	NA	NA	NA	F14D2.12	F54E7.5	T17A3.6	NA	NA	NA	NA	NA	Y19D2B.2	ZK1193.5	Y54G2A.14	F48E3.8	F41B5.4	C53B4.8	C52E12.3	H19M22.2	M116.1	Y39G10AR.5	NA	NA	NA	NA	NA	NA	M04G12.1	F47B8.14	Y34F4.5	F31C3.5	NA	NA	NA	NA	NA	NA	NA	F46H5.5	NA	NA	NA	NA	NA
C02G6.1	F52C6.2	NA	NA	NA	NA	NA	NA	NA	F14D2.13	F54F7.6	T17A3.7	NA	NA	NA	NA	NA	Y20C6A.2	ZK262.2	Y54G2A.25	F48E8.1	F41B5.6	C53C7.1	C52E4.1	H21P03.3	M116.4	Y40B1B.3	NA	NA	NA	NA	NA	NA	M04G7.3	F47B8.4	Y37D8A.15	F31D4.9	NA	NA	NA	NA	NA	NA	NA	F47A4.1	NA	NA	NA	NA	NA
C02G6.2	F52E1.1	NA	NA	NA	NA	NA	NA	NA	F14D2.15	F55A11.4	T17A3.9	NA	NA	NA	NA	NA	Y24F12A.3	ZK287.1	Y54G2A.26	F48F7.7	F41C6.5	C53C9.3	C53A5.13	H23L24.4	M117.4	Y41D4A.3	NA	NA	NA	NA	NA	NA	M05D6.5	F47B8.5	Y37D8A.2	F31E3.4	NA	NA	NA	NA	NA	NA	NA	F47A4.5	NA	NA	NA	NA	NA
C02G6.3	F52E1.10	NA	NA	NA	NA	NA	NA	NA	F14D2.2	F55A3.3	T18D3.1	NA	NA	NA	NA	NA	Y25C1A.6	ZK328.7	Y54G2A.35	F49A5.5	F41D9.1	C53D6.3	C53A5.5	H25P06.1	M142.4	Y41D4B.9	NA	NA	NA	NA	NA	NA	M116.2	F47B8.6	Y37H2C.1	F31F6.1	NA	NA	NA	NA	NA	NA	NA	F47B3.3	NA	NA	NA	NA	NA
C02H6.2	F52E1.13	NA	NA	NA	NA	NA	NA	NA	F14D2.4	F55A8.1	T19B10.4	NA	NA	NA	NA	NA	Y27F2A.6	ZK418.7	Y54G2A.4	F49A5.7	F41D9.2	C53D6.7	C53A5.9	H27D07.5	M151.1	Y42H9AR.4	NA	NA	NA	NA	NA	NA	M162.3	F47D2.7	Y38E10A.20	F31F6.2	NA	NA	NA	NA	NA	NA	NA	F47D12.1	NA	NA	NA	NA	NA
C02H7.1	F52F12.4	NA	NA	NA	NA	NA	NA	NA	F14D7.2	F55A8.2	T19C3.1	NA	NA	NA	NA	NA	Y32F6A.1	ZK455.5	Y54G2A.45	F49C12.1	F41E6.12	C53D6.8	C53B4.1	H32K16.1	M151.5	Y43F4B.7	NA	NA	NA	NA	NA	NA	M162.5	F47F2.1	Y38E10A.21	F31F6.3	NA	NA	NA	NA	NA	NA	NA	F47D12.3	NA	NA	NA	NA	NA
C02H7.2	F52G2.1	NA	NA	NA	NA	NA	NA	NA	F14H3.3	F55B12.3	T19C3.5	NA	NA	NA	NA	NA	Y32H12A.3	ZK520.3	Y54G2A.8	F49C12.3	F41E7.5	C54A12.1	C53C9.2	H32K16.2	M151.8	Y43F8C.13	NA	NA	NA	NA	NA	NA	M162.8	F47G3.4	Y38E10A.7	F32A11.1	NA	NA	NA	NA	NA	NA	NA	F47F2.3	NA	NA	NA	NA	NA
C02H7.3	F52H3.4	NA	NA	NA	NA	NA	NA	NA	F14H3.4	F55C5.10	T19H12.2	NA	NA	NA	NA	NA	Y37A1B.1	ZK6.6	Y55B1AL.1	F49E10.1	F41E7.9	C54A12.2	C53C9.3	H34I24.2	M153.1	Y43F8C.7	NA	NA	NA	NA	NA	NA	M18.3	F47G4.3	Y38F2AL.5	F32A11.2	NA	NA	NA	NA	NA	NA	NA	F47G4.5	NA	NA	NA	NA	NA
C03A3.1	F53A2.4	NA	NA	NA	NA	NA	NA	NA	F14H3.5	F55C9.1	T20B12.8	NA	NA	NA	NA	NA	Y37E11AL.9	ZK643.10	Y55B1BL.1	F49E10.2	F41F3.8	C54A12.4	C53D6.3	H37A05.1	M163.4	Y45G5AM.5	NA	NA	NA	NA	NA	NA	M18.5	F47H4.10	Y38F2AR.12	F32A5.7	NA	NA	NA	NA	NA	NA	NA	F48A11.2	NA	NA	NA	NA	NA
C03A3.2	F53A2.5	NA	NA	NA	NA	NA	NA	NA	F14H3.6	F55C9.14	T20D4.6	NA	NA	NA	NA	NA	Y37E11AR.2	ZK669.1	Y55F3AM.11	F49E10.4	F41G4.5	C54C6.5	C53D6.7	H39E20.1	M18.7	Y46B2A.1	NA	NA	NA	NA	NA	NA	M18.6	F47H4.2	Y38H6C.17	F32A7.4	NA	NA	NA	NA	NA	NA	NA	F48A9.2	NA	NA	NA	NA	NA
C03A3.3	F53A2.8	NA	NA	NA	NA	NA	NA	NA	F15B10.2	F55F8.9	T20F7.7	NA	NA	NA	NA	NA	Y37E11AR.5	ZK669.7	Y55F3AM.14	F49E10.5	F41H8.1	C54C6.6	C54A12.1	H39E23.3	M57.1	Y46D2A.1	NA	NA	NA	NA	NA	NA	MTCE.23	F47H4.8	Y39A3B.5	F32B6.3	NA	NA	NA	NA	NA	NA	NA	F48B9.5	NA	NA	NA	NA	NA
C03A7.10	F53C11.5	NA	NA	NA	NA	NA	NA	NA	F15B9.10	F55G1.4	T20H4.4	NA	NA	NA	NA	NA	Y38C1AA.12	ZK678.8	Y55F3BR.2	F49E11.3	F42C5.4	C54C8.11	C54A12.2	K01A6.8	M7.5	Y46G5A.19	NA	NA	NA	NA	NA	NA	PAR2.3	F47H4.9	Y39C12A.7	F32D1.6	NA	NA	NA	NA	NA	NA	NA	F48C5.2	NA	NA	NA	NA	NA
C03A7.11	F53E4.1	NA	NA	NA	NA	NA	NA	NA	F15B9.4	F55G1.5	T21C12.4	NA	NA	NA	NA	NA	Y38C1AA.2	ZK688.8	Y55F3C.4	F49E12.10	F42E8.1	C54D10.1	C54A12.4	K01B6.4	R02C2.6	Y46G5A.7	NA	NA	NA	NA	NA	NA	R02C2.3	F48A9.1	Y39H10A.1	F32D1.7	NA	NA	NA	NA	NA	NA	NA	F48E3.2	NA	NA	NA	NA	NA
C03A7.12	F53F10.3	NA	NA	NA	NA	NA	NA	NA	F15D3.6	F55G1.6	T21C12.8	NA	NA	NA	NA	NA	Y38E10A.14	ZK822.1	Y55F3C.7	F49E12.8	F42G9.9	C54D10.3	C54C6.5	K02A6.2	R02D3.1	Y47D3A.1	NA	NA	NA	NA	NA	NA	R02C2.4	F48B9.4	Y40B10A.7	F32D8.14	NA	NA	NA	NA	NA	NA	NA	F48E3.7	NA	NA	NA	NA	NA
C03A7.13	F53F10.8	NA	NA	NA	NA	NA	NA	NA	F15E6.1	F55G1.7	T21C9.1	NA	NA	NA	NA	NA	Y38E10A.16	ZK836.1	Y56A3A.6	F49E2.2	F42H10.5	C54D10.5	C54C8.11	K02B2.3	R03A10.3	Y47D3A.25	NA	NA	NA	NA	NA	NA	R02E12.2	F48C5.1	Y40B10B.1	F32D8.5	NA	NA	NA	NA	NA	NA	NA	F48F5.6	NA	NA	NA	NA	NA
C03A7.14	F53F4.12	NA	NA	NA	NA	NA	NA	NA	F15H10.3	F55G1.9	T21G5.3	NA	NA	NA	NA	NA	Y38E10A.28	ZK867.1	Y57A10A.24	F49F1.6	F43C11.11	C54D10.9	C54D1.2	K02B7.4	R03E1.2	Y47D3B.11	NA	NA	NA	NA	NA	NA	R03D7.1	F48D6.4	Y40H7A.2	F32E10.1	NA	NA	NA	NA	NA	NA	NA	F48F7.2	NA	NA	NA	NA	NA
C03A7.2	F53F4.3	NA	NA	NA	NA	NA	NA	NA	F16A11.1	F56A3.1	T22B2.1	NA	NA	NA	NA	NA	Y38E10A.3	ZK945.1	Y57A10B.1	F49H6.11	F43C9.3	C54D2.1	C54D10.1	K02C4.2	R03G5.2	Y47G6A.6	NA	NA	NA	NA	NA	NA	R03E1.3	F48G7.2	Y41D4B.11	F32H2.1	NA	NA	NA	NA	NA	NA	NA	F48F7.5	NA	NA	NA	NA	NA
C03A7.3	F53F8.5	NA	NA	NA	NA	NA	NA	NA	F16A11.3	F56A4.12	T22B2.2	NA	NA	NA	NA	NA	Y39A1A.16	NA	Y57E12B.3	F52B5.1	F43D2.4	C54D2.2	C54D10.3	K02C4.5	R03H10.1	Y47G6A.7	NA	NA	NA	NA	NA	NA	R03E9.1	F48G7.7	Y41D4B.24	F32H2.10	NA	NA	NA	NA	NA	NA	NA	F49B2.6	NA	NA	NA	NA	NA
C03A7.4	F53G12.13	NA	NA	NA	NA	NA	NA	NA	F16H11.3	F56A6.4	T22C1.4	NA	NA	NA	NA	NA	Y39A1A.17	NA	Y57G11C.24	F52C9.5	F44A2.5	C54D2.4	C54D10.5	K02D10.4	R04A9.2	Y48A6B.9	NA	NA	NA	NA	NA	NA	R03E9.3	F49E11.6	Y41D4B.27	F32H2.3	NA	NA	NA	NA	NA	NA	NA	F49C12.12	NA	NA	NA	NA	NA
C03A7.5	F53G12.5	NA	NA	NA	NA	NA	NA	NA	F18A1.7	F56A8.4	T22C8.4	NA	NA	NA	NA	NA	Y39G10AL.1	NA	Y57G7A.6	F52D10.6	F44A6.5	C54E10.2	C54D10.7	K02D7.4	R04A9.4	Y48A6C.5	NA	NA	NA	NA	NA	NA	R03E9.4	F49E11.9	Y41G9A.3	F33A8.5	NA	NA	NA	NA	NA	NA	NA	F49C12.13	NA	NA	NA	NA	NA
C03A7.7	F53H1.3	NA	NA	NA	NA	NA	NA	NA	F18A1.8	F56A8.5	T22F3.4	NA	NA	NA	NA	NA	Y39G10AR.10	NA	Y58G8A.1	F52E1.13	F44B9.1	C54E10.5	C54D2.1	K02E2.1	R04A9.6	Y48A6C.6	NA	NA	NA	NA	NA	NA	R03G5.2	F49H12.4	Y42A5A.1	F33D11.11	NA	NA	NA	NA	NA	NA	NA	F49D11.3	NA	NA	NA	NA	NA
C03A7.8	F53H4.1	NA	NA	NA	NA	NA	NA	NA	F18A11.1	F56A8.6	T22G5.3	NA	NA	NA	NA	NA	Y39H10A.1	NA	Y5H2B.5	F52E4.4	F44C4.2	C54E4.3	C54D2.2	K02F3.4	R04A9.7	Y48B6A.6	NA	NA	NA	NA	NA	NA	R03H4.2	F52E1.9	Y43F4B.7	F33D11.12	NA	NA	NA	NA	NA	NA	NA	F49E10.4	NA	NA	NA	NA	NA
C03B1.10	F54C8.2	NA	NA	NA	NA	NA	NA	NA	F18C5.2	F56A8.8	T22H9.2	NA	NA	NA	NA	NA	Y40A1A.2	NA	Y65B4A.2	F52E4.6	F44G4.7	C54F6.3	C54D2.4	K02H11.3	R04A9.9	Y48G1C.12	NA	NA	NA	NA	NA	NA	R03H4.3	F52H3.7	Y43F8A.3	F33D4.5	NA	NA	NA	NA	NA	NA	NA	F49E12.12	NA	NA	NA	NA	NA
C03B1.12	F54C8.5	NA	NA	NA	NA	NA	NA	NA	F18E2.2	F56B3.4	T23B3.1	NA	NA	NA	NA	NA	Y41D4B.14	NA	Y65B4BL.1	F52F10.2	F45B8.3	C54F6.5	C54E10.2	K02H8.1	R04B3.2	Y48G1C.6	NA	NA	NA	NA	NA	NA	R04A9.3	F53A9.10	Y43F8A.5	F33D4.7	NA	NA	NA	NA	NA	NA	NA	F49E2.2	NA	NA	NA	NA	NA
C03B1.13	F54C9.6	NA	NA	NA	NA	NA	NA	NA	F19B10.2	F56B3.8	T23C6.3	NA	NA	NA	NA	NA	Y42H9AR.2	NA	Y65B4BR.2	F52F10.4	F45E4.3	C54G4.1	C54F6.14	K03A11.4	R04B5.5	Y48G9A.4	NA	NA	NA	NA	NA	NA	R04E5.7	F53B6.8	Y45G12C.1	F33D4.8	NA	NA	NA	NA	NA	NA	NA	F49F1.14	NA	NA	NA	NA	NA
C03B1.14	F54C9.8	NA	NA	NA	NA	NA	NA	NA	F19B10.5	F56C3.6	T23D8.5	NA	NA	NA	NA	NA	Y43B11AL.1	NA	Y67A10A.6	F52G3.5	F45E4.4	C54G4.4	C54F6.3	K03E6.7	R04E5.9	Y49A10A.2	NA	NA	NA	NA	NA	NA	R04E5.8	F53B7.2	Y46E12A.2	F33E11.2	NA	NA	NA	NA	NA	NA	NA	F49F1.6	NA	NA	NA	NA	NA
C03B1.2	F54D10.5	NA	NA	NA	NA	NA	NA	NA	F19B10.8	F56D12.6	T23G5.2	NA	NA	NA	NA	NA	Y43D4A.6	NA	Y67A10A.7	F52H2.4	F45G2.2	C54G4.5	C54F6.5	K03H6.6	R05D11.1	Y49F6B.2	NA	NA	NA	NA	NA	NA	R05A10.4	F53C11.9	Y46G5A.15	F33E11.3	NA	NA	NA	NA	NA	NA	NA	F49H12.3	NA	NA	NA	NA	NA
C03B1.5	F54D10.7	NA	NA	NA	NA	NA	NA	NA	F19B6.1	F56D2.1	T23H2.5	NA	NA	NA	NA	NA	Y43F11A.1	NA	Y67A10A.9	F52H3.7	F45H7.4	C54G4.6	C54F6.6	K03H9.3	R05D3.2	Y49F6C.3	NA	NA	NA	NA	NA	NA	R05C11.1	F53E10.2	Y46H3A.1	F33G12.2	NA	NA	NA	NA	NA	NA	NA	F52A8.4	NA	NA	NA	NA	NA
C03B1.7	F54D12.4	NA	NA	NA	NA	NA	NA	NA	F19B6.2	F56F11.4	T24B8.6	NA	NA	NA	NA	NA	Y43F11A.4	NA	Y70C5C.1	F53A9.4	F46B3.5	C54G4.7	C54G4.1	K04A8.2	R06A4.2	Y49F6C.4	NA	NA	NA	NA	NA	NA	R05D3.12	F53F4.4	Y47D3B.2	F33G12.7	NA	NA	NA	NA	NA	NA	NA	F52B5.1	NA	NA	NA	NA	NA
C03B8.2	F54D12.5	NA	NA	NA	NA	NA	NA	NA	F19D8.2	F56F3.1	T24C2.2	NA	NA	NA	NA	NA	Y43F8C.9	NA	Y71F9AL.10	F53A9.9	F46B3.7	C54G6.3	C54G4.5	K04C2.5	R06A4.8	Y51H4A.1	NA	NA	NA	NA	NA	NA	R05F9.1	F53F4.7	Y47H9C.1	F33H1.2	NA	NA	NA	NA	NA	NA	NA	F52D1.2	NA	NA	NA	NA	NA
C03B8.3	F54D12.6	NA	NA	NA	NA	NA	NA	NA	F19F10.11	F56F4.1	T24C4.1	NA	NA	NA	NA	NA	Y44A6C.2	NA	Y71G12B.16	F53B1.3	F46C3.2	C54G7.1	C54G4.7	K04F1.10	R06C7.8	Y51H7C.9	NA	NA	NA	NA	NA	NA	R05F9.11	F53F8.2	Y47H9C.10	F33H1.3	NA	NA	NA	NA	NA	NA	NA	F52D1.3	NA	NA	NA	NA	NA
C03B8.4	F54D5.14	NA	NA	NA	NA	NA	NA	NA	F19F10.12	F56G4.4	T24E12.11	NA	NA	NA	NA	NA	Y44E3A.6	NA	Y71G12B.18	F53B3.2	F46C5.2	C54H2.4	C54G6.3	K04F1.4	R07B1.12	Y53C12B.1	NA	NA	NA	NA	NA	NA	R06B9.1	F53G12.7	Y48A6B.7	F33H1.4	NA	NA	NA	NA	NA	NA	NA	F52D10.6	NA	NA	NA	NA	NA
C03C10.1	F54D5.2	NA	NA	NA	NA	NA	NA	NA	F19H6.4	F56H1.4	T24H10.1	NA	NA	NA	NA	NA	Y45F10D.11	NA	Y71G12B.31	F53B3.6	F46C5.7	C55A1.12	C54H2.4	K04F1.9	R07B5.9	Y53G8AM.8	NA	NA	NA	NA	NA	NA	R06C1.6	F54B11.2	Y48A6B.8	F33H2.2	NA	NA	NA	NA	NA	NA	NA	F52G3.5	NA	NA	NA	NA	NA
C03C10.2	F54D5.7	NA	NA	NA	NA	NA	NA	NA	F20A1.2	F56H1.5	T24H7.2	NA	NA	NA	NA	NA	Y46E12A.4	NA	Y71H10B.1	F53B6.2	F46C8.5	C55A1.6	C54H2.5	K05B2.5	R07C3.1	Y53G8B.1	NA	NA	NA	NA	NA	NA	R06C7.3	F54B8.4	Y48A6B.9	F34D10.4	NA	NA	NA	NA	NA	NA	NA	F52H2.4	NA	NA	NA	NA	NA
C03C10.3	F54D5.9	NA	NA	NA	NA	NA	NA	NA	F20A1.9	F56H1.6	T25E12.6	NA	NA	NA	NA	NA	Y46G5A.24	NA	Y71H2B.4	F53C11.2	F46C8.8	C55A6.12	C55A1.12	K05D4.3	R07C3.12	Y54E5B.2	NA	NA	NA	NA	NA	NA	R07E5.10	F54C9.7	Y48D7A.2	F35C11.5	NA	NA	NA	NA	NA	NA	NA	F53A10.2	NA	NA	NA	NA	NA
C03C10.4	F54E7.3	NA	NA	NA	NA	NA	NA	NA	F20C5.3	F56H1.7	T25G12.2	NA	NA	NA	NA	NA	Y46G5A.27	NA	Y71H2B.7	F53F4.4	F46F11.3	C55A6.3	C55A6.12	K05G3.1	R07C3.13	Y54G11A.11	NA	NA	NA	NA	NA	NA	R08A2.7	F54F12.2	Y48E1B.11	F35C8.7	NA	NA	NA	NA	NA	NA	NA	F53A2.1	NA	NA	NA	NA	NA
C03C10.5	F54F2.5	NA	NA	NA	NA	NA	NA	NA	F20D12.1	F56H11.4	T26A5.3	NA	NA	NA	NA	NA	Y46G5A.28	NA	Y73B6BL.31	F53F4.5	F46F2.5	C55A6.4	C55A6.3	K06A9.1	R07C3.15	Y54G11A.5	NA	NA	NA	NA	NA	NA	R08B4.5	F54F7.2	Y48E1B.16	F35G12.10	NA	NA	NA	NA	NA	NA	NA	F53A9.3	NA	NA	NA	NA	NA
C03C10.7	F54F2.8	NA	NA	NA	NA	NA	NA	NA	F20D12.2	F56H6.2	T26A5.5	NA	NA	NA	NA	NA	Y46G5A.39	NA	Y73B6BL.39	F53F4.6	F46F3.2	C55A6.7	C55A6.4	K06A9.2	R07C3.2	Y54G11A.6	NA	NA	NA	NA	NA	NA	R08D7.2	F55A11.6	Y48G9A.7	F35G12.3	NA	NA	NA	NA	NA	NA	NA	F53B1.2	NA	NA	NA	NA	NA
C03C10.9	F54F7.5	NA	NA	NA	NA	NA	NA	NA	F20D12.4	F57A10.3	T26A5.8	NA	NA	NA	NA	NA	Y46H3A.1	NA	Y73E7A.8	F53G12.3	F46G11.1	C55C2.5	C55C2.5	K06B4.8	R07C3.5	Y54G2A.21	NA	NA	NA	NA	NA	NA	R08D7.6	F55A8.2	Y50D7A.5	F35G12.7	NA	NA	NA	NA	NA	NA	NA	F53B1.3	NA	NA	NA	NA	NA
C03C11.1	F54H12.1	NA	NA	NA	NA	NA	NA	NA	F20D6.4	F57A10.4	T26A5.9	NA	NA	NA	NA	NA	Y47D3A.12	NA	Y73F8A.5	F53G12.4	F47A4.1	C55F2.1	C55F2.1	K06B9.5	R07C3.7	Y54G2A.36	NA	NA	NA	NA	NA	NA	R08H2.2	F55C12.4	Y50E8A.16	F35H10.5	NA	NA	NA	NA	NA	NA	NA	F53B1.4	NA	NA	NA	NA	NA
C03C11.2	F55A11.1	NA	NA	NA	NA	NA	NA	NA	F20G4.3	F57B1.2	T26C11.5	NA	NA	NA	NA	NA	Y47D3A.13	NA	Y75B8A.12	F53H4.5	F47A4.5	C55F2.2	C55F2.2	K07A9.2	R07D5.2	Y55B1BR.3	NA	NA	NA	NA	NA	NA	R09A1.5	F55C5.3	Y51A2A.11	F35H10.6	NA	NA	NA	NA	NA	NA	NA	F53B1.9	NA	NA	NA	NA	NA
C03D6.1	F55A11.3	NA	NA	NA	NA	NA	NA	NA	F20H11.3	F57B10.11	T26C11.6	NA	NA	NA	NA	NA	Y47D3A.31	NA	Y75B8A.35	F54C1.5	F47B7.4	C56A3.2	C56A3.2	K07D4.6	R07H5.4	Y55D5A.6	NA	NA	NA	NA	NA	NA	R09A8.3	F55F3.3	Y51A2A.7	F35H10.7	NA	NA	NA	NA	NA	NA	NA	F53B6.1	NA	NA	NA	NA	NA
C03D6.3	F55A11.7	NA	NA	NA	NA	NA	NA	NA	F21A3.5	F57B10.12	T26C11.7	NA	NA	NA	NA	NA	Y47D7A.1	NA	Y76A2B.2	F54D8.4	F47B8.9	C56A3.3	C56A3.3	K07D8.1	R08C7.13	Y55F3C.9	NA	NA	NA	NA	NA	NA	R09B5.11	F55G1.7	Y51A2B.8	F35H8.3	NA	NA	NA	NA	NA	NA	NA	F53B6.2	NA	NA	NA	NA	NA
C03D6.4	F55A12.10	NA	NA	NA	NA	NA	NA	NA	F21C3.3	F57B10.14	T26C11.8	NA	NA	NA	NA	NA	Y47D7A.8	NA	Y77E11A.11	F54F11.1	F47C10.7	C56C10.4	C56A3.6	K07E1.1	R08C7.9	Y57A10C.1	NA	NA	NA	NA	NA	NA	R09H10.7	F55H12.4	Y51A2D.10	F36A2.13	NA	NA	NA	NA	NA	NA	NA	F53C11.3	NA	NA	NA	NA	NA
C03D6.5	F55A12.5	NA	NA	NA	NA	NA	NA	NA	F21C3.4	F57B10.4	T26C11.9	NA	NA	NA	NA	NA	Y47G6A.13	NA	Y7A5A.1	F54F11.2	F47C10.8	C56C10.6	C56C10.3	K07E12.1	R08F11.1	Y57G11C.13	NA	NA	NA	NA	NA	NA	R107.4	F55H2.5	Y51A2D.13	F36A2.8	NA	NA	NA	NA	NA	NA	NA	F53C11.4	NA	NA	NA	NA	NA
C03D6.6	F55C5.5	NA	NA	NA	NA	NA	NA	NA	F21C3.5	F57B10.6	T26E3.5	NA	NA	NA	NA	NA	Y47G6A.31	NA	Y7A5A.10	F54F12.2	F47D12.1	C56E10.1	C56C10.4	K07F5.17	R09H10.3	Y59A8B.10	NA	NA	NA	NA	NA	NA	R10D12.17	F56A4.11	Y51A2D.5	F36A2.9	NA	NA	NA	NA	NA	NA	NA	F53C11.6	NA	NA	NA	NA	NA
C03D6.8	F55G1.6	NA	NA	NA	NA	NA	NA	NA	F21D5.1	F57B9.10	T26E3.8	NA	NA	NA	NA	NA	Y47G6A.7	NA	Y80D3A.7	F54F7.4	F47F2.3	C56E10.3	C56C10.6	K07G5.4	R107.8	Y59C2A.3	NA	NA	NA	NA	NA	NA	R10E8.8	F56A4.7	Y53C12B.1	F36F12.8	NA	NA	NA	NA	NA	NA	NA	F53E10.1	NA	NA	NA	NA	NA
C03E10.3	F55G1.7	NA	NA	NA	NA	NA	NA	NA	F21D5.2	F57C2.1	T26H2.3	NA	NA	NA	NA	NA	Y47H10A.1	NA	Y82E9BL.14	F54G2.1	F47F6.3	C56G3.1	C56E10.1	K07H8.7	R10D12.9	Y62E10A.11	NA	NA	NA	NA	NA	NA	R10E9.1	F56B3.10	Y53C12B.7	F36F2.3	NA	NA	NA	NA	NA	NA	NA	F53F1.5	NA	NA	NA	NA	NA
C03E10.4	F55G1.8	NA	NA	NA	NA	NA	NA	NA	F21D5.6	F57C2.3	T27A10.3	NA	NA	NA	NA	NA	Y47H10A.2	NA	Y87G2A.19	F54G8.2	F47G3.1	CC4.2	C56E10.3	K08D8.11	R10E11.7	Y63D3A.2	NA	NA	NA	NA	NA	NA	R10H10.7	F56B3.7	Y53F4B.12	F36F2.6	NA	NA	NA	NA	NA	NA	NA	F53F10.4	NA	NA	NA	NA	NA
C03E10.5	F55H2.7	NA	NA	NA	NA	NA	NA	NA	F21F3.3	F57C2.5	T27E9.1	NA	NA	NA	NA	NA	Y47H9B.2	NA	Y97E10AR.2	F54G8.4	F47G4.5	CC8.1	C56G3.1	K08D8.12	R10E12.2	Y65A5A.1	NA	NA	NA	NA	NA	NA	R11.3	F56C3.9	Y54G2A.50	F36H1.4	NA	NA	NA	NA	NA	NA	NA	F53F4.6	NA	NA	NA	NA	NA
C03E10.6	F56A11.5	NA	NA	NA	NA	NA	NA	NA	F21F3.4	F57C2.6	T27E9.6	NA	NA	NA	NA	NA	Y48D7A.1	NA	Y9C2UA.1	F54G8.5	F47G6.4	CC8.3	C56G7.3	K08D8.3	R10E4.1	Y69F12A.2	NA	NA	NA	NA	NA	NA	R119.4	F56C4.4	Y54H5A.1	F37A4.1	NA	NA	NA	NA	NA	NA	NA	F53F8.7	NA	NA	NA	NA	NA
C03F11.1	F56B3.12	NA	NA	NA	NA	NA	NA	NA	F21F3.6	F57C9.5	T27E9.8	NA	NA	NA	NA	NA	Y48G1C.6	NA	Y9C2UA.2	F54H12.1	F47G9.3	CD4.1	CC4.2	K08D8.9	R10E4.6	Y71A12B.15	NA	NA	NA	NA	NA	NA	R11F4.1	F56F11.2	Y54H5A.4	F37A4.2	NA	NA	NA	NA	NA	NA	NA	F53G12.11	NA	NA	NA	NA	NA
C03F11.2	F56B3.8	NA	NA	NA	NA	NA	NA	NA	F21F3.7	F57C9.7	T28A8.3	NA	NA	NA	NA	NA	Y49C4A.6	NA	ZC123.3	F54H5.4	F48A11.1	D1005.4	CC8.1	K08E3.1	R11.1	Y71F9AL.6	NA	NA	NA	NA	NA	NA	R11F4.2	F56F4.5	Y55B1BM.1	F37A4.9	NA	NA	NA	NA	NA	NA	NA	F53G12.9	NA	NA	NA	NA	NA
C03F11.3	F56C11.5	NA	NA	NA	NA	NA	NA	NA	F21G4.2	F57G4.8	T28A8.5	NA	NA	NA	NA	NA	Y49C4A.8	NA	ZC13.2	F55A4.2	F48A11.2	D1005.6	CC8.3	K08E5.2	R11.4	Y71F9AL.7	NA	NA	NA	NA	NA	NA	R11G11.1	F56H11.1	Y56A3A.30	F37B12.3	NA	NA	NA	NA	NA	NA	NA	F54A5.3	NA	NA	NA	NA	NA
C03F11.4	F56C9.11	NA	NA	NA	NA	NA	NA	NA	F21H12.5	F58A4.10	T28C6.3	NA	NA	NA	NA	NA	Y49C4A.9	NA	ZC132.3	F55B12.1	F48A9.1	D1007.13	cTel3X.1	K08E7.5	R11A5.3	Y71F9B.8	NA	NA	NA	NA	NA	NA	R12B2.1	F56H6.8	Y57A10A.27	F37C12.1	NA	NA	NA	NA	NA	NA	NA	F54B3.4	NA	NA	NA	NA	NA
C03G5.1	F56C9.3	NA	NA	NA	NA	NA	NA	NA	F22B7.6	F58A4.2	T28D6.6	NA	NA	NA	NA	NA	Y49F6A.1	NA	ZC250.4	F55D10.5	F48A9.2	D1007.3	D1005.3	K08H10.1	R11E3.2	Y71G12B.20	NA	NA	NA	NA	NA	NA	R134.1	F56H9.3	Y58A7A.6	F37C12.2	NA	NA	NA	NA	NA	NA	NA	F54B8.1	NA	NA	NA	NA	NA
C03G5.10	F56C9.6	NA	NA	NA	NA	NA	NA	NA	F22D6.2	F58A4.8	T28D9.10	NA	NA	NA	NA	NA	Y49F6B.3	NA	ZC262.5	F55D12.2	F48C1.1	D1009.4	D1005.6	K08H10.2	R11E3.4	Y71G12B.7	NA	NA	NA	NA	NA	NA	R13A1.8	F56H9.8	Y58G8A.4	F37C12.3	NA	NA	NA	NA	NA	NA	NA	F54C1.6	NA	NA	NA	NA	NA
C03G5.11	F56D1.1	NA	NA	NA	NA	NA	NA	NA	F22D6.3	F58B3.7	T28D9.11	NA	NA	NA	NA	NA	Y49F6B.5	NA	ZC334.7	F55D12.5	F48E8.1	D1014.5	D1007.13	K09A9.6	R11E3.6	Y71H2AM.17	NA	NA	NA	NA	NA	NA	R13A5.12	F57A8.7	Y59A8B.19	F37C12.7	NA	NA	NA	NA	NA	NA	NA	F54C8.7	NA	NA	NA	NA	NA
C03G5.12	F56D1.2	NA	NA	NA	NA	NA	NA	NA	F22D6.4	F58D5.7	T28D9.2	NA	NA	NA	NA	NA	Y49F6B.7	NA	ZC374.2	F55E10.6	F49C12.3	D1014.7	D1007.14	K09E10.2	R11G11.1	Y73B6BL.21	NA	NA	NA	NA	NA	NA	R13H4.5	F57B1.5	Y59A8B.21	F37D6.1	NA	NA	NA	NA	NA	NA	NA	F54D5.15	NA	NA	NA	NA	NA
C03G5.13	F56D1.3	NA	NA	NA	NA	NA	NA	NA	F22D6.5	F58E1.10	VC5.5	NA	NA	NA	NA	NA	Y50D4C.2	NA	ZC412.1	F55F1.1	F49C12.5	D1022.6	D1007.18	K09E4.4	R12C12.8	Y73B6BL.24	NA	NA	NA	NA	NA	NA	R13H7.2	F57B10.9	Y59A8B.26	F37D6.2	NA	NA	NA	NA	NA	NA	NA	F54D7.3	NA	NA	NA	NA	NA
C03G5.2	F56D1.7	NA	NA	NA	NA	NA	NA	NA	F22D6.6	F58E1.13	W02A11.4	NA	NA	NA	NA	NA	Y50E8A.11	NA	ZC443.1	F55F1.5	F49C5.4	D1022.8	D1007.3	K09F5.3	R12H7.5	Y73B6BL.36	NA	NA	NA	NA	NA	NA	R13H8.1	F57B7.1	Y5H2A.2	F38A5.13	NA	NA	NA	NA	NA	NA	NA	F54D8.4	NA	NA	NA	NA	NA
C03G5.7	F56D2.7	NA	NA	NA	NA	NA	NA	NA	F22E5.17	F58E10.3	W02B12.2	NA	NA	NA	NA	NA	Y51B9A.3	NA	ZC449.2	F55F3.3	F49D11.2	D1022.9	D1009.4	K09F5.4	R13A5.5	Y73B6BL.9	NA	NA	NA	NA	NA	NA	R166.5	F57B9.3	Y60A3A.8	F38E1.7	NA	NA	NA	NA	NA	NA	NA	F54E2.3	NA	NA	NA	NA	NA
C03G5.8	F56H1.4	NA	NA	NA	NA	NA	NA	NA	F22E5.9	F58E10.5	W02D3.11	NA	NA	NA	NA	NA	Y51B9A.4	NA	ZC449.5	F55G11.1	F49D11.3	D1025.4	D1014.7	K09F6.6	R13G10.1	Y75B8A.1	NA	NA	NA	NA	NA	NA	R53.7	F57B9.4	Y61A9LA.10	F38E1.9	NA	NA	NA	NA	NA	NA	NA	F54E2.4	NA	NA	NA	NA	NA
C03G5.9	F56H1.7	NA	NA	NA	NA	NA	NA	NA	F22F7.7	F58E10.7	W03B1.5	NA	NA	NA	NA	NA	Y51H1A.1	NA	ZC487.1	F55G11.8	F49E10.4	D1025.6	D1022.6	K09H9.5	R13G10.2	Y75B8A.13	NA	NA	NA	NA	NA	NA	R74.1	F57C12.6	Y61A9LA.4	F38H12.3	NA	NA	NA	NA	NA	NA	NA	F54E4.4	NA	NA	NA	NA	NA
C03G6.10	F56H11.4	NA	NA	NA	NA	NA	NA	NA	F22G12.4	F58E6.6	W03D2.1	NA	NA	NA	NA	NA	Y51H4A.15	NA	ZC84.6	F55H12.3	F49E10.5	D1025.8	D1022.8	K10B3.7	R166.4	Y75B8A.18	NA	NA	NA	NA	NA	NA	T01B11.2	F57E7.1	Y66H1A.5	F38H4.10	NA	NA	NA	NA	NA	NA	NA	F54E7.6	NA	NA	NA	NA	NA
C03G6.12	F57A10.3	NA	NA	NA	NA	NA	NA	NA	F22G12.5	F58E6.8	W03D2.2	NA	NA	NA	NA	NA	Y51H7BR.1	NA	ZC84.7	F55H2.1	F49E11.3	D1044.3	D1022.9	K10B3.9	R52.1	Y75B8A.19	NA	NA	NA	NA	NA	NA	T01B7.5	F57F10.1	Y67A10A.10	F38H4.7	NA	NA	NA	NA	NA	NA	NA	F54F2.1	NA	NA	NA	NA	NA
C03G6.13	F57A10.4	NA	NA	NA	NA	NA	NA	NA	F23B12.4	F58F12.1	W03D2.4	NA	NA	NA	NA	NA	Y51H7BR.2	NA	ZK1073.2	F56A6.1	F49E12.12	D1044.8	D1025.4	K10B4.4	R52.6	Y75B8A.2	NA	NA	NA	NA	NA	NA	T01C4.4	F57F5.4	Y69A2AR.4	F38H4.8	NA	NA	NA	NA	NA	NA	NA	F54F2.9	NA	NA	NA	NA	NA
C03G6.15	F57B1.2	NA	NA	NA	NA	NA	NA	NA	F23B12.5	F58G1.1	W03D2.7	NA	NA	NA	NA	NA	Y51H7C.15	NA	ZK112.3	F56A8.1	F49H6.11	D1046.4	D1025.6	K10B4.5	R52.7	Y77E11A.10	NA	NA	NA	NA	NA	NA	T01G6.6	F57H12.4	Y69H2.10	F38H4.9	NA	NA	NA	NA	NA	NA	NA	F54G8.2	NA	NA	NA	NA	NA
C03G6.16	F57B10.12	NA	NA	NA	NA	NA	NA	NA	F23B12.6	F58G1.2	W04A8.3	NA	NA	NA	NA	NA	Y53F4B.24	NA	ZK112.6	F56B3.2	F52A8.4	D1046.5	D1025.8	K10C2.1	R52.8	Y7A9D.1	NA	NA	NA	NA	NA	NA	T01G6.9	F58A3.3	Y6E2A.4	F39B2.11	NA	NA	NA	NA	NA	NA	NA	F54H5.4	NA	NA	NA	NA	NA
C03G6.17	F57B10.7	NA	NA	NA	NA	NA	NA	NA	F23B2.6	F58G4.4	W04A8.5	NA	NA	NA	NA	NA	Y53F4B.43	NA	ZK1240.2	F56C11.6	F52B5.1	D1054.8	D1025.9	K10D11.5	R52.9	Y82E9BR.1	NA	NA	NA	NA	NA	NA	T01H10.1	F58A3.4	Y71G12B.2	F39B2.2	NA	NA	NA	NA	NA	NA	NA	F55A12.7	NA	NA	NA	NA	NA
C03G6.19	F57C2.2	NA	NA	NA	NA	NA	NA	NA	F23C8.5	F59A3.9	W04A8.9	NA	NA	NA	NA	NA	Y54E2A.11	NA	ZK1307.7	F56C9.8	F52D1.3	D1069.1	D1044.3	K10F12.7	T01B11.2	Y82E9BR.14	NA	NA	NA	NA	NA	NA	T01H8.5	F58A3.5	Y73C8C.4	F39B2.3	NA	NA	NA	NA	NA	NA	NA	F55A3.6	NA	NA	NA	NA	NA
C03G6.2	F57C2.6	NA	NA	NA	NA	NA	NA	NA	F23C8.6	F59B1.10	W04E12.1	NA	NA	NA	NA	NA	Y54E5A.6	NA	ZK177.11	F56D12.4	F52D10.6	D1073.1	D1044.8	K10G9.2	T01C8.5	Y82E9BR.17	NA	NA	NA	NA	NA	NA	T02B11.6	F58B3.8	Y73E7A.3	F39B2.4	NA	NA	NA	NA	NA	NA	NA	F55A4.2	NA	NA	NA	NA	NA
C03G6.3	F57C9.4	NA	NA	NA	NA	NA	NA	NA	F23D12.10	F59B1.8	W04E12.2	NA	NA	NA	NA	NA	Y54F10BM.6	NA	ZK262.2	F56D2.3	F52E4.6	D1081.4	D1046.4	K10H10.1	T01H10.8	Y87G2A.17	NA	NA	NA	NA	NA	NA	T02D1.6	F58B4.1	Y75B8A.32	F39B2.5	NA	NA	NA	NA	NA	NA	NA	F55A4.3	NA	NA	NA	NA	NA
C03G6.5	F57C9.7	NA	NA	NA	NA	NA	NA	NA	F23D12.2	F59C6.5	W04E12.7	NA	NA	NA	NA	NA	Y55B1AR.3	NA	ZK287.1	F56D3.1	F52G3.5	D1086.8	D1046.5	K10H10.10	T01H8.2	Y87G2A.2	NA	NA	NA	NA	NA	NA	T02E9.1	F58E2.3	Y76A2B.6	F39H11.1	NA	NA	NA	NA	NA	NA	NA	F55A4.7	NA	NA	NA	NA	NA
C03G6.6	F58A4.2	NA	NA	NA	NA	NA	NA	NA	F23F1.1	F59D6.5	W04G3.5	NA	NA	NA	NA	NA	Y55B1BR.3	NA	ZK470.2	F56D5.6	F53A9.3	D2005.2	D1053.3	K10H10.13	T02C1.1	Y92H12BR.4	NA	NA	NA	NA	NA	NA	T02E9.3	F58H1.4	Y7A9A.1	F39H11.5	NA	NA	NA	NA	NA	NA	NA	F55C10.5	NA	NA	NA	NA	NA
C03G6.8	F58A4.6	NA	NA	NA	NA	NA	NA	NA	F23F1.5	F59E10.1	W05H7.4	NA	NA	NA	NA	NA	Y55B1BR.4	NA	ZK563.2	F56F10.1	F53B1.2	D2007.1	D1054.8	K10H10.4	T02G5.14	Y94H6A.5	NA	NA	NA	NA	NA	NA	T02G5.6	F58H7.3	Y80D3A.10	F39H2.2	NA	NA	NA	NA	NA	NA	NA	F55C7.2	NA	NA	NA	NA	NA
C03H12.1	F58B3.5	NA	NA	NA	NA	NA	NA	NA	F23F1.8	F59G1.5	W06A11.2	NA	NA	NA	NA	NA	Y55F3C.2	NA	ZK6.7	F56F10.2	F53B1.4	D2007.2	D1054.9	K11C4.5	T02G6.11	ZC132.6	NA	NA	NA	NA	NA	NA	T03D3.4	F59A6.10	Y82E9BL.17	F39H2.3	NA	NA	NA	NA	NA	NA	NA	F55D12.5	NA	NA	NA	NA	NA
C03H5.1	F58B3.6	NA	NA	NA	NA	NA	NA	NA	F23F12.6	F59H5.1	W06A11.3	NA	NA	NA	NA	NA	Y56A3A.10	NA	ZK6.8	F56F11.5	F53B3.2	D2007.3	D1065.4	K11D12.1	T02G6.4	ZC155.7	NA	NA	NA	NA	NA	NA	T03E6.4	F59B1.9	Y82E9BL.7	F40E3.2	NA	NA	NA	NA	NA	NA	NA	F55F1.1	NA	NA	NA	NA	NA
C03H5.2	F58B6.3	NA	NA	NA	NA	NA	NA	NA	F23H11.3	F59H6.9	W06D11.2	NA	NA	NA	NA	NA	Y56A3A.14	NA	ZK643.1	F56F3.5	F53B7.5	D2021.2	D1073.1	K11E8.1	T02G6.6	ZC250.2	NA	NA	NA	NA	NA	NA	T03G11.1	F59B10.4	Y82E9BR.13	F40F11.3	NA	NA	NA	NA	NA	NA	NA	F55F1.3	NA	NA	NA	NA	NA
C03H5.3	F58D5.4	NA	NA	NA	NA	NA	NA	NA	F23H11.9	H04D03.2	W06D4.2	NA	NA	NA	NA	NA	Y56A3A.15	NA	ZK673.11	F56H1.1	F53C11.6	D2023.1	D1079.1	K11G9.2	T03F1.9	ZC373.1	NA	NA	NA	NA	NA	NA	T04A11.9	F59B8.1	Y82E9BR.23	F40F11.4	NA	NA	NA	NA	NA	NA	NA	F55F1.5	NA	NA	NA	NA	NA
C03H5.4	F58E10.1	NA	NA	NA	NA	NA	NA	NA	F23H12.2	H04D03.6	W06H3.1	NA	NA	NA	NA	NA	Y56A3A.33	NA	ZK795.1	F56H11.1	F53F1.5	D2023.3	D1081.4	K11G9.6	T04A11.3	ZC373.5	NA	NA	NA	NA	NA	NA	T04A6.1	F59E11.15	Y82E9BR.6	F40F8.1	NA	NA	NA	NA	NA	NA	NA	F55F8.8	NA	NA	NA	NA	NA
C03H5.5	F58G1.1	NA	NA	NA	NA	NA	NA	NA	F25B3.1	H04M03.3	W08E12.1	NA	NA	NA	NA	NA	Y57A10A.9	NA	ZK813.6	F56H11.2	F53F1.6	D2023.9	D1086.8	K11H12.9	T04A8.14	ZC376.1	NA	NA	NA	NA	NA	NA	T04A8.4	F59F5.2	Y95B8A.6	F40F8.11	NA	NA	NA	NA	NA	NA	NA	F55G1.1	NA	NA	NA	NA	NA
C03H5.6	F58G1.2	NA	NA	NA	NA	NA	NA	NA	F25B3.6	H06H21.3	W08F4.12	NA	NA	NA	NA	NA	Y57A10B.5	NA	ZK816.4	F56H9.6	F53F4.15	D2024.2	D2005.2	K12B6.11	T04B8.2	ZC376.3	NA	NA	NA	NA	NA	NA	T04C12.3	F59F5.4	Y97E10B.2	F40F8.9	NA	NA	NA	NA	NA	NA	NA	F55G1.15	NA	NA	NA	NA	NA
C03H5.7	F58G11.1	NA	NA	NA	NA	NA	NA	NA	F25B4.7	H06H21.6	W08F4.2	NA	NA	NA	NA	NA	Y57A10B.6	NA	ZK822.1	F57B10.3	F53F4.4	D2024.3	D2007.2	K12C11.3	T04B8.3	ZC434.5	NA	NA	NA	NA	NA	NA	T04C9.1	H01G02.3	Y97E10B.9	F40F9.1	NA	NA	NA	NA	NA	NA	NA	F56A6.2	NA	NA	NA	NA	NA
C04A11.1	F58G11.6	NA	NA	NA	NA	NA	NA	NA	F25B5.3	H11E01.2	W09B7.2	NA	NA	NA	NA	NA	Y57A10C.1	NA	ZK836.1	F57B7.1	F53F4.5	D2024.4	D2007.3	K12D9.5	T04D1.2	ZC434.6	NA	NA	NA	NA	NA	NA	T04F3.1	H03A11.1	Y9C2UA.1	F40G12.11	NA	NA	NA	NA	NA	NA	NA	F56A8.1	NA	NA	NA	NA	NA
C04A11.2	F59A2.1	NA	NA	NA	NA	NA	NA	NA	F25B5.6	H11L12.1	W09G12.1	NA	NA	NA	NA	NA	Y57A10C.11	NA	ZK892.5	F57B7.2	F53F4.6	D2024.7	D2013.1	K12F2.1	T04D3.2	ZC455.5	NA	NA	NA	NA	NA	NA	T05B4.1	H04M03.12	ZC190.4	F40G9.11	NA	NA	NA	NA	NA	NA	NA	F56A8.7	NA	NA	NA	NA	NA
C04A11.3	F59A3.12	NA	NA	NA	NA	NA	NA	NA	F25D1.1	H12D21.1	W09G12.4	NA	NA	NA	NA	NA	Y57G11C.1134	NA	NA	F57B9.9	F53G12.3	D2030.10	D2021.2	K12F2.2	T05A7.3	ZC84.3	NA	NA	NA	NA	NA	NA	T05B4.2	H05L03.3	ZC196.2	F40G9.2	NA	NA	NA	NA	NA	NA	NA	F56C11.1	NA	NA	NA	NA	NA
C04A11.4	F59A3.2	NA	NA	NA	NA	NA	NA	NA	F25D7.2	H12D21.13	Y102A5C.18	NA	NA	NA	NA	NA	Y57G11C.25	NA	NA	F57C12.5	F53H10.2	D2045.8	D2023.1	LLC1.3	T05A7.4	ZK1053.4	NA	NA	NA	NA	NA	NA	T05B9.2	H06A10.1	ZC21.6	F40G9.3	NA	NA	NA	NA	NA	NA	NA	F56C11.2	NA	NA	NA	NA	NA
C04A11.5	F59A3.4	NA	NA	NA	NA	NA	NA	NA	F25D7.4	H12D21.14	Y105C5B.13	NA	NA	NA	NA	NA	Y57G7A.2	NA	NA	F57C7.2	F53H4.5	D2063.1	D2023.3	M01A8.2	T05B11.1	ZK1058.6	NA	NA	NA	NA	NA	NA	T05C1.4	H06A10.2	ZC239.15	F41C3.4	NA	NA	NA	NA	NA	NA	NA	F56C11.6	NA	NA	NA	NA	NA
C04A2.1	F59A7.12	NA	NA	NA	NA	NA	NA	NA	F25E5.1	H12D21.15	Y105C5B.14	NA	NA	NA	NA	NA	Y57G7A.7	NA	NA	F57E7.1	F54B3.4	D2092.1	D2023.9	M01B2.7	T05C3.7	ZK1098.3	NA	NA	NA	NA	NA	NA	T05C12.8	H08J19.1	ZC317.2	F41E6.4	NA	NA	NA	NA	NA	NA	NA	F56C9.8	NA	NA	NA	NA	NA
C04A2.3	F59B2.2	NA	NA	NA	NA	NA	NA	NA	F25F2.1	H14A12.2	Y105C5B.1413	NA	NA	NA	NA	NA	Y59A8B.10	NA	NA	F57F10.1	F54C1.6	D2092.3	D2024.3	M01E10.2	T05C3.8	ZK1236.2	NA	NA	NA	NA	NA	NA	T05E8.2	H09G03.1	ZC334.10	F41G3.6	NA	NA	NA	NA	NA	NA	NA	F56D12.4	NA	NA	NA	NA	NA
C04A2.7	F59B2.5	NA	NA	NA	NA	NA	NA	NA	F25G6.9	H14E04.3	Y105E8B.6	NA	NA	NA	NA	NA	Y59A8B.6	NA	NA	F57F4.3	F54D12.5	D2092.8	D2024.4	M01E11.4	T05D4.2	ZK1307.1	NA	NA	NA	NA	NA	NA	T05F1.7	H09G03.2	ZC334.2	F41H10.11	NA	NA	NA	NA	NA	NA	NA	F56D3.1	NA	NA	NA	NA	NA
C04B4.2	F59B2.6	NA	NA	NA	NA	NA	NA	NA	F25H2.13	H17B01.4	Y106G6D.1	NA	NA	NA	NA	NA	Y59E9AR.3	NA	NA	F57F4.4	F54D12.6	D2096.3	D2030.10	M01F1.7	T05E11.8	ZK1307.6	NA	NA	NA	NA	NA	NA	T05G11.6	H10D18.2	ZC334.3	F41H10.6	NA	NA	NA	NA	NA	NA	NA	F56E10.2	NA	NA	NA	NA	NA
C04C11.1	F59B2.7	NA	NA	NA	NA	NA	NA	NA	F25H2.4	H20J04.2	Y106G6D.2	NA	NA	NA	NA	NA	Y59E9AR.5	NA	NA	F57F5.2	F54D5.15	D2096.6	D2030.5	M01G12.2	T05E7.1	ZK131.2	NA	NA	NA	NA	NA	NA	T05G5.12	H10D18.4	ZC334.8	F42A8.3	NA	NA	NA	NA	NA	NA	NA	F57B7.2	NA	NA	NA	NA	NA
C04C11.2	F59D12.5	NA	NA	NA	NA	NA	NA	NA	F25H2.5	H20J04.8	Y106G6H.5	NA	NA	NA	NA	NA	Y5H2B.3	NA	NA	F57G8.5	F54E2.3	D2096.9	D2045.8	M01G12.4	T05F1.10	ZK131.3	NA	NA	NA	NA	NA	NA	T06C12.10	H10D18.5	ZC334.9	F42A9.1	NA	NA	NA	NA	NA	NA	NA	F57B9.9	NA	NA	NA	NA	NA
C04C3.1	F59E12.13	NA	NA	NA	NA	NA	NA	NA	F25H2.6	H21P03.1	Y106G6H.9	NA	NA	NA	NA	NA	Y60A9.3	NA	NA	F58A3.1	F54E4.4	DH11.1	D2063.1	M01G12.5	T05F1.13	ZK131.5	NA	NA	NA	NA	NA	NA	T06C12.11	H10E21.1	ZC373.1	F42A9.6	NA	NA	NA	NA	NA	NA	NA	F57C9.3	NA	NA	NA	NA	NA
C04C3.2	F59E12.4	NA	NA	NA	NA	NA	NA	NA	F25H2.9	H21P03.3	Y110A2AL.1	NA	NA	NA	NA	NA	Y61A9LA.3	NA	NA	F58A3.2	F54F11.2	DH11.2	D2092.1	M01G4.1	T05G5.10	ZK131.6	NA	NA	NA	NA	NA	NA	T06C12.2	H12D21.11	ZC410.7	F42A9.8	NA	NA	NA	NA	NA	NA	NA	F57F5.2	NA	NA	NA	NA	NA
C04C3.3	F59E12.5	NA	NA	NA	NA	NA	NA	NA	F25H5.3	H26D21.1	Y110A7A.8	NA	NA	NA	NA	NA	Y62E10A.17	NA	NA	F58A4.11	F54F12.2	DY3.5	D2092.3	M01H9.3	T05H10.4	ZK131.7	NA	NA	NA	NA	NA	NA	T06C12.4	H14N18.1	ZC412.4	F42G8.10	NA	NA	NA	NA	NA	NA	NA	F57F5.5	NA	NA	NA	NA	NA
C04C3.5	F59E12.9	NA	NA	NA	NA	NA	NA	NA	F25H8.1	H26D21.2	Y111B2A.18	NA	NA	NA	NA	NA	Y63D3A.10	NA	NA	F58D5.3	F54G2.1	DY3.6	D2092.8	M02B1.2	T06E6.1	ZK131.9	NA	NA	NA	NA	NA	NA	T07A9.9	H14N18.2	ZC416.1	F42G9.6	NA	NA	NA	NA	NA	NA	NA	F57G12.2	NA	NA	NA	NA	NA
C04C3.6	F59G1.1	NA	NA	NA	NA	NA	NA	NA	F25H8.2	H27M09.2	Y111B2A.2	NA	NA	NA	NA	NA	Y63D3A.9	NA	NA	F58E6.1	F54G2.2	E01G6.1	D2096.3	M02B1.3	T07A9.9	ZK185.3	NA	NA	NA	NA	NA	NA	T07D10.2	H14N18.3	ZC416.4	F42H10.2	NA	NA	NA	NA	NA	NA	NA	F57G8.5	NA	NA	NA	NA	NA
C04C3.7	F59G1.3	NA	NA	NA	NA	NA	NA	NA	F25H9.6	H28O16.1	Y111B2A.3	NA	NA	NA	NA	NA	Y66A7A.8	NA	NA	F58E6.13	F54G8.2	E01H11.1	D2096.6	M02D8.7	T07C4.10	ZK355.2	NA	NA	NA	NA	NA	NA	T07E3.3	H14N18.4	ZC443.4	F42H10.7	NA	NA	NA	NA	NA	NA	NA	F58A6.1	NA	NA	NA	NA	NA
C04C3.9	F59G1.5	NA	NA	NA	NA	NA	NA	NA	F26A1.1	H28O16.2	Y113G7B.17	NA	NA	NA	NA	NA	Y66D12A.12	NA	NA	F58E6.3	F54G8.5	E01H11.3	D2096.9	M02F4.3	T07C4.2	ZK455.1	NA	NA	NA	NA	NA	NA	T07E3.4	H19N07.4	ZC449.4	F42H11.2	NA	NA	NA	NA	NA	NA	NA	F58A6.6	NA	NA	NA	NA	NA
C04D8.1	F59G1.7	NA	NA	NA	NA	NA	NA	NA	F26A3.3	H34C03.2	Y113G7B.2	NA	NA	NA	NA	NA	Y67A10A.4	NA	NA	F58E6.4	F55A3.5	E02A10.3	DH11.1	M02G9.1	T07D1.4	ZK507.6	NA	NA	NA	NA	NA	NA	T08B1.4	H21P03.3	ZC455.6	F43C1.2	NA	NA	NA	NA	NA	NA	NA	F58B4.2	NA	NA	NA	NA	NA
C04E12.11	H02I12.1	NA	NA	NA	NA	NA	NA	NA	F26A3.7	H35B03.2	Y113G7B.3	NA	NA	NA	NA	NA	Y67D8B.5	NA	NA	F58F9.3	F55A3.6	E02C12.13	DH11.2	M02G9.4	T07D3.7	ZK512.2	NA	NA	NA	NA	NA	NA	T08B6.6	H23L24.3	ZC47.3	F43C1.6	NA	NA	NA	NA	NA	NA	NA	F58B4.6	NA	NA	NA	NA	NA
C04E12.12	H02I12.5	NA	NA	NA	NA	NA	NA	NA	F26B1.3	H42K12.1	Y113G7B.4	NA	NA	NA	NA	NA	Y69A2AR.17	NA	NA	F58G1.4	F55B11.4	E02C12.4	DH11.4	M03D4.6	T07D4.2	ZK512.3	NA	NA	NA	NA	NA	NA	T08D2.2	H23L24.4	ZK1053.5	F43D2.1	NA	NA	NA	NA	NA	NA	NA	F58D5.5	NA	NA	NA	NA	NA
C04E12.2	H02I12.8	NA	NA	NA	NA	NA	NA	NA	F26D10.10	K01A2.6	Y113G7B.6	NA	NA	NA	NA	NA	Y69A2AR.30	NA	NA	F58G1.5	F55D10.5	E02C12.5	DH11.5	M03F4.2	T07F10.5	ZK593.1	NA	NA	NA	NA	NA	NA	T08E11.8	H23N18.1	ZK1055.6	F43D9.3	NA	NA	NA	NA	NA	NA	NA	F58E6.1	NA	NA	NA	NA	NA
C04E12.4	H04D03.2	NA	NA	NA	NA	NA	NA	NA	F26D10.3	K01C8.10	Y113G7B.8	NA	NA	NA	NA	NA	Y69E1A.1	NA	NA	F58G1.6	F55D12.5	E02H1.7	DY3.6	M03F8.7	T07F8.1	ZK622.3	NA	NA	NA	NA	NA	NA	T08G11.1	H23N18.2	ZK1067.4	F43D9.4	NA	NA	NA	NA	NA	NA	NA	F58E6.7	NA	NA	NA	NA	NA
C04E12.5	H04D03.6	NA	NA	NA	NA	NA	NA	NA	F26D2.2	K01G12.3	Y113G7B.9	NA	NA	NA	NA	NA	Y69F12A.2	NA	NA	F58G6.4	F55E10.6	E02H4.1	E01H11.3	M04D8.3	T07G12.8	ZK637.7	NA	NA	NA	NA	NA	NA	T08G3.8	H23N18.3	ZK1290.13	F43D9.5	NA	NA	NA	NA	NA	NA	NA	F58F6.3	NA	NA	NA	NA	NA
C04E12.6	H04M03.3	NA	NA	NA	NA	NA	NA	NA	F26E4.1	K01G5.4	Y116A8B.1	NA	NA	NA	NA	NA	Y6D1A.1	NA	NA	F58H12.1	F55E10.7	E02H4.7	E02A10.3	M04D8.7	T08A9.1	ZK688.6	NA	NA	NA	NA	NA	NA	T08G5.15	H25K10.7	ZK1290.2	F43E2.2	NA	NA	NA	NA	NA	NA	NA	F58F6.5	NA	NA	NA	NA	NA
C04E12.7	H05L14.2	NA	NA	NA	NA	NA	NA	NA	F26E4.10	K01G5.5	Y116A8C.13	NA	NA	NA	NA	NA	Y6G8.9	NA	NA	F59A1.12	F55F1.5	E02H9.2	E02A10.4	M04D8.8	T08B1.6	ZK688.7	NA	NA	NA	NA	NA	NA	T09A12.3	H27C11.1	ZK250.5	F43G6.10	NA	NA	NA	NA	NA	NA	NA	F58G1.5	NA	NA	NA	NA	NA
C04E6.11	H06H21.11	NA	NA	NA	NA	NA	NA	NA	F26E4.11	K01G5.7	Y116A8C.17	NA	NA	NA	NA	NA	Y71A12B.11	NA	NA	F59B10.5	F55F3.3	E02H9.4	E02C12.13	M04G12.1	T08E11.5	ZK742.3	NA	NA	NA	NA	NA	NA	T09A5.12	H32K16.2	ZK270.1	F43G6.7	NA	NA	NA	NA	NA	NA	NA	F58G1.6	NA	NA	NA	NA	NA
C04E6.13	H06H21.6	NA	NA	NA	NA	NA	NA	NA	F26E4.4	K01H12.2	Y116A8C.19	NA	NA	NA	NA	NA	Y71A12B.17	NA	NA	F59B10.6	F55F8.8	E03D2.1	E02C12.4	M04G7.1	T08E11.6	ZK783.4	NA	NA	NA	NA	NA	NA	T09A5.14	H35B03.1	ZK287.2	F43G6.9	NA	NA	NA	NA	NA	NA	NA	F58G1.7	NA	NA	NA	NA	NA
C04E6.4	H11L12.1	NA	NA	NA	NA	NA	NA	NA	F26F2.7	K02B12.5	Y116A8C.20	NA	NA	NA	NA	NA	Y71A12B.2	NA	NA	F59C12.1	F55G1.1	E03D2.2	E02C12.5	M163.10	T08G2.3	ZK792.1	NA	NA	NA	NA	NA	NA	T09D3.4	H36L18.2	ZK287.7	F43G9.10	NA	NA	NA	NA	NA	NA	NA	F58G4.1	NA	NA	NA	NA	NA
C04E6.5	H12D21.13	NA	NA	NA	NA	NA	NA	NA	F26F4.1	K02B12.8	Y116A8C.22	NA	NA	NA	NA	NA	Y71A12B.3	NA	NA	F59E11.2	F55G1.15	E03G2.3	E02H1.7	M163.8	T09B4.8	ZK792.6	NA	NA	NA	NA	NA	NA	T09D3.9	H39E23.2	ZK337.1	F43G9.13	NA	NA	NA	NA	NA	NA	NA	F58G6.3	NA	NA	NA	NA	NA
C04E6.6	H12D21.14	NA	NA	NA	NA	NA	NA	NA	F26F4.10	K02B9.1	Y116A8C.35	NA	NA	NA	NA	NA	Y71F9B.8	NA	NA	F59F3.2	F55H12.3	E03H4.10	E02H4.7	M176.7	T10B5.8	ZK792.8	NA	NA	NA	NA	NA	NA	T09F3.2	H39E23.3	ZK370.5	F43G9.2	NA	NA	NA	NA	NA	NA	NA	F58G6.4	NA	NA	NA	NA	NA
C04E6.7	H12D21.15	NA	NA	NA	NA	NA	NA	NA	F26F4.4	K02B9.2	Y116A8C.4	NA	NA	NA	NA	NA	Y71G10AL.1	NA	NA	F59F3.4	F55H2.1	E03H4.8	E02H9.2	M28.10	T10C6.12	ZK822.2	NA	NA	NA	NA	NA	NA	T10B10.4	H40L08.2	ZK418.7	F43G9.4	NA	NA	NA	NA	NA	NA	NA	F58G6.5	NA	NA	NA	NA	NA
C04E6.8	H12I13.4	NA	NA	NA	NA	NA	NA	NA	F26F4.5	K02F2.1	Y116A8C.5	NA	NA	NA	NA	NA	Y71G12B.15	NA	NA	F59F5.7	F56A11.4	E04D5.3	E02H9.4	M7.1	T11B7.1	ZK909.5	NA	NA	NA	NA	NA	NA	T10B11.6	H40L08.3	ZK455.2	F43G9.5	NA	NA	NA	NA	NA	NA	NA	F58H12.1	NA	NA	NA	NA	NA
C04E7.2	H14A12.2	NA	NA	NA	NA	NA	NA	NA	F26G1.1	K02F2.2	Y119D3B.15	NA	NA	NA	NA	NA	Y71G12B.20	NA	NA	F59G1.4	F56A6.2	E04D5.5	E02H9.8	M7.3	T11F9.18	ZK930.3	NA	NA	NA	NA	NA	NA	T10C6.15	H41C03.2	ZK455.5	F43G9.9	NA	NA	NA	NA	NA	NA	NA	F58H7.1	NA	NA	NA	NA	NA
C04E7.3	H14A12.3	NA	NA	NA	NA	NA	NA	NA	F26G5.1	K02F3.11	Y13C8A.1	NA	NA	NA	NA	NA	Y71G12B.5	NA	NA	H01G02.2	F56A8.1	E04F6.10	E03D2.1	M7.7	T12G3.1	ZK930.6	NA	NA	NA	NA	NA	NA	T10D4.3	K01A12.3	ZK455.6	F44A2.1	NA	NA	NA	NA	NA	NA	NA	F59A3.10	NA	NA	NA	NA	NA
C04E7.4	H14A12.5	NA	NA	NA	NA	NA	NA	NA	F26H11.4	K02F6.7	Y13C8A.2	NA	NA	NA	NA	NA	Y73B6BL.24	NA	NA	H01G02.3	F56C11.1	E04F6.15	E03D2.2	M88.5	T12G3.2	ZK938.2	NA	NA	NA	NA	NA	NA	T10E10.3	K01A2.10	ZK488.2	F44B9.4	NA	NA	NA	NA	NA	NA	NA	F59A6.6	NA	NA	NA	NA	NA
C04F1.1	H14E04.3	NA	NA	NA	NA	NA	NA	NA	F26H11.5	K02F6.9	Y19D10A.1	NA	NA	NA	NA	NA	Y73C8C.3	NA	NA	H01M10.2	F56C11.2	E04F6.4	E03G2.3	R01H10.3	T13F2.3	ZK945.3	NA	NA	NA	NA	NA	NA	T10G3.1	K01A2.2	ZK512.2	F44B9.7	NA	NA	NA	NA	NA	NA	NA	F59B10.3	NA	NA	NA	NA	NA
C04F1.3	H19N07.1	NA	NA	NA	NA	NA	NA	NA	F26H11.6	K03A11.1	Y19D10A.11	NA	NA	NA	NA	NA	Y73C8C.8	NA	NA	H03A11.1	F56C11.6	E04F6.8	E03H4.10	R02D1.1	T13F2.8	NA	NA	NA	NA	NA	NA	NA	T10G3.8	K01A2.9	ZK54.2	F44C4.4	NA	NA	NA	NA	NA	NA	NA	F59C6.11	NA	NA	NA	NA	NA
C04F12.1	H20J04.2	NA	NA	NA	NA	NA	NA	NA	F26H9.1	K03B4.1	Y19D10A.16	NA	NA	NA	NA	NA	Y73F8A.16	NA	NA	H03E18.1	F56C3.8	EGAP2.3	E04D5.2	R02D5.10	T13G4.4	NA	NA	NA	NA	NA	NA	NA	T10H4.11	K01B6.1	ZK546.14	F44E2.10	NA	NA	NA	NA	NA	NA	NA	F59C6.14	NA	NA	NA	NA	NA
C04F12.10	H20J04.9	NA	NA	NA	NA	NA	NA	NA	F26H9.2	K03B4.3	Y19D2B.2	NA	NA	NA	NA	NA	Y73F8A.17	NA	NA	H04M03.4	F56C4.3	EGAP5.1	E04D5.3	R02E12.2	T13H2.4	NA	NA	NA	NA	NA	NA	NA	T10H4.6	K01B6.4	ZK563.2	F44E2.2	NA	NA	NA	NA	NA	NA	NA	F59D12.1	NA	NA	NA	NA	NA
C04F12.12	H21P03.1	NA	NA	NA	NA	NA	NA	NA	F27B3.6	K03B8.11	Y20C6A.2	NA	NA	NA	NA	NA	Y73F8A.36	NA	NA	H05L03.3	F56D3.1	F01D4.2	E04D5.5	R02E12.8	T14F9.2	NA	NA	NA	NA	NA	NA	NA	T10H9.1	K01D12.10	ZK593.1	F44E2.7	NA	NA	NA	NA	NA	NA	NA	F59F3.2	NA	NA	NA	NA	NA
C04F12.3	H21P03.2	NA	NA	NA	NA	NA	NA	NA	F27C8.6	K03B8.14	Y24F12A.3	NA	NA	NA	NA	NA	Y75B12A.2	NA	NA	H06H21.10	F56D5.6	F01D4.4	E04F6.10	R03E9.1	T14F9.3	NA	NA	NA	NA	NA	NA	NA	T12A7.5	K01D12.12	ZK622.2	F44E7.9	NA	NA	NA	NA	NA	NA	NA	F59F3.6	NA	NA	NA	NA	NA
C04F12.4	H21P03.3	NA	NA	NA	NA	NA	NA	NA	F27D4.4	K03D10.3	Y25C1A.1	NA	NA	NA	NA	NA	Y75B8A.19	NA	NA	H06I04.6	F56F11.3	F01D4.8	E04F6.2	R03H4.2	T14G12.4	NA	NA	NA	NA	NA	NA	NA	T12A7.6	K01F9.2	ZK632.3	F44G4.4	NA	NA	NA	NA	NA	NA	NA	F59F5.5	NA	NA	NA	NA	NA
C04F12.5	H25P06.1	NA	NA	NA	NA	NA	NA	NA	F27D4.5	K03H1.13	Y25C1A.6	NA	NA	NA	NA	NA	Y77E11A.9	NA	NA	H08M01.1	F56H11.1	F01D4.9	E04F6.4	R04B5.8	T14G8.1	NA	NA	NA	NA	NA	NA	NA	T12B3.1	K02A2.5	ZK637.8	F45B8.1	NA	NA	NA	NA	NA	NA	NA	H01A20.1	NA	NA	NA	NA	NA
C04F12.6	H25P19.1	NA	NA	NA	NA	NA	NA	NA	F27D4.8	K03H1.7	Y26E6A.3	NA	NA	NA	NA	NA	Y81B9A.2	NA	NA	H10D18.5	F56H9.6	F01D5.1	E04F6.6	R05A10.1	T14G8.2	NA	NA	NA	NA	NA	NA	NA	T12C9.5	K02B2.3	ZK652.5	F45B8.2	NA	NA	NA	NA	NA	NA	NA	H03E18.2	NA	NA	NA	NA	NA
C04F12.7	H27A22.1	NA	NA	NA	NA	NA	NA	NA	F28B3.5	K03H4.2	Y27F2A.6	NA	NA	NA	NA	NA	Y82E9BL.2	NA	NA	H13N06.2	F57B10.3	F01D5.10	E04F6.7	R05A10.5	T14G8.3	NA	NA	NA	NA	NA	NA	NA	T12C9.6	K02C4.2	ZK675.2	F45D11.9	NA	NA	NA	NA	NA	NA	NA	H05G16.1	NA	NA	NA	NA	NA
C04F12.8	H27M09.3	NA	NA	NA	NA	NA	NA	NA	F28B3.6	K03H6.6	Y27F2A.8	NA	NA	NA	NA	NA	Y82E9BL.3	NA	NA	H22K11.1	F57B7.1	F01D5.2	E04F6.8	R05C11.2	T15H9.5	NA	NA	NA	NA	NA	NA	NA	T12D8.4	K02E2.6	ZK682.2	F45D3.5	NA	NA	NA	NA	NA	NA	NA	H10D18.1	NA	NA	NA	NA	NA
C04F12.9	H28O16.1	NA	NA	NA	NA	NA	NA	NA	F28B3.8	K04C2.3	Y32F6A.1	NA	NA	NA	NA	NA	Y82E9BL.5	NA	NA	H22K11.4	F57B9.3	F01D5.3	EEED8.6	R05C11.3	T16A1.8	NA	NA	NA	NA	NA	NA	NA	T12G3.1	K02E7.10	ZK721.4	F45E12.1	NA	NA	NA	NA	NA	NA	NA	H10E21.2	NA	NA	NA	NA	NA
C04F5.1	H31G24.3	NA	NA	NA	NA	NA	NA	NA	F28B3.9	K04C2.6	Y37D8A.14	NA	NA	NA	NA	NA	Y82E9BL.6	NA	NA	H24G06.1	F57B9.9	F01D5.5	EGAP1.1	R05F9.1	T16G12.4	NA	NA	NA	NA	NA	NA	NA	T13A10.2	K02F3.8	ZK783.2	F45E12.2	NA	NA	NA	NA	NA	NA	NA	H12D21.9	NA	NA	NA	NA	NA
C04F5.3	H31G24.4	NA	NA	NA	NA	NA	NA	NA	F28C10.3	K04G2.1	Y37D8A.4	NA	NA	NA	NA	NA	Y82E9BR.16	NA	NA	H27M09.4	F57C7.4	F01D5.6	EGAP2.3	R05F9.6	T17A3.1	NA	NA	NA	NA	NA	NA	NA	T13F2.5	K02F3.9	ZK84.6	F45E4.9	NA	NA	NA	NA	NA	NA	NA	H13N06.2	NA	NA	NA	NA	NA
C04F5.7	H37A05.1	NA	NA	NA	NA	NA	NA	NA	F28C6.2	K04G2.5	Y37E11AL.3	NA	NA	NA	NA	NA	Y8A9A.5	NA	NA	H34I24.2	F57F10.1	F01D5.9	EGAP4.1	R05G6.11	T17A3.3	NA	NA	NA	NA	NA	NA	NA	T13F3.1	K03B4.4	ZK856.10	F45F2.10	NA	NA	NA	NA	NA	NA	NA	H19M22.2	NA	NA	NA	NA	NA
C04F5.8	H43I07.1	NA	NA	NA	NA	NA	NA	NA	F28C6.3	K05C4.1	Y37E11AL.7	NA	NA	NA	NA	NA	Y92H12BR.3	NA	NA	H36L18.1	F57F4.3	F01E11.5	EGAP5.1	R05G6.12	T17A3.4	NA	NA	NA	NA	NA	NA	NA	T16H12.1	K03B8.7	ZK863.3	F45F2.11	NA	NA	NA	NA	NA	NA	NA	H22K11.3	NA	NA	NA	NA	NA
C04F5.9	JC8.5	NA	NA	NA	NA	NA	NA	NA	F28F8.4	K05C4.7	Y37E11AL.9	NA	NA	NA	NA	NA	Y95B8A.7	NA	NA	H42K12.3	F57F4.4	F01F1.13	F01D4.2	R05G6.7	T17A3.6	NA	NA	NA	NA	NA	NA	NA	T16H12.3	K03E5.2	ZK863.9	F45G2.10	NA	NA	NA	NA	NA	NA	NA	H23L24.1	NA	NA	NA	NA	NA
C04F6.1	K01C8.3	NA	NA	NA	NA	NA	NA	NA	F28F8.5	K05F6.12	Y37H2A.4	NA	NA	NA	NA	NA	Y95B8A.8	NA	NA	H43E16.1	F57F5.2	F01G10.10	F01D4.4	R05H10.1	T17A3.7	NA	NA	NA	NA	NA	NA	NA	T18D3.4	K03E6.3	ZK938.3	F45G2.3	NA	NA	NA	NA	NA	NA	NA	H23N18.6	NA	NA	NA	NA	NA
C04F6.3	K01C8.5	NA	NA	NA	NA	NA	NA	NA	F28F8.6	K05F6.4	Y37H2A.5	NA	NA	NA	NA	NA	Y97E10AM.1	NA	NA	K01A12.2	F57F5.5	F01G10.3	F01D5.1	R05H10.5	T18D3.1	NA	NA	NA	NA	NA	NA	NA	T18D3.6	K03F8.2	ZK938.4	F45G2.7	NA	NA	NA	NA	NA	NA	NA	H25P06.1	NA	NA	NA	NA	NA
C04F6.4	K01D12.6	NA	NA	NA	NA	NA	NA	NA	F28H1.3	K06A5.2	Y38C1AA.2	NA	NA	NA	NA	NA	Y9C9A.13	NA	NA	K01A2.10	F57H12.3	F02A9.1	F01D5.10	R06A10.2	T19C3.1	NA	NA	NA	NA	NA	NA	NA	T18H9.7	K03H1.11	ZK945.4	F45H10.2	NA	NA	NA	NA	NA	NA	NA	H31B20.1	NA	NA	NA	NA	NA
C04F6.5	K01G12.3	NA	NA	NA	NA	NA	NA	NA	F28H6.8	K06A5.3	Y38C9A.2	NA	NA	NA	NA	NA	ZC204.10	NA	NA	K01A2.11	F57H12.4	F02C12.1	F01D5.2	R06B9.4	T20B12.6	NA	NA	NA	NA	NA	NA	NA	T19A6.2	K04A8.3	ZK971.1	F45H11.3	NA	NA	NA	NA	NA	NA	NA	JC8.10	NA	NA	NA	NA	NA
C04G2.1	K01H12.2	NA	NA	NA	NA	NA	NA	NA	F28H7.4	K06A5.6	Y38C9B.1	NA	NA	NA	NA	NA	ZC204.11	NA	NA	K01A6.2	F58A3.2	F02C12.4	F01D5.3	R06C1.6	T20B3.1	NA	NA	NA	NA	NA	NA	NA	T19C4.6	K04A8.5	NA	F45H11.5	NA	NA	NA	NA	NA	NA	NA	K01A2.7	NA	NA	NA	NA	NA
C04G2.10	K02A11.1	NA	NA	NA	NA	NA	NA	NA	F29B9.4	K06A5.7	Y38E10A.28	NA	NA	NA	NA	NA	ZC204.3	NA	NA	K01B6.1	F58B3.2	F02C9.2	F01D5.5	R06F6.7	T20D4.19	NA	NA	NA	NA	NA	NA	NA	T19C9.10	K04A8.8	NA	F46A9.4	NA	NA	NA	NA	NA	NA	NA	K01B6.2	NA	NA	NA	NA	NA
C04G2.2	K02B2.3	NA	NA	NA	NA	NA	NA	NA	F29B9.6	K06H7.4	Y38E10A.3	NA	NA	NA	NA	NA	ZC204.7	NA	NA	K01D12.3	F58E6.1	F02C9.3	F01D5.9	R07B5.7	T20F5.7	NA	NA	NA	NA	NA	NA	NA	T19D2.2	K04A8.9	NA	F46B6.3	NA	NA	NA	NA	NA	NA	NA	K01B6.3	NA	NA	NA	NA	NA
C04G2.4	K02B2.4	NA	NA	NA	NA	NA	NA	NA	F29C12.3	K06H7.6	Y38E10A.4	NA	NA	NA	NA	NA	ZC204.8	NA	NA	K01D12.4	F58F6.3	F02D8.1	F01E11.5	R07C3.3	T20G5.4	NA	NA	NA	NA	NA	NA	NA	T19D7.4	K04C2.5	NA	F46B6.5	NA	NA	NA	NA	NA	NA	NA	K02A4.2	NA	NA	NA	NA	NA
C04G2.5	K02B9.1	NA	NA	NA	NA	NA	NA	NA	F29G9.2	K06H7.7	Y38F2AR.1	NA	NA	NA	NA	NA	ZC204.9	NA	NA	K02C4.5	F58F6.6	F02D8.2	F01F1.13	R07D5.1	T21B6.1	NA	NA	NA	NA	NA	NA	NA	T19E7.2	K04G11.2	NA	F46C3.7	NA	NA	NA	NA	NA	NA	NA	K02D10.5	NA	NA	NA	NA	NA
C04G2.6	K02B9.2	NA	NA	NA	NA	NA	NA	NA	F29G9.5	K07A1.1	Y39A1A.1	NA	NA	NA	NA	NA	ZC239.20	NA	NA	K02D7.4	F58G1.5	F02D8.3	F01F1.8	R07E4.6	T22B11.1	NA	NA	NA	NA	NA	NA	NA	T19F4.1	K04G11.5	NA	F46F11.10	NA	NA	NA	NA	NA	NA	NA	K02E10.5	NA	NA	NA	NA	NA
C04G2.7	K02C4.3	NA	NA	NA	NA	NA	NA	NA	F30A10.3	K07A1.11	Y39A1A.11	NA	NA	NA	NA	NA	ZC239.21	NA	NA	K02E10.4	F58G1.6	F02D8.4	F01G10.2	R07E5.5	T22B7.3	NA	NA	NA	NA	NA	NA	NA	T19H12.8	K05B2.3	NA	F46F11.8	NA	NA	NA	NA	NA	NA	NA	K02E2.11	NA	NA	NA	NA	NA
C04G2.8	K02D10.4	NA	NA	NA	NA	NA	NA	NA	F30A10.5	K07A1.2	Y39A1A.16	NA	NA	NA	NA	NA	ZC373.1	NA	NA	K02E11.10	F58G1.7	F02D8.5	F01G10.3	R07G3.2	T22B7.4	NA	NA	NA	NA	NA	NA	NA	T19H12.9	K05F1.6	NA	F46F3.4	NA	NA	NA	NA	NA	NA	NA	K02E2.2	NA	NA	NA	NA	NA
C04G2.9	K02F2.4	NA	NA	NA	NA	NA	NA	NA	F30B5.4	K07A12.1	Y39A1A.17	NA	NA	NA	NA	NA	ZC376.2	NA	NA	K02E7.1	F58G11.4	F02E11.7	F01G10.8	R08B4.4	T22C1.11	NA	NA	NA	NA	NA	NA	NA	T21D12.9	K05F6.11	NA	F47D12.9	NA	NA	NA	NA	NA	NA	NA	K02F3.4	NA	NA	NA	NA	NA
C04G6.1	K02F3.10	NA	NA	NA	NA	NA	NA	NA	F30F8.1	K07A12.3	Y39A3CR.1	NA	NA	NA	NA	NA	ZC53.6	NA	NA	K03A11.6	F58G4.1	F07A11.1	F02A9.1	R08E3.1	T22C8.4	NA	NA	NA	NA	NA	NA	NA	T22C8.6	K06A4.10	NA	F47G9.1	NA	NA	NA	NA	NA	NA	NA	K02F3.5	NA	NA	NA	NA	NA
C04G6.10	K02F6.7	NA	NA	NA	NA	NA	NA	NA	F30F8.10	K07D4.3	Y39G10AL.1	NA	NA	NA	NA	NA	ZC84.3	NA	NA	K03B8.6	F58G6.4	F07A5.5	F02A9.2	R08E3.2	T22D1.11	NA	NA	NA	NA	NA	NA	NA	T22D1.12	K06A4.2	NA	F48A11.4	NA	NA	NA	NA	NA	NA	NA	K02H8.1	NA	NA	NA	NA	NA
C04G6.11	K03B4.2	NA	NA	NA	NA	NA	NA	NA	F30F8.3	K07D4.4	Y39H10A.2	NA	NA	NA	NA	NA	ZK1010.9	NA	NA	K03E6.5	F58H7.1	F07B10.5	F02C12.4	R09B5.11	T22H2.6	NA	NA	NA	NA	NA	NA	NA	T22D1.3	K06B4.11	NA	F48C1.5	NA	NA	NA	NA	NA	NA	NA	K03B8.6	NA	NA	NA	NA	NA
C04G6.13	K03B4.3	NA	NA	NA	NA	NA	NA	NA	F30F8.9	K07E8.7	Y40A1A.2	NA	NA	NA	NA	NA	ZK1058.6	NA	NA	K04A8.1	F59A1.11	F07B7.13	F02C9.3	R09B5.13	T22H6.2	NA	NA	NA	NA	NA	NA	NA	T22G5.4	K06C4.17	NA	F48C1.6	NA	NA	NA	NA	NA	NA	NA	K03B8.8	NA	NA	NA	NA	NA
C04G6.2	K03H6.6	NA	NA	NA	NA	NA	NA	NA	F31A3.2	K07G5.1	Y40B1B.5	NA	NA	NA	NA	NA	ZK1251.7	NA	NA	K04E7.2	F59A1.12	F07C3.1	F02D8.1	R09D1.3	T23C6.1	NA	NA	NA	NA	NA	NA	NA	T22H6.4	K06C4.9	NA	F48E8.6	NA	NA	NA	NA	NA	NA	NA	K03C7.2	NA	NA	NA	NA	NA
C04G6.3	K04C2.3	NA	NA	NA	NA	NA	NA	NA	F31B9.3	K08A8.1	Y40G12A.1	NA	NA	NA	NA	NA	ZK1320.10	NA	NA	K04F10.4	F59A1.16	F07C3.2	F02D8.2	R09G11.2	T23C6.4	NA	NA	NA	NA	NA	NA	NA	T22H6.6	K07A1.16	NA	F48E8.7	NA	NA	NA	NA	NA	NA	NA	K03C7.3	NA	NA	NA	NA	NA
C04G6.4	K04D7.2	NA	NA	NA	NA	NA	NA	NA	F31C3.2	K08D10.12	Y41D4B.14	NA	NA	NA	NA	NA	ZK177.1	NA	NA	K04G11.1	F59A1.4	F07C4.1	F02D8.4	R09H10.5	T23D8.5	NA	NA	NA	NA	NA	NA	NA	T23B3.3	K07A1.7	NA	F48F5.5	NA	NA	NA	NA	NA	NA	NA	K03E5.1	NA	NA	NA	NA	NA
C04G6.5	K04F10.3	NA	NA	NA	NA	NA	NA	NA	F31C3.4	K08D12.1	Y41D4B.19	NA	NA	NA	NA	NA	ZK177.10	NA	NA	K04G11.2	F59B1.2	F07C4.11	F02D8.5	R10E11.2	T23D8.9	NA	NA	NA	NA	NA	NA	NA	T23B3.4	K07A12.8	NA	F49C12.8	NA	NA	NA	NA	NA	NA	NA	K03E6.1	NA	NA	NA	NA	NA
C04G6.6	K04F10.6	NA	NA	NA	NA	NA	NA	NA	F31E3.4	K08E3.3	Y41G9A.6	NA	NA	NA	NA	NA	ZK185.2	NA	NA	K04H4.2	F59B1.4	F07C6.2	F02E11.7	R10E8.3	T23G5.6	NA	NA	NA	NA	NA	NA	NA	T23C6.5	K07A3.2	NA	F49E8.1	NA	NA	NA	NA	NA	NA	NA	K03E6.5	NA	NA	NA	NA	NA
C04G6.7	K04G2.6	NA	NA	NA	NA	NA	NA	NA	F31E9.2	K08E3.4	Y42H9AR.2	NA	NA	NA	NA	NA	ZK20.6	NA	NA	K04H4.5	F59B1.9	F07D3.2	F02E8.2	R10F2.4	T24A6.20	NA	NA	NA	NA	NA	NA	NA	T23D5.1	K07B1.4	NA	F49E8.2	NA	NA	NA	NA	NA	NA	NA	K03E6.7	NA	NA	NA	NA	NA
C04H4.1	K05C4.1	NA	NA	NA	NA	NA	NA	NA	F31F6.1	K08E3.7	Y42H9B.3	NA	NA	NA	NA	NA	ZK250.6	NA	NA	K05B2.3	F59B10.4	F07F6.6	F07A11.1	R10F2.5	T24B8.3	NA	NA	NA	NA	NA	NA	NA	T23D5.6	K07B1.5	NA	F52A8.6	NA	NA	NA	NA	NA	NA	NA	K03H6.1	NA	NA	NA	NA	NA
C04H5.1	K06A5.1	NA	NA	NA	NA	NA	NA	NA	F31F6.2	K08E4.2	Y43B11AL.1	NA	NA	NA	NA	NA	ZK380.1	NA	NA	K05B2.5	F59D12.1	F07G6.7	F07A5.5	R11D1.7	T24B8.6	NA	NA	NA	NA	NA	NA	NA	T23D5.7	K07C10.1	NA	F52B5.2	NA	NA	NA	NA	NA	NA	NA	K03H9.2	NA	NA	NA	NA	NA
C04H5.2	K06A5.7	NA	NA	NA	NA	NA	NA	NA	F31F6.3	K08E4.6	Y43C5A.1	NA	NA	NA	NA	NA	ZK380.4	NA	NA	K05C4.11	F59E11.2	F07G6.8	F07B10.5	R11F4.2	T24C12.3	NA	NA	NA	NA	NA	NA	NA	T23D8.3	K07C11.3	NA	F52B5.3	NA	NA	NA	NA	NA	NA	NA	K03H9.3	NA	NA	NA	NA	NA
C04H5.3	K06B9.2	NA	NA	NA	NA	NA	NA	NA	F32A11.1	K08E7.1	Y43D4A.6	NA	NA	NA	NA	NA	ZK402.3	NA	NA	K05F1.6	F59F3.2	F07H5.6	F07B7.13	R12B2.1	T24C2.3	NA	NA	NA	NA	NA	NA	NA	T23E7.4	K07C11.5	NA	F52B5.5	NA	NA	NA	NA	NA	NA	NA	K04C1.4	NA	NA	NA	NA	NA
C04H5.6	K06H7.9	NA	NA	NA	NA	NA	NA	NA	F32A11.2	K08E7.2	Y43F11A.1	NA	NA	NA	NA	NA	ZK430.5	NA	NA	K06A9.1	F59F5.5	F07H5.7	F07C3.10	R12G8.1	T24E12.5	NA	NA	NA	NA	NA	NA	NA	T23F2.2	K07C11.7	NA	F52C12.1	NA	NA	NA	NA	NA	NA	NA	K04E7.2	NA	NA	NA	NA	NA
C04H5.7	K07A1.17	NA	NA	NA	NA	NA	NA	NA	F32A7.4	K08E7.3	Y43F11A.4	NA	NA	NA	NA	NA	ZK593.1	NA	NA	K06A9.2	F59F5.7	F07H5.8	F07C3.2	R12H7.1	T24H10.1	NA	NA	NA	NA	NA	NA	NA	T23G4.2	K07C11.8	NA	F52C12.2	NA	NA	NA	NA	NA	NA	NA	K04G2.12	NA	NA	NA	NA	NA
C04H5.8	K07A1.2	NA	NA	NA	NA	NA	NA	NA	F32B4.2	K08F11.3	Y43F11A.5	NA	NA	NA	NA	NA	ZK6.3	NA	NA	K06B4.2	H02F09.3	F07H5.9	F07C6.2	R13A1.2	T25B9.8	NA	NA	NA	NA	NA	NA	NA	T23G4.3	K07C6.3	NA	F52C12.3	NA	NA	NA	NA	NA	NA	NA	K04G2.9	NA	NA	NA	NA	NA
C05A2.1	K07A1.8	NA	NA	NA	NA	NA	NA	NA	F32B6.2	K08F11.5	Y43F8B.12	NA	NA	NA	NA	NA	ZK6.4	NA	NA	K06G5.1	H03A11.2	F08A10.1	F07D3.2	R13A1.9	T25D1.1	NA	NA	NA	NA	NA	NA	NA	T23G7.3	K07C6.4	NA	F52C6.2	NA	NA	NA	NA	NA	NA	NA	K05B2.2	NA	NA	NA	NA	NA
C05A9.1	K07A12.2	NA	NA	NA	NA	NA	NA	NA	F32D1.6	K08F4.9	Y43H11AL.1	NA	NA	NA	NA	NA	ZK637.10	NA	NA	K07A3.1	H03E18.1	F08A10.2	F07E5.9	R13A5.10	T25D10.4	NA	NA	NA	NA	NA	NA	NA	T24A6.4	K07E1.1	NA	F52D2.2	NA	NA	NA	NA	NA	NA	NA	K05B2.4	NA	NA	NA	NA	NA
C05A9.2	K07A12.4	NA	NA	NA	NA	NA	NA	NA	F32D1.7	K08F9.2	Y44A6C.2	NA	NA	NA	NA	NA	ZK637.11	NA	NA	K07A9.2	H03G16.2	F08A7.1	F07F6.5	R13A5.6	T25E12.6	NA	NA	NA	NA	NA	NA	NA	T24A6.6	K07E3.4	NA	F52D2.4	NA	NA	NA	NA	NA	NA	NA	K05B2.5	NA	NA	NA	NA	NA
C05B10.1	K07C11.2	NA	NA	NA	NA	NA	NA	NA	F32D1.9	K08H10.1	Y45F10D.9	NA	NA	NA	NA	NA	ZK637.12	NA	NA	K07D4.6	H04M03.4	F08A8.3	F07F6.6	R13A5.9	T26A5.1	NA	NA	NA	NA	NA	NA	NA	T24C12.2	K07E3.8	NA	F52E1.1	NA	NA	NA	NA	NA	NA	NA	K05C4.10	NA	NA	NA	NA	NA
C05B5.1	K07E8.7	NA	NA	NA	NA	NA	NA	NA	F32D8.5	K08H10.4	Y45G12C.10	NA	NA	NA	NA	NA	ZK637.15	NA	NA	K07E8.9	H05G16.1	F08A8.4	F07G6.7	R13D11.1	T26A5.7	NA	NA	NA	NA	NA	NA	NA	T25B9.7	K07H8.12	NA	F52F12.3	NA	NA	NA	NA	NA	NA	NA	K05C4.11	NA	NA	NA	NA	NA
C05B5.11	K07G5.6	NA	NA	NA	NA	NA	NA	NA	F32E10.5	K08H2.2	Y46C8AL.1	NA	NA	NA	NA	NA	ZK637.4	NA	NA	K07G5.3	H06H21.10	F08B12.3	F07H5.8	R13D7.2	T26C11.9	NA	NA	NA	NA	NA	NA	NA	T25D10.1	K08B4.4	NA	F52G2.1	NA	NA	NA	NA	NA	NA	NA	K05D4.9	NA	NA	NA	NA	NA
C05B5.12	K07H8.1	NA	NA	NA	NA	NA	NA	NA	F32E10.9	K08H2.3	Y46C8AL.11	NA	NA	NA	NA	NA	ZK662.5	NA	NA	K07H8.5	H09G03.2	F08B12.4	F07H5.9	R13H8.1	T26H2.2	NA	NA	NA	NA	NA	NA	NA	T25D10.3	K08B4.6	NA	F52H2.5	NA	NA	NA	NA	NA	NA	NA	K06A1.1	NA	NA	NA	NA	NA
C05B5.2	K07H8.2	NA	NA	NA	NA	NA	NA	NA	F32H2.10	K09A9.4	Y46G5A.13	NA	NA	NA	NA	NA	ZK666.1	NA	NA	K08B12.1	H10D12.2	F08B4.4	F08A10.1	R173.3	T26H2.3	NA	NA	NA	NA	NA	NA	NA	T25D10.4	K08D12.7	NA	F52H3.4	NA	NA	NA	NA	NA	NA	NA	K06A4.4	NA	NA	NA	NA	NA
C05B5.3	K08A8.1	NA	NA	NA	NA	NA	NA	NA	F32H2.3	K09E4.3	Y46G5A.27	NA	NA	NA	NA	NA	ZK666.4	NA	NA	K08B5.1	H10D18.5	F08B6.4	F08A7.1	R74.3	T26H2.4	NA	NA	NA	NA	NA	NA	NA	T25F10.2	K08D8.10	NA	F53A2.5	NA	NA	NA	NA	NA	NA	NA	K06A9.1	NA	NA	NA	NA	NA
C05B5.4	K08B4.1	NA	NA	NA	NA	NA	NA	NA	F33A8.5	K09H11.3	Y46G5A.28	NA	NA	NA	NA	NA	ZK673.5	NA	NA	K08C7.1	H10D18.6	F08D12.2	F08A8.3	R90.2	T26H2.6	NA	NA	NA	NA	NA	NA	NA	T26E4.12	K08D8.9	NA	F53A2.8	NA	NA	NA	NA	NA	NA	NA	K06B4.1	NA	NA	NA	NA	NA
C05B5.5	K08C9.2	NA	NA	NA	NA	NA	NA	NA	F33D11.11	K10B2.3	Y46G5A.34	NA	NA	NA	NA	NA	ZK742.3	NA	NA	K08C7.2	H12I19.4	F08D12.7	F08A8.4	R90.3	T27A1.2	NA	NA	NA	NA	NA	NA	NA	T27A10.2	K08D9.2	NA	F53A3.2	NA	NA	NA	NA	NA	NA	NA	K06B4.2	NA	NA	NA	NA	NA
C05B5.6	K08D10.12	NA	NA	NA	NA	NA	NA	NA	F33D11.12	K10C3.2	Y46H3A.1	NA	NA	NA	NA	NA	ZK858.2	NA	NA	K08C9.5	H13N06.2	F08F3.1	F08B12.4	R90.4	T27A10.3	NA	NA	NA	NA	NA	NA	NA	T27C10.1	K08D9.6	NA	F53E10.6	NA	NA	NA	NA	NA	NA	NA	K06B4.7	NA	NA	NA	NA	NA
C05B5.7	K08D12.1	NA	NA	NA	NA	NA	NA	NA	F33D11.9	K10C8.1	Y46H3A.5	NA	NA	NA	NA	NA	ZK892.7	NA	NA	K08D12.2	H13N06.6	F08F3.10	F08B12.5	T01B6.3	T27C4.4	NA	NA	NA	NA	NA	NA	NA	T27C4.1	K08E4.3	NA	F53E4.1	NA	NA	NA	NA	NA	NA	NA	K06G5.3	NA	NA	NA	NA	NA
C05B5.8	K08D9.3	NA	NA	NA	NA	NA	NA	NA	F33D4.4	K10D2.3	Y46H3C.5	NA	NA	NA	NA	NA	ZK899.5	NA	NA	K08D12.5	H22K11.1	F08F3.4	F08B4.4	T01D3.1	T27D12.1	NA	NA	NA	NA	NA	NA	NA	T27D12.1	K08E4.5	NA	F53F1.2	NA	NA	NA	NA	NA	NA	NA	K07A12.6	NA	NA	NA	NA	NA
C05C10.1	K08E3.4	NA	NA	NA	NA	NA	NA	NA	F33E11.2	K10D2.4	Y46H3C.7	NA	NA	NA	NA	NA	ZK899.6	NA	NA	K08D8.3	H23L24.1	F08F3.7	F08B6.4	T01D3.7	T27F6.10	NA	NA	NA	NA	NA	NA	NA	T27E4.7	K08F4.11	NA	F53F10.3	NA	NA	NA	NA	NA	NA	NA	K07A9.2	NA	NA	NA	NA	NA
C05C10.2	K08E3.5	NA	NA	NA	NA	NA	NA	NA	F33E11.3	K10H10.1	Y47D3A.12	NA	NA	NA	NA	NA	NA	NA	NA	K08E3.5	H23L24.3	F08F8.5	F08D12.2	T01H10.2	T27F6.2	NA	NA	NA	NA	NA	NA	NA	T27E7.3	K08F4.4	NA	F53F10.8	NA	NA	NA	NA	NA	NA	NA	K07A9.3	NA	NA	NA	NA	NA
C05C10.3	K08E4.3	NA	NA	NA	NA	NA	NA	NA	F33G12.2	K11D12.2	Y47D3A.28	NA	NA	NA	NA	NA	NA	NA	NA	K08E4.3	H23N18.5	F08G12.8	F08D12.7	T01H8.1	T27F7.2	NA	NA	NA	NA	NA	NA	NA	T27E9.1	K08F4.6	NA	F53F4.12	NA	NA	NA	NA	NA	NA	NA	K07A9.4	NA	NA	NA	NA	NA
C05C10.4	K08E7.3	NA	NA	NA	NA	NA	NA	NA	F33G12.3	K12D12.5	Y47D7A.1	NA	NA	NA	NA	NA	NA	NA	NA	K08E7.7	H30A04.1	F08G2.5	F08F1.1	T02B11.3	T28C6.3	NA	NA	NA	NA	NA	NA	NA	T27E9.2	K08F9.3	NA	F53F4.3	NA	NA	NA	NA	NA	NA	NA	K07C11.10	NA	NA	NA	NA	NA
C05C10.5	K08F4.2	NA	NA	NA	NA	NA	NA	NA	F33G12.4	K12H6.11	Y47D7A.8	NA	NA	NA	NA	NA	NA	NA	NA	K08F4.4	H34I24.2	F08G5.3	F08F3.1	T02B11.4	T28C6.5	NA	NA	NA	NA	NA	NA	NA	T27E9.7	K08F9.5	NA	F53F8.5	NA	NA	NA	NA	NA	NA	NA	K07C5.9	NA	NA	NA	NA	NA
C05C10.6	K08F4.3	NA	NA	NA	NA	NA	NA	NA	F33H1.2	K12H6.2	Y47G6A.14	NA	NA	NA	NA	NA	NA	NA	NA	K08F8.1	H34I24.3	F08G5.4	F08F3.4	T02C5.5	T28D9.10	NA	NA	NA	NA	NA	NA	NA	T28B11.1	K08H10.7	NA	F53G12.5	NA	NA	NA	NA	NA	NA	NA	K07D4.5	NA	NA	NA	NA	NA
C05C10.7	K08F9.4	NA	NA	NA	NA	NA	NA	NA	F33H1.3	LLC1.1	Y47H10A.1	NA	NA	NA	NA	NA	NA	NA	NA	K08F8.3	H40L08.3	F08H9.12	F08F3.7	T02D1.7	T28F12.2	NA	NA	NA	NA	NA	NA	NA	T28F2.7	K09A11.2	NA	F53H1.3	NA	NA	NA	NA	NA	NA	NA	K07D4.6	NA	NA	NA	NA	NA
C05C10.8	K08H2.3	NA	NA	NA	NA	NA	NA	NA	F33H1.4	LLC1.3	Y47H9B.2	NA	NA	NA	NA	NA	NA	NA	NA	K08F8.4	H43E16.1	F08H9.5	F08F8.5	T02E9.3	T28F2.2	NA	NA	NA	NA	NA	NA	NA	T28H10.3	K09A11.3	NA	F53H4.1	NA	NA	NA	NA	NA	NA	NA	K07D8.1	NA	NA	NA	NA	NA
C05C12.1	K09E3.7	NA	NA	NA	NA	NA	NA	NA	F33H2.2	M01A10.1	Y48D7A.1	NA	NA	NA	NA	NA	NA	NA	NA	K08F8.7	K01A11.1	F08H9.7	F08G12.8	T03D3.6	T28F2.4	NA	NA	NA	NA	NA	NA	NA	VC5.2	K09C8.3	NA	F54A3.2	NA	NA	NA	NA	NA	NA	NA	K07E12.1	NA	NA	NA	NA	NA
C05C12.3	K09E4.3	NA	NA	NA	NA	NA	NA	NA	F34D10.2	M01D7.9	Y48G1C.6	NA	NA	NA	NA	NA	NA	NA	NA	K09A9.6	K01A12.3	F08H9.8	F08G2.5	T03E6.6	T28H10.1	NA	NA	NA	NA	NA	NA	NA	VM106R.1	K09D9.9	NA	F54A3.5	NA	NA	NA	NA	NA	NA	NA	K07G5.4	NA	NA	NA	NA	NA
C05C12.4	K09H11.3	NA	NA	NA	NA	NA	NA	NA	F34D10.4	M01E11.4	Y48G9A.7	NA	NA	NA	NA	NA	NA	NA	NA	K09B11.10	K01A2.11	F08H9.9	F08G5.3	T03F6.5	VH15N14R.1	NA	NA	NA	NA	NA	NA	NA	W01A11.6	K09E2.1	NA	F54C1.2	NA	NA	NA	NA	NA	NA	NA	K07H8.8	NA	NA	NA	NA	NA
C05C12.5	K10B2.5	NA	NA	NA	NA	NA	NA	NA	F35C11.2	M01E11.6	Y49A3A.3	NA	NA	NA	NA	NA	NA	NA	NA	K09C4.5	K01A2.7	F09A5.2	F08G5.4	T03F6.9	VK10D6R.1	NA	NA	NA	NA	NA	NA	NA	W02A11.8	K09H11.6	NA	F54C1.3	NA	NA	NA	NA	NA	NA	NA	K08B5.2	NA	NA	NA	NA	NA
C05C12.6	K10C8.3	NA	NA	NA	NA	NA	NA	NA	F35C11.5	M01E5.3	Y49C4A.6	NA	NA	NA	NA	NA	NA	NA	NA	K09C8.1	K01B6.1	F09B12.5	F08G5.6	T03G11.1	W01A11.5	NA	NA	NA	NA	NA	NA	NA	W02D7.11	K09H11.7	NA	F54C4.1	NA	NA	NA	NA	NA	NA	NA	K08C7.4	NA	NA	NA	NA	NA
C05C8.1	K10D2.2	NA	NA	NA	NA	NA	NA	NA	F35C5.1	M01E5.6	Y49C4A.8	NA	NA	NA	NA	NA	NA	NA	NA	K09C8.4	K01D12.3	F09B12.6	F08H9.12	T04A6.1	W02A11.3	NA	NA	NA	NA	NA	NA	NA	W02D9.10	K09H9.8	NA	F54C4.2	NA	NA	NA	NA	NA	NA	NA	K08C7.6	NA	NA	NA	NA	NA
C05C8.2	K10D2.3	NA	NA	NA	NA	NA	NA	NA	F35C8.7	M01G5.1	Y49C4A.9	NA	NA	NA	NA	NA	NA	NA	NA	K09D9.2	K01D12.4	F09B9.1	F08H9.5	T04A6.2	W02A2.9	NA	NA	NA	NA	NA	NA	NA	W02H5.8	K10B4.4	NA	F54C4.3	NA	NA	NA	NA	NA	NA	NA	K08C7.7	NA	NA	NA	NA	NA
C05C8.3	K10D2.4	NA	NA	NA	NA	NA	NA	NA	F35D11.5	M01G5.3	Y49E10.30	NA	NA	NA	NA	NA	NA	NA	NA	K09E10.1	K02A2.3	F09B9.4	F08H9.7	T04A8.9	W02B12.8	NA	NA	NA	NA	NA	NA	NA	W03B1.3	K10B4.5	NA	F54C8.4	NA	NA	NA	NA	NA	NA	NA	K08C9.4	NA	NA	NA	NA	NA
C05C8.4	K10D3.3	NA	NA	NA	NA	NA	NA	NA	F35D6.1	M01G5.5	Y49E10.4	NA	NA	NA	NA	NA	NA	NA	NA	K09E3.6	K02B7.4	F09C12.1	F08H9.8	T04B2.6	W02B8.2	NA	NA	NA	NA	NA	NA	NA	W03G11.2	K10C9.1	NA	F54C8.5	NA	NA	NA	NA	NA	NA	NA	K08D12.4	NA	NA	NA	NA	NA
C05C8.5	K10H10.1	NA	NA	NA	NA	NA	NA	NA	F35F10.12	M02B1.3	Y49F6A.1	NA	NA	NA	NA	NA	NA	NA	NA	K09F6.7	K02D3.2	F09C12.2	F08H9.9	T04D1.3	W02D3.9	NA	NA	NA	NA	NA	NA	NA	W04A8.2	K10D2.6	NA	F54C9.8	NA	NA	NA	NA	NA	NA	NA	K08D12.8	NA	NA	NA	NA	NA
C05C8.6	K11D12.2	NA	NA	NA	NA	NA	NA	NA	F35G12.1	M02B7.1	Y49F6B.3	NA	NA	NA	NA	NA	NA	NA	NA	K09F6.9	K02D7.4	F09C12.8	F09A5.2	T04H1.7	W02H5.7	NA	NA	NA	NA	NA	NA	NA	W04D2.2	K10G6.1	NA	F54D10.5	NA	NA	NA	NA	NA	NA	NA	K08E7.5	NA	NA	NA	NA	NA
C05C8.7	K11D12.5	NA	NA	NA	NA	NA	NA	NA	F35G12.10	M02B7.4	Y49F6B.5	NA	NA	NA	NA	NA	NA	NA	NA	K10B2.2	K02E10.7	F09C3.1	F09A5.9	T05A8.3	W03G1.5	NA	NA	NA	NA	NA	NA	NA	W04G5.8	K10H10.5	NA	F54D10.7	NA	NA	NA	NA	NA	NA	NA	K08F4.7	NA	NA	NA	NA	NA
C05C8.8	K11D2.4	NA	NA	NA	NA	NA	NA	NA	F35G12.12	M03C11.4	Y50D4A.2	NA	NA	NA	NA	NA	NA	NA	NA	K10B3.7	K02E11.10	F09C6.11	F09B12.3	T05A8.8	W04A4.6	NA	NA	NA	NA	NA	NA	NA	W05B10.6	K11B4.1	NA	F54D11.4	NA	NA	NA	NA	NA	NA	NA	K08H10.10	NA	NA	NA	NA	NA
C05C8.9	K11D9.1	NA	NA	NA	NA	NA	NA	NA	F35G12.2	M03E7.5	Y50D4B.2	NA	NA	NA	NA	NA	NA	NA	NA	K10B3.8	K02E2.2	F09C6.12	F09B12.7	T05B4.8	W04A8.3	NA	NA	NA	NA	NA	NA	NA	W05B5.2	K11D12.8	NA	F54D12.4	NA	NA	NA	NA	NA	NA	NA	K09A9.2	NA	NA	NA	NA	NA
C05C9.1	K11E4.5	NA	NA	NA	NA	NA	NA	NA	F35G12.3	M04G7.3	Y50D4C.2	NA	NA	NA	NA	NA	NA	NA	NA	K10B3.9	K02E2.8	F09C6.3	F09B9.1	T05C1.4	W04A8.5	NA	NA	NA	NA	NA	NA	NA	W05E10.2	K11D9.3	NA	F54D12.6	NA	NA	NA	NA	NA	NA	NA	K09C4.9	NA	NA	NA	NA	NA
C05C9.2	K11H12.8	NA	NA	NA	NA	NA	NA	NA	F35G12.5	M05D6.2	Y51B9A.3	NA	NA	NA	NA	NA	NA	NA	NA	K10C2.1	K02E7.1	F09C8.1	F09B9.4	T05C12.7	W04A8.9	NA	NA	NA	NA	NA	NA	NA	W05E10.5	K11G12.3	NA	F54D5.14	NA	NA	NA	NA	NA	NA	NA	K09D9.1	NA	NA	NA	NA	NA
C05C9.3	K11H3.4	NA	NA	NA	NA	NA	NA	NA	F35G2.1	M106.2	Y51B9A.4	NA	NA	NA	NA	NA	NA	NA	NA	K10D11.3	K02G10.7	F09D12.1	F09C12.1	T05C12.8	W04E12.1	NA	NA	NA	NA	NA	NA	NA	W05F2.7	K11G9.1	NA	F54D5.9	NA	NA	NA	NA	NA	NA	NA	K09E9.1	NA	NA	NA	NA	NA
C05D10.1	K12D12.5	NA	NA	NA	NA	NA	NA	NA	F35G2.2	M106.8	Y51F10.5	NA	NA	NA	NA	NA	NA	NA	NA	K10D3.2	K02H11.4	F09E10.7	F09C12.8	T05C3.2	W05E10.3	NA	NA	NA	NA	NA	NA	NA	W05H9.1	K11G9.6	NA	F54D7.2	NA	NA	NA	NA	NA	NA	NA	K10C2.2	NA	NA	NA	NA	NA
C05D10.2	K12H4.2	NA	NA	NA	NA	NA	NA	NA	F35H10.6	M110.3	Y51H1A.1	NA	NA	NA	NA	NA	NA	NA	NA	K10G6.2	K03A11.2	F09E8.6	F09C3.2	T05H4.13	W05H12.2	NA	NA	NA	NA	NA	NA	NA	W06A11.4	K11H12.7	NA	F54F2.5	NA	NA	NA	NA	NA	NA	NA	K10C2.5	NA	NA	NA	NA	NA
C05D10.3	K12H6.2	NA	NA	NA	NA	NA	NA	NA	F35H10.7	M151.1	Y51H4A.22	NA	NA	NA	NA	NA	NA	NA	NA	K10G9.1	K03A11.4	F09E8.7	F09C6.11	T05H4.3	W05H9.1	NA	NA	NA	NA	NA	NA	NA	W06B4.2	K11H3.1	NA	F54F2.8	NA	NA	NA	NA	NA	NA	NA	K10C3.3	NA	NA	NA	NA	NA
C05D10.4	LLC1.3	NA	NA	NA	NA	NA	NA	NA	F35H12.4	M151.5	Y51H7BR.1	NA	NA	NA	NA	NA	NA	NA	NA	K11C4.2	K03A11.6	F09E8.8	F09C6.12	T06A4.3	W05H9.4	NA	NA	NA	NA	NA	NA	NA	W06D4.4	K11H3.5	NA	F54F7.5	NA	NA	NA	NA	NA	NA	NA	K10D11.3	NA	NA	NA	NA	NA
C05D11.1	M01B12.3	NA	NA	NA	NA	NA	NA	NA	F35H8.3	M151.7	Y51H7BR.2	NA	NA	NA	NA	NA	NA	NA	NA	K11D12.3	K03B8.6	F09F3.6	F09C8.1	T06C12.8	W06B11.2	NA	NA	NA	NA	NA	NA	NA	W06G6.6	K11H3.7	NA	F55A11.1	NA	NA	NA	NA	NA	NA	NA	K10D11.7	NA	NA	NA	NA	NA
C05D11.10	M01B12.4	NA	NA	NA	NA	NA	NA	NA	F36A2.13	M162.6	Y51H7C.15	NA	NA	NA	NA	NA	NA	NA	NA	K11E8.1	K03B8.8	F09F7.1	F09D12.1	T06C12.9	W06E11.2	NA	NA	NA	NA	NA	NA	NA	W06G6.9	K12B6.1	NA	F55A11.3	NA	NA	NA	NA	NA	NA	NA	K10D3.2	NA	NA	NA	NA	NA
C05D11.11	M01D7.6	NA	NA	NA	NA	NA	NA	NA	F36A2.9	M176.3	Y52B11A.8	NA	NA	NA	NA	NA	NA	NA	NA	K11G12.2	K03B8.9	F09F9.1	F09E10.7	T06D10.1	W07E6.1	NA	NA	NA	NA	NA	NA	NA	W06H8.6	K12C11.6	NA	F55A11.7	NA	NA	NA	NA	NA	NA	NA	K10F12.4	NA	NA	NA	NA	NA
C05D11.12	M01E11.3	NA	NA	NA	NA	NA	NA	NA	F36D4.5	M18.3	Y53F4B.12	NA	NA	NA	NA	NA	NA	NA	NA	K11H12.11	K03E5.1	F09F9.3	F09E5.16	T06E4.4	W07E6.2	NA	NA	NA	NA	NA	NA	NA	W07E11.2	K12C11.7	NA	F55A11.8	NA	NA	NA	NA	NA	NA	NA	K10F12.7	NA	NA	NA	NA	NA
C05D11.13	M01E11.4	NA	NA	NA	NA	NA	NA	NA	F36F12.8	M57.2	Y53F4B.24	NA	NA	NA	NA	NA	NA	NA	NA	K11H12.2	K03H4.1	F09F9.5	F09E8.6	T06E4.6	W08E3.2	NA	NA	NA	NA	NA	NA	NA	W07E11.4	K12D12.3	NA	F55A12.3	NA	NA	NA	NA	NA	NA	NA	K10G6.5	NA	NA	NA	NA	NA
C05D11.2	M01E11.5	NA	NA	NA	NA	NA	NA	NA	F36H1.4	M7.1	Y53F4B.43	NA	NA	NA	NA	NA	NA	NA	NA	K12C11.4	K03H6.1	F09G8.10	F09E8.7	T06F4.1	W08E3.4	NA	NA	NA	NA	NA	NA	NA	W07E6.5	K12G11.1	NA	F55A12.5	NA	NA	NA	NA	NA	NA	NA	K10G9.2	NA	NA	NA	NA	NA
C05D11.3	M01E11.6	NA	NA	NA	NA	NA	NA	NA	F36H12.2	M70.4	Y53G8AR.6	NA	NA	NA	NA	NA	NA	NA	NA	K12D9.5	K03H6.5	F09G8.5	F09E8.8	T06H11.5	W08F4.12	NA	NA	NA	NA	NA	NA	NA	W07G4.5	M01A8.1	NA	F55A3.1	NA	NA	NA	NA	NA	NA	NA	K10H10.1	NA	NA	NA	NA	NA
C05D11.4	M01F1.4	NA	NA	NA	NA	NA	NA	NA	F36H12.4	R01B10.6	Y53H1C.1	NA	NA	NA	NA	NA	NA	NA	NA	K12F2.2	K03H9.3	F09G8.9	F09F3.6	T07A5.1	W08F4.13	NA	NA	NA	NA	NA	NA	NA	W07G4.6	M01F1.4	NA	F55A3.3	NA	NA	NA	NA	NA	NA	NA	K10H10.10	NA	NA	NA	NA	NA
C05D11.5	M01F1.8	NA	NA	NA	NA	NA	NA	NA	F36H2.2	R01H10.7	Y54F10BM.12	NA	NA	NA	NA	NA	NA	NA	NA	K12G11.3	K04D7.6	F10A3.4	F09F3.9	T07C4.7	W08F4.2	NA	NA	NA	NA	NA	NA	NA	W08A12.1	M01F1.5	NA	F55B12.3	NA	NA	NA	NA	NA	NA	NA	K10H10.4	NA	NA	NA	NA	NA
C05D11.6	M01F1.9	NA	NA	NA	NA	NA	NA	NA	F36H9.3	R01H2.6	Y54F10BM.13	NA	NA	NA	NA	NA	NA	NA	NA	LLC1.2	K04E7.1	F10A3.7	F09F7.1	T07D10.1	W09C2.1	NA	NA	NA	NA	NA	NA	NA	W08E3.3	M02A10.2	NA	F55C5.7	NA	NA	NA	NA	NA	NA	NA	K11C4.5	NA	NA	NA	NA	NA
C05D11.7	M01G5.6	NA	NA	NA	NA	NA	NA	NA	F37A4.9	R02C2.1	Y54F10BM.6	NA	NA	NA	NA	NA	NA	NA	NA	M01A12.1	K04E7.2	F10C2.3	F09F7.2	T07F10.1	W09C2.3	NA	NA	NA	NA	NA	NA	NA	W09C2.3	M02B1.2	NA	F55C5.8	NA	NA	NA	NA	NA	NA	NA	K11E4.3	NA	NA	NA	NA	NA
C05D11.8	M01H9.3	NA	NA	NA	NA	NA	NA	NA	F37B12.3	R02C2.2	Y54G2A.22	NA	NA	NA	NA	NA	NA	NA	NA	M01A12.3	K04F1.11	F10D11.6	F09F7.8	T07H3.1	W09D6.1	NA	NA	NA	NA	NA	NA	NA	W09D6.2	M02H5.11	NA	F55F8.4	NA	NA	NA	NA	NA	NA	NA	K11E8.1	NA	NA	NA	NA	NA
C05D11.9	M02B1.3	NA	NA	NA	NA	NA	NA	NA	F37D6.2	R02D3.2	Y55B1AR.3	NA	NA	NA	NA	NA	NA	NA	NA	M01A8.2	K04G11.2	F10D2.9	F09F9.1	T07H3.2	W09G12.4	NA	NA	NA	NA	NA	NA	NA	W09G12.9	M03A1.8	NA	F55F8.6	NA	NA	NA	NA	NA	NA	NA	K11G12.2	NA	NA	NA	NA	NA
C05D12.1	M02B7.1	NA	NA	NA	NA	NA	NA	NA	F38A5.13	R02D3.4	Y55B1AR.4	NA	NA	NA	NA	NA	NA	NA	NA	M01E11.7	K04H4.2	F10E7.10	F09F9.3	T07H6.5	W10C8.2	NA	NA	NA	NA	NA	NA	NA	W10D5.1	M03B6.1	NA	F55F8.9	NA	NA	NA	NA	NA	NA	NA	K11G12.7	NA	NA	NA	NA	NA
C05D12.2	M02B7.4	NA	NA	NA	NA	NA	NA	NA	F38B7.5	R02D3.5	Y55F3AM.3	NA	NA	NA	NA	NA	NA	NA	NA	M01F1.5	K04H4.5	F10E9.1	F09F9.5	T07H8.4	W10D9.1	NA	NA	NA	NA	NA	NA	NA	W10D5.3	M03F8.6	NA	F55H2.7	NA	NA	NA	NA	NA	NA	NA	K12C11.3	NA	NA	NA	NA	NA
C05D12.3	M03A1.6	NA	NA	NA	NA	NA	NA	NA	F38E1.7	R02F11.4	Y55F3C.2	NA	NA	NA	NA	NA	NA	NA	NA	M01G12.9	K05B2.3	F10E9.10	F09G8.10	T08A9.10	W10D9.2	NA	NA	NA	NA	NA	NA	NA	Y105E8A.23	M04C9.1	NA	F56A11.5	NA	NA	NA	NA	NA	NA	NA	K12F2.1	NA	NA	NA	NA	NA
C05D12.4	M03C11.2	NA	NA	NA	NA	NA	NA	NA	F38E1.9	R03D7.4	Y56A3A.10	NA	NA	NA	NA	NA	NA	NA	NA	M01H9.1	K05B2.5	F10F2.2	F09G8.5	T08A9.12	Y102A11A.7	NA	NA	NA	NA	NA	NA	NA	Y106G6A.1	M04D5.3	NA	F56A3.2	NA	NA	NA	NA	NA	NA	NA	K12F2.2	NA	NA	NA	NA	NA
C05D12.5	M03F8.2	NA	NA	NA	NA	NA	NA	NA	F38H12.3	R04D3.2	Y56A3A.15	NA	NA	NA	NA	NA	NA	NA	NA	M02B7.6	K05F1.1	F10F2.3	F09G8.6	T08A9.2	Y102A11A.8	NA	NA	NA	NA	NA	NA	NA	Y106G6H.2	M04D8.1	NA	F56A8.4	NA	NA	NA	NA	NA	NA	NA	M01A12.1	NA	NA	NA	NA	NA
C05D12.7	M05D6.2	NA	NA	NA	NA	NA	NA	NA	F38H4.10	R05D11.3	Y56A3A.33	NA	NA	NA	NA	NA	NA	NA	NA	M02F4.3	K05F1.9	F10F2.4	F09G8.9	T08B1.2	Y105C5A.1	NA	NA	NA	NA	NA	NA	NA	Y106G6H.5	M05D6.8	NA	F56B3.12	NA	NA	NA	NA	NA	NA	NA	M01A8.2	NA	NA	NA	NA	NA
C05D2.1	M106.2	NA	NA	NA	NA	NA	NA	NA	F38H4.8	R05D11.7	Y57A10A.31	NA	NA	NA	NA	NA	NA	NA	NA	M02F4.8	K06A1.6	F10F2.9	F10A3.3	T08G11.1	Y105C5A.10	NA	NA	NA	NA	NA	NA	NA	Y110A2AL.9	M05D6.9	NA	F56B3.8	NA	NA	NA	NA	NA	NA	NA	M01B2.8	NA	NA	NA	NA	NA
C05D2.10	M106.3	NA	NA	NA	NA	NA	NA	NA	F39B2.10	R05D11.9	Y57A10A.7	NA	NA	NA	NA	NA	NA	NA	NA	M02G9.1	K06A4.2	F10G2.1	F10A3.4	T08G11.3	Y105C5A.11	NA	NA	NA	NA	NA	NA	NA	Y110A7A.5	M110.8	NA	F56C11.5	NA	NA	NA	NA	NA	NA	NA	M01F1.7	NA	NA	NA	NA	NA
C05D2.3	M106.4	NA	NA	NA	NA	NA	NA	NA	F39H11.5	R05G6.7	Y57A10A.9	NA	NA	NA	NA	NA	NA	NA	NA	M03A8.3	K06A9.1	F10G8.4	F10C1.8	T09A12.3	Y105C5A.1272	NA	NA	NA	NA	NA	NA	NA	Y110A7A.7	M176.11	NA	F56C9.10	NA	NA	NA	NA	NA	NA	NA	M01G12.9	NA	NA	NA	NA	NA
C05D2.4	M106.8	NA	NA	NA	NA	NA	NA	NA	F39H2.2	R05H10.3	Y57A10B.6	NA	NA	NA	NA	NA	NA	NA	NA	M03B6.2	K06A9.2	F11A5.5	F10D11.6	T09B4.3	Y105C5B.13	NA	NA	NA	NA	NA	NA	NA	Y113G7A.12	M176.4	NA	F56C9.11	NA	NA	NA	NA	NA	NA	NA	M01H9.4	NA	NA	NA	NA	NA
C05D2.5	M116.5	NA	NA	NA	NA	NA	NA	NA	F39H2.3	R05H5.3	Y57A10C.11	NA	NA	NA	NA	NA	NA	NA	NA	M03B6.3	K06B4.1	F11C1.4	F10D2.9	T09D3.4	Y105C5B.9	NA	NA	NA	NA	NA	NA	NA	Y113G7B.4	M176.7	NA	F56C9.3	NA	NA	NA	NA	NA	NA	NA	M02B1.1	NA	NA	NA	NA	NA
C05D2.6	M117.2	NA	NA	NA	NA	NA	NA	NA	F39H2.4	R05H5.4	Y57G11C.1130	NA	NA	NA	NA	NA	NA	NA	NA	M03C11.1	K06B4.2	F11C3.2	F10D7.1	T09E8.4	Y105E8B.7	NA	NA	NA	NA	NA	NA	NA	Y113G7B.7	M176.8	NA	F56C9.6	NA	NA	NA	NA	NA	NA	NA	M02F4.3	NA	NA	NA	NA	NA
C05D2.8	M151.3	NA	NA	NA	NA	NA	NA	NA	F39H2.5	R06A4.4	Y57G11C.1134	NA	NA	NA	NA	NA	NA	NA	NA	M03F4.3	K06B4.5	F11C7.3	F10E7.10	T10A3.1	Y106G6D.1	NA	NA	NA	NA	NA	NA	NA	Y116A8B.5	M18.2	NA	F56D1.1	NA	NA	NA	NA	NA	NA	NA	M02G9.1	NA	NA	NA	NA	NA
C05D9.1	M151.7	NA	NA	NA	NA	NA	NA	NA	F40A3.3	R06A4.6	Y57G11C.25	NA	NA	NA	NA	NA	NA	NA	NA	M03F8.4	K06B4.6	F11E6.11	F10E9.1	T10B11.2	Y106G6D.2	NA	NA	NA	NA	NA	NA	NA	Y116A8C.25	M195.3	NA	F56D1.2	NA	NA	NA	NA	NA	NA	NA	M02G9.2	NA	NA	NA	NA	NA
C05D9.2	M18.8	NA	NA	NA	NA	NA	NA	NA	F40E3.2	R06A4.7	Y57G11C.8	NA	NA	NA	NA	NA	NA	NA	NA	M04C3.1	K06G5.1	F11F1.6	F10E9.10	T10B5.5	Y106G6D.7	NA	NA	NA	NA	NA	NA	NA	Y119D3B.9	M199.8	NA	F56D1.3	NA	NA	NA	NA	NA	NA	NA	M02H5.6	NA	NA	NA	NA	NA
C05D9.3	M28.6	NA	NA	NA	NA	NA	NA	NA	F40F11.3	R06C1.1	Y57G11C.9	NA	NA	NA	NA	NA	NA	NA	NA	M04C3.3	K06G5.3	F11G11.3	F10F2.3	T10B5.7	Y106G6H.2	NA	NA	NA	NA	NA	NA	NA	Y15E3A.5	M60.4	NA	F56D1.7	NA	NA	NA	NA	NA	NA	NA	M02H5.7	NA	NA	NA	NA	NA
C05D9.4	M4.1	NA	NA	NA	NA	NA	NA	NA	F40F12.5	R06C7.9	Y57G7A.2	NA	NA	NA	NA	NA	NA	NA	NA	M04G12.2	K07A9.2	F11H8.2	F10F2.4	T10B9.10	Y106G6H.4	NA	NA	NA	NA	NA	NA	NA	Y16E11A.1	M60.6	NA	F56D12.6	NA	NA	NA	NA	NA	NA	NA	M03A8.3	NA	NA	NA	NA	NA
C05D9.5	M7.1	NA	NA	NA	NA	NA	NA	NA	F40F8.1	R06F6.5	Y57G7A.7	NA	NA	NA	NA	NA	NA	NA	NA	M04G7.1	K07D4.6	F12A10.5	F10F2.9	T10B9.2	Y110A7A.7	NA	NA	NA	NA	NA	NA	NA	Y17D7A.1	M7.3	NA	F56D2.7	NA	NA	NA	NA	NA	NA	NA	M03A8.4	NA	NA	NA	NA	NA
C05D9.7	M7.2	NA	NA	NA	NA	NA	NA	NA	F40F9.1	R07C3.12	Y57G7A.8	NA	NA	NA	NA	NA	NA	NA	NA	M05B5.3	K07E12.1	F12B6.1	F10G2.1	T10B9.4	Y111B2A.27	NA	NA	NA	NA	NA	NA	NA	Y17G7B.6	M79.2	NA	F56G4.5	NA	NA	NA	NA	NA	NA	NA	M03E7.4	NA	NA	NA	NA	NA
C05D9.9	M70.4	NA	NA	NA	NA	NA	NA	NA	F40G12.11	R07C3.9	Y58G8A.4	NA	NA	NA	NA	NA	NA	NA	NA	M117.1	K07E3.7	F12B6.2	F10G7.7	T10H4.2	Y116A8C.17	NA	NA	NA	NA	NA	NA	NA	Y17G9B.4	MTCE.25	NA	F56H1.4	NA	NA	NA	NA	NA	NA	NA	M03F8.1	NA	NA	NA	NA	NA
C05E11.1	M88.5	NA	NA	NA	NA	NA	NA	NA	F40G9.1	R07E5.11	Y59E1A.2	NA	NA	NA	NA	NA	NA	NA	NA	M142.2	K07G5.4	F12B6.3	F11C1.10	T10H4.9	Y116A8C.19	NA	NA	NA	NA	NA	NA	NA	Y19D10A.7	MTCE.26	NA	F56H1.5	NA	NA	NA	NA	NA	NA	NA	M04D8.3	NA	NA	NA	NA	NA
C05E11.3	M88.7	NA	NA	NA	NA	NA	NA	NA	F40G9.11	R07G3.5	Y5H2B.3	NA	NA	NA	NA	NA	NA	NA	NA	M153.4	K07H8.5	F12D9.1	F11C1.3	T10H9.4	Y116A8C.33	NA	NA	NA	NA	NA	NA	NA	Y1B5A.1	R01B10.1	NA	F56H1.6	NA	NA	NA	NA	NA	NA	NA	M05B5.6	NA	NA	NA	NA	NA
C05E11.4	PAR2.1	NA	NA	NA	NA	NA	NA	NA	F40G9.3	R08E5.2	Y60A9.3	NA	NA	NA	NA	NA	NA	NA	NA	M162.5	K07H8.8	F12F3.1	F11C1.4	T11F1.7	Y116A8C.34	NA	NA	NA	NA	NA	NA	NA	Y20C6A.1	R01E6.6	NA	F56H1.7	NA	NA	NA	NA	NA	NA	NA	M110.5	NA	NA	NA	NA	NA
C05E11.5	PAR2.3	NA	NA	NA	NA	NA	NA	NA	F40G9.9	R09A1.1	Y62E10A.17	NA	NA	NA	NA	NA	NA	NA	NA	M163.5	K08B12.1	F13A2.1	F11C7.7	T11F9.12	Y116A8C.35	NA	NA	NA	NA	NA	NA	NA	Y22D7AL.15	R01H10.4	NA	F57A10.3	NA	NA	NA	NA	NA	NA	NA	M110.9	NA	NA	NA	NA	NA
C05E11.6	R01H2.3	NA	NA	NA	NA	NA	NA	NA	F40H3.1	R09A8.2	Y63D3A.10	NA	NA	NA	NA	NA	NA	NA	NA	M28.10	K08B5.1	F13A2.2	F11D11.3	T11F9.2	Y116A8C.43	NA	NA	NA	NA	NA	NA	NA	Y22D7AL.16	R01H2.7	NA	F57A10.4	NA	NA	NA	NA	NA	NA	NA	M153.4	NA	NA	NA	NA	NA
C05E11.7	R02D3.7	NA	NA	NA	NA	NA	NA	NA	F41B4.3	R09B3.1	Y63D3A.9	NA	NA	NA	NA	NA	NA	NA	NA	M28.8	K08C7.2	F13A7.11	F11E6.11	T11F9.21	Y116F11A.1	NA	NA	NA	NA	NA	NA	NA	Y22D7AR.13	R02D1.1	NA	F57B1.2	NA	NA	NA	NA	NA	NA	NA	M176.5	NA	NA	NA	NA	NA
C05E11.8	R02D5.8	NA	NA	NA	NA	NA	NA	NA	F41C3.3	R09B3.4	Y64G10A.10	NA	NA	NA	NA	NA	NA	NA	NA	M6.4	K08D12.2	F13A7.12	F11E6.3	T12A7.4	Y17G9B.1	NA	NA	NA	NA	NA	NA	NA	Y23H5B.4	R02D3.6	NA	F57B10.12	NA	NA	NA	NA	NA	NA	NA	M195.2	NA	NA	NA	NA	NA
C05E4.1	R02E12.2	NA	NA	NA	NA	NA	NA	NA	F41F3.2	R09H3.3	Y66A7A.8	NA	NA	NA	NA	NA	NA	NA	NA	M60.5	K08D12.8	F13B12.4	F11E6.6	T12A7.5	Y19D10A.11	NA	NA	NA	NA	NA	NA	NA	Y26G10.1	R02D5.3	NA	F57B10.4	NA	NA	NA	NA	NA	NA	NA	MTCE.12	NA	NA	NA	NA	NA
C05E4.12	R02F2.4	NA	NA	NA	NA	NA	NA	NA	F41G3.6	R10F2.6	Y66D12A.19	NA	NA	NA	NA	NA	NA	NA	NA	M60.6	K08D8.3	F13B12.5	F11G11.3	T12C9.3	Y20C6A.2	NA	NA	NA	NA	NA	NA	NA	Y27F2A.2	R03A10.6	NA	F57B10.7	NA	NA	NA	NA	NA	NA	NA	MTCE.3	NA	NA	NA	NA	NA
C05E4.13	R03D7.1	NA	NA	NA	NA	NA	NA	NA	F41H10.10	R119.2	Y67H2A.8	NA	NA	NA	NA	NA	NA	NA	NA	PDB1.1	K08E5.2	F13B6.1	F11H8.2	T12D8.9	Y20F4.5	NA	NA	NA	NA	NA	NA	NA	Y2H9A.2	R03H4.5	NA	F57B9.10	NA	NA	NA	NA	NA	NA	NA	R01B10.3	NA	NA	NA	NA	NA
C05E4.14	R03D7.7	NA	NA	NA	NA	NA	NA	NA	F41H10.11	R119.6	Y69A2AR.16	NA	NA	NA	NA	NA	NA	NA	NA	R01E6.1	K08E7.5	F13B6.2	F12A10.5	T13F3.7	Y22F5A.1	NA	NA	NA	NA	NA	NA	NA	Y32F6B.2	R04B5.3	NA	F57C2.2	NA	NA	NA	NA	NA	NA	NA	R01E6.1	NA	NA	NA	NA	NA
C05E4.2	R04B5.4	NA	NA	NA	NA	NA	NA	NA	F41H10.6	R119.7	Y6D1A.1	NA	NA	NA	NA	NA	NA	NA	NA	R01E6.2	K08E7.7	F13B6.3	F12B6.1	T13G4.3	Y23H5B.1	NA	NA	NA	NA	NA	NA	NA	Y32G9A.13	R04D3.9	NA	F57C2.3	NA	NA	NA	NA	NA	NA	NA	R01E6.2	NA	NA	NA	NA	NA
C05E4.3	R04D3.3	NA	NA	NA	NA	NA	NA	NA	F42A10.4	R11D1.1	Y6G8.2	NA	NA	NA	NA	NA	NA	NA	NA	R01E6.4	K08F4.4	F13B9.2	F12B6.2	T13G4.7	Y23H5B.7	NA	NA	NA	NA	NA	NA	NA	Y32H12A.7	R04F11.1	NA	F57C2.6	NA	NA	NA	NA	NA	NA	NA	R01E6.4	NA	NA	NA	NA	NA
C05E4.9	R04F11.3	NA	NA	NA	NA	NA	NA	NA	F42A10.5	R11H6.1	Y6G8.3	NA	NA	NA	NA	NA	NA	NA	NA	R01H10.3	K08F8.3	F13C5.3	F12B6.3	T15B7.1	Y26E6A.3	NA	NA	NA	NA	NA	NA	NA	Y36E3A.1	R05A10.1	NA	F57C9.4	NA	NA	NA	NA	NA	NA	NA	R01E6.7	NA	NA	NA	NA	NA
C05E7.1	R05D11.3	NA	NA	NA	NA	NA	NA	NA	F42A8.2	R11H6.5	Y71A12B.2	NA	NA	NA	NA	NA	NA	NA	NA	R01H10.4	K09B11.10	F13D11.1	F12D9.1	T15B7.16	Y27F2A.6	NA	NA	NA	NA	NA	NA	NA	Y37A1B.11	R05C11.3	NA	F57C9.5	NA	NA	NA	NA	NA	NA	NA	R01H10.3	NA	NA	NA	NA	NA
C05E7.2	R05D11.8	NA	NA	NA	NA	NA	NA	NA	F42A8.3	R12C12.5	Y71A12B.3	NA	NA	NA	NA	NA	NA	NA	NA	R01H10.6	K09C4.7	F13D11.4	F12F3.1	T15B7.6	Y27F2A.8	NA	NA	NA	NA	NA	NA	NA	Y37A1B.5	R05D8.7	NA	F57C9.7	NA	NA	NA	NA	NA	NA	NA	R02D5.9	NA	NA	NA	NA	NA
C05E7.3	R05F9.1	NA	NA	NA	NA	NA	NA	NA	F42A9.1	R12E2.1	Y71A12B.8	NA	NA	NA	NA	NA	NA	NA	NA	R02E12.4	K09C8.4	F13D12.10	F13A2.1	T16G1.1	Y32H12A.3	NA	NA	NA	NA	NA	NA	NA	Y37B11A.2	R05G6.8	NA	F58A4.2	NA	NA	NA	NA	NA	NA	NA	R02E12.4	NA	NA	NA	NA	NA
C05E7.4	R05F9.10	NA	NA	NA	NA	NA	NA	NA	F42A9.6	R12E2.10	Y71G12B.30	NA	NA	NA	NA	NA	NA	NA	NA	R02E12.5	K09D9.2	F13D12.8	F13A2.2	T16G1.7	Y34D9A.4	NA	NA	NA	NA	NA	NA	NA	Y37E11AL.1	R05H10.5	NA	F58A4.6	NA	NA	NA	NA	NA	NA	NA	R02E12.8	NA	NA	NA	NA	NA
C05G5.1	R05F9.11	NA	NA	NA	NA	NA	NA	NA	F42A9.8	R13A1.7	Y71G12B.5	NA	NA	NA	NA	NA	NA	NA	NA	R02F11.1	K09E9.4	F13E6.2	F13A7.11	T16G12.1	Y37A1B.5	NA	NA	NA	NA	NA	NA	NA	Y37E11B.5	R05H11.2	NA	F58B3.6	NA	NA	NA	NA	NA	NA	NA	R02E4.2	NA	NA	NA	NA	NA
C05G5.2	R05F9.6	NA	NA	NA	NA	NA	NA	NA	F42G4.7	R144.10	Y71H10A.1	NA	NA	NA	NA	NA	NA	NA	NA	R03E1.2	K09G1.4	F13G3.12	F13B12.5	T16G12.7	Y37E11AR.2	NA	NA	NA	NA	NA	NA	NA	Y37E3.17	R06A10.1	NA	F58B6.3	NA	NA	NA	NA	NA	NA	NA	R02F11.1	NA	NA	NA	NA	NA
C05G5.3	R05G6.7	NA	NA	NA	NA	NA	NA	NA	F42G9.6	R148.4	Y71H2AM.5	NA	NA	NA	NA	NA	NA	NA	NA	R03G5.6	K10B2.2	F13G3.2	F13B6.1	T16H12.9	Y37E11B.2	NA	NA	NA	NA	NA	NA	NA	Y37H2A.4	R07A4.1	NA	F58D5.4	NA	NA	NA	NA	NA	NA	NA	R02F11.3	NA	NA	NA	NA	NA
C05G5.4	R05H10.3	NA	NA	NA	NA	NA	NA	NA	F42H10.7	R151.2	Y71H2B.2	NA	NA	NA	NA	NA	NA	NA	NA	R03G8.3	K10B4.4	F13G3.8	F13B6.2	T17H7.4	Y37H2C.1	NA	NA	NA	NA	NA	NA	NA	Y37H9A.5	R07B5.6	NA	F58E10.1	NA	NA	NA	NA	NA	NA	NA	R03C1.1	NA	NA	NA	NA	NA
C05G5.5	R05H5.3	NA	NA	NA	NA	NA	NA	NA	F42H11.2	R155.1	Y73B6BL.2	NA	NA	NA	NA	NA	NA	NA	NA	R04B3.3	K10C2.1	F13H10.2	F13B6.3	T19C3.3	Y38A10A.5	NA	NA	NA	NA	NA	NA	NA	Y39A1A.5	R07B7.12	NA	F58F12.1	NA	NA	NA	NA	NA	NA	NA	R03E1.1	NA	NA	NA	NA	NA
C05G5.7	R06B9.3	NA	NA	NA	NA	NA	NA	NA	F43C1.2	R17.2	Y73B6BL.5	NA	NA	NA	NA	NA	NA	NA	NA	R04B5.5	K10C2.2	F13H10.5	F13B9.2	T19C3.9	Y38E10A.28	NA	NA	NA	NA	NA	NA	NA	Y39A3B.2	R07B7.16	NA	F58G1.2	NA	NA	NA	NA	NA	NA	NA	R03E1.2	NA	NA	NA	NA	NA
C05G6.1	R06C1.2	NA	NA	NA	NA	NA	NA	NA	F43D2.1	R53.1	Y73C8C.3	NA	NA	NA	NA	NA	NA	NA	NA	R04B5.6	K10C2.8	F13H10.6	F13C5.3	T19D12.1	Y38H6C.11	NA	NA	NA	NA	NA	NA	NA	Y39A3CL.4	R07B7.8	NA	F58G11.1	NA	NA	NA	NA	NA	NA	NA	R03G5.3	NA	NA	NA	NA	NA
C05H8.1	R06C7.1	NA	NA	NA	NA	NA	NA	NA	F43D9.3	R53.5	Y73C8C.8	NA	NA	NA	NA	NA	NA	NA	NA	R04B5.8	K10C8.4	F13H6.1	F13D11.1	T19D12.5	Y39A1A.15	NA	NA	NA	NA	NA	NA	NA	Y39A3CL.6	R07C12.1	NA	F58G11.3	NA	NA	NA	NA	NA	NA	NA	R03H10.6	NA	NA	NA	NA	NA
C06A1.1	R06C7.2	NA	NA	NA	NA	NA	NA	NA	F43D9.4	R74.8	Y73E7A.1	NA	NA	NA	NA	NA	NA	NA	NA	R04E5.10	K10D11.3	F13H6.5	F13D12.10	T19D12.9	Y39G10AL.1	NA	NA	NA	NA	NA	NA	NA	Y39B6A.19	R07G3.8	NA	F58G11.5	NA	NA	NA	NA	NA	NA	NA	R03H10.7	NA	NA	NA	NA	NA
C06A1.2	R06C7.4	NA	NA	NA	NA	NA	NA	NA	F43D9.5	T01B11.3	Y73F8A.36	NA	NA	NA	NA	NA	NA	NA	NA	R04F11.4	K10D3.1	F13H8.5	F13D12.8	T19D2.1	Y39G10AR.10	NA	NA	NA	NA	NA	NA	NA	Y39B6A.33	R08C7.7	NA	F58G11.6	NA	NA	NA	NA	NA	NA	NA	R04B3.3	NA	NA	NA	NA	NA
C06A1.3	R06C7.9	NA	NA	NA	NA	NA	NA	NA	F43E2.7	T01B11.4	Y75B8A.26	NA	NA	NA	NA	NA	NA	NA	NA	R05D7.3	K10D3.2	F14B6.2	F13E9.12	T19D2.2	Y39G10AR.11	NA	NA	NA	NA	NA	NA	NA	Y39C12A.6	R08E5.4	NA	F58H1.3	NA	NA	NA	NA	NA	NA	NA	R04F11.4	NA	NA	NA	NA	NA
C06A1.5	R06F6.12	NA	NA	NA	NA	NA	NA	NA	F43E2.8	T01B7.6	Y75B8A.31	NA	NA	NA	NA	NA	NA	NA	NA	R05G6.1	K10F12.4	F14B6.4	F13E9.14	T19E7.2	Y39G10AR.5	NA	NA	NA	NA	NA	NA	NA	Y39H10A.2	R09A8.5	NA	F58H1.8	NA	NA	NA	NA	NA	NA	NA	R05C11.4	NA	NA	NA	NA	NA
C06A1.6	R07B7.2	NA	NA	NA	NA	NA	NA	NA	F43G6.10	T01C3.8	Y79H2A.3	NA	NA	NA	NA	NA	NA	NA	NA	R05G9R.1	K10G4.5	F14B8.7	F13E9.15	T20B12.5	Y39H10A.6	NA	NA	NA	NA	NA	NA	NA	Y40C5A.4	R09B5.10	NA	F59A2.1	NA	NA	NA	NA	NA	NA	NA	R05D7.1	NA	NA	NA	NA	NA
C06A1.7	R07E5.2	NA	NA	NA	NA	NA	NA	NA	F43G6.5	T01D3.5	Y80D3A.3	NA	NA	NA	NA	NA	NA	NA	NA	R05H5.2	K10G6.2	F14D7.10	F13G3.12	T20B3.15	Y41D4A.3	NA	NA	NA	NA	NA	NA	NA	Y41E3.14	R09B5.2	NA	F59A3.12	NA	NA	NA	NA	NA	NA	NA	R05D8.11	NA	NA	NA	NA	NA
C06A12.3	R07E5.7	NA	NA	NA	NA	NA	NA	NA	F43G6.9	T01E8.4	Y82E9BL.2	NA	NA	NA	NA	NA	NA	NA	NA	R06A10.4	K10G6.5	F14D7.11	F13G3.2	T20B6.3	Y41D4B.9	NA	NA	NA	NA	NA	NA	NA	Y42G9A.3	R09D1.1	NA	F59A3.2	NA	NA	NA	NA	NA	NA	NA	R05G6.11	NA	NA	NA	NA	NA
C06A12.4	R07G3.1	NA	NA	NA	NA	NA	NA	NA	F43G9.1	T01G9.4	Y82E9BL.3	NA	NA	NA	NA	NA	NA	NA	NA	R06B10.3	K10H10.1	F14D7.12	F13G3.8	T20D4.10	Y42H9AR.2	NA	NA	NA	NA	NA	NA	NA	Y43B11AL.2	R09D1.12	NA	F59A3.4	NA	NA	NA	NA	NA	NA	NA	R05G6.12	NA	NA	NA	NA	NA
C06A12.5	R07H5.1	NA	NA	NA	NA	NA	NA	NA	F43G9.13	T01G9.5	Y82E9BL.5	NA	NA	NA	NA	NA	NA	NA	NA	R06C7.3	K11E4.1	F14D7.6	F13H10.1	T20F10.5	Y43B11AL.1	NA	NA	NA	NA	NA	NA	NA	Y43B11AR.1	R09D1.2	NA	F59A7.12	NA	NA	NA	NA	NA	NA	NA	R05G6.5	NA	NA	NA	NA	NA
C06A12.8	R08D7.1	NA	NA	NA	NA	NA	NA	NA	F43G9.2	T01G9.6	Y82E9BL.6	NA	NA	NA	NA	NA	NA	NA	NA	R07A4.4	K11E4.3	F14D7.8	F13H10.2	T20G5.5	Y43F11A.1	NA	NA	NA	NA	NA	NA	NA	Y43B11AR.3	R09D1.3	NA	F59B2.2	NA	NA	NA	NA	NA	NA	NA	R05G6.6	NA	NA	NA	NA	NA
C06A5.1	R08D7.5	NA	NA	NA	NA	NA	NA	NA	F43G9.4	T01H3.3	Y82E9BR.2	NA	NA	NA	NA	NA	NA	NA	NA	R07B1.5	K11G12.2	F14F11.1	F13H10.6	T20G5.7	Y43F11A.4	NA	NA	NA	NA	NA	NA	NA	Y43F8B.14	R09D1.6	NA	F59B2.6	NA	NA	NA	NA	NA	NA	NA	R05G9.2	NA	NA	NA	NA	NA
C06A5.10	R09A8.1	NA	NA	NA	NA	NA	NA	NA	F43G9.5	T02G5.12	Y8A9A.5	NA	NA	NA	NA	NA	NA	NA	NA	R07B1.7	K11G12.3	F14F11.2	F13H6.1	T20H4.1	Y43F8B.12	NA	NA	NA	NA	NA	NA	NA	Y43F8B.23	R09H10.1	NA	F59B2.7	NA	NA	NA	NA	NA	NA	NA	R05H5.7	NA	NA	NA	NA	NA
C06A5.11	R09E12.3	NA	NA	NA	NA	NA	NA	NA	F43G9.9	T02G5.8	Y92C3B.2	NA	NA	NA	NA	NA	NA	NA	NA	R07E3.2	K11G12.7	F14F4.1	F13H8.5	T21B10.2	Y45F10A.3	NA	NA	NA	NA	NA	NA	NA	Y44A6B.2	R09H10.4	NA	F59C6.12	NA	NA	NA	NA	NA	NA	NA	R06A10.2	NA	NA	NA	NA	NA
C06A5.12	R09F10.8	NA	NA	NA	NA	NA	NA	NA	F43H9.3	T02G5.9	Y95B8A.7	NA	NA	NA	NA	NA	NA	NA	NA	R07E3.3	K11G9.2	F14F7.3	F14B6.2	T21B4.15	Y45F10D.11	NA	NA	NA	NA	NA	NA	NA	Y44A6C.1	R102.5	NA	F59C6.4	NA	NA	NA	NA	NA	NA	NA	R06A10.4	NA	NA	NA	NA	NA
C06A5.2	R107.4	NA	NA	NA	NA	NA	NA	NA	F44A2.1	T02G6.6	Y97E10AM.1	NA	NA	NA	NA	NA	NA	NA	NA	R07E3.6	K11G9.3	F14F9.2	F14B8.4	T21B4.8	Y45G5AM.1	NA	NA	NA	NA	NA	NA	NA	Y44A6D.6	R106.2	NA	F59D12.5	NA	NA	NA	NA	NA	NA	NA	R06C7.10	NA	NA	NA	NA	NA
C06A5.3	R107.7	NA	NA	NA	NA	NA	NA	NA	F44B9.4	T03D3.5	Y97E10AR.4	NA	NA	NA	NA	NA	NA	NA	NA	R07E4.1	K11H12.9	F14F9.4	F14B8.7	T21C12.1	Y45G5AM.5	NA	NA	NA	NA	NA	NA	NA	Y45F10D.10	R107.2	NA	F59E10.1	NA	NA	NA	NA	NA	NA	NA	R07A4.2	NA	NA	NA	NA	NA
C06A5.4	R10D12.13	NA	NA	NA	NA	NA	NA	NA	F44B9.7	T03F6.3	Y9C9A.13	NA	NA	NA	NA	NA	NA	NA	NA	R07G3.6	K12B6.4	F14H12.1	F14D12.4	T21C9.8	Y46B2A.1	NA	NA	NA	NA	NA	NA	NA	Y45G12C.15	R107.7	NA	F59E12.1	NA	NA	NA	NA	NA	NA	NA	R07B1.11	NA	NA	NA	NA	NA
C06A5.5	R10D12.14	NA	NA	NA	NA	NA	NA	NA	F44B9.8	T03F6.5	ZC13.1	NA	NA	NA	NA	NA	NA	NA	NA	R08B4.1	K12C11.4	F14H12.2	F14D12.5	T21D12.14	Y46C8AL.11	NA	NA	NA	NA	NA	NA	NA	Y46H3A.5	R10D12.1	NA	F59E12.13	NA	NA	NA	NA	NA	NA	NA	R07B1.3	NA	NA	NA	NA	NA
C06A5.6	R10E11.4	NA	NA	NA	NA	NA	NA	NA	F44E2.10	T04A8.8	ZC142.1	NA	NA	NA	NA	NA	NA	NA	NA	R08C7.12	K12F2.2	F14H12.3	F14D2.7	T21H3.2	Y46D2A.1	NA	NA	NA	NA	NA	NA	NA	Y46H3D.7	R10D12.15	NA	F59E12.4	NA	NA	NA	NA	NA	NA	NA	R07B1.8	NA	NA	NA	NA	NA
C06A5.7	R119.1	NA	NA	NA	NA	NA	NA	NA	F44E2.2	T04C12.4	ZC155.1	NA	NA	NA	NA	NA	NA	NA	NA	R08C7.4	M01A12.1	F14H3.14	F14D7.10	T22B11.4	Y46D2A.2	NA	NA	NA	NA	NA	NA	NA	Y47G6A.30	R10E11.5	NA	F59E12.5	NA	NA	NA	NA	NA	NA	NA	R07B1.9	NA	NA	NA	NA	NA
C06A5.8	R119.2	NA	NA	NA	NA	NA	NA	NA	F44E2.7	T04C12.5	ZC204.10	NA	NA	NA	NA	NA	NA	NA	NA	R08C7.7	M01A12.3	F14H8.1	F14D7.11	T22B7.1	Y46D2A.5	NA	NA	NA	NA	NA	NA	NA	Y47H9A.1	R10H1.2	NA	F59E12.9	NA	NA	NA	NA	NA	NA	NA	R07B5.3	NA	NA	NA	NA	NA
C06A5.9	R119.7	NA	NA	NA	NA	NA	NA	NA	F44E2.8	T04C12.6	ZC204.11	NA	NA	NA	NA	NA	NA	NA	NA	R08E3.1	M01A8.2	F14H8.2	F14D7.12	T22D1.18	Y46E12A.4	NA	NA	NA	NA	NA	NA	NA	Y48A6A.1	R10H1.4	NA	F59G1.1	NA	NA	NA	NA	NA	NA	NA	R07B7.15	NA	NA	NA	NA	NA
C06A6.2	R11A8.2	NA	NA	NA	NA	NA	NA	NA	F44E7.4	T04C4.1	ZC204.3	NA	NA	NA	NA	NA	NA	NA	NA	R08E3.2	M01B2.8	F14H8.4	F14D7.6	T22E5.5	Y46G5A.24	NA	NA	NA	NA	NA	NA	NA	Y48A6B.10	R10H1.5	NA	F59G1.3	NA	NA	NA	NA	NA	NA	NA	R07D5.1	NA	NA	NA	NA	NA
C06A6.3	R11A8.5	NA	NA	NA	NA	NA	NA	NA	F44E7.5	T05B9.1	ZC204.7	NA	NA	NA	NA	NA	NA	NA	NA	R09A8.5	M01D7.5	F15A2.3	F14D7.7	T22F3.3	Y46G5A.7	NA	NA	NA	NA	NA	NA	NA	Y48A6B.13	R11.2	NA	F59G1.5	NA	NA	NA	NA	NA	NA	NA	R07E4.6	NA	NA	NA	NA	NA
C06A6.4	R11D1.1	NA	NA	NA	NA	NA	NA	NA	F44E7.9	T05C12.7	ZC204.9	NA	NA	NA	NA	NA	NA	NA	NA	R09B5.11	M01E10.2	F15A4.5	F14D7.8	T22F3.7	Y46H3C.5	NA	NA	NA	NA	NA	NA	NA	Y48A6B.6	R11D1.12	NA	F59G1.7	NA	NA	NA	NA	NA	NA	NA	R07E5.5	NA	NA	NA	NA	NA
C06A6.5	R11E3.8	NA	NA	NA	NA	NA	NA	NA	F44F4.2	T05E12.10	ZC239.20	NA	NA	NA	NA	NA	NA	NA	NA	R09B5.7	M01F1.5	F15A8.1	F14E5.5	T22H6.5	Y47D3A.1	NA	NA	NA	NA	NA	NA	NA	Y48B6A.12	R11D1.4	NA	F59H5.1	NA	NA	NA	NA	NA	NA	NA	R07G3.9	NA	NA	NA	NA	NA
C06A6.7	R12C12.2	NA	NA	NA	NA	NA	NA	NA	F44G4.4	T05E12.8	ZC239.21	NA	NA	NA	NA	NA	NA	NA	NA	R09D1.8	M01G12.9	F15A8.5	F14F11.1	T22H6.7	Y47D3A.12	NA	NA	NA	NA	NA	NA	NA	Y48E1B.10	R11E3.5	NA	F59H6.11	NA	NA	NA	NA	NA	NA	NA	R08D7.4	NA	NA	NA	NA	NA
C06A8.1	R12C12.7	NA	NA	NA	NA	NA	NA	NA	F45B8.1	T05E8.3	ZC434.8	NA	NA	NA	NA	NA	NA	NA	NA	R09E10.3	M01H9.2	F15B9.6	F14F11.2	T23B12.5	Y47D3A.13	NA	NA	NA	NA	NA	NA	NA	Y48G1BM.6	R11G1.3	NA	H04D03.2	NA	NA	NA	NA	NA	NA	NA	R08E3.4	NA	NA	NA	NA	NA
C06A8.2	R12E2.10	NA	NA	NA	NA	NA	NA	NA	F45B8.2	T05F1.2	ZC504.3	NA	NA	NA	NA	NA	NA	NA	NA	R09E10.5	M02B7.3	F15D4.3	F14F4.1	T23D5.7	Y47D3A.31	NA	NA	NA	NA	NA	NA	NA	Y48G8AL.13	R11G10.1	NA	H04D03.6	NA	NA	NA	NA	NA	NA	NA	R08E5.1	NA	NA	NA	NA	NA
C06A8.3	R12E2.11	NA	NA	NA	NA	NA	NA	NA	F45C12.12	T05F1.4	ZC518.3	NA	NA	NA	NA	NA	NA	NA	NA	R09G11.2	M02F4.3	F15D4.8	F14F7.3	T23E7.2	Y47D3A.32	NA	NA	NA	NA	NA	NA	NA	Y49C4A.5	R11G10.3	NA	H04M03.3	NA	NA	NA	NA	NA	NA	NA	R08E5.3	NA	NA	NA	NA	NA
C06A8.4	R12E2.2	NA	NA	NA	NA	NA	NA	NA	F45C12.15	T05F1.6	ZC53.7	NA	NA	NA	NA	NA	NA	NA	NA	R09H10.2	M02G9.1	F15E6.3	F14F8.13	T23F2.2	Y47D3B.11	NA	NA	NA	NA	NA	NA	NA	Y4C6B.2	R11G11.6	NA	H06H21.11	NA	NA	NA	NA	NA	NA	NA	R08F11.3	NA	NA	NA	NA	NA
C06A8.5	R12E2.3	NA	NA	NA	NA	NA	NA	NA	F45C12.2	T05G5.3	ZK1010.3	NA	NA	NA	NA	NA	NA	NA	NA	R09H10.5	M02G9.2	F15E6.5	F14F8.8	T23F4.1	Y47D7A.8	NA	NA	NA	NA	NA	NA	NA	Y51H4A.25	R11G11.7	NA	H06H21.3	NA	NA	NA	NA	NA	NA	NA	R09B5.13	NA	NA	NA	NA	NA
C06A8.6	R13A5.1	NA	NA	NA	NA	NA	NA	NA	F45D11.9	T05G5.5	ZK1098.1	NA	NA	NA	NA	NA	NA	NA	NA	R102.4	M03B6.2	F15E6.7	F14F9.4	T23F4.2	Y47G6A.7	NA	NA	NA	NA	NA	NA	NA	Y53C12B.2	R11G11.9	NA	H06H21.6	NA	NA	NA	NA	NA	NA	NA	R09D1.11	NA	NA	NA	NA	NA
C06A8.8	R13A5.7	NA	NA	NA	NA	NA	NA	NA	F45D3.5	T05H10.6	ZK1251.7	NA	NA	NA	NA	NA	NA	NA	NA	R105.1	M03B6.3	F15E6.9	F14F9.8	T24A6.16	Y47H10A.1	NA	NA	NA	NA	NA	NA	NA	Y53G8AM.7	R11H6.3	NA	H14A12.3	NA	NA	NA	NA	NA	NA	NA	R09G11.2	NA	NA	NA	NA	NA
C06A8.9	R13F6.10	NA	NA	NA	NA	NA	NA	NA	F45E12.1	T05H4.12	ZK1307.9	NA	NA	NA	NA	NA	NA	NA	NA	R106.2	M03D4.6	F15G9.6	F14H12.1	T24A6.4	Y47H10A.2	NA	NA	NA	NA	NA	NA	NA	Y53H1B.2	R12C12.3	NA	H14E04.2	NA	NA	NA	NA	NA	NA	NA	R10D12.7	NA	NA	NA	NA	NA
C06B3.16	R144.4	NA	NA	NA	NA	NA	NA	NA	F45E12.2	T05H4.14	ZK1320.10	NA	NA	NA	NA	NA	NA	NA	NA	R10D12.15	M03E7.4	F15H10.1	F14H12.2	T24B8.4	Y47H9B.2	NA	NA	NA	NA	NA	NA	NA	Y54E10BR.4	R12C12.9	NA	H17B01.4	NA	NA	NA	NA	NA	NA	NA	R10E11.2	NA	NA	NA	NA	NA
C06B3.3	R148.2	NA	NA	NA	NA	NA	NA	NA	F45F2.10	T05H4.5	ZK154.5	NA	NA	NA	NA	NA	NA	NA	NA	R10D12.17	M03F4.3	F15H10.2	F14H12.3	T24C2.1	Y48A6B.9	NA	NA	NA	NA	NA	NA	NA	Y54E2A.10	R13.2	NA	H20J04.2	NA	NA	NA	NA	NA	NA	NA	R10E11.8	NA	NA	NA	NA	NA
C06B3.4	R148.4	NA	NA	NA	NA	NA	NA	NA	F45F2.11	T06D4.1	ZK177.1	NA	NA	NA	NA	NA	NA	NA	NA	R10E8.3	M03F8.1	F15H10.7	F14H8.1	T24E12.6	Y48A6C.5	NA	NA	NA	NA	NA	NA	NA	Y54E2A.11	R13A5.10	NA	H21P03.1	NA	NA	NA	NA	NA	NA	NA	R10E11.9	NA	NA	NA	NA	NA
C06B3.6	R166.1	NA	NA	NA	NA	NA	NA	NA	F45G2.3	T06D8.5	ZK185.1	NA	NA	NA	NA	NA	NA	NA	NA	R11F4.2	M03F8.7	F15H10.8	F14H8.2	T24E12.9	Y48A6C.6	NA	NA	NA	NA	NA	NA	NA	Y54E5B.2	R13A5.15	NA	H21P03.2	NA	NA	NA	NA	NA	NA	NA	R10E8.3	NA	NA	NA	NA	NA
C06B3.7	R31.2	NA	NA	NA	NA	NA	NA	NA	F45G2.8	T06D8.7	ZK185.2	NA	NA	NA	NA	NA	NA	NA	NA	R11F4.3	M04C3.1	F16B12.8	F15A2.3	T24F1.4	Y48B6A.1	NA	NA	NA	NA	NA	NA	NA	Y54F10BM.7	R13A5.3	NA	H25P19.1	NA	NA	NA	NA	NA	NA	NA	R10F2.4	NA	NA	NA	NA	NA
C06B3.8	R53.1	NA	NA	NA	NA	NA	NA	NA	F45H11.3	T06D8.8	ZK20.5	NA	NA	NA	NA	NA	NA	NA	NA	R11G1.6	M04C3.2	F16B3.2	F15A2.5	T24H10.7	Y48E1B.11	NA	NA	NA	NA	NA	NA	NA	Y54G11A.6	R13A5.6	NA	H26D21.1	NA	NA	NA	NA	NA	NA	NA	R10F2.5	NA	NA	NA	NA	NA
C06B8.1	R53.7	NA	NA	NA	NA	NA	NA	NA	F46A9.4	T06E6.2	ZK250.6	NA	NA	NA	NA	NA	NA	NA	NA	R11H6.1	M04C3.3	F16B3.3	F15A4.6	T24H7.5	Y48G1C.6	NA	NA	NA	NA	NA	NA	NA	Y54G2A.10	R13D11.10	NA	H26D21.2	NA	NA	NA	NA	NA	NA	NA	R10H10.5	NA	NA	NA	NA	NA
C06B8.2	R74.8	NA	NA	NA	NA	NA	NA	NA	F46B6.3	T06G6.9	ZK287.5	NA	NA	NA	NA	NA	NA	NA	NA	R12C12.3	M04G12.3	F16B4.12	F15A8.1	T25B6.7	Y48G8AL.13	NA	NA	NA	NA	NA	NA	NA	Y54G2A.16	R13D11.3	NA	H27A22.1	NA	NA	NA	NA	NA	NA	NA	R11A5.2	NA	NA	NA	NA	NA
C06B8.7	T01B11.3	NA	NA	NA	NA	NA	NA	NA	F46B6.4	T07A9.5	ZK418.9	NA	NA	NA	NA	NA	NA	NA	NA	R12H7.1	M05B5.3	F16B4.4	F15A8.5	T25C12.1	Y49A10A.2	NA	NA	NA	NA	NA	NA	NA	Y54G2A.29	R13D11.4	NA	H27M09.1	NA	NA	NA	NA	NA	NA	NA	R11G1.1	NA	NA	NA	NA	NA
C06B8.8	T01B7.3	NA	NA	NA	NA	NA	NA	NA	F46B6.5	T07C4.3	ZK430.5	NA	NA	NA	NA	NA	NA	NA	NA	R13A5.8	M05B5.6	F16C3.1	F15A8.6	T25C12.2	Y49C4A.8	NA	NA	NA	NA	NA	NA	NA	Y54G2A.41	R13D7.11	NA	H27M09.2	NA	NA	NA	NA	NA	NA	NA	R11G1.6	NA	NA	NA	NA	NA
C06B8.9	T01C3.10	NA	NA	NA	NA	NA	NA	NA	F46C3.7	T07C4.7	ZK507.1	NA	NA	NA	NA	NA	NA	NA	NA	R13H4.7	M117.1	F16C3.3	F15B9.11	T25C12.3	Y49F6B.3	NA	NA	NA	NA	NA	NA	NA	Y54G2A.44	R13D7.7	NA	H28O16.2	NA	NA	NA	NA	NA	NA	NA	R11G10.2	NA	NA	NA	NA	NA
C06C3.1	T01C3.3	NA	NA	NA	NA	NA	NA	NA	F46C5.9	T07D3.9	ZK546.11	NA	NA	NA	NA	NA	NA	NA	NA	R13H7.2	M142.2	F16D3.1	F15B9.5	T25C8.2	Y49F6C.2	NA	NA	NA	NA	NA	NA	NA	Y54H5A.2	R13F6.3	NA	H31G24.4	NA	NA	NA	NA	NA	NA	NA	R12A1.3	NA	NA	NA	NA	NA
C06C3.10	T01C3.9	NA	NA	NA	NA	NA	NA	NA	F46F11.10	T07F12.2	ZK6.3	NA	NA	NA	NA	NA	NA	NA	NA	R151.4	M163.2	F16F9.3	F15B9.6	T26C12.4	Y49F6C.3	NA	NA	NA	NA	NA	NA	NA	Y55F3AM.7	R13H4.2	NA	H38K22.3	NA	NA	NA	NA	NA	NA	NA	R12B2.8	NA	NA	NA	NA	NA
C06C3.12	T01G5.7	NA	NA	NA	NA	NA	NA	NA	F46F11.2	T07F8.3	ZK6.4	NA	NA	NA	NA	NA	NA	NA	NA	R151.5	M195.3	F16F9.4	F15D4.3	T26G10.5	Y50D4B.2	NA	NA	NA	NA	NA	NA	NA	Y55F3BR.10	R160.7	NA	H43I07.1	NA	NA	NA	NA	NA	NA	NA	R12C12.4	NA	NA	NA	NA	NA
C06C3.3	T01H3.1	NA	NA	NA	NA	NA	NA	NA	F46F11.6	T07G12.10	ZK632.1	NA	NA	NA	NA	NA	NA	NA	NA	R173.1	M28.10	F16F9.5	F15D4.8	T26H10.1	Y51B9A.4	NA	NA	NA	NA	NA	NA	NA	Y56A3A.32	R173.4	NA	JC8.13	NA	NA	NA	NA	NA	NA	NA	R12E2.7	NA	NA	NA	NA	NA
C06C3.4	T01H3.4	NA	NA	NA	NA	NA	NA	NA	F46F11.8	T08A9.5	ZK632.10	NA	NA	NA	NA	NA	NA	NA	NA	R186.5	M6.1	F16G10.3	F15E6.10	T26H5.3	Y51H7BR.1	NA	NA	NA	NA	NA	NA	NA	Y56A3A.33	R186.1	NA	JC8.5	NA	NA	NA	NA	NA	NA	NA	R12H7.1	NA	NA	NA	NA	NA
C06C3.7	T01H8.1	NA	NA	NA	NA	NA	NA	NA	F46F3.4	T08A9.6	ZK632.13	NA	NA	NA	NA	NA	NA	NA	NA	R53.3	M60.6	F16G10.9	F15E6.2	T26H5.9	Y53C10A.10	NA	NA	NA	NA	NA	NA	NA	Y57A10A.14	R186.5	NA	JC8.6	NA	NA	NA	NA	NA	NA	NA	R12H7.4	NA	NA	NA	NA	NA
C06C3.8	T02E1.2	NA	NA	NA	NA	NA	NA	NA	F47A4.5	T08B2.11	ZK632.2	NA	NA	NA	NA	NA	NA	NA	NA	R57.1	M60.7	F16H6.10	F15E6.4	T26H8.5	Y53C10A.5	NA	NA	NA	NA	NA	NA	NA	Y57A10A.3	R31.2	NA	K01C8.5	NA	NA	NA	NA	NA	NA	NA	R13A1.4	NA	NA	NA	NA	NA
C06C3.9	T02E1.3	NA	NA	NA	NA	NA	NA	NA	F47D12.9	T08B2.7	ZK637.10	NA	NA	NA	NA	NA	NA	NA	NA	R57.2	M88.4	F16H9.1	F15E6.5	T27A1.5	Y53C12B.2	NA	NA	NA	NA	NA	NA	NA	Y57A10A.4	R53.5	NA	K01G12.3	NA	NA	NA	NA	NA	NA	NA	R13A5.9	NA	NA	NA	NA	NA
C06C6.4	T02G5.11	NA	NA	NA	NA	NA	NA	NA	F47D2.1	T08B6.1	ZK637.11	NA	NA	NA	NA	NA	NA	NA	NA	R90.1	R01B10.3	F17B5.2	F15E6.7	T27A3.1	Y53F4B.12	NA	NA	NA	NA	NA	NA	NA	Y57A10C.9	R90.2	NA	K01G5.4	NA	NA	NA	NA	NA	NA	NA	R13H4.7	NA	NA	NA	NA	NA
C06C6.5	T02G5.13	NA	NA	NA	NA	NA	NA	NA	F47G9.1	T08B6.5	ZK637.12	NA	NA	NA	NA	NA	NA	NA	NA	T01B4.2	R01E6.1	F17B5.8	F15E6.9	T27C4.1	Y53F4B.43	NA	NA	NA	NA	NA	NA	NA	Y57G11C.40	R90.4	NA	K01G5.9	NA	NA	NA	NA	NA	NA	NA	R13H4.8	NA	NA	NA	NA	NA
C06C6.7	T02G5.8	NA	NA	NA	NA	NA	NA	NA	F48A11.4	T08G3.10	ZK637.15	NA	NA	NA	NA	NA	NA	NA	NA	T01B6.4	R01E6.2	F17C11.11	F15G9.6	T27D12.2	Y53F4B.7	NA	NA	NA	NA	NA	NA	NA	Y57G11C.45	R90.5	NA	K02B12.5	NA	NA	NA	NA	NA	NA	NA	R151.1	NA	NA	NA	NA	NA
C06C6.8	T02G5.9	NA	NA	NA	NA	NA	NA	NA	F48C1.2	T08G3.8	ZK637.4	NA	NA	NA	NA	NA	NA	NA	NA	T01B7.7	R01E6.4	F17C11.2	F15H10.1	T27E7.5	Y53G8AM.8	NA	NA	NA	NA	NA	NA	NA	Y57G11C.46	T01A4.1	NA	K02B12.8	NA	NA	NA	NA	NA	NA	NA	R151.4	NA	NA	NA	NA	NA
C06C6.9	T03D8.1	NA	NA	NA	NA	NA	NA	NA	F48C1.5	T08G5.5	ZK662.4	NA	NA	NA	NA	NA	NA	NA	NA	T01C1.2	R01H10.4	F17C8.2	F15H10.2	T27E9.9	Y53G8B.1	NA	NA	NA	NA	NA	NA	NA	Y59A8B.11	T01B10.1	NA	K02B9.1	NA	NA	NA	NA	NA	NA	NA	R173.3	NA	NA	NA	NA	NA
C06E1.1	T03F1.1	NA	NA	NA	NA	NA	NA	NA	F48C1.6	T09A5.11	ZK662.5	NA	NA	NA	NA	NA	NA	NA	NA	T01C1.4	R02D1.1	F17C8.3	F15H10.8	T27F2.2	Y54E5B.2	NA	NA	NA	NA	NA	NA	NA	Y59E9AR.4	T01B4.2	NA	K02B9.2	NA	NA	NA	NA	NA	NA	NA	R74.2	NA	NA	NA	NA	NA
C06E1.10	T03F1.3	NA	NA	NA	NA	NA	NA	NA	F48E8.2	T09A5.8	ZK673.10	NA	NA	NA	NA	NA	NA	NA	NA	T01C4.6	R02D5.6	F17E9.8	F16B12.8	T28C12.2	Y54F10BM.9	NA	NA	NA	NA	NA	NA	NA	Y59H11AR.2	T01C2.1	NA	K02C4.3	NA	NA	NA	NA	NA	NA	NA	T01B7.9	NA	NA	NA	NA	NA
C06E1.3	T03F1.7	NA	NA	NA	NA	NA	NA	NA	F48E8.3	T09B4.1	ZK673.5	NA	NA	NA	NA	NA	NA	NA	NA	T01D3.1	R02E12.4	F17H10.2	F16B3.2	T28D9.7	Y54G2A.21	NA	NA	NA	NA	NA	NA	NA	Y61A9LA.12	T01C3.11	NA	K02F2.1	NA	NA	NA	NA	NA	NA	NA	T01C3.6	NA	NA	NA	NA	NA
C06E1.4	T03F6.2	NA	NA	NA	NA	NA	NA	NA	F48E8.6	T09E8.2	ZK673.6	NA	NA	NA	NA	NA	NA	NA	NA	T01D3.6	R02E12.8	F18A11.5	F16B3.3	T28D9.9	Y55B1BR.3	NA	NA	NA	NA	NA	NA	NA	Y61B8B.1	T01C8.2	NA	K02F3.10	NA	NA	NA	NA	NA	NA	NA	T01C4.2	NA	NA	NA	NA	NA
C06E1.5	T03G11.6	NA	NA	NA	NA	NA	NA	NA	F48E8.7	T09F3.3	ZK688.7	NA	NA	NA	NA	NA	NA	NA	NA	T01D3.7	R02F11.1	F18A12.8	F16B4.12	T28F2.3	Y55F3C.2	NA	NA	NA	NA	NA	NA	NA	Y62E10A.6	T01D1.4	NA	K02F3.11	NA	NA	NA	NA	NA	NA	NA	T01D1.3	NA	NA	NA	NA	NA
C06E1.6	T04A11.6	NA	NA	NA	NA	NA	NA	NA	F48F5.5	T09F5.12	ZK721.3	NA	NA	NA	NA	NA	NA	NA	NA	T01E8.7	R02F11.2	F18C5.9	F16B4.4	T28F2.5	Y55F3C.9	NA	NA	NA	NA	NA	NA	NA	Y64G10A.6	T01G1.2	NA	K02F6.7	NA	NA	NA	NA	NA	NA	NA	T01D1.7	NA	NA	NA	NA	NA
C06E1.7	T04A8.15	NA	NA	NA	NA	NA	NA	NA	F49C12.15	T10B11.2	ZK742.1	NA	NA	NA	NA	NA	NA	NA	NA	T01E8.8	R02F11.3	F18E2.5	F16C3.1	T28H10.2	Y55H10A.2	NA	NA	NA	NA	NA	NA	NA	Y65B4BR.5	T01G5.1	NA	K03B4.1	NA	NA	NA	NA	NA	NA	NA	T01D3.1	NA	NA	NA	NA	NA
C06E1.8	T04A8.9	NA	NA	NA	NA	NA	NA	NA	F49C12.8	T10B11.3	ZK742.6	NA	NA	NA	NA	NA	NA	NA	NA	T01E8.9	R03C1.1	F18E2.6	F16F9.3	VC5.1	Y56A3A.15	NA	NA	NA	NA	NA	NA	NA	Y66H1B.2	T01G6.2	NA	K03B4.2	NA	NA	NA	NA	NA	NA	NA	T01H3.1	NA	NA	NA	NA	NA
C06E1.9	T04D1.3	NA	NA	NA	NA	NA	NA	NA	F49E8.2	T10B11.8	ZK856.16	NA	NA	NA	NA	NA	NA	NA	NA	T01G5.1	R03E9.4	F18E3.5	F16F9.4	VC5.3	Y57A10C.6	NA	NA	NA	NA	NA	NA	NA	Y67D8A.3	T01G6.8	NA	K03B4.3	NA	NA	NA	NA	NA	NA	NA	T02C5.5	NA	NA	NA	NA	NA
C06E2.1	T04D3.8	NA	NA	NA	NA	NA	NA	NA	F49E8.3	T10D4.3	ZK856.5	NA	NA	NA	NA	NA	NA	NA	NA	T01H3.1	R03H4.6	F18E3.6	F16F9.5	VM106R.1	Y58G8A.4	NA	NA	NA	NA	NA	NA	NA	Y67D8B.2	T02E1.5	NA	K03B4.7	NA	NA	NA	NA	NA	NA	NA	T02E1.8	NA	NA	NA	NA	NA
C06E2.3	T04F8.1	NA	NA	NA	NA	NA	NA	NA	F49E8.4	T10E9.7	ZK858.3	NA	NA	NA	NA	NA	NA	NA	NA	T02B11.6	R04A9.1	F18E9.2	F16H11.1	VW02B12L.1	Y59A8B.10	NA	NA	NA	NA	NA	NA	NA	Y67H2A.4	T03D3.14	NA	K03D10.3	NA	NA	NA	NA	NA	NA	NA	T02E9.2	NA	NA	NA	NA	NA
C06E2.5	T04H1.2	NA	NA	NA	NA	NA	NA	NA	F49E8.7	T10F2.1	ZK892.7	NA	NA	NA	NA	NA	NA	NA	NA	T02C12.1	R04B3.1	F18E9.3	F16H11.5	W01A8.1	Y59C2A.3	NA	NA	NA	NA	NA	NA	NA	Y67H2A.7	T03E6.9	NA	K03H1.13	NA	NA	NA	NA	NA	NA	NA	T02G6.1	NA	NA	NA	NA	NA
C06E2.7	T05A12.2	NA	NA	NA	NA	NA	NA	NA	F49H12.6	T10F2.4	ZK899.5	NA	NA	NA	NA	NA	NA	NA	NA	T02C5.1	R04B3.3	F18E9.4	F16H6.1	W01B11.5	Y61A9LA.3	NA	NA	NA	NA	NA	NA	NA	Y67H2A.8	T03F6.4	NA	K03H1.2	NA	NA	NA	NA	NA	NA	NA	T03D8.5	NA	NA	NA	NA	NA
C06E2.8	T05A6.2	NA	NA	NA	NA	NA	NA	NA	F52A8.6	T10H9.4	ZK899.6	NA	NA	NA	NA	NA	NA	NA	NA	T02D1.6	R04B5.8	F18F11.5	F16H6.10	W02B3.2	Y62H9A.15	NA	NA	NA	NA	NA	NA	NA	Y69H2.1	T03F7.7	NA	K03H4.2	NA	NA	NA	NA	NA	NA	NA	T03F1.11	NA	NA	NA	NA	NA
C06E2.9	T05A7.1	NA	NA	NA	NA	NA	NA	NA	F52B11.1	T11A5.5	ZK930.2	NA	NA	NA	NA	NA	NA	NA	NA	T02E9.2	R04D3.6	F18G5.1	F16H9.1	W02B3.3	Y63D3A.10	NA	NA	NA	NA	NA	NA	NA	Y6G8.2	T03G11.10	NA	K04C2.3	NA	NA	NA	NA	NA	NA	NA	T03F1.7	NA	NA	NA	NA	NA
C06E4.2	T05A8.8	NA	NA	NA	NA	NA	NA	NA	F52B5.2	T11F8.1	ZK938.2	NA	NA	NA	NA	NA	NA	NA	NA	T02G6.2	R04E5.10	F18G5.2	F17B5.8	W02D3.6	Y63D3A.2	NA	NA	NA	NA	NA	NA	NA	Y6G8.9	T03G6.3	NA	K04D7.2	NA	NA	NA	NA	NA	NA	NA	T03F7.1	NA	NA	NA	NA	NA
C06E4.3	T05B11.3	NA	NA	NA	NA	NA	NA	NA	F52B5.3	T11G6.1	NA	NA	NA	NA	NA	NA	NA	NA	NA	T03D8.3	R04F11.4	F18G5.3	F17C11.11	W02D9.10	Y63D3A.9	NA	NA	NA	NA	NA	NA	NA	Y71A12B.8	T04A11.2	NA	K04D7.5	NA	NA	NA	NA	NA	NA	NA	T03G11.9	NA	NA	NA	NA	NA
C06E4.7	T05B9.1	NA	NA	NA	NA	NA	NA	NA	F52C12.1	T11G6.8	NA	NA	NA	NA	NA	NA	NA	NA	NA	T03D8.4	R05G6.1	F18G5.4	F17C11.2	W02G9.4	Y66D12A.12	NA	NA	NA	NA	NA	NA	NA	Y71G10AR.1	T04A11.5	NA	K04F10.3	NA	NA	NA	NA	NA	NA	NA	T04C10.4	NA	NA	NA	NA	NA
C06E4.8	T05E7.3	NA	NA	NA	NA	NA	NA	NA	F52C12.2	T12A2.3	NA	NA	NA	NA	NA	NA	NA	NA	NA	T03D8.5	R05G6.12	F19B10.13	F17C11.6	W03D8.6	Y67H2A.1	NA	NA	NA	NA	NA	NA	NA	Y71G10AR.4	T04A8.18	NA	K04F10.6	NA	NA	NA	NA	NA	NA	NA	T04C12.1	NA	NA	NA	NA	NA
C06E7.1	T05G11.1	NA	NA	NA	NA	NA	NA	NA	F52C12.3	T12A2.6	NA	NA	NA	NA	NA	NA	NA	NA	NA	T03D8.6	R05G6.6	F19B2.5	F17C8.2	W03F8.6	Y69A2AR.29	NA	NA	NA	NA	NA	NA	NA	Y71H2AM.1	T04B2.6	NA	K04F10.7	NA	NA	NA	NA	NA	NA	NA	T04C12.9	NA	NA	NA	NA	NA
C06E7.2	T05G5.7	NA	NA	NA	NA	NA	NA	NA	F52C6.11	T12E12.2	NA	NA	NA	NA	NA	NA	NA	NA	NA	T03F7.1	R05G9R.1	F19C6.3	F17C8.3	W03G1.1	Y69F12A.2	NA	NA	NA	NA	NA	NA	NA	Y71H2B.11	T04C12.7	NA	K04G2.6	NA	NA	NA	NA	NA	NA	NA	T04C9.4	NA	NA	NA	NA	NA
C06E7.3	T05G5.9	NA	NA	NA	NA	NA	NA	NA	F52C6.2	T12E12.4	NA	NA	NA	NA	NA	NA	NA	NA	NA	T03G11.3	R05H5.2	F19C7.1	F17E9.8	W03G11.2	Y6D1A.1	NA	NA	NA	NA	NA	NA	NA	Y73B6A.4	T04D3.3	NA	K04G7.1	NA	NA	NA	NA	NA	NA	NA	T04F3.4	NA	NA	NA	NA	NA
C06E7.4	T05H10.1	NA	NA	NA	NA	NA	NA	NA	F52C6.3	T12F5.2	NA	NA	NA	NA	NA	NA	NA	NA	NA	T03G6.1	R06C1.6	F19C7.4	F17H10.2	W04G3.13	Y71A12B.8	NA	NA	NA	NA	NA	NA	NA	Y73B6BL.18	T04F8.7	NA	K05C4.1	NA	NA	NA	NA	NA	NA	NA	T04H1.6	NA	NA	NA	NA	NA
C06E7.6	T05H10.6	NA	NA	NA	NA	NA	NA	NA	F52C6.8	T12F5.3	NA	NA	NA	NA	NA	NA	NA	NA	NA	T03G6.2	R06C7.10	F19D8.1	F18A12.8	W04G5.2	Y71F9AL.7	NA	NA	NA	NA	NA	NA	NA	Y73B6BL.26	T04H1.2	NA	K05C4.6	NA	NA	NA	NA	NA	NA	NA	T04H1.8	NA	NA	NA	NA	NA
C06E7.88	T05H10.7	NA	NA	NA	NA	NA	NA	NA	F52C9.7	T13H5.7	NA	NA	NA	NA	NA	NA	NA	NA	NA	T03G6.3	R06C7.3	F19F10.3	F18C5.5	W04G5.4	Y71F9B.8	NA	NA	NA	NA	NA	NA	NA	Y73B6BL.6	T04H1.3	NA	K06A5.7	NA	NA	NA	NA	NA	NA	NA	T05A1.3	NA	NA	NA	NA	NA
C06E8.3	T05H4.1	NA	NA	NA	NA	NA	NA	NA	F52D2.2	T14G10.3	NA	NA	NA	NA	NA	NA	NA	NA	NA	T04A8.18	R07A4.4	F19F10.4	F18E2.5	W04G5.7	Y71G10AL.1	NA	NA	NA	NA	NA	NA	NA	Y73B6BL.7	T04H1.7	NA	K06H7.4	NA	NA	NA	NA	NA	NA	NA	T05A8.4	NA	NA	NA	NA	NA
C06E8.5	T05H4.5	NA	NA	NA	NA	NA	NA	NA	F52D2.4	T14G10.6	NA	NA	NA	NA	NA	NA	NA	NA	NA	T04F8.6	R07B1.13	F19H8.2	F18E2.6	W05B2.6	Y71G12A.3	NA	NA	NA	NA	NA	NA	NA	Y73F8A.21	T05A1.1	NA	K06H7.6	NA	NA	NA	NA	NA	NA	NA	T05B4.11	NA	NA	NA	NA	NA
C06G1.1	T06C12.2	NA	NA	NA	NA	NA	NA	NA	F52D2.6	T14G10.8	NA	NA	NA	NA	NA	NA	NA	NA	NA	T05A8.3	R07B1.5	F20A1.1	F18E3.12	W05B5.1	Y71G12B.20	NA	NA	NA	NA	NA	NA	NA	Y75B8A.35	T05A7.1	NA	K06H7.9	NA	NA	NA	NA	NA	NA	NA	T05B4.4	NA	NA	NA	NA	NA
C06G1.2	T06D4.1	NA	NA	NA	NA	NA	NA	NA	F52E1.1	T15H9.4	NA	NA	NA	NA	NA	NA	NA	NA	NA	T05A8.4	R07B1.8	F20A1.4	F18E3.13	W05B5.2	Y71H2AM.13	NA	NA	NA	NA	NA	NA	NA	Y79H2A.1	T05A7.7	NA	K07A1.1	NA	NA	NA	NA	NA	NA	NA	T05B4.8	NA	NA	NA	NA	NA
C06G1.4	T06D8.5	NA	NA	NA	NA	NA	NA	NA	F52E1.10	T15H9.5	NA	NA	NA	NA	NA	NA	NA	NA	NA	T05A8.5	R07B5.4	F20B10.3	F18E3.6	W05F2.4	Y73B6BL.21	NA	NA	NA	NA	NA	NA	NA	Y82E9BR.21	T05A8.6	NA	K07A1.17	NA	NA	NA	NA	NA	NA	NA	T05B4.9	NA	NA	NA	NA	NA
C06G1.5	T06D8.6	NA	NA	NA	NA	NA	NA	NA	F52E1.13	T16G1.11	NA	NA	NA	NA	NA	NA	NA	NA	NA	T05B4.4	R07D5.1	F20B6.4	F18E9.2	W05G11.6	Y73B6BL.24	NA	NA	NA	NA	NA	NA	NA	Y82E9BR.25	T05B4.12	NA	K07A1.2	NA	NA	NA	NA	NA	NA	NA	T05C3.2	NA	NA	NA	NA	NA
C06G1.6	T06D8.9	NA	NA	NA	NA	NA	NA	NA	F52F12.3	T16G12.9	NA	NA	NA	NA	NA	NA	NA	NA	NA	T05B4.8	R07E3.2	F20C5.4	F18E9.3	W05H12.1	Y73B6BL.269	NA	NA	NA	NA	NA	NA	NA	Y82E9BR.5	T05C1.1	NA	K07A1.8	NA	NA	NA	NA	NA	NA	NA	T05C3.4	NA	NA	NA	NA	NA
C06G3.1	T07A5.6	NA	NA	NA	NA	NA	NA	NA	F52F12.4	T16H12.11	NA	NA	NA	NA	NA	NA	NA	NA	NA	T05C1.1	R07E3.6	F20D1.3	F18E9.4	W06D12.2	Y73B6BL.36	NA	NA	NA	NA	NA	NA	NA	Y94A7B.4	T05C12.11	NA	K07A12.2	NA	NA	NA	NA	NA	NA	NA	T05D4.3	NA	NA	NA	NA	NA
C06G3.10	T07A9.6	NA	NA	NA	NA	NA	NA	NA	F52G2.1	T16H12.4	NA	NA	NA	NA	NA	NA	NA	NA	NA	T05C12.10	R07E4.1	F20D6.3	F18F11.5	W06D12.5	Y73B6BL.9	NA	NA	NA	NA	NA	NA	NA	Y94A7B.5	T05D4.1	NA	K07A12.3	NA	NA	NA	NA	NA	NA	NA	T05E11.2	NA	NA	NA	NA	NA
C06G3.11	T07C12.14	NA	NA	NA	NA	NA	NA	NA	F52G2.2	T17A3.9	NA	NA	NA	NA	NA	NA	NA	NA	NA	T05C12.4	R08A2.7	F20D6.5	F18G5.1	W06H8.6	Y73F8A.36	NA	NA	NA	NA	NA	NA	NA	Y94A7B.6	T05E7.4	NA	K07B1.3	NA	NA	NA	NA	NA	NA	NA	T05F1.9	NA	NA	NA	NA	NA
C06G3.2	T07C4.7	NA	NA	NA	NA	NA	NA	NA	F52H3.4	T17E9.1	NA	NA	NA	NA	NA	NA	NA	NA	NA	T05C3.2	R08B4.1	F20D6.8	F18G5.2	W07G1.3	Y74C9A.3	NA	NA	NA	NA	NA	NA	NA	Y94A7B.7	T05G5.11	NA	K07C11.2	NA	NA	NA	NA	NA	NA	NA	T05H10.3	NA	NA	NA	NA	NA
C06G3.3	T07E3.3	NA	NA	NA	NA	NA	NA	NA	F53A2.2	T19B10.8	NA	NA	NA	NA	NA	NA	NA	NA	NA	T05C3.4	R08C7.4	F20G2.5	F18G5.3	W07G1.5	Y75B7AL.1	NA	NA	NA	NA	NA	NA	NA	Y94H6A.1	T05H10.8	NA	K07C5.6	NA	NA	NA	NA	NA	NA	NA	T05H4.7	NA	NA	NA	NA	NA
C06G3.5	T07E3.5	NA	NA	NA	NA	NA	NA	NA	F53A2.4	T19C3.8	NA	NA	NA	NA	NA	NA	NA	NA	NA	T05C3.6	R08C7.5	F20G2.6	F18G5.6	W07G4.7	Y75B8A.19	NA	NA	NA	NA	NA	NA	NA	Y97E10B.10	T05H4.5	NA	K07D4.3	NA	NA	NA	NA	NA	NA	NA	T06A1.4	NA	NA	NA	NA	NA
C06G3.6	T07F8.3	NA	NA	NA	NA	NA	NA	NA	F53A2.5	T19C4.6	NA	NA	NA	NA	NA	NA	NA	NA	NA	T05F1.8	R08C7.7	F21A10.1	F19B10.13	W07G9.2	Y75B8A.2	NA	NA	NA	NA	NA	NA	NA	Y97E10B.3	T06D8.1	NA	K07E8.7	NA	NA	NA	NA	NA	NA	NA	T06A4.1	NA	NA	NA	NA	NA
C06G3.7	T07G12.11	NA	NA	NA	NA	NA	NA	NA	F53A2.7	T19H12.2	NA	NA	NA	NA	NA	NA	NA	NA	NA	T05H10.7	R08C7.8	F21A3.3	F19B2.5	W08D2.3	Y76B12C.8	NA	NA	NA	NA	NA	NA	NA	Y97E10B.4	T06E6.5	NA	K07G5.1	NA	NA	NA	NA	NA	NA	NA	T06A4.3	NA	NA	NA	NA	NA
C06G3.8	T07G12.12	NA	NA	NA	NA	NA	NA	NA	F53A2.8	T20B12.2	NA	NA	NA	NA	NA	NA	NA	NA	NA	T06A4.1	R08E3.1	F21A3.6	F19B2.7	W08D2.5	Y76G2A.1	NA	NA	NA	NA	NA	NA	NA	Y9C9A.4	T06F4.3	NA	K07G5.2	NA	NA	NA	NA	NA	NA	NA	T06D10.1	NA	NA	NA	NA	NA
C06G3.9	T07G12.6	NA	NA	NA	NA	NA	NA	NA	F53A3.2	T20D4.16	NA	NA	NA	NA	NA	NA	NA	NA	NA	T06C12.13	R08E3.2	F21A3.7	F19C6.3	W08E12.7	Y77E11A.10	NA	NA	NA	NA	NA	NA	NA	ZC196.9	T07C12.11	NA	K07H8.2	NA	NA	NA	NA	NA	NA	NA	T06D10.3	NA	NA	NA	NA	NA
C06G4.1	T08A11.1	NA	NA	NA	NA	NA	NA	NA	F53C11.4	T20D4.6	NA	NA	NA	NA	NA	NA	NA	NA	NA	T06C12.8	R09B5.11	F21A3.8	F19C7.1	W08F4.5	Y77E11A.8	NA	NA	NA	NA	NA	NA	NA	ZC21.2	T07C12.9	NA	K08A8.1	NA	NA	NA	NA	NA	NA	NA	T06D8.10	NA	NA	NA	NA	NA
C06G4.2	T08B2.9	NA	NA	NA	NA	NA	NA	NA	F53C11.5	T20F5.2	NA	NA	NA	NA	NA	NA	NA	NA	NA	T06F4.1	R09B5.12	F21C10.13	F19C7.4	W09D10.2	Y77E11A.9	NA	NA	NA	NA	NA	NA	NA	ZC239.13	T07D4.2	NA	K08B4.1	NA	NA	NA	NA	NA	NA	NA	T06D8.2	NA	NA	NA	NA	NA
C06G4.4	T08D2.6	NA	NA	NA	NA	NA	NA	NA	F53E4.1	T20F5.6	NA	NA	NA	NA	NA	NA	NA	NA	NA	T06F4.3	R09B5.3	F21D12.1	F19D8.1	W10C4.1	Y80D3A.3	NA	NA	NA	NA	NA	NA	NA	ZC239.16	T07F12.4	NA	K08D10.12	NA	NA	NA	NA	NA	NA	NA	T06D8.3	NA	NA	NA	NA	NA
C06G4.5	T08G11.1	NA	NA	NA	NA	NA	NA	NA	F53F1.2	T20G5.2	NA	NA	NA	NA	NA	NA	NA	NA	NA	T06G6.12	R09D1.8	F21D12.3	F19F10.3	W10C8.6	Y82E9BL.3	NA	NA	NA	NA	NA	NA	NA	ZC239.6	T07F8.2	NA	K08D10.2	NA	NA	NA	NA	NA	NA	NA	T06F4.1	NA	NA	NA	NA	NA
C06G4.6	T08G5.5	NA	NA	NA	NA	NA	NA	NA	F53F1.3	T20H4.4	NA	NA	NA	NA	NA	NA	NA	NA	NA	T06G6.6	R09H10.2	F21F3.1	F19F10.4	W10G11.17	Y82E9BR.17	NA	NA	NA	NA	NA	NA	NA	ZC266.2	T07G12.1	NA	K08D12.1	NA	NA	NA	NA	NA	NA	NA	T06G6.12	NA	NA	NA	NA	NA
C06G8.1	T09A12.4	NA	NA	NA	NA	NA	NA	NA	F53F10.3	T21C12.4	NA	NA	NA	NA	NA	NA	NA	NA	NA	T07C12.8	R09H10.5	F21F3.3	F19G12.8	Y102A11A.1	Y87G2A.17	NA	NA	NA	NA	NA	NA	NA	ZC317.3	T07G12.2	NA	K08D12.3	NA	NA	NA	NA	NA	NA	NA	T06G6.3	NA	NA	NA	NA	NA
C06G8.2	T09A5.12	NA	NA	NA	NA	NA	NA	NA	F53F10.8	T21C12.8	NA	NA	NA	NA	NA	NA	NA	NA	NA	T07C5.2	R102.1	F21F8.10	F19G12.9	Y102A11A.3	Y87G2A.2	NA	NA	NA	NA	NA	NA	NA	ZC373.4	T07H3.5	NA	K08D9.3	NA	NA	NA	NA	NA	NA	NA	T06H11.1	NA	NA	NA	NA	NA
C06G8.3	T09A5.8	NA	NA	NA	NA	NA	NA	NA	F53F4.12	T21C9.1	NA	NA	NA	NA	NA	NA	NA	NA	NA	T07D1.1	R105.1	F21F8.11	F20A1.1	Y102A5B.3	Y87G2A.3	NA	NA	NA	NA	NA	NA	NA	ZC374.1	T08A9.11	NA	K08E3.4	NA	NA	NA	NA	NA	NA	NA	T06H11.5	NA	NA	NA	NA	NA
C06H2.1	T09B4.10	NA	NA	NA	NA	NA	NA	NA	F53F4.3	T21C9.4	NA	NA	NA	NA	NA	NA	NA	NA	NA	T07D1.2	R106.2	F21F8.3	F20A1.10	Y102A5C.13	Y92H12BR.4	NA	NA	NA	NA	NA	NA	NA	ZC395.2	T08A9.2	NA	K08E3.7	NA	NA	NA	NA	NA	NA	NA	T07A9.3	NA	NA	NA	NA	NA
C06H2.2	T09B4.2	NA	NA	NA	NA	NA	NA	NA	F53F8.5	T21E12.4	NA	NA	NA	NA	NA	NA	NA	NA	NA	T07D1.5	R10D12.1	F21F8.4	F20A1.6	Y102A5C.25	Y92H12BR.8	NA	NA	NA	NA	NA	NA	NA	ZC395.5	T09A12.2	NA	K08E4.2	NA	NA	NA	NA	NA	NA	NA	T07D1.1	NA	NA	NA	NA	NA
C06H2.3	T09B4.9	NA	NA	NA	NA	NA	NA	NA	F53G12.5	T21E3.1	NA	NA	NA	NA	NA	NA	NA	NA	NA	T07D3.5	R10D12.15	F21F8.6	F20B10.3	Y104H12A.1	Y94H6A.5	NA	NA	NA	NA	NA	NA	NA	ZC395.6	T09B9.2	NA	K08E4.6	NA	NA	NA	NA	NA	NA	NA	T07D10.1	NA	NA	NA	NA	NA
C06H2.4	T09B9.1	NA	NA	NA	NA	NA	NA	NA	F53H1.3	T21G5.3	NA	NA	NA	NA	NA	NA	NA	NA	NA	T07D3.6	R10D12.17	F21F8.7	F20B4.6	Y105C5A.23	Y97E10AM.1	NA	NA	NA	NA	NA	NA	NA	ZC443.1	T09E8.4	NA	K08E7.3	NA	NA	NA	NA	NA	NA	NA	T07F10.4	NA	NA	NA	NA	NA
C06H2.5	T09B9.4	NA	NA	NA	NA	NA	NA	NA	F54A3.2	T22A3.3	NA	NA	NA	NA	NA	NA	NA	NA	NA	T07F10.4	R10E8.3	F21G4.3	F20B6.2	Y105E8A.1	ZC204.2	NA	NA	NA	NA	NA	NA	NA	ZC455.5	T09F5.2	NA	K08F11.5	NA	NA	NA	NA	NA	NA	NA	T07H6.4	NA	NA	NA	NA	NA
C06H2.6	T09F3.3	NA	NA	NA	NA	NA	NA	NA	F54A3.3	T22A3.5	NA	NA	NA	NA	NA	NA	NA	NA	NA	T07H6.1	R10E8.6	F21G4.4	F20B6.4	Y105E8A.12	ZC204.7	NA	NA	NA	NA	NA	NA	NA	ZC513.4	T09H2.1	NA	K08F4.2	NA	NA	NA	NA	NA	NA	NA	T07H6.5	NA	NA	NA	NA	NA
C06H2.7	T10B11.8	NA	NA	NA	NA	NA	NA	NA	F54C1.2	T22A3.6	NA	NA	NA	NA	NA	NA	NA	NA	NA	T07H6.4	R10E8.8	F21H12.7	F20C5.4	Y105E8B.1	ZC239.21	NA	NA	NA	NA	NA	NA	NA	ZC581.9	T10B10.5	NA	K08F9.2	NA	NA	NA	NA	NA	NA	NA	T07H8.4	NA	NA	NA	NA	NA
C06H5.1	T10B5.5	NA	NA	NA	NA	NA	NA	NA	F54C4.2	T22B2.1	NA	NA	NA	NA	NA	NA	NA	NA	NA	T07H6.5	R11A5.7	F21H7.10	F20D1.3	Y106G6G.2	ZC373.1	NA	NA	NA	NA	NA	NA	NA	ZK105.5	T10B11.1	NA	K08F9.4	NA	NA	NA	NA	NA	NA	NA	T08A9.3	NA	NA	NA	NA	NA
C06H5.2	T10C6.10	NA	NA	NA	NA	NA	NA	NA	F54C4.3	T22B2.2	NA	NA	NA	NA	NA	NA	NA	NA	NA	T08A9.11	R11F4.3	F22A3.1	F20D6.5	Y106G6G.4	ZC373.5	NA	NA	NA	NA	NA	NA	NA	ZK1058.1	T10B11.2	NA	K08H2.3	NA	NA	NA	NA	NA	NA	NA	T08B1.2	NA	NA	NA	NA	NA
C06H5.6	T10E9.1	NA	NA	NA	NA	NA	NA	NA	F54C8.4	T22C1.1	NA	NA	NA	NA	NA	NA	NA	NA	NA	T08B2.12	R11G1.1	F22A3.6	F20D6.8	Y106G6G.6	ZC376.1	NA	NA	NA	NA	NA	NA	NA	ZK1058.6	T10B9.2	NA	K09A9.4	NA	NA	NA	NA	NA	NA	NA	T08B2.3	NA	NA	NA	NA	NA
C06H5.7	T10F2.3	NA	NA	NA	NA	NA	NA	NA	F54C8.5	T22C1.4	NA	NA	NA	NA	NA	NA	NA	NA	NA	T08B2.2	R11G1.6	F22B5.3	F20G2.1	Y106G6H.1	ZC376.3	NA	NA	NA	NA	NA	NA	NA	ZK131.11	T10B9.3	NA	K09E3.7	NA	NA	NA	NA	NA	NA	NA	T08E11.4	NA	NA	NA	NA	NA
C06H5.8	T10H9.4	NA	NA	NA	NA	NA	NA	NA	F54C9.4	T22C1.5	NA	NA	NA	NA	NA	NA	NA	NA	NA	T08E11.2	R11G10.1	F22B7.7	F20G2.5	Y10G11A.1	ZC455.5	NA	NA	NA	NA	NA	NA	NA	ZK1320.10	T10B9.7	NA	K09E4.3	NA	NA	NA	NA	NA	NA	NA	T08G5.3	NA	NA	NA	NA	NA
C07A12.1	T11F8.3	NA	NA	NA	NA	NA	NA	NA	F54C9.6	T22D1.3	NA	NA	NA	NA	NA	NA	NA	NA	NA	T08E11.4	R11G10.2	F22D6.11	F20G2.6	Y110A2AL.8	ZC84.3	NA	NA	NA	NA	NA	NA	NA	ZK1321.2	T10B9.8	NA	K09H9.2	NA	NA	NA	NA	NA	NA	NA	T09B4.7	NA	NA	NA	NA	NA
C07A12.2	T11G6.5	NA	NA	NA	NA	NA	NA	NA	F54C9.8	T22D1.4	NA	NA	NA	NA	NA	NA	NA	NA	NA	T08G2.2	R11G11.12	F22E10.1	F21A10.1	Y113G7A.11	ZK1037.4	NA	NA	NA	NA	NA	NA	NA	ZK180.7	T10E10.7	NA	K10B2.4	NA	NA	NA	NA	NA	NA	NA	T09B9.5	NA	NA	NA	NA	NA
C07A12.3	T12A2.8	NA	NA	NA	NA	NA	NA	NA	F54D10.5	T22D1.5	NA	NA	NA	NA	NA	NA	NA	NA	NA	T08G5.3	R11H6.1	F22E10.3	F21A3.3	Y116A8B.5	ZK1053.4	NA	NA	NA	NA	NA	NA	NA	ZK185.5	T10E9.5	NA	K10B2.5	NA	NA	NA	NA	NA	NA	NA	T10A3.1	NA	NA	NA	NA	NA
C07A12.4	T12C9.7	NA	NA	NA	NA	NA	NA	NA	F54D10.7	T22D1.9	NA	NA	NA	NA	NA	NA	NA	NA	NA	T08H4.2	R12A1.3	F22E12.1	F21A3.6	Y116A8C.14	ZK1055.6	NA	NA	NA	NA	NA	NA	NA	ZK20.4	T10H10.2	NA	K10C3.2	NA	NA	NA	NA	NA	NA	NA	T10B5.10	NA	NA	NA	NA	NA
C07A12.5	T12D8.2	NA	NA	NA	NA	NA	NA	NA	F54D11.4	T22F3.2	NA	NA	NA	NA	NA	NA	NA	NA	NA	T09A5.2	R12E2.15	F22E12.3	F21A3.7	Y119C1B.4	ZK1058.6	NA	NA	NA	NA	NA	NA	NA	ZK20.6	T10H9.8	NA	K10C8.3	NA	NA	NA	NA	NA	NA	NA	T10B9.10	NA	NA	NA	NA	NA
C07A12.7	T12D8.3	NA	NA	NA	NA	NA	NA	NA	F54D12.4	T22F3.4	NA	NA	NA	NA	NA	NA	NA	NA	NA	T09B9.2	R12E2.6	F22E5.4	F21A3.8	Y119D3B.21	ZK1098.3	NA	NA	NA	NA	NA	NA	NA	ZK228.5	T11A5.3	NA	K10D2.1	NA	NA	NA	NA	NA	NA	NA	T10B9.9	NA	NA	NA	NA	NA
C07A4.1	T12D8.7	NA	NA	NA	NA	NA	NA	NA	F54D12.5	T22H9.2	NA	NA	NA	NA	NA	NA	NA	NA	NA	T09D3.3	R12H7.1	F22F1.3	F21C10.11	Y11D7A.14	ZK1193.5	NA	NA	NA	NA	NA	NA	NA	ZK262.6	T11F9.11	NA	K10D2.2	NA	NA	NA	NA	NA	NA	NA	T10G3.2	NA	NA	NA	NA	NA
C07A4.2	T12D8.8	NA	NA	NA	NA	NA	NA	NA	F54D12.6	T23B12.1	NA	NA	NA	NA	NA	NA	NA	NA	NA	T09E11.3	R13A1.4	F22F4.4	F21C10.13	Y16B4A.2	ZK1290.3	NA	NA	NA	NA	NA	NA	NA	ZK262.7	T11G6.3	NA	K10D2.3	NA	NA	NA	NA	NA	NA	NA	T11B7.4	NA	NA	NA	NA	NA
C07A4.3	T12F5.2	NA	NA	NA	NA	NA	NA	NA	F54D5.1	T23B3.1	NA	NA	NA	NA	NA	NA	NA	NA	NA	T09E8.1	R13A5.9	F22F7.3	F21C10.8	Y17D7B.6	ZK1307.1	NA	NA	NA	NA	NA	NA	NA	ZK337.2	T12A2.15	NA	K10D2.4	NA	NA	NA	NA	NA	NA	NA	T11F9.12	NA	NA	NA	NA	NA
C07A9.1	T12F5.3	NA	NA	NA	NA	NA	NA	NA	F54D5.11	T23B5.1	NA	NA	NA	NA	NA	NA	NA	NA	NA	T10B5.10	R13H7.2	F22F7.6	F21C3.1	Y17G7B.11	ZK131.2	NA	NA	NA	NA	NA	NA	NA	ZK355.2	T12A7.2	NA	K10D2.5	NA	NA	NA	NA	NA	NA	NA	T12A2.16	NA	NA	NA	NA	NA
C07A9.11	T12F5.5	NA	NA	NA	NA	NA	NA	NA	F54D5.12	T23B5.4	NA	NA	NA	NA	NA	NA	NA	NA	NA	T10B5.4	R144.1	F22G12.1	F21D12.3	Y19D10A.1	ZK131.3	NA	NA	NA	NA	NA	NA	NA	ZK384.2	T12B5.1	NA	K10D3.3	NA	NA	NA	NA	NA	NA	NA	T12A7.7	NA	NA	NA	NA	NA
C07A9.12	T12G3.6	NA	NA	NA	NA	NA	NA	NA	F54D5.2	T23C6.3	NA	NA	NA	NA	NA	NA	NA	NA	NA	T10G3.1	R153.1	F22H10.2	F21E9.3	Y19D10A.12	ZK131.7	NA	NA	NA	NA	NA	NA	NA	ZK430.3	T12B5.11	NA	K11B4.2	NA	NA	NA	NA	NA	NA	NA	T12B5.8	NA	NA	NA	NA	NA
C07A9.13	T12G3.7	NA	NA	NA	NA	NA	NA	NA	F54D5.9	T23G4.3	NA	NA	NA	NA	NA	NA	NA	NA	NA	T10G3.2	R173.3	F22H10.6	F21F3.1	Y19D10A.6	ZK1320.10	NA	NA	NA	NA	NA	NA	NA	ZK455.8	T12D8.9	NA	K11D12.2	NA	NA	NA	NA	NA	NA	NA	T12C9.3	NA	NA	NA	NA	NA
C07A9.2	T13C2.4	NA	NA	NA	NA	NA	NA	NA	F54D7.2	T23G5.2	NA	NA	NA	NA	NA	NA	NA	NA	NA	T10H10.1	R193.2	F23A7.5	F21F8.10	Y19D10B.3	ZK154.5	NA	NA	NA	NA	NA	NA	NA	ZK470.2	T13B5.1	NA	K11D2.5	NA	NA	NA	NA	NA	NA	NA	T12E12.1	NA	NA	NA	NA	NA
C07A9.3	T13C2.6	NA	NA	NA	NA	NA	NA	NA	F54E7.3	T23H2.5	NA	NA	NA	NA	NA	NA	NA	NA	NA	T10H10.2	R57.1	F23B2.11	F21F8.11	Y20F4.2	ZK177.10	NA	NA	NA	NA	NA	NA	NA	ZK484.1	T13B5.4	NA	K11E4.5	NA	NA	NA	NA	NA	NA	NA	T13C2.2	NA	NA	NA	NA	NA
C07A9.4	T13F2.2	NA	NA	NA	NA	NA	NA	NA	F54F2.5	T24C2.2	NA	NA	NA	NA	NA	NA	NA	NA	NA	T11A5.6	R74.2	F23B2.12	F21F8.3	Y20F4.3	ZK185.2	NA	NA	NA	NA	NA	NA	NA	ZK6.8	T13B5.6	NA	K11H12.8	NA	NA	NA	NA	NA	NA	NA	T13C5.4	NA	NA	NA	NA	NA
C07A9.5	T13F2.6	NA	NA	NA	NA	NA	NA	NA	F54F2.8	T24C4.1	NA	NA	NA	NA	NA	NA	NA	NA	NA	T11B7.4	T01A4.1	F23B2.5	F21F8.4	Y22D7AL.10	ZK185.3	NA	NA	NA	NA	NA	NA	NA	ZK632.11	T13B5.7	NA	K11H3.6	NA	NA	NA	NA	NA	NA	NA	T13F2.4	NA	NA	NA	NA	NA
C07A9.6	T13H5.8	NA	NA	NA	NA	NA	NA	NA	F54F7.5	T24C4.6	NA	NA	NA	NA	NA	NA	NA	NA	NA	T11B7.5	T01B4.2	F23D12.1	F21F8.6	Y22D7AL.16	ZK20.6	NA	NA	NA	NA	NA	NA	NA	ZK637.9	T13C2.7	NA	K12D12.5	NA	NA	NA	NA	NA	NA	NA	T13G4.2	NA	NA	NA	NA	NA
C07A9.7	T14B4.3	NA	NA	NA	NA	NA	NA	NA	F54H12.1	T24D3.1	NA	NA	NA	NA	NA	NA	NA	NA	NA	T11F9.1	T01B7.7	F23D12.7	F21F8.7	Y22D7AR.6	ZK250.7	NA	NA	NA	NA	NA	NA	NA	ZK666.11	T13F3.5	NA	K12H4.2	NA	NA	NA	NA	NA	NA	NA	T13G4.3	NA	NA	NA	NA	NA
C07A9.8	T14C1.3	NA	NA	NA	NA	NA	NA	NA	F55A11.1	T24D5.5	NA	NA	NA	NA	NA	NA	NA	NA	NA	T11F9.12	T01C1.2	F23F1.4	F21G4.3	Y22D7AR.8	ZK287.2	NA	NA	NA	NA	NA	NA	NA	ZK673.2	T13F3.6	NA	K12H4.5	NA	NA	NA	NA	NA	NA	NA	T13G4.7	NA	NA	NA	NA	NA
C07A9.9	T14G10.3	NA	NA	NA	NA	NA	NA	NA	F55A11.3	T24E12.1	NA	NA	NA	NA	NA	NA	NA	NA	NA	T11F9.2	T01C4.2	F23F1.6	F21H12.7	Y25C1A.11	ZK355.2	NA	NA	NA	NA	NA	NA	NA	ZK697.12	T14A8.2	NA	K12H4.8	NA	NA	NA	NA	NA	NA	NA	T13H5.1	NA	NA	NA	NA	NA
C07B5.2	T14G10.8	NA	NA	NA	NA	NA	NA	NA	F55A11.4	T24E12.11	NA	NA	NA	NA	NA	NA	NA	NA	NA	T11F9.4	T01C8.7	F23F12.12	F21H7.1	Y26D4A.10	ZK430.1	NA	NA	NA	NA	NA	NA	NA	ZK742.2	T14B1.2	NA	K12H6.2	NA	NA	NA	NA	NA	NA	NA	T14B4.8	NA	NA	NA	NA	NA
C07B5.3	T16H12.2	NA	NA	NA	NA	NA	NA	NA	F55A11.7	T24F1.1	NA	NA	NA	NA	NA	NA	NA	NA	NA	T11G6.3	T01D1.3	F23F12.13	F21H7.10	Y26D4A.21	ZK430.5	NA	NA	NA	NA	NA	NA	NA	ZK770.1	T14D7.2	NA	M01A10.3	NA	NA	NA	NA	NA	NA	NA	T14B4.9	NA	NA	NA	NA	NA
C07B5.4	T17E9.1	NA	NA	NA	NA	NA	NA	NA	F55A11.8	T24F1.2	NA	NA	NA	NA	NA	NA	NA	NA	NA	T12A7.5	T01D1.4	F23H11.6	F22A3.1	Y26G10.7	ZK455.1	NA	NA	NA	NA	NA	NA	NA	ZK792.5	T14E8.3	NA	M01B12.3	NA	NA	NA	NA	NA	NA	NA	T14C1.1	NA	NA	NA	NA	NA
C07B5.5	T19A6.1	NA	NA	NA	NA	NA	NA	NA	F55A12.10	T24H7.4	NA	NA	NA	NA	NA	NA	NA	NA	NA	T12A7.6	T01D3.1	F23H11.7	F22A3.6	Y2H9A.4	ZK507.6	NA	NA	NA	NA	NA	NA	NA	ZK829.6	T14F9.3	NA	M01D7.6	NA	NA	NA	NA	NA	NA	NA	T14F9.1	NA	NA	NA	NA	NA
C07B5.6	T19A6.3	NA	NA	NA	NA	NA	NA	NA	F55A12.5	T25B9.9	NA	NA	NA	NA	NA	NA	NA	NA	NA	T12D8.4	T01D3.7	F23H11.8	F22B5.3	Y32B12A.1	ZK512.2	NA	NA	NA	NA	NA	NA	NA	ZK849.2	T16A1.4	NA	M01E11.2	NA	NA	NA	NA	NA	NA	NA	T14G11.1	NA	NA	NA	NA	NA
C07B5.8	T19A6.4	NA	NA	NA	NA	NA	NA	NA	F55A3.1	T25E12.5	NA	NA	NA	NA	NA	NA	NA	NA	NA	T13A10.9	T01E8.1	F23H12.1	F22B5.4	Y32G9A.11	ZK512.3	NA	NA	NA	NA	NA	NA	NA	ZK856.1	T16A9.4	NA	M01E11.4	NA	NA	NA	NA	NA	NA	NA	T15B7.6	NA	NA	NA	NA	NA
C07C7.1	T19B10.11	NA	NA	NA	NA	NA	NA	NA	F55A8.2	T25G12.7	NA	NA	NA	NA	NA	NA	NA	NA	NA	T13H5.1	T01E8.8	F23H12.3	F22B7.1	Y32G9A.4	ZK550.2	NA	NA	NA	NA	NA	NA	NA	ZK858.5	T16G1.5	NA	M01E5.5	NA	NA	NA	NA	NA	NA	NA	T15D6.12	NA	NA	NA	NA	NA
C07D10.1	T19B10.6	NA	NA	NA	NA	NA	NA	NA	F55B12.3	T26A5.2	NA	NA	NA	NA	NA	NA	NA	NA	NA	T13H5.2	T01G1.2	F25B3.2	F22B7.7	Y32G9A.6	ZK563.5	NA	NA	NA	NA	NA	NA	NA	ZK863.1	T16H12.9	NA	M01F1.8	NA	NA	NA	NA	NA	NA	NA	T16G1.1	NA	NA	NA	NA	NA
C07D10.2	T19B10.7	NA	NA	NA	NA	NA	NA	NA	F55C5.5	T26A5.3	NA	NA	NA	NA	NA	NA	NA	NA	NA	T13H5.3	T01G9.1	F25B3.3	F22D6.15	Y34B4A.10	ZK593.1	NA	NA	NA	NA	NA	NA	NA	ZK863.8	T18H9.4	NA	M01F1.9	NA	NA	NA	NA	NA	NA	NA	T16G1.2	NA	NA	NA	NA	NA
C07D10.3	T19B10.8	NA	NA	NA	NA	NA	NA	NA	F55C5.7	T26A5.8	NA	NA	NA	NA	NA	NA	NA	NA	NA	T14A8.1	T02C12.1	F25B4.9	F22D6.2	Y34B4A.4	ZK616.4	NA	NA	NA	NA	NA	NA	NA	ZK945.1	T19C3.1	NA	M01G5.1	NA	NA	NA	NA	NA	NA	NA	T16G12.1	NA	NA	NA	NA	NA
C07D10.4	T19B4.5	NA	NA	NA	NA	NA	NA	NA	F55F8.9	T26A5.9	NA	NA	NA	NA	NA	NA	NA	NA	NA	T14B1.1	T02C5.5	F25C8.3	F22E10.1	Y37A1A.4	ZK622.3	NA	NA	NA	NA	NA	NA	NA	ZK945.3	T19C3.9	NA	M01G5.3	NA	NA	NA	NA	NA	NA	NA	T16H5.1	NA	NA	NA	NA	NA
C07D10.5	T19C3.8	NA	NA	NA	NA	NA	NA	NA	F55G1.4	T26C11.4	NA	NA	NA	NA	NA	NA	NA	NA	NA	T14C1.1	T02D1.4	F25C8.4	F22E10.3	Y37A1B.11	ZK637.15	NA	NA	NA	NA	NA	NA	NA	ZK994.6	T19D2.3	NA	M01G5.5	NA	NA	NA	NA	NA	NA	NA	T17H7.4	NA	NA	NA	NA	NA
C07D10.6	T19E10.1	NA	NA	NA	NA	NA	NA	NA	F55G1.5	T26C11.6	NA	NA	NA	NA	NA	NA	NA	NA	NA	T14C1.3	T02D1.5	F25C8.5	F22E12.1	Y37D8A.6	ZK637.4	NA	NA	NA	NA	NA	NA	NA	NA	T19D7.1	NA	M01G5.6	NA	NA	NA	NA	NA	NA	NA	T18D3.2	NA	NA	NA	NA	NA
C07D8.6	T19E7.2	NA	NA	NA	NA	NA	NA	NA	F55G1.6	T26C11.7	NA	NA	NA	NA	NA	NA	NA	NA	NA	T14E8.1	T02E9.2	F25D1.2	F22E12.3	Y38C1AA.9	ZK662.4	NA	NA	NA	NA	NA	NA	NA	NA	T19D7.5	NA	M02B1.3	NA	NA	NA	NA	NA	NA	NA	T18D3.5	NA	NA	NA	NA	NA
C07E3.1	T20B12.2	NA	NA	NA	NA	NA	NA	NA	F55G1.7	T26C11.8	NA	NA	NA	NA	NA	NA	NA	NA	NA	T14F9.3	T02E9.3	F25D1.4	F22E5.13	Y38C1BA.2	ZK678.1	NA	NA	NA	NA	NA	NA	NA	NA	T19D7.6	NA	M02B7.1	NA	NA	NA	NA	NA	NA	NA	T18D3.8	NA	NA	NA	NA	NA
C07E3.10	T20D3.5	NA	NA	NA	NA	NA	NA	NA	F55G1.8	T26C12.1	NA	NA	NA	NA	NA	NA	NA	NA	NA	T15B7.16	T03D8.4	F25E2.1	F22F1.3	Y38E10A.10	ZK682.2	NA	NA	NA	NA	NA	NA	NA	NA	T19E7.1	NA	M02B7.2	NA	NA	NA	NA	NA	NA	NA	T18D3.9	NA	NA	NA	NA	NA
C07E3.2	T20D3.7	NA	NA	NA	NA	NA	NA	NA	F55H2.7	T26E3.3	NA	NA	NA	NA	NA	NA	NA	NA	NA	T15B7.7	T03D8.5	F25E2.3	F22F4.3	Y38E10A.11	ZK688.6	NA	NA	NA	NA	NA	NA	NA	NA	T19E7.3	NA	M02B7.4	NA	NA	NA	NA	NA	NA	NA	T19A6.1	NA	NA	NA	NA	NA
C07E3.3	T20D3.8	NA	NA	NA	NA	NA	NA	NA	F56A11.5	T26E3.5	NA	NA	NA	NA	NA	NA	NA	NA	NA	T15D6.11	T03D8.6	F25E5.14	F22F7.8	Y38E10A.14	ZK688.7	NA	NA	NA	NA	NA	NA	NA	NA	T19H12.10	NA	M02B7.7	NA	NA	NA	NA	NA	NA	NA	T19B10.9	NA	NA	NA	NA	NA
C07E3.4	T20D4.6	NA	NA	NA	NA	NA	NA	NA	F56A3.1	T27A1.7	NA	NA	NA	NA	NA	NA	NA	NA	NA	T16A9.4	T03F7.1	F25E5.16	F22G12.1	Y38E10A.15	ZK742.3	NA	NA	NA	NA	NA	NA	NA	NA	T20B3.1	NA	M03C11.2	NA	NA	NA	NA	NA	NA	NA	T19C3.6	NA	NA	NA	NA	NA
C07E3.5	T20G5.1	NA	NA	NA	NA	NA	NA	NA	F56A3.2	T27A3.2	NA	NA	NA	NA	NA	NA	NA	NA	NA	T16G1.2	T03F7.5	F25E5.2	F22H10.2	Y38E10A.21	ZK822.2	NA	NA	NA	NA	NA	NA	NA	NA	T20C7.2	NA	M03C11.3	NA	NA	NA	NA	NA	NA	NA	T19C3.7	NA	NA	NA	NA	NA
C07E3.6	T20G5.9	NA	NA	NA	NA	NA	NA	NA	F56B3.12	T27A8.2	NA	NA	NA	NA	NA	NA	NA	NA	NA	T16G1.8	T04A8.5	F25F8.2	F22H10.6	Y38E10A.25	ZK856.5	NA	NA	NA	NA	NA	NA	NA	NA	T20F10.4	NA	M03E7.5	NA	NA	NA	NA	NA	NA	NA	T19D12.1	NA	NA	NA	NA	NA
C07E3.8	T21B10.2	NA	NA	NA	NA	NA	NA	NA	F56B3.8	T27C10.3	NA	NA	NA	NA	NA	NA	NA	NA	NA	T16G12.1	T04C10.3	F25G6.3	F23A7.3	Y38H6C.1	ZK909.5	NA	NA	NA	NA	NA	NA	NA	NA	T20G5.12	NA	M03F8.2	NA	NA	NA	NA	NA	NA	NA	T19H12.5	NA	NA	NA	NA	NA
C07E3.9	T21B10.3	NA	NA	NA	NA	NA	NA	NA	F56C11.5	T27E9.1	NA	NA	NA	NA	NA	NA	NA	NA	NA	T16H5.1	T04C12.4	F25H5.1	F23A7.5	Y38H6C.22	ZK930.1	NA	NA	NA	NA	NA	NA	NA	NA	T20G5.13	NA	M05D6.2	NA	NA	NA	NA	NA	NA	NA	T20B5.2	NA	NA	NA	NA	NA
C07F11.1	T21B10.4	NA	NA	NA	NA	NA	NA	NA	F56C9.10	T27E9.5	NA	NA	NA	NA	NA	NA	NA	NA	NA	T18D3.6	T04C12.6	F25H5.8	F23B2.11	Y38H6C.23	ZK930.2	NA	NA	NA	NA	NA	NA	NA	NA	T21B4.2	NA	M106.2	NA	NA	NA	NA	NA	NA	NA	T20F10.5	NA	NA	NA	NA	NA
C07F11.2	T21B10.5	NA	NA	NA	NA	NA	NA	NA	F56C9.11	T27E9.6	NA	NA	NA	NA	NA	NA	NA	NA	NA	T18H9.2	T04D3.3	F25H8.7	F23B2.12	Y39A3A.2	ZK938.2	NA	NA	NA	NA	NA	NA	NA	NA	T21B6.2	NA	M106.3	NA	NA	NA	NA	NA	NA	NA	T20G5.5	NA	NA	NA	NA	NA
C07G1.1	T21B10.7	NA	NA	NA	NA	NA	NA	NA	F56C9.3	T27F6.4	NA	NA	NA	NA	NA	NA	NA	NA	NA	T18H9.5	T04D3.4	F25H9.3	F23B2.5	Y39A3B.2	NA	NA	NA	NA	NA	NA	NA	NA	NA	T21C9.3	NA	M106.8	NA	NA	NA	NA	NA	NA	NA	T20G5.6	NA	NA	NA	NA	NA
C07G1.2	T21C9.13	NA	NA	NA	NA	NA	NA	NA	F56C9.6	T27F6.6	NA	NA	NA	NA	NA	NA	NA	NA	NA	T19A5.3	T04F8.6	F26A1.15	F23C8.13	Y39A3CL.2	NA	NA	NA	NA	NA	NA	NA	NA	NA	T21C9.7	NA	M110.3	NA	NA	NA	NA	NA	NA	NA	T20H4.1	NA	NA	NA	NA	NA
C07G1.3	T21C9.4	NA	NA	NA	NA	NA	NA	NA	F56D1.1	T27F6.7	NA	NA	NA	NA	NA	NA	NA	NA	NA	T19A5.5	T04G9.2	F26A1.9	F23D12.1	Y39B6A.17	NA	NA	NA	NA	NA	NA	NA	NA	NA	T21D12.12	NA	M117.2	NA	NA	NA	NA	NA	NA	NA	T21B10.6	NA	NA	NA	NA	NA
C07G1.4	T21E3.1	NA	NA	NA	NA	NA	NA	NA	F56D1.2	T28A8.3	NA	NA	NA	NA	NA	NA	NA	NA	NA	T19B10.5	T05A1.3	F26A10.1	F23D12.6	Y39B6A.24	NA	NA	NA	NA	NA	NA	NA	NA	NA	T21D9.1	NA	M117.6	NA	NA	NA	NA	NA	NA	NA	T21B6.3	NA	NA	NA	NA	NA
C07G1.5	T22A3.3	NA	NA	NA	NA	NA	NA	NA	F56D1.3	T28A8.4	NA	NA	NA	NA	NA	NA	NA	NA	NA	T19B10.9	T05A8.4	F26A3.6	F23D12.7	Y39B6A.48	NA	NA	NA	NA	NA	NA	NA	NA	NA	T21E8.2	NA	M151.3	NA	NA	NA	NA	NA	NA	NA	T21C12.1	NA	NA	NA	NA	NA
C07G1.6	T22B11.5	NA	NA	NA	NA	NA	NA	NA	F56D1.7	T28A8.6	NA	NA	NA	NA	NA	NA	NA	NA	NA	T19D12.1	T05B4.11	F26B1.4	F23F1.4	Y39D8B.2	NA	NA	NA	NA	NA	NA	NA	NA	NA	T21F2.1	NA	M151.7	NA	NA	NA	NA	NA	NA	NA	T21C9.9	NA	NA	NA	NA	NA
C07G1.7	T22D1.4	NA	NA	NA	NA	NA	NA	NA	F56D12.6	T28A8.7	NA	NA	NA	NA	NA	NA	NA	NA	NA	T19D12.2	T05B4.3	F26C11.1	F23F1.6	Y39G10AR.3	NA	NA	NA	NA	NA	NA	NA	NA	NA	T22B7.3	NA	M176.3	NA	NA	NA	NA	NA	NA	NA	T21E12.2	NA	NA	NA	NA	NA
C07G1.8	T22D1.5	NA	NA	NA	NA	NA	NA	NA	F56D2.7	T28D6.6	NA	NA	NA	NA	NA	NA	NA	NA	NA	T19D12.6	T05B4.4	F26C11.2	F23F12.12	Y39H10A.1	NA	NA	NA	NA	NA	NA	NA	NA	NA	T22B7.5	NA	M18.8	NA	NA	NA	NA	NA	NA	NA	T21G5.2	NA	NA	NA	NA	NA
C07G2.1	T22D1.9	NA	NA	NA	NA	NA	NA	NA	F56F11.4	T28D9.1	NA	NA	NA	NA	NA	NA	NA	NA	NA	T19D12.7	T05B4.8	F26D11.10	F23F12.13	Y40C7B.3	NA	NA	NA	NA	NA	NA	NA	NA	NA	T22C8.2	NA	M4.1	NA	NA	NA	NA	NA	NA	NA	T21G5.6	NA	NA	NA	NA	NA
C07G2.2	T22F3.2	NA	NA	NA	NA	NA	NA	NA	F56F3.1	T28D9.11	NA	NA	NA	NA	NA	NA	NA	NA	NA	T19D2.2	T05C1.2	F26D11.4	F23H11.6	Y40H7A.5	NA	NA	NA	NA	NA	NA	NA	NA	NA	T22D1.17	NA	M7.1	NA	NA	NA	NA	NA	NA	NA	T21H3.2	NA	NA	NA	NA	NA
C07G2.3	T22H2.5	NA	NA	NA	NA	NA	NA	NA	F56G4.4	T28D9.2	NA	NA	NA	NA	NA	NA	NA	NA	NA	T19D7.1	T05C12.10	F26D2.13	F23H11.7	Y41C4A.2	NA	NA	NA	NA	NA	NA	NA	NA	NA	T22H2.5	NA	M7.2	NA	NA	NA	NA	NA	NA	NA	T21H3.3	NA	NA	NA	NA	NA
C07G3.10	T23B12.4	NA	NA	NA	NA	NA	NA	NA	F56H1.4	T28D9.4	NA	NA	NA	NA	NA	NA	NA	NA	NA	T19E7.6	T05C12.8	F26D2.14	F23H11.8	Y41C4A.22	NA	NA	NA	NA	NA	NA	NA	NA	NA	T23B12.5	NA	M70.4	NA	NA	NA	NA	NA	NA	NA	T21H3.4	NA	NA	NA	NA	NA
C07G3.2	T23B12.6	NA	NA	NA	NA	NA	NA	NA	F56H1.5	T28F3.1	NA	NA	NA	NA	NA	NA	NA	NA	NA	T19H12.5	T05C3.2	F26E4.2	F23H12.1	Y41D4A.5	NA	NA	NA	NA	NA	NA	NA	NA	NA	T23E7.2	NA	M88.7	NA	NA	NA	NA	NA	NA	NA	T21H3.5	NA	NA	NA	NA	NA
C07G3.3	T23D8.7	NA	NA	NA	NA	NA	NA	NA	F56H1.6	VF11C1L.1	NA	NA	NA	NA	NA	NA	NA	NA	NA	T19H12.6	T05C3.4	F26E4.3	F23H12.3	Y41D4A.8	NA	NA	NA	NA	NA	NA	NA	NA	NA	T23E7.6	NA	PAR2.1	NA	NA	NA	NA	NA	NA	NA	T22A3.2	NA	NA	NA	NA	NA
C07G3.6	T23F11.1	NA	NA	NA	NA	NA	NA	NA	F56H1.7	VW02B12L.3	NA	NA	NA	NA	NA	NA	NA	NA	NA	T20B3.15	T05C3.6	F26F12.4	F25B3.2	Y41E3.6	NA	NA	NA	NA	NA	NA	NA	NA	NA	T23F1.7	NA	R01B10.6	NA	NA	NA	NA	NA	NA	NA	T22A3.4	NA	NA	NA	NA	NA
C07G3.9	T23G11.2	NA	NA	NA	NA	NA	NA	NA	F56H11.4	W01A11.1	NA	NA	NA	NA	NA	NA	NA	NA	NA	T20F10.5	T05D4.1	F26F12.8	F25C8.4	Y41G9A.4	NA	NA	NA	NA	NA	NA	NA	NA	NA	T23F2.4	NA	R01H10.7	NA	NA	NA	NA	NA	NA	NA	T22B11.2	NA	NA	NA	NA	NA
C07H4.1	T23G11.3	NA	NA	NA	NA	NA	NA	NA	F57A10.3	W01A8.1	NA	NA	NA	NA	NA	NA	NA	NA	NA	T20F5.4	T05D4.3	F26G1.5	F25C8.5	Y43C5A.3	NA	NA	NA	NA	NA	NA	NA	NA	NA	T24C12.1	NA	R01H10.8	NA	NA	NA	NA	NA	NA	NA	T22B11.3	NA	NA	NA	NA	NA
C07H4.2	T23G11.5	NA	NA	NA	NA	NA	NA	NA	F57A10.4	W01G7.3	NA	NA	NA	NA	NA	NA	NA	NA	NA	T20G5.7	T05E11.2	F26G1.6	F25D1.2	Y43E12A.2	NA	NA	NA	NA	NA	NA	NA	NA	NA	T24C2.5	NA	R01H2.6	NA	NA	NA	NA	NA	NA	NA	T22B11.4	NA	NA	NA	NA	NA
C07H6.1	T23H2.1	NA	NA	NA	NA	NA	NA	NA	F57B1.2	W01G7.4	NA	NA	NA	NA	NA	NA	NA	NA	NA	T20H12.1	T05F1.7	F27B10.1	F25D1.4	Y43F8B.3	NA	NA	NA	NA	NA	NA	NA	NA	NA	T24D5.2	NA	R02D3.7	NA	NA	NA	NA	NA	NA	NA	T22B2.4	NA	NA	NA	NA	NA
C07H6.2	T23H2.5	NA	NA	NA	NA	NA	NA	NA	F57B10.12	W02A11.4	NA	NA	NA	NA	NA	NA	NA	NA	NA	T20H4.1	T05H4.3	F27B3.2	F25D1.5	Y43F8C.12	NA	NA	NA	NA	NA	NA	NA	NA	NA	T24F1.4	NA	R02D3.8	NA	NA	NA	NA	NA	NA	NA	T22B7.1	NA	NA	NA	NA	NA
C07H6.3	T24C4.6	NA	NA	NA	NA	NA	NA	NA	F57B10.4	W02A11.5	NA	NA	NA	NA	NA	NA	NA	NA	NA	T21B10.6	T05H4.7	F27C1.11	F25E2.1	Y43F8C.2	NA	NA	NA	NA	NA	NA	NA	NA	NA	T24H7.5	NA	R02D5.8	NA	NA	NA	NA	NA	NA	NA	T22D1.18	NA	NA	NA	NA	NA
C07H6.4	T24D1.1	NA	NA	NA	NA	NA	NA	NA	F57B10.6	W02A2.6	NA	NA	NA	NA	NA	NA	NA	NA	NA	T21B4.15	T06A1.1	F27C1.13	F25G6.3	Y45F10B.10	NA	NA	NA	NA	NA	NA	NA	NA	NA	T25B6.4	NA	R02F2.4	NA	NA	NA	NA	NA	NA	NA	T22E5.1	NA	NA	NA	NA	NA
C07H6.5	T24D1.2	NA	NA	NA	NA	NA	NA	NA	F57B10.7	W02B12.10	NA	NA	NA	NA	NA	NA	NA	NA	NA	T21B4.3	T06A1.4	F27C8.2	F25G6.6	Y45F10B.13	NA	NA	NA	NA	NA	NA	NA	NA	NA	T25B9.9	NA	R02F2.9	NA	NA	NA	NA	NA	NA	NA	T22E7.2	NA	NA	NA	NA	NA
C07H6.6	T24D1.3	NA	NA	NA	NA	NA	NA	NA	F57B9.10	W02B12.15	NA	NA	NA	NA	NA	NA	NA	NA	NA	T21B6.5	T06A4.1	F27C8.4	F25H5.1	Y45F10D.13	NA	NA	NA	NA	NA	NA	NA	NA	NA	T25C12.2	NA	R03D7.4	NA	NA	NA	NA	NA	NA	NA	T22F3.12	NA	NA	NA	NA	NA
C07H6.7	T24D1.5	NA	NA	NA	NA	NA	NA	NA	F57C2.1	W02D3.11	NA	NA	NA	NA	NA	NA	NA	NA	NA	T21C12.1	T06A4.3	F27D4.5	F25H5.2	Y45F10D.2	NA	NA	NA	NA	NA	NA	NA	NA	NA	T25D3.3	NA	R03D7.7	NA	NA	NA	NA	NA	NA	NA	T23B7.3	NA	NA	NA	NA	NA
C07H6.8	T24F1.2	NA	NA	NA	NA	NA	NA	NA	F57C2.2	W02D7.5	NA	NA	NA	NA	NA	NA	NA	NA	NA	T21D12.11	T06C12.8	F27D9.2	F25H5.8	Y45G12C.4	NA	NA	NA	NA	NA	NA	NA	NA	NA	T25G3.4	NA	R04B5.4	NA	NA	NA	NA	NA	NA	NA	T23D8.2	NA	NA	NA	NA	NA
C07H6.9	T24H10.4	NA	NA	NA	NA	NA	NA	NA	F57C2.3	W02D9.1	NA	NA	NA	NA	NA	NA	NA	NA	NA	T21E12.2	T06D8.10	F27D9.7	F25H8.5	Y45G5AM.1	NA	NA	NA	NA	NA	NA	NA	NA	NA	T26C12.2	NA	R04D3.3	NA	NA	NA	NA	NA	NA	NA	T23D8.8	NA	NA	NA	NA	NA
C08A9.1	T24H7.1	NA	NA	NA	NA	NA	NA	NA	F57C2.6	W02F12.6	NA	NA	NA	NA	NA	NA	NA	NA	NA	T21F2.1	T06G6.3	F27E11.2	F25H8.6	Y46E12A.5	NA	NA	NA	NA	NA	NA	NA	NA	NA	T26C5.4	NA	R04F11.3	NA	NA	NA	NA	NA	NA	NA	T23F1.6	NA	NA	NA	NA	NA
C08A9.10	T24H7.3	NA	NA	NA	NA	NA	NA	NA	F57C9.1	W02H5.1	NA	NA	NA	NA	NA	NA	NA	NA	NA	T21H3.3	T06G6.6	F27E5.1	F25H8.7	Y46E12BL.4	NA	NA	NA	NA	NA	NA	NA	NA	NA	T26F2.1	NA	R05D11.3	NA	NA	NA	NA	NA	NA	NA	T23F11.1	NA	NA	NA	NA	NA
C08A9.3	T24H7.5	NA	NA	NA	NA	NA	NA	NA	F57C9.5	W02H5.2	NA	NA	NA	NA	NA	NA	NA	NA	NA	T21H3.4	T06H11.1	F27E5.4	F25H9.3	Y46G5A.31	NA	NA	NA	NA	NA	NA	NA	NA	NA	T26H2.9	NA	R05D11.6	NA	NA	NA	NA	NA	NA	NA	T23F11.3	NA	NA	NA	NA	NA
C08A9.6	T25E12.4	NA	NA	NA	NA	NA	NA	NA	F57C9.7	W02H5.4	NA	NA	NA	NA	NA	NA	NA	NA	NA	T22B11.3	T07D10.2	F28A12.3	F25H9.5	Y46H3D.8	NA	NA	NA	NA	NA	NA	NA	NA	NA	T27A3.8	NA	R05D11.8	NA	NA	NA	NA	NA	NA	NA	T23F11.6	NA	NA	NA	NA	NA
C08A9.7	T25E12.5	NA	NA	NA	NA	NA	NA	NA	F57G4.8	W02H5.9	NA	NA	NA	NA	NA	NA	NA	NA	NA	T22B11.4	T07D3.6	F28C6.5	F26A1.15	Y47D3A.17	NA	NA	NA	NA	NA	NA	NA	NA	NA	T27E7.6	NA	R05D3.11	NA	NA	NA	NA	NA	NA	NA	T23F2.1	NA	NA	NA	NA	NA
C08A9.8	T25G3.2	NA	NA	NA	NA	NA	NA	NA	F58A4.10	W03B1.5	NA	NA	NA	NA	NA	NA	NA	NA	NA	T22B7.1	T07F10.1	F28C6.9	F26A1.9	Y47D3B.7	NA	NA	NA	NA	NA	NA	NA	NA	NA	T27F6.8	NA	R05D3.4	NA	NA	NA	NA	NA	NA	NA	T23G4.4	NA	NA	NA	NA	NA
C08B11.1	T25G3.4	NA	NA	NA	NA	NA	NA	NA	F58A4.2	W03C9.2	NA	NA	NA	NA	NA	NA	NA	NA	NA	T22B7.8	T07F10.4	F28D1.6	F26A10.1	Y47D7A.12	NA	NA	NA	NA	NA	NA	NA	NA	NA	T28A11.21	NA	R05D7.4	NA	NA	NA	NA	NA	NA	NA	T23G5.5	NA	NA	NA	NA	NA
C08B11.2	T26A5.2	NA	NA	NA	NA	NA	NA	NA	F58A4.6	W03C9.5	NA	NA	NA	NA	NA	NA	NA	NA	NA	T22C1.7	T07G12.3	F28D1.9	F26A3.4	Y47D7A.17	NA	NA	NA	NA	NA	NA	NA	NA	NA	T28A11.4	NA	R05F9.10	NA	NA	NA	NA	NA	NA	NA	T23G5.6	NA	NA	NA	NA	NA
C08B11.3	T26A5.4	NA	NA	NA	NA	NA	NA	NA	F58A4.7	W03C9.7	NA	NA	NA	NA	NA	NA	NA	NA	NA	T22E5.5	T07H3.1	F28E10.2	F26B1.4	Y47D7A.3	NA	NA	NA	NA	NA	NA	NA	NA	NA	T28C12.4	NA	R05G6.7	NA	NA	NA	NA	NA	NA	NA	T23H2.4	NA	NA	NA	NA	NA
C08B11.4	T26C11.4	NA	NA	NA	NA	NA	NA	NA	F58A4.8	W03D2.4	NA	NA	NA	NA	NA	NA	NA	NA	NA	T22F7.3	T07H3.4	F28F5.6	F26C11.1	Y47G6A.30	NA	NA	NA	NA	NA	NA	NA	NA	NA	T28C6.8	NA	R05G9.3	NA	NA	NA	NA	NA	NA	NA	T24A6.7	NA	NA	NA	NA	NA
C08B11.5	T27A3.3	NA	NA	NA	NA	NA	NA	NA	F58B3.6	W03F8.4	NA	NA	NA	NA	NA	NA	NA	NA	NA	T22F7.5	T07H3.6	F28F8.1	F26D11.10	Y47H10A.5	NA	NA	NA	NA	NA	NA	NA	NA	NA	T28D6.5	NA	R05H10.3	NA	NA	NA	NA	NA	NA	NA	T24B8.4	NA	NA	NA	NA	NA
C08B11.6	T27A3.4	NA	NA	NA	NA	NA	NA	NA	F58B3.7	W03F9.5	NA	NA	NA	NA	NA	NA	NA	NA	NA	T22G5.2	T07H6.1	F28F9.4	F26D11.13	Y48A6B.14	NA	NA	NA	NA	NA	NA	NA	NA	NA	T28F2.6	NA	R05H5.3	NA	NA	NA	NA	NA	NA	NA	T24C2.1	NA	NA	NA	NA	NA
C08B11.7	T27A3.6	NA	NA	NA	NA	NA	NA	NA	F58B6.3	W03H9.4	NA	NA	NA	NA	NA	NA	NA	NA	NA	T23C6.5	T07H6.4	F28G4.1	F26D11.4	Y48B6A.4	NA	NA	NA	NA	NA	NA	NA	NA	NA	T28F2.8	NA	R05H5.5	NA	NA	NA	NA	NA	NA	NA	T24C4.3	NA	NA	NA	NA	NA
C08B11.8	T27A3.7	NA	NA	NA	NA	NA	NA	NA	F58D5.4	W04A8.6	NA	NA	NA	NA	NA	NA	NA	NA	NA	T23E1.1	T07H6.5	F28H1.4	F26D2.13	Y48B6A.7	NA	NA	NA	NA	NA	NA	NA	NA	NA	T28F4.5	NA	R06B9.5	NA	NA	NA	NA	NA	NA	NA	T24E12.10	NA	NA	NA	NA	NA
C08B11.9	T27A8.2	NA	NA	NA	NA	NA	NA	NA	F58D5.7	W04B5.5	NA	NA	NA	NA	NA	NA	NA	NA	NA	T23F1.5	T07H8.4	F28H6.1	F26D2.14	Y48C3A.5	NA	NA	NA	NA	NA	NA	NA	NA	NA	T28F4.6	NA	R06C1.2	NA	NA	NA	NA	NA	NA	NA	T24E12.6	NA	NA	NA	NA	NA
C08B6.1	T27E9.3	NA	NA	NA	NA	NA	NA	NA	F58E10.1	W04C9.2	NA	NA	NA	NA	NA	NA	NA	NA	NA	T23F11.3	T08A9.8	F28H7.10	F26E4.2	Y48G10A.6	NA	NA	NA	NA	NA	NA	NA	NA	NA	T28H10.4	NA	R06C1.3	NA	NA	NA	NA	NA	NA	NA	T24E12.9	NA	NA	NA	NA	NA
C08B6.10	T27E9.5	NA	NA	NA	NA	NA	NA	NA	F58E10.5	W04E12.2	NA	NA	NA	NA	NA	NA	NA	NA	NA	T23F2.1	T08B1.2	F28H7.2	F26F12.4	Y48G1BM.9	NA	NA	NA	NA	NA	NA	NA	NA	NA	VC5.5	NA	R06C7.1	NA	NA	NA	NA	NA	NA	NA	T24F1.6	NA	NA	NA	NA	NA
C08B6.11	T27F6.4	NA	NA	NA	NA	NA	NA	NA	F58E6.6	W04G3.5	NA	NA	NA	NA	NA	NA	NA	NA	NA	T23F2.2	T08B2.2	F28H7.3	F26F12.5	Y48G1BR.1	NA	NA	NA	NA	NA	NA	NA	NA	NA	VC5.6	NA	R06F6.12	NA	NA	NA	NA	NA	NA	NA	T24F1.7	NA	NA	NA	NA	NA
C08B6.2	T27F6.7	NA	NA	NA	NA	NA	NA	NA	F58E6.8	W05H7.4	NA	NA	NA	NA	NA	NA	NA	NA	NA	T23F6.2	T08E11.3	F28H7.6	F26F12.8	Y48G8AL.12	NA	NA	NA	NA	NA	NA	NA	NA	NA	VW02B12L.2	NA	R07E4.5	NA	NA	NA	NA	NA	NA	NA	T24H10.7	NA	NA	NA	NA	NA
C08B6.3	T28A11.21	NA	NA	NA	NA	NA	NA	NA	F58G1.1	W06A11.3	NA	NA	NA	NA	NA	NA	NA	NA	NA	T23F6.5	T08E11.4	F28H7.8	F26G1.2	Y49A3A.2	NA	NA	NA	NA	NA	NA	NA	NA	NA	W01A11.1	NA	R07E5.11	NA	NA	NA	NA	NA	NA	NA	T25B9.10	NA	NA	NA	NA	NA
C08B6.4	T28A8.4	NA	NA	NA	NA	NA	NA	NA	F58G1.2	W06A7.5	NA	NA	NA	NA	NA	NA	NA	NA	NA	T23G11.6	T08G2.2	F29A7.4	F26G1.4	Y49E10.16	NA	NA	NA	NA	NA	NA	NA	NA	NA	W01A11.7	NA	R07E5.14	NA	NA	NA	NA	NA	NA	NA	T25B9.11	NA	NA	NA	NA	NA
C08B6.6	T28D9.11	NA	NA	NA	NA	NA	NA	NA	F58G11.1	W06D11.1	NA	NA	NA	NA	NA	NA	NA	NA	NA	T23G4.4	T08G5.12	F29B9.12	F26G1.5	Y4C6B.7	NA	NA	NA	NA	NA	NA	NA	NA	NA	W01A8.2	NA	R07E5.7	NA	NA	NA	NA	NA	NA	NA	T25B9.12	NA	NA	NA	NA	NA
C08B6.7	T28D9.4	NA	NA	NA	NA	NA	NA	NA	F58G11.3	W06D11.2	NA	NA	NA	NA	NA	NA	NA	NA	NA	T23H2.4	T09A12.3	F29B9.9	F27B10.1	Y50D4B.6	NA	NA	NA	NA	NA	NA	NA	NA	NA	W01A8.6	NA	R07G3.1	NA	NA	NA	NA	NA	NA	NA	T25B9.3	NA	NA	NA	NA	NA
C08B6.8	T28F3.3	NA	NA	NA	NA	NA	NA	NA	F58G11.5	W06E11.5	NA	NA	NA	NA	NA	NA	NA	NA	NA	T23H4.1	T09B4.7	F29F11.1	F27B3.2	Y51A2B.8	NA	NA	NA	NA	NA	NA	NA	NA	NA	W01A8.8	NA	R07G3.3	NA	NA	NA	NA	NA	NA	NA	T25C12.1	NA	NA	NA	NA	NA
C08B6.9	VC5.4	NA	NA	NA	NA	NA	NA	NA	F58G4.4	W06H3.1	NA	NA	NA	NA	NA	NA	NA	NA	NA	T24H10.7	T09B9.2	F29F11.4	F27C1.13	Y51A2D.4	NA	NA	NA	NA	NA	NA	NA	NA	NA	W01B6.7	NA	R07G3.7	NA	NA	NA	NA	NA	NA	NA	T25F10.3	NA	NA	NA	NA	NA
C08C3.1	VF11C1L.1	NA	NA	NA	NA	NA	NA	NA	F58H1.3	W06H3.3	NA	NA	NA	NA	NA	NA	NA	NA	NA	T25B2.3	T09B9.5	F29G6.1	F27C8.2	Y51B9A.8	NA	NA	NA	NA	NA	NA	NA	NA	NA	W01C9.2	NA	R07H5.1	NA	NA	NA	NA	NA	NA	NA	T25G12.3	NA	NA	NA	NA	NA
C08C3.2	W01A11.1	NA	NA	NA	NA	NA	NA	NA	F59A2.1	W07A8.2	NA	NA	NA	NA	NA	NA	NA	NA	NA	T25B2.4	T09D3.4	F30A10.13	F27C8.4	Y51H4A.32	NA	NA	NA	NA	NA	NA	NA	NA	NA	W01C9.5	NA	R08C7.10	NA	NA	NA	NA	NA	NA	NA	T26C12.4	NA	NA	NA	NA	NA
C08C3.3	W01A11.2	NA	NA	NA	NA	NA	NA	NA	F59A2.3	W07A8.3	NA	NA	NA	NA	NA	NA	NA	NA	NA	T25B6.2	T09E11.3	F30A10.2	F27D4.5	Y53C12B.7	NA	NA	NA	NA	NA	NA	NA	NA	NA	W01F3.1	NA	R08C7.2	NA	NA	NA	NA	NA	NA	NA	T26C5.3	NA	NA	NA	NA	NA
C08C3.4	W01A8.1	NA	NA	NA	NA	NA	NA	NA	F59A3.12	W08E12.1	NA	NA	NA	NA	NA	NA	NA	NA	NA	T25B9.10	T10A3.1	F30F8.2	F27D9.2	Y53F4B.25	NA	NA	NA	NA	NA	NA	NA	NA	NA	W01H2.3	NA	R08D7.1	NA	NA	NA	NA	NA	NA	NA	T26C5.5	NA	NA	NA	NA	NA
C08D8.1	W01A8.5	NA	NA	NA	NA	NA	NA	NA	F59A3.2	W08F4.8	NA	NA	NA	NA	NA	NA	NA	NA	NA	T25C12.1	T10B10.4	F30H5.5	F27D9.7	Y53F4B.51	NA	NA	NA	NA	NA	NA	NA	NA	NA	W02B3.4	NA	R08D7.5	NA	NA	NA	NA	NA	NA	NA	T26E3.10	NA	NA	NA	NA	NA
C08D8.2	W01D2.5	NA	NA	NA	NA	NA	NA	NA	F59A3.4	W09B7.2	NA	NA	NA	NA	NA	NA	NA	NA	NA	T25C12.3	T10B10.5	F31A3.3	F27E11.1	Y53G8AL.1	NA	NA	NA	NA	NA	NA	NA	NA	NA	W02C12.2	NA	R08E5.2	NA	NA	NA	NA	NA	NA	NA	T26E4.9	NA	NA	NA	NA	NA
C08E3.1	W01G7.3	NA	NA	NA	NA	NA	NA	NA	F59A3.9	W09C3.6	NA	NA	NA	NA	NA	NA	NA	NA	NA	T25C8.2	T10B5.10	F31B12.4	F27E11.2	Y53G8AL.3	NA	NA	NA	NA	NA	NA	NA	NA	NA	W03A5.3	NA	R09A8.1	NA	NA	NA	NA	NA	NA	NA	T26H2.7	NA	NA	NA	NA	NA
C08E3.10	W02A2.6	NA	NA	NA	NA	NA	NA	NA	F59A7.12	W09D6.6	NA	NA	NA	NA	NA	NA	NA	NA	NA	T25F10.1	T10B5.4	F31B9.1	F27E5.1	Y53G8AM.6	NA	NA	NA	NA	NA	NA	NA	NA	NA	W03D2.7	NA	R09A8.2	NA	NA	NA	NA	NA	NA	NA	T26H5.8	NA	NA	NA	NA	NA
C08E3.13	W02A2.7	NA	NA	NA	NA	NA	NA	NA	F59B1.8	W09G3.6	NA	NA	NA	NA	NA	NA	NA	NA	NA	T25F10.4	T10E10.3	F31D4.5	F27E5.4	Y54F10AM.2	NA	NA	NA	NA	NA	NA	NA	NA	NA	W04B5.1	NA	R09B3.1	NA	NA	NA	NA	NA	NA	NA	T27A1.4	NA	NA	NA	NA	NA
C08E3.15	W02B12.10	NA	NA	NA	NA	NA	NA	NA	F59B2.5	W09G3.7	NA	NA	NA	NA	NA	NA	NA	NA	NA	T25F10.5	T10E10.4	F31D4.6	F27E5.5	Y54G11A.5	NA	NA	NA	NA	NA	NA	NA	NA	NA	W04B5.2	NA	R09F10.8	NA	NA	NA	NA	NA	NA	NA	T27B7.2	NA	NA	NA	NA	NA
C08E3.3	W02B12.15	NA	NA	NA	NA	NA	NA	NA	F59B2.6	Y102E9.2	NA	NA	NA	NA	NA	NA	NA	NA	NA	T25F10.6	T10G3.2	F31D5.5	F27E5.7	Y54G11B.1	NA	NA	NA	NA	NA	NA	NA	NA	NA	W04C9.5	NA	R107.5	NA	NA	NA	NA	NA	NA	NA	T27B7.6	NA	NA	NA	NA	NA
C08E3.4	W02D7.5	NA	NA	NA	NA	NA	NA	NA	F59B2.7	Y104H12D.4	NA	NA	NA	NA	NA	NA	NA	NA	NA	T25G12.6	T10G3.8	F31E3.2	F28A12.3	Y54G2A.11	NA	NA	NA	NA	NA	NA	NA	NA	NA	W04E12.7	NA	R10A10.2	NA	NA	NA	NA	NA	NA	NA	T27C10.2	NA	NA	NA	NA	NA
C08E3.5	W02D9.2	NA	NA	NA	NA	NA	NA	NA	F59D12.5	Y105C5A.15	NA	NA	NA	NA	NA	NA	NA	NA	NA	T26C12.4	T10H10.2	F31E8.2	F28B12.1	Y54G2A.26	NA	NA	NA	NA	NA	NA	NA	NA	NA	W04G3.11	NA	R10D12.12	NA	NA	NA	NA	NA	NA	NA	T27C5.12	NA	NA	NA	NA	NA
C08E3.6	W02D9.4	NA	NA	NA	NA	NA	NA	NA	F59E10.1	Y105C5B.11	NA	NA	NA	NA	NA	NA	NA	NA	NA	T26C5.2	T10H4.2	F31F6.4	F28C6.5	Y54G2A.28	NA	NA	NA	NA	NA	NA	NA	NA	NA	W04G3.5	NA	R10D12.13	NA	NA	NA	NA	NA	NA	NA	T27E4.1	NA	NA	NA	NA	NA
C08E3.7	W02F12.3	NA	NA	NA	NA	NA	NA	NA	F59E12.1	Y105C5B.14	NA	NA	NA	NA	NA	NA	NA	NA	NA	T26F2.1	T11B7.3	F31F7.2	F28C6.9	Y54G2A.33	NA	NA	NA	NA	NA	NA	NA	NA	NA	W04G5.10	NA	R10D12.14	NA	NA	NA	NA	NA	NA	NA	T27E4.5	NA	NA	NA	NA	NA
C08E3.8	W02F12.4	NA	NA	NA	NA	NA	NA	NA	F59E12.13	Y105C5B.19	NA	NA	NA	NA	NA	NA	NA	NA	NA	T26H5.8	T11F9.1	F32A5.3	F28D1.6	Y54G2A.38	NA	NA	NA	NA	NA	NA	NA	NA	NA	W04G5.2	NA	R10E11.3	NA	NA	NA	NA	NA	NA	NA	T27E9.9	NA	NA	NA	NA	NA
C08E3.9	W02F12.5	NA	NA	NA	NA	NA	NA	NA	F59E12.4	Y105E8A.14	NA	NA	NA	NA	NA	NA	NA	NA	NA	T27A1.6	T11F9.12	F32A5.5	F28E10.2	Y54G9A.3	NA	NA	NA	NA	NA	NA	NA	NA	NA	W04G5.6	NA	R10E11.4	NA	NA	NA	NA	NA	NA	NA	T28A11.11	NA	NA	NA	NA	NA
C08E8.1	W03B1.4	NA	NA	NA	NA	NA	NA	NA	F59E12.5	Y105E8A.21	NA	NA	NA	NA	NA	NA	NA	NA	NA	T27A10.6	T11F9.4	F32A6.5	F28F5.6	Y55D5A.4	NA	NA	NA	NA	NA	NA	NA	NA	NA	W04G5.9	NA	R10E12.1	NA	NA	NA	NA	NA	NA	NA	T28A8.1	NA	NA	NA	NA	NA
C08E8.10	W03C9.2	NA	NA	NA	NA	NA	NA	NA	F59E12.9	Y105E8B.4	NA	NA	NA	NA	NA	NA	NA	NA	NA	T27A3.1	T12A7.2	F32A7.6	F28F8.1	Y55F3BR.4	NA	NA	NA	NA	NA	NA	NA	NA	NA	W05B10.4	NA	R10E4.5	NA	NA	NA	NA	NA	NA	NA	T28B4.1	NA	NA	NA	NA	NA
C08E8.11	W03C9.5	NA	NA	NA	NA	NA	NA	NA	F59G1.1	Y105E8B.6	NA	NA	NA	NA	NA	NA	NA	NA	NA	T27B1.1	T12A7.5	F32B4.1	F28F9.3	Y55F3BR.6	NA	NA	NA	NA	NA	NA	NA	NA	NA	W05E10.1	NA	R10H10.1	NA	NA	NA	NA	NA	NA	NA	T28B4.3	NA	NA	NA	NA	NA
C08E8.3	W03C9.7	NA	NA	NA	NA	NA	NA	NA	F59G1.3	Y106G6A.5	NA	NA	NA	NA	NA	NA	NA	NA	NA	T27B2.1	T12A7.6	F32B5.2	F28G4.1	Y57A10A.10	NA	NA	NA	NA	NA	NA	NA	NA	NA	W05E7.1	NA	R119.2	NA	NA	NA	NA	NA	NA	NA	T28B4.4	NA	NA	NA	NA	NA
C08E8.4	W03F9.1	NA	NA	NA	NA	NA	NA	NA	F59G1.5	Y106G6H.6	NA	NA	NA	NA	NA	NA	NA	NA	NA	T27C4.2	T12B5.2	F32D1.11	F28H1.4	Y57G11C.44	NA	NA	NA	NA	NA	NA	NA	NA	NA	W06D12.3	NA	R119.7	NA	NA	NA	NA	NA	NA	NA	T28B8.2	NA	NA	NA	NA	NA
C08E8.5	W03G9.2	NA	NA	NA	NA	NA	NA	NA	F59G1.7	Y108G3AL.2	NA	NA	NA	NA	NA	NA	NA	NA	NA	T27D1.3	T12C9.3	F32D1.4	F28H6.1	Y57G11C.45	NA	NA	NA	NA	NA	NA	NA	NA	NA	W06G6.10	NA	R11A8.2	NA	NA	NA	NA	NA	NA	NA	T28D6.4	NA	NA	NA	NA	NA
C08F1.10	W03G9.4	NA	NA	NA	NA	NA	NA	NA	F59H5.1	Y108G3AL.7	NA	NA	NA	NA	NA	NA	NA	NA	NA	T27D12.2	T12D8.4	F32D8.1	F28H7.10	Y57G11C.49	NA	NA	NA	NA	NA	NA	NA	NA	NA	W06G6.11	NA	R11H6.5	NA	NA	NA	NA	NA	NA	NA	T28D9.7	NA	NA	NA	NA	NA
C08F1.11	W04B5.4	NA	NA	NA	NA	NA	NA	NA	F59H6.11	Y10G11A.90	NA	NA	NA	NA	NA	NA	NA	NA	NA	T27E4.5	T13A10.9	F32D8.10	F28H7.3	Y57G7A.9	NA	NA	NA	NA	NA	NA	NA	NA	NA	W06G6.17	NA	R12C12.2	NA	NA	NA	NA	NA	NA	NA	T28F2.3	NA	NA	NA	NA	NA
C08F1.3	W05B10.1	NA	NA	NA	NA	NA	NA	NA	F59H6.8	Y110A2AL.1	NA	NA	NA	NA	NA	NA	NA	NA	NA	T27E4.6	T13C2.2	F32D8.12	F28H7.8	Y59A8A.3	NA	NA	NA	NA	NA	NA	NA	NA	NA	W07A12.4	NA	R12C12.6	NA	NA	NA	NA	NA	NA	NA	T28F2.5	NA	NA	NA	NA	NA
C08F1.4	W05F2.3	NA	NA	NA	NA	NA	NA	NA	F59H6.9	Y110A2AM.1	NA	NA	NA	NA	NA	NA	NA	NA	NA	T28D9.3	T13F2.4	F32D8.15	F29A7.4	Y59C2A.1	NA	NA	NA	NA	NA	NA	NA	NA	NA	W07B8.4	NA	R12C12.7	NA	NA	NA	NA	NA	NA	NA	T28F3.4	NA	NA	NA	NA	NA
C08F1.5	W05F2.6	NA	NA	NA	NA	NA	NA	NA	H02I12.1	Y110A2AM.4	NA	NA	NA	NA	NA	NA	NA	NA	NA	T28F2.7	T13G4.3	F32E10.7	F29B9.12	Y59E1A.1	NA	NA	NA	NA	NA	NA	NA	NA	NA	W07G4.7	NA	R12E2.1	NA	NA	NA	NA	NA	NA	NA	T28F3.9	NA	NA	NA	NA	NA
C08F1.6	W06A11.4	NA	NA	NA	NA	NA	NA	NA	H02I12.5	Y110A2AR.1	NA	NA	NA	NA	NA	NA	NA	NA	NA	T28F3.5	T13H5.3	F32E10.8	F29B9.9	Y59H11AM.4	NA	NA	NA	NA	NA	NA	NA	NA	NA	W08A12.4	NA	R12E2.10	NA	NA	NA	NA	NA	NA	NA	T28F4.2	NA	NA	NA	NA	NA
C08F1.8	W06B4.1	NA	NA	NA	NA	NA	NA	NA	H04D03.2	Y110A2AR.2	NA	NA	NA	NA	NA	NA	NA	NA	NA	T28F3.8	T14E8.3	F32H2.8	F29F11.4	Y59H11AR.2	NA	NA	NA	NA	NA	NA	NA	NA	NA	W08D2.3	NA	R12E2.2	NA	NA	NA	NA	NA	NA	NA	VZC374L.1	NA	NA	NA	NA	NA
C08F11.1	W06D11.1	NA	NA	NA	NA	NA	NA	NA	H04D03.4	Y110A7A.10	NA	NA	NA	NA	NA	NA	NA	NA	NA	VC5.3	T14F9.3	F32H2.9	F29G6.1	Y5F2A.3	NA	NA	NA	NA	NA	NA	NA	NA	NA	W08D2.6	NA	R12E2.3	NA	NA	NA	NA	NA	NA	NA	VZK822L.2	NA	NA	NA	NA	NA
C08F11.10	W06D11.3	NA	NA	NA	NA	NA	NA	NA	H04D03.6	Y110A7A.14	NA	NA	NA	NA	NA	NA	NA	NA	NA	VZC374L.1	T14G10.1	F32H5.1	F29G9.4	Y61B8A.4	NA	NA	NA	NA	NA	NA	NA	NA	NA	W08F4.5	NA	R13A1.7	NA	NA	NA	NA	NA	NA	NA	W01B11.5	NA	NA	NA	NA	NA
C08F11.11	W06D4.6	NA	NA	NA	NA	NA	NA	NA	H04M03.3	Y110A7A.6	NA	NA	NA	NA	NA	NA	NA	NA	NA	W01A11.4	T14G12.6	F32H5.4	F30A10.2	Y65B4BR.1	NA	NA	NA	NA	NA	NA	NA	NA	NA	W09B7.3	NA	R13A5.1	NA	NA	NA	NA	NA	NA	NA	W02A2.3	NA	NA	NA	NA	NA
C08F11.12	W06E11.5	NA	NA	NA	NA	NA	NA	NA	H05L14.2	Y110A7A.8	NA	NA	NA	NA	NA	NA	NA	NA	NA	W01C9.1	T15B7.16	F32H5.7	F30F8.10	Y66A7A.1	NA	NA	NA	NA	NA	NA	NA	NA	NA	W09C2.10	NA	R13A5.7	NA	NA	NA	NA	NA	NA	NA	W02B3.2	NA	NA	NA	NA	NA
C08F11.13	W06H3.3	NA	NA	NA	NA	NA	NA	NA	H06H21.11	Y111B2A.16	NA	NA	NA	NA	NA	NA	NA	NA	NA	W01C9.2	T15D6.12	F33A8.10	F30F8.2	Y67D8A.3	NA	NA	NA	NA	NA	NA	NA	NA	NA	W09C2.7	NA	R144.10	NA	NA	NA	NA	NA	NA	NA	W02B8.1	NA	NA	NA	NA	NA
C08F11.17	W07A12.7	NA	NA	NA	NA	NA	NA	NA	H06H21.6	Y111B2A.17	NA	NA	NA	NA	NA	NA	NA	NA	NA	W01C9.3	T16G1.1	F33A8.2	F30H5.5	Y67D8C.10	NA	NA	NA	NA	NA	NA	NA	NA	NA	W09C2.8	NA	R144.3	NA	NA	NA	NA	NA	NA	NA	W02B8.5	NA	NA	NA	NA	NA
C08F11.3	W07G4.4	NA	NA	NA	NA	NA	NA	NA	H11E01.2	Y111B2A.18	NA	NA	NA	NA	NA	NA	NA	NA	NA	W02A2.2	T16G1.8	F33A8.7	F31A3.3	Y68A4A.7	NA	NA	NA	NA	NA	NA	NA	NA	NA	W09C2.9	NA	R144.4	NA	NA	NA	NA	NA	NA	NA	W02D7.3	NA	NA	NA	NA	NA
C08F11.5	W08A12.1	NA	NA	NA	NA	NA	NA	NA	H11L12.1	Y111B2A.19	NA	NA	NA	NA	NA	NA	NA	NA	NA	W02B12.1	T16G12.1	F33C8.2	F31B12.4	Y69A2AR.31	NA	NA	NA	NA	NA	NA	NA	NA	NA	W09D12.1	NA	R144.5	NA	NA	NA	NA	NA	NA	NA	W02F12.2	NA	NA	NA	NA	NA
C08F11.7	W08D2.5	NA	NA	NA	NA	NA	NA	NA	H12D21.13	Y111B2A.2	NA	NA	NA	NA	NA	NA	NA	NA	NA	W02B3.2	T16H5.1	F33C8.3	F31B9.1	Y69H2.14	NA	NA	NA	NA	NA	NA	NA	NA	NA	W09G10.1	NA	R148.2	NA	NA	NA	NA	NA	NA	NA	W02F12.7	NA	NA	NA	NA	NA
C08F11.8	W08E12.7	NA	NA	NA	NA	NA	NA	NA	H12D21.14	Y111B2A.24	NA	NA	NA	NA	NA	NA	NA	NA	NA	W02B8.3	T17A3.8	F33C8.4	F31D4.6	Y69H2.3	NA	NA	NA	NA	NA	NA	NA	NA	NA	W09G12.8	NA	R148.4	NA	NA	NA	NA	NA	NA	NA	W02G9.2	NA	NA	NA	NA	NA
C08F8.1	W08E3.3	NA	NA	NA	NA	NA	NA	NA	H12D21.15	Y111B2A.3	NA	NA	NA	NA	NA	NA	NA	NA	NA	W02B8.4	T17H7.1	F33D11.3	F31E3.2	Y6E2A.4	NA	NA	NA	NA	NA	NA	NA	NA	NA	W10C8.4	NA	R151.10	NA	NA	NA	NA	NA	NA	NA	W02H3.3	NA	NA	NA	NA	NA
C08F8.2	W08F4.3	NA	NA	NA	NA	NA	NA	NA	H12I13.4	Y113G7A.8	NA	NA	NA	NA	NA	NA	NA	NA	NA	W02F12.7	T17H7.4	F33D11.5	F31E8.2	Y6G8.14	NA	NA	NA	NA	NA	NA	NA	NA	NA	W10C8.6	NA	R151.8	NA	NA	NA	NA	NA	NA	NA	W02H5.5	NA	NA	NA	NA	NA
C08F8.3	W08F4.8	NA	NA	NA	NA	NA	NA	NA	H14A12.2	Y113G7A.9	NA	NA	NA	NA	NA	NA	NA	NA	NA	W02H3.3	T17H7.7	F33D11.8	F31F6.4	Y6G8.2	NA	NA	NA	NA	NA	NA	NA	NA	NA	W10G11.3	NA	R17.2	NA	NA	NA	NA	NA	NA	NA	W03A5.7	NA	NA	NA	NA	NA
C08F8.4	W09C3.6	NA	NA	NA	NA	NA	NA	NA	H14A12.3	Y113G7B.17	NA	NA	NA	NA	NA	NA	NA	NA	NA	W03C9.4	T18D3.4	F33D4.3	F31F7.1	Y6G8.6	NA	NA	NA	NA	NA	NA	NA	NA	NA	W10G11.4	NA	R186.7	NA	NA	NA	NA	NA	NA	NA	W03C9.3	NA	NA	NA	NA	NA
C08F8.5	W09D10.1	NA	NA	NA	NA	NA	NA	NA	H14A12.5	Y113G7B.18	NA	NA	NA	NA	NA	NA	NA	NA	NA	W03C9.6	T18H9.2	F34D10.5	F31F7.2	Y71F9AL.10	NA	NA	NA	NA	NA	NA	NA	NA	NA	Y102A5C.19	NA	R53.1	NA	NA	NA	NA	NA	NA	NA	W03D2.9	NA	NA	NA	NA	NA
C08F8.6	W09D10.2	NA	NA	NA	NA	NA	NA	NA	H14E04.2	Y113G7B.4	NA	NA	NA	NA	NA	NA	NA	NA	NA	W03D2.9	T19A5.3	F34D6.3	F32A11.6	Y71F9B.3	NA	NA	NA	NA	NA	NA	NA	NA	NA	Y105C5A.17	NA	R53.4	NA	NA	NA	NA	NA	NA	NA	W03F8.1	NA	NA	NA	NA	NA
C08F8.7	W09D6.6	NA	NA	NA	NA	NA	NA	NA	H14E04.3	Y113G7B.5	NA	NA	NA	NA	NA	NA	NA	NA	NA	W03D8.8	T19C3.1	F34D6.4	F32A5.2	Y71G12B.21	NA	NA	NA	NA	NA	NA	NA	NA	NA	Y105C5A.8	NA	R53.6	NA	NA	NA	NA	NA	NA	NA	W03F8.6	NA	NA	NA	NA	NA
C08F8.8	W09G3.7	NA	NA	NA	NA	NA	NA	NA	H14E04.5	Y113G7B.6	NA	NA	NA	NA	NA	NA	NA	NA	NA	W03F8.1	T19C3.3	F34H10.2	F32A5.3	Y71G12B.4	NA	NA	NA	NA	NA	NA	NA	NA	NA	Y105C5B.28	NA	R74.4	NA	NA	NA	NA	NA	NA	NA	W03F8.9	NA	NA	NA	NA	NA
C08F8.9	W10D9.4	NA	NA	NA	NA	NA	NA	NA	H17B01.4	Y113G7B.8	NA	NA	NA	NA	NA	NA	NA	NA	NA	W03F8.2	T19D12.1	F34H10.4	F32A5.5	Y71H10B.1	NA	NA	NA	NA	NA	NA	NA	NA	NA	Y106G6D.6	NA	R74.7	NA	NA	NA	NA	NA	NA	NA	W03G1.1	NA	NA	NA	NA	NA
C08G5.2	Y102A5C.19	NA	NA	NA	NA	NA	NA	NA	H19N07.1	Y113G7C.1	NA	NA	NA	NA	NA	NA	NA	NA	NA	W03G1.1	T19D12.2	F35A5.1	F32A6.5	Y71H2AM.15	NA	NA	NA	NA	NA	NA	NA	NA	NA	Y106G6D.8	NA	R74.8	NA	NA	NA	NA	NA	NA	NA	W03G9.7	NA	NA	NA	NA	NA
C08G5.3	Y102E9.2	NA	NA	NA	NA	NA	NA	NA	H20J04.2	Y116A8A.9	NA	NA	NA	NA	NA	NA	NA	NA	NA	W03G11.3	T19D12.4	F35A5.2	F32A7.6	Y73B3A.13	NA	NA	NA	NA	NA	NA	NA	NA	NA	Y10G11A.2	NA	T01B11.3	NA	NA	NA	NA	NA	NA	NA	W04B5.6	NA	NA	NA	NA	NA
C08G5.4	Y104H12BR.1	NA	NA	NA	NA	NA	NA	NA	H20J04.9	Y116A8B.1	NA	NA	NA	NA	NA	NA	NA	NA	NA	W04E12.9	T19E7.1	F35A5.4	F32A7.8	Y73B3A.5	NA	NA	NA	NA	NA	NA	NA	NA	NA	Y110A7A.6	NA	T01B7.3	NA	NA	NA	NA	NA	NA	NA	W04G3.7	NA	NA	NA	NA	NA
C08G5.6	Y105E8A.8	NA	NA	NA	NA	NA	NA	NA	H21P03.1	Y116A8C.13	NA	NA	NA	NA	NA	NA	NA	NA	NA	W04G3.1	T19F4.1	F35B12.6	F32B4.1	Y73B6A.5	NA	NA	NA	NA	NA	NA	NA	NA	NA	Y113G7A.16	NA	T01B7.4	NA	NA	NA	NA	NA	NA	NA	W04G5.5	NA	NA	NA	NA	NA
C08G5.7	Y105E8B.8	NA	NA	NA	NA	NA	NA	NA	H21P03.2	Y116A8C.17	NA	NA	NA	NA	NA	NA	NA	NA	NA	W04G3.2	T20B3.15	F35B12.7	F32D1.4	Y73F4A.2	NA	NA	NA	NA	NA	NA	NA	NA	NA	Y113G7A.4	NA	T01B7.6	NA	NA	NA	NA	NA	NA	NA	W05F2.4	NA	NA	NA	NA	NA
C08G9.1	Y106G6H.14	NA	NA	NA	NA	NA	NA	NA	H21P03.3	Y116A8C.19	NA	NA	NA	NA	NA	NA	NA	NA	NA	W04G3.3	T20B3.2	F35B12.8	F32D8.1	Y73F4A.3	NA	NA	NA	NA	NA	NA	NA	NA	NA	Y116A8B.4	NA	T01C3.10	NA	NA	NA	NA	NA	NA	NA	W05F2.8	NA	NA	NA	NA	NA
C08G9.2	Y106G6H.16	NA	NA	NA	NA	NA	NA	NA	H25P19.1	Y116A8C.20	NA	NA	NA	NA	NA	NA	NA	NA	NA	W04G3.4	T20B6.3	F35C11.1	F32D8.10	Y73F8A.21	NA	NA	NA	NA	NA	NA	NA	NA	NA	Y119D3A.3	NA	T01C3.2	NA	NA	NA	NA	NA	NA	NA	W05H12.1	NA	NA	NA	NA	NA
C08H9.1	Y106G6H.5	NA	NA	NA	NA	NA	NA	NA	H26D21.1	Y116A8C.22	NA	NA	NA	NA	NA	NA	NA	NA	NA	W04G3.8	T20F10.4	F35C11.3	F32D8.15	Y75B12B.7	NA	NA	NA	NA	NA	NA	NA	NA	NA	Y119D3A.4	NA	T01C3.9	NA	NA	NA	NA	NA	NA	NA	W05H7.1	NA	NA	NA	NA	NA
C08H9.13	Y106G6H.8	NA	NA	NA	NA	NA	NA	NA	H26D21.2	Y116A8C.35	NA	NA	NA	NA	NA	NA	NA	NA	NA	W04G5.10	T20F10.5	F35C11.4	F32D8.9	Y75B8A.26	NA	NA	NA	NA	NA	NA	NA	NA	NA	Y119D3B.21	NA	T01E8.4	NA	NA	NA	NA	NA	NA	NA	W06A7.2	NA	NA	NA	NA	NA
C08H9.14	Y10G11A.1	NA	NA	NA	NA	NA	NA	NA	H27A22.1	Y116A8C.4	NA	NA	NA	NA	NA	NA	NA	NA	NA	W04G5.2	T20F5.4	F35C11.7	F32H2.8	Y75B8A.32	NA	NA	NA	NA	NA	NA	NA	NA	NA	Y119D3B.7	NA	T01E8.6	NA	NA	NA	NA	NA	NA	NA	W06B3.2	NA	NA	NA	NA	NA
C08H9.15	Y10G11A.90	NA	NA	NA	NA	NA	NA	NA	H27M09.3	Y116A8C.5	NA	NA	NA	NA	NA	NA	NA	NA	NA	W04G5.5	T20G5.6	F35C12.2	F32H5.1	Y75B8A.34	NA	NA	NA	NA	NA	NA	NA	NA	NA	Y12A6A.1	NA	T01G5.7	NA	NA	NA	NA	NA	NA	NA	W06D12.1	NA	NA	NA	NA	NA
C08H9.16	Y110A2AL.10	NA	NA	NA	NA	NA	NA	NA	H28O16.1	Y119C1A.1	NA	NA	NA	NA	NA	NA	NA	NA	NA	W04G5.9	T21B10.6	F35C5.11	F32H5.4	Y75B8A.35	NA	NA	NA	NA	NA	NA	NA	NA	NA	Y17D7B.4	NA	T01G9.5	NA	NA	NA	NA	NA	NA	NA	W06H8.8	NA	NA	NA	NA	NA
C08H9.2	Y110A2AL.12	NA	NA	NA	NA	NA	NA	NA	H28O16.2	Y119D3B.11	NA	NA	NA	NA	NA	NA	NA	NA	NA	W04H10.3	T21B4.15	F35C5.5	F32H5.6	Y76A2B.6	NA	NA	NA	NA	NA	NA	NA	NA	NA	Y17G9A.2	NA	T02C12.2	NA	NA	NA	NA	NA	NA	NA	W07A12.8	NA	NA	NA	NA	NA
C08H9.3	Y110A2AR.1	NA	NA	NA	NA	NA	NA	NA	H31G24.3	Y119D3B.14	NA	NA	NA	NA	NA	NA	NA	NA	NA	W05B2.4	T21B6.3	F35C5.6	F32H5.7	Y79H2A.1	NA	NA	NA	NA	NA	NA	NA	NA	NA	Y19D10A.10	NA	T02C12.3	NA	NA	NA	NA	NA	NA	NA	W07A8.1	NA	NA	NA	NA	NA
C08H9.4	Y110A7A.10	NA	NA	NA	NA	NA	NA	NA	H31G24.4	Y119D3B.15	NA	NA	NA	NA	NA	NA	NA	NA	NA	W05F2.4	T21C12.1	F35C5.7	F33A8.10	Y7A5A.7	NA	NA	NA	NA	NA	NA	NA	NA	NA	Y19D10B.6	NA	T02E1.2	NA	NA	NA	NA	NA	NA	NA	W07A8.3	NA	NA	NA	NA	NA
C08H9.5	Y110A7A.12	NA	NA	NA	NA	NA	NA	NA	H34C03.2	Y13C8A.2	NA	NA	NA	NA	NA	NA	NA	NA	NA	W05G11.6	T21C9.11	F35C5.8	F33A8.2	Y7A9A.1	NA	NA	NA	NA	NA	NA	NA	NA	NA	Y1H11.1	NA	T02G5.11	NA	NA	NA	NA	NA	NA	NA	W07B8.3	NA	NA	NA	NA	NA
C08H9.6	Y110A7A.14	NA	NA	NA	NA	NA	NA	NA	H34I24.1	Y14H12B.2	NA	NA	NA	NA	NA	NA	NA	NA	NA	W05H5.3	T21D11.1	F35C5.9	F33A8.7	Y7A9C.7	NA	NA	NA	NA	NA	NA	NA	NA	NA	Y22D7AL.8	NA	T02G5.12	NA	NA	NA	NA	NA	NA	NA	W07E6.3	NA	NA	NA	NA	NA
C08H9.7	Y110A7A.15	NA	NA	NA	NA	NA	NA	NA	H35B03.2	Y17G7A.1	NA	NA	NA	NA	NA	NA	NA	NA	NA	W06A11.1	T21D12.11	F35C8.5	F33C8.3	Y81B9A.3	NA	NA	NA	NA	NA	NA	NA	NA	NA	Y22D7AR.11	NA	T02H6.1	NA	NA	NA	NA	NA	NA	NA	W07G1.1	NA	NA	NA	NA	NA
C09B7.1	Y111B2A.1	NA	NA	NA	NA	NA	NA	NA	H43I07.1	Y17G7B.17	NA	NA	NA	NA	NA	NA	NA	NA	NA	W06B11.1	T21E12.2	F35D11.1	F33C8.4	Y82E9BL.10	NA	NA	NA	NA	NA	NA	NA	NA	NA	Y22D7AR.5	NA	T02H6.11	NA	NA	NA	NA	NA	NA	NA	W07G1.5	NA	NA	NA	NA	NA
C09B7.2	Y111B2A.15	NA	NA	NA	NA	NA	NA	NA	JC8.10	Y17G7B.4	NA	NA	NA	NA	NA	NA	NA	NA	NA	W06B3.2	T21E8.3	F35D11.2	F33D11.3	Y82E9BL.8	NA	NA	NA	NA	NA	NA	NA	NA	NA	Y22F5A.1	NA	T03D8.1	NA	NA	NA	NA	NA	NA	NA	W07G4.1	NA	NA	NA	NA	NA
C09B8.1	Y111B2A.2	NA	NA	NA	NA	NA	NA	NA	JC8.13	Y17G9B.4	NA	NA	NA	NA	NA	NA	NA	NA	NA	W06F12.2	T21F2.1	F35D11.8	F33D11.5	Y92H12BL.5	NA	NA	NA	NA	NA	NA	NA	NA	NA	Y22F5A.3	NA	T03F1.12	NA	NA	NA	NA	NA	NA	NA	W07G4.8	NA	NA	NA	NA	NA
C09B8.3	Y111B2A.3	NA	NA	NA	NA	NA	NA	NA	K01A2.6	Y18H1A.6	NA	NA	NA	NA	NA	NA	NA	NA	NA	W06F12.3	T21F4.1	F35D2.6	F33D11.8	Y94H6A.1	NA	NA	NA	NA	NA	NA	NA	NA	NA	Y22F5A.6	NA	T03F6.2	NA	NA	NA	NA	NA	NA	NA	W07G9.2	NA	NA	NA	NA	NA
C09B8.4	Y113G7B.5	NA	NA	NA	NA	NA	NA	NA	K01C8.10	Y18H1A.7	NA	NA	NA	NA	NA	NA	NA	NA	NA	W06H8.8	T21H3.2	F35E12.10	F33D4.1	Y94H6A.10	NA	NA	NA	NA	NA	NA	NA	NA	NA	Y26G10.7	NA	T03F6.5	NA	NA	NA	NA	NA	NA	NA	W08D2.5	NA	NA	NA	NA	NA
C09B8.5	Y116A8C.27	NA	NA	NA	NA	NA	NA	NA	K01C8.3	Y19D10A.1	NA	NA	NA	NA	NA	NA	NA	NA	NA	W07A12.4	T21H3.4	F35E12.6	F33D4.3	Y94H6A.6	NA	NA	NA	NA	NA	NA	NA	NA	NA	Y2H9A.4	NA	T03G11.6	NA	NA	NA	NA	NA	NA	NA	W08E12.6	NA	NA	NA	NA	NA
C09B8.6	Y119D3B.14	NA	NA	NA	NA	NA	NA	NA	K01C8.5	Y19D10A.11	NA	NA	NA	NA	NA	NA	NA	NA	NA	W07A12.6	T21H8.4	F35E12.8	F33H12.4	Y95B8A.10	NA	NA	NA	NA	NA	NA	NA	NA	NA	Y2H9A.6	NA	T04A8.10	NA	NA	NA	NA	NA	NA	NA	W09B12.1	NA	NA	NA	NA	NA
C09B8.7	Y11D7A.7	NA	NA	NA	NA	NA	NA	NA	K01D12.6	Y19D2B.2	NA	NA	NA	NA	NA	NA	NA	NA	NA	W07E11.4	T22B11.2	F35E8.11	F34D10.5	Y95B8A.12	NA	NA	NA	NA	NA	NA	NA	NA	NA	Y32B12B.1	NA	T04A8.16	NA	NA	NA	NA	NA	NA	NA	W09C3.3	NA	NA	NA	NA	NA
C09B8.8	Y14H12B.1	NA	NA	NA	NA	NA	NA	NA	K01D12.7	Y23H5A.3	NA	NA	NA	NA	NA	NA	NA	NA	NA	W07G4.2	T22B11.4	F35E8.12	F34D6.4	Y95B8A.6	NA	NA	NA	NA	NA	NA	NA	NA	NA	Y32F6B.1	NA	T04A8.6	NA	NA	NA	NA	NA	NA	NA	W09G12.10	NA	NA	NA	NA	NA
C09B9.1	Y17G7A.1	NA	NA	NA	NA	NA	NA	NA	K01G12.3	Y24F12A.1	NA	NA	NA	NA	NA	NA	NA	NA	NA	W07G4.6	T22B7.8	F35E8.8	F34H10.1	Y97E10AL.1	NA	NA	NA	NA	NA	NA	NA	NA	NA	Y32G9A.2	NA	T04A8.8	NA	NA	NA	NA	NA	NA	NA	W09H1.1	NA	NA	NA	NA	NA
C09B9.2	Y17G7B.13	NA	NA	NA	NA	NA	NA	NA	K01G5.4	Y24F12A.2	NA	NA	NA	NA	NA	NA	NA	NA	NA	W07G9.2	T22C1.12	F35F10.11	F34H10.2	Y97E10C.1	NA	NA	NA	NA	NA	NA	NA	NA	NA	Y32G9A.4	NA	T04C12.5	NA	NA	NA	NA	NA	NA	NA	W10C4.1	NA	NA	NA	NA	NA
C09B9.3	Y17G7B.7	NA	NA	NA	NA	NA	NA	NA	K01H12.2	Y24F12A.3	NA	NA	NA	NA	NA	NA	NA	NA	NA	W08D2.1	T22C8.2	F35G2.5	F34H10.4	ZC101.1	NA	NA	NA	NA	NA	NA	NA	NA	NA	Y32G9A.5	NA	T04C4.1	NA	NA	NA	NA	NA	NA	NA	W10G11.1	NA	NA	NA	NA	NA
C09B9.4	Y17G9B.3	NA	NA	NA	NA	NA	NA	NA	K02A11.1	Y25C1A.1	NA	NA	NA	NA	NA	NA	NA	NA	NA	W09B12.1	T22F3.6	F35G8.1	F35A5.2	ZC101.2	NA	NA	NA	NA	NA	NA	NA	NA	NA	Y34F4.2	NA	T04D1.3	NA	NA	NA	NA	NA	NA	NA	W10G11.16	NA	NA	NA	NA	NA
C09B9.6	Y17G9B.4	NA	NA	NA	NA	NA	NA	NA	K02B12.5	Y25C1A.6	NA	NA	NA	NA	NA	NA	NA	NA	NA	W10C4.1	T22F3.7	F35H10.2	F35A5.3	ZC116.5	NA	NA	NA	NA	NA	NA	NA	NA	NA	Y34F4.6	NA	T04D3.1	NA	NA	NA	NA	NA	NA	NA	W10G11.17	NA	NA	NA	NA	NA
C09B9.7	Y17G9B.9	NA	NA	NA	NA	NA	NA	NA	K02B12.7	Y25C1A.7	NA	NA	NA	NA	NA	NA	NA	NA	NA	Y102A5B.3	T22F7.3	F35H10.3	F35A5.4	ZC123.3	NA	NA	NA	NA	NA	NA	NA	NA	NA	Y37A1A.2	NA	T04D3.8	NA	NA	NA	NA	NA	NA	NA	Y102A11A.2	NA	NA	NA	NA	NA
C09B9.8	Y18D10A.1	NA	NA	NA	NA	NA	NA	NA	K02B12.8	Y25C1A.8	NA	NA	NA	NA	NA	NA	NA	NA	NA	Y102A5C.17	T22F7.5	F35H12.6	F35B12.2	ZC132.8	NA	NA	NA	NA	NA	NA	NA	NA	NA	Y37B11A.1	NA	T04F8.1	NA	NA	NA	NA	NA	NA	NA	Y102A5B.3	NA	NA	NA	NA	NA
C09C7.1	Y18D10A.11	NA	NA	NA	NA	NA	NA	NA	K02B2.3	Y26E6A.1	NA	NA	NA	NA	NA	NA	NA	NA	NA	Y102A5C.21	T23B3.3	F35H8.2	F35B12.3	ZC132.9	NA	NA	NA	NA	NA	NA	NA	NA	NA	Y38C1AA.13	NA	T04H1.5	NA	NA	NA	NA	NA	NA	NA	Y102E9.5	NA	NA	NA	NA	NA
C09D1.1	Y18D10A.16	NA	NA	NA	NA	NA	NA	NA	K02B9.1	Y32F6A.1	NA	NA	NA	NA	NA	NA	NA	NA	NA	Y104H12A.1	T23D8.2	F36A4.10	F35B12.4	ZC15.1	NA	NA	NA	NA	NA	NA	NA	NA	NA	Y38C9B.1	NA	T05A6.2	NA	NA	NA	NA	NA	NA	NA	Y104H12A.1	NA	NA	NA	NA	NA
C09D1.2	Y18D10A.17	NA	NA	NA	NA	NA	NA	NA	K02B9.2	Y34D9A.6	NA	NA	NA	NA	NA	NA	NA	NA	NA	Y105C5A.23	T23E7.2	F36A4.6	F35B12.7	ZC15.3	NA	NA	NA	NA	NA	NA	NA	NA	NA	Y38E10A.10	NA	T05B11.3	NA	NA	NA	NA	NA	NA	NA	Y105E8A.7	NA	NA	NA	NA	NA
C09D4.1	Y18D10A.20	NA	NA	NA	NA	NA	NA	NA	K02C4.3	Y34D9A.7	NA	NA	NA	NA	NA	NA	NA	NA	NA	Y105C5B.25	T23F1.5	F36D1.15	F35B12.8	ZC168.5	NA	NA	NA	NA	NA	NA	NA	NA	NA	Y38E10A.29	NA	T05B9.1	NA	NA	NA	NA	NA	NA	NA	Y105E8B.1	NA	NA	NA	NA	NA
C09D4.2	Y19D10A.12	NA	NA	NA	NA	NA	NA	NA	K02D10.4	Y37D8A.10	NA	NA	NA	NA	NA	NA	NA	NA	NA	Y105E8A.12	T23F1.7	F36D1.8	F35B12.9	ZC178.1	NA	NA	NA	NA	NA	NA	NA	NA	NA	Y38F1A.8	NA	T05C12.6	NA	NA	NA	NA	NA	NA	NA	Y106G6G.6	NA	NA	NA	NA	NA
C09D4.3	Y22D7AL.10	NA	NA	NA	NA	NA	NA	NA	K02F2.1	Y37D8A.11	NA	NA	NA	NA	NA	NA	NA	NA	NA	Y105E8A.13	T23F11.3	F36D3.6	F35B3.4	ZC178.2	NA	NA	NA	NA	NA	NA	NA	NA	NA	Y39A1A.18	NA	T05C12.7	NA	NA	NA	NA	NA	NA	NA	Y106G6H.1	NA	NA	NA	NA	NA
C09D4.4	Y22D7AL.5	NA	NA	NA	NA	NA	NA	NA	K02F2.4	Y37D8A.14	NA	NA	NA	NA	NA	NA	NA	NA	NA	Y105E8A.5	T23F2.1	F36D4.4	F35C11.1	ZC196.6	NA	NA	NA	NA	NA	NA	NA	NA	NA	Y39A1A.19	NA	T05E7.3	NA	NA	NA	NA	NA	NA	NA	Y108G3AL.3	NA	NA	NA	NA	NA
C09D4.5	Y24D9A.8	NA	NA	NA	NA	NA	NA	NA	K02F3.10	Y37D8A.22	NA	NA	NA	NA	NA	NA	NA	NA	NA	Y105E8A.6	T23F2.2	F36F12.1	F35C11.3	ZC196.9	NA	NA	NA	NA	NA	NA	NA	NA	NA	Y39A3A.5	NA	T05E8.3	NA	NA	NA	NA	NA	NA	NA	Y110A2AL.8	NA	NA	NA	NA	NA
C09D4.6	Y24F12A.1	NA	NA	NA	NA	NA	NA	NA	K02F6.7	Y37D8A.25	NA	NA	NA	NA	NA	NA	NA	NA	NA	Y105E8A.7	T23F4.2	F36F2.5	F35C11.4	ZC21.2	NA	NA	NA	NA	NA	NA	NA	NA	NA	Y39A3CL.5	NA	T05F1.1	NA	NA	NA	NA	NA	NA	NA	Y111B2A.10	NA	NA	NA	NA	NA
C09D8.1	Y26E6A.1	NA	NA	NA	NA	NA	NA	NA	K03B4.1	Y37D8A.9	NA	NA	NA	NA	NA	NA	NA	NA	NA	Y105E8B.1	T23F6.5	F36G9.14	F35C11.6	ZC239.14	NA	NA	NA	NA	NA	NA	NA	NA	NA	Y39B6A.23	NA	T05F1.4	NA	NA	NA	NA	NA	NA	NA	Y111B2A.13	NA	NA	NA	NA	NA
C09E10.2	Y32B12B.4	NA	NA	NA	NA	NA	NA	NA	K03B4.2	Y37E11AL.3	NA	NA	NA	NA	NA	NA	NA	NA	NA	Y106G6G.2	T23G4.4	F36G9.9	F35C11.7	ZC239.15	NA	NA	NA	NA	NA	NA	NA	NA	NA	Y39B6A.41	NA	T05F1.6	NA	NA	NA	NA	NA	NA	NA	Y111B2A.15	NA	NA	NA	NA	NA
C09E7.10	Y32G9A.8	NA	NA	NA	NA	NA	NA	NA	K03B4.3	Y37E11AL.7	NA	NA	NA	NA	NA	NA	NA	NA	NA	Y106G6G.3	T23G5.5	F36H1.11	F35C12.2	ZC239.17	NA	NA	NA	NA	NA	NA	NA	NA	NA	Y39B6A.5	NA	T05G11.1	NA	NA	NA	NA	NA	NA	NA	Y113G7A.14	NA	NA	NA	NA	NA
C09E7.2	Y37A1B.2	NA	NA	NA	NA	NA	NA	NA	K03B8.14	Y37E11AL.9	NA	NA	NA	NA	NA	NA	NA	NA	NA	Y106G6G.4	T23H2.2	F36H12.1	F35C5.10	ZC239.3	NA	NA	NA	NA	NA	NA	NA	NA	NA	Y39D8B.1	NA	T05G5.7	NA	NA	NA	NA	NA	NA	NA	Y113G7A.5	NA	NA	NA	NA	NA
C09E7.3	Y37D8A.18	NA	NA	NA	NA	NA	NA	NA	K03D10.3	Y37E11AM.1	NA	NA	NA	NA	NA	NA	NA	NA	NA	Y106G6G.6	T23H2.4	F36H5.1	F35C5.11	ZC239.6	NA	NA	NA	NA	NA	NA	NA	NA	NA	Y39E4A.2	NA	T05G5.9	NA	NA	NA	NA	NA	NA	NA	Y116A8A.8	NA	NA	NA	NA	NA
C09E7.4	Y37D8A.21	NA	NA	NA	NA	NA	NA	NA	K03H1.13	Y37E3.10	NA	NA	NA	NA	NA	NA	NA	NA	NA	Y110A7A.3	T24A11.2	F36H9.2	F35C5.5	ZC247.1	NA	NA	NA	NA	NA	NA	NA	NA	NA	Y39E4B.3	NA	T05H10.6	NA	NA	NA	NA	NA	NA	NA	Y116A8C.28	NA	NA	NA	NA	NA
C09E7.5	Y37D8A.25	NA	NA	NA	NA	NA	NA	NA	K03H1.7	Y37E3.11	NA	NA	NA	NA	NA	NA	NA	NA	NA	Y113G7A.5	T24B8.4	F36H9.5	F35C5.6	ZC250.4	NA	NA	NA	NA	NA	NA	NA	NA	NA	Y39F10A.1	NA	T05H4.1	NA	NA	NA	NA	NA	NA	NA	Y116A8C.29	NA	NA	NA	NA	NA
C09E7.6	Y37D8A.9	NA	NA	NA	NA	NA	NA	NA	K03H4.2	Y37E3.15	NA	NA	NA	NA	NA	NA	NA	NA	NA	Y116A8C.14	T24C2.1	F37A4.3	F35C5.7	ZC262.10	NA	NA	NA	NA	NA	NA	NA	NA	NA	Y39G8C.4	NA	T05H4.11	NA	NA	NA	NA	NA	NA	NA	Y116F11B.12	NA	NA	NA	NA	NA
C09E7.7	Y37E11AM.2	NA	NA	NA	NA	NA	NA	NA	K03H6.6	Y37E3.17	NA	NA	NA	NA	NA	NA	NA	NA	NA	Y11D7A.5	T24D5.2	F37A4.7	F35C5.8	ZC262.9	NA	NA	NA	NA	NA	NA	NA	NA	NA	Y39H10B.2	NA	T06A10.3	NA	NA	NA	NA	NA	NA	NA	Y119C1B.4	NA	NA	NA	NA	NA
C09E7.8	Y37E11B.3	NA	NA	NA	NA	NA	NA	NA	K04C2.3	Y37H2A.1	NA	NA	NA	NA	NA	NA	NA	NA	NA	Y11D7A.9	T24D8.1	F37A8.1	F35C5.9	ZC317.1	NA	NA	NA	NA	NA	NA	NA	NA	NA	Y39H10B.3	NA	T06D4.1	NA	NA	NA	NA	NA	NA	NA	Y119C1B.9	NA	NA	NA	NA	NA
C09E7.9	Y37E3.17	NA	NA	NA	NA	NA	NA	NA	K04C2.6	Y37H2A.4	NA	NA	NA	NA	NA	NA	NA	NA	NA	Y12A6A.2	T24E12.6	F37A8.4	F35C8.5	ZC317.2	NA	NA	NA	NA	NA	NA	NA	NA	NA	Y40B10A.2	NA	T06D8.5	NA	NA	NA	NA	NA	NA	NA	Y11D7A.10	NA	NA	NA	NA	NA
C09E8.1	Y37E3.9	NA	NA	NA	NA	NA	NA	NA	K04D7.2	Y37H2A.5	NA	NA	NA	NA	NA	NA	NA	NA	NA	Y16B4A.2	T24F1.5	F37B1.4	F35D11.1	ZC376.7	NA	NA	NA	NA	NA	NA	NA	NA	NA	Y40C5A.3	NA	T06D8.6	NA	NA	NA	NA	NA	NA	NA	Y14H12A.2	NA	NA	NA	NA	NA
C09E8.2	Y38A10A.6	NA	NA	NA	NA	NA	NA	NA	K04F1.8	Y37H9A.6	NA	NA	NA	NA	NA	NA	NA	NA	NA	Y17G7B.1	T24F1.6	F37B4.2	F35D11.2	ZC404.5	NA	NA	NA	NA	NA	NA	NA	NA	NA	Y40C7B.3	NA	T06D8.7	NA	NA	NA	NA	NA	NA	NA	Y15E3A.3	NA	NA	NA	NA	NA
C09E8.3	Y38A8.2	NA	NA	NA	NA	NA	NA	NA	K04F10.3	Y38A8.2	NA	NA	NA	NA	NA	NA	NA	NA	NA	Y17G7B.14	T25B2.4	F37B4.7	F35E12.10	ZC416.2	NA	NA	NA	NA	NA	NA	NA	NA	NA	Y40H4A.1	NA	T06D8.8	NA	NA	NA	NA	NA	NA	NA	Y17D7B.2	NA	NA	NA	NA	NA
C09E9.1	Y38F1A.2	NA	NA	NA	NA	NA	NA	NA	K04F10.4	Y38C1AA.2	NA	NA	NA	NA	NA	NA	NA	NA	NA	Y17G9A.1	T25B6.2	F37C12.12	F35E12.6	ZC434.9	NA	NA	NA	NA	NA	NA	NA	NA	NA	Y41D4A.2	NA	T06D8.9	NA	NA	NA	NA	NA	NA	NA	Y17G7B.15	NA	NA	NA	NA	NA
C09F12.1	Y38H8A.7	NA	NA	NA	NA	NA	NA	NA	K04F10.6	Y38C9A.2	NA	NA	NA	NA	NA	NA	NA	NA	NA	Y18H1A.11	T25B9.10	F37C12.4	F35E12.8	ZC443.7	NA	NA	NA	NA	NA	NA	NA	NA	NA	Y41D4A.7	NA	T06G6.9	NA	NA	NA	NA	NA	NA	NA	Y18D10A.6	NA	NA	NA	NA	NA
C09F12.2	Y39A1A.12	NA	NA	NA	NA	NA	NA	NA	K04G2.1	Y38C9B.2	NA	NA	NA	NA	NA	NA	NA	NA	NA	Y18H1A.14	T25C12.1	F37D6.6	F35E12.9	ZC449.8	NA	NA	NA	NA	NA	NA	NA	NA	NA	Y41D4A.8	NA	T07A5.2	NA	NA	NA	NA	NA	NA	NA	Y18D10A.7	NA	NA	NA	NA	NA
C09F12.3	Y39A1A.22	NA	NA	NA	NA	NA	NA	NA	K04G2.6	Y38E10A.14	NA	NA	NA	NA	NA	NA	NA	NA	NA	Y18H1A.9	T25C12.3	F38A1.13	F35E8.12	ZC455.1	NA	NA	NA	NA	NA	NA	NA	NA	NA	Y41D4B.1	NA	T07A9.13	NA	NA	NA	NA	NA	NA	NA	Y18D10A.8	NA	NA	NA	NA	NA
C09F5.1	Y39A1A.23	NA	NA	NA	NA	NA	NA	NA	K05C4.1	Y38E10A.22	NA	NA	NA	NA	NA	NA	NA	NA	NA	Y19D10B.6	T25E12.4	F38A1.5	F35E8.8	ZC455.7	NA	NA	NA	NA	NA	NA	NA	NA	NA	Y41D4B.20	NA	T07A9.5	NA	NA	NA	NA	NA	NA	NA	Y19D10B.3	NA	NA	NA	NA	NA
C09F5.2	Y39A1A.7	NA	NA	NA	NA	NA	NA	NA	K05C4.6	Y38E10A.23	NA	NA	NA	NA	NA	NA	NA	NA	NA	Y20F4.4	T25E12.8	F38A3.2	F35G2.5	ZC477.9	NA	NA	NA	NA	NA	NA	NA	NA	NA	Y41D4B.8	NA	T07A9.6	NA	NA	NA	NA	NA	NA	NA	Y1H11.2	NA	NA	NA	NA	NA
C09F5.3	Y39A3CL.1	NA	NA	NA	NA	NA	NA	NA	K05C4.7	Y38E10A.3	NA	NA	NA	NA	NA	NA	NA	NA	NA	Y22F5A.5	T25E4.2	F38A5.10	F35G8.1	ZC64.3	NA	NA	NA	NA	NA	NA	NA	NA	NA	Y41E3.12	NA	T07C12.14	NA	NA	NA	NA	NA	NA	NA	Y20F4.2	NA	NA	NA	NA	NA
C09F9.1	Y39A3CL.3	NA	NA	NA	NA	NA	NA	NA	K06A5.2	Y38E10A.6	NA	NA	NA	NA	NA	NA	NA	NA	NA	Y23H5A.5	T25F10.1	F38A5.3	F35H10.3	ZC8.4	NA	NA	NA	NA	NA	NA	NA	NA	NA	Y41E3.15	NA	T07C4.11	NA	NA	NA	NA	NA	NA	NA	Y20F4.3	NA	NA	NA	NA	NA
C09F9.2	Y39B6A.16	NA	NA	NA	NA	NA	NA	NA	K06A5.6	Y38F2AR.1	NA	NA	NA	NA	NA	NA	NA	NA	NA	Y32G9A.11	T25F10.2	F38A6.4	F35H12.6	ZK1037.6	NA	NA	NA	NA	NA	NA	NA	NA	NA	Y41G9A.10	NA	T07C4.12	NA	NA	NA	NA	NA	NA	NA	Y22D7AR.6	NA	NA	NA	NA	NA
C09F9.3	Y39B6A.39	NA	NA	NA	NA	NA	NA	NA	K06A5.7	Y38F2AR.7	NA	NA	NA	NA	NA	NA	NA	NA	NA	Y32G9B.1	T25F10.3	F38A6.5	F35H12.7	ZK1053.5	NA	NA	NA	NA	NA	NA	NA	NA	NA	Y41G9A.5	NA	T07C4.3	NA	NA	NA	NA	NA	NA	NA	Y24D9A.1	NA	NA	NA	NA	NA
C09G1.3	Y39B6A.42	NA	NA	NA	NA	NA	NA	NA	K06B9.2	Y38H8A.7	NA	NA	NA	NA	NA	NA	NA	NA	NA	Y32H12A.1	T25G12.6	F38B2.1	F35H8.2	ZK1055.3	NA	NA	NA	NA	NA	NA	NA	NA	NA	Y42A5A.3	NA	T07C4.6	NA	NA	NA	NA	NA	NA	NA	Y24D9A.5	NA	NA	NA	NA	NA
C09G1.4	Y39B6A.46	NA	NA	NA	NA	NA	NA	NA	K06H7.4	Y39A1A.1	NA	NA	NA	NA	NA	NA	NA	NA	NA	Y34B4A.4	T26C12.4	F38B2.2	F36A2.3	ZK1067.7	NA	NA	NA	NA	NA	NA	NA	NA	NA	Y42H9AR.5	NA	T07C4.7	NA	NA	NA	NA	NA	NA	NA	Y2C2A.1	NA	NA	NA	NA	NA
C09G1.5	Y39C12A.8	NA	NA	NA	NA	NA	NA	NA	K06H7.6	Y39A1A.11	NA	NA	NA	NA	NA	NA	NA	NA	NA	Y34B4A.6	T26E4.3	F38B6.1	F36A2.9	ZK1151.1	NA	NA	NA	NA	NA	NA	NA	NA	NA	Y43C5A.7	NA	T07D3.9	NA	NA	NA	NA	NA	NA	NA	Y32G9A.6	NA	NA	NA	NA	NA
C09G12.1	Y39E4A.3	NA	NA	NA	NA	NA	NA	NA	K06H7.7	Y39A1A.22	NA	NA	NA	NA	NA	NA	NA	NA	NA	Y34B4A.8	T26F2.1	F38B6.5	F36A4.10	ZK1193.5	NA	NA	NA	NA	NA	NA	NA	NA	NA	Y43E12A.2	NA	T07D4.5	NA	NA	NA	NA	NA	NA	NA	Y34B4A.10	NA	NA	NA	NA	NA
C09G12.17	Y39E4B.12	NA	NA	NA	NA	NA	NA	NA	K06H7.9	Y39A1C.4	NA	NA	NA	NA	NA	NA	NA	NA	NA	Y36E3A.1	T26H10.1	F38B6.7	F36D1.15	ZK1248.4	NA	NA	NA	NA	NA	NA	NA	NA	NA	Y43F8A.1	NA	T07E3.5	NA	NA	NA	NA	NA	NA	NA	Y34B4A.4	NA	NA	NA	NA	NA
C09G12.5	Y39E4B.2	NA	NA	NA	NA	NA	NA	NA	K07A1.1	Y39A3CL.3	NA	NA	NA	NA	NA	NA	NA	NA	NA	Y37A1A.4	T26H2.7	F38B7.1	F36D1.8	ZK1290.11	NA	NA	NA	NA	NA	NA	NA	NA	NA	Y43F8B.1	NA	T07F8.3	NA	NA	NA	NA	NA	NA	NA	Y34D9A.6	NA	NA	NA	NA	NA
C09G12.8	Y39E4B.5	NA	NA	NA	NA	NA	NA	NA	K07A1.17	Y39A3CL.7	NA	NA	NA	NA	NA	NA	NA	NA	NA	Y37A1B.11	T26H5.8	F38B7.10	F36D3.2	ZK1307.4	NA	NA	NA	NA	NA	NA	NA	NA	NA	Y43F8B.11	NA	T07G12.10	NA	NA	NA	NA	NA	NA	NA	Y34D9A.8	NA	NA	NA	NA	NA
C09G12.9	Y39E4B.7	NA	NA	NA	NA	NA	NA	NA	K07A1.2	Y39A3CR.1	NA	NA	NA	NA	NA	NA	NA	NA	NA	Y38A10A.2	T27A1.4	F38B7.2	F36D4.4	ZK131.11	NA	NA	NA	NA	NA	NA	NA	NA	NA	Y43F8B.5	NA	T07G12.12	NA	NA	NA	NA	NA	NA	NA	Y37A1A.4	NA	NA	NA	NA	NA
C09G4.1	Y39F10B.1	NA	NA	NA	NA	NA	NA	NA	K07A1.8	Y39A3CR.7	NA	NA	NA	NA	NA	NA	NA	NA	NA	Y38C1AA.5	T27A10.2	F38C2.4	F36G3.1	ZK1321.4	NA	NA	NA	NA	NA	NA	NA	NA	NA	Y44A6D.7	NA	T07G12.6	NA	NA	NA	NA	NA	NA	NA	Y37A1B.15	NA	NA	NA	NA	NA
C09G4.2	Y39G10AR.2	NA	NA	NA	NA	NA	NA	NA	K07A12.1	Y39B6A.10	NA	NA	NA	NA	NA	NA	NA	NA	NA	Y38E10A.4	T27B1.1	F38E1.5	F36G3.3	ZK180.1	NA	NA	NA	NA	NA	NA	NA	NA	NA	Y45F10A.3	NA	T07H6.2	NA	NA	NA	NA	NA	NA	NA	Y37D8A.23	NA	NA	NA	NA	NA
C09G4.3	Y39G10AR.7	NA	NA	NA	NA	NA	NA	NA	K07A12.2	Y39B6A.13	NA	NA	NA	NA	NA	NA	NA	NA	NA	Y38F1A.4	T27C4.1	F38E11.1	F36G9.14	ZK185.1	NA	NA	NA	NA	NA	NA	NA	NA	NA	Y45F10D.2	NA	T08A11.1	NA	NA	NA	NA	NA	NA	NA	Y38C1AB.4	NA	NA	NA	NA	NA
C09G4.4	Y39G10AR.8	NA	NA	NA	NA	NA	NA	NA	K07A12.3	Y39B6A.36	NA	NA	NA	NA	NA	NA	NA	NA	NA	Y38F1A.6	T27C4.2	F38E11.12	F36G9.9	ZK218.4	NA	NA	NA	NA	NA	NA	NA	NA	NA	Y45F10D.6	NA	T08D10.2	NA	NA	NA	NA	NA	NA	NA	Y38C1BA.2	NA	NA	NA	NA	NA
C09G4.5	Y39G10AR.9	NA	NA	NA	NA	NA	NA	NA	K07A12.4	Y39B6A.37	NA	NA	NA	NA	NA	NA	NA	NA	NA	Y38F2AL.2	T27C4.3	F38E11.2	F36H1.11	ZK228.8	NA	NA	NA	NA	NA	NA	NA	NA	NA	Y45G12C.12	NA	T08D2.6	NA	NA	NA	NA	NA	NA	NA	Y38E10A.11	NA	NA	NA	NA	NA
C09G5.1	Y39H10A.3	NA	NA	NA	NA	NA	NA	NA	K07B1.3	Y39B6A.42	NA	NA	NA	NA	NA	NA	NA	NA	NA	Y38H6C.20	T27C5.1	F38E11.4	F36H12.1	ZK262.2	NA	NA	NA	NA	NA	NA	NA	NA	NA	Y46E12A.1	NA	T08G5.5	NA	NA	NA	NA	NA	NA	NA	Y38F1A.2	NA	NA	NA	NA	NA
C09G5.2	Y40B10A.1	NA	NA	NA	NA	NA	NA	NA	K07C11.2	Y39E4A.2	NA	NA	NA	NA	NA	NA	NA	NA	NA	Y39A1B.2	T27C5.12	F38E11.7	F36H5.1	ZK270.1	NA	NA	NA	NA	NA	NA	NA	NA	NA	Y46E12A.5	NA	T09A12.5	NA	NA	NA	NA	NA	NA	NA	Y38F1A.3	NA	NA	NA	NA	NA
C09G5.3	Y40B1A.1	NA	NA	NA	NA	NA	NA	NA	K07C5.6	Y39E4A.3	NA	NA	NA	NA	NA	NA	NA	NA	NA	Y39B6A.7	T27C5.8	F38E9.6	F36H9.2	ZK287.3	NA	NA	NA	NA	NA	NA	NA	NA	NA	Y46E12BL.1	NA	T09A5.7	NA	NA	NA	NA	NA	NA	NA	Y38F1A.4	NA	NA	NA	NA	NA
C09G5.4	Y40B1B.8	NA	NA	NA	NA	NA	NA	NA	K07D4.3	Y39E4B.1	NA	NA	NA	NA	NA	NA	NA	NA	NA	Y39E4B.12	T27D12.3	F38G1.3	F36H9.5	ZK328.6	NA	NA	NA	NA	NA	NA	NA	NA	NA	Y46E12BL.4	NA	T09A5.8	NA	NA	NA	NA	NA	NA	NA	Y38F2AL.3	NA	NA	NA	NA	NA
C09G5.5	Y41D4A.4	NA	NA	NA	NA	NA	NA	NA	K07E8.7	Y39E4B.10	NA	NA	NA	NA	NA	NA	NA	NA	NA	Y39E4B.3	T27E4.5	F38H4.3	F37A4.3	ZK337.1	NA	NA	NA	NA	NA	NA	NA	NA	NA	Y46H3D.6	NA	T09A5.9	NA	NA	NA	NA	NA	NA	NA	Y38H6A.3	NA	NA	NA	NA	NA
C09G5.6	Y41D4A.5	NA	NA	NA	NA	NA	NA	NA	K07F5.12	Y39E4B.7	NA	NA	NA	NA	NA	NA	NA	NA	NA	Y39H10A.4	T27E9.9	F39B3.3	F37A4.7	ZK354.7	NA	NA	NA	NA	NA	NA	NA	NA	NA	Y47G6A.19	NA	T09B4.1	NA	NA	NA	NA	NA	NA	NA	Y38H6C.20	NA	NA	NA	NA	NA
C09G5.7	Y41D4B.13	NA	NA	NA	NA	NA	NA	NA	K07G5.1	Y39F10B.1	NA	NA	NA	NA	NA	NA	NA	NA	NA	Y40H7A.4	T27F2.2	F39C12.4	F37A8.4	ZK355.1	NA	NA	NA	NA	NA	NA	NA	NA	NA	Y47G7B.2	NA	T09B4.10	NA	NA	NA	NA	NA	NA	NA	Y38H6C.24	NA	NA	NA	NA	NA
C09G5.8	Y41E3.1	NA	NA	NA	NA	NA	NA	NA	K07G5.6	Y39G10AR.14	NA	NA	NA	NA	NA	NA	NA	NA	NA	Y40H7A.5	T28A11.2	F39D8.3	F37A8.5	ZK355.2	NA	NA	NA	NA	NA	NA	NA	NA	NA	Y47H10A.3	NA	T09B4.2	NA	NA	NA	NA	NA	NA	NA	Y38H6C.3	NA	NA	NA	NA	NA
C09G9.1	Y41E3.7	NA	NA	NA	NA	NA	NA	NA	K07H8.1	Y39G10AR.7	NA	NA	NA	NA	NA	NA	NA	NA	NA	Y41C4A.13	T28A8.1	F39D8.4	F37B1.1	ZK355.5	NA	NA	NA	NA	NA	NA	NA	NA	NA	Y47H10A.4	NA	T09B9.1	NA	NA	NA	NA	NA	NA	NA	Y39A3CL.2	NA	NA	NA	NA	NA
C09G9.2	Y42G9A.6	NA	NA	NA	NA	NA	NA	NA	K07H8.2	Y39G10AR.8	NA	NA	NA	NA	NA	NA	NA	NA	NA	Y41D4B.16	T28B4.1	F39G3.8	F37B1.3	ZK370.4	NA	NA	NA	NA	NA	NA	NA	NA	NA	Y48C3A.3	NA	T09B9.4	NA	NA	NA	NA	NA	NA	NA	Y39A3CR.5	NA	NA	NA	NA	NA
C09G9.3	Y43D4A.3	NA	NA	NA	NA	NA	NA	NA	K08A8.1	Y39H10A.2	NA	NA	NA	NA	NA	NA	NA	NA	NA	Y41D4B.17	T28C6.1	F39H12.2	F37B1.4	ZK39.4	NA	NA	NA	NA	NA	NA	NA	NA	NA	Y48E1B.9	NA	T09E8.2	NA	NA	NA	NA	NA	NA	NA	Y39A3CR.6	NA	NA	NA	NA	NA
C09G9.4	Y43D4A.4	NA	NA	NA	NA	NA	NA	NA	K08B4.1	Y39H10A.3	NA	NA	NA	NA	NA	NA	NA	NA	NA	Y41E3.3	T28D6.2	F39H12.3	F37B4.2	ZK39.6	NA	NA	NA	NA	NA	NA	NA	NA	NA	Y48G10A.6	NA	T09E8.3	NA	NA	NA	NA	NA	NA	NA	Y39B6A.17	NA	NA	NA	NA	NA
C09G9.5	Y43E12A.1	NA	NA	NA	NA	NA	NA	NA	K08C9.2	Y40B1B.5	NA	NA	NA	NA	NA	NA	NA	NA	NA	Y41G9A.1	T28D9.7	F39H2.1	F37B4.7	ZK430.8	NA	NA	NA	NA	NA	NA	NA	NA	NA	Y49C4A.8	NA	T09F3.3	NA	NA	NA	NA	NA	NA	NA	Y39B6A.48	NA	NA	NA	NA	NA
C09G9.6	Y43E12A.3	NA	NA	NA	NA	NA	NA	NA	K08D10.12	Y40B1B.8	NA	NA	NA	NA	NA	NA	NA	NA	NA	Y41G9A.2	T28F2.3	F40A3.4	F37C12.12	ZK455.2	NA	NA	NA	NA	NA	NA	NA	NA	NA	Y49E10.20	NA	T09F3.4	NA	NA	NA	NA	NA	NA	NA	Y39B6A.8	NA	NA	NA	NA	NA
C09G9.7	Y43F8C.12	NA	NA	NA	NA	NA	NA	NA	K08D10.13	Y40G12A.1	NA	NA	NA	NA	NA	NA	NA	NA	NA	Y41G9A.4	T28F2.7	F40E10.3	F37C12.4	ZK488.1	NA	NA	NA	NA	NA	NA	NA	NA	NA	Y49F6B.12	NA	T09F3.5	NA	NA	NA	NA	NA	NA	NA	Y39C12A.1	NA	NA	NA	NA	NA
C09H10.1	Y43F8C.14	NA	NA	NA	NA	NA	NA	NA	K08D12.1	Y41D4A.6	NA	NA	NA	NA	NA	NA	NA	NA	NA	Y42G9A.3	T28F3.5	F40E10.5	F37D6.6	ZK524.2	NA	NA	NA	NA	NA	NA	NA	NA	NA	Y4C6A.2	NA	T10B11.7	NA	NA	NA	NA	NA	NA	NA	Y39E4B.4	NA	NA	NA	NA	NA
C09H10.10	Y44E3A.4	NA	NA	NA	NA	NA	NA	NA	K08D9.3	Y41D4B.13	NA	NA	NA	NA	NA	NA	NA	NA	NA	Y43B11AR.1	T28F3.8	F40E3.6	F37H8.3	ZK54.2	NA	NA	NA	NA	NA	NA	NA	NA	NA	Y4C6B.3	NA	T10B11.8	NA	NA	NA	NA	NA	NA	NA	Y39E4B.8	NA	NA	NA	NA	NA
C09H10.2	Y44E3B.1	NA	NA	NA	NA	NA	NA	NA	K08E3.3	Y41D4B.19	NA	NA	NA	NA	NA	NA	NA	NA	NA	Y43B11AR.4	T28H11.8	F40F12.1	F38A1.13	ZK593.2	NA	NA	NA	NA	NA	NA	NA	NA	NA	Y4C6B.4	NA	T10C6.10	NA	NA	NA	NA	NA	NA	NA	Y39G10AR.3	NA	NA	NA	NA	NA
C09H10.3	Y45F10A.2	NA	NA	NA	NA	NA	NA	NA	K08E3.4	Y41E3.10	NA	NA	NA	NA	NA	NA	NA	NA	NA	Y43D4A.5	VC5.3	F40F4.8	F38A1.5	ZK596.1	NA	NA	NA	NA	NA	NA	NA	NA	NA	Y4C6B.5	NA	T10C6.5	NA	NA	NA	NA	NA	NA	NA	Y40C5A.2	NA	NA	NA	NA	NA
C09H10.5	Y45F10A.4	NA	NA	NA	NA	NA	NA	NA	K08E3.5	Y41E3.11	NA	NA	NA	NA	NA	NA	NA	NA	NA	Y43F4A.4	VW02B12L.1	F40F8.4	F38A3.2	ZK6.2	NA	NA	NA	NA	NA	NA	NA	NA	NA	Y4C6B.7	NA	T10E9.1	NA	NA	NA	NA	NA	NA	NA	Y40H7A.5	NA	NA	NA	NA	NA
C09H10.6	Y45F10C.3	NA	NA	NA	NA	NA	NA	NA	K08E3.7	Y41E3.4	NA	NA	NA	NA	NA	NA	NA	NA	NA	Y43F8A.3	W02B3.2	F40F8.5	F38A5.10	ZK6.8	NA	NA	NA	NA	NA	NA	NA	NA	NA	Y50C1A.2	NA	T10E9.2	NA	NA	NA	NA	NA	NA	NA	Y40H7A.8	NA	NA	NA	NA	NA
C09H10.7	Y45F10D.3	NA	NA	NA	NA	NA	NA	NA	K08E4.2	Y41E3.9	NA	NA	NA	NA	NA	NA	NA	NA	NA	Y43F8B.14	W02B8.3	F40F8.8	F38A5.14	ZK632.9	NA	NA	NA	NA	NA	NA	NA	NA	NA	Y50D4A.3	NA	T10E9.7	NA	NA	NA	NA	NA	NA	NA	Y41C4A.12	NA	NA	NA	NA	NA
C09H10.8	Y45F10D.4	NA	NA	NA	NA	NA	NA	NA	K08E4.3	Y42A5A.5	NA	NA	NA	NA	NA	NA	NA	NA	NA	Y44A6E.1	W02D7.3	F40F9.10	F38A5.3	ZK669.4	NA	NA	NA	NA	NA	NA	NA	NA	NA	Y50E8A.7	NA	T10F2.3	NA	NA	NA	NA	NA	NA	NA	Y41C4A.22	NA	NA	NA	NA	NA
C09H10.9	Y45F10D.9	NA	NA	NA	NA	NA	NA	NA	K08E4.6	Y43C5A.1	NA	NA	NA	NA	NA	NA	NA	NA	NA	Y44E3A.2	W02G9.2	F40F9.9	F38A5.9	ZK673.11	NA	NA	NA	NA	NA	NA	NA	NA	NA	Y51A2A.12	NA	T10G3.6	NA	NA	NA	NA	NA	NA	NA	Y41D4B.9	NA	NA	NA	NA	NA
C09H5.2	Y45F3A.9	NA	NA	NA	NA	NA	NA	NA	K08E7.1	Y43C5A.6	NA	NA	NA	NA	NA	NA	NA	NA	NA	Y45F10B.13	W03A5.7	F40G12.6	F38A6.4	ZK673.13	NA	NA	NA	NA	NA	NA	NA	NA	NA	Y51A2A.4	NA	T10H9.4	NA	NA	NA	NA	NA	NA	NA	Y41E3.3	NA	NA	NA	NA	NA
C09H5.4	Y45G12B.3	NA	NA	NA	NA	NA	NA	NA	K08E7.2	Y43D4A.6	NA	NA	NA	NA	NA	NA	NA	NA	NA	Y45F10D.13	W03C9.4	F40H3.3	F38A6.5	ZK673.2	NA	NA	NA	NA	NA	NA	NA	NA	NA	Y51A2D.11	NA	T11F8.1	NA	NA	NA	NA	NA	NA	NA	Y41E3.6	NA	NA	NA	NA	NA
C09H5.5	Y45G12C.16	NA	NA	NA	NA	NA	NA	NA	K08E7.3	Y43F11A.1	NA	NA	NA	NA	NA	NA	NA	NA	NA	Y45F3A.8	W03C9.6	F41B5.10	F38B2.1	ZK675.1	NA	NA	NA	NA	NA	NA	NA	NA	NA	Y51A2D.18	NA	T11G6.5	NA	NA	NA	NA	NA	NA	NA	Y41G9A.4	NA	NA	NA	NA	NA
C09H5.6	Y45G5AL.1	NA	NA	NA	NA	NA	NA	NA	K08F11.5	Y43F11A.4	NA	NA	NA	NA	NA	NA	NA	NA	NA	Y45F3A.9	W03D8.11	F41B5.2	F38B2.2	ZK688.10	NA	NA	NA	NA	NA	NA	NA	NA	NA	Y51B9A.8	NA	T12A2.7	NA	NA	NA	NA	NA	NA	NA	Y42A5A.2	NA	NA	NA	NA	NA
C09H5.7	Y45G5AM.2	NA	NA	NA	NA	NA	NA	NA	K08F4.3	Y43F11A.5	NA	NA	NA	NA	NA	NA	NA	NA	NA	Y45G12A.1	W03F11.2	F41C3.2	F38B2.6	ZK75.1	NA	NA	NA	NA	NA	NA	NA	NA	NA	Y51B9A.9	NA	T12A2.8	NA	NA	NA	NA	NA	NA	NA	Y42A5A.4	NA	NA	NA	NA	NA
C09H5.9	Y45G5AM.9	NA	NA	NA	NA	NA	NA	NA	K08F4.9	Y43F4B.3	NA	NA	NA	NA	NA	NA	NA	NA	NA	Y45G12C.1	W03F8.1	F41C6.5	F38B6.1	ZK829.4	NA	NA	NA	NA	NA	NA	NA	NA	NA	Y51H4A.17	NA	T12C9.7	NA	NA	NA	NA	NA	NA	NA	Y42G9A.1	NA	NA	NA	NA	NA
C09H6.1	Y46E12BL.3	NA	NA	NA	NA	NA	NA	NA	K08F9.2	Y43F4B.4	NA	NA	NA	NA	NA	NA	NA	NA	NA	Y46C8AL.5	W03F8.9	F41E6.17	F38B6.2	ZK84.7	NA	NA	NA	NA	NA	NA	NA	NA	NA	Y51H7BR.4	NA	T12D8.3	NA	NA	NA	NA	NA	NA	NA	Y42G9A.4	NA	NA	NA	NA	NA
C09H6.2	Y46G5A.12	NA	NA	NA	NA	NA	NA	NA	K08F9.4	Y43F8C.12	NA	NA	NA	NA	NA	NA	NA	NA	NA	Y46C8AL.9	W03G9.7	F41E6.2	F38B6.5	ZK849.1	NA	NA	NA	NA	NA	NA	NA	NA	NA	Y51H7BR.7	NA	T12D8.7	NA	NA	NA	NA	NA	NA	NA	Y43F8B.13	NA	NA	NA	NA	NA
C09H6.3	Y46G5A.31	NA	NA	NA	NA	NA	NA	NA	K08H10.1	Y43H11AL.1	NA	NA	NA	NA	NA	NA	NA	NA	NA	Y46E12BR.1	W04E12.8	F41E7.1	F38B6.7	ZK849.2	NA	NA	NA	NA	NA	NA	NA	NA	NA	Y53C12A.2	NA	T12D8.8	NA	NA	NA	NA	NA	NA	NA	Y43F8B.3	NA	NA	NA	NA	NA
C10A4.10	Y46G5A.5	NA	NA	NA	NA	NA	NA	NA	K08H10.4	Y44A6C.2	NA	NA	NA	NA	NA	NA	NA	NA	NA	Y46G5A.10	W04G3.13	F41E7.3	F38B7.1	ZK858.1	NA	NA	NA	NA	NA	NA	NA	NA	NA	Y53F4B.1	NA	T12E12.4	NA	NA	NA	NA	NA	NA	NA	Y43F8C.3	NA	NA	NA	NA	NA
C10A4.3	Y46H3A.6	NA	NA	NA	NA	NA	NA	NA	K08H2.3	Y45F10C.6	NA	NA	NA	NA	NA	NA	NA	NA	NA	Y46G5A.22	W04G3.4	F41E7.5	F38B7.2	ZK863.8	NA	NA	NA	NA	NA	NA	NA	NA	NA	Y53F4B.35	NA	T12F5.1	NA	NA	NA	NA	NA	NA	NA	Y43F8C.4	NA	NA	NA	NA	NA
C10A4.4	Y47D3A.6	NA	NA	NA	NA	NA	NA	NA	K09E3.7	Y45F10D.9	NA	NA	NA	NA	NA	NA	NA	NA	NA	Y46G5A.26	W04G5.5	F41E7.8	F38C2.4	ZK896.8	NA	NA	NA	NA	NA	NA	NA	NA	NA	Y53F4B.51	NA	T12F5.5	NA	NA	NA	NA	NA	NA	NA	Y44A6D.3	NA	NA	NA	NA	NA
C10A4.5	Y47D7A.14	NA	NA	NA	NA	NA	NA	NA	K09E4.3	Y45F3A.3	NA	NA	NA	NA	NA	NA	NA	NA	NA	Y46G5A.29	W04G5.8	F41E7.9	F38E1.5	ZK897.1	NA	NA	NA	NA	NA	NA	NA	NA	NA	Y53G8AR.7	NA	T12G3.5	NA	NA	NA	NA	NA	NA	NA	Y44A6D.4	NA	NA	NA	NA	NA
C10A4.8	Y47G6A.1	NA	NA	NA	NA	NA	NA	NA	K09H11.3	Y45F3A.9	NA	NA	NA	NA	NA	NA	NA	NA	NA	Y47D3B.12	W04G5.9	F41F3.3	F38E11.1	ZK909.6	NA	NA	NA	NA	NA	NA	NA	NA	NA	Y54E5A.8	NA	T12G3.6	NA	NA	NA	NA	NA	NA	NA	Y44A6E.1	NA	NA	NA	NA	NA
C10A4.9	Y47G6A.11	NA	NA	NA	NA	NA	NA	NA	K10B2.3	Y45G12B.1	NA	NA	NA	NA	NA	NA	NA	NA	NA	Y47D3B.5	W05B2.4	F41F3.8	F38E11.13	ZK945.1	NA	NA	NA	NA	NA	NA	NA	NA	NA	Y54G11A.13	NA	T12G3.7	NA	NA	NA	NA	NA	NA	NA	Y45F10B.10	NA	NA	NA	NA	NA
C10B5.1	Y47G6A.2	NA	NA	NA	NA	NA	NA	NA	K10B2.5	Y45G12C.10	NA	NA	NA	NA	NA	NA	NA	NA	NA	Y47G6A.17	W05B2.7	F41G3.10	F38E11.2	NA	NA	NA	NA	NA	NA	NA	NA	NA	NA	Y54G11A.5	NA	T13C2.4	NA	NA	NA	NA	NA	NA	NA	Y45F10B.13	NA	NA	NA	NA	NA
C10B5.3	Y47G6A.22	NA	NA	NA	NA	NA	NA	NA	K10C3.2	Y45G5AL.1	NA	NA	NA	NA	NA	NA	NA	NA	NA	Y47G6A.18	W05F2.4	F41G3.16	F38E11.7	NA	NA	NA	NA	NA	NA	NA	NA	NA	NA	Y54G2A.11	NA	T13C2.6	NA	NA	NA	NA	NA	NA	NA	Y45F10D.13	NA	NA	NA	NA	NA
C10C5.1	Y47G6A.25	NA	NA	NA	NA	NA	NA	NA	K10C8.1	Y45G5AM.8	NA	NA	NA	NA	NA	NA	NA	NA	NA	Y47G7B.2	W05G11.5	F41G3.18	F38E9.6	NA	NA	NA	NA	NA	NA	NA	NA	NA	NA	Y54G2A.57	NA	T13F2.2	NA	NA	NA	NA	NA	NA	NA	Y45F10D.14	NA	NA	NA	NA	NA
C10C5.2	Y47G7B.2	NA	NA	NA	NA	NA	NA	NA	K10C8.3	Y46G5A.12	NA	NA	NA	NA	NA	NA	NA	NA	NA	Y48B6A.8	W05G11.6	F41G3.21	F38H4.3	NA	NA	NA	NA	NA	NA	NA	NA	NA	NA	Y54G9A.4	NA	T13F2.7	NA	NA	NA	NA	NA	NA	NA	Y45G12B.3	NA	NA	NA	NA	NA
C10C5.3	Y47H9C.7	NA	NA	NA	NA	NA	NA	NA	K10D2.2	Y46G5A.13	NA	NA	NA	NA	NA	NA	NA	NA	NA	Y48C3A.5	W06A11.1	F41G3.5	F39C12.2	NA	NA	NA	NA	NA	NA	NA	NA	NA	NA	Y55B1BL.1	NA	T13H5.8	NA	NA	NA	NA	NA	NA	NA	Y46E12BR.1	NA	NA	NA	NA	NA
C10C5.4	Y48A5A.1	NA	NA	NA	NA	NA	NA	NA	K10D2.3	Y46G5A.27	NA	NA	NA	NA	NA	NA	NA	NA	NA	Y48D7A.2	W06B11.1	F42A10.6	F39C12.4	NA	NA	NA	NA	NA	NA	NA	NA	NA	NA	Y55B1BR.5	NA	T14B4.2	NA	NA	NA	NA	NA	NA	NA	Y47D3A.2	NA	NA	NA	NA	NA
C10C5.5	Y48A6B.10	NA	NA	NA	NA	NA	NA	NA	K10D3.3	Y46G5A.28	NA	NA	NA	NA	NA	NA	NA	NA	NA	Y48G8AR.1	W06D12.1	F42A10.7	F39D8.1	NA	NA	NA	NA	NA	NA	NA	NA	NA	NA	Y55F3AM.14	NA	T14B4.3	NA	NA	NA	NA	NA	NA	NA	Y47D3B.6	NA	NA	NA	NA	NA
C10C5.6	Y48A6B.13	NA	NA	NA	NA	NA	NA	NA	K10H10.1	Y46G5A.30	NA	NA	NA	NA	NA	NA	NA	NA	NA	Y48G9A.9	W06D12.2	F42A8.1	F39D8.3	NA	NA	NA	NA	NA	NA	NA	NA	NA	NA	Y55F3BR.6	NA	T14G10.3	NA	NA	NA	NA	NA	NA	NA	Y47D7A.13	NA	NA	NA	NA	NA
C10C5.7	Y48B6A.13	NA	NA	NA	NA	NA	NA	NA	K11D12.2	Y46G5A.34	NA	NA	NA	NA	NA	NA	NA	NA	NA	Y49A3A.2	W06F12.2	F42C5.3	F39D8.4	NA	NA	NA	NA	NA	NA	NA	NA	NA	NA	Y55F3C.3	NA	T14G10.6	NA	NA	NA	NA	NA	NA	NA	Y47D7A.5	NA	NA	NA	NA	NA
C10C6.1	Y48C3A.17	NA	NA	NA	NA	NA	NA	NA	K11D12.5	Y46H3A.4	NA	NA	NA	NA	NA	NA	NA	NA	NA	Y49C4A.5	W06G6.1	F42C5.4	F39G3.8	NA	NA	NA	NA	NA	NA	NA	NA	NA	NA	Y57A10B.1	NA	T14G10.7	NA	NA	NA	NA	NA	NA	NA	Y47H9C.2	NA	NA	NA	NA	NA
C10C6.2	Y48E1B.1	NA	NA	NA	NA	NA	NA	NA	K11D2.4	Y47D3A.12	NA	NA	NA	NA	NA	NA	NA	NA	NA	Y51A2D.18	W07A12.4	F42C5.6	F39H12.2	NA	NA	NA	NA	NA	NA	NA	NA	NA	NA	Y57A10B.2	NA	T15H9.2	NA	NA	NA	NA	NA	NA	NA	Y48A6B.1	NA	NA	NA	NA	NA
C10C6.3	Y48E1C.2	NA	NA	NA	NA	NA	NA	NA	K11D9.1	Y47D3A.17	NA	NA	NA	NA	NA	NA	NA	NA	NA	Y51A2D.19	W07G1.1	F42D1.3	F39H2.1	NA	NA	NA	NA	NA	NA	NA	NA	NA	NA	Y57E12B.1	NA	T16G12.6	NA	NA	NA	NA	NA	NA	NA	Y48A6B.14	NA	NA	NA	NA	NA
C10C6.5	Y48G10A.2	NA	NA	NA	NA	NA	NA	NA	K11E4.5	Y47D3A.28	NA	NA	NA	NA	NA	NA	NA	NA	NA	Y51H4A.7	W07G1.5	F42F12.8	F40A3.4	NA	NA	NA	NA	NA	NA	NA	NA	NA	NA	Y57E12B.4	NA	T16H12.11	NA	NA	NA	NA	NA	NA	NA	Y48B6A.4	NA	NA	NA	NA	NA
C10C6.6	Y48G1A.1	NA	NA	NA	NA	NA	NA	NA	K11H12.8	Y47D3A.4	NA	NA	NA	NA	NA	NA	NA	NA	NA	Y52B11A.4	W07G4.5	F42G10.1	F40A3.6	NA	NA	NA	NA	NA	NA	NA	NA	NA	NA	Y57G11A.4	NA	T16H12.2	NA	NA	NA	NA	NA	NA	NA	Y48B6A.7	NA	NA	NA	NA	NA
C10C6.7	Y48G1A.2	NA	NA	NA	NA	NA	NA	NA	K11H3.3	Y47D3A.5	NA	NA	NA	NA	NA	NA	NA	NA	NA	Y53C10A.4	W07G4.6	F42G2.4	F40E10.3	NA	NA	NA	NA	NA	NA	NA	NA	NA	NA	Y57G7A.11	NA	T16H12.4	NA	NA	NA	NA	NA	NA	NA	Y48B6A.9	NA	NA	NA	NA	NA
C10E2.2	Y48G1A.5	NA	NA	NA	NA	NA	NA	NA	K12D12.5	Y47D3A.6	NA	NA	NA	NA	NA	NA	NA	NA	NA	Y53F4B.27	W08E12.6	F42G2.8	F40E10.5	NA	NA	NA	NA	NA	NA	NA	NA	NA	NA	Y58G8A.5	NA	T17E9.1	NA	NA	NA	NA	NA	NA	NA	Y48G1BL.7	NA	NA	NA	NA	NA
C10E2.3	Y48G1BL.5	NA	NA	NA	NA	NA	NA	NA	K12H4.2	Y47G6A.12	NA	NA	NA	NA	NA	NA	NA	NA	NA	Y53F4B.39	W08G11.1	F42G8.5	F40F12.1	NA	NA	NA	NA	NA	NA	NA	NA	NA	NA	Y59H11AL.1	NA	T19A5.1	NA	NA	NA	NA	NA	NA	NA	Y48G1BM.9	NA	NA	NA	NA	NA
C10E2.4	Y48G1BL.6	NA	NA	NA	NA	NA	NA	NA	K12H6.2	Y47G6A.14	NA	NA	NA	NA	NA	NA	NA	NA	NA	Y53G8AM.4	W09G12.10	F42G9.8	F40F12.7	NA	NA	NA	NA	NA	NA	NA	NA	NA	NA	Y5F2A.1	NA	T19A6.3	NA	NA	NA	NA	NA	NA	NA	Y48G1BR.1	NA	NA	NA	NA	NA
C10E2.5	Y48G1C.1	NA	NA	NA	NA	NA	NA	NA	LLC1.1	Y47G6A.22	NA	NA	NA	NA	NA	NA	NA	NA	NA	Y53H1C.3	W09H1.1	F42G9.9	F40F4.5	NA	NA	NA	NA	NA	NA	NA	NA	NA	NA	Y60A3A.21	NA	T19A6.4	NA	NA	NA	NA	NA	NA	NA	Y48G8AL.15	NA	NA	NA	NA	NA
C10E2.6	Y48G1C.11	NA	NA	NA	NA	NA	NA	NA	LLC1.3	Y47H10A.1	NA	NA	NA	NA	NA	NA	NA	NA	NA	Y54E5A.1	W10C4.1	F42H10.3	F40F4.8	NA	NA	NA	NA	NA	NA	NA	NA	NA	NA	Y60C6A.1	NA	T19B10.11	NA	NA	NA	NA	NA	NA	NA	Y48G9A.9	NA	NA	NA	NA	NA
C10F3.1	Y48G1C.4	NA	NA	NA	NA	NA	NA	NA	M01A10.1	Y47H9C.7	NA	NA	NA	NA	NA	NA	NA	NA	NA	Y54F10AM.1	W10G11.1	F43C9.3	F40F8.4	NA	NA	NA	NA	NA	NA	NA	NA	NA	NA	Y61A9LA.1	NA	T19B10.6	NA	NA	NA	NA	NA	NA	NA	Y49A10A.1	NA	NA	NA	NA	NA
C10F3.2	Y48G8AL.10	NA	NA	NA	NA	NA	NA	NA	M01B12.4	Y48A5A.1	NA	NA	NA	NA	NA	NA	NA	NA	NA	Y54G2A.14	W10G11.16	F43D2.4	F40F8.5	NA	NA	NA	NA	NA	NA	NA	NA	NA	NA	Y62E10A.13	NA	T19B10.8	NA	NA	NA	NA	NA	NA	NA	Y49E10.11	NA	NA	NA	NA	NA
C10F3.3	Y49E10.1	NA	NA	NA	NA	NA	NA	NA	M01D7.6	Y48A6B.5	NA	NA	NA	NA	NA	NA	NA	NA	NA	Y54G2A.15	W10G11.17	F43G6.8	F40F8.8	NA	NA	NA	NA	NA	NA	NA	NA	NA	NA	Y66D12A.13	NA	T19B4.2	NA	NA	NA	NA	NA	NA	NA	Y49E10.24	NA	NA	NA	NA	NA
C10F3.4	Y49E10.14	NA	NA	NA	NA	NA	NA	NA	M01E11.2	Y48A6C.4	NA	NA	NA	NA	NA	NA	NA	NA	NA	Y54G2A.25	W10G11.2	F43G9.3	F40F9.2	NA	NA	NA	NA	NA	NA	NA	NA	NA	NA	Y67A10A.1	NA	T19B4.5	NA	NA	NA	NA	NA	NA	NA	Y50D4B.1	NA	NA	NA	NA	NA
[truncated: 16,012 more rows]
[truncated: 10 more columns]
