# Supplementary material for: The time-resolved transcriptome of C. elegans
Source: Genome Res. 2016 Oct;26(10):1441–50. doi: 10.1101/gr.202663.115 (PMC5052054; doi:10.1101/gr.202663.115)
Supplement: Supplemental Material [file supp_gr.202663.115_Supplemental_Table_S11.xlsx]

## Sheet: Sheet1
	gene	transcript	type (wb)	position	Mate	cluster	motif	type	expression pattern
T10C6.14	his-1	1393	H4	V:16.0		HIS1	1,1,3	replication dependent	Z
T10C6.13	his-2	981	H3	V:16.0		HIS1	1,1,3	replication dependent	Z
T10C6.12	his-3	1019	H2A	V:16.0		HIS1	1	replication dependent	Z
T10C6.11	his-4	932	H2B	V:16.0		HIS1	1	replication dependent	Z
F45F2.3	his-5	674	H4	V:8.5		HIS2	1,1,3	replication dependent	Z
F45F2.13	his-6	919	H3	V:8.5		HIS2	1,1,3	replication dependent	Z
F45F2.4	his-7	684	H2A	V:8.5		HIS2	1,2,3	replication dependent	Z
F45F2.12	his-8	660	H2B	V:8.5		HIS2	1,2,3	replication dependent	Z
F45F2.2	his-39	1013	H2B	V:8.5		HIS2	0	replication dependent	Z	not part of a set and poorly expressed
ZK131.3	his-9	937	H3	II:13.8	his-25, his-13	HIS3	1,3	replication dependent	Z
ZK131.4	his-10	312	H4	II:13.8	his-26, his-14	HIS3	1,3	replication dependent	Z
ZK131.5	his-11	537	H2B	II:13.8	his-44, his-15	HIS3	2,2	replication dependent	Z
ZK131.6	his-12	384	H2A	II:13.8	his-43	HIS3	2,2	replication dependent	Z
ZK131.7	his-13	865	H3	II:13.8	his-25, his-9	HIS3	1,3	replication dependent	Z
ZK131.8	his-14	312	H4	II:13.8	his-26, his-10	HIS3	1,3	replication dependent	Z
ZK131.9	his-15	369	H2B	II:13.8	his-44, his-15	HIS3	2,2	replication dependent	Z
ZK131.10	his-16	924	H2A	II:13.8		HIS3	2,2	replication dependent	Z
ZK131.2	his-25	644	H3	II:13.8	his-9, his-13	HIS3	1,3	replication dependent	Z
ZK131.1	his-26	312	H4	II:13.8	his-10, his-14	HIS3	1,3	replication dependent	Z	end of a partial set and poorly expressed
F08G2.3	his-42	836	H3	II:13.8		HIS3	-	replication dependent	Z
F08G2.2	his-43	384	H2A	II:13.8	his-12	HIS3	2,2	replication dependent	Z
F08G2.1	his-44	369	H2B	II:13.8	his-11, his-15	HIS3	2,2	replication dependent	Z
K06C4.5	his-17	468	H3	V:8.8		HIS4	1,2	replication dependent	Z
K06C4.10	his-18	451	H4	V:8.8		HIS4	1,2	replication dependent	Z
K06C4.11	his-19	384	H2A	V:8.8	his-51, his-53, his-21	HIS4	1,2,3	replication dependent	Z
K06C4.4	his-20	372	H2B	V:8.8	his-54, his-52, his-22	HIS4	1,2,3	replication dependent	Z
K06C4.3	his-21	384	H2A	V:8.8	his-51, his-53, his-19	HIS4	1,2,3	replication dependent	Z
K06C4.12	his-22	372	H2B	V:8.8	his-54, his-52, his-20	HIS4	1,2,3	replication dependent	Z
K06C4.13	his-27	411	H3	V:8.8	his-49	HIS4	1,2,3	replication dependent	Z
K06C4.2	his-28	312	H4	V:8.8	his-50	HIS4	1,2,3	replication dependent	Z
F07B7.5	his-49	411	H3	V:8.8	his-27	HIS4	1,2,3	replication dependent	Z
F07B7.9	his-50	312	H4	V:8.8	his-28	HIS4	1,2,3	replication dependent	Z
F07B7.10	his-51	384	H2A	V:8.8	his-53, his-19, his-21	HIS4	1,2,3	replication dependent	Z
F07B7.4	his-52	372	H2B	V:8.8	his-54, his-22, his-20	HIS4	1,2,3	replication dependent	Z
F07B7.3	his-53	384	H2A	V:8.8	his-51, his-19, his-21	HIS4	1,2,3	replication dependent	Z
F07B7.11	his-54	426	H2B	V:8.8	his-52, his-22, his-20	HIS4	1,2,3	replication dependent	Z
F35H10.11	his-29	369	H2B	IV:8.3	his-34	HIS5	2	replication dependent	Z
F35H10.1	his-30	384	H2A	IV:8.3	his-33	HIS5	2	replication dependent	Z
F17E9.12	his-31	334	H4	IV:8.3		HIS5	1,1(scanned)	replication dependent	Z
F17E9.10	his-32	468	H3	IV:8.3		HIS5	1,1(scanned)	replication dependent	Z
F17E9.13	his-33	661	H2A	IV:8.3	his-30	HIS5	2	replication dependent	Z
F17E9.9	his-34	1430	H2B	IV:8.3	his-29	HIS5	2	replication dependent	Z
C50F4.13	his-35	638	H2A	V:9.5				replacement histone
C50F4.5	his-41	869	H2B	V:9.5				replacement histone
C50F4.7	his-37	716	H4	V:9.5			-	replacement histone
K03A1.6	his-38	1171	H4	X:7.3		single	1,1	replication dependent
B0035.10	his-45	922	H3	IV:11.3	his-55	HIS6	1,1,3	replication dependent	M/Z
B0035.9	his-46	312	H4	IV:11.3	his-56	HIS6	1,1,3	replication dependent	M/Z
B0035.7	his-47	1103	H2A	IV:11.3	his-57, his-65	HIS6	2,2	replication dependent	M/Z
B0035.8	his-48	504	H2B	IV:11.3		HIS6	2,2	replication dependent	M/Z
F54E12.1	his-55	866	H3	IV:11.3	his-45	HIS6b	1,1,3	replication dependent	M/Z
F54E12.3	his-56	312	H4	IV:11.3	his-46	HIS6b	1,1,3	replication dependent	M/Z
F54E12.5	his-57	384	H2A	IV:11.3	his-47, his-65	HIS6b	2,2	replication dependent	M/Z
F54E12.4	his-58	499	H2B	IV:11.3	his-66	HIS6b	2,2	replication dependent	M/Z
F22B3.2	his-63	830	H3	IV:11.4		HIS6c	1,1	replication dependent	M/Z
F22B3.1	his-64	1016	H4	IV:11.4		HIS6c	1,1	replication dependent	M/Z
H02I12.7	his-65	936	H2A	IV:11.4	his-47, his-57	HIS6c	2,2	replication dependent	M/Z
H02I12.6	his-66	800	H2B	IV:11.4	his-58	HIS6c	2,2	replication dependent	M/Z
F55G1.2	his-59	1460	H3	IV:7.4		HIS7?	1	replication dependent	M/Z
F55G1.11	his-60	820	H4	IV:7.4		HIS7?	1	replication dependent	M/Z
F55G1.10	his-61	816	H2A	IV:7.4		HIS7?	2,2	replication dependent	M/Z
F55G1.3	his-62	1137	H2B	IV:7.4		HIS7?	2,2	replication dependent	M/Z
T23D8.5	his-67	1200	H4	I:9.9			2	replication dependent	M/Z
T23D8.6	his-68	515	H2A	I:9.9			2	replication dependent	M/Z
E03A3.3	his-69	894	H3.3-N- truncated	III:4.0			-	replacement histone
E03A3.4	his-70	1160	H3.3-C-truncated	III:4.0			-	replacement histone
F45E1.6	his-71	1136	H3.3	X:7.9			-	replacement histone
Y49E10.6	his-72	691	H3.3	III:12.3			-	replacement histone
W05B10.1	his-74	626	H3.3-diverged	V:12.6			-	replacement histone
M163.3	his-24	1028	H1	X:14.5			-	replacement histone
