# Supplementary material for: The time-resolved transcriptome of C. elegans
Source: Genome Res. 2016 Oct;26(10):1441–50. doi: 10.1101/gr.202663.115 (PMC5052054; doi:10.1101/gr.202663.115)
Supplement: Supplemental Material [file supp_gr.202663.115_Supplemental_Table_S14.xlsx]

## Sheet: Sheet1
Supplemental Table 14. Above threshold blocks of RNA-seq coverage outside of WormBase annotation
aggregate totalRNA + polyA+					THRESHOLD
	Length		1500	3000	4500	6000	9000	12000
	100		12861	8856	6561	5111	3428	2379
	200		6269	4227	3065	2394	1583	1098
	300		3509	2312	1633	1267	819	526
	400		2149	1426	934	764	449	275
	500		1475	939	629	500	291	164
	750		724	446	299	211	127	58
	1000		407	251	162	101	66	21
	2000		101	63	36	20	7	3
	3000		35	19	8	5	3	2
					THRESHOLD
aggregate polyA+ only	Length	1000	1500	3000	4500	6000	9000	12000
	100	7494	4988	2252	1326	969	689	549
	200	2742	1722	729	446	370	278	222
	300	1459	860	387	246	193	149	108
	400	795	467	204	127	102	77	62
	500	467	290	123	83	60	42	35
	750	182	104	42	24	12	12	11
	1000	80	46	18	10	5	4	3
	2000	8	5	2	1	1	1	0
	3000	0	0	0	0	0	0	0
Above threshold blocks of RNA-seq coverage outside of both WB annotation and outside of predicted aggregate transcripts
					THRESHOLD
aggregate totalRNA + polyA+	Length		1500	3000	4500	6000	9000	12000
	100		7741	2740	1912	1306	692	444
	200		1804	1034	725	484	267	192
	300		743	503	347	222	123	83
	400		350	287	185	121	61	35
	500		192	176	121	68	40	20
	750		58	71	46	26	15	5
	1000		23	33	21	12	9	2
	2000		3	3	4	2	1	0
	3000		1	0	2	1	0	0
					THRESHOLD
aggregate polyA+ only	Length	1000	1500	3000	4500	6000	9000	12000
	100	2734	1400	508	237	158	93	66
	200	689	336	139	63	42	30	17
	300	301	145	71	34	17	10	5
	400	140	78	34	15	5	6	3
	500	69	41	22	9	3	4	2
	750	19	17	8	5	1	0	0
	1000	12	7	2	1	1	0	0
	2000	2	1	1	0	0	0	0
	3000	0	0	0	0	0	0	0
